# Supplementary material for: Global Adaptation to a Lipid Environment Triggers the Dormancy-Related Phenotype of Mycobacterium tuberculosis
Source: PubMed Central journal article supplement — mBio. 2014 May 20;5(3):e01125-14. doi: 10.1128/mBio.01125-14 (PMC4030484; doi:10.1128/mbio.01125-14), 2014-05-20
Supplement: mbo002141827st1.pdf [file mbo002141827st1.pdf]

**Convention Description**

**DE RPKM** RPKM values for Dextrose exponential phase  
**FE RPKM** RPKM values for Fatty Acids exponential phase

**FDR Fisher Exact Test** Statistically significant differential expression between two conditions is determined by looking at genes with FDR values below 0.05.

**Top to bottom parts:** Genes are ordered from highest to lowest FDR values

Upper part: Genes with significant higher expression in FE *versus* DE

Middle part: Genes with significant lower expression in FE *versus* DE

Lower part: Genes with no significant differential expression

**Table S1A. Fisher Exact Test in Exponential Phase of Growth**

| GENES   | DE RPKM | FE RPKM | FDR Fisher Exact Test | Functional Category/Tuberculist         |
|---------|---------|---------|-----------------------|-----------------------------------------|
| Rv2204c | 136     | 148     | 2,53008E-13           | conserved hypotheticals                 |
| Rv2557  | 40      | 74      | 9,52705E-13           | conserved hypotheticals                 |
| Rv1398c | 192     | 317     | 1,08988E-12           | virulence, detoxification, adaptation   |
| Rv1996  | 44      | 85      | 1,08988E-12           | virulence, detoxification, adaptation   |
| Rv3229c | 20      | 76      | 1,08988E-12           | lipid metabolism                        |
| Rv0682  | 22      | 67      | 1,08988E-12           | information pathways                    |
| Rv3289c | 18      | 136     | 1,08988E-12           | cell wall and cell processes            |
| Rv3614c | 48      | 135     | 1,08988E-12           | cell wall and cell processes            |
| Rv0693  | 15      | 115     | 1,08988E-12           | intermediary metabolism and respiration |
| Rv1311  | 86      | 152     | 1,08988E-12           | intermediary metabolism and respiration |
| Rv3290c | 23      | 73      | 1,08988E-12           | intermediary metabolism and respiration |
| Rv2160A | 27      | 137     | 1,08988E-12           | regulatory proteins                     |
| Rv0079  | 64      | 102     | 1,08988E-12           | conserved hypotheticals                 |
| Rv0692  | 42      | 126     | 1,08988E-12           | conserved hypotheticals                 |
| Rv1813c | 51      | 180     | 1,08988E-12           | conserved hypotheticals                 |
| Rv3131  | 100     | 289     | 1,08988E-12           | conserved hypotheticals                 |
| Rv3906c | 4       | 34      | 2,7215E-12            | conserved hypotheticals                 |
| Rv0509  | 57      | 86      | 6,15535E-12           | intermediary metabolism and respiration |

|         |    |    |                                                     |
|---------|----|----|-----------------------------------------------------|
| Rv2393  | 9  | 38 | 5,98196E-11 intermediary metabolism and respiration |
| Rv3288c | 59 | 83 | 1,09818E-10 conserved hypotheticals                 |
| Rv2781c | 10 | 38 | 1,94249E-10 intermediary metabolism and respiration |
| Rv0190  | 73 | 91 | 7,37511E-10 conserved hypotheticals                 |
| Rv1110  | 25 | 52 | 9,75566E-10 cell wall and cell processes            |
| Rv1947  | 5  | 29 | 2,4711E-09 conserved hypotheticals                  |
| Rv0467  | 8  | 31 | 1,57666E-08 intermediary metabolism and respiration |
| Rv3686c | 28 | 51 | 1,60004E-08 conserved hypotheticals                 |
| Rv1733c | 13 | 36 | 2,6153E-08 cell wall and cell processes             |
| Rv3613c | 8  | 29 | 1,05817E-07 conserved hypotheticals                 |
| Rv1066  | 19 | 40 | 1,28318E-07 conserved hypotheticals                 |
| Rv3837c | 18 | 38 | 3,06494E-07 intermediary metabolism and respiration |
| Rv1184c | 5  | 24 | 3,69208E-07 cell wall and cell processes            |
| Rv2590  | 7  | 26 | 5,68146E-07 lipid metabolism                        |
| Rv0508  | 14 | 33 | 8,01608E-07 conserved hypotheticals                 |
| Rv2391  | 17 | 35 | 2,64378E-06 intermediary metabolism and respiration |
| Rv2161c | 67 | 72 | 3,02844E-06 intermediary metabolism and respiration |
| Rv0696  | 6  | 23 | 3,20971E-06 intermediary metabolism and respiration |
| Rv1310  | 53 | 62 | 3,85328E-06 intermediary metabolism and respiration |
| Rv3134c | 72 | 74 | 5,98851E-06 virulence, detoxification, adaptation   |
| Rv3923c | 39 | 51 | 6,07044E-06 information pathways                    |
| Rv1174c | 38 | 50 | 7,34397E-06 cell wall and cell processes            |
| Rv2392  | 8  | 24 | 8,89738E-06 intermediary metabolism and respiration |
| Rv2922A | 3  | 18 | 9,04757E-06 intermediary metabolism and respiration |
| Rv0866  | 16 | 32 | 1,03905E-05 intermediary metabolism and respiration |
| Rv2342  | 19 | 34 | 1,18582E-05 conserved hypotheticals                 |
| Rv1201c | 20 | 35 | 1,65011E-05 intermediary metabolism and respiration |
| Rv1904  | 9  | 24 | 2,14472E-05 conserved hypotheticals                 |
| Rv3588c | 3  | 17 | 2,42089E-05 intermediary metabolism and respiration |
| Rv3307  | 8  | 22 | 4,98361E-05 intermediary metabolism and respiration |
| Rv0145  | 29 | 40 | 5,22816E-05 lipid metabolism                        |
| Rv3922c | 59 | 61 | 5,51564E-05 virulence, detoxification, adaptation   |
| Rv0250c | 16 | 29 | 7,54408E-05 conserved hypotheticals                 |
| Rv1772  | 26 | 37 | 0,000115402 conserved hypotheticals                 |

|         |    |    |                                                     |
|---------|----|----|-----------------------------------------------------|
| Rv3825c | 33 | 42 | 0,000134584 lipid metabolism                        |
| Rv0808  | 31 | 39 | 0,000246399 intermediary metabolism and respiration |
| Rv3487c | 17 | 28 | 0,000396176 intermediary metabolism and respiration |
| Rv1638A | 17 | 28 | 0,000396176 conserved hypotheticals                 |
| Rv3241c | 11 | 22 | 0,000500956 information pathways                    |
| Rv2220  | 37 | 42 | 0,000504747 intermediary metabolism and respiration |
| Rv0291  | 26 | 34 | 0,000574297 intermediary metabolism and respiration |
| Rv1180  | 5  | 16 | 0,000588572 lipid metabolism                        |
| Rv2092c | 8  | 19 | 0,00059448 information pathways                     |
| Rv0870c | 10 | 20 | 0,001141502 cell wall and cell processes            |
| Rv3312A | 3  | 13 | 0,001144501 cell wall and cell processes            |
| Rv0697  | 3  | 13 | 0,001144501 intermediary metabolism and respiration |
| Rv2439c | 4  | 14 | 0,001265082 intermediary metabolism and respiration |
| Rv2159c | 30 | 36 | 0,001273258 conserved hypotheticals                 |
| Rv3907c | 8  | 18 | 0,001273772 information pathways                    |
| Rv1628c | 8  | 18 | 0,001273772 conserved hypotheticals                 |
| Rv2542  | 1  | 10 | 0,001544712 conserved hypotheticals                 |
| Rv0144  | 20 | 28 | 0,001591085 regulatory proteins                     |
| Rv2558  | 43 | 44 | 0,001741085 conserved hypotheticals                 |
| Rv1700  | 13 | 22 | 0,001797326 information pathways                    |
| Rv2902c | 30 | 35 | 0,00193951 information pathways                     |
| Rv1057  | 2  | 11 | 0,002210585 conserved hypotheticals                 |
| Rv3733c | 9  | 18 | 0,002504642 conserved hypotheticals                 |
| Rv0995  | 7  | 16 | 0,002860412 information pathways                    |
| Rv1927  | 4  | 13 | 0,002897917 conserved hypotheticals                 |
| Rv3416  | 6  | 15 | 0,002932085 regulatory proteins                     |
| Rv1448c | 23 | 29 | 0,003114912 intermediary metabolism and respiration |
| Rv0485  | 35 | 37 | 0,004191599 regulatory proteins                     |
| Rv1908c | 14 | 22 | 0,004337147 virulence, detoxification, adaptation   |
| Rv1870c | 11 | 19 | 0,004833326 conserved hypotheticals                 |
| Rv3230c | 19 | 25 | 0,005698678 intermediary metabolism and respiration |
| Rv3566A | 4  | 12 | 0,006747902 conserved hypotheticals                 |
| Rv3145  | 33 | 34 | 0,007665023 intermediary metabolism and respiration |
| Rv0981  | 21 | 26 | 0,00887793 regulatory proteins                      |

|         |      |     |                                                     |
|---------|------|-----|-----------------------------------------------------|
| Rv2258c | 21   | 26  | 0,00887793 regulatory proteins                      |
| Rv1309  | 26   | 29  | 0,009167849 intermediary metabolism and respiration |
| Rv0809  | 11   | 18  | 0,009207914 intermediary metabolism and respiration |
| Rv1932  | 25   | 28  | 0,0116419 virulence, detoxification, adaptation     |
| Rv2793c | 6    | 13  | 0,014028953 information pathways                    |
| Rv3261  | 4    | 11  | 0,015453196 intermediary metabolism and respiration |
| Rv1392  | 30   | 31  | 0,016122276 intermediary metabolism and respiration |
| Rv0716  | 28   | 29  | 0,018883796 information pathways                    |
| Rv2052c | 8    | 15  | 0,019506044 conserved hypotheticals                 |
| Rv0512  | 18   | 22  | 0,020473912 intermediary metabolism and respiration |
| Rv0211  | 29   | 30  | 0,020878301 intermediary metabolism and respiration |
| Rv0516c | 16   | 21  | 0,020987415 information pathways                    |
| Rv3271c | 16   | 21  | 0,020987415 cell wall and cell processes            |
| Rv1610  | 24   | 26  | 0,023157422 cell wall and cell processes            |
| Rv1489  | 9    | 15  | 0,02538925 conserved hypotheticals                  |
| Rv1436  | 20   | 23  | 0,028210956 intermediary metabolism and respiration |
| Rv3673c | 20   | 23  | 0,028210956 intermediary metabolism and respiration |
| Rv0629c | 6    | 12  | 0,028599179 information pathways                    |
| Rv2394  | 6    | 12  | 0,028599179 intermediary metabolism and respiration |
| Rv3364c | 6    | 12  | 0,028599179 conserved hypotheticals                 |
| Rv3612c | 6    | 12  | 0,028599179 conserved hypotheticals                 |
| Rv0683  | 23   | 25  | 0,028789283 information pathways                    |
| Rv0694  | 23   | 25  | 0,028789283 intermediary metabolism and respiration |
| Rv1397c | 16   | 20  | 0,032143395 virulence, detoxification, adaptation   |
| Rv2382c | 2    | 8   | 0,03222415 lipid metabolism                         |
| Rv1462  | 21   | 23  | 0,034289899 conserved hypotheticals                 |
| Rv2440c | 24   | 25  | 0,034950697 intermediary metabolism and respiration |
| Rv2794c | 17   | 20  | 0,041089059 lipid metabolism                        |
| Rv2792c | 13   | 17  | 0,045951102 insertion seqs and phages               |
| Rv3402c | 0    | 5   | 0,04819286 cell wall and cell processes             |
| Rv1331  | 511  | 91  | 4,64914E-14 conserved hypotheticals                 |
| Rv0569  | 278  | 239 | 1,86234E-13 conserved hypotheticals                 |
| Rv3269  | 324  | 36  | 1,08988E-12 virulence, detoxification, adaptation   |
| Rv3407  | 1477 | 237 | 1,08988E-12 virulence, detoxification, adaptation   |

|         |      |     |                                                     |
|---------|------|-----|-----------------------------------------------------|
| Rv3648c | 2249 | 501 | 1,08988E-12 virulence, detoxification, adaptation   |
| Rv2244  | 751  | 49  | 1,08988E-12 lipid metabolism                        |
| Rv1198  | 433  | 64  | 1,08988E-12 cell wall and cell processes            |
| Rv3875  | 1465 | 189 | 1,08988E-12 cell wall and cell processes            |
| Rv2007c | 852  | 150 | 1,08988E-12 intermediary metabolism and respiration |
| Rv3503c | 350  | 20  | 1,08988E-12 intermediary metabolism and respiration |
| Rv3582c | 258  | 246 | 1,08988E-12 intermediary metabolism and respiration |
| Rv3841  | 2327 | 292 | 1,08988E-12 intermediary metabolism and respiration |
| Rv1738  | 485  | 369 | 1,08988E-12 conserved hypotheticals                 |
| Rv1872c | 180  | 173 | 1,96013E-12 intermediary metabolism and respiration |
| Rv3130c | 161  | 157 | 1,40859E-11 lipid metabolism                        |
| Rv3478  | 178  | 168 | 1,48911E-11 PE/PPE                                  |
| Rv4014  | 211  | 187 | 2,5506E-11 NA                                       |
| Rv1197  | 273  | 42  | 2,35496E-09 cell wall and cell processes            |
| Rv2137c | 489  | 105 | 5,19248E-09 conserved hypotheticals                 |
| Rv1211  | 356  | 67  | 1,09686E-08 conserved hypotheticals                 |
| Rv1871c | 133  | 126 | 1,26602E-08 conserved hypotheticals                 |
| Rv3865  | 147  | 15  | 6,87089E-08 cell wall and cell processes            |
| Rv3874  | 688  | 176 | 1,34615E-07 cell wall and cell processes            |
| Rv2245  | 261  | 46  | 3,6155E-07 lipid metabolism                         |
| Rv1884c | 129  | 13  | 5,08758E-07 cell wall and cell processes            |
| Rv0288  | 287  | 55  | 1,05293E-06 cell wall and cell processes            |
| Rv1233c | 127  | 14  | 3,44657E-06 cell wall and cell processes            |
| Rv3616c | 223  | 165 | 3,78981E-06 cell wall and cell processes            |
| Rv3597c | 252  | 47  | 3,83287E-06 information pathways                    |
| Rv3804c | 130  | 111 | 4,09407E-06 lipid metabolism                        |
| Rv2791c | 183  | 29  | 6,48196E-06 insertion seqs and phages               |
| Rv1156  | 212  | 37  | 6,50928E-06 conserved hypotheticals                 |
| Rv2986c | 140  | 18  | 6,76359E-06 information pathways                    |
| Rv0608  | 95   | 8   | 7,10526E-06 virulence, detoxification, adaptation   |
| Rv0723  | 220  | 40  | 1,10258E-05 information pathways                    |
| Rv3246c | 164  | 25  | 1,37845E-05 regulatory proteins                     |
| Rv2576c | 103  | 11  | 2,89396E-05 cell wall and cell processes            |
| Rv0991c | 63   | 3   | 3,02077E-05 conserved hypotheticals                 |

|         |     |     |                                                     |
|---------|-----|-----|-----------------------------------------------------|
| Rv0175  | 93  | 84  | 3,02367E-05 cell wall and cell processes            |
| Rv3389c | 104 | 12  | 6,07691E-05 intermediary metabolism and respiration |
| Rv0350  | 91  | 9   | 7,50177E-05 virulence, detoxification, adaptation   |
| Rv1950c | 53  | 2   | 0,000104087 conserved hypotheticals                 |
| Rv1274  | 233 | 48  | 0,000108672 cell wall and cell processes            |
| Rv3854c | 67  | 5   | 0,000188916 intermediary metabolism and respiration |
| Rv0996  | 94  | 11  | 0,000238854 cell wall and cell processes            |
| Rv3052c | 93  | 79  | 0,000251217 information pathways                    |
| Rv3208A | 166 | 30  | 0,00031171 conserved hypotheticals                  |
| Rv0710  | 239 | 52  | 0,00037835 information pathways                     |
| Rv2623  | 83  | 72  | 0,000395754 virulence, detoxification, adaptation   |
| Rv0286  | 143 | 25  | 0,000597182 PE/PPE                                  |
| Rv3250c | 63  | 59  | 0,000639154 intermediary metabolism and respiration |
| Rv0951  | 71  | 7   | 0,000750553 intermediary metabolism and respiration |
| Rv0500B | 132 | 22  | 0,000760917 conserved hypotheticals                 |
| Rv2641  | 52  | 3   | 0,000812025 conserved hypotheticals                 |
| Rv0353  | 66  | 6   | 0,000980977 virulence, detoxification, adaptation   |
| Rv4011  | 94  | 13  | 0,00118896 NA                                       |
| Rv0379  | 90  | 12  | 0,001200424 cell wall and cell processes            |
| Rv4012  | 83  | 10  | 0,001229973 NA                                      |
| Rv0129c | 77  | 9   | 0,001613314 lipid metabolism                        |
| Rv2584c | 46  | 46  | 0,001751048 intermediary metabolism and respiration |
| Rv1883c | 139 | 26  | 0,001967182 conserved hypotheticals                 |
| Rv0430  | 84  | 11  | 0,002260991 conserved hypotheticals                 |
| Rv2928  | 47  | 3   | 0,002484955 lipid metabolism                        |
| Rv0274  | 41  | 2   | 0,00275143 conserved hypotheticals                  |
| Rv0599c | 62  | 6   | 0,002805026 virulence, detoxification, adaptation   |
| Rv3429  | 42  | 2   | 0,002848023 PE/PPE                                  |
| Rv3029c | 141 | 27  | 0,002939717 intermediary metabolism and respiration |
| Rv0634A | 218 | 51  | 0,003270314 conserved hypotheticals                 |
| Rv1065  | 43  | 42  | 0,003825961 conserved hypotheticals                 |
| Rv2031c | 454 | 257 | 0,003996227 virulence, detoxification, adaptation   |
| Rv3123  | 34  | 1   | 0,003999773 conserved hypotheticals                 |
| Rv3075c | 80  | 11  | 0,004009131 conserved hypotheticals                 |

|         |     |     |                                                     |
|---------|-----|-----|-----------------------------------------------------|
| Rv0055  | 81  | 11  | 0,004113124 information pathways                    |
| Rv2927c | 158 | 33  | 0,004121858 conserved hypotheticals                 |
| Rv0810c | 130 | 25  | 0,005904039 conserved hypotheticals                 |
| Rv2830c | 89  | 14  | 0,00648382 virulence, detoxification, adaptation    |
| Rv3456c | 80  | 63  | 0,006771499 information pathways                    |
| Rv0660c | 152 | 32  | 0,007513567 virulence, detoxification, adaptation   |
| Rv0572c | 37  | 2   | 0,008935106 conserved hypotheticals                 |
| Rv0863  | 75  | 11  | 0,010174754 conserved hypotheticals                 |
| Rv0961  | 90  | 15  | 0,010718125 cell wall and cell processes            |
| Rv2606c | 59  | 7   | 0,010803196 intermediary metabolism and respiration |
| Rv2959c | 41  | 3   | 0,01109066 intermediary metabolism and respiration  |
| Rv1159A | 64  | 8   | 0,011106177 conserved hypotheticals                 |
| Rv2356c | 45  | 4   | 0,012917201 PE/PPE                                  |
| Rv3418c | 103 | 19  | 0,013170322 virulence, detoxification, adaptation   |
| Rv2477c | 74  | 11  | 0,013571721 cell wall and cell processes            |
| Rv3615c | 330 | 190 | 0,014104984 cell wall and cell processes            |
| Rv2376c | 32  | 32  | 0,014889522 cell wall and cell processes            |
| Rv0443  | 178 | 42  | 0,0168436 conserved hypotheticals                   |
| Rv0500A | 92  | 16  | 0,017263613 conserved hypotheticals                 |
| Rv3583c | 841 | 430 | 0,017748709 regulatory proteins                     |
| Rv3197  | 45  | 40  | 0,019499787 cell wall and cell processes            |
| Rv1846c | 62  | 50  | 0,021083181 regulatory proteins                     |
| Rv3219  | 436 | 239 | 0,021089515 regulatory proteins                     |
| Rv3581c | 72  | 55  | 0,022516565 intermediary metabolism and respiration |
| Rv3477  | 348 | 196 | 0,023914995 PE/PPE                                  |
| Rv1107c | 44  | 39  | 0,024792518 information pathways                    |
| Rv3905c | 44  | 39  | 0,024792518 cell wall and cell processes            |
| Rv2430c | 59  | 8   | 0,027431851 PE/PPE                                  |
| Rv1993c | 32  | 2   | 0,027982743 conserved hypotheticals                 |
| Rv2185c | 106 | 21  | 0,028197886 conserved hypotheticals                 |
| Rv2338c | 33  | 2   | 0,028467376 intermediary metabolism and respiration |
| Rv1312  | 35  | 33  | 0,028617767 cell wall and cell processes            |
| Rv3489  | 91  | 17  | 0,032201 conserved hypotheticals                    |
| Rv2626c | 116 | 25  | 0,036849616 conserved hypotheticals                 |

|         |     |     |                                                     |
|---------|-----|-----|-----------------------------------------------------|
| Rv0287  | 314 | 91  | 0,040983091 cell wall and cell processes            |
| Rv0709  | 372 | 112 | 0,04320245 information pathways                     |
| Rv0220  | 29  | 28  | 0,043986188 intermediary metabolism and respiration |
| Rv1926c | 35  | 3   | 0,045988903 cell wall and cell processes            |
| Rv2115c | 40  | 35  | 0,046134125 cell wall and cell processes            |
| Rv1094  | 201 | 120 | 0,047052088 lipid metabolism                        |
| Rv3807c | 37  | 33  | 0,048717939 cell wall and cell processes            |
| Rv3010c | 71  | 12  | 0,050616957 intermediary metabolism and respiration |
| Rv2837c | 22  | 23  | 0,058504381 conserved hypotheticals                 |
| Rv1498A | 29  | 2   | 0,058721983 conserved hypotheticals                 |
| Rv2816c | 29  | 2   | 0,058721983 conserved hypotheticals                 |
| Rv2985  | 6   | 11  | 0,058304769 information pathways                    |
| Rv4004  | 30  | 2   | 0,059658809 NA                                      |
| Rv0757  | 73  | 13  | 0,060203695 regulatory proteins                     |
| Rv1055  | 58  | 9   | 0,061768228 insertion seqs and phages               |
| Rv3262  | 5   | 10  | 0,065442756 intermediary metabolism and respiration |
| Rv3769  | 54  | 8   | 0,06535549 conserved hypotheticals                  |
| Rv2625c | 33  | 3   | 0,066321675 cell wall and cell processes            |
| Rv1736c | 33  | 3   | 0,066321675 intermediary metabolism and respiration |
| Rv2865  | 24  | 1   | 0,067697843 virulence, detoxification, adaptation   |
| Rv2243  | 24  | 1   | 0,067697843 lipid metabolism                        |
| Rv3136  | 50  | 7   | 0,067467795 PE/PPE                                  |
| Rv3207c | 23  | 23  | 0,067900131 conserved hypotheticals                 |
| Rv1815  | 38  | 4   | 0,069194894 conserved hypotheticals                 |
| Rv3435c | 46  | 6   | 0,06911532 cell wall and cell processes             |
| Rv0577  | 46  | 6   | 0,06911532 conserved hypotheticals                  |
| Rv3826  | 4   | 9   | 0,069833494 lipid metabolism                        |
| Rv2045c | 4   | 9   | 0,069833494 intermediary metabolism and respiration |
| Rv0954  | 105 | 23  | 0,069336263 cell wall and cell processes            |
| Rv1603  | 7   | 12  | 0,072639008 intermediary metabolism and respiration |
| Rv2094c | 120 | 77  | 0,073154719 cell wall and cell processes            |
| Rv1461  | 24  | 24  | 0,07292522 conserved hypotheticals                  |
| Rv0114  | 3   | 8   | 0,073416337 cell wall and cell processes            |
| Rv0632c | 61  | 10  | 0,07394232 lipid metabolism                         |



|         |     |    |                                                     |
|---------|-----|----|-----------------------------------------------------|
| Rv1337  | 61  | 10 | 0,07394232 cell wall and cell processes             |
| Rv0252  | 2   | 7  | 0,073426729 intermediary metabolism and respiration |
| Rv3140  | 56  | 9  | 0,079321382 lipid metabolism                        |
| Rv2348c | 81  | 56 | 0,089686454 unknown                                 |
| Rv2825c | 37  | 31 | 0,093746383 conserved hypotheticals                 |
| Rv0827c | 40  | 5  | 0,095960115 regulatory proteins                     |
| Rv1122  | 12  | 15 | 0,095783612 intermediary metabolism and respiration |
| Rv0640  | 93  | 20 | 0,096846947 information pathways                    |
| Rv0545c | 30  | 27 | 0,096799291 cell wall and cell processes            |
| Rv1245c | 22  | 1  | 0,09650988 intermediary metabolism and respiration  |
| Rv2442c | 144 | 36 | 0,097113243 information pathways                    |
| Rv0236A | 37  | 4  | 0,097028157 cell wall and cell processes            |
| Rv1842c | 8   | 12 | 0,09731203 cell wall and cell processes             |
| Rv2259  | 8   | 12 | 0,09731203 intermediary metabolism and respiration  |
| Rv2453c | 8   | 12 | 0,09731203 intermediary metabolism and respiration  |
| Rv3862c | 17  | 0  | 0,098442537 regulatory proteins                     |
| Rv3127  | 62  | 45 | 0,101892711 conserved hypotheticals                 |
| Rv2763c | 15  | 17 | 0,102750299 intermediary metabolism and respiration |
| Rv3045  | 31  | 27 | 0,106664124 intermediary metabolism and respiration |
| Rv2457c | 75  | 52 | 0,110513688 intermediary metabolism and respiration |
| Rv0708  | 159 | 42 | 0,119772339 information pathways                    |
| Rv2193  | 92  | 20 | 0,119858288 intermediary metabolism and respiration |
| Rv0468  | 11  | 14 | 0,121790272 lipid metabolism                        |
| Rv0042c | 11  | 14 | 0,121790272 regulatory proteins                     |
| Rv0290  | 41  | 33 | 0,121187886 cell wall and cell processes            |
| Rv2352c | 66  | 47 | 0,121812184 PE/PPE                                  |
| Rv0352  | 68  | 13 | 0,123114777 virulence, detoxification, adaptation   |
| Rv2628  | 22  | 21 | 0,125908352 conserved hypotheticals                 |
| Rv0434  | 5   | 9  | 0,126266161 conserved hypotheticals                 |
| Rv2919c | 56  | 41 | 0,126136462 regulatory proteins                     |
| Rv2472  | 0   | 4  | 0,129960509 conserved hypotheticals                 |
| Rv1324  | 38  | 31 | 0,131831444 intermediary metabolism and respiration |
| Rv0543c | 30  | 26 | 0,133260886 conserved hypotheticals                 |
| Rv0490  | 64  | 12 | 0,134714634 regulatory proteins                     |

|         |    |    |                                                     |
|---------|----|----|-----------------------------------------------------|
| Rv3251c | 23 | 22 | 0,134455986 intermediary metabolism and respiration |
| Rv0351  | 54 | 9  | 0,135912651 virulence, detoxification, adaptation   |
| Rv0338c | 54 | 9  | 0,135912651 intermediary metabolism and respiration |
| Rv0684  | 75 | 51 | 0,137414524 information pathways                    |
| Rv2840c | 95 | 62 | 0,139719593 conserved hypotheticals                 |
| Rv2668  | 4  | 8  | 0,140770588 cell wall and cell processes            |
| Rv0118c | 4  | 8  | 0,140770588 intermediary metabolism and respiration |
| Rv3383c | 12 | 14 | 0,154322087 lipid metabolism                        |
| Rv1859  | 3  | 7  | 0,157368201 cell wall and cell processes            |
| Rv1907c | 3  | 7  | 0,157368201 conserved hypotheticals                 |
| Rv2304c | 3  | 7  | 0,157368201 conserved hypotheticals                 |
| Rv1857  | 10 | 13 | 0,156986026 cell wall and cell processes            |
| Rv1987  | 46 | 7  | 0,156986026 cell wall and cell processes            |
| Rv0526  | 18 | 18 | 0,159994645 intermediary metabolism and respiration |
| Rv3161c | 6  | 10 | 0,161386702 intermediary metabolism and respiration |
| Rv1620c | 1  | 5  | 0,162543007 intermediary metabolism and respiration |
| Rv3008  | 25 | 2  | 0,162543007 conserved hypotheticals                 |
| Rv3223c | 42 | 6  | 0,165830325 information pathways                    |
| Rv3723  | 42 | 6  | 0,165830325 cell wall and cell processes            |
| Rv1612  | 29 | 25 | 0,164920258 intermediary metabolism and respiration |
| Rv2009  | 29 | 3  | 0,171717428 virulence, detoxification, adaptation   |
| Rv2574  | 29 | 3  | 0,171717428 conserved hypotheticals                 |
| Rv2347c | 88 | 20 | 0,176951182 cell wall and cell processes            |
| Rv1185c | 11 | 13 | 0,194057962 lipid metabolism                        |
| Rv0039c | 11 | 13 | 0,194057962 cell wall and cell processes            |
| Rv1006  | 11 | 13 | 0,194057962 conserved hypotheticals                 |
| Rv1466  | 20 | 19 | 0,199566498 conserved hypotheticals                 |
| Rv2288  | 14 | 15 | 0,204391447 conserved hypotheticals                 |
| Rv1631  | 17 | 17 | 0,204682508 intermediary metabolism and respiration |
| Rv0459  | 17 | 17 | 0,204682508 conserved hypotheticals                 |
| Rv0043c | 7  | 10 | 0,211741059 regulatory proteins                     |
| Rv0652  | 32 | 26 | 0,21139118 information pathways                     |
| Rv1036c | 20 | 1  | 0,212730588 insertion seqs and phages               |
| Rv1893  | 20 | 1  | 0,212730588 conserved hypotheticals                 |

|         |     |    |                                                     |
|---------|-----|----|-----------------------------------------------------|
| Rv2624c | 13  | 0  | 0,216756554 virulence, detoxification, adaptation   |
| Rv2588c | 25  | 22 | 0,23007227 cell wall and cell processes             |
| Rv1301  | 25  | 22 | 0,23007227 conserved hypotheticals                  |
| Rv0188  | 36  | 5  | 0,231690122 cell wall and cell processes            |
| Rv0412c | 23  | 2  | 0,231287052 cell wall and cell processes            |
| Rv3675  | 23  | 2  | 0,231287052 cell wall and cell processes            |
| Rv2166c | 23  | 2  | 0,231287052 conserved hypotheticals                 |
| Rv1103c | 24  | 2  | 0,235464217 virulence, detoxification, adaptation   |
| Rv0581  | 31  | 4  | 0,238625105 virulence, detoxification, adaptation   |
| Rv0506  | 31  | 4  | 0,238625105 cell wall and cell processes            |
| Rv2909c | 28  | 3  | 0,241784776 information pathways                    |
| Rv3898c | 28  | 3  | 0,241784776 conserved hypotheticals                 |
| Rv0056  | 76  | 17 | 0,246082967 information pathways                    |
| Rv3252c | 10  | 12 | 0,245648047 lipid metabolism                        |
| Rv3703c | 10  | 12 | 0,245648047 conserved hypotheticals                 |
| Rv0968  | 61  | 42 | 0,244785882 conserved hypotheticals                 |
| Rv1591  | 13  | 14 | 0,261356188 cell wall and cell processes            |
| Rv3248c | 31  | 25 | 0,261316257 intermediary metabolism and respiration |
| Rv1489A | 23  | 20 | 0,267631545 conserved hypotheticals                 |
| Rv0276  | 66  | 14 | 0,277078372 conserved hypotheticals                 |
| Rv2708c | 73  | 16 | 0,277854783 conserved hypotheticals                 |
| Rv0659c | 137 | 37 | 0,278626705 virulence, detoxification, adaptation   |
| Rv1394c | 4   | 7  | 0,278537579 intermediary metabolism and respiration |
| Rv3293  | 4   | 7  | 0,278537579 intermediary metabolism and respiration |
| Rv2049c | 4   | 7  | 0,278537579 conserved hypotheticals                 |
| Rv2331  | 4   | 7  | 0,278537579 conserved hypotheticals                 |
| Rv2134c | 42  | 31 | 0,2829849 conserved hypotheticals                   |
| Rv1891  | 38  | 6  | 0,282884659 conserved hypotheticals                 |
| Rv1161  | 28  | 23 | 0,282784986 intermediary metabolism and respiration |
| Rv1095  | 59  | 40 | 0,283525537 intermediary metabolism and respiration |
| Rv3237c | 8   | 10 | 0,282866423 conserved hypotheticals                 |
| Rv2633c | 39  | 6  | 0,287081517 conserved hypotheticals                 |
| Rv0469  | 55  | 11 | 0,298072605 lipid metabolism                        |
| Rv3917c | 34  | 5  | 0,300976257 cell wall and cell processes            |

|         |     |    |                                                     |
|---------|-----|----|-----------------------------------------------------|
| Rv0040c | 35  | 5  | 0,310073482 cell wall and cell processes            |
| Rv3188  | 35  | 5  | 0,310073482 conserved hypotheticals                 |
| Rv2748c | 45  | 8  | 0,31411928 cell wall and cell processes             |
| Rv0554  | 3   | 6  | 0,315988564 virulence, detoxification, adaptation   |
| Rv3523  | 3   | 6  | 0,315988564 lipid metabolism                        |
| Rv2388c | 3   | 6  | 0,315988564 intermediary metabolism and respiration |
| Rv3572  | 3   | 6  | 0,315988564 conserved hypotheticals                 |
| Rv1894c | 22  | 2  | 0,316731148 conserved hypotheticals                 |
| Rv1741  | 12  | 0  | 0,318432861 virulence, detoxification, adaptation   |
| Rv0990c | 12  | 0  | 0,318432861 conserved hypotheticals                 |
| Rv3321c | 26  | 3  | 0,319929051 virulence, detoxification, adaptation   |
| Rv2936  | 26  | 3  | 0,319929051 cell wall and cell processes            |
| Rv3200c | 26  | 3  | 0,319929051 cell wall and cell processes            |
| Rv2694c | 51  | 10 | 0,324273925 conserved hypotheticals                 |
| Rv1843c | 22  | 19 | 0,327389008 intermediary metabolism and respiration |
| Rv2297  | 22  | 19 | 0,327389008 conserved hypotheticals                 |
| Rv0700  | 101 | 61 | 0,327888747 information pathways                    |
| Rv1308  | 40  | 29 | 0,327675479 intermediary metabolism and respiration |
| Rv3921c | 64  | 14 | 0,330354271 cell wall and cell processes            |
| Rv0936  | 15  | 15 | 0,33000455 cell wall and cell processes             |
| Rv2124c | 12  | 13 | 0,330571662 intermediary metabolism and respiration |
| Rv1297  | 52  | 36 | 0,332309105 information pathways                    |
| Rv0850  | 0   | 3  | 0,332347087 insertion seqs and phages               |
| Rv2950c | 41  | 30 | 0,335756702 lipid metabolism                        |
| Rv2696c | 87  | 21 | 0,335785483 conserved hypotheticals                 |
| Rv1133c | 95  | 58 | 0,337749271 intermediary metabolism and respiration |
| Rv0511  | 47  | 33 | 0,341632987 intermediary metabolism and respiration |
| Rv0624  | 2   | 5  | 0,341389637 virulence, detoxification, adaptation   |
| Rv1786  | 2   | 5  | 0,341389637 intermediary metabolism and respiration |
| Rv3705c | 2   | 5  | 0,341389637 conserved hypotheticals                 |
| Rv2184c | 19  | 17 | 0,34155856 conserved hypotheticals                  |
| Rv2403c | 5   | 8  | 0,342461128 cell wall and cell processes            |
| Rv1558  | 5   | 8  | 0,342461128 conserved hypotheticals                 |
| Rv0636  | 104 | 27 | 0,342735918 intermediary metabolism and respiration |

|         |     |    |                                                     |
|---------|-----|----|-----------------------------------------------------|
| Rv3870  | 47  | 9  | 0,347536336 cell wall and cell processes            |
| Rv0670  | 36  | 6  | 0,356587411 information pathways                    |
| Rv1749c | 36  | 6  | 0,356587411 cell wall and cell processes            |
| Rv2945c | 37  | 6  | 0,356587411 cell wall and cell processes            |
| Rv0078A | 36  | 6  | 0,356587411 conserved hypotheticals                 |
| Rv1639c | 16  | 15 | 0,356862261 cell wall and cell processes            |
| Rv2041c | 1   | 4  | 0,357209474 cell wall and cell processes            |
| Rv2669  | 1   | 4  | 0,357209474 intermediary metabolism and respiration |
| Rv0498  | 1   | 4  | 0,357209474 conserved hypotheticals                 |
| Rv2374c | 60  | 13 | 0,354913433 virulence, detoxification, adaptation   |
| Rv3274c | 60  | 13 | 0,354913433 lipid metabolism                        |
| Rv3592  | 61  | 40 | 0,353401683 intermediary metabolism and respiration |
| Rv3236c | 10  | 11 | 0,36035763 cell wall and cell processes             |
| Rv2954c | 10  | 11 | 0,36035763 conserved hypotheticals                  |
| Rv0605  | 44  | 31 | 0,37148914 insertion seqs and phages                |
| Rv0615  | 32  | 5  | 0,377135392 cell wall and cell processes            |
| Rv2144c | 192 | 58 | 0,377182298 cell wall and cell processes            |
| Rv1127c | 33  | 5  | 0,376624829 intermediary metabolism and respiration |
| Rv2005c | 39  | 28 | 0,381373625 virulence, detoxification, adaptation   |
| Rv2309c | 16  | 1  | 0,391269806 insertion seqs and phages               |
| Rv3528c | 16  | 1  | 0,391269806 conserved hypotheticals                 |
| Rv0171  | 56  | 12 | 0,39500372 virulence, detoxification, adaptation    |
| Rv2530A | 57  | 12 | 0,400139952 virulence, detoxification, adaptation   |
| Rv3891c | 17  | 1  | 0,408824087 cell wall and cell processes            |
| Rv0703  | 252 | 80 | 0,411645324 information pathways                    |
| Rv0053  | 24  | 3  | 0,417415981 information pathways                    |
| Rv1528c | 20  | 2  | 0,418784439 lipid metabolism                        |
| Rv0686  | 20  | 2  | 0,418784439 cell wall and cell processes            |
| Rv1216c | 20  | 2  | 0,418784439 cell wall and cell processes            |
| Rv4007  | 20  | 2  | 0,418784439 NA                                      |
| Rv0455c | 72  | 17 | 0,417166619 conserved hypotheticals                 |
| Rv0704  | 114 | 31 | 0,416533255 information pathways                    |
| Rv3524  | 25  | 3  | 0,416835388 cell wall and cell processes            |
| Rv3859c | 18  | 16 | 0,422718075 intermediary metabolism and respiration |

|         |     |    |                                                     |
|---------|-----|----|-----------------------------------------------------|
| Rv0116c | 21  | 2  | 0,422308197 cell wall and cell processes            |
| Rv3642c | 66  | 15 | 0,43150729 conserved hypotheticals                  |
| Rv2147c | 45  | 9  | 0,430847879 conserved hypotheticals                 |
| Rv0363c | 52  | 11 | 0,435952 intermediary metabolism and respiration    |
| Rv1797  | 62  | 40 | 0,440342784 cell wall and cell processes            |
| Rv0755A | 15  | 14 | 0,448841574 insertion seqs and phages               |
| Rv1295  | 15  | 14 | 0,448841574 intermediary metabolism and respiration |
| Rv0985c | 10  | 0  | 0,456704009 cell wall and cell processes            |
| Rv1801  | 10  | 0  | 0,456704009 PE/PPE                                  |
| Rv1670  | 10  | 0  | 0,456704009 conserved hypotheticals                 |
| Rv2466c | 10  | 0  | 0,456704009 conserved hypotheticals                 |
| Rv1611  | 38  | 27 | 0,457170502 intermediary metabolism and respiration |
| Rv1613  | 38  | 27 | 0,457170502 intermediary metabolism and respiration |
| Rv2461c | 38  | 27 | 0,457170502 intermediary metabolism and respiration |
| Rv0814c | 9   | 10 | 0,45529619 intermediary metabolism and respiration  |
| Rv2028c | 11  | 0  | 0,459870181 virulence, detoxification, adaptation   |
| Rv3855  | 11  | 0  | 0,459870181 regulatory proteins                     |
| Rv3054c | 11  | 0  | 0,459870181 conserved hypotheticals                 |
| Rv0720  | 92  | 24 | 0,458217169 information pathways                    |
| Rv1677  | 19  | 16 | 0,458744843 cell wall and cell processes            |
| Rv3408  | 127 | 72 | 0,473677763 virulence, detoxification, adaptation   |
| Rv1799  | 48  | 10 | 0,479587009 cell wall and cell processes            |
| Rv0685  | 99  | 58 | 0,482932249 information pathways                    |
| Rv0341  | 150 | 83 | 0,482932249 cell wall and cell processes            |
| Rv0979A | 29  | 22 | 0,486941951 information pathways                    |
| Rv3800c | 46  | 31 | 0,491344735 lipid metabolism                        |
| Rv2053c | 16  | 14 | 0,496821678 cell wall and cell processes            |
| Rv1322A | 75  | 46 | 0,497036784 conserved hypotheticals                 |
| Rv2941  | 61  | 39 | 0,516631429 lipid metabolism                        |
| Rv1073  | 30  | 22 | 0,520604561 conserved hypotheticals                 |
| Rv2178c | 37  | 7  | 0,521741838 intermediary metabolism and respiration |
| Rv0364  | 13  | 12 | 0,530770262 cell wall and cell processes            |
| Rv2246  | 72  | 18 | 0,534254902 lipid metabolism                        |
| Rv3677c | 17  | 15 | 0,537078217 intermediary metabolism and respiration |

|         |     |    |                                                     |
|---------|-----|----|-----------------------------------------------------|
| Rv0143c | 5   | 7  | 0,53967436 cell wall and cell processes             |
| Rv3041c | 7   | 8  | 0,541294199 cell wall and cell processes            |
| Rv3382c | 7   | 8  | 0,541294199 cell wall and cell processes            |
| Rv2978c | 7   | 8  | 0,541294199 insertion seqs and phages               |
| Rv2533c | 10  | 10 | 0,546644602 information pathways                    |
| Rv1275  | 49  | 32 | 0,546644602 cell wall and cell processes            |
| Rv1616  | 10  | 10 | 0,546644602 cell wall and cell processes            |
| Rv1711  | 10  | 10 | 0,546644602 conserved hypotheticals                 |
| Rv2431c | 23  | 3  | 0,543989339 PE/PPE                                  |
| Rv3681c | 23  | 3  | 0,543989339 regulatory proteins                     |
| Rv3768  | 15  | 1  | 0,543362293 conserved hypotheticals                 |
| Rv0705  | 131 | 38 | 0,54315572 information pathways                     |
| Rv1130  | 19  | 2  | 0,560440888 intermediary metabolism and respiration |
| Rv3243c | 19  | 2  | 0,560440888 conserved hypotheticals                 |
| Rv1795  | 32  | 23 | 0,559436968 cell wall and cell processes            |
| Rv3233c | 3   | 5  | 0,560447269 lipid metabolism                        |
| Rv0764c | 3   | 5  | 0,560447269 intermediary metabolism and respiration |
| Rv2899c | 3   | 5  | 0,560447269 intermediary metabolism and respiration |
| Rv3013  | 3   | 5  | 0,560447269 conserved hypotheticals                 |
| Rv3282  | 3   | 5  | 0,560447269 conserved hypotheticals                 |
| Rv3771c | 3   | 5  | 0,560447269 conserved hypotheticals                 |
| Rv0060  | 33  | 6  | 0,559329212 conserved hypotheticals                 |
| Rv2753c | 60  | 14 | 0,562171304 intermediary metabolism and respiration |
| Rv2682c | 18  | 15 | 0,562340413 intermediary metabolism and respiration |
| Rv3118  | 18  | 15 | 0,562340413 intermediary metabolism and respiration |
| Rv2923c | 27  | 20 | 0,560739794 conserved hypotheticals                 |
| Rv3412  | 38  | 26 | 0,559995277 conserved hypotheticals                 |
| Rv0080  | 45  | 30 | 0,572857008 conserved hypotheticals                 |
| Rv0672  | 11  | 11 | 0,581715092 lipid metabolism                        |
| Rv1464  | 8   | 9  | 0,580730122 intermediary metabolism and respiration |
| Rv3704c | 8   | 9  | 0,580730122 intermediary metabolism and respiration |
| Rv2240c | 8   | 9  | 0,580730122 conserved hypotheticals                 |
| Rv3072c | 8   | 9  | 0,580730122 conserved hypotheticals                 |
| Rv0903c | 46  | 10 | 0,576529271 regulatory proteins                     |

|         |     |    |                                                     |
|---------|-----|----|-----------------------------------------------------|
| Rv3872  | 77  | 20 | 0,583571192 PE/PPE                                  |
| Rv0108c | 53  | 34 | 0,589785685 conserved hypotheticals                 |
| Rv2162c | 62  | 15 | 0,600859396 PE/PPE                                  |
| Rv3867  | 15  | 13 | 0,605323092 cell wall and cell processes            |
| Rv3042c | 15  | 13 | 0,605323092 intermediary metabolism and respiration |
| Rv0289  | 191 | 60 | 0,60418984 cell wall and cell processes             |
| Rv0701  | 87  | 51 | 0,605653693 information pathways                    |
| Rv3220c | 24  | 18 | 0,622605299 regulatory proteins                     |
| Rv0166  | 12  | 11 | 0,651505169 lipid metabolism                        |
| Rv1013  | 12  | 11 | 0,651505169 lipid metabolism                        |
| Rv0100  | 2   | 4  | 0,649807842 conserved hypotheticals                 |
| Rv0323c | 2   | 4  | 0,649807842 conserved hypotheticals                 |
| Rv1116A | 2   | 4  | 0,649807842 conserved hypotheticals                 |
| Rv2762c | 2   | 4  | 0,649807842 conserved hypotheticals                 |
| Rv2687c | 9   | 0  | 0,645674578 cell wall and cell processes            |
| Rv1221  | 43  | 9  | 0,647031255 information pathways                    |
| Rv1533  | 25  | 19 | 0,649061252 conserved hypotheticals                 |
| Rv0139  | 6   | 7  | 0,654663359 intermediary metabolism and respiration |
| Rv1241  | 25  | 4  | 0,658795088 virulence, detoxification, adaptation   |
| Rv2504c | 25  | 4  | 0,658795088 lipid metabolism                        |
| Rv0265c | 25  | 4  | 0,658795088 cell wall and cell processes            |
| Rv0559c | 25  | 4  | 0,658795088 cell wall and cell processes            |
| Rv1152  | 25  | 4  | 0,658795088 regulatory proteins                     |
| Rv2200c | 50  | 32 | 0,653870618 intermediary metabolism and respiration |
| Rv0472c | 26  | 4  | 0,659578805 regulatory proteins                     |
| Rv0724  | 31  | 22 | 0,659072538 cell wall and cell processes            |
| Rv0432  | 9   | 9  | 0,660374856 virulence, detoxification, adaptation   |
| Rv1302  | 9   | 9  | 0,660374856 cell wall and cell processes            |
| Rv3904c | 9   | 9  | 0,660374856 cell wall and cell processes            |
| Rv3753c | 9   | 9  | 0,660374856 conserved hypotheticals                 |
| Rv3920c | 176 | 93 | 0,66534579 conserved hypotheticals                  |
| Rv1596  | 51  | 12 | 0,687720684 intermediary metabolism and respiration |
| Rv0308  | 52  | 12 | 0,69083389 cell wall and cell processes             |
| Rv2867c | 17  | 14 | 0,693278523 intermediary metabolism and respiration |



|         |    |    |                                                     |
|---------|----|----|-----------------------------------------------------|
| Rv3767c | 4  | 6  | 0,692810813 lipid metabolism                        |
| Rv0254c | 4  | 6  | 0,692810813 intermediary metabolism and respiration |
| Rv1684  | 4  | 6  | 0,692810813 conserved hypotheticals                 |
| Rv2744c | 96 | 27 | 0,694584323 conserved hypotheticals                 |
| Rv1234  | 21 | 3  | 0,696069531 cell wall and cell processes            |
| Rv0293c | 21 | 3  | 0,696069531 conserved hypotheticals                 |
| Rv3119  | 45 | 10 | 0,698282505 intermediary metabolism and respiration |
| Rv3678A | 78 | 46 | 0,698282505 conserved hypotheticals                 |
| Rv0668  | 53 | 33 | 0,700478994 information pathways                    |
| Rv1557  | 1  | 3  | 0,733523494 cell wall and cell processes            |
| Rv2113  | 1  | 3  | 0,733523494 cell wall and cell processes            |
| Rv1530  | 1  | 3  | 0,733523494 intermediary metabolism and respiration |
| Rv1032c | 1  | 3  | 0,733523494 regulatory proteins                     |
| Rv3169  | 1  | 3  | 0,733523494 conserved hypotheticals                 |
| Rv3860  | 1  | 3  | 0,733523494 conserved hypotheticals                 |
| Rv2412  | 17 | 2  | 0,727436618 information pathways                    |
| Rv1625c | 17 | 2  | 0,727436618 intermediary metabolism and respiration |
| Rv2021c | 17 | 2  | 0,727436618 regulatory proteins                     |
| Rv1540  | 17 | 2  | 0,727436618 conserved hypotheticals                 |
| Rv2165c | 13 | 1  | 0,722850073 conserved hypotheticals                 |
| Rv3098c | 13 | 1  | 0,722850073 conserved hypotheticals                 |
| Rv2550c | 54 | 13 | 0,728868509 virulence, detoxification, adaptation   |
| Rv2829c | 18 | 2  | 0,738694446 virulence, detoxification, adaptation   |
| Rv1994c | 18 | 2  | 0,738694446 regulatory proteins                     |
| Rv1162  | 23 | 17 | 0,736470778 intermediary metabolism and respiration |
| Rv3725  | 18 | 14 | 0,738092347 intermediary metabolism and respiration |
| Rv0730  | 14 | 12 | 0,737744324 intermediary metabolism and respiration |
| Rv3149  | 14 | 12 | 0,737744324 intermediary metabolism and respiration |
| Rv1829  | 14 | 12 | 0,737744324 conserved hypotheticals                 |
| Rv1424c | 14 | 1  | 0,744520502 cell wall and cell processes            |
| Rv1892  | 14 | 1  | 0,744520502 cell wall and cell processes            |
| Rv1808  | 14 | 1  | 0,744520502 PE/PPE                                  |
| Rv1405c | 14 | 1  | 0,744520502 intermediary metabolism and respiration |
| Rv3093c | 14 | 1  | 0,744520502 intermediary metabolism and respiration |

|         |     |    |                                                     |
|---------|-----|----|-----------------------------------------------------|
| Rv1592c | 14  | 1  | 0,744520502 conserved hypotheticals                 |
| Rv0872c | 48  | 11 | 0,749336418 PE/PPE                                  |
| Rv0020c | 48  | 11 | 0,749336418 regulatory proteins                     |
| Rv1305  | 150 | 47 | 0,750452226 intermediary metabolism and respiration |
| Rv2048c | 29  | 20 | 0,750351887 lipid metabolism                        |
| Rv0462  | 41  | 9  | 0,762375246 intermediary metabolism and respiration |
| Rv2198c | 35  | 7  | 0,773572759 cell wall and cell processes            |
| Rv3770B | 11  | 10 | 0,789684982 insertion seqs and phages               |
| Rv3858c | 25  | 18 | 0,80522021 intermediary metabolism and respiration  |
| Rv1630  | 52  | 32 | 0,807536643 information pathways                    |
| Rv0120c | 5   | 6  | 0,810536649 information pathways                    |
| Rv3827c | 5   | 6  | 0,810536649 insertion seqs and phages               |
| Rv1442  | 5   | 6  | 0,810536649 intermediary metabolism and respiration |
| Rv3569c | 5   | 6  | 0,810536649 intermediary metabolism and respiration |
| Rv3713  | 5   | 6  | 0,810536649 intermediary metabolism and respiration |
| Rv1167c | 5   | 6  | 0,810536649 regulatory proteins                     |
| Rv0801  | 5   | 6  | 0,810536649 conserved hypotheticals                 |
| Rv2219A | 15  | 12 | 0,801437621 cell wall and cell processes            |
| Rv0384c | 24  | 4  | 0,821886506 virulence, detoxification, adaptation   |
| Rv2097c | 24  | 4  | 0,821886506 intermediary metabolism and respiration |
| Rv2495c | 8   | 8  | 0,819151973 intermediary metabolism and respiration |
| Rv0690c | 8   | 8  | 0,819151973 conserved hypotheticals                 |
| Rv2455c | 59  | 15 | 0,81897665 intermediary metabolism and respiration  |
| Rv4003  | 67  | 18 | 0,818847167 NA                                      |
| Rv1440  | 26  | 18 | 0,843108348 cell wall and cell processes            |
| Rv1300  | 26  | 18 | 0,843108348 intermediary metabolism and respiration |
| Rv3526  | 31  | 6  | 0,863795925 intermediary metabolism and respiration |
| Rv0885  | 31  | 6  | 0,863795925 conserved hypotheticals                 |
| Rv2500c | 52  | 13 | 0,863387479 lipid metabolism                        |
| Rv0476  | 81  | 23 | 0,895402027 cell wall and cell processes            |
| Rv1535  | 86  | 48 | 0,899739966 conserved hypotheticals                 |
| Rv0505c | 20  | 3  | 0,903229293 intermediary metabolism and respiration |
| Rv3007c | 20  | 3  | 0,903229293 intermediary metabolism and respiration |
| Rv0871  | 17  | 13 | 0,906016779 virulence, detoxification, adaptation   |

|         |     |    |                                                     |
|---------|-----|----|-----------------------------------------------------|
| Rv2229c | 17  | 13 | 0,906016779 conserved hypotheticals                 |
| Rv2327  | 17  | 13 | 0,906016779 conserved hypotheticals                 |
| Rv2785c | 73  | 20 | 0,913884808 information pathways                    |
| Rv1388  | 158 | 51 | 0,918967 information pathways                       |
| Rv2247  | 42  | 26 | 0,925680865 lipid metabolism                        |
| Rv0177  | 55  | 14 | 0,925680865 conserved hypotheticals                 |
| Rv2871  | 7   | 0  | 0,93246932 virulence, detoxification, adaptation    |
| Rv2560  | 7   | 0  | 0,93246932 cell wall and cell processes             |
| Rv1572c | 7   | 0  | 0,93246932 insertion seqs and phages                |
| Rv1169c | 7   | 0  | 0,93246932 PE/PPE                                   |
| Rv2034  | 7   | 0  | 0,93246932 regulatory proteins                      |
| Rv0311  | 7   | 0  | 0,93246932 conserved hypotheticals                  |
| Rv1593c | 39  | 9  | 0,931417077 conserved hypotheticals                 |
| Rv3357  | 8   | 0  | 0,935575082 virulence, detoxification, adaptation   |
| Rv0940c | 8   | 0  | 0,935575082 intermediary metabolism and respiration |
| Rv2029c | 8   | 0  | 0,935575082 intermediary metabolism and respiration |
| Rv1644  | 36  | 23 | 0,941502447 information pathways                    |
| Rv1472  | 26  | 5  | 0,944810098 lipid metabolism                        |
| Rv1544  | 9   | 8  | 0,944810098 lipid metabolism                        |
| Rv2612c | 9   | 8  | 0,944810098 lipid metabolism                        |
| Rv1009  | 9   | 8  | 0,944810098 cell wall and cell processes            |
| Rv2968c | 9   | 8  | 0,944810098 cell wall and cell processes            |
| Rv1465  | 9   | 8  | 0,944810098 intermediary metabolism and respiration |
| Rv0232  | 26  | 5  | 0,944810098 regulatory proteins                     |
| Rv1404  | 26  | 5  | 0,944810098 regulatory proteins                     |
| Rv1019  | 33  | 7  | 0,939826367 regulatory proteins                     |
| Rv0898c | 33  | 7  | 0,939826367 conserved hypotheticals                 |
| Rv0586  | 27  | 5  | 0,942371474 regulatory proteins                     |
| Rv1839c | 16  | 2  | 0,94641216 virulence, detoxification, adaptation    |
| Rv0687  | 16  | 2  | 0,94641216 intermediary metabolism and respiration  |
| Rv0781  | 16  | 2  | 0,94641216 intermediary metabolism and respiration  |
| Rv3502c | 16  | 2  | 0,94641216 intermediary metabolism and respiration  |
| Rv3132c | 16  | 2  | 0,94641216 regulatory proteins                      |
| Rv0883c | 16  | 2  | 0,94641216 conserved hypotheticals                  |

|         |    |    |                                                     |
|---------|----|----|-----------------------------------------------------|
| Rv3924c | 49 | 12 | 0,950759746 information pathways                    |
| Rv1650  | 6  | 6  | 0,976690506 information pathways                    |
| Rv3566c | 6  | 6  | 0,976690506 intermediary metabolism and respiration |
| Rv0804  | 6  | 6  | 0,976690506 conserved hypotheticals                 |
| Rv0955  | 14 | 11 | 0,975977008 cell wall and cell processes            |
| Rv2172c | 14 | 11 | 0,975977008 conserved hypotheticals                 |
| Rv2933  | 12 | 1  | 0,978356672 lipid metabolism                        |
| Rv0048c | 12 | 1  | 0,978356672 cell wall and cell processes            |
| Rv1446c | 12 | 1  | 0,978356672 intermediary metabolism and respiration |
| Rv1417  | 10 | 9  | 0,983059375 cell wall and cell processes            |
| Rv3570c | 10 | 9  | 0,983059375 intermediary metabolism and respiration |
| Rv1321  | 10 | 9  | 0,983059375 conserved hypotheticals                 |
| Rv1887  | 31 | 20 | 0,983059375 conserved hypotheticals                 |
| Rv0831c | 35 | 8  | 1,027724224 conserved hypotheticals                 |
| Rv1876  | 22 | 4  | 1,035347597 intermediary metabolism and respiration |
| Rv2470  | 22 | 4  | 1,035347597 intermediary metabolism and respiration |
| Rv0495c | 22 | 4  | 1,035347597 conserved hypotheticals                 |
| Rv3627c | 22 | 4  | 1,035347597 conserved hypotheticals                 |
| Rv2289  | 4  | 5  | 1,034309707 lipid metabolism                        |
| Rv0435c | 4  | 5  | 1,034309707 cell wall and cell processes            |
| Rv2456c | 4  | 5  | 1,034309707 cell wall and cell processes            |
| Rv3479  | 4  | 5  | 1,034309707 cell wall and cell processes            |
| Rv2591  | 4  | 5  | 1,034309707 PE/PPE                                  |
| Rv0422c | 4  | 5  | 1,034309707 intermediary metabolism and respiration |
| Rv3702c | 4  | 5  | 1,034309707 conserved hypotheticals                 |
| Rv2194  | 82 | 24 | 1,026293598 intermediary metabolism and respiration |
| Rv0525  | 20 | 14 | 1,026293598 conserved hypotheticals                 |
| Rv2507  | 23 | 4  | 1,031455927 cell wall and cell processes            |
| Rv1168c | 23 | 4  | 1,031455927 PE/PPE                                  |
| Rv3824c | 7  | 7  | 1,031332727 lipid metabolism                        |
| Rv3914  | 7  | 7  | 1,031332727 intermediary metabolism and respiration |
| Rv2358  | 29 | 6  | 1,031332727 regulatory proteins                     |
| Rv3249c | 7  | 7  | 1,031332727 regulatory proteins                     |
| Rv1232c | 29 | 6  | 1,031332727 conserved hypotheticals                 |

|         |     |    |                                                     |
|---------|-----|----|-----------------------------------------------------|
| Rv2752c | 7   | 7  | 1,031332727 conserved hypotheticals                 |
| Rv3284  | 7   | 7  | 1,031332727 conserved hypotheticals                 |
| Rv3148  | 27  | 18 | 1,041305547 intermediary metabolism and respiration |
| Rv0281  | 45  | 11 | 1,047904491 lipid metabolism                        |
| Rv0611c | 21  | 15 | 1,047819133 conserved hypotheticals                 |
| Rv2136c | 11  | 9  | 1,053649254 cell wall and cell processes            |
| Rv2799  | 11  | 9  | 1,053649254 cell wall and cell processes            |
| Rv2130c | 11  | 9  | 1,053649254 intermediary metabolism and respiration |
| Rv0074  | 11  | 9  | 1,053649254 conserved hypotheticals                 |
| Rv3409c | 16  | 12 | 1,067241543 lipid metabolism                        |
| Rv0642c | 38  | 9  | 1,095751407 lipid metabolism                        |
| Rv2594c | 38  | 9  | 1,095751407 information pathways                    |
| Rv0952  | 38  | 9  | 1,095751407 intermediary metabolism and respiration |
| Rv0527  | 22  | 15 | 1,096017699 intermediary metabolism and respiration |
| Rv1223  | 46  | 12 | 1,111184389 intermediary metabolism and respiration |
| Rv0313  | 144 | 47 | 1,113921471 conserved hypotheticals                 |
| Rv2852c | 18  | 3  | 1,12392511 intermediary metabolism and respiration  |
| Rv3137  | 18  | 3  | 1,12392511 intermediary metabolism and respiration  |
| Rv0707  | 90  | 27 | 1,124260615 information pathways                    |
| Rv3281  | 67  | 19 | 1,126238304 lipid metabolism                        |
| Rv3371  | 2   | 3  | 1,128210219 lipid metabolism                        |
| Rv0735  | 2   | 3  | 1,128210219 information pathways                    |
| Rv1317c | 2   | 3  | 1,128210219 information pathways                    |
| Rv1642  | 78  | 23 | 1,128210219 information pathways                    |
| Rv0774c | 2   | 3  | 1,128210219 cell wall and cell processes            |
| Rv3070  | 2   | 3  | 1,128210219 cell wall and cell processes            |
| Rv3431c | 2   | 3  | 1,128210219 insertion seqs and phages               |
| Rv0373c | 2   | 3  | 1,128210219 intermediary metabolism and respiration |
| Rv2499c | 2   | 3  | 1,128210219 intermediary metabolism and respiration |
| Rv3315c | 2   | 3  | 1,128210219 intermediary metabolism and respiration |
| Rv3752c | 2   | 3  | 1,128210219 intermediary metabolism and respiration |
| Rv3762c | 2   | 3  | 1,128210219 intermediary metabolism and respiration |
| Rv0679c | 2   | 3  | 1,128210219 conserved hypotheticals                 |
| Rv1179c | 2   | 3  | 1,128210219 conserved hypotheticals                 |

|         |    |    |                                                     |
|---------|----|----|-----------------------------------------------------|
| Rv2955c | 2  | 3  | 1,128210219 conserved hypotheticals                 |
| Rv3361c | 2  | 3  | 1,128210219 conserved hypotheticals                 |
| Rv3676  | 31 | 7  | 1,104579458 regulatory proteins                     |
| Rv3604c | 19 | 3  | 1,112885755 cell wall and cell processes            |
| Rv1017c | 19 | 3  | 1,112885755 intermediary metabolism and respiration |
| Rv3410c | 19 | 3  | 1,112885755 intermediary metabolism and respiration |
| Rv0857  | 19 | 3  | 1,112885755 conserved hypotheticals                 |
| Rv1915  | 32 | 7  | 1,110790652 intermediary metabolism and respiration |
| Rv1545  | 30 | 19 | 1,118328713 conserved hypotheticals                 |
| Rv0969  | 8  | 7  | 1,118148588 cell wall and cell processes            |
| Rv1634  | 8  | 7  | 1,118148588 cell wall and cell processes            |
| Rv3360  | 8  | 7  | 1,118148588 conserved hypotheticals                 |
| Rv3734c | 18 | 13 | 1,154539803 lipid metabolism                        |
| Rv1627c | 13 | 10 | 1,173096067 lipid metabolism                        |
| Rv0570  | 13 | 10 | 1,173096067 information pathways                    |
| Rv1340  | 13 | 10 | 1,173096067 information pathways                    |
| Rv3598c | 13 | 10 | 1,173096067 information pathways                    |
| Rv0346c | 13 | 10 | 1,173096067 cell wall and cell processes            |
| Rv1155  | 13 | 10 | 1,173096067 intermediary metabolism and respiration |
| Rv1416  | 13 | 10 | 1,173096067 intermediary metabolism and respiration |
| Rv2313c | 13 | 10 | 1,173096067 conserved hypotheticals                 |
| Rv0460  | 32 | 20 | 1,174510833 conserved hypotheticals                 |
| Rv0170  | 61 | 17 | 1,174943135 virulence, detoxification, adaptation   |
| Rv2103c | 5  | 5  | 1,177432687 virulence, detoxification, adaptation   |
| Rv3661  | 5  | 5  | 1,177432687 virulence, detoxification, adaptation   |
| Rv3024c | 5  | 5  | 1,177432687 information pathways                    |
| Rv0107c | 5  | 5  | 1,177432687 cell wall and cell processes            |
| Rv1491c | 5  | 5  | 1,177432687 cell wall and cell processes            |
| Rv1624c | 5  | 5  | 1,177432687 cell wall and cell processes            |
| Rv2637  | 5  | 5  | 1,177432687 cell wall and cell processes            |
| Rv1848  | 5  | 5  | 1,177432687 intermediary metabolism and respiration |
| Rv2855  | 5  | 5  | 1,177432687 intermediary metabolism and respiration |
| Rv3199c | 5  | 5  | 1,177432687 intermediary metabolism and respiration |
| Rv3216  | 5  | 5  | 1,177432687 intermediary metabolism and respiration |

|         |     |    |                                                     |
|---------|-----|----|-----------------------------------------------------|
| Rv1151c | 5   | 5  | 1,177432687 regulatory proteins                     |
| Rv3692  | 5   | 5  | 1,177432687 regulatory proteins                     |
| Rv0138  | 5   | 5  | 1,177432687 conserved hypotheticals                 |
| Rv2067c | 5   | 5  | 1,177432687 conserved hypotheticals                 |
| Rv3600c | 5   | 5  | 1,177432687 conserved hypotheticals                 |
| Rv3813c | 5   | 5  | 1,177432687 conserved hypotheticals                 |
| Rv1886c | 34  | 8  | 1,173809743 lipid metabolism                        |
| Rv3536c | 14  | 2  | 1,173809743 intermediary metabolism and respiration |
| Rv0163  | 14  | 2  | 1,173809743 conserved hypotheticals                 |
| Rv0750  | 14  | 2  | 1,173809743 conserved hypotheticals                 |
| Rv1196  | 195 | 67 | 1,168157201 PE/PPE                                  |
| Rv3868  | 19  | 13 | 1,173911559 cell wall and cell processes            |
| Rv1643  | 61  | 34 | 1,182310336 information pathways                    |
| Rv3442c | 42  | 11 | 1,182717694 information pathways                    |
| Rv2182c | 42  | 11 | 1,182717694 conserved hypotheticals                 |
| Rv2145c | 43  | 11 | 1,181542246 cell wall and cell processes            |
| Rv3864  | 43  | 11 | 1,181542246 cell wall and cell processes            |
| Rv3869  | 43  | 11 | 1,181542246 cell wall and cell processes            |
| Rv0761c | 26  | 17 | 1,183418908 intermediary metabolism and respiration |
| Rv1080c | 63  | 18 | 1,183821543 information pathways                    |
| Rv1608c | 15  | 2  | 1,184223108 virulence, detoxification, adaptation   |
| Rv0489  | 15  | 2  | 1,184223108 intermediary metabolism and respiration |
| Rv3059  | 15  | 2  | 1,184223108 intermediary metabolism and respiration |
| Rv3155  | 15  | 2  | 1,184223108 intermediary metabolism and respiration |
| Rv3535c | 15  | 2  | 1,184223108 intermediary metabolism and respiration |
| Rv3902c | 15  | 2  | 1,184223108 conserved hypotheticals                 |
| Rv1306  | 62  | 35 | 1,178125165 intermediary metabolism and respiration |
| Rv2721c | 27  | 6  | 1,196782105 cell wall and cell processes            |
| Rv2713  | 43  | 25 | 1,207578187 intermediary metabolism and respiration |
| Rv0157  | 28  | 6  | 1,209894226 intermediary metabolism and respiration |
| Rv2603c | 28  | 6  | 1,209894226 conserved hypotheticals                 |
| Rv3893c | 14  | 10 | 1,20996911 PE/PPE                                   |
| Rv2409c | 14  | 10 | 1,20996911 conserved hypotheticals                  |
| Rv0005  | 27  | 17 | 1,213924021 information pathways                    |

|         |    |    |                                                     |
|---------|----|----|-----------------------------------------------------|
| Rv2448c | 21 | 4  | 1,213924021 information pathways                    |
| Rv0847  | 27 | 17 | 1,213924021 cell wall and cell processes            |
| Rv1092c | 21 | 4  | 1,213924021 intermediary metabolism and respiration |
| Rv0158  | 21 | 4  | 1,213924021 regulatory proteins                     |
| Rv3458c | 76 | 41 | 1,207336706 information pathways                    |
| Rv0855  | 6  | 0  | 1,216040155 lipid metabolism                        |
| Rv1920  | 6  | 0  | 1,216040155 cell wall and cell processes            |
| Rv2980  | 6  | 0  | 1,216040155 cell wall and cell processes            |
| Rv3760  | 6  | 0  | 1,216040155 cell wall and cell processes            |
| Rv0156  | 6  | 0  | 1,216040155 intermediary metabolism and respiration |
| Rv0880  | 6  | 0  | 1,216040155 regulatory proteins                     |
| Rv1149  | 65 | 36 | 1,207935476 insertion seqs and phages               |
| Rv2102  | 36 | 9  | 1,221011553 conserved hypotheticals                 |
| Rv3499c | 10 | 1  | 1,223256923 virulence, detoxification, adaptation   |
| Rv3500c | 10 | 1  | 1,223256923 virulence, detoxification, adaptation   |
| Rv2937  | 10 | 1  | 1,223256923 cell wall and cell processes            |
| Rv3325  | 10 | 1  | 1,223256923 insertion seqs and phages               |
| Rv0799c | 10 | 1  | 1,223256923 conserved hypotheticals                 |
| Rv0941c | 10 | 1  | 1,223256923 conserved hypotheticals                 |
| Rv1728c | 10 | 1  | 1,223256923 conserved hypotheticals                 |
| Rv3457c | 36 | 22 | 1,219300889 information pathways                    |
| Rv2156c | 21 | 14 | 1,219010914 cell wall and cell processes            |
| Rv2704  | 15 | 11 | 1,221233207 conserved hypotheticals                 |
| Rv0813c | 10 | 8  | 1,223449873 conserved hypotheticals                 |
| Rv0787A | 93 | 29 | 1,228792415 conserved hypotheticals                 |
| Rv3285  | 37 | 22 | 1,244755051 lipid metabolism                        |
| Rv0239  | 57 | 32 | 1,250681967 virulence, detoxification, adaptation   |
| Rv1982c | 11 | 1  | 1,252226448 virulence, detoxification, adaptation   |
| Rv1227c | 11 | 1  | 1,252226448 cell wall and cell processes            |
| Rv1577c | 11 | 1  | 1,252226448 insertion seqs and phages               |
| Rv2642  | 11 | 1  | 1,252226448 regulatory proteins                     |
| Rv0140  | 11 | 1  | 1,252226448 conserved hypotheticals                 |
| Rv0965c | 11 | 1  | 1,252226448 conserved hypotheticals                 |
| Rv1539  | 81 | 25 | 1,24902725 cell wall and cell processes             |



|         |     |    |                                                     |
|---------|-----|----|-----------------------------------------------------|
| Rv1827  | 243 | 86 | 1,257982022 conserved hypotheticals                 |
| Rv0719  | 143 | 48 | 1,260737406 information pathways                    |
| Rv3411c | 47  | 13 | 1,262252055 intermediary metabolism and respiration |
| Rv0277c | 3   | 4  | 1,269308458 virulence, detoxification, adaptation   |
| Rv1942c | 3   | 4  | 1,269308458 virulence, detoxification, adaptation   |
| Rv0099  | 3   | 4  | 1,269308458 lipid metabolism                        |
| Rv0115  | 3   | 4  | 1,269308458 cell wall and cell processes            |
| Rv2600  | 3   | 4  | 1,269308458 cell wall and cell processes            |
| Rv0815c | 3   | 4  | 1,269308458 intermediary metabolism and respiration |
| Rv1393c | 3   | 4  | 1,269308458 intermediary metabolism and respiration |
| Rv1621c | 3   | 4  | 1,269308458 intermediary metabolism and respiration |
| Rv3308  | 3   | 4  | 1,269308458 intermediary metabolism and respiration |
| Rv0691c | 3   | 4  | 1,269308458 regulatory proteins                     |
| Rv3744  | 3   | 4  | 1,269308458 regulatory proteins                     |
| Rv0911  | 3   | 4  | 1,269308458 conserved hypotheticals                 |
| Rv2023c | 3   | 4  | 1,269308458 conserved hypotheticals                 |
| Rv2205c | 3   | 4  | 1,269308458 conserved hypotheticals                 |
| Rv3810  | 29  | 7  | 1,248795599 cell wall and cell processes            |
| Rv3711c | 30  | 7  | 1,247875702 information pathways                    |
| Rv0141c | 30  | 7  | 1,247875702 conserved hypotheticals                 |
| Rv0176  | 16  | 11 | 1,255697199 cell wall and cell processes            |
| Rv2536  | 16  | 11 | 1,255697199 cell wall and cell processes            |
| Rv0241c | 16  | 11 | 1,255697199 intermediary metabolism and respiration |
| Rv3596c | 98  | 51 | 1,252327913 intermediary metabolism and respiration |
| Rv1550  | 1   | 2  | 1,256214303 lipid metabolism                        |
| Rv0246  | 1   | 2  | 1,256214303 cell wall and cell processes            |
| Rv1910c | 1   | 2  | 1,256214303 cell wall and cell processes            |
| Rv2473  | 1   | 2  | 1,256214303 cell wall and cell processes            |
| Rv3390  | 1   | 2  | 1,256214303 cell wall and cell processes            |
| Rv1585c | 1   | 2  | 1,256214303 insertion seqs and phages               |
| Rv0816c | 1   | 2  | 1,256214303 intermediary metabolism and respiration |
| Rv3729  | 1   | 2  | 1,256214303 intermediary metabolism and respiration |
| Rv3160c | 1   | 2  | 1,256214303 regulatory proteins                     |
| Rv1045  | 1   | 2  | 1,256214303 conserved hypotheticals                 |

|         |    |    |                                                     |
|---------|----|----|-----------------------------------------------------|
| Rv2365c | 1  | 2  | 1,256214303 conserved hypotheticals                 |
| Rv2562  | 1  | 2  | 1,256214303 conserved hypotheticals                 |
| Rv2616  | 1  | 2  | 1,256214303 conserved hypotheticals                 |
| Rv2803  | 1  | 2  | 1,256214303 conserved hypotheticals                 |
| Rv2215  | 39 | 10 | 1,235842908 intermediary metabolism and respiration |
| Rv0821c | 49 | 28 | 1,24144881 cell wall and cell processes             |
| Rv1693  | 23 | 15 | 1,245863258 conserved hypotheticals                 |
| Rv0950c | 23 | 5  | 1,273801663 conserved hypotheticals                 |
| Rv2707  | 23 | 5  | 1,273801663 conserved hypotheticals                 |
| Rv2929  | 23 | 5  | 1,273801663 conserved hypotheticals                 |
| Rv0336  | 11 | 8  | 1,285108639 insertion seqs and phages               |
| Rv2979c | 11 | 8  | 1,285108639 insertion seqs and phages               |
| Rv1408  | 11 | 8  | 1,285108639 intermediary metabolism and respiration |
| Rv1508c | 17 | 3  | 1,284067453 cell wall and cell processes            |
| Rv2163c | 17 | 3  | 1,284067453 cell wall and cell processes            |
| Rv3619c | 17 | 3  | 1,284067453 cell wall and cell processes            |
| Rv0082  | 17 | 3  | 1,284067453 intermediary metabolism and respiration |
| Rv0147  | 24 | 5  | 1,284067453 intermediary metabolism and respiration |
| Rv1511  | 17 | 3  | 1,284067453 intermediary metabolism and respiration |
| Rv1816  | 17 | 3  | 1,284067453 regulatory proteins                     |
| Rv2788  | 17 | 3  | 1,284067453 regulatory proteins                     |
| Rv0025  | 17 | 3  | 1,284067453 conserved hypotheticals                 |
| Rv3122  | 24 | 5  | 1,284067453 conserved hypotheticals                 |
| Rv3900c | 17 | 3  | 1,284067453 conserved hypotheticals                 |
| Rv3806c | 24 | 15 | 1,277428405 cell wall and cell processes            |
| Rv2564  | 7  | 6  | 1,28631186 cell wall and cell processes             |
| Rv0948c | 7  | 6  | 1,28631186 intermediary metabolism and respiration  |
| Rv2537c | 7  | 6  | 1,28631186 intermediary metabolism and respiration  |
| Rv3518c | 7  | 6  | 1,28631186 intermediary metabolism and respiration  |
| Rv3684  | 7  | 6  | 1,28631186 intermediary metabolism and respiration  |
| Rv0470A | 7  | 6  | 1,28631186 conserved hypotheticals                  |
| Rv0695  | 7  | 6  | 1,28631186 conserved hypotheticals                  |
| Rv0856  | 7  | 6  | 1,28631186 conserved hypotheticals                  |
| Rv2369c | 7  | 6  | 1,28631186 conserved hypotheticals                  |

|         |     |    |                                                     |
|---------|-----|----|-----------------------------------------------------|
| Rv2414c | 7   | 6  | 1,28631186 conserved hypotheticals                  |
| Rv2426c | 7   | 6  | 1,28631186 conserved hypotheticals                  |
| Rv2551c | 7   | 6  | 1,28631186 conserved hypotheticals                  |
| Rv1488  | 41  | 11 | 1,273723394 cell wall and cell processes            |
| Rv1387  | 41  | 11 | 1,273723394 PE/PPE                                  |
| Rv2904c | 121 | 40 | 1,279310984 information pathways                    |
| Rv2969c | 32  | 8  | 1,280679771 cell wall and cell processes            |
| Rv3880c | 32  | 8  | 1,280679771 cell wall and cell processes            |
| Rv2996c | 32  | 8  | 1,280679771 intermediary metabolism and respiration |
| Rv1323  | 33  | 20 | 1,280253531 lipid metabolism                        |
| Rv2483c | 12  | 9  | 1,290632537 lipid metabolism                        |
| Rv0431  | 12  | 9  | 1,290632537 cell wall and cell processes            |
| Rv2790c | 12  | 9  | 1,290632537 cell wall and cell processes            |
| Rv0734  | 12  | 9  | 1,290632537 intermediary metabolism and respiration |
| Rv2061c | 12  | 9  | 1,290632537 conserved hypotheticals                 |
| Rv2990c | 12  | 9  | 1,290632537 conserved hypotheticals                 |
| Rv0054  | 33  | 8  | 1,28244226 information pathways                     |
| Rv3414c | 52  | 15 | 1,28244226 information pathways                     |
| Rv2780  | 33  | 8  | 1,28244226 intermediary metabolism and respiration  |
| Rv0487  | 33  | 8  | 1,28244226 conserved hypotheticals                  |
| Rv0058  | 18  | 12 | 1,278901012 information pathways                    |
| Rv2158c | 18  | 12 | 1,278901012 cell wall and cell processes            |
| Rv3520c | 18  | 12 | 1,278901012 intermediary metabolism and respiration |
| Rv1077  | 53  | 15 | 1,279598206 intermediary metabolism and respiration |
| Rv3221A | 67  | 36 | 1,300355655 information pathways                    |
| Rv0513  | 26  | 16 | 1,31109217 cell wall and cell processes             |
| Rv2109c | 26  | 16 | 1,31109217 intermediary metabolism and respiration  |
| Rv2846c | 80  | 25 | 1,319223661 cell wall and cell processes            |
| Rv0284  | 43  | 12 | 1,320514381 cell wall and cell processes            |
| Rv4005  | 25  | 6  | 1,345524053 NA                                      |
| Rv0861c | 26  | 6  | 1,346231591 information pathways                    |
| Rv2740  | 4   | 4  | 1,352442 virulence, detoxification, adaptation      |
| Rv3585  | 4   | 4  | 1,352442 information pathways                       |
| Rv0051  | 4   | 4  | 1,352442 cell wall and cell processes               |

|         |    |    |                                                     |
|---------|----|----|-----------------------------------------------------|
| Rv0658c | 4  | 4  | 1,352442 cell wall and cell processes               |
| Rv3346c | 4  | 4  | 1,352442 cell wall and cell processes               |
| Rv1054  | 4  | 4  | 1,352442 insertion seqs and phages                  |
| Rv1701  | 4  | 4  | 1,352442 insertion seqs and phages                  |
| Rv1106c | 4  | 4  | 1,352442 intermediary metabolism and respiration    |
| Rv1360  | 4  | 4  | 1,352442 intermediary metabolism and respiration    |
| Rv2066  | 4  | 4  | 1,352442 intermediary metabolism and respiration    |
| Rv2471  | 4  | 4  | 1,352442 intermediary metabolism and respiration    |
| Rv2966c | 4  | 4  | 1,352442 intermediary metabolism and respiration    |
| Rv3034c | 4  | 4  | 1,352442 intermediary metabolism and respiration    |
| Rv0210  | 4  | 4  | 1,352442 conserved hypotheticals                    |
| Rv2716  | 4  | 4  | 1,352442 conserved hypotheticals                    |
| Rv2717c | 4  | 4  | 1,352442 conserved hypotheticals                    |
| Rv3030  | 4  | 4  | 1,352442 conserved hypotheticals                    |
| Rv2421c | 35 | 9  | 1,331151145 intermediary metabolism and respiration |
| Rv1771  | 13 | 9  | 1,331320044 intermediary metabolism and respiration |
| Rv2335  | 13 | 9  | 1,331320044 intermediary metabolism and respiration |
| Rv3003c | 13 | 9  | 1,331320044 intermediary metabolism and respiration |
| Rv0760c | 13 | 9  | 1,331320044 conserved hypotheticals                 |
| Rv1590  | 13 | 9  | 1,331320044 conserved hypotheticals                 |
| Rv2325c | 13 | 9  | 1,331320044 conserved hypotheticals                 |
| Rv2587c | 20 | 13 | 1,344120996 cell wall and cell processes            |
| Rv2463  | 20 | 13 | 1,344120996 intermediary metabolism and respiration |
| Rv3151  | 20 | 13 | 1,344120996 intermediary metabolism and respiration |
| Rv0864  | 46 | 13 | 1,354200216 intermediary metabolism and respiration |
| Rv2214c | 19 | 4  | 1,369823707 virulence, detoxification, adaptation   |
| Rv0901  | 12 | 2  | 1,372082024 cell wall and cell processes            |
| Rv0988  | 12 | 2  | 1,372082024 cell wall and cell processes            |
| Rv2520c | 12 | 2  | 1,372082024 cell wall and cell processes            |
| Rv0834c | 12 | 2  | 1,372082024 PE/PPE                                  |
| Rv1001  | 12 | 2  | 1,372082024 intermediary metabolism and respiration |
| Rv2465c | 12 | 2  | 1,372082024 intermediary metabolism and respiration |
| Rv3316  | 12 | 2  | 1,372082024 intermediary metabolism and respiration |
| Rv1847  | 12 | 2  | 1,372082024 conserved hypotheticals                 |

|         |     |     |                                                     |
|---------|-----|-----|-----------------------------------------------------|
| Rv2248  | 12  | 2   | 1,372082024 conserved hypotheticals                 |
| Rv2525c | 12  | 2   | 1,372082024 conserved hypotheticals                 |
| Rv2998  | 12  | 2   | 1,372082024 conserved hypotheticals                 |
| Rv3209  | 12  | 2   | 1,372082024 conserved hypotheticals                 |
| Rv1566c | 13  | 2   | 1,355111158 virulence, detoxification, adaptation   |
| Rv2493  | 13  | 2   | 1,355111158 virulence, detoxification, adaptation   |
| Rv1071c | 13  | 2   | 1,355111158 lipid metabolism                        |
| Rv0411c | 13  | 2   | 1,355111158 cell wall and cell processes            |
| Rv0450c | 13  | 2   | 1,355111158 cell wall and cell processes            |
| Rv2617c | 13  | 2   | 1,355111158 cell wall and cell processes            |
| Rv2938  | 13  | 2   | 1,355111158 cell wall and cell processes            |
| Rv3277  | 13  | 2   | 1,355111158 cell wall and cell processes            |
| Rv2271  | 13  | 2   | 1,355111158 conserved hypotheticals                 |
| Rv3759c | 20  | 4   | 1,361046316 virulence, detoxification, adaptation   |
| Rv1070c | 20  | 4   | 1,361046316 lipid metabolism                        |
| Rv1015c | 20  | 4   | 1,361046316 information pathways                    |
| Rv1784  | 29  | 17  | 1,361046316 cell wall and cell processes            |
| Rv1854c | 20  | 4   | 1,361046316 intermediary metabolism and respiration |
| Rv3257c | 29  | 17  | 1,361046316 intermediary metabolism and respiration |
| Rv3699  | 20  | 4   | 1,361046316 conserved hypotheticals                 |
| Rv0390  | 21  | 13  | 1,360408777 conserved hypotheticals                 |
| Rv2468c | 21  | 13  | 1,360408777 conserved hypotheticals                 |
| Rv0057  | 60  | 18  | 1,359637956 conserved hypotheticals                 |
| Rv3092c | 37  | 10  | 1,359769792 cell wall and cell processes            |
| Rv2926c | 109 | 55  | 1,366602914 conserved hypotheticals                 |
| Rv0501  | 30  | 18  | 1,37342183 intermediary metabolism and respiration  |
| Rv1177  | 286 | 105 | 1,373024507 intermediary metabolism and respiration |
| Rv2497c | 28  | 7   | 1,376225311 intermediary metabolism and respiration |
| Rv0299  | 28  | 7   | 1,376225311 conserved hypotheticals                 |
| Rv2604c | 9   | 7   | 1,386196894 intermediary metabolism and respiration |
| Rv3815c | 9   | 7   | 1,386196894 intermediary metabolism and respiration |
| Rv3765c | 9   | 7   | 1,386196894 regulatory proteins                     |
| Rv1215c | 9   | 7   | 1,386196894 conserved hypotheticals                 |
| Rv2901c | 79  | 41  | 1,382012784 conserved hypotheticals                 |

|         |     |    |                                                     |
|---------|-----|----|-----------------------------------------------------|
| Rv3647c | 22  | 14 | 1,384671061 conserved hypotheticals                 |
| Rv2346c | 107 | 36 | 1,38834321 cell wall and cell processes             |
| Rv1418  | 15  | 10 | 1,392007811 cell wall and cell processes            |
| Rv2093c | 15  | 10 | 1,392007811 cell wall and cell processes            |
| Rv2743c | 15  | 10 | 1,392007811 cell wall and cell processes            |
| Rv1695  | 15  | 10 | 1,392007811 intermediary metabolism and respiration |
| Rv2977c | 15  | 10 | 1,392007811 intermediary metabolism and respiration |
| Rv3049c | 15  | 10 | 1,392007811 intermediary metabolism and respiration |
| Rv1209  | 31  | 18 | 1,386006742 conserved hypotheticals                 |
| Rv0896  | 66  | 35 | 1,38813102 intermediary metabolism and respiration  |
| Rv3150  | 23  | 14 | 1,415500714 intermediary metabolism and respiration |
| Rv3273  | 23  | 14 | 1,415500714 intermediary metabolism and respiration |
| Rv3153  | 40  | 11 | 1,41917233 intermediary metabolism and respiration  |
| Rv1307  | 33  | 19 | 1,443909756 intermediary metabolism and respiration |
| Rv1487  | 56  | 30 | 1,443449746 cell wall and cell processes            |
| Rv2104c | 21  | 5  | 1,458566126 virulence, detoxification, adaptation   |
| Rv3048c | 21  | 5  | 1,458566126 information pathways                    |
| Rv0249c | 30  | 8  | 1,458566126 intermediary metabolism and respiration |
| Rv1923  | 21  | 5  | 1,458566126 intermediary metabolism and respiration |
| Rv1332  | 30  | 8  | 1,458566126 regulatory proteins                     |
| Rv1520  | 22  | 5  | 1,454706357 intermediary metabolism and respiration |
| Rv3413c | 22  | 5  | 1,454706357 conserved hypotheticals                 |
| Rv0292  | 31  | 8  | 1,453772004 cell wall and cell processes            |
| Rv3459c | 99  | 33 | 1,463274044 information pathways                    |
| Rv1618  | 10  | 7  | 1,464790754 lipid metabolism                        |
| Rv0072  | 10  | 7  | 1,464790754 cell wall and cell processes            |
| Rv0425c | 10  | 7  | 1,464790754 cell wall and cell processes            |
| Rv1911c | 10  | 7  | 1,464790754 cell wall and cell processes            |
| Rv2772c | 10  | 7  | 1,464790754 cell wall and cell processes            |
| Rv0803  | 10  | 7  | 1,464790754 intermediary metabolism and respiration |
| Rv3710  | 10  | 7  | 1,464790754 intermediary metabolism and respiration |
| Rv0340  | 10  | 7  | 1,464790754 conserved hypotheticals                 |
| Rv0090  | 0   | 1  | 1,455083151 cell wall and cell processes            |
| Rv0420c | 0   | 1  | 1,455083151 cell wall and cell processes            |

|         |     |    |                                                     |
|---------|-----|----|-----------------------------------------------------|
| Rv2273  | 0   | 1  | 1,455083151 cell wall and cell processes            |
| Rv2646  | 0   | 1  | 1,455083151 insertion seqs and phages               |
| Rv3653  | 0   | 1  | 1,455083151 PE/PPE                                  |
| Rv0132c | 0   | 1  | 1,455083151 intermediary metabolism and respiration |
| Rv0770  | 0   | 1  | 1,455083151 intermediary metabolism and respiration |
| Rv1355c | 0   | 1  | 1,455083151 intermediary metabolism and respiration |
| Rv0396  | 0   | 1  | 1,455083151 conserved hypotheticals                 |
| Rv0406c | 0   | 1  | 1,455083151 conserved hypotheticals                 |
| Rv0724A | 0   | 1  | 1,455083151 conserved hypotheticals                 |
| Rv0725c | 0   | 1  | 1,455083151 conserved hypotheticals                 |
| Rv0807  | 0   | 1  | 1,455083151 conserved hypotheticals                 |
| Rv1137c | 0   | 1  | 1,455083151 conserved hypotheticals                 |
| Rv1203c | 0   | 1  | 1,455083151 conserved hypotheticals                 |
| Rv1414  | 0   | 1  | 1,455083151 conserved hypotheticals                 |
| Rv1439c | 0   | 1  | 1,455083151 conserved hypotheticals                 |
| Rv1669  | 0   | 1  | 1,455083151 conserved hypotheticals                 |
| Rv2044c | 0   | 1  | 1,455083151 conserved hypotheticals                 |
| Rv2811  | 0   | 1  | 1,455083151 conserved hypotheticals                 |
| Rv3218  | 0   | 1  | 1,455083151 conserved hypotheticals                 |
| Rv3354  | 0   | 1  | 1,455083151 conserved hypotheticals                 |
| Rv3845  | 0   | 1  | 1,455083151 conserved hypotheticals                 |
| Rv3295  | 34  | 19 | 1,427775634 regulatory proteins                     |
| Rv1793  | 191 | 91 | 1,428314898 cell wall and cell processes            |
| Rv0657c | 8   | 1  | 1,436563619 virulence, detoxification, adaptation   |
| Rv2527  | 8   | 1  | 1,436563619 virulence, detoxification, adaptation   |
| Rv3501c | 8   | 1  | 1,436563619 virulence, detoxification, adaptation   |
| Rv3546  | 8   | 1  | 1,436563619 lipid metabolism                        |
| Rv0235c | 8   | 1  | 1,436563619 cell wall and cell processes            |
| Rv1992c | 8   | 1  | 1,436563619 cell wall and cell processes            |
| Rv2164c | 8   | 1  | 1,436563619 cell wall and cell processes            |
| Rv2599  | 8   | 1  | 1,436563619 cell wall and cell processes            |
| Rv3102c | 8   | 1  | 1,436563619 cell wall and cell processes            |
| Rv3184  | 8   | 1  | 1,436563619 insertion seqs and phages               |
| Rv0547c | 8   | 1  | 1,436563619 intermediary metabolism and respiration |

|         |     |    |                                                     |
|---------|-----|----|-----------------------------------------------------|
| Rv1131  | 8   | 1  | 1,436563619 intermediary metabolism and respiration |
| Rv2750  | 8   | 1  | 1,436563619 intermediary metabolism and respiration |
| Rv3341  | 8   | 1  | 1,436563619 intermediary metabolism and respiration |
| Rv3534c | 8   | 1  | 1,436563619 intermediary metabolism and respiration |
| Rv0023  | 8   | 1  | 1,436563619 regulatory proteins                     |
| Rv0452  | 8   | 1  | 1,436563619 regulatory proteins                     |
| Rv0784  | 8   | 1  | 1,436563619 conserved hypotheticals                 |
| Rv2140c | 8   | 1  | 1,436563619 conserved hypotheticals                 |
| Rv2960c | 8   | 1  | 1,436563619 conserved hypotheticals                 |
| Rv3897c | 8   | 1  | 1,436563619 conserved hypotheticals                 |
| Rv4001  | 161 | 57 | 1,410166254 NA                                      |
| Rv0024  | 9   | 1  | 1,410710476 virulence, detoxification, adaptation   |
| Rv1956  | 9   | 1  | 1,410710476 virulence, detoxification, adaptation   |
| Rv3320c | 9   | 1  | 1,410710476 virulence, detoxification, adaptation   |
| Rv2934  | 9   | 1  | 1,410710476 lipid metabolism                        |
| Rv3761c | 9   | 1  | 1,410710476 lipid metabolism                        |
| Rv0928  | 9   | 1  | 1,410710476 cell wall and cell processes            |
| Rv1239c | 9   | 1  | 1,410710476 cell wall and cell processes            |
| Rv2864c | 9   | 1  | 1,410710476 cell wall and cell processes            |
| Rv3779  | 9   | 1  | 1,410710476 cell wall and cell processes            |
| Rv1578c | 9   | 1  | 1,410710476 insertion seqs and phages               |
| Rv1445c | 9   | 1  | 1,410710476 intermediary metabolism and respiration |
| Rv1601  | 9   | 1  | 1,410710476 intermediary metabolism and respiration |
| Rv2951c | 17  | 11 | 1,410710476 intermediary metabolism and respiration |
| Rv3078  | 9   | 1  | 1,410710476 intermediary metabolism and respiration |
| Rv1509  | 9   | 1  | 1,410710476 unknown                                 |
| Rv1052  | 9   | 1  | 1,410710476 conserved hypotheticals                 |
| Rv2619c | 9   | 1  | 1,410710476 conserved hypotheticals                 |
| Rv3863  | 9   | 1  | 1,410710476 conserved hypotheticals                 |
| Rv1078  | 86  | 28 | 1,408735768 conserved hypotheticals                 |
| Rv0664  | 15  | 3  | 1,419003555 virulence, detoxification, adaptation   |
| Rv0418  | 15  | 3  | 1,419003555 cell wall and cell processes            |
| Rv0497  | 15  | 3  | 1,419003555 cell wall and cell processes            |
| Rv1433  | 15  | 3  | 1,419003555 cell wall and cell processes            |



|         |     |    |                                                     |
|---------|-----|----|-----------------------------------------------------|
| Rv3632  | 15  | 3  | 1,419003555 cell wall and cell processes            |
| Rv2054  | 15  | 3  | 1,419003555 conserved hypotheticals                 |
| Rv3422c | 15  | 3  | 1,419003555 conserved hypotheticals                 |
| Rv3719  | 15  | 3  | 1,419003555 conserved hypotheticals                 |
| Rv3747  | 15  | 3  | 1,419003555 conserved hypotheticals                 |
| Rv0298  | 133 | 65 | 1,42691744 conserved hypotheticals                  |
| Rv0609  | 44  | 13 | 1,426972382 virulence, detoxification, adaptation   |
| Rv2783c | 44  | 13 | 1,426972382 information pathways                    |
| Rv0019c | 44  | 13 | 1,426972382 regulatory proteins                     |
| Rv1989c | 33  | 9  | 1,426972382 conserved hypotheticals                 |
| Rv0314c | 16  | 3  | 1,428563435 cell wall and cell processes            |
| Rv1037c | 16  | 3  | 1,428563435 cell wall and cell processes            |
| Rv3918c | 16  | 3  | 1,428563435 cell wall and cell processes            |
| Rv0755c | 16  | 3  | 1,428563435 PE/PPE                                  |
| Rv1676  | 16  | 3  | 1,428563435 conserved hypotheticals                 |
| Rv3811  | 16  | 3  | 1,428563435 conserved hypotheticals                 |
| Rv4010  | 49  | 26 | 1,426151515 NA                                      |
| Rv1192  | 18  | 11 | 1,425297615 conserved hypotheticals                 |
| Rv1925  | 90  | 30 | 1,438975802 lipid metabolism                        |
| Rv0146  | 6   | 5  | 1,446731319 lipid metabolism                        |
| Rv0673  | 6   | 5  | 1,446731319 lipid metabolism                        |
| Rv1696  | 6   | 5  | 1,446731319 information pathways                    |
| Rv0970  | 6   | 5  | 1,446731319 cell wall and cell processes            |
| Rv2922c | 6   | 5  | 1,446731319 cell wall and cell processes            |
| Rv3885c | 6   | 5  | 1,446731319 cell wall and cell processes            |
| Rv1988  | 6   | 5  | 1,446731319 intermediary metabolism and respiration |
| Rv2538c | 6   | 5  | 1,446731319 intermediary metabolism and respiration |
| Rv0192  | 6   | 5  | 1,446731319 conserved hypotheticals                 |
| Rv0421c | 6   | 5  | 1,446731319 conserved hypotheticals                 |
| Rv0433  | 6   | 5  | 1,446731319 conserved hypotheticals                 |
| Rv1775  | 6   | 5  | 1,446731319 conserved hypotheticals                 |
| Rv2469c | 6   | 5  | 1,446731319 conserved hypotheticals                 |
| Rv2522c | 6   | 5  | 1,446731319 conserved hypotheticals                 |
| Rv3717  | 6   | 5  | 1,446731319 conserved hypotheticals                 |

|         |    |    |                                                     |
|---------|----|----|-----------------------------------------------------|
| Rv0626  | 24 | 6  | 1,427575429 virulence, detoxification, adaptation   |
| Rv0167  | 28 | 16 | 1,443724368 virulence, detoxification, adaptation   |
| Rv2903c | 28 | 16 | 1,443724368 cell wall and cell processes            |
| Rv2077c | 19 | 12 | 1,443354595 cell wall and cell processes            |
| Rv3849  | 19 | 12 | 1,443354595 regulatory proteins                     |
| Rv3460c | 66 | 34 | 1,444322662 information pathways                    |
| Rv2530c | 4  | 0  | 1,456823181 virulence, detoxification, adaptation   |
| Rv3392c | 4  | 0  | 1,456823181 lipid metabolism                        |
| Rv3560c | 4  | 0  | 1,456823181 lipid metabolism                        |
| Rv0229c | 4  | 0  | 1,456823181 cell wall and cell processes            |
| Rv3476c | 4  | 0  | 1,456823181 cell wall and cell processes            |
| Rv2480c | 4  | 0  | 1,456823181 insertion seqs and phages               |
| Rv2658c | 4  | 0  | 1,456823181 insertion seqs and phages               |
| Rv1806  | 4  | 0  | 1,456823181 PE/PPE                                  |
| Rv0989c | 4  | 0  | 1,456823181 intermediary metabolism and respiration |
| Rv1011  | 4  | 0  | 1,456823181 intermediary metabolism and respiration |
| Rv3110  | 4  | 0  | 1,456823181 intermediary metabolism and respiration |
| Rv0196  | 4  | 0  | 1,456823181 regulatory proteins                     |
| Rv1049  | 4  | 0  | 1,456823181 regulatory proteins                     |
| Rv1219c | 4  | 0  | 1,456823181 regulatory proteins                     |
| Rv0825c | 4  | 0  | 1,456823181 conserved hypotheticals                 |
| Rv1366  | 4  | 0  | 1,456823181 conserved hypotheticals                 |
| Rv1571  | 4  | 0  | 1,456823181 conserved hypotheticals                 |
| Rv1835c | 4  | 0  | 1,456823181 conserved hypotheticals                 |
| Rv2078  | 4  | 0  | 1,456823181 conserved hypotheticals                 |
| Rv2514c | 4  | 0  | 1,456823181 conserved hypotheticals                 |
| Rv2559c | 4  | 0  | 1,456823181 conserved hypotheticals                 |
| Rv3081  | 4  | 0  | 1,456823181 conserved hypotheticals                 |
| Rv3486  | 4  | 0  | 1,456823181 conserved hypotheticals                 |
| Rv2610c | 12 | 8  | 1,431688556 lipid metabolism                        |
| Rv1164  | 12 | 8  | 1,431688556 intermediary metabolism and respiration |
| Rv1559  | 12 | 8  | 1,431688556 intermediary metabolism and respiration |
| Rv1605  | 12 | 8  | 1,431688556 intermediary metabolism and respiration |
| Rv3117  | 12 | 8  | 1,431688556 intermediary metabolism and respiration |

|         |     |    |                                                     |
|---------|-----|----|-----------------------------------------------------|
| Rv2295  | 12  | 8  | 1,431688556 conserved hypotheticals                 |
| Rv1906c | 35  | 10 | 1,429372154 conserved hypotheticals                 |
| Rv0451c | 5   | 0  | 1,43332266 cell wall and cell processes             |
| Rv1228  | 5   | 0  | 1,43332266 cell wall and cell processes             |
| Rv1362c | 5   | 0  | 1,43332266 cell wall and cell processes             |
| Rv2330c | 5   | 0  | 1,43332266 cell wall and cell processes             |
| Rv2698  | 5   | 0  | 1,43332266 cell wall and cell processes             |
| Rv2108  | 5   | 0  | 1,43332266 PE/PPE                                   |
| Rv2371  | 5   | 0  | 1,43332266 PE/PPE                                   |
| Rv3018c | 5   | 0  | 1,43332266 PE/PPE                                   |
| Rv0091  | 5   | 0  | 1,43332266 intermediary metabolism and respiration  |
| Rv0802c | 5   | 0  | 1,43332266 intermediary metabolism and respiration  |
| Rv3668c | 5   | 0  | 1,43332266 intermediary metabolism and respiration  |
| Rv1985c | 5   | 0  | 1,43332266 regulatory proteins                      |
| Rv0121c | 5   | 0  | 1,43332266 conserved hypotheticals                  |
| Rv2003c | 5   | 0  | 1,43332266 conserved hypotheticals                  |
| Rv4009  | 5   | 0  | 1,43332266 NA                                       |
| Rv3587c | 36  | 10 | 1,417323143 cell wall and cell processes            |
| Rv0496  | 36  | 10 | 1,417323143 conserved hypotheticals                 |
| Rv1863c | 20  | 12 | 1,426410345 cell wall and cell processes            |
| Rv1880c | 20  | 12 | 1,426410345 intermediary metabolism and respiration |
| Rv3726  | 20  | 12 | 1,426410345 intermediary metabolism and respiration |
| Rv0997  | 20  | 12 | 1,426410345 conserved hypotheticals                 |
| Rv0722  | 142 | 50 | 1,453854296 information pathways                    |
| Rv0935  | 56  | 29 | 1,457709185 cell wall and cell processes            |
| Rv2556c | 82  | 27 | 1,46113259 conserved hypotheticals                  |
| Rv2010  | 26  | 7  | 1,464550129 virulence, detoxification, adaptation   |
| Rv1783  | 26  | 7  | 1,464550129 cell wall and cell processes            |
| Rv0227c | 27  | 7  | 1,468824979 cell wall and cell processes            |
| Rv2444c | 31  | 17 | 1,470533504 information pathways                    |
| Rv3260c | 31  | 17 | 1,470533504 regulatory proteins                     |
| Rv3480c | 17  | 4  | 1,473096416 lipid metabolism                        |
| Rv1289  | 17  | 4  | 1,473096416 conserved hypotheticals                 |
| Rv1898  | 17  | 4  | 1,473096416 conserved hypotheticals                 |

|         |     |    |                                                     |
|---------|-----|----|-----------------------------------------------------|
| Rv0251c | 18  | 4  | 1,474394723 virulence, detoxification, adaptation   |
| Rv2886c | 18  | 4  | 1,474394723 insertion seqs and phages               |
| Rv1334  | 18  | 4  | 1,474394723 intermediary metabolism and respiration |
| Rv1856c | 18  | 4  | 1,474394723 intermediary metabolism and respiration |
| Rv1502  | 18  | 4  | 1,474394723 unknown                                 |
| Rv3099c | 18  | 4  | 1,474394723 conserved hypotheticals                 |
| Rv3141  | 7   | 5  | 1,482424725 lipid metabolism                        |
| Rv3204  | 7   | 5  | 1,482424725 information pathways                    |
| Rv1463  | 7   | 5  | 1,482424725 cell wall and cell processes            |
| Rv0500  | 7   | 5  | 1,482424725 intermediary metabolism and respiration |
| Rv2211c | 7   | 5  | 1,482424725 intermediary metabolism and respiration |
| Rv2084  | 7   | 5  | 1,482424725 unknown                                 |
| Rv0906  | 7   | 5  | 1,482424725 conserved hypotheticals                 |
| Rv1339  | 7   | 5  | 1,482424725 conserved hypotheticals                 |
| Rv2410c | 7   | 5  | 1,482424725 conserved hypotheticals                 |
| Rv3773c | 7   | 5  | 1,482424725 conserved hypotheticals                 |
| Rv2726c | 22  | 13 | 1,471641646 intermediary metabolism and respiration |
| Rv0717  | 174 | 63 | 1,472069463 information pathways                    |
| Rv1791  | 68  | 22 | 1,472911819 PE/PPE                                  |
| Rv0634B | 14  | 9  | 1,492423618 information pathways                    |
| Rv2446c | 14  | 9  | 1,492423618 cell wall and cell processes            |
| Rv2076c | 14  | 9  | 1,492423618 conserved hypotheticals                 |
| Rv3491  | 14  | 9  | 1,492423618 conserved hypotheticals                 |
| Rv0860  | 61  | 31 | 1,498192154 lipid metabolism                        |
| Rv3579c | 54  | 17 | 1,497768974 intermediary metabolism and respiration |
| Rv2302  | 54  | 17 | 1,497768974 conserved hypotheticals                 |
| Rv1293  | 41  | 12 | 1,507236969 intermediary metabolism and respiration |
| Rv3222c | 41  | 12 | 1,507236969 conserved hypotheticals                 |
| Rv2202c | 23  | 13 | 1,50884921 intermediary metabolism and respiration  |
| Rv2627c | 23  | 13 | 1,50884921 conserved hypotheticals                  |
| Rv2921c | 29  | 8  | 1,514567303 cell wall and cell processes            |
| Rv1173  | 63  | 32 | 1,514954561 intermediary metabolism and respiration |
| Rv0101  | 3   | 3  | 1,514109859 lipid metabolism                        |
| Rv0675  | 3   | 3  | 1,514109859 lipid metabolism                        |

|         |    |   |                                                     |
|---------|----|---|-----------------------------------------------------|
| Rv1346  | 3  | 3 | 1,514109859 lipid metabolism                        |
| Rv2679  | 3  | 3 | 1,514109859 lipid metabolism                        |
| Rv3328c | 3  | 3 | 1,514109859 information pathways                    |
| Rv0849  | 3  | 3 | 1,514109859 cell wall and cell processes            |
| Rv0875c | 3  | 3 | 1,514109859 cell wall and cell processes            |
| Rv1282c | 3  | 3 | 1,514109859 cell wall and cell processes            |
| Rv2856  | 3  | 3 | 1,514109859 cell wall and cell processes            |
| Rv3162c | 3  | 3 | 1,514109859 cell wall and cell processes            |
| Rv3298c | 3  | 3 | 1,514109859 cell wall and cell processes            |
| Rv3623  | 3  | 3 | 1,514109859 cell wall and cell processes            |
| Rv2657c | 3  | 3 | 1,514109859 insertion seqs and phages               |
| Rv0085  | 3  | 3 | 1,514109859 intermediary metabolism and respiration |
| Rv0223c | 3  | 3 | 1,514109859 intermediary metabolism and respiration |
| Rv0536  | 3  | 3 | 1,514109859 intermediary metabolism and respiration |
| Rv0711  | 3  | 3 | 1,514109859 intermediary metabolism and respiration |
| Rv1622c | 3  | 3 | 1,514109859 intermediary metabolism and respiration |
| Rv1853  | 3  | 3 | 1,514109859 intermediary metabolism and respiration |
| Rv2848c | 3  | 3 | 1,514109859 intermediary metabolism and respiration |
| Rv0348  | 3  | 3 | 1,514109859 regulatory proteins                     |
| Rv2989  | 3  | 3 | 1,514109859 regulatory proteins                     |
| Rv0552  | 3  | 3 | 1,514109859 conserved hypotheticals                 |
| Rv1864c | 3  | 3 | 1,514109859 conserved hypotheticals                 |
| Rv2189c | 3  | 3 | 1,514109859 conserved hypotheticals                 |
| Rv2819c | 3  | 3 | 1,514109859 conserved hypotheticals                 |
| Rv2822c | 3  | 3 | 1,514109859 conserved hypotheticals                 |
| Rv3040c | 3  | 3 | 1,514109859 conserved hypotheticals                 |
| Rv3292  | 3  | 3 | 1,514109859 conserved hypotheticals                 |
| Rv0126  | 11 | 2 | 1,478985437 virulence, detoxification, adaptation   |
| Rv0271c | 11 | 2 | 1,478985437 lipid metabolism                        |
| Rv2080  | 11 | 2 | 1,478985437 cell wall and cell processes            |
| Rv2345  | 11 | 2 | 1,478985437 cell wall and cell processes            |
| Rv3620c | 11 | 2 | 1,478985437 cell wall and cell processes            |
| Rv3878  | 11 | 2 | 1,478985437 cell wall and cell processes            |
| Rv0136  | 11 | 2 | 1,478985437 intermediary metabolism and respiration |

|         |     |     |                                                     |
|---------|-----|-----|-----------------------------------------------------|
| Rv0155  | 11  | 2   | 1,478985437 intermediary metabolism and respiration |
| Rv0407  | 11  | 2   | 1,478985437 intermediary metabolism and respiration |
| Rv1990A | 11  | 2   | 1,478985437 intermediary metabolism and respiration |
| Rv3545c | 11  | 2   | 1,478985437 intermediary metabolism and respiration |
| Rv1033c | 11  | 2   | 1,478985437 regulatory proteins                     |
| Rv2621c | 11  | 2   | 1,478985437 regulatory proteins                     |
| Rv1810  | 11  | 2   | 1,478985437 conserved hypotheticals                 |
| Rv3748  | 11  | 2   | 1,478985437 conserved hypotheticals                 |
| Rv3766  | 11  | 2   | 1,478985437 conserved hypotheticals                 |
| Rv2521  | 48  | 25  | 1,465228594 virulence, detoxification, adaptation   |
| Rv3919c | 48  | 25  | 1,465228594 cell wall and cell processes            |
| Rv1831  | 72  | 24  | 1,468027432 conserved hypotheticals                 |
| Rv0714  | 24  | 14  | 1,471989323 information pathways                    |
| Rv3890c | 56  | 18  | 1,473183917 cell wall and cell processes            |
| Rv3687c | 15  | 9   | 1,487776452 information pathways                    |
| Rv3823c | 15  | 9   | 1,487776452 cell wall and cell processes            |
| Rv1079  | 15  | 9   | 1,487776452 intermediary metabolism and respiration |
| Rv3025c | 15  | 9   | 1,487776452 intermediary metabolism and respiration |
| Rv2953  | 8   | 6   | 1,48344996 lipid metabolism                         |
| Rv2836c | 8   | 6   | 1,48344996 information pathways                     |
| Rv0011c | 8   | 6   | 1,48344996 cell wall and cell processes             |
| Rv2952  | 8   | 6   | 1,48344996 intermediary metabolism and respiration  |
| Rv2257c | 8   | 6   | 1,48344996 conserved hypotheticals                  |
| Rv3672c | 8   | 6   | 1,48344996 conserved hypotheticals                  |
| Rv3683  | 8   | 6   | 1,48344996 conserved hypotheticals                  |
| Rv3749c | 8   | 6   | 1,48344996 conserved hypotheticals                  |
| Rv2789c | 20  | 5   | 1,495569267 lipid metabolism                        |
| Rv3144c | 20  | 5   | 1,495569267 PE/PPE                                  |
| Rv3608c | 20  | 5   | 1,495569267 intermediary metabolism and respiration |
| Rv0466  | 20  | 5   | 1,495569267 conserved hypotheticals                 |
| Rv3755c | 20  | 5   | 1,495569267 conserved hypotheticals                 |
| Rv2703  | 37  | 20  | 1,49008854 information pathways                     |
| Rv2745c | 245 | 113 | 1,492028235 regulatory proteins                     |
| Rv0994  | 52  | 27  | 1,504059248 intermediary metabolism and respiration |

|         |    |    |                                                     |
|---------|----|----|-----------------------------------------------------|
| Rv2699c | 52 | 27 | 1,504059248 conserved hypotheticals                 |
| Rv3355c | 16 | 10 | 1,506357121 cell wall and cell processes            |
| Rv2720  | 16 | 10 | 1,506357121 regulatory proteins                     |
| Rv0342  | 31 | 9  | 1,505938594 cell wall and cell processes            |
| Rv3245c | 31 | 9  | 1,505938594 regulatory proteins                     |
| Rv0580c | 31 | 9  | 1,505938594 conserved hypotheticals                 |
| Rv0667  | 88 | 43 | 1,504347935 information pathways                    |
| Rv2947c | 98 | 34 | 1,506262928 lipid metabolism                        |
| Rv0702  | 53 | 27 | 1,513572296 information pathways                    |
| Rv0006  | 39 | 21 | 1,521640747 information pathways                    |
| Rv1595  | 39 | 21 | 1,521640747 intermediary metabolism and respiration |
| Rv1283c | 9  | 6  | 1,534278416 cell wall and cell processes            |
| Rv1368  | 9  | 6  | 1,534278416 cell wall and cell processes            |
| Rv3006  | 9  | 6  | 1,534278416 cell wall and cell processes            |
| Rv0208c | 9  | 6  | 1,534278416 intermediary metabolism and respiration |
| Rv0409  | 9  | 6  | 1,534278416 intermediary metabolism and respiration |
| Rv1844c | 9  | 6  | 1,534278416 intermediary metabolism and respiration |
| Rv2096c | 9  | 6  | 1,534278416 intermediary metabolism and respiration |
| Rv2425c | 9  | 6  | 1,534278416 conserved hypotheticals                 |
| Rv2680  | 9  | 6  | 1,534278416 conserved hypotheticals                 |
| Rv2930  | 17 | 10 | 1,532035004 lipid metabolism                        |
| Rv0202c | 17 | 10 | 1,532035004 cell wall and cell processes            |
| Rv3750c | 17 | 10 | 1,532035004 insertion seqs and phages               |
| Rv3038c | 17 | 10 | 1,532035004 conserved hypotheticals                 |
| Rv0172  | 33 | 10 | 1,556264258 virulence, detoxification, adaptation   |
| Rv3005c | 34 | 10 | 1,555449462 conserved hypotheticals                 |
| Rv1747  | 22 | 6  | 1,570604298 cell wall and cell processes            |
| Rv3238c | 22 | 6  | 1,570604298 cell wall and cell processes            |
| Rv1837c | 22 | 6  | 1,570604298 intermediary metabolism and respiration |
| Rv2043c | 22 | 6  | 1,570604298 intermediary metabolism and respiration |
| Rv2314c | 22 | 6  | 1,570604298 conserved hypotheticals                 |
| Rv2676c | 22 | 6  | 1,570604298 conserved hypotheticals                 |
| Rv0491  | 29 | 16 | 1,564162108 regulatory proteins                     |
| Rv3443c | 23 | 6  | 1,569775115 information pathways                    |

|         |    |    |                                                     |
|---------|----|----|-----------------------------------------------------|
| Rv1086  | 23 | 6  | 1,569775115 cell wall and cell processes            |
| Rv3645  | 23 | 6  | 1,569775115 cell wall and cell processes            |
| Rv1641  | 59 | 30 | 1,566943031 information pathways                    |
| Rv0475  | 79 | 39 | 1,579323135 cell wall and cell processes            |
| Rv1796  | 19 | 11 | 1,595451711 intermediary metabolism and respiration |
| Rv2291  | 19 | 11 | 1,595451711 intermediary metabolism and respiration |
| Rv1486c | 19 | 11 | 1,595451711 conserved hypotheticals                 |
| Rv1123c | 13 | 3  | 1,592196055 virulence, detoxification, adaptation   |
| Rv2581c | 13 | 3  | 1,592196055 virulence, detoxification, adaptation   |
| Rv2601A | 13 | 3  | 1,592196055 virulence, detoxification, adaptation   |
| Rv0645c | 13 | 3  | 1,592196055 lipid metabolism                        |
| Rv2931  | 13 | 3  | 1,592196055 lipid metabolism                        |
| Rv0413  | 13 | 3  | 1,592196055 information pathways                    |
| Rv0937c | 13 | 3  | 1,592196055 information pathways                    |
| Rv2736c | 13 | 3  | 1,592196055 information pathways                    |
| Rv0638  | 89 | 31 | 1,592196055 cell wall and cell processes            |
| Rv3876  | 13 | 3  | 1,592196055 cell wall and cell processes            |
| Rv0829  | 13 | 3  | 1,592196055 insertion seqs and phages               |
| Rv2359  | 13 | 3  | 1,592196055 regulatory proteins                     |
| Rv3058c | 13 | 3  | 1,592196055 regulatory proteins                     |
| Rv0268c | 13 | 3  | 1,592196055 conserved hypotheticals                 |
| Rv1100  | 13 | 3  | 1,592196055 conserved hypotheticals                 |
| Rv0154c | 14 | 3  | 1,581340585 lipid metabolism                        |
| Rv2357c | 14 | 3  | 1,581340585 information pathways                    |
| Rv2907c | 14 | 3  | 1,581340585 information pathways                    |
| Rv0017c | 14 | 3  | 1,581340585 cell wall and cell processes            |
| Rv1238  | 14 | 3  | 1,581340585 cell wall and cell processes            |
| Rv1984c | 14 | 3  | 1,581340585 cell wall and cell processes            |
| Rv3879c | 14 | 3  | 1,581340585 cell wall and cell processes            |
| Rv1187  | 14 | 3  | 1,581340585 intermediary metabolism and respiration |
| Rv0238  | 14 | 3  | 1,581340585 regulatory proteins                     |
| Rv0966c | 14 | 3  | 1,581340585 conserved hypotheticals                 |
| Rv1444c | 14 | 3  | 1,581340585 conserved hypotheticals                 |
| Rv2033c | 14 | 3  | 1,581340585 conserved hypotheticals                 |



|         |   |   |                                                    |
|---------|---|---|----------------------------------------------------|
| Rv3758c | 4 | 3 | 1,57496684 virulence, detoxification, adaptation   |
| Rv0752c | 4 | 3 | 1,57496684 lipid metabolism                        |
| Rv1206  | 4 | 3 | 1,57496684 lipid metabolism                        |
| Rv1345  | 4 | 3 | 1,57496684 lipid metabolism                        |
| Rv1661  | 4 | 3 | 1,57496684 lipid metabolism                        |
| Rv1822  | 4 | 3 | 1,57496684 lipid metabolism                        |
| Rv2262c | 4 | 3 | 1,57496684 lipid metabolism                        |
| Rv1165  | 4 | 3 | 1,57496684 information pathways                    |
| Rv2069  | 4 | 3 | 1,57496684 information pathways                    |
| Rv3198c | 4 | 3 | 1,57496684 information pathways                    |
| Rv1016c | 4 | 3 | 1,57496684 cell wall and cell processes            |
| Rv1139c | 4 | 3 | 1,57496684 cell wall and cell processes            |
| Rv1166  | 4 | 3 | 1,57496684 cell wall and cell processes            |
| Rv1456c | 4 | 3 | 1,57496684 cell wall and cell processes            |
| Rv1824  | 4 | 3 | 1,57496684 cell wall and cell processes            |
| Rv3437  | 4 | 3 | 1,57496684 cell wall and cell processes            |
| Rv0773c | 4 | 3 | 1,57496684 intermediary metabolism and respiration |
| Rv1485  | 4 | 3 | 1,57496684 intermediary metabolism and respiration |
| Rv1654  | 4 | 3 | 1,57496684 intermediary metabolism and respiration |
| Rv2212  | 4 | 3 | 1,57496684 intermediary metabolism and respiration |
| Rv2404c | 4 | 3 | 1,57496684 intermediary metabolism and respiration |
| Rv0165c | 4 | 3 | 1,57496684 regulatory proteins                     |
| Rv1474c | 4 | 3 | 1,57496684 regulatory proteins                     |
| Rv1931c | 4 | 3 | 1,57496684 regulatory proteins                     |
| Rv0263c | 4 | 3 | 1,57496684 conserved hypotheticals                 |
| Rv0464c | 4 | 3 | 1,57496684 conserved hypotheticals                 |
| Rv0579  | 4 | 3 | 1,57496684 conserved hypotheticals                 |
| Rv1003  | 4 | 3 | 1,57496684 conserved hypotheticals                 |
| Rv2237  | 4 | 3 | 1,57496684 conserved hypotheticals                 |
| Rv2331A | 4 | 3 | 1,57496684 conserved hypotheticals                 |
| Rv2738c | 4 | 3 | 1,57496684 conserved hypotheticals                 |
| Rv2915c | 4 | 3 | 1,57496684 conserved hypotheticals                 |
| Rv3362c | 4 | 3 | 1,57496684 conserved hypotheticals                 |
| Rv3484  | 4 | 3 | 1,57496684 conserved hypotheticals                 |

|         |    |    |                                                     |
|---------|----|----|-----------------------------------------------------|
| Rv3896c | 4  | 3  | 1,57496684 conserved hypotheticals                  |
| Rv3780  | 37 | 11 | 1,536816957 conserved hypotheticals                 |
| Rv0635  | 53 | 17 | 1,546465894 intermediary metabolism and respiration |
| Rv0502  | 32 | 17 | 1,557534732 conserved hypotheticals                 |
| Rv0463  | 20 | 11 | 1,56787115 cell wall and cell processes             |
| Rv0993  | 20 | 11 | 1,56787115 intermediary metabolism and respiration  |
| Rv2228c | 11 | 7  | 1,567037834 information pathways                    |
| Rv0514  | 11 | 7  | 1,567037834 cell wall and cell processes            |
| Rv2152c | 11 | 7  | 1,567037834 cell wall and cell processes            |
| Rv1826  | 11 | 7  | 1,567037834 intermediary metabolism and respiration |
| Rv2771c | 11 | 7  | 1,567037834 conserved hypotheticals                 |
| Rv1109c | 39 | 12 | 1,577082734 conserved hypotheticals                 |
| Rv2256c | 97 | 34 | 1,577373544 conserved hypotheticals                 |
| Rv1195  | 67 | 33 | 1,577308046 PE/PPE                                  |
| Rv1415  | 34 | 18 | 1,589689878 intermediary metabolism and respiration |
| Rv0590  | 7  | 1  | 1,600987805 virulence, detoxification, adaptation   |
| Rv1814  | 7  | 1  | 1,600987805 lipid metabolism                        |
| Rv1912c | 7  | 1  | 1,600987805 lipid metabolism                        |
| Rv2746c | 7  | 1  | 1,600987805 lipid metabolism                        |
| Rv2593c | 7  | 1  | 1,600987805 information pathways                    |
| Rv0113  | 7  | 1  | 1,600987805 cell wall and cell processes            |
| Rv0179c | 7  | 1  | 1,600987805 cell wall and cell processes            |
| Rv0633c | 7  | 1  | 1,600987805 cell wall and cell processes            |
| Rv0838  | 7  | 1  | 1,600987805 cell wall and cell processes            |
| Rv1672c | 7  | 1  | 1,600987805 cell wall and cell processes            |
| Rv2620c | 7  | 1  | 1,600987805 cell wall and cell processes            |
| Rv3851  | 7  | 1  | 1,600987805 cell wall and cell processes            |
| Rv2634c | 7  | 1  | 1,600987805 PE/PPE                                  |
| Rv1936  | 7  | 1  | 1,600987805 intermediary metabolism and respiration |
| Rv2231c | 7  | 1  | 1,600987805 intermediary metabolism and respiration |
| Rv2349c | 7  | 1  | 1,600987805 intermediary metabolism and respiration |
| Rv2747  | 7  | 1  | 1,600987805 intermediary metabolism and respiration |
| Rv3203  | 7  | 1  | 1,600987805 intermediary metabolism and respiration |
| Rv0792c | 7  | 1  | 1,600987805 regulatory proteins                     |

|         |    |    |                                                     |
|---------|----|----|-----------------------------------------------------|
| Rv2887  | 7  | 1  | 1,600987805 regulatory proteins                     |
| Rv3055  | 7  | 1  | 1,600987805 regulatory proteins                     |
| Rv0365c | 7  | 1  | 1,600987805 conserved hypotheticals                 |
| Rv1157c | 7  | 1  | 1,600987805 conserved hypotheticals                 |
| Rv1277  | 7  | 1  | 1,600987805 conserved hypotheticals                 |
| Rv1372  | 7  | 1  | 1,600987805 conserved hypotheticals                 |
| Rv2035  | 7  | 1  | 1,600987805 conserved hypotheticals                 |
| Rv2286c | 7  | 1  | 1,600987805 conserved hypotheticals                 |
| Rv2638  | 7  | 1  | 1,600987805 conserved hypotheticals                 |
| Rv3210c | 7  | 1  | 1,600987805 conserved hypotheticals                 |
| Rv3404c | 7  | 1  | 1,600987805 conserved hypotheticals                 |
| Rv2475c | 35 | 18 | 1,582566433 conserved hypotheticals                 |
| Rv3805c | 22 | 12 | 1,581803509 cell wall and cell processes            |
| Rv1751  | 22 | 12 | 1,581803509 intermediary metabolism and respiration |
| Rv3607c | 22 | 12 | 1,581803509 intermediary metabolism and respiration |
| Rv0073  | 41 | 13 | 1,583684174 cell wall and cell processes            |
| Rv1108c | 12 | 7  | 1,593322883 information pathways                    |
| Rv1638  | 12 | 7  | 1,593322883 information pathways                    |
| Rv3721c | 12 | 7  | 1,593322883 information pathways                    |
| Rv2609c | 12 | 7  | 1,593322883 cell wall and cell processes            |
| Rv0149  | 12 | 7  | 1,593322883 intermediary metabolism and respiration |
| Rv1229c | 12 | 7  | 1,593322883 intermediary metabolism and respiration |
| Rv1475c | 12 | 7  | 1,593322883 intermediary metabolism and respiration |
| Rv2454c | 12 | 7  | 1,593322883 intermediary metabolism and respiration |
| Rv2678c | 12 | 7  | 1,593322883 intermediary metabolism and respiration |
| Rv3624c | 12 | 7  | 1,593322883 intermediary metabolism and respiration |
| Rv0759c | 12 | 7  | 1,593322883 conserved hypotheticals                 |
| Rv2554c | 12 | 7  | 1,593322883 conserved hypotheticals                 |
| Rv3395c | 12 | 7  | 1,593322883 conserved hypotheticals                 |
| Rv0233  | 27 | 8  | 1,586516782 information pathways                    |
| Rv1240  | 27 | 8  | 1,586516782 intermediary metabolism and respiration |
| Rv3494c | 5  | 4  | 1,591180886 virulence, detoxification, adaptation   |
| Rv1662  | 5  | 4  | 1,591180886 lipid metabolism                        |
| Rv1458c | 5  | 4  | 1,591180886 cell wall and cell processes            |

|         |     |     |                                                     |
|---------|-----|-----|-----------------------------------------------------|
| Rv1619  | 5   | 4   | 1,591180886 cell wall and cell processes            |
| Rv2685  | 5   | 4   | 1,591180886 cell wall and cell processes            |
| Rv3331  | 5   | 4   | 1,591180886 cell wall and cell processes            |
| Rv1763  | 5   | 4   | 1,591180886 insertion seqs and phages               |
| Rv0255c | 5   | 4   | 1,591180886 intermediary metabolism and respiration |
| Rv0389  | 5   | 4   | 1,591180886 intermediary metabolism and respiration |
| Rv0542c | 5   | 4   | 1,591180886 intermediary metabolism and respiration |
| Rv0812  | 5   | 4   | 1,591180886 intermediary metabolism and respiration |
| Rv0819  | 5   | 4   | 1,591180886 intermediary metabolism and respiration |
| Rv1163  | 5   | 4   | 1,591180886 intermediary metabolism and respiration |
| Rv1377c | 5   | 4   | 1,591180886 intermediary metabolism and respiration |
| Rv2918c | 5   | 4   | 1,591180886 intermediary metabolism and respiration |
| Rv3485c | 5   | 4   | 1,591180886 intermediary metabolism and respiration |
| Rv3685c | 5   | 4   | 1,591180886 intermediary metabolism and respiration |
| Rv1534  | 5   | 4   | 1,591180886 regulatory proteins                     |
| Rv2640c | 5   | 4   | 1,591180886 regulatory proteins                     |
| Rv0471c | 5   | 4   | 1,591180886 conserved hypotheticals                 |
| Rv1525  | 5   | 4   | 1,591180886 conserved hypotheticals                 |
| Rv2143  | 5   | 4   | 1,591180886 conserved hypotheticals                 |
| Rv3312c | 5   | 4   | 1,591180886 conserved hypotheticals                 |
| Rv3365c | 5   | 4   | 1,591180886 conserved hypotheticals                 |
| Rv3603c | 5   | 4   | 1,591180886 conserved hypotheticals                 |
| Rv3822  | 5   | 4   | 1,591180886 conserved hypotheticals                 |
| Rv3808c | 28  | 8   | 1,564722585 cell wall and cell processes            |
| Rv3877  | 28  | 8   | 1,564722585 cell wall and cell processes            |
| Rv1265  | 28  | 8   | 1,564722585 conserved hypotheticals                 |
| Rv1113  | 16  | 4   | 1,565571623 virulence, detoxification, adaptation   |
| Rv2935  | 16  | 4   | 1,565571623 lipid metabolism                        |
| Rv0518  | 16  | 4   | 1,565571623 cell wall and cell processes            |
| Rv1698  | 16  | 4   | 1,565571623 cell wall and cell processes            |
| Rv2022c | 16  | 4   | 1,565571623 conserved hypotheticals                 |
| Rv2255c | 16  | 4   | 1,565571623 conserved hypotheticals                 |
| Rv0984  | 98  | 47  | 1,560225287 intermediary metabolism and respiration |
| Rv1298  | 278 | 106 | 1,559840541 information pathways                    |

|         |    |    |                                                     |
|---------|----|----|-----------------------------------------------------|
| Rv2925c | 82 | 29 | 1,565142876 information pathways                    |
| Rv3803c | 44 | 14 | 1,575117949 lipid metabolism                        |
| Rv2948c | 24 | 13 | 1,576060148 lipid metabolism                        |
| Rv3633  | 24 | 13 | 1,576060148 conserved hypotheticals                 |
| Rv1617  | 13 | 8  | 1,574938316 intermediary metabolism and respiration |
| Rv3441c | 13 | 8  | 1,574938316 intermediary metabolism and respiration |
| Rv1836c | 13 | 8  | 1,574938316 conserved hypotheticals                 |
| Rv0637  | 29 | 9  | 1,606720699 intermediary metabolism and respiration |
| Rv2368c | 29 | 9  | 1,606720699 intermediary metabolism and respiration |
| Rv0909  | 29 | 9  | 1,606720699 conserved hypotheticals                 |
| Rv2127  | 30 | 9  | 1,604484641 cell wall and cell processes            |
| Rv3217c | 45 | 15 | 1,604484641 cell wall and cell processes            |
| Rv3709c | 30 | 9  | 1,604484641 intermediary metabolism and respiration |
| Rv0715  | 46 | 15 | 1,601594378 information pathways                    |
| Rv0003  | 14 | 8  | 1,612783813 information pathways                    |
| Rv0677c | 14 | 8  | 1,612783813 cell wall and cell processes            |
| Rv2290  | 14 | 8  | 1,612783813 cell wall and cell processes            |
| Rv3828c | 14 | 8  | 1,612783813 insertion seqs and phages               |
| Rv1599  | 14 | 8  | 1,612783813 intermediary metabolism and respiration |
| Rv3601c | 14 | 8  | 1,612783813 intermediary metabolism and respiration |
| Rv1117  | 14 | 8  | 1,612783813 conserved hypotheticals                 |
| Rv2675c | 14 | 8  | 1,612783813 conserved hypotheticals                 |
| Rv0174  | 66 | 23 | 1,607165935 virulence, detoxification, adaptation   |
| Rv0437c | 6  | 4  | 1,626848803 lipid metabolism                        |
| Rv2482c | 6  | 4  | 1,626848803 lipid metabolism                        |
| Rv2502c | 6  | 4  | 1,626848803 lipid metabolism                        |
| Rv0191  | 6  | 4  | 1,626848803 cell wall and cell processes            |
| Rv0403c | 6  | 4  | 1,626848803 cell wall and cell processes            |
| Rv0531  | 6  | 4  | 1,626848803 cell wall and cell processes            |
| Rv1018c | 6  | 4  | 1,626848803 cell wall and cell processes            |
| Rv2155c | 6  | 4  | 1,626848803 cell wall and cell processes            |
| Rv2174  | 6  | 4  | 1,626848803 cell wall and cell processes            |
| Rv2333c | 6  | 4  | 1,626848803 cell wall and cell processes            |
| Rv0869c | 6  | 4  | 1,626848803 intermediary metabolism and respiration |

|         |     |    |                                                     |
|---------|-----|----|-----------------------------------------------------|
| Rv2065  | 6   | 4  | 1,626848803 intermediary metabolism and respiration |
| Rv2447c | 6   | 4  | 1,626848803 intermediary metabolism and respiration |
| Rv3247c | 6   | 4  | 1,626848803 intermediary metabolism and respiration |
| Rv3255c | 6   | 4  | 1,626848803 intermediary metabolism and respiration |
| Rv3305c | 6   | 4  | 1,626848803 intermediary metabolism and respiration |
| Rv3525c | 6   | 4  | 1,626848803 intermediary metabolism and respiration |
| Rv3461c | 121 | 44 | 1,609642867 information pathways                    |
| Rv2842c | 49  | 16 | 1,614769645 conserved hypotheticals                 |
| Rv0461  | 18  | 5  | 1,624443598 cell wall and cell processes            |
| Rv0934  | 18  | 5  | 1,624443598 cell wall and cell processes            |
| Rv1690  | 18  | 5  | 1,624443598 cell wall and cell processes            |
| Rv0811c | 18  | 5  | 1,624443598 conserved hypotheticals                 |
| Rv3846  | 19  | 5  | 1,628299018 virulence, detoxification, adaptation   |
| Rv1521  | 19  | 5  | 1,628299018 lipid metabolism                        |
| Rv3852  | 19  | 5  | 1,628299018 information pathways                    |
| Rv3265c | 19  | 5  | 1,628299018 cell wall and cell processes            |
| Rv0665  | 1   | 1  | 1,625662704 virulence, detoxification, adaptation   |
| Rv1938  | 1   | 1  | 1,625662704 virulence, detoxification, adaptation   |
| Rv1953  | 1   | 1  | 1,625662704 virulence, detoxification, adaptation   |
| Rv1965  | 1   | 1  | 1,625662704 virulence, detoxification, adaptation   |
| Rv2303c | 1   | 1  | 1,625662704 virulence, detoxification, adaptation   |
| Rv2546  | 1   | 1  | 1,625662704 virulence, detoxification, adaptation   |
| Rv2757c | 1   | 1  | 1,625662704 virulence, detoxification, adaptation   |
| Rv0035  | 1   | 1  | 1,625662704 lipid metabolism                        |
| Rv2188c | 1   | 1  | 1,625662704 lipid metabolism                        |
| Rv2261c | 1   | 1  | 1,625662704 lipid metabolism                        |
| Rv2381c | 1   | 1  | 1,625662704 lipid metabolism                        |
| Rv2383c | 1   | 1  | 1,625662704 lipid metabolism                        |
| Rv3107c | 1   | 1  | 1,625662704 lipid metabolism                        |
| Rv3561  | 1   | 1  | 1,625662704 lipid metabolism                        |
| Rv0631c | 1   | 1  | 1,625662704 information pathways                    |
| Rv1160  | 1   | 1  | 1,625662704 information pathways                    |
| Rv1189  | 1   | 1  | 1,625662704 information pathways                    |
| Rv1537  | 1   | 1  | 1,625662704 information pathways                    |

|         |   |   |                                          |
|---------|---|---|------------------------------------------|
| Rv3297  | 1 | 1 | 1,625662704 information pathways         |
| Rv0218  | 1 | 1 | 1,625662704 cell wall and cell processes |
| Rv0219  | 1 | 1 | 1,625662704 cell wall and cell processes |
| Rv0318c | 1 | 1 | 1,625662704 cell wall and cell processes |
| Rv0604  | 1 | 1 | 1,625662704 cell wall and cell processes |
| Rv0806c | 1 | 1 | 1,625662704 cell wall and cell processes |
| Rv0879c | 1 | 1 | 1,625662704 cell wall and cell processes |
| Rv1008  | 1 | 1 | 1,625662704 cell wall and cell processes |
| Rv1030  | 1 | 1 | 1,625662704 cell wall and cell processes |
| Rv1031  | 1 | 1 | 1,625662704 cell wall and cell processes |
| Rv1183  | 1 | 1 | 1,625662704 cell wall and cell processes |
| Rv1258c | 1 | 1 | 1,625662704 cell wall and cell processes |
| Rv1269c | 1 | 1 | 1,625662704 cell wall and cell processes |
| Rv1273c | 1 | 1 | 1,625662704 cell wall and cell processes |
| Rv1348  | 1 | 1 | 1,625662704 cell wall and cell processes |
| Rv1349  | 1 | 1 | 1,625662704 cell wall and cell processes |
| Rv1567c | 1 | 1 | 1,625662704 cell wall and cell processes |
| Rv1739c | 1 | 1 | 1,625662704 cell wall and cell processes |
| Rv1972  | 1 | 1 | 1,625662704 cell wall and cell processes |
| Rv2039c | 1 | 1 | 1,625662704 cell wall and cell processes |
| Rv2317  | 1 | 1 | 1,625662704 cell wall and cell processes |
| Rv2318  | 1 | 1 | 1,625662704 cell wall and cell processes |
| Rv2341  | 1 | 1 | 1,625662704 cell wall and cell processes |
| Rv2401A | 1 | 1 | 1,625662704 cell wall and cell processes |
| Rv2834c | 1 | 1 | 1,625662704 cell wall and cell processes |
| Rv3163c | 1 | 1 | 1,625662704 cell wall and cell processes |
| Rv3578  | 1 | 1 | 1,625662704 cell wall and cell processes |
| Rv3641c | 1 | 1 | 1,625662704 cell wall and cell processes |
| Rv3657c | 1 | 1 | 1,625662704 cell wall and cell processes |
| Rv3743c | 1 | 1 | 1,625662704 cell wall and cell processes |
| Rv3901c | 1 | 1 | 1,625662704 cell wall and cell processes |
| Rv2177c | 1 | 1 | 1,625662704 insertion seqs and phages    |
| Rv2424c | 1 | 1 | 1,625662704 insertion seqs and phages    |
| Rv2943A | 1 | 1 | 1,625662704 insertion seqs and phages    |

|         |   |   |                                                     |
|---------|---|---|-----------------------------------------------------|
| Rv2944  | 1 | 1 | 1,625662704 insertion seqs and phages               |
| Rv3770A | 1 | 1 | 1,625662704 insertion seqs and phages               |
| Rv3844  | 1 | 1 | 1,625662704 insertion seqs and phages               |
| Rv0442c | 1 | 1 | 1,625662704 PE/PPE                                  |
| Rv0742  | 1 | 1 | 1,625662704 PE/PPE                                  |
| Rv0754  | 1 | 1 | 1,625662704 PE/PPE                                  |
| Rv1441c | 1 | 1 | 1,625662704 PE/PPE                                  |
| Rv1840c | 1 | 1 | 1,625662704 PE/PPE                                  |
| Rv2769c | 1 | 1 | 1,625662704 PE/PPE                                  |
| Rv3539  | 1 | 1 | 1,625662704 PE/PPE                                  |
| Rv3892c | 1 | 1 | 1,625662704 PE/PPE                                  |
| Rv0070c | 1 | 1 | 1,625662704 intermediary metabolism and respiration |
| Rv0216  | 1 | 1 | 1,625662704 intermediary metabolism and respiration |
| Rv0385  | 1 | 1 | 1,625662704 intermediary metabolism and respiration |
| Rv0480c | 1 | 1 | 1,625662704 intermediary metabolism and respiration |
| Rv0492c | 1 | 1 | 1,625662704 intermediary metabolism and respiration |
| Rv0535  | 1 | 1 | 1,625662704 intermediary metabolism and respiration |
| Rv0765c | 1 | 1 | 1,625662704 intermediary metabolism and respiration |
| Rv0782  | 1 | 1 | 1,625662704 intermediary metabolism and respiration |
| Rv0843  | 1 | 1 | 1,625662704 intermediary metabolism and respiration |
| Rv1170  | 1 | 1 | 1,625662704 intermediary metabolism and respiration |
| Rv1432  | 1 | 1 | 1,625662704 intermediary metabolism and respiration |
| Rv1552  | 1 | 1 | 1,625662704 intermediary metabolism and respiration |
| Rv1555  | 1 | 1 | 1,625662704 intermediary metabolism and respiration |
| Rv1666c | 1 | 1 | 1,625662704 intermediary metabolism and respiration |
| Rv1723  | 1 | 1 | 1,625662704 intermediary metabolism and respiration |
| Rv1834  | 1 | 1 | 1,625662704 intermediary metabolism and respiration |
| Rv1937  | 1 | 1 | 1,625662704 intermediary metabolism and respiration |
| Rv1939  | 1 | 1 | 1,625662704 intermediary metabolism and respiration |
| Rv2071c | 1 | 1 | 1,625662704 intermediary metabolism and respiration |
| Rv2089c | 1 | 1 | 1,625662704 intermediary metabolism and respiration |
| Rv2170  | 1 | 1 | 1,625662704 intermediary metabolism and respiration |
| Rv2321c | 1 | 1 | 1,625662704 intermediary metabolism and respiration |
| Rv2957  | 1 | 1 | 1,625662704 intermediary metabolism and respiration |



|         |   |   |                                                     |
|---------|---|---|-----------------------------------------------------|
| Rv3359  | 1 | 1 | 1,625662704 intermediary metabolism and respiration |
| Rv3375  | 1 | 1 | 1,625662704 intermediary metabolism and respiration |
| Rv3469c | 1 | 1 | 1,625662704 intermediary metabolism and respiration |
| Rv3591c | 1 | 1 | 1,625662704 intermediary metabolism and respiration |
| Rv3742c | 1 | 1 | 1,625662704 intermediary metabolism and respiration |
| Rv2645  | 1 | 1 | 1,625662704 unknown                                 |
| Rv0260c | 1 | 1 | 1,625662704 regulatory proteins                     |
| Rv0891c | 1 | 1 | 1,625662704 regulatory proteins                     |
| Rv1255c | 1 | 1 | 1,625662704 regulatory proteins                     |
| Rv1556  | 1 | 1 | 1,625662704 regulatory proteins                     |
| Rv2914c | 1 | 1 | 1,625662704 regulatory proteins                     |
| Rv0106  | 1 | 1 | 1,625662704 conserved hypotheticals                 |
| Rv0739  | 1 | 1 | 1,625662704 conserved hypotheticals                 |
| Rv0749A | 1 | 1 | 1,625662704 conserved hypotheticals                 |
| Rv0776c | 1 | 1 | 1,625662704 conserved hypotheticals                 |
| Rv0826  | 1 | 1 | 1,625662704 conserved hypotheticals                 |
| Rv0923c | 1 | 1 | 1,625662704 conserved hypotheticals                 |
| Rv0979c | 1 | 1 | 1,625662704 conserved hypotheticals                 |
| Rv1012  | 1 | 1 | 1,625662704 conserved hypotheticals                 |
| Rv1112  | 1 | 1 | 1,625662704 conserved hypotheticals                 |
| Rv1118c | 1 | 1 | 1,625662704 conserved hypotheticals                 |
| Rv1125  | 1 | 1 | 1,625662704 conserved hypotheticals                 |
| Rv1288  | 1 | 1 | 1,625662704 conserved hypotheticals                 |
| Rv1290A | 1 | 1 | 1,625662704 conserved hypotheticals                 |
| Rv1532c | 1 | 1 | 1,625662704 conserved hypotheticals                 |
| Rv1673c | 1 | 1 | 1,625662704 conserved hypotheticals                 |
| Rv1804c | 1 | 1 | 1,625662704 conserved hypotheticals                 |
| Rv1888A | 1 | 1 | 1,625662704 conserved hypotheticals                 |
| Rv1944c | 1 | 1 | 1,625662704 conserved hypotheticals                 |
| Rv2077A | 1 | 1 | 1,625662704 conserved hypotheticals                 |
| Rv2179c | 1 | 1 | 1,625662704 conserved hypotheticals                 |
| Rv2264c | 1 | 1 | 1,625662704 conserved hypotheticals                 |
| Rv2293c | 1 | 1 | 1,625662704 conserved hypotheticals                 |
| Rv2415c | 1 | 1 | 1,625662704 conserved hypotheticals                 |

|         |    |    |                                                     |
|---------|----|----|-----------------------------------------------------|
| Rv2432c | 1  | 1  | 1,625662704 conserved hypotheticals                 |
| Rv2433c | 1  | 1  | 1,625662704 conserved hypotheticals                 |
| Rv2491  | 1  | 1  | 1,625662704 conserved hypotheticals                 |
| Rv2578c | 1  | 1  | 1,625662704 conserved hypotheticals                 |
| Rv2618  | 1  | 1  | 1,625662704 conserved hypotheticals                 |
| Rv2712c | 1  | 1  | 1,625662704 conserved hypotheticals                 |
| Rv3090  | 1  | 1  | 1,625662704 conserved hypotheticals                 |
| Rv3541c | 1  | 1  | 1,625662704 conserved hypotheticals                 |
| Rv3586  | 1  | 1  | 1,625662704 conserved hypotheticals                 |
| Rv3659c | 1  | 1  | 1,625662704 conserved hypotheticals                 |
| Rv3839  | 1  | 1  | 1,625662704 conserved hypotheticals                 |
| Rv0270  | 28 | 15 | 1,499613357 lipid metabolism                        |
| Rv1484  | 28 | 15 | 1,499613357 lipid metabolism                        |
| Rv1386  | 50 | 17 | 1,50495613 PE/PPE                                   |
| Rv0283  | 29 | 15 | 1,517143904 cell wall and cell processes            |
| Rv2462c | 29 | 15 | 1,517143904 cell wall and cell processes            |
| Rv0905  | 16 | 9  | 1,519781404 lipid metabolism                        |
| Rv2718c | 16 | 9  | 1,519781404 regulatory proteins                     |
| Rv2372c | 16 | 9  | 1,519781404 conserved hypotheticals                 |
| Rv0558  | 34 | 11 | 1,53307018 intermediary metabolism and respiration  |
| Rv2216  | 34 | 11 | 1,53307018 conserved hypotheticals                  |
| Rv2050  | 35 | 11 | 1,534199282 conserved hypotheticals                 |
| Rv0173  | 49 | 24 | 1,546015182 cell wall and cell processes            |
| Rv1543  | 9  | 2  | 1,554561649 lipid metabolism                        |
| Rv1683  | 9  | 2  | 1,554561649 lipid metabolism                        |
| Rv1997  | 9  | 2  | 1,554561649 cell wall and cell processes            |
| Rv2878c | 9  | 2  | 1,554561649 cell wall and cell processes            |
| Rv2105  | 9  | 2  | 1,554561649 insertion seqs and phages               |
| Rv0137c | 9  | 2  | 1,554561649 intermediary metabolism and respiration |
| Rv1855c | 9  | 2  | 1,554561649 intermediary metabolism and respiration |
| Rv2263  | 9  | 2  | 1,554561649 intermediary metabolism and respiration |
| Rv3303c | 9  | 2  | 1,554561649 intermediary metabolism and respiration |
| Rv1743  | 9  | 2  | 1,554561649 regulatory proteins                     |
| Rv3334  | 9  | 2  | 1,554561649 regulatory proteins                     |

|         |     |    |                                                     |
|---------|-----|----|-----------------------------------------------------|
| Rv1025  | 9   | 2  | 1,554561649 conserved hypotheticals                 |
| Rv1513  | 9   | 2  | 1,554561649 conserved hypotheticals                 |
| Rv2226  | 9   | 2  | 1,554561649 conserved hypotheticals                 |
| Rv2777c | 9   | 2  | 1,554561649 conserved hypotheticals                 |
| Rv3205c | 56  | 19 | 1,543982001 conserved hypotheticals                 |
| Rv3002c | 17  | 9  | 1,544827219 intermediary metabolism and respiration |
| Rv0798c | 10  | 2  | 1,547429213 virulence, detoxification, adaptation   |
| Rv0009  | 21  | 6  | 1,547429213 information pathways                    |
| Rv0394c | 10  | 2  | 1,547429213 cell wall and cell processes            |
| Rv0876c | 21  | 6  | 1,547429213 cell wall and cell processes            |
| Rv0929  | 10  | 2  | 1,547429213 cell wall and cell processes            |
| Rv1132  | 10  | 2  | 1,547429213 cell wall and cell processes            |
| Rv2719c | 10  | 2  | 1,547429213 cell wall and cell processes            |
| Rv3464  | 10  | 2  | 1,547429213 intermediary metabolism and respiration |
| Rv0014c | 10  | 2  | 1,547429213 regulatory proteins                     |
| Rv0275c | 10  | 2  | 1,547429213 regulatory proteins                     |
| Rv0410c | 10  | 2  | 1,547429213 regulatory proteins                     |
| Rv1719  | 10  | 2  | 1,547429213 regulatory proteins                     |
| Rv2234  | 10  | 2  | 1,547429213 regulatory proteins                     |
| Rv2275  | 10  | 2  | 1,547429213 conserved hypotheticals                 |
| Rv2561  | 10  | 2  | 1,547429213 conserved hypotheticals                 |
| Rv3856c | 10  | 2  | 1,547429213 conserved hypotheticals                 |
| Rv2190c | 37  | 12 | 1,543372701 virulence, detoxification, adaptation   |
| Rv3610c | 37  | 12 | 1,543372701 cell wall and cell processes            |
| Rv2280  | 37  | 12 | 1,543372701 intermediary metabolism and respiration |
| Rv1794  | 18  | 10 | 1,546748889 conserved hypotheticals                 |
| Rv3221c | 114 | 42 | 1,559742724 lipid metabolism                        |
| Rv0960  | 8   | 5  | 1,574168224 virulence, detoxification, adaptation   |
| Rv1478  | 8   | 5  | 1,574168224 virulence, detoxification, adaptation   |
| Rv3496c | 8   | 5  | 1,574168224 virulence, detoxification, adaptation   |
| Rv0503c | 8   | 5  | 1,574168224 lipid metabolism                        |
| Rv3556c | 8   | 5  | 1,574168224 lipid metabolism                        |
| Rv1633  | 8   | 5  | 1,574168224 information pathways                    |
| Rv1689  | 8   | 5  | 1,574168224 information pathways                    |

|         |    |    |                                                     |
|---------|----|----|-----------------------------------------------------|
| Rv2366c | 8  | 5  | 1,574168224 cell wall and cell processes            |
| Rv1041c | 8  | 5  | 1,574168224 insertion seqs and phages               |
| Rv0189c | 8  | 5  | 1,574168224 intermediary metabolism and respiration |
| Rv0315  | 8  | 5  | 1,574168224 intermediary metabolism and respiration |
| Rv0391  | 8  | 5  | 1,574168224 intermediary metabolism and respiration |
| Rv1099c | 8  | 5  | 1,574168224 intermediary metabolism and respiration |
| Rv2509  | 8  | 5  | 1,574168224 intermediary metabolism and respiration |
| Rv2967c | 8  | 5  | 1,574168224 intermediary metabolism and respiration |
| Rv3198A | 8  | 5  | 1,574168224 intermediary metabolism and respiration |
| Rv1694  | 19 | 10 | 1,56303287 virulence, detoxification, adaptation    |
| Rv3420c | 19 | 10 | 1,56303287 information pathways                     |
| Rv2224c | 19 | 10 | 1,56303287 cell wall and cell processes             |
| Rv2868c | 89 | 32 | 1,572344079 conserved hypotheticals                 |
| Rv3133c | 36 | 18 | 1,576584758 regulatory proteins                     |
| Rv0655  | 85 | 40 | 1,589396422 cell wall and cell processes            |
| Rv2169c | 42 | 14 | 1,594479469 cell wall and cell processes            |
| Rv0594  | 3  | 0  | 1,599556657 virulence, detoxification, adaptation   |
| Rv0596c | 3  | 0  | 1,599556657 virulence, detoxification, adaptation   |
| Rv0749  | 3  | 0  | 1,599556657 virulence, detoxification, adaptation   |
| Rv1991c | 3  | 0  | 1,599556657 virulence, detoxification, adaptation   |
| Rv2801c | 3  | 0  | 1,599556657 virulence, detoxification, adaptation   |
| Rv0564c | 3  | 0  | 1,599556657 lipid metabolism                        |
| Rv1350  | 3  | 0  | 1,599556657 lipid metabolism                        |
| Rv1665  | 3  | 0  | 1,599556657 lipid metabolism                        |
| Rv3399  | 3  | 0  | 1,599556657 lipid metabolism                        |
| Rv2906c | 3  | 0  | 1,599556657 information pathways                    |
| Rv3834c | 3  | 0  | 1,599556657 information pathways                    |
| Rv1029  | 3  | 0  | 1,599556657 cell wall and cell processes            |
| Rv1218c | 3  | 0  | 1,599556657 cell wall and cell processes            |
| Rv2999  | 3  | 0  | 1,599556657 cell wall and cell processes            |
| Rv3020c | 3  | 0  | 1,599556657 cell wall and cell processes            |
| Rv2659c | 3  | 0  | 1,599556657 insertion seqs and phages               |
| Rv0878c | 3  | 0  | 1,599556657 PE/PPE                                  |
| Rv2107  | 3  | 0  | 1,599556657 PE/PPE                                  |

|         |     |    |                                                     |
|---------|-----|----|-----------------------------------------------------|
| Rv3135  | 3   | 0  | 1,599556657 PE/PPE                                  |
| Rv3425  | 3   | 0  | 1,599556657 PE/PPE                                  |
| Rv3507  | 3   | 0  | 1,599556657 PE/PPE                                  |
| Rv3650  | 3   | 0  | 1,599556657 PE/PPE                                  |
| Rv0197  | 3   | 0  | 1,599556657 intermediary metabolism and respiration |
| Rv1523  | 3   | 0  | 1,599556657 intermediary metabolism and respiration |
| Rv1594  | 119 | 55 | 1,599556657 intermediary metabolism and respiration |
| Rv1817  | 3   | 0  | 1,599556657 intermediary metabolism and respiration |
| Rv2073c | 3   | 0  | 1,599556657 intermediary metabolism and respiration |
| Rv2435c | 3   | 0  | 1,599556657 intermediary metabolism and respiration |
| Rv2607  | 3   | 0  | 1,599556657 intermediary metabolism and respiration |
| Rv3537  | 3   | 0  | 1,599556657 intermediary metabolism and respiration |
| Rv3727  | 3   | 0  | 1,599556657 intermediary metabolism and respiration |
| Rv2088  | 3   | 0  | 1,599556657 regulatory proteins                     |
| Rv2250c | 3   | 0  | 1,599556657 regulatory proteins                     |
| Rv0376c | 3   | 0  | 1,599556657 conserved hypotheticals                 |
| Rv0767c | 3   | 0  | 1,599556657 conserved hypotheticals                 |
| Rv0976c | 3   | 0  | 1,599556657 conserved hypotheticals                 |
| Rv1186c | 3   | 0  | 1,599556657 conserved hypotheticals                 |
| Rv1290c | 3   | 0  | 1,599556657 conserved hypotheticals                 |
| Rv1413  | 3   | 0  | 1,599556657 conserved hypotheticals                 |
| Rv1682  | 3   | 0  | 1,599556657 conserved hypotheticals                 |
| Rv1897c | 3   | 0  | 1,599556657 conserved hypotheticals                 |
| Rv2020c | 3   | 0  | 1,599556657 conserved hypotheticals                 |
| Rv2036  | 3   | 0  | 1,599556657 conserved hypotheticals                 |
| Rv2662  | 3   | 0  | 1,599556657 conserved hypotheticals                 |
| Rv2663  | 3   | 0  | 1,599556657 conserved hypotheticals                 |
| Rv2695  | 3   | 0  | 1,599556657 conserved hypotheticals                 |
| Rv2730  | 3   | 0  | 1,599556657 conserved hypotheticals                 |
| Rv3180c | 3   | 0  | 1,599556657 conserved hypotheticals                 |
| Rv3531c | 3   | 0  | 1,599556657 conserved hypotheticals                 |
| Rv3654c | 3   | 0  | 1,599556657 conserved hypotheticals                 |
| Rv3819  | 3   | 0  | 1,599556657 conserved hypotheticals                 |
| Rv2219  | 38  | 19 | 1,556654423 cell wall and cell processes            |

|         |    |    |                                                     |
|---------|----|----|-----------------------------------------------------|
| Rv2150c | 39 | 19 | 1,571585115 cell wall and cell processes            |
| Rv0127  | 9  | 5  | 1,578464094 virulence, detoxification, adaptation   |
| Rv0221  | 9  | 5  | 1,578464094 lipid metabolism                        |
| Rv0914c | 9  | 5  | 1,578464094 lipid metabolism                        |
| Rv0010c | 9  | 5  | 1,578464094 cell wall and cell processes            |
| Rv0933  | 9  | 5  | 1,578464094 cell wall and cell processes            |
| Rv2081c | 9  | 5  | 1,578464094 cell wall and cell processes            |
| Rv0555  | 9  | 5  | 1,578464094 intermediary metabolism and respiration |
| Rv0865  | 9  | 5  | 1,578464094 intermediary metabolism and respiration |
| Rv2221c | 9  | 5  | 1,578464094 intermediary metabolism and respiration |
| Rv3299c | 9  | 5  | 1,578464094 intermediary metabolism and respiration |
| Rv2298  | 9  | 5  | 1,578464094 conserved hypotheticals                 |
| Rv0473  | 12 | 3  | 1,584784325 cell wall and cell processes            |
| Rv1565c | 12 | 3  | 1,584784325 cell wall and cell processes            |
| Rv1888c | 12 | 3  | 1,584784325 cell wall and cell processes            |
| Rv2693c | 12 | 3  | 1,584784325 cell wall and cell processes            |
| Rv3194c | 12 | 3  | 1,584784325 cell wall and cell processes            |
| Rv2519  | 12 | 3  | 1,584784325 PE/PPE                                  |
| Rv2764c | 12 | 3  | 1,584784325 intermediary metabolism and respiration |
| Rv3816c | 12 | 3  | 1,584784325 intermediary metabolism and respiration |
| Rv1059  | 12 | 3  | 1,584784325 conserved hypotheticals                 |
| Rv1390  | 23 | 12 | 1,584567588 information pathways                    |
| Rv1379  | 47 | 16 | 1,589716418 regulatory proteins                     |
| Rv0617  | 10 | 6  | 1,596501768 virulence, detoxification, adaptation   |
| Rv2389c | 10 | 6  | 1,596501768 cell wall and cell processes            |
| Rv0578c | 10 | 6  | 1,596501768 PE/PPE                                  |
| Rv0317c | 10 | 6  | 1,596501768 intermediary metabolism and respiration |
| Rv1098c | 10 | 6  | 1,596501768 intermediary metabolism and respiration |
| Rv1207  | 10 | 6  | 1,596501768 intermediary metabolism and respiration |
| Rv3436c | 10 | 6  | 1,596501768 intermediary metabolism and respiration |
| Rv1046c | 10 | 6  | 1,596501768 unknown                                 |
| Rv2795c | 10 | 6  | 1,596501768 conserved hypotheticals                 |
| Rv3272  | 10 | 6  | 1,596501768 conserved hypotheticals                 |
| Rv1562c | 2  | 2  | 1,596167912 virulence, detoxification, adaptation   |

|         |   |   |                                                     |
|---------|---|---|-----------------------------------------------------|
| Rv1838c | 2 | 2 | 1,596167912 virulence, detoxification, adaptation   |
| Rv1943c | 2 | 2 | 1,596167912 virulence, detoxification, adaptation   |
| Rv0119  | 2 | 2 | 1,596167912 lipid metabolism                        |
| Rv0447c | 2 | 2 | 1,596167912 lipid metabolism                        |
| Rv1182  | 2 | 2 | 1,596167912 lipid metabolism                        |
| Rv1329c | 2 | 2 | 1,596167912 information pathways                    |
| Rv1402  | 2 | 2 | 1,596167912 information pathways                    |
| Rv0924c | 2 | 2 | 1,596167912 cell wall and cell processes            |
| Rv1024  | 2 | 2 | 1,596167912 cell wall and cell processes            |
| Rv2046  | 2 | 2 | 1,596167912 cell wall and cell processes            |
| Rv2832c | 2 | 2 | 1,596167912 cell wall and cell processes            |
| Rv2920c | 2 | 2 | 1,596167912 cell wall and cell processes            |
| Rv3069  | 2 | 2 | 1,596167912 cell wall and cell processes            |
| Rv3664c | 2 | 2 | 1,596167912 cell wall and cell processes            |
| Rv3690  | 2 | 2 | 1,596167912 cell wall and cell processes            |
| Rv0305c | 2 | 2 | 1,596167912 PE/PPE                                  |
| Rv0044c | 2 | 2 | 1,596167912 intermediary metabolism and respiration |
| Rv0253  | 2 | 2 | 1,596167912 intermediary metabolism and respiration |
| Rv0768  | 2 | 2 | 1,596167912 intermediary metabolism and respiration |
| Rv0769  | 2 | 2 | 1,596167912 intermediary metabolism and respiration |
| Rv0868c | 2 | 2 | 1,596167912 intermediary metabolism and respiration |
| Rv0956  | 2 | 2 | 1,596167912 intermediary metabolism and respiration |
| Rv1524  | 2 | 2 | 1,596167912 intermediary metabolism and respiration |
| Rv1852  | 2 | 2 | 1,596167912 intermediary metabolism and respiration |
| Rv3077  | 2 | 2 | 1,596167912 intermediary metabolism and respiration |
| Rv3313c | 2 | 2 | 1,596167912 intermediary metabolism and respiration |
| Rv3432c | 2 | 2 | 1,596167912 intermediary metabolism and respiration |
| Rv3817  | 2 | 2 | 1,596167912 intermediary metabolism and respiration |
| Rv3291c | 2 | 2 | 1,596167912 regulatory proteins                     |
| Rv0264c | 2 | 2 | 1,596167912 conserved hypotheticals                 |
| Rv0307c | 2 | 2 | 1,596167912 conserved hypotheticals                 |
| Rv0349  | 2 | 2 | 1,596167912 conserved hypotheticals                 |
| Rv0698  | 2 | 2 | 1,596167912 conserved hypotheticals                 |
| Rv2133c | 2 | 2 | 1,596167912 conserved hypotheticals                 |

|         |     |    |                                                     |
|---------|-----|----|-----------------------------------------------------|
| Rv2375  | 2   | 2  | 1,596167912 conserved hypotheticals                 |
| Rv2705c | 2   | 2  | 1,596167912 conserved hypotheticals                 |
| Rv2802c | 2   | 2  | 1,596167912 conserved hypotheticals                 |
| Rv2820c | 2   | 2  | 1,596167912 conserved hypotheticals                 |
| Rv2821c | 2   | 2  | 1,596167912 conserved hypotheticals                 |
| Rv2823c | 2   | 2  | 1,596167912 conserved hypotheticals                 |
| Rv2824c | 2   | 2  | 1,596167912 conserved hypotheticals                 |
| Rv3033  | 2   | 2  | 1,596167912 conserved hypotheticals                 |
| Rv3172c | 2   | 2  | 1,596167912 conserved hypotheticals                 |
| Rv3231c | 2   | 2  | 1,596167912 conserved hypotheticals                 |
| Rv3394c | 2   | 2  | 1,596167912 conserved hypotheticals                 |
| Rv3438  | 2   | 2  | 1,596167912 conserved hypotheticals                 |
| Rv3542c | 2   | 2  | 1,596167912 conserved hypotheticals                 |
| Rv3705A | 2   | 2  | 1,596167912 conserved hypotheticals                 |
| Rv3882c | 28  | 9  | 1,564923274 cell wall and cell processes            |
| Rv2798c | 28  | 9  | 1,564923274 conserved hypotheticals                 |
| Rv0859  | 25  | 13 | 1,5711938 lipid metabolism                          |
| Rv1304  | 46  | 22 | 1,577499679 intermediary metabolism and respiration |
| Rv3757c | 11  | 6  | 1,585914789 virulence, detoxification, adaptation   |
| Rv0222  | 11  | 6  | 1,585914789 lipid metabolism                        |
| Rv0436c | 11  | 6  | 1,585914789 lipid metabolism                        |
| Rv1589  | 11  | 6  | 1,585914789 intermediary metabolism and respiration |
| Rv2850c | 11  | 6  | 1,585914789 intermediary metabolism and respiration |
| Rv3319  | 11  | 6  | 1,585914789 intermediary metabolism and respiration |
| Rv0201c | 11  | 6  | 1,585914789 conserved hypotheticals                 |
| Rv2417c | 11  | 6  | 1,585914789 conserved hypotheticals                 |
| Rv1435c | 26  | 13 | 1,580486656 cell wall and cell processes            |
| Rv2197c | 26  | 13 | 1,580486656 cell wall and cell processes            |
| Rv0243  | 75  | 35 | 1,581701965 lipid metabolism                        |
| Rv3678c | 110 | 50 | 1,5874362 conserved hypotheticals                   |
| Rv3206c | 30  | 10 | 1,593427162 intermediary metabolism and respiration |
| Rv3842c | 30  | 10 | 1,593427162 intermediary metabolism and respiration |
| Rv0440  | 31  | 10 | 1,594888712 virulence, detoxification, adaptation   |
| Rv1303  | 50  | 24 | 1,600603814 cell wall and cell processes            |



|         |    |    |                                                     |
|---------|----|----|-----------------------------------------------------|
| Rv1952  | 14 | 4  | 1,605526098 virulence, detoxification, adaptation   |
| Rv0244c | 14 | 4  | 1,605526098 lipid metabolism                        |
| Rv0405  | 14 | 4  | 1,605526098 lipid metabolism                        |
| Rv1905c | 14 | 4  | 1,605526098 intermediary metabolism and respiration |
| Rv2210c | 14 | 4  | 1,605526098 intermediary metabolism and respiration |
| Rv2849c | 28 | 14 | 1,605526098 intermediary metabolism and respiration |
| Rv2987c | 14 | 4  | 1,605526098 intermediary metabolism and respiration |
| Rv0982  | 28 | 14 | 1,605526098 regulatory proteins                     |
| Rv0181c | 14 | 4  | 1,605526098 conserved hypotheticals                 |
| Rv3818  | 14 | 4  | 1,605526098 conserved hypotheticals                 |
| Rv0400c | 15 | 4  | 1,604897736 lipid metabolism                        |
| Rv0445c | 15 | 4  | 1,604897736 information pathways                    |
| Rv0479c | 15 | 4  | 1,604897736 cell wall and cell processes            |
| Rv2575  | 15 | 4  | 1,604897736 cell wall and cell processes            |
| Rv1076  | 15 | 4  | 1,604897736 intermediary metabolism and respiration |
| Rv3276c | 15 | 4  | 1,604897736 intermediary metabolism and respiration |
| Rv0530  | 15 | 4  | 1,604897736 conserved hypotheticals                 |
| Rv3472  | 15 | 4  | 1,604897736 conserved hypotheticals                 |
| Rv3051c | 83 | 38 | 1,608816046 information pathways                    |
| Rv2639c | 29 | 14 | 1,61005 cell wall and cell processes                |
| Rv2737c | 33 | 11 | 1,611023153 information pathways                    |
| Rv2128  | 33 | 11 | 1,611023153 cell wall and cell processes            |
| Rv3843c | 33 | 11 | 1,611023153 cell wall and cell processes            |
| Rv3791  | 13 | 7  | 1,620154916 lipid metabolism                        |
| Rv1615  | 13 | 7  | 1,620154916 cell wall and cell processes            |
| Rv2206  | 13 | 7  | 1,620154916 cell wall and cell processes            |
| Rv1602  | 13 | 7  | 1,620154916 intermediary metabolism and respiration |
| Rv1862  | 13 | 7  | 1,620154916 intermediary metabolism and respiration |
| Rv0775  | 13 | 7  | 1,620154916 conserved hypotheticals                 |
| Rv2125  | 13 | 7  | 1,620154916 conserved hypotheticals                 |
| Rv3268  | 13 | 7  | 1,620154916 conserved hypotheticals                 |
| Rv2032  | 31 | 15 | 1,625015208 conserved hypotheticals                 |
| Rv3799c | 56 | 26 | 1,624942946 lipid metabolism                        |
| Rv2949c | 61 | 22 | 1,625128512 intermediary metabolism and respiration |

|         |    |    |                                                     |
|---------|----|----|-----------------------------------------------------|
| Rv0424c | 61 | 22 | 1,625128512 conserved hypotheticals                 |
| Rv1299  | 35 | 12 | 1,630391268 information pathways                    |
| Rv2517c | 35 | 12 | 1,630391268 conserved hypotheticals                 |
| Rv1389  | 36 | 12 | 1,632813707 intermediary metabolism and respiration |
| Rv0678  | 36 | 12 | 1,632813707 conserved hypotheticals                 |
| Rv1765c | 36 | 12 | 1,632813707 conserved hypotheticals                 |
| Rv0627  | 3  | 2  | 1,631558424 virulence, detoxification, adaptation   |
| Rv1026  | 3  | 2  | 1,631558424 virulence, detoxification, adaptation   |
| Rv1561  | 3  | 2  | 1,631558424 virulence, detoxification, adaptation   |
| Rv2026c | 3  | 2  | 1,631558424 virulence, detoxification, adaptation   |
| Rv2494  | 3  | 2  | 1,631558424 virulence, detoxification, adaptation   |
| Rv0033  | 3  | 2  | 1,631558424 lipid metabolism                        |
| Rv1181  | 3  | 2  | 1,631558424 lipid metabolism                        |
| Rv1663  | 3  | 2  | 1,631558424 lipid metabolism                        |
| Rv3039c | 3  | 2  | 1,631558424 lipid metabolism                        |
| Rv1316c | 3  | 2  | 1,631558424 information pathways                    |
| Rv1649  | 3  | 2  | 1,631558424 information pathways                    |
| Rv1981c | 3  | 2  | 1,631558424 information pathways                    |
| Rv0110  | 3  | 2  | 1,631558424 cell wall and cell processes            |
| Rv0482  | 3  | 2  | 1,631558424 cell wall and cell processes            |
| Rv0583c | 3  | 2  | 1,631558424 cell wall and cell processes            |
| Rv0912  | 3  | 2  | 1,631558424 cell wall and cell processes            |
| Rv1668c | 3  | 2  | 1,631558424 cell wall and cell processes            |
| Rv2434c | 3  | 2  | 1,631558424 cell wall and cell processes            |
| Rv2571c | 3  | 2  | 1,631558424 cell wall and cell processes            |
| Rv1370c | 3  | 2  | 1,631558424 insertion seqs and phages               |
| Rv2650c | 3  | 2  | 1,631558424 insertion seqs and phages               |
| Rv3381c | 3  | 2  | 1,631558424 insertion seqs and phages               |
| Rv1214c | 3  | 2  | 1,631558424 PE/PPE                                  |
| Rv3739c | 3  | 2  | 1,631558424 PE/PPE                                  |
| Rv0083  | 3  | 2  | 1,631558424 intermediary metabolism and respiration |
| Rv0183  | 3  | 2  | 1,631558424 intermediary metabolism and respiration |
| Rv0753c | 3  | 2  | 1,631558424 intermediary metabolism and respiration |
| Rv0886  | 3  | 2  | 1,631558424 intermediary metabolism and respiration |

|         |   |   |                                                     |
|---------|---|---|-----------------------------------------------------|
| Rv1096  | 3 | 2 | 1,631558424 intermediary metabolism and respiration |
| Rv1254  | 3 | 2 | 1,631558424 intermediary metabolism and respiration |
| Rv1653  | 3 | 2 | 1,631558424 intermediary metabolism and respiration |
| Rv1785c | 3 | 2 | 1,631558424 intermediary metabolism and respiration |
| Rv1850  | 3 | 2 | 1,631558424 intermediary metabolism and respiration |
| Rv2070c | 3 | 2 | 1,631558424 intermediary metabolism and respiration |
| Rv2139  | 3 | 2 | 1,631558424 intermediary metabolism and respiration |
| Rv2266  | 3 | 2 | 1,631558424 intermediary metabolism and respiration |
| Rv2765  | 3 | 2 | 1,631558424 intermediary metabolism and respiration |
| Rv3068c | 3 | 2 | 1,631558424 intermediary metabolism and respiration |
| Rv3227  | 3 | 2 | 1,631558424 intermediary metabolism and respiration |
| Rv3602c | 3 | 2 | 1,631558424 intermediary metabolism and respiration |
| Rv3696c | 3 | 2 | 1,631558424 intermediary metabolism and respiration |
| Rv0325  | 3 | 2 | 1,631558424 unknown                                 |
| Rv0465c | 3 | 2 | 1,631558424 regulatory proteins                     |
| Rv3164c | 3 | 2 | 1,631558424 regulatory proteins                     |
| Rv3764c | 3 | 2 | 1,631558424 regulatory proteins                     |
| Rv0743c | 3 | 2 | 1,631558424 conserved hypotheticals                 |
| Rv1043c | 3 | 2 | 1,631558424 conserved hypotheticals                 |
| Rv1508A | 3 | 2 | 1,631558424 conserved hypotheticals                 |
| Rv1725c | 3 | 2 | 1,631558424 conserved hypotheticals                 |
| Rv1752  | 3 | 2 | 1,631558424 conserved hypotheticals                 |
| Rv1767  | 3 | 2 | 1,631558424 conserved hypotheticals                 |
| Rv1823  | 3 | 2 | 1,631558424 conserved hypotheticals                 |
| Rv1978  | 3 | 2 | 1,631558424 conserved hypotheticals                 |
| Rv2387  | 3 | 2 | 1,631558424 conserved hypotheticals                 |
| Rv2826c | 3 | 2 | 1,631558424 conserved hypotheticals                 |
| Rv2880c | 3 | 2 | 1,631558424 conserved hypotheticals                 |
| Rv3031  | 3 | 2 | 1,631558424 conserved hypotheticals                 |
| Rv3037c | 3 | 2 | 1,631558424 conserved hypotheticals                 |
| Rv3103c | 3 | 2 | 1,631558424 conserved hypotheticals                 |
| Rv3228  | 3 | 2 | 1,631558424 conserved hypotheticals                 |
| Rv3304  | 3 | 2 | 1,631558424 conserved hypotheticals                 |
| Rv3363c | 3 | 2 | 1,631558424 conserved hypotheticals                 |

|         |     |     |                                                     |
|---------|-----|-----|-----------------------------------------------------|
| Rv3403c | 3   | 2   | 1,631558424 conserved hypotheticals                 |
| Rv3707c | 3   | 2   | 1,631558424 conserved hypotheticals                 |
| Rv3490  | 33  | 16  | 1,588859408 virulence, detoxification, adaptation   |
| Rv1361c | 33  | 16  | 1,588859408 PE/PPE                                  |
| Rv2406c | 33  | 16  | 1,588859408 conserved hypotheticals                 |
| Rv3881c | 60  | 28  | 1,589201503 cell wall and cell processes            |
| Rv0643c | 14  | 7   | 1,59088643 lipid metabolism                         |
| Rv2784c | 14  | 7   | 1,59088643 cell wall and cell processes             |
| Rv0788  | 14  | 7   | 1,59088643 intermediary metabolism and respiration  |
| Rv0613c | 14  | 7   | 1,59088643 conserved hypotheticals                  |
| Rv1914c | 14  | 7   | 1,59088643 conserved hypotheticals                  |
| Rv1959c | 17  | 5   | 1,587902997 virulence, detoxification, adaptation   |
| Rv2553c | 17  | 5   | 1,587902997 cell wall and cell processes            |
| Rv2396  | 17  | 5   | 1,587902997 PE/PPE                                  |
| Rv0333  | 17  | 5   | 1,587902997 conserved hypotheticals                 |
| Rv1531  | 17  | 5   | 1,587902997 conserved hypotheticals                 |
| Rv3224B | 17  | 5   | 1,587902997 conserved hypotheticals                 |
| Rv0134  | 37  | 13  | 1,591299801 virulence, detoxification, adaptation   |
| Rv2732c | 38  | 13  | 1,591247486 cell wall and cell processes            |
| Rv2692  | 15  | 8   | 1,596124577 cell wall and cell processes            |
| Rv3802c | 15  | 8   | 1,596124577 cell wall and cell processes            |
| Rv2186c | 15  | 8   | 1,596124577 conserved hypotheticals                 |
| Rv3519  | 15  | 8   | 1,596124577 conserved hypotheticals                 |
| Rv3053c | 64  | 30  | 1,600825819 information pathways                    |
| Rv0510  | 205 | 91  | 1,61035732 intermediary metabolism and respiration  |
| Rv0049  | 40  | 14  | 1,610541468 conserved hypotheticals                 |
| Rv3887c | 16  | 8   | 1,61784819 cell wall and cell processes             |
| Rv1832  | 16  | 8   | 1,61784819 intermediary metabolism and respiration  |
| Rv2725c | 16  | 8   | 1,61784819 intermediary metabolism and respiration  |
| Rv1072  | 278 | 122 | 1,619369406 cell wall and cell processes            |
| Rv0206c | 38  | 18  | 1,621019396 cell wall and cell processes            |
| Rv2181  | 19  | 6   | 1,627322849 cell wall and cell processes            |
| Rv3157  | 19  | 6   | 1,627322849 intermediary metabolism and respiration |
| Rv3396c | 19  | 6   | 1,627322849 intermediary metabolism and respiration |

|         |     |    |                                                     |
|---------|-----|----|-----------------------------------------------------|
| Rv2809  | 19  | 6  | 1,627322849 conserved hypotheticals                 |
| Rv2496c | 42  | 15 | 1,62606614 intermediary metabolism and respiration  |
| Rv3028c | 42  | 15 | 1,62606614 intermediary metabolism and respiration  |
| Rv2595  | 20  | 6  | 1,629592406 virulence, detoxification, adaptation   |
| Rv0732  | 20  | 6  | 1,629592406 cell wall and cell processes            |
| Rv0818  | 40  | 19 | 1,631891527 regulatory proteins                     |
| Rv2111c | 122 | 47 | 1,643040079 intermediary metabolism and respiration |
| Rv1782  | 41  | 19 | 1,642475295 cell wall and cell processes            |
| Rv0046c | 18  | 9  | 1,644104181 intermediary metabolism and respiration |
| Rv0582  | 5   | 1  | 1,650602655 virulence, detoxification, adaptation   |
| Rv2547  | 5   | 1  | 1,650602655 virulence, detoxification, adaptation   |
| Rv2760c | 5   | 1  | 1,650602655 virulence, detoxification, adaptation   |
| Rv0404  | 5   | 1  | 1,650602655 lipid metabolism                        |
| Rv2939  | 5   | 1  | 1,650602655 lipid metabolism                        |
| Rv3667  | 5   | 1  | 1,650602655 lipid metabolism                        |
| Rv3740c | 5   | 1  | 1,650602655 lipid metabolism                        |
| Rv1364c | 5   | 1  | 1,650602655 information pathways                    |
| Rv3011c | 5   | 1  | 1,650602655 information pathways                    |
| Rv0180c | 5   | 1  | 1,650602655 cell wall and cell processes            |
| Rv0507  | 5   | 1  | 1,650602655 cell wall and cell processes            |
| Rv0987  | 5   | 1  | 1,650602655 cell wall and cell processes            |
| Rv1004c | 5   | 1  | 1,650602655 cell wall and cell processes            |
| Rv1217c | 5   | 1  | 1,650602655 cell wall and cell processes            |
| Rv1235  | 5   | 1  | 1,650602655 cell wall and cell processes            |
| Rv1382  | 5   | 1  | 1,650602655 cell wall and cell processes            |
| Rv1860  | 5   | 1  | 1,650602655 cell wall and cell processes            |
| Rv2180c | 5   | 1  | 1,650602655 cell wall and cell processes            |
| Rv2209  | 5   | 1  | 1,650602655 cell wall and cell processes            |
| Rv2339  | 5   | 1  | 1,650602655 cell wall and cell processes            |
| Rv2400c | 5   | 1  | 1,650602655 cell wall and cell processes            |
| Rv2875  | 5   | 1  | 1,650602655 cell wall and cell processes            |
| Rv3019c | 5   | 1  | 1,650602655 cell wall and cell processes            |
| Rv3452  | 5   | 1  | 1,650602655 cell wall and cell processes            |
| Rv3481c | 5   | 1  | 1,650602655 cell wall and cell processes            |

|         |   |   |                                                     |
|---------|---|---|-----------------------------------------------------|
| Rv3835  | 5 | 1 | 1,650602655 cell wall and cell processes            |
| Rv0095c | 5 | 1 | 1,650602655 insertion seqs and phages               |
| Rv1945  | 5 | 1 | 1,650602655 insertion seqs and phages               |
| Rv3386  | 5 | 1 | 1,650602655 insertion seqs and phages               |
| Rv1807  | 5 | 1 | 1,650602655 PE/PPE                                  |
| Rv3347c | 5 | 1 | 1,650602655 PE/PPE                                  |
| Rv0130  | 5 | 1 | 1,650602655 intermediary metabolism and respiration |
| Rv0334  | 5 | 1 | 1,650602655 intermediary metabolism and respiration |
| Rv0337c | 5 | 1 | 1,650602655 intermediary metabolism and respiration |
| Rv0392c | 5 | 1 | 1,650602655 intermediary metabolism and respiration |
| Rv0575c | 5 | 1 | 1,650602655 intermediary metabolism and respiration |
| Rv0772  | 5 | 1 | 1,650602655 intermediary metabolism and respiration |
| Rv1005c | 5 | 1 | 1,650602655 intermediary metabolism and respiration |
| Rv1014c | 5 | 1 | 1,650602655 intermediary metabolism and respiration |
| Rv1263  | 5 | 1 | 1,650602655 intermediary metabolism and respiration |
| Rv1286  | 5 | 1 | 1,650602655 intermediary metabolism and respiration |
| Rv1381  | 5 | 1 | 1,650602655 intermediary metabolism and respiration |
| Rv1652  | 5 | 1 | 1,650602655 intermediary metabolism and respiration |
| Rv2284  | 5 | 1 | 1,650602655 intermediary metabolism and respiration |
| Rv2800  | 5 | 1 | 1,650602655 intermediary metabolism and respiration |
| Rv3317  | 5 | 1 | 1,650602655 intermediary metabolism and respiration |
| Rv3554  | 5 | 1 | 1,650602655 intermediary metabolism and respiration |
| Rv3754  | 5 | 1 | 1,650602655 intermediary metabolism and respiration |
| Rv2027c | 5 | 1 | 1,650602655 regulatory proteins                     |
| Rv3557c | 5 | 1 | 1,650602655 regulatory proteins                     |
| Rv0332  | 5 | 1 | 1,650602655 conserved hypotheticals                 |
| Rv0786c | 5 | 1 | 1,650602655 conserved hypotheticals                 |
| Rv0874c | 5 | 1 | 1,650602655 conserved hypotheticals                 |
| Rv1748  | 5 | 1 | 1,650602655 conserved hypotheticals                 |
| Rv1977  | 5 | 1 | 1,650602655 conserved hypotheticals                 |
| Rv2132  | 5 | 1 | 1,650602655 conserved hypotheticals                 |
| Rv2532c | 5 | 1 | 1,650602655 conserved hypotheticals                 |
| Rv2683  | 5 | 1 | 1,650602655 conserved hypotheticals                 |
| Rv3189  | 5 | 1 | 1,650602655 conserved hypotheticals                 |

|         |    |    |                                                     |
|---------|----|----|-----------------------------------------------------|
| Rv3656c | 5  | 1  | 1,650602655 conserved hypotheticals                 |
| Rv3718c | 5  | 1  | 1,650602655 conserved hypotheticals                 |
| Rv3732  | 5  | 1  | 1,650602655 conserved hypotheticals                 |
| Rv3903c | 5  | 1  | 1,650602655 conserved hypotheticals                 |
| Rv3156  | 43 | 20 | 1,606211063 intermediary metabolism and respiration |
| Rv1102c | 6  | 1  | 1,609695806 virulence, detoxification, adaptation   |
| Rv1247c | 6  | 1  | 1,609695806 virulence, detoxification, adaptation   |
| Rv2602  | 6  | 1  | 1,609695806 virulence, detoxification, adaptation   |
| Rv3697c | 6  | 1  | 1,609695806 virulence, detoxification, adaptation   |
| Rv1529  | 6  | 1  | 1,609695806 lipid metabolism                        |
| Rv3540c | 6  | 1  | 1,609695806 lipid metabolism                        |
| Rv4000  | 6  | 1  | 1,609695806 information pathways                    |
| Rv1022  | 6  | 1  | 1,609695806 cell wall and cell processes            |
| Rv1252c | 6  | 1  | 1,609695806 cell wall and cell processes            |
| Rv1363c | 6  | 1  | 1,609695806 cell wall and cell processes            |
| Rv1687c | 6  | 1  | 1,609695806 cell wall and cell processes            |
| Rv1709  | 6  | 1  | 1,609695806 cell wall and cell processes            |
| Rv2643  | 6  | 1  | 1,609695806 cell wall and cell processes            |
| Rv1148c | 6  | 1  | 1,609695806 insertion seqs and phages               |
| Rv0892  | 6  | 1  | 1,609695806 intermediary metabolism and respiration |
| Rv1326c | 6  | 1  | 1,609695806 intermediary metabolism and respiration |
| Rv1380  | 6  | 1  | 1,609695806 intermediary metabolism and respiration |
| Rv1500  | 6  | 1  | 1,609695806 intermediary metabolism and respiration |
| Rv2350c | 6  | 1  | 1,609695806 intermediary metabolism and respiration |
| Rv2511  | 6  | 1  | 1,609695806 intermediary metabolism and respiration |
| Rv0212c | 6  | 1  | 1,609695806 regulatory proteins                     |
| Rv0273c | 6  | 1  | 1,609695806 regulatory proteins                     |
| Rv0902c | 6  | 1  | 1,609695806 regulatory proteins                     |
| Rv1266c | 6  | 1  | 1,609695806 regulatory proteins                     |
| Rv0059  | 6  | 1  | 1,609695806 conserved hypotheticals                 |
| Rv0272c | 6  | 1  | 1,609695806 conserved hypotheticals                 |
| Rv0756c | 6  | 1  | 1,609695806 conserved hypotheticals                 |
| Rv0925c | 6  | 1  | 1,609695806 conserved hypotheticals                 |
| Rv1428c | 6  | 1  | 1,609695806 conserved hypotheticals                 |

|         |    |    |                                                     |
|---------|----|----|-----------------------------------------------------|
| Rv1505c | 6  | 1  | 1,609695806 conserved hypotheticals                 |
| Rv1762c | 6  | 1  | 1,609695806 conserved hypotheticals                 |
| Rv1874  | 6  | 1  | 1,609695806 conserved hypotheticals                 |
| Rv2420c | 6  | 1  | 1,609695806 conserved hypotheticals                 |
| Rv2664  | 6  | 1  | 1,609695806 conserved hypotheticals                 |
| Rv3190c | 6  | 1  | 1,609695806 conserved hypotheticals                 |
| Rv3510c | 6  | 1  | 1,609695806 conserved hypotheticals                 |
| Rv3139  | 47 | 17 | 1,58346926 lipid metabolism                         |
| Rv2879c | 47 | 17 | 1,58346926 conserved hypotheticals                  |
| Rv3495c | 21 | 7  | 1,585465543 cell wall and cell processes            |
| Rv3193c | 22 | 7  | 1,586578194 cell wall and cell processes            |
| Rv3694c | 22 | 7  | 1,586578194 cell wall and cell processes            |
| Rv0148  | 22 | 7  | 1,586578194 intermediary metabolism and respiration |
| Rv1678  | 20 | 10 | 1,595465794 cell wall and cell processes            |
| Rv2586c | 20 | 10 | 1,595465794 cell wall and cell processes            |
| Rv0805  | 20 | 10 | 1,595465794 intermediary metabolism and respiration |
| Rv2773c | 20 | 10 | 1,595465794 intermediary metabolism and respiration |
| Rv1178  | 50 | 18 | 1,59456875 intermediary metabolism and respiration  |
| Rv1614  | 52 | 19 | 1,60953035 cell wall and cell processes             |
| Rv2238c | 21 | 10 | 1,610857968 virulence, detoxification, adaptation   |
| Rv0007  | 21 | 10 | 1,610857968 cell wall and cell processes            |
| Rv3146  | 49 | 23 | 1,61005 intermediary metabolism and respiration     |
| Rv3724A | 24 | 8  | 1,61321973 cell wall and cell processes             |
| Rv0921  | 24 | 8  | 1,61321973 insertion seqs and phages                |
| Rv3050c | 24 | 8  | 1,61321973 regulatory proteins                      |
| Rv0301  | 5  | 3  | 1,612812454 virulence, detoxification, adaptation   |
| Rv0598c | 5  | 3  | 1,612812454 virulence, detoxification, adaptation   |
| Rv0623  | 5  | 3  | 1,612812454 virulence, detoxification, adaptation   |
| Rv0231  | 5  | 3  | 1,612812454 lipid metabolism                        |
| Rv1193  | 5  | 3  | 1,612812454 lipid metabolism                        |
| Rv2611c | 5  | 3  | 1,612812454 lipid metabolism                        |
| Rv2613c | 5  | 3  | 1,612812454 lipid metabolism                        |
| Rv1230c | 5  | 3  | 1,612812454 cell wall and cell processes            |
| Rv1231c | 5  | 3  | 1,612812454 cell wall and cell processes            |



|         |    |    |                                                     |
|---------|----|----|-----------------------------------------------------|
| Rv2397c | 5  | 3  | 1,612812454 cell wall and cell processes            |
| Rv2398c | 5  | 3  | 1,612812454 cell wall and cell processes            |
| Rv2459  | 5  | 3  | 1,612812454 cell wall and cell processes            |
| Rv2965c | 5  | 3  | 1,612812454 cell wall and cell processes            |
| Rv3430c | 5  | 3  | 1,612812454 insertion seqs and phages               |
| Rv0794c | 5  | 3  | 1,612812454 intermediary metabolism and respiration |
| Rv1202  | 5  | 3  | 1,612812454 intermediary metabolism and respiration |
| Rv1257c | 5  | 3  | 1,612812454 intermediary metabolism and respiration |
| Rv2118c | 5  | 3  | 1,612812454 intermediary metabolism and respiration |
| Rv3121  | 5  | 3  | 1,612812454 intermediary metabolism and respiration |
| Rv0302  | 5  | 3  | 1,612812454 regulatory proteins                     |
| Rv3060c | 5  | 3  | 1,612812454 regulatory proteins                     |
| Rv0164  | 5  | 3  | 1,612812454 conserved hypotheticals                 |
| Rv1378c | 5  | 3  | 1,612812454 conserved hypotheticals                 |
| Rv1429  | 5  | 3  | 1,612812454 conserved hypotheticals                 |
| Rv2024c | 5  | 3  | 1,612812454 conserved hypotheticals                 |
| Rv2114  | 5  | 3  | 1,612812454 conserved hypotheticals                 |
| Rv2360c | 5  | 3  | 1,612812454 conserved hypotheticals                 |
| Rv2402  | 5  | 3  | 1,612812454 conserved hypotheticals                 |
| Rv2828c | 5  | 3  | 1,612812454 conserved hypotheticals                 |
| Rv3182  | 5  | 3  | 1,612812454 conserved hypotheticals                 |
| Rv3455c | 22 | 11 | 1,595178918 information pathways                    |
| Rv3104c | 23 | 11 | 1,608291251 cell wall and cell processes            |
| Rv1830  | 23 | 11 | 1,608291251 conserved hypotheticals                 |
| Rv2460c | 54 | 25 | 1,612487323 intermediary metabolism and respiration |
| Rv0169  | 26 | 9  | 1,617188655 virulence, detoxification, adaptation   |
| Rv1636  | 26 | 9  | 1,617188655 virulence, detoxification, adaptation   |
| Rv2881c | 26 | 9  | 1,617188655 lipid metabolism                        |
| Rv2438c | 26 | 9  | 1,617188655 intermediary metabolism and respiration |
| Rv3142c | 27 | 9  | 1,616949406 conserved hypotheticals                 |
| Rv0639  | 59 | 22 | 1,617794158 information pathways                    |
| Rv2146c | 62 | 23 | 1,630164325 cell wall and cell processes            |
| Rv3866  | 26 | 12 | 1,640038304 cell wall and cell processes            |
| Rv2841c | 29 | 10 | 1,639516591 information pathways                    |

|         |    |    |                                                     |
|---------|----|----|-----------------------------------------------------|
| Rv1085c | 6  | 3  | 1,643960638 virulence, detoxification, adaptation   |
| Rv1114  | 6  | 3  | 1,643960638 virulence, detoxification, adaptation   |
| Rv0533c | 6  | 3  | 1,643960638 lipid metabolism                        |
| Rv0401  | 6  | 3  | 1,643960638 cell wall and cell processes            |
| Rv0900  | 6  | 3  | 1,643960638 cell wall and cell processes            |
| Rv1159  | 6  | 3  | 1,643960638 cell wall and cell processes            |
| Rv2399c | 6  | 3  | 1,643960638 cell wall and cell processes            |
| Rv3332  | 6  | 3  | 1,643960638 cell wall and cell processes            |
| Rv3482c | 6  | 3  | 1,643960638 cell wall and cell processes            |
| Rv3857c | 6  | 3  | 1,643960638 cell wall and cell processes            |
| Rv3884c | 6  | 3  | 1,643960638 cell wall and cell processes            |
| Rv3508  | 6  | 3  | 1,643960638 PE/PPE                                  |
| Rv0111  | 6  | 3  | 1,643960638 intermediary metabolism and respiration |
| Rv0245  | 6  | 3  | 1,643960638 intermediary metabolism and respiration |
| Rv0357c | 6  | 3  | 1,643960638 intermediary metabolism and respiration |
| Rv0478  | 6  | 3  | 1,643960638 intermediary metabolism and respiration |
| Rv1279  | 6  | 3  | 1,643960638 intermediary metabolism and respiration |
| Rv1731  | 6  | 3  | 1,643960638 intermediary metabolism and respiration |
| Rv2531c | 6  | 3  | 1,643960638 intermediary metabolism and respiration |
| Rv2672  | 6  | 3  | 1,643960638 intermediary metabolism and respiration |
| Rv3314c | 6  | 3  | 1,643960638 intermediary metabolism and respiration |
| Rv3634c | 6  | 3  | 1,643960638 intermediary metabolism and respiration |
| Rv1909c | 6  | 3  | 1,643960638 regulatory proteins                     |
| Rv0029  | 6  | 3  | 1,643960638 conserved hypotheticals                 |
| Rv1314c | 6  | 3  | 1,643960638 conserved hypotheticals                 |
| Rv1507c | 6  | 3  | 1,643960638 conserved hypotheticals                 |
| Rv3120  | 6  | 3  | 1,643960638 conserved hypotheticals                 |
| Rv3256c | 6  | 3  | 1,643960638 conserved hypotheticals                 |
| Rv2995c | 27 | 13 | 1,624145389 intermediary metabolism and respiration |
| Rv0587  | 8  | 2  | 1,633438939 virulence, detoxification, adaptation   |
| Rv0589  | 8  | 2  | 1,633438939 virulence, detoxification, adaptation   |
| Rv0972c | 8  | 2  | 1,633438939 lipid metabolism                        |
| Rv1058  | 8  | 2  | 1,633438939 lipid metabolism                        |
| Rv3544c | 8  | 2  | 1,633438939 lipid metabolism                        |

|         |    |    |                                                     |
|---------|----|----|-----------------------------------------------------|
| Rv1253  | 8  | 2  | 1,633438939 information pathways                    |
| Rv1259  | 8  | 2  | 1,633438939 information pathways                    |
| Rv2845c | 8  | 2  | 1,633438939 information pathways                    |
| Rv0205  | 8  | 2  | 1,633438939 cell wall and cell processes            |
| Rv0537c | 8  | 2  | 1,633438939 cell wall and cell processes            |
| Rv1280c | 8  | 2  | 1,633438939 cell wall and cell processes            |
| Rv1496  | 8  | 2  | 1,633438939 cell wall and cell processes            |
| Rv3451  | 8  | 2  | 1,633438939 cell wall and cell processes            |
| Rv3593  | 8  | 2  | 1,633438939 cell wall and cell processes            |
| Rv3795  | 8  | 2  | 1,633438939 cell wall and cell processes            |
| Rv0795  | 8  | 2  | 1,633438939 insertion seqs and phages               |
| Rv3186  | 8  | 2  | 1,633438939 insertion seqs and phages               |
| Rv0303  | 8  | 2  | 1,633438939 intermediary metabolism and respiration |
| Rv0688  | 8  | 2  | 1,633438939 intermediary metabolism and respiration |
| Rv0946c | 8  | 2  | 1,633438939 intermediary metabolism and respiration |
| Rv1471  | 8  | 2  | 1,633438939 intermediary metabolism and respiration |
| Rv1538c | 8  | 2  | 1,633438939 intermediary metabolism and respiration |
| Rv3339c | 8  | 2  | 1,633438939 intermediary metabolism and respiration |
| Rv3628  | 8  | 2  | 1,633438939 intermediary metabolism and respiration |
| Rv0367c | 8  | 2  | 1,633438939 conserved hypotheticals                 |
| Rv0839  | 8  | 2  | 1,633438939 conserved hypotheticals                 |
| Rv1126c | 8  | 2  | 1,633438939 conserved hypotheticals                 |
| Rv1278  | 8  | 2  | 1,633438939 conserved hypotheticals                 |
| Rv1287  | 8  | 2  | 1,633438939 conserved hypotheticals                 |
| Rv1645c | 8  | 2  | 1,633438939 conserved hypotheticals                 |
| Rv2513  | 8  | 2  | 1,633438939 conserved hypotheticals                 |
| Rv2728c | 8  | 2  | 1,633438939 conserved hypotheticals                 |
| Rv3369  | 8  | 2  | 1,633438939 conserved hypotheticals                 |
| Rv3909  | 8  | 2  | 1,633438939 conserved hypotheticals                 |
| Rv0486  | 28 | 13 | 1,610379097 intermediary metabolism and respiration |
| Rv3147  | 32 | 11 | 1,618438247 intermediary metabolism and respiration |
| Rv1222  | 71 | 27 | 1,622544602 information pathways                    |
| Rv2377c | 7  | 4  | 1,624456258 lipid metabolism                        |
| Rv3061c | 7  | 4  | 1,624456258 lipid metabolism                        |

|         |    |    |                                                     |
|---------|----|----|-----------------------------------------------------|
| Rv1210  | 7  | 4  | 1,624456258 information pathways                    |
| Rv2343c | 7  | 4  | 1,624456258 information pathways                    |
| Rv0037c | 7  | 4  | 1,624456258 cell wall and cell processes            |
| Rv0237  | 7  | 4  | 1,624456258 cell wall and cell processes            |
| Rv2151c | 7  | 4  | 1,624456258 cell wall and cell processes            |
| Rv0606  | 7  | 4  | 1,624456258 insertion seqs and phages               |
| Rv0741  | 7  | 4  | 1,624456258 insertion seqs and phages               |
| Rv0186  | 7  | 4  | 1,624456258 intermediary metabolism and respiration |
| Rv1412  | 7  | 4  | 1,624456258 intermediary metabolism and respiration |
| Rv2847c | 7  | 4  | 1,624456258 intermediary metabolism and respiration |
| Rv2988c | 7  | 4  | 1,624456258 intermediary metabolism and respiration |
| Rv3057c | 7  | 4  | 1,624456258 intermediary metabolism and respiration |
| Rv3400  | 7  | 4  | 1,624456258 intermediary metabolism and respiration |
| Rv3419c | 7  | 4  | 1,624456258 intermediary metabolism and respiration |
| Rv0153c | 7  | 4  | 1,624456258 regulatory proteins                     |
| Rv3095  | 7  | 4  | 1,624456258 regulatory proteins                     |
| Rv3575c | 7  | 4  | 1,624456258 regulatory proteins                     |
| Rv2018  | 7  | 4  | 1,624456258 conserved hypotheticals                 |
| Rv2260  | 7  | 4  | 1,624456258 conserved hypotheticals                 |
| Rv2516c | 7  | 4  | 1,624456258 conserved hypotheticals                 |
| Rv3385c | 30 | 14 | 1,609670258 virulence, detoxification, adaptation   |
| Rv1294  | 30 | 14 | 1,609670258 intermediary metabolism and respiration |
| Rv1598c | 32 | 15 | 1,624304945 conserved hypotheticals                 |
| Rv1437  | 36 | 13 | 1,635730184 intermediary metabolism and respiration |
| Rv2373c | 34 | 16 | 1,638480805 virulence, detoxification, adaptation   |
| Rv2596  | 8  | 4  | 1,638414248 virulence, detoxification, adaptation   |
| Rv3234c | 8  | 4  | 1,638414248 lipid metabolism                        |
| Rv1010  | 8  | 4  | 1,638414248 information pathways                    |
| Rv0203  | 8  | 4  | 1,638414248 cell wall and cell processes            |
| Rv0343  | 8  | 4  | 1,638414248 cell wall and cell processes            |
| Rv0541c | 8  | 4  | 1,638414248 cell wall and cell processes            |
| Rv1648  | 8  | 4  | 1,638414248 cell wall and cell processes            |
| Rv3689  | 8  | 4  | 1,638414248 cell wall and cell processes            |
| Rv2648  | 8  | 4  | 1,638414248 insertion seqs and phages               |

|         |    |    |                                                     |
|---------|----|----|-----------------------------------------------------|
| Rv1604  | 8  | 4  | 1,638414248 intermediary metabolism and respiration |
| Rv2095c | 8  | 4  | 1,638414248 intermediary metabolism and respiration |
| Rv2207  | 8  | 4  | 1,638414248 intermediary metabolism and respiration |
| Rv2535c | 8  | 4  | 1,638414248 intermediary metabolism and respiration |
| Rv2715  | 8  | 4  | 1,638414248 intermediary metabolism and respiration |
| Rv2860c | 8  | 4  | 1,638414248 intermediary metabolism and respiration |
| Rv1341  | 8  | 4  | 1,638414248 conserved hypotheticals                 |
| Rv2047c | 8  | 4  | 1,638414248 conserved hypotheticals                 |
| Rv2083  | 8  | 4  | 1,638414248 conserved hypotheticals                 |
| Rv2411c | 8  | 4  | 1,638414248 conserved hypotheticals                 |
| Rv2474c | 8  | 4  | 1,638414248 conserved hypotheticals                 |
| Rv3226c | 8  | 4  | 1,638414248 conserved hypotheticals                 |
| Rv3492c | 8  | 4  | 1,638414248 conserved hypotheticals                 |
| Rv3850  | 8  | 4  | 1,638414248 conserved hypotheticals                 |
| Rv0563  | 38 | 14 | 1,634541324 virulence, detoxification, adaptation   |
| Rv0248c | 38 | 14 | 1,634541324 intermediary metabolism and respiration |
| Rv2583c | 39 | 14 | 1,634627237 intermediary metabolism and respiration |
| Rv3264c | 37 | 17 | 1,639273034 cell wall and cell processes            |
| Rv1960c | 10 | 3  | 1,641560864 virulence, detoxification, adaptation   |
| Rv3100c | 10 | 3  | 1,641560864 virulence, detoxification, adaptation   |
| Rv0644c | 10 | 3  | 1,641560864 lipid metabolism                        |
| Rv2724c | 10 | 3  | 1,641560864 lipid metabolism                        |
| Rv3336c | 10 | 3  | 1,641560864 information pathways                    |
| Rv1861  | 10 | 3  | 1,641560864 cell wall and cell processes            |
| Rv2120c | 10 | 3  | 1,641560864 cell wall and cell processes            |
| Rv2518c | 10 | 3  | 1,641560864 cell wall and cell processes            |
| Rv2691  | 10 | 3  | 1,641560864 cell wall and cell processes            |
| Rv2885c | 10 | 3  | 1,641560864 insertion seqs and phages               |
| Rv3474  | 10 | 3  | 1,641560864 insertion seqs and phages               |
| Rv1818c | 10 | 3  | 1,641560864 PE/PPE                                  |
| Rv2340c | 10 | 3  | 1,641560864 PE/PPE                                  |
| Rv1296  | 10 | 3  | 1,641560864 intermediary metabolism and respiration |
| Rv1335  | 10 | 3  | 1,641560864 intermediary metabolism and respiration |
| Rv1699  | 10 | 3  | 1,641560864 intermediary metabolism and respiration |

|         |    |    |                                                     |
|---------|----|----|-----------------------------------------------------|
| Rv2208  | 10 | 3  | 1,641560864 intermediary metabolism and respiration |
| Rv2857c | 10 | 3  | 1,641560864 intermediary metabolism and respiration |
| Rv3853  | 10 | 3  | 1,641560864 regulatory proteins                     |
| Rv0047c | 10 | 3  | 1,641560864 conserved hypotheticals                 |
| Rv0123  | 10 | 3  | 1,641560864 conserved hypotheticals                 |
| Rv0312  | 10 | 3  | 1,641560864 conserved hypotheticals                 |
| Rv0712  | 10 | 3  | 1,641560864 conserved hypotheticals                 |
| Rv1769  | 10 | 3  | 1,641560864 conserved hypotheticals                 |
| Rv2079  | 10 | 3  | 1,641560864 conserved hypotheticals                 |
| Rv2749  | 10 | 3  | 1,641560864 conserved hypotheticals                 |
| Rv3651  | 10 | 3  | 1,641560864 conserved hypotheticals                 |
| Rv1899c | 40 | 15 | 1,628347225 cell wall and cell processes            |
| Rv3873  | 40 | 15 | 1,628347225 PE/PPE                                  |
| Rv2362c | 11 | 3  | 1,627380546 information pathways                    |
| Rv0199  | 11 | 3  | 1,627380546 cell wall and cell processes            |
| Rv1042c | 11 | 3  | 1,627380546 insertion seqs and phages               |
| Rv0198c | 11 | 3  | 1,627380546 intermediary metabolism and respiration |
| Rv0913c | 11 | 3  | 1,627380546 intermediary metabolism and respiration |
| Rv0566c | 11 | 3  | 1,627380546 conserved hypotheticals                 |
| Rv0854  | 11 | 3  | 1,627380546 conserved hypotheticals                 |
| Rv1083  | 11 | 3  | 1,627380546 conserved hypotheticals                 |
| Rv1194c | 11 | 3  | 1,627380546 conserved hypotheticals                 |
| Rv1766  | 11 | 3  | 1,627380546 conserved hypotheticals                 |
| Rv2315c | 11 | 3  | 1,627380546 conserved hypotheticals                 |
| Rv2326c | 39 | 18 | 1,622724246 cell wall and cell processes            |
| Rv2908c | 44 | 16 | 1,633810696 conserved hypotheticals                 |
| Rv1560  | 10 | 5  | 1,636690624 virulence, detoxification, adaptation   |
| Rv1425  | 10 | 5  | 1,636690624 lipid metabolism                        |
| Rv1679  | 10 | 5  | 1,636690624 lipid metabolism                        |
| Rv2982c | 10 | 5  | 1,636690624 lipid metabolism                        |
| Rv1536  | 10 | 5  | 1,636690624 information pathways                    |
| Rv3894c | 10 | 5  | 1,636690624 cell wall and cell processes            |
| Rv2651c | 10 | 5  | 1,636690624 insertion seqs and phages               |
| Rv1569  | 10 | 5  | 1,636690624 intermediary metabolism and respiration |

|         |     |    |                                                     |
|---------|-----|----|-----------------------------------------------------|
| Rv1820  | 10  | 5  | 1,636690624 intermediary metabolism and respiration |
| Rv1900c | 10  | 5  | 1,636690624 intermediary metabolism and respiration |
| Rv2218  | 10  | 5  | 1,636690624 intermediary metabolism and respiration |
| Rv3232c | 10  | 5  | 1,636690624 intermediary metabolism and respiration |
| Rv3302c | 10  | 5  | 1,636690624 intermediary metabolism and respiration |
| Rv3548c | 10  | 5  | 1,636690624 intermediary metabolism and respiration |
| Rv0744c | 10  | 5  | 1,636690624 regulatory proteins                     |
| Rv1060  | 10  | 5  | 1,636690624 conserved hypotheticals                 |
| Rv1171  | 10  | 5  | 1,636690624 conserved hypotheticals                 |
| Rv1421  | 10  | 5  | 1,636690624 conserved hypotheticals                 |
| Rv3735  | 10  | 5  | 1,636690624 conserved hypotheticals                 |
| Rv0718  | 97  | 43 | 1,627981145 information pathways                    |
| Rv0309  | 45  | 17 | 1,630005637 cell wall and cell processes            |
| Rv0247c | 45  | 20 | 1,639528175 intermediary metabolism and respiration |
| Rv0824c | 190 | 76 | 1,640713157 lipid metabolism                        |
| Rv0733  | 46  | 21 | 1,641688992 intermediary metabolism and respiration |
| Rv1419  | 47  | 21 | 1,645784964 conserved hypotheticals                 |
| Rv3498c | 12  | 4  | 1,645925945 virulence, detoxification, adaptation   |
| Rv0064  | 12  | 4  | 1,645925945 cell wall and cell processes            |
| Rv0676c | 12  | 4  | 1,645925945 cell wall and cell processes            |
| Rv2876  | 12  | 4  | 1,645925945 cell wall and cell processes            |
| Rv1576c | 12  | 4  | 1,645925945 insertion seqs and phages               |
| Rv0280  | 12  | 4  | 1,645925945 PE/PPE                                  |
| Rv0889c | 12  | 4  | 1,645925945 intermediary metabolism and respiration |
| Rv2192c | 12  | 4  | 1,645925945 intermediary metabolism and respiration |
| Rv3883c | 12  | 4  | 1,645925945 intermediary metabolism and respiration |
| Rv2390c | 12  | 4  | 1,645925945 conserved hypotheticals                 |
| Rv2956  | 12  | 4  | 1,645925945 conserved hypotheticals                 |
| Rv3626c | 12  | 4  | 1,645925945 conserved hypotheticals                 |
| Rv3580c | 13  | 4  | 1,638089557 information pathways                    |
| Rv0519c | 13  | 4  | 1,638089557 cell wall and cell processes            |
| Rv1315  | 13  | 4  | 1,638089557 cell wall and cell processes            |
| Rv1473  | 13  | 4  | 1,638089557 cell wall and cell processes            |
| Rv3695  | 13  | 4  | 1,638089557 cell wall and cell processes            |

|         |    |    |                                                     |
|---------|----|----|-----------------------------------------------------|
| Rv0458  | 13 | 4  | 1,638089557 intermediary metabolism and respiration |
| Rv1882c | 13 | 4  | 1,638089557 intermediary metabolism and respiration |
| Rv3549c | 13 | 4  | 1,638089557 intermediary metabolism and respiration |
| Rv3606c | 13 | 4  | 1,638089557 intermediary metabolism and respiration |
| Rv0758  | 13 | 4  | 1,638089557 regulatory proteins                     |
| Rv2413c | 13 | 4  | 1,638089557 conserved hypotheticals                 |
| Rv3267  | 13 | 4  | 1,638089557 conserved hypotheticals                 |
| Rv3311  | 13 | 4  | 1,638089557 conserved hypotheticals                 |
| Rv2940c | 51 | 19 | 1,632535438 lipid metabolism                        |
| Rv1097c | 12 | 6  | 1,638440864 cell wall and cell processes            |
| Rv2963  | 12 | 6  | 1,638440864 cell wall and cell processes            |
| Rv1327c | 12 | 6  | 1,638440864 intermediary metabolism and respiration |
| Rv1713  | 12 | 6  | 1,638440864 intermediary metabolism and respiration |
| Rv1063c | 12 | 6  | 1,638440864 conserved hypotheticals                 |
| Rv1924c | 12 | 6  | 1,638440864 conserved hypotheticals                 |
| Rv3213c | 53 | 20 | 1,636831152 cell wall and cell processes            |
| Rv1990c | 56 | 21 | 1,646410104 regulatory proteins                     |
| Rv1410c | 54 | 24 | 1,649009437 cell wall and cell processes            |
| Rv2110c | 54 | 24 | 1,649009437 intermediary metabolism and respiration |
| Rv2523c | 13 | 6  | 1,649489413 lipid metabolism                        |
| Rv0012  | 13 | 6  | 1,649489413 cell wall and cell processes            |
| Rv1881c | 13 | 6  | 1,649489413 cell wall and cell processes            |
| Rv2051c | 13 | 6  | 1,649489413 cell wall and cell processes            |
| Rv3244c | 13 | 6  | 1,649489413 cell wall and cell processes            |
| Rv0922  | 13 | 6  | 1,649489413 insertion seqs and phages               |
| Rv0958  | 13 | 6  | 1,649489413 intermediary metabolism and respiration |
| Rv2112c | 13 | 6  | 1,649489413 intermediary metabolism and respiration |
| Rv1423  | 13 | 6  | 1,649489413 regulatory proteins                     |
| Rv0609A | 13 | 6  | 1,649489413 conserved hypotheticals                 |
| Rv0628c | 13 | 6  | 1,649489413 conserved hypotheticals                 |
| Rv1422  | 13 | 6  | 1,649489413 conserved hypotheticals                 |
| Rv2149c | 13 | 6  | 1,649489413 conserved hypotheticals                 |
| Rv1082  | 15 | 5  | 1,64780107 virulence, detoxification, adaptation    |
| Rv2890c | 15 | 5  | 1,64780107 information pathways                     |



|         |    |    |                                                     |
|---------|----|----|-----------------------------------------------------|
| Rv0102  | 15 | 5  | 1,64780107 cell wall and cell processes             |
| Rv0066c | 15 | 5  | 1,64780107 intermediary metabolism and respiration  |
| Rv2217  | 15 | 5  | 1,64780107 intermediary metabolism and respiration  |
| Rv2844  | 15 | 5  | 1,64780107 conserved hypotheticals                  |
| Rv3300c | 15 | 5  | 1,64780107 conserved hypotheticals                  |
| Rv0588  | 16 | 5  | 1,647946678 virulence, detoxification, adaptation   |
| Rv0470c | 16 | 5  | 1,647946678 lipid metabolism                        |
| Rv0544c | 16 | 5  | 1,647946678 cell wall and cell processes            |
| Rv2585c | 16 | 5  | 1,647946678 cell wall and cell processes            |
| Rv3722c | 16 | 5  | 1,647946678 conserved hypotheticals                 |
| Rv2329c | 15 | 7  | 1,656132542 cell wall and cell processes            |
| Rv0515  | 15 | 7  | 1,656132542 insertion seqs and phages               |
| Rv1121  | 15 | 7  | 1,656132542 intermediary metabolism and respiration |
| Rv1409  | 15 | 7  | 1,656132542 intermediary metabolism and respiration |
| Rv1480  | 15 | 7  | 1,656132542 conserved hypotheticals                 |
| Rv3046c | 15 | 7  | 1,656132542 conserved hypotheticals                 |
| Rv3774  | 63 | 28 | 1,654907064 lipid metabolism                        |
| Rv3679  | 63 | 28 | 1,654907064 cell wall and cell processes            |
| Rv0877  | 63 | 28 | 1,654907064 conserved hypotheticals                 |
| Rv1483  | 17 | 6  | 1,661974062 lipid metabolism                        |
| Rv0002  | 17 | 6  | <b>1,661974062</b> information pathways             |
| Rv3211  | 17 | 6  | 1,661974062 information pathways                    |
| Rv3240c | 17 | 6  | 1,661974062 cell wall and cell processes            |
| Rv3547  | 17 | 6  | 1,661974062 intermediary metabolism and respiration |
| Rv2580c | 18 | 6  | 1,660003337 information pathways                    |
| Rv3646c | 18 | 6  | 1,660003337 information pathways                    |
| Rv0419  | 18 | 6  | 1,660003337 cell wall and cell processes            |
| Rv1249c | 18 | 6  | 1,660003337 cell wall and cell processes            |
| Rv3335c | 18 | 6  | 1,660003337 cell wall and cell processes            |
| Rv0777  | 18 | 6  | 1,660003337 intermediary metabolism and respiration |
| Rv1248c | 18 | 6  | 1,660003337 intermediary metabolism and respiration |
| Rv1606  | 18 | 6  | 1,660003337 intermediary metabolism and respiration |
| Rv2702  | 18 | 6  | 1,660003337 intermediary metabolism and respiration |
| Rv3275c | 18 | 6  | 1,660003337 intermediary metabolism and respiration |

|         |    |    |                                                     |
|---------|----|----|-----------------------------------------------------|
| Rv0135c | 18 | 6  | 1,660003337 regulatory proteins                     |
| Rv3173c | 18 | 6  | 1,660003337 regulatory proteins                     |
| Rv0185  | 17 | 8  | 1,659158607 conserved hypotheticals                 |
| Rv2101  | 18 | 8  | 1,670520891 information pathways                    |
| Rv2905  | 18 | 8  | 1,670520891 cell wall and cell processes            |
| Rv3636  | 18 | 8  | 1,670520891 insertion seqs and phages               |
| Rv1074c | 20 | 7  | 1,670297291 lipid metabolism                        |
| Rv2503c | 20 | 7  | 1,670297291 lipid metabolism                        |
| Rv0562  | 20 | 7  | 1,670297291 intermediary metabolism and respiration |
| Rv1333  | 20 | 7  | 1,670297291 intermediary metabolism and respiration |
| Rv3009c | 19 | 9  | 1,6718 information pathways                         |
| Rv3287c | 19 | 9  | 1,6718 information pathways                         |
| Rv1224  | 19 | 9  | 1,6718 cell wall and cell processes                 |
| Rv0646c | 19 | 9  | 1,6718 intermediary metabolism and respiration      |
| Rv2068c | 19 | 9  | 1,6718 intermediary metabolism and respiration      |
| Rv0932c | 81 | 32 | 1,67062772 cell wall and cell processes             |
| Rv3715c | 20 | 9  | 1,676139911 information pathways                    |
| Rv2782c | 20 | 9  | 1,676139911 intermediary metabolism and respiration |
| Rv0168  | 22 | 8  | 1,680572233 virulence, detoxification, adaptation   |
| Rv3158  | 22 | 8  | 1,680572233 intermediary metabolism and respiration |
| Rv0477  | 23 | 8  | 1,681212706 cell wall and cell processes            |
| Rv2942  | 23 | 8  | 1,681212706 cell wall and cell processes            |
| Rv2419c | 23 | 8  | 1,681212706 intermediary metabolism and respiration |
| Rv3716c | 23 | 8  | 1,681212706 conserved hypotheticals                 |
| Rv3782  | 22 | 10 | 1,68428045 cell wall and cell processes             |
| Rv1352  | 22 | 10 | 1,68428045 conserved hypotheticals                  |
| Rv3688c | 22 | 10 | 1,68428045 conserved hypotheticals                  |
| Rv1476  | 24 | 9  | 1,690597193 cell wall and cell processes            |
| Rv0285  | 95 | 41 | 1,690597193 PE/PPE                                  |
| Rv3915  | 24 | 9  | 1,690597193 intermediary metabolism and respiration |
| Rv3674c | 25 | 9  | 1,688764437 information pathways                    |
| Rv1789  | 25 | 9  | 1,688764437 PE/PPE                                  |
| Rv1821  | 24 | 11 | 1,691179432 cell wall and cell processes            |
| Rv2975c | 24 | 11 | 1,691179432 conserved hypotheticals                 |

|         |     |    |                                                     |
|---------|-----|----|-----------------------------------------------------|
| Rv3258c | 24  | 11 | 1,691179432 conserved hypotheticals                 |
| Rv0483  | 25  | 11 | 1,695883693 cell wall and cell processes            |
| Rv0382c | 25  | 11 | 1,695883693 intermediary metabolism and respiration |
| Rv0939  | 25  | 11 | 1,695883693 intermediary metabolism and respiration |
| Rv2131c | 25  | 11 | 1,695883693 intermediary metabolism and respiration |
| Rv2946c | 27  | 10 | 1,695746688 lipid metabolism                        |
| Rv2199c | 28  | 10 | 1,69704635 cell wall and cell processes             |
| Rv1451  | 28  | 10 | 1,69704635 intermediary metabolism and respiration  |
| Rv3778c | 28  | 10 | 1,69704635 intermediary metabolism and respiration  |
| Rv2241  | 27  | 12 | 1,699952271 intermediary metabolism and respiration |
| Rv0282  | 113 | 45 | 1,699472561 cell wall and cell processes            |
| Rv2888c | 29  | 11 | 1,70352914 intermediary metabolism and respiration  |
| Rv3224  | 29  | 11 | 1,70352914 intermediary metabolism and respiration  |
| Rv3224A | 29  | 11 | 1,70352914 conserved hypotheticals                  |
| Rv2605c | 30  | 11 | 1,70228501 lipid metabolism                         |
| Rv1264  | 29  | 13 | 1,704758824 intermediary metabolism and respiration |
| Rv1697  | 30  | 13 | 1,709789352 conserved hypotheticals                 |
| Rv2154c | 32  | 12 | 1,709897299 cell wall and cell processes            |
| Rv1391  | 31  | 14 | 1,711381818 intermediary metabolism and respiration |
| Rv3708c | 31  | 14 | 1,711381818 intermediary metabolism and respiration |
| Rv2632c | 31  | 14 | 1,711381818 conserved hypotheticals                 |
| Rv0038  | 32  | 14 | 1,713471134 conserved hypotheticals                 |
| Rv3847  | 34  | 13 | 1,715540943 conserved hypotheticals                 |
| Rv3283  | 35  | 13 | 1,716038906 intermediary metabolism and respiration |
| Rv0207c | 34  | 15 | 1,718302257 conserved hypotheticals                 |
| Rv2711  | 142 | 57 | 1,718602613 regulatory proteins                     |
| Rv3680  | 37  | 14 | 1,721451286 cell wall and cell processes            |
| Rv3076  | 36  | 14 | 1,721451286 conserved hypotheticals                 |
| Rv3376  | 37  | 14 | 1,721451286 conserved hypotheticals                 |
| Rv2697c | 36  | 16 | 1,721563953 intermediary metabolism and respiration |
| Rv0426c | 37  | 16 | 1,724602687 cell wall and cell processes            |
| Rv1737c | 37  | 16 | 1,724602687 cell wall and cell processes            |
| Rv1479  | 37  | 16 | 1,724602687 regulatory proteins                     |
| Rv2030c | 39  | 15 | 1,72392944 conserved hypotheticals                  |

|         |     |    |                                                     |
|---------|-----|----|-----------------------------------------------------|
| Rv0706  | 39  | 17 | 1,727353294 information pathways                    |
| Rv2838c | 44  | 17 | 1,73585347 information pathways                     |
| Rv3043c | 46  | 18 | 1,740636815 intermediary metabolism and respiration |
| Rv0242c | 51  | 22 | 1,75302892 lipid metabolism                         |
| Rv2883c | 51  | 22 | 1,75302892 intermediary metabolism and respiration  |
| Rv0383c | 54  | 21 | 1,753794016 cell wall and cell processes            |
| Rv3763  | 60  | 24 | 1,764996537 cell wall and cell processes            |
| Rv2239c | 60  | 26 | 1,765471518 conserved hypotheticals                 |
| Rv3001c | 61  | 26 | 1,766530554 intermediary metabolism and respiration |
| Rv2195  | 80  | 34 | 1,788425157 intermediary metabolism and respiration |
| Rv2196  | 97  | 39 | 1,800764401 intermediary metabolism and respiration |
| Rv2710  | 106 | 43 | 1,80667282 information pathways                     |
| Rv2441c | 113 | 46 | 1,810437063 information pathways                    |
| Rv0641  | 139 | 59 | 1,823336421 information pathways                    |
| Rv0065  | 4   | 2  | 1,943507258 virulence, detoxification, adaptation   |
| Rv0240  | 3   | 1  | 1,943507258 virulence, detoxification, adaptation   |
| Rv0262c | 11  | 4  | 1,943507258 virulence, detoxification, adaptation   |
| Rv0300  | 58  | 24 | 1,943507258 virulence, detoxification, adaptation   |
| Rv0456A | 0   | 0  | 1,943507258 virulence, detoxification, adaptation   |
| Rv0549c | 5   | 2  | 1,943507258 virulence, detoxification, adaptation   |
| Rv0550c | 7   | 3  | 1,943507258 virulence, detoxification, adaptation   |
| Rv0590A | 0   | 0  | 1,943507258 virulence, detoxification, adaptation   |
| Rv0591  | 0   | 0  | 1,943507258 virulence, detoxification, adaptation   |
| Rv0592  | 1   | 0  | 1,943507258 virulence, detoxification, adaptation   |
| Rv0595c | 2   | 0  | 1,943507258 virulence, detoxification, adaptation   |
| Rv0634c | 30  | 12 | 1,943507258 virulence, detoxification, adaptation   |
| Rv0656c | 2   | 1  | 1,943507258 virulence, detoxification, adaptation   |
| Rv0661c | 1   | 0  | 1,943507258 virulence, detoxification, adaptation   |
| Rv0662c | 1   | 0  | 1,943507258 virulence, detoxification, adaptation   |
| Rv0748  | 5   | 2  | 1,943507258 virulence, detoxification, adaptation   |
| Rv1124  | 7   | 2  | 1,943507258 virulence, detoxification, adaptation   |
| Rv1242  | 3   | 1  | 1,943507258 virulence, detoxification, adaptation   |
| Rv1246c | 2   | 0  | 1,943507258 virulence, detoxification, adaptation   |
| Rv1477  | 19  | 7  | 1,943507258 virulence, detoxification, adaptation   |

|         |    |   |                                                   |
|---------|----|---|---------------------------------------------------|
| Rv1494  | 4  | 1 | 1,943507258 virulence, detoxification, adaptation |
| Rv1495  | 2  | 0 | 1,943507258 virulence, detoxification, adaptation |
| Rv1563c | 2  | 1 | 1,943507258 virulence, detoxification, adaptation |
| Rv1564c | 4  | 2 | 1,943507258 virulence, detoxification, adaptation |
| Rv1720c | 1  | 0 | 1,943507258 virulence, detoxification, adaptation |
| Rv1721c | 2  | 1 | 1,943507258 virulence, detoxification, adaptation |
| Rv1740  | 9  | 4 | 1,943507258 virulence, detoxification, adaptation |
| Rv1901  | 9  | 4 | 1,943507258 virulence, detoxification, adaptation |
| Rv1955  | 2  | 1 | 1,943507258 virulence, detoxification, adaptation |
| Rv1962c | 3  | 1 | 1,943507258 virulence, detoxification, adaptation |
| Rv1964  | 2  | 0 | 1,943507258 virulence, detoxification, adaptation |
| Rv1966  | 1  | 0 | 1,943507258 virulence, detoxification, adaptation |
| Rv1967  | 0  | 0 | 1,943507258 virulence, detoxification, adaptation |
| Rv1968  | 0  | 0 | 1,943507258 virulence, detoxification, adaptation |
| Rv1969  | 0  | 0 | 1,943507258 virulence, detoxification, adaptation |
| Rv1971  | 1  | 0 | 1,943507258 virulence, detoxification, adaptation |
| Rv2006  | 3  | 1 | 1,943507258 virulence, detoxification, adaptation |
| Rv2063  | 6  | 2 | 1,943507258 virulence, detoxification, adaptation |
| Rv2142c | 3  | 1 | 1,943507258 virulence, detoxification, adaptation |
| Rv2274c | 1  | 0 | 1,943507258 virulence, detoxification, adaptation |
| Rv2299c | 15 | 6 | 1,943507258 virulence, detoxification, adaptation |
| Rv2319c | 2  | 1 | 1,943507258 virulence, detoxification, adaptation |
| Rv2416c | 2  | 1 | 1,943507258 virulence, detoxification, adaptation |
| Rv2428  | 4  | 1 | 1,943507258 virulence, detoxification, adaptation |
| Rv2429  | 3  | 1 | 1,943507258 virulence, detoxification, adaptation |
| Rv2526  | 2  | 0 | 1,943507258 virulence, detoxification, adaptation |
| Rv2545  | 0  | 0 | 1,943507258 virulence, detoxification, adaptation |
| Rv2548  | 2  | 1 | 1,943507258 virulence, detoxification, adaptation |
| Rv2549c | 4  | 2 | 1,943507258 virulence, detoxification, adaptation |
| Rv2758c | 0  | 0 | 1,943507258 virulence, detoxification, adaptation |
| Rv2759c | 4  | 1 | 1,943507258 virulence, detoxification, adaptation |
| Rv2863  | 0  | 0 | 1,943507258 virulence, detoxification, adaptation |
| Rv2866  | 1  | 0 | 1,943507258 virulence, detoxification, adaptation |
| Rv2872  | 2  | 0 | 1,943507258 virulence, detoxification, adaptation |

|         |    |    |                                                   |
|---------|----|----|---------------------------------------------------|
| Rv3063  | 3  | 1  | 1,943507258 virulence, detoxification, adaptation |
| Rv3082c | 1  | 0  | 1,943507258 virulence, detoxification, adaptation |
| Rv3168  | 2  | 1  | 1,943507258 virulence, detoxification, adaptation |
| Rv3171c | 38 | 15 | 1,943507258 virulence, detoxification, adaptation |
| Rv3176c | 2  | 1  | 1,943507258 virulence, detoxification, adaptation |
| Rv3177  | 0  | 0  | 1,943507258 virulence, detoxification, adaptation |
| Rv3358  | 2  | 0  | 1,943507258 virulence, detoxification, adaptation |
| Rv3372  | 4  | 1  | 1,943507258 virulence, detoxification, adaptation |
| Rv3384c | 4  | 2  | 1,943507258 virulence, detoxification, adaptation |
| Rv3417c | 11 | 4  | 1,943507258 virulence, detoxification, adaptation |
| Rv3473c | 0  | 0  | 1,943507258 virulence, detoxification, adaptation |
| Rv3497c | 8  | 3  | 1,943507258 virulence, detoxification, adaptation |
| Rv3617  | 7  | 3  | 1,943507258 virulence, detoxification, adaptation |
| Rv3660c | 4  | 2  | 1,943507258 virulence, detoxification, adaptation |
| Rv3670  | 2  | 0  | 1,943507258 virulence, detoxification, adaptation |
| Rv3756c | 15 | 6  | 1,943507258 virulence, detoxification, adaptation |
| Rv0045c | 8  | 3  | 1,943507258 lipid metabolism                      |
| Rv0088  | 23 | 9  | 1,943507258 lipid metabolism                      |
| Rv0098  | 3  | 1  | 1,943507258 lipid metabolism                      |
| Rv0131c | 2  | 0  | 1,943507258 lipid metabolism                      |
| Rv0214  | 2  | 0  | 1,943507258 lipid metabolism                      |
| Rv0215c | 4  | 1  | 1,943507258 lipid metabolism                      |
| Rv0230c | 6  | 2  | 1,943507258 lipid metabolism                      |
| Rv0456c | 1  | 0  | 1,943507258 lipid metabolism                      |
| Rv0551c | 5  | 2  | 1,943507258 lipid metabolism                      |
| Rv0557  | 4  | 2  | 1,943507258 lipid metabolism                      |
| Rv0649  | 0  | 0  | 1,943507258 lipid metabolism                      |
| Rv0726c | 7  | 2  | 1,943507258 lipid metabolism                      |
| Rv0731c | 2  | 0  | 1,943507258 lipid metabolism                      |
| Rv0830  | 3  | 1  | 1,943507258 lipid metabolism                      |
| Rv0852  | 1  | 0  | 1,943507258 lipid metabolism                      |
| Rv0873  | 23 | 9  | 1,943507258 lipid metabolism                      |
| Rv0893c | 2  | 1  | 1,943507258 lipid metabolism                      |
| Rv0895  | 1  | 0  | 1,943507258 lipid metabolism                      |

|         |    |   |                              |
|---------|----|---|------------------------------|
| Rv0904c | 1  | 0 | 1,943507258 lipid metabolism |
| Rv0971c | 3  | 1 | 1,943507258 lipid metabolism |
| Rv0973c | 2  | 1 | 1,943507258 lipid metabolism |
| Rv0974c | 2  | 1 | 1,943507258 lipid metabolism |
| Rv0975c | 3  | 1 | 1,943507258 lipid metabolism |
| Rv1135A | 1  | 0 | 1,943507258 lipid metabolism |
| Rv1136  | 0  | 0 | 1,943507258 lipid metabolism |
| Rv1141c | 2  | 1 | 1,943507258 lipid metabolism |
| Rv1142c | 19 | 7 | 1,943507258 lipid metabolism |
| Rv1143  | 4  | 2 | 1,943507258 lipid metabolism |
| Rv1153c | 2  | 0 | 1,943507258 lipid metabolism |
| Rv1175c | 5  | 2 | 1,943507258 lipid metabolism |
| Rv1344  | 14 | 6 | 1,943507258 lipid metabolism |
| Rv1347c | 1  | 0 | 1,943507258 lipid metabolism |
| Rv1427c | 3  | 1 | 1,943507258 lipid metabolism |
| Rv1467c | 3  | 1 | 1,943507258 lipid metabolism |
| Rv1492  | 6  | 2 | 1,943507258 lipid metabolism |
| Rv1493  | 6  | 2 | 1,943507258 lipid metabolism |
| Rv1527c | 5  | 2 | 1,943507258 lipid metabolism |
| Rv1549  | 2  | 0 | 1,943507258 lipid metabolism |
| Rv1551  | 1  | 0 | 1,943507258 lipid metabolism |
| Rv1660  | 4  | 1 | 1,943507258 lipid metabolism |
| Rv1664  | 4  | 2 | 1,943507258 lipid metabolism |
| Rv1715  | 1  | 0 | 1,943507258 lipid metabolism |
| Rv1722  | 2  | 1 | 1,943507258 lipid metabolism |
| Rv1729c | 1  | 0 | 1,943507258 lipid metabolism |
| Rv1750c | 2  | 1 | 1,943507258 lipid metabolism |
| Rv1760  | 2  | 1 | 1,943507258 lipid metabolism |
| Rv1866  | 1  | 0 | 1,943507258 lipid metabolism |
| Rv1867  | 2  | 1 | 1,943507258 lipid metabolism |
| Rv1933c | 0  | 0 | 1,943507258 lipid metabolism |
| Rv1934c | 0  | 0 | 1,943507258 lipid metabolism |
| Rv1935c | 1  | 0 | 1,943507258 lipid metabolism |
| Rv2002  | 7  | 2 | 1,943507258 lipid metabolism |

|         |    |   |                              |
|---------|----|---|------------------------------|
| Rv2173  | 4  | 2 | 1,943507258 lipid metabolism |
| Rv2187  | 6  | 2 | 1,943507258 lipid metabolism |
| Rv2252  | 1  | 0 | 1,943507258 lipid metabolism |
| Rv2285  | 4  | 1 | 1,943507258 lipid metabolism |
| Rv2378c | 1  | 0 | 1,943507258 lipid metabolism |
| Rv2379c | 2  | 0 | 1,943507258 lipid metabolism |
| Rv2380c | 2  | 1 | 1,943507258 lipid metabolism |
| Rv2384  | 1  | 0 | 1,943507258 lipid metabolism |
| Rv2385  | 1  | 0 | 1,943507258 lipid metabolism |
| Rv2386c | 1  | 0 | 1,943507258 lipid metabolism |
| Rv2484c | 13 | 5 | 1,943507258 lipid metabolism |
| Rv2486  | 2  | 0 | 1,943507258 lipid metabolism |
| Rv2501c | 11 | 4 | 1,943507258 lipid metabolism |
| Rv2505c | 2  | 1 | 1,943507258 lipid metabolism |
| Rv2524c | 14 | 5 | 1,943507258 lipid metabolism |
| Rv2831  | 2  | 1 | 1,943507258 lipid metabolism |
| Rv2932  | 7  | 2 | 1,943507258 lipid metabolism |
| Rv3087  | 3  | 1 | 1,943507258 lipid metabolism |
| Rv3088  | 2  | 1 | 1,943507258 lipid metabolism |
| Rv3089  | 2  | 1 | 1,943507258 lipid metabolism |
| Rv3280  | 16 | 7 | 1,943507258 lipid metabolism |
| Rv3373  | 4  | 1 | 1,943507258 lipid metabolism |
| Rv3374  | 7  | 2 | 1,943507258 lipid metabolism |
| Rv3391  | 2  | 1 | 1,943507258 lipid metabolism |
| Rv3398c | 1  | 0 | 1,943507258 lipid metabolism |
| Rv3504  | 4  | 1 | 1,943507258 lipid metabolism |
| Rv3505  | 6  | 2 | 1,943507258 lipid metabolism |
| Rv3506  | 0  | 0 | 1,943507258 lipid metabolism |
| Rv3513c | 3  | 1 | 1,943507258 lipid metabolism |
| Rv3515c | 2  | 1 | 1,943507258 lipid metabolism |
| Rv3516  | 4  | 1 | 1,943507258 lipid metabolism |
| Rv3522  | 1  | 0 | 1,943507258 lipid metabolism |
| Rv3543c | 4  | 2 | 1,943507258 lipid metabolism |
| Rv3550  | 3  | 1 | 1,943507258 lipid metabolism |



|         |     |    |                                  |
|---------|-----|----|----------------------------------|
| Rv3562  | 3   | 1  | 1,943507258 lipid metabolism     |
| Rv3563  | 2   | 0  | 1,943507258 lipid metabolism     |
| Rv3564  | 2   | 1  | 1,943507258 lipid metabolism     |
| Rv3573c | 2   | 1  | 1,943507258 lipid metabolism     |
| Rv3720  | 12  | 5  | 1,943507258 lipid metabolism     |
| Rv3790  | 2   | 1  | 1,943507258 lipid metabolism     |
| Rv3797  | 1   | 0  | 1,943507258 lipid metabolism     |
| Rv3801c | 27  | 11 | 1,943507258 lipid metabolism     |
| Rv3820c | 2   | 0  | 1,943507258 lipid metabolism     |
| Rv0001  | 3   | 1  | 1,943507258 information pathways |
| Rv0041  | 9   | 3  | 1,943507258 information pathways |
| Rv0071  | 2   | 0  | 1,943507258 information pathways |
| Rv0105c | 0   | 0  | 1,943507258 information pathways |
| Rv0182c | 9   | 4  | 1,943507258 information pathways |
| Rv0427c | 6   | 2  | 1,943507258 information pathways |
| Rv0429c | 4   | 1  | 1,943507258 information pathways |
| Rv0444c | 13  | 5  | 1,943507258 information pathways |
| Rv0630c | 2   | 1  | 1,943507258 information pathways |
| Rv0651  | 17  | 7  | 1,943507258 information pathways |
| Rv0721  | 181 | 76 | 1,943507258 information pathways |
| Rv0736  | 2   | 1  | 1,943507258 information pathways |
| Rv0938  | 19  | 7  | 1,943507258 information pathways |
| Rv0944  | 2   | 1  | 1,943507258 information pathways |
| Rv0949  | 8   | 3  | 1,943507258 information pathways |
| Rv1007c | 7   | 2  | 1,943507258 information pathways |
| Rv1020  | 7   | 3  | 1,943507258 information pathways |
| Rv1292  | 4   | 2  | 1,943507258 information pathways |
| Rv1365c | 4   | 1  | 1,943507258 information pathways |
| Rv1406  | 2   | 0  | 1,943507258 information pathways |
| Rv1407  | 4   | 2  | 1,943507258 information pathways |
| Rv1420  | 13  | 5  | 1,943507258 information pathways |
| Rv1547  | 10  | 4  | 1,943507258 information pathways |
| Rv1629  | 4   | 2  | 1,943507258 information pathways |
| Rv1640c | 4   | 1  | 1,943507258 information pathways |

|         |    |    |                                  |
|---------|----|----|----------------------------------|
| Rv1688  | 2  | 0  | 1,943507258 information pathways |
| Rv2055c | 2  | 0  | 1,943507258 information pathways |
| Rv2056c | 0  | 0  | 1,943507258 information pathways |
| Rv2057c | 1  | 0  | 1,943507258 information pathways |
| Rv2058c | 2  | 0  | 1,943507258 information pathways |
| Rv2090  | 1  | 0  | 1,943507258 information pathways |
| Rv2191  | 1  | 0  | 1,943507258 information pathways |
| Rv2464c | 6  | 2  | 1,943507258 information pathways |
| Rv2528c | 0  | 0  | 1,943507258 information pathways |
| Rv2534c | 11 | 4  | 1,943507258 information pathways |
| Rv2555c | 73 | 30 | 1,943507258 information pathways |
| Rv2572c | 9  | 3  | 1,943507258 information pathways |
| Rv2582  | 3  | 1  | 1,943507258 information pathways |
| Rv2592c | 9  | 3  | 1,943507258 information pathways |
| Rv2614c | 14 | 5  | 1,943507258 information pathways |
| Rv2755c | 4  | 2  | 1,943507258 information pathways |
| Rv2756c | 9  | 3  | 1,943507258 information pathways |
| Rv2761c | 4  | 2  | 1,943507258 information pathways |
| Rv2839c | 34 | 14 | 1,943507258 information pathways |
| Rv2882c | 34 | 14 | 1,943507258 information pathways |
| Rv2889c | 30 | 12 | 1,943507258 information pathways |
| Rv2924c | 3  | 1  | 1,943507258 information pathways |
| Rv2973c | 2  | 0  | 1,943507258 information pathways |
| Rv2976c | 7  | 2  | 1,943507258 information pathways |
| Rv2992c | 8  | 3  | 1,943507258 information pathways |
| Rv3012c | 2  | 1  | 1,943507258 information pathways |
| Rv3014c | 6  | 2  | 1,943507258 information pathways |
| Rv3056  | 2  | 1  | 1,943507258 information pathways |
| Rv3062  | 4  | 1  | 1,943507258 information pathways |
| Rv3105c | 9  | 3  | 1,943507258 information pathways |
| Rv3201c | 3  | 1  | 1,943507258 information pathways |
| Rv3202c | 3  | 1  | 1,943507258 information pathways |
| Rv3263  | 2  | 0  | 1,943507258 information pathways |
| Rv3286c | 5  | 2  | 1,943507258 information pathways |

|         |     |    |                                          |
|---------|-----|----|------------------------------------------|
| Rv3296  | 2   | 1  | 1,943507258 information pathways         |
| Rv3366  | 1   | 0  | 1,943507258 information pathways         |
| Rv3370c | 2   | 1  | 1,943507258 information pathways         |
| Rv3462c | 227 | 95 | 1,943507258 information pathways         |
| Rv3589  | 3   | 1  | 1,943507258 information pathways         |
| Rv3644c | 4   | 2  | 1,943507258 information pathways         |
| Rv3649  | 2   | 1  | 1,943507258 information pathways         |
| Rv3731  | 4   | 1  | 1,943507258 information pathways         |
| Rv3908  | 11  | 5  | 1,943507258 information pathways         |
| Rv3911  | 1   | 0  | 1,943507258 information pathways         |
| Rv0008c | 5   | 2  | 1,943507258 cell wall and cell processes |
| Rv0016c | 9   | 4  | 1,943507258 cell wall and cell processes |
| Rv0050  | 21  | 8  | 1,943507258 cell wall and cell processes |
| Rv0076c | 2   | 0  | 1,943507258 cell wall and cell processes |
| Rv0092  | 4   | 2  | 1,943507258 cell wall and cell processes |
| Rv0093c | 4   | 2  | 1,943507258 cell wall and cell processes |
| Rv0103c | 20  | 8  | 1,943507258 cell wall and cell processes |
| Rv0112  | 3   | 1  | 1,943507258 cell wall and cell processes |
| Rv0128  | 6   | 2  | 1,943507258 cell wall and cell processes |
| Rv0178  | 27  | 11 | 1,943507258 cell wall and cell processes |
| Rv0192A | 0   | 0  | 1,943507258 cell wall and cell processes |
| Rv0194  | 1   | 0  | 1,943507258 cell wall and cell processes |
| Rv0200  | 9   | 4  | 1,943507258 cell wall and cell processes |
| Rv0204c | 8   | 3  | 1,943507258 cell wall and cell processes |
| Rv0225  | 11  | 4  | 1,943507258 cell wall and cell processes |
| Rv0226c | 4   | 2  | 1,943507258 cell wall and cell processes |
| Rv0236c | 6   | 2  | 1,943507258 cell wall and cell processes |
| Rv0261c | 0   | 0  | 1,943507258 cell wall and cell processes |
| Rv0267  | 1   | 0  | 1,943507258 cell wall and cell processes |
| Rv0320  | 1   | 0  | 1,943507258 cell wall and cell processes |
| Rv0344c | 2   | 0  | 1,943507258 cell wall and cell processes |
| Rv0347  | 7   | 2  | 1,943507258 cell wall and cell processes |
| Rv0359  | 4   | 2  | 1,943507258 cell wall and cell processes |
| Rv0361  | 14  | 5  | 1,943507258 cell wall and cell processes |

|         |    |   |                                          |
|---------|----|---|------------------------------------------|
| Rv0362  | 1  | 0 | 1,943507258 cell wall and cell processes |
| Rv0398c | 6  | 2 | 1,943507258 cell wall and cell processes |
| Rv0399c | 3  | 1 | 1,943507258 cell wall and cell processes |
| Rv0402c | 2  | 1 | 1,943507258 cell wall and cell processes |
| Rv0446c | 11 | 4 | 1,943507258 cell wall and cell processes |
| Rv0488  | 0  | 0 | 1,943507258 cell wall and cell processes |
| Rv0522  | 5  | 2 | 1,943507258 cell wall and cell processes |
| Rv0528  | 9  | 4 | 1,943507258 cell wall and cell processes |
| Rv0538  | 4  | 1 | 1,943507258 cell wall and cell processes |
| Rv0556  | 21 | 8 | 1,943507258 cell wall and cell processes |
| Rv0584  | 1  | 0 | 1,943507258 cell wall and cell processes |
| Rv0585c | 1  | 0 | 1,943507258 cell wall and cell processes |
| Rv0593  | 1  | 0 | 1,943507258 cell wall and cell processes |
| Rv0603  | 0  | 0 | 1,943507258 cell wall and cell processes |
| Rv0621  | 4  | 1 | 1,943507258 cell wall and cell processes |
| Rv0622  | 2  | 0 | 1,943507258 cell wall and cell processes |
| Rv0625c | 4  | 2 | 1,943507258 cell wall and cell processes |
| Rv0666  | 2  | 1 | 1,943507258 cell wall and cell processes |
| Rv0671  | 4  | 2 | 1,943507258 cell wall and cell processes |
| Rv0680c | 2  | 1 | 1,943507258 cell wall and cell processes |
| Rv0713  | 4  | 1 | 1,943507258 cell wall and cell processes |
| Rv0779c | 1  | 0 | 1,943507258 cell wall and cell processes |
| Rv0783c | 5  | 2 | 1,943507258 cell wall and cell processes |
| Rv0817c | 2  | 1 | 1,943507258 cell wall and cell processes |
| Rv0820  | 7  | 3 | 1,943507258 cell wall and cell processes |
| Rv0835  | 2  | 1 | 1,943507258 cell wall and cell processes |
| Rv0841  | 1  | 0 | 1,943507258 cell wall and cell processes |
| Rv0842  | 3  | 1 | 1,943507258 cell wall and cell processes |
| Rv0867c | 5  | 2 | 1,943507258 cell wall and cell processes |
| Rv0882  | 3  | 1 | 1,943507258 cell wall and cell processes |
| Rv0888  | 3  | 1 | 1,943507258 cell wall and cell processes |
| Rv0899  | 2  | 1 | 1,943507258 cell wall and cell processes |
| Rv0907  | 4  | 2 | 1,943507258 cell wall and cell processes |
| Rv0908  | 8  | 3 | 1,943507258 cell wall and cell processes |

|         |    |    |                                          |
|---------|----|----|------------------------------------------|
| Rv0917  | 3  | 1  | 1,943507258 cell wall and cell processes |
| Rv0930  | 4  | 1  | 1,943507258 cell wall and cell processes |
| Rv0962c | 1  | 0  | 1,943507258 cell wall and cell processes |
| Rv0986  | 2  | 0  | 1,943507258 cell wall and cell processes |
| Rv1002c | 6  | 2  | 1,943507258 cell wall and cell processes |
| Rv1028A | 0  | 0  | 1,943507258 cell wall and cell processes |
| Rv1038c | 9  | 3  | 1,943507258 cell wall and cell processes |
| Rv1064c | 4  | 2  | 1,943507258 cell wall and cell processes |
| Rv1075c | 2  | 0  | 1,943507258 cell wall and cell processes |
| Rv1081c | 3  | 1  | 1,943507258 cell wall and cell processes |
| Rv1087A | 1  | 0  | 1,943507258 cell wall and cell processes |
| Rv1101c | 7  | 2  | 1,943507258 cell wall and cell processes |
| Rv1115  | 1  | 0  | 1,943507258 cell wall and cell processes |
| Rv1140  | 11 | 4  | 1,943507258 cell wall and cell processes |
| Rv1145  | 1  | 0  | 1,943507258 cell wall and cell processes |
| Rv1146  | 2  | 1  | 1,943507258 cell wall and cell processes |
| Rv1200  | 3  | 1  | 1,943507258 cell wall and cell processes |
| Rv1226c | 7  | 2  | 1,943507258 cell wall and cell processes |
| Rv1236  | 6  | 2  | 1,943507258 cell wall and cell processes |
| Rv1237  | 4  | 2  | 1,943507258 cell wall and cell processes |
| Rv1244  | 7  | 3  | 1,943507258 cell wall and cell processes |
| Rv1250  | 4  | 1  | 1,943507258 cell wall and cell processes |
| Rv1270c | 4  | 2  | 1,943507258 cell wall and cell processes |
| Rv1271c | 1  | 0  | 1,943507258 cell wall and cell processes |
| Rv1272c | 3  | 1  | 1,943507258 cell wall and cell processes |
| Rv1281c | 9  | 3  | 1,943507258 cell wall and cell processes |
| Rv1291c | 0  | 0  | 1,943507258 cell wall and cell processes |
| Rv1338  | 8  | 3  | 1,943507258 cell wall and cell processes |
| Rv1342c | 9  | 4  | 1,943507258 cell wall and cell processes |
| Rv1343c | 4  | 1  | 1,943507258 cell wall and cell processes |
| Rv1371  | 0  | 0  | 1,943507258 cell wall and cell processes |
| Rv1401  | 9  | 4  | 1,943507258 cell wall and cell processes |
| Rv1411c | 38 | 16 | 1,943507258 cell wall and cell processes |
| Rv1431  | 2  | 1  | 1,943507258 cell wall and cell processes |

|         |    |    |                                          |
|---------|----|----|------------------------------------------|
| Rv1457c | 7  | 2  | 1,943507258 cell wall and cell processes |
| Rv1459c | 5  | 2  | 1,943507258 cell wall and cell processes |
| Rv1469  | 3  | 1  | 1,943507258 cell wall and cell processes |
| Rv1481  | 16 | 7  | 1,943507258 cell wall and cell processes |
| Rv1490  | 1  | 0  | 1,943507258 cell wall and cell processes |
| Rv1510  | 3  | 1  | 1,943507258 cell wall and cell processes |
| Rv1517  | 2  | 1  | 1,943507258 cell wall and cell processes |
| Rv1522c | 4  | 1  | 1,943507258 cell wall and cell processes |
| Rv1541c | 2  | 0  | 1,943507258 cell wall and cell processes |
| Rv1607  | 7  | 3  | 1,943507258 cell wall and cell processes |
| Rv1635c | 5  | 2  | 1,943507258 cell wall and cell processes |
| Rv1667c | 3  | 1  | 1,943507258 cell wall and cell processes |
| Rv1671  | 3  | 1  | 1,943507258 cell wall and cell processes |
| Rv1686c | 3  | 1  | 1,943507258 cell wall and cell processes |
| Rv1704c | 8  | 3  | 1,943507258 cell wall and cell processes |
| Rv1707  | 9  | 3  | 1,943507258 cell wall and cell processes |
| Rv1708  | 7  | 2  | 1,943507258 cell wall and cell processes |
| Rv1710  | 9  | 4  | 1,943507258 cell wall and cell processes |
| Rv1730c | 2  | 0  | 1,943507258 cell wall and cell processes |
| Rv1735c | 0  | 0  | 1,943507258 cell wall and cell processes |
| Rv1744c | 1  | 0  | 1,943507258 cell wall and cell processes |
| Rv1758  | 0  | 0  | 1,943507258 cell wall and cell processes |
| Rv1761c | 3  | 1  | 1,943507258 cell wall and cell processes |
| Rv1779c | 19 | 7  | 1,943507258 cell wall and cell processes |
| Rv1798  | 23 | 10 | 1,943507258 cell wall and cell processes |
| Rv1811  | 11 | 4  | 1,943507258 cell wall and cell processes |
| Rv1819c | 2  | 0  | 1,943507258 cell wall and cell processes |
| Rv1841c | 11 | 4  | 1,943507258 cell wall and cell processes |
| Rv1845c | 28 | 11 | 1,943507258 cell wall and cell processes |
| Rv1858  | 2  | 1  | 1,943507258 cell wall and cell processes |
| Rv1877  | 6  | 2  | 1,943507258 cell wall and cell processes |
| Rv1902c | 3  | 1  | 1,943507258 cell wall and cell processes |
| Rv1903  | 3  | 1  | 1,943507258 cell wall and cell processes |
| Rv1921c | 0  | 0  | 1,943507258 cell wall and cell processes |

|         |    |    |                                          |
|---------|----|----|------------------------------------------|
| Rv1922  | 2  | 1  | 1,943507258 cell wall and cell processes |
| Rv1946c | 1  | 0  | 1,943507258 cell wall and cell processes |
| Rv1970  | 0  | 0  | 1,943507258 cell wall and cell processes |
| Rv1973  | 0  | 0  | 1,943507258 cell wall and cell processes |
| Rv1974  | 0  | 0  | 1,943507258 cell wall and cell processes |
| Rv1979c | 3  | 1  | 1,943507258 cell wall and cell processes |
| Rv1980c | 28 | 12 | 1,943507258 cell wall and cell processes |
| Rv1986  | 4  | 1  | 1,943507258 cell wall and cell processes |
| Rv1999c | 1  | 0  | 1,943507258 cell wall and cell processes |
| Rv2025c | 2  | 0  | 1,943507258 cell wall and cell processes |
| Rv2037c | 6  | 2  | 1,943507258 cell wall and cell processes |
| Rv2038c | 4  | 1  | 1,943507258 cell wall and cell processes |
| Rv2040c | 3  | 1  | 1,943507258 cell wall and cell processes |
| Rv2060  | 0  | 0  | 1,943507258 cell wall and cell processes |
| Rv2075c | 2  | 1  | 1,943507258 cell wall and cell processes |
| Rv2091c | 45 | 19 | 1,943507258 cell wall and cell processes |
| Rv2116  | 0  | 0  | 1,943507258 cell wall and cell processes |
| Rv2138  | 4  | 2  | 1,943507258 cell wall and cell processes |
| Rv2153c | 8  | 3  | 1,943507258 cell wall and cell processes |
| Rv2157c | 7  | 3  | 1,943507258 cell wall and cell processes |
| Rv2171  | 4  | 1  | 1,943507258 cell wall and cell processes |
| Rv2203  | 3  | 1  | 1,943507258 cell wall and cell processes |
| Rv2223c | 4  | 2  | 1,943507258 cell wall and cell processes |
| Rv2235  | 5  | 2  | 1,943507258 cell wall and cell processes |
| Rv2253  | 1  | 0  | 1,943507258 cell wall and cell processes |
| Rv2254c | 3  | 1  | 1,943507258 cell wall and cell processes |
| Rv2265  | 1  | 0  | 1,943507258 cell wall and cell processes |
| Rv2270  | 0  | 0  | 1,943507258 cell wall and cell processes |
| Rv2272  | 11 | 5  | 1,943507258 cell wall and cell processes |
| Rv2281  | 2  | 1  | 1,943507258 cell wall and cell processes |
| Rv2287  | 4  | 1  | 1,943507258 cell wall and cell processes |
| Rv2301  | 8  | 3  | 1,943507258 cell wall and cell processes |
| Rv2306A | 2  | 1  | 1,943507258 cell wall and cell processes |
| Rv2306B | 0  | 0  | 1,943507258 cell wall and cell processes |

|         |    |    |                                          |
|---------|----|----|------------------------------------------|
| Rv2316  | 2  | 0  | 1,943507258 cell wall and cell processes |
| Rv2320c | 2  | 1  | 1,943507258 cell wall and cell processes |
| Rv2361c | 5  | 2  | 1,943507258 cell wall and cell processes |
| Rv2395  | 6  | 2  | 1,943507258 cell wall and cell processes |
| Rv2437  | 1  | 0  | 1,943507258 cell wall and cell processes |
| Rv2443  | 6  | 2  | 1,943507258 cell wall and cell processes |
| Rv2450c | 3  | 1  | 1,943507258 cell wall and cell processes |
| Rv2508c | 5  | 2  | 1,943507258 cell wall and cell processes |
| Rv2543  | 1  | 0  | 1,943507258 cell wall and cell processes |
| Rv2544  | 0  | 0  | 1,943507258 cell wall and cell processes |
| Rv2563  | 5  | 2  | 1,943507258 cell wall and cell processes |
| Rv2597  | 5  | 2  | 1,943507258 cell wall and cell processes |
| Rv2673  | 7  | 3  | 1,943507258 cell wall and cell processes |
| Rv2684  | 4  | 1  | 1,943507258 cell wall and cell processes |
| Rv2686c | 2  | 0  | 1,943507258 cell wall and cell processes |
| Rv2688c | 4  | 2  | 1,943507258 cell wall and cell processes |
| Rv2690c | 7  | 2  | 1,943507258 cell wall and cell processes |
| Rv2700  | 2  | 1  | 1,943507258 cell wall and cell processes |
| Rv2709  | 19 | 7  | 1,943507258 cell wall and cell processes |
| Rv2723  | 1  | 0  | 1,943507258 cell wall and cell processes |
| Rv2729c | 23 | 10 | 1,943507258 cell wall and cell processes |
| Rv2767c | 1  | 0  | 1,943507258 cell wall and cell processes |
| Rv2796c | 11 | 4  | 1,943507258 cell wall and cell processes |
| Rv2806  | 1  | 0  | 1,943507258 cell wall and cell processes |
| Rv2833c | 0  | 0  | 1,943507258 cell wall and cell processes |
| Rv2835c | 1  | 0  | 1,943507258 cell wall and cell processes |
| Rv2843  | 4  | 1  | 1,943507258 cell wall and cell processes |
| Rv2869c | 20 | 8  | 1,943507258 cell wall and cell processes |
| Rv2873  | 4  | 1  | 1,943507258 cell wall and cell processes |
| Rv2877c | 4  | 2  | 1,943507258 cell wall and cell processes |
| Rv2911  | 1  | 0  | 1,943507258 cell wall and cell processes |
| Rv2916c | 19 | 7  | 1,943507258 cell wall and cell processes |
| Rv2972c | 0  | 0  | 1,943507258 cell wall and cell processes |
| Rv2981c | 7  | 3  | 1,943507258 cell wall and cell processes |



|         |    |    |                                          |
|---------|----|----|------------------------------------------|
| Rv2994  | 5  | 2  | 1,943507258 cell wall and cell processes |
| Rv3000  | 2  | 1  | 1,943507258 cell wall and cell processes |
| Rv3004  | 7  | 2  | 1,943507258 cell wall and cell processes |
| Rv3016  | 7  | 3  | 1,943507258 cell wall and cell processes |
| Rv3017c | 7  | 3  | 1,943507258 cell wall and cell processes |
| Rv3036c | 4  | 1  | 1,943507258 cell wall and cell processes |
| Rv3044  | 10 | 4  | 1,943507258 cell wall and cell processes |
| Rv3064c | 1  | 0  | 1,943507258 cell wall and cell processes |
| Rv3065  | 10 | 4  | 1,943507258 cell wall and cell processes |
| Rv3101c | 6  | 2  | 1,943507258 cell wall and cell processes |
| Rv3239c | 4  | 2  | 1,943507258 cell wall and cell processes |
| Rv3253c | 3  | 1  | 1,943507258 cell wall and cell processes |
| Rv3270  | 36 | 15 | 1,943507258 cell wall and cell processes |
| Rv3278c | 2  | 0  | 1,943507258 cell wall and cell processes |
| Rv3301c | 39 | 16 | 1,943507258 cell wall and cell processes |
| Rv3310  | 4  | 1  | 1,943507258 cell wall and cell processes |
| Rv3330  | 6  | 2  | 1,943507258 cell wall and cell processes |
| Rv3395A | 0  | 0  | 1,943507258 cell wall and cell processes |
| Rv3434c | 2  | 1  | 1,943507258 cell wall and cell processes |
| Rv3444c | 1  | 0  | 1,943507258 cell wall and cell processes |
| Rv3445c | 4  | 1  | 1,943507258 cell wall and cell processes |
| Rv3447c | 0  | 0  | 1,943507258 cell wall and cell processes |
| Rv3448  | 0  | 0  | 1,943507258 cell wall and cell processes |
| Rv3450c | 4  | 2  | 1,943507258 cell wall and cell processes |
| Rv3453  | 1  | 0  | 1,943507258 cell wall and cell processes |
| Rv3454  | 0  | 0  | 1,943507258 cell wall and cell processes |
| Rv3483c | 11 | 5  | 1,943507258 cell wall and cell processes |
| Rv3576  | 6  | 2  | 1,943507258 cell wall and cell processes |
| Rv3584  | 9  | 4  | 1,943507258 cell wall and cell processes |
| Rv3605c | 27 | 11 | 1,943507258 cell wall and cell processes |
| Rv3625c | 5  | 2  | 1,943507258 cell wall and cell processes |
| Rv3629c | 5  | 2  | 1,943507258 cell wall and cell processes |
| Rv3630  | 7  | 2  | 1,943507258 cell wall and cell processes |
| Rv3635  | 2  | 0  | 1,943507258 cell wall and cell processes |

|         |    |    |                                          |
|---------|----|----|------------------------------------------|
| Rv3658c | 4  | 1  | 1,943507258 cell wall and cell processes |
| Rv3663c | 2  | 1  | 1,943507258 cell wall and cell processes |
| Rv3665c | 2  | 0  | 1,943507258 cell wall and cell processes |
| Rv3666c | 2  | 1  | 1,943507258 cell wall and cell processes |
| Rv3669  | 11 | 4  | 1,943507258 cell wall and cell processes |
| Rv3682  | 23 | 9  | 1,943507258 cell wall and cell processes |
| Rv3693  | 5  | 2  | 1,943507258 cell wall and cell processes |
| Rv3724B | 3  | 1  | 1,943507258 cell wall and cell processes |
| Rv3728  | 2  | 1  | 1,943507258 cell wall and cell processes |
| Rv3737  | 6  | 2  | 1,943507258 cell wall and cell processes |
| Rv3781  | 7  | 3  | 1,943507258 cell wall and cell processes |
| Rv3783  | 8  | 3  | 1,943507258 cell wall and cell processes |
| Rv3789  | 3  | 1  | 1,943507258 cell wall and cell processes |
| Rv3792  | 5  | 2  | 1,943507258 cell wall and cell processes |
| Rv3793  | 5  | 2  | 1,943507258 cell wall and cell processes |
| Rv3794  | 14 | 6  | 1,943507258 cell wall and cell processes |
| Rv3809c | 2  | 1  | 1,943507258 cell wall and cell processes |
| Rv3821  | 12 | 5  | 1,943507258 cell wall and cell processes |
| Rv3848  | 4  | 2  | 1,943507258 cell wall and cell processes |
| Rv3871  | 32 | 13 | 1,943507258 cell wall and cell processes |
| Rv3888c | 4  | 2  | 1,943507258 cell wall and cell processes |
| Rv3889c | 4  | 2  | 1,943507258 cell wall and cell processes |
| Rv3895c | 7  | 3  | 1,943507258 cell wall and cell processes |
| Rv3910  | 14 | 5  | 1,943507258 cell wall and cell processes |
| Rv0031  | 1  | 0  | 1,943507258 insertion seqs and phages    |
| Rv0094c | 0  | 0  | 1,943507258 insertion seqs and phages    |
| Rv0393  | 1  | 0  | 1,943507258 insertion seqs and phages    |
| Rv0397  | 0  | 0  | 1,943507258 insertion seqs and phages    |
| Rv0796  | 1  | 0  | 1,943507258 insertion seqs and phages    |
| Rv0797  | 1  | 0  | 1,943507258 insertion seqs and phages    |
| Rv0920c | 2  | 1  | 1,943507258 insertion seqs and phages    |
| Rv1034c | 0  | 0  | 1,943507258 insertion seqs and phages    |
| Rv1035c | 0  | 0  | 1,943507258 insertion seqs and phages    |
| Rv1047  | 1  | 0  | 1,943507258 insertion seqs and phages    |

|         |   |   |                                       |
|---------|---|---|---------------------------------------|
| Rv1128c | 2 | 1 | 1,943507258 insertion seqs and phages |
| Rv1199c | 0 | 0 | 1,943507258 insertion seqs and phages |
| Rv1313c | 1 | 0 | 1,943507258 insertion seqs and phages |
| Rv1369c | 0 | 0 | 1,943507258 insertion seqs and phages |
| Rv1573  | 0 | 0 | 1,943507258 insertion seqs and phages |
| Rv1574  | 0 | 0 | 1,943507258 insertion seqs and phages |
| Rv1575  | 0 | 0 | 1,943507258 insertion seqs and phages |
| Rv1579c | 0 | 0 | 1,943507258 insertion seqs and phages |
| Rv1580c | 1 | 0 | 1,943507258 insertion seqs and phages |
| Rv1581c | 0 | 0 | 1,943507258 insertion seqs and phages |
| Rv1582c | 1 | 0 | 1,943507258 insertion seqs and phages |
| Rv1583c | 3 | 1 | 1,943507258 insertion seqs and phages |
| Rv1584c | 2 | 1 | 1,943507258 insertion seqs and phages |
| Rv1586c | 5 | 2 | 1,943507258 insertion seqs and phages |
| Rv1587c | 0 | 0 | 1,943507258 insertion seqs and phages |
| Rv1588c | 7 | 3 | 1,943507258 insertion seqs and phages |
| Rv1702c | 0 | 0 | 1,943507258 insertion seqs and phages |
| Rv1756c | 0 | 0 | 1,943507258 insertion seqs and phages |
| Rv1757c | 2 | 1 | 1,943507258 insertion seqs and phages |
| Rv1764  | 1 | 0 | 1,943507258 insertion seqs and phages |
| Rv1765A | 0 | 0 | 1,943507258 insertion seqs and phages |
| Rv2013  | 0 | 0 | 1,943507258 insertion seqs and phages |
| Rv2014  | 0 | 0 | 1,943507258 insertion seqs and phages |
| Rv2085  | 7 | 2 | 1,943507258 insertion seqs and phages |
| Rv2086  | 0 | 0 | 1,943507258 insertion seqs and phages |
| Rv2087  | 1 | 0 | 1,943507258 insertion seqs and phages |
| Rv2100  | 1 | 0 | 1,943507258 insertion seqs and phages |
| Rv2106  | 1 | 0 | 1,943507258 insertion seqs and phages |
| Rv2167c | 0 | 0 | 1,943507258 insertion seqs and phages |
| Rv2168c | 2 | 1 | 1,943507258 insertion seqs and phages |
| Rv2278  | 9 | 3 | 1,943507258 insertion seqs and phages |
| Rv2279  | 1 | 0 | 1,943507258 insertion seqs and phages |
| Rv2310  | 0 | 0 | 1,943507258 insertion seqs and phages |
| Rv2354  | 6 | 2 | 1,943507258 insertion seqs and phages |

|         |    |   |                                       |
|---------|----|---|---------------------------------------|
| Rv2355  | 0  | 0 | 1,943507258 insertion seqs and phages |
| Rv2479c | 0  | 0 | 1,943507258 insertion seqs and phages |
| Rv2512c | 0  | 0 | 1,943507258 insertion seqs and phages |
| Rv2647  | 2  | 0 | 1,943507258 insertion seqs and phages |
| Rv2649  | 0  | 0 | 1,943507258 insertion seqs and phages |
| Rv2652c | 1  | 0 | 1,943507258 insertion seqs and phages |
| Rv2653c | 0  | 0 | 1,943507258 insertion seqs and phages |
| Rv2654c | 0  | 0 | 1,943507258 insertion seqs and phages |
| Rv2655c | 2  | 0 | 1,943507258 insertion seqs and phages |
| Rv2656c | 1  | 0 | 1,943507258 insertion seqs and phages |
| Rv2666  | 1  | 0 | 1,943507258 insertion seqs and phages |
| Rv2810c | 3  | 1 | 1,943507258 insertion seqs and phages |
| Rv2812  | 0  | 0 | 1,943507258 insertion seqs and phages |
| Rv2814c | 0  | 0 | 1,943507258 insertion seqs and phages |
| Rv2815c | 4  | 1 | 1,943507258 insertion seqs and phages |
| Rv2894c | 10 | 4 | 1,943507258 insertion seqs and phages |
| Rv2943  | 3  | 1 | 1,943507258 insertion seqs and phages |
| Rv2961  | 0  | 0 | 1,943507258 insertion seqs and phages |
| Rv3023c | 0  | 0 | 1,943507258 insertion seqs and phages |
| Rv3115  | 1  | 0 | 1,943507258 insertion seqs and phages |
| Rv3185  | 1  | 0 | 1,943507258 insertion seqs and phages |
| Rv3187  | 1  | 0 | 1,943507258 insertion seqs and phages |
| Rv3191c | 0  | 0 | 1,943507258 insertion seqs and phages |
| Rv3326  | 1  | 0 | 1,943507258 insertion seqs and phages |
| Rv3327  | 1  | 0 | 1,943507258 insertion seqs and phages |
| Rv3348  | 3  | 1 | 1,943507258 insertion seqs and phages |
| Rv3349c | 1  | 0 | 1,943507258 insertion seqs and phages |
| Rv3380c | 0  | 0 | 1,943507258 insertion seqs and phages |
| Rv3387  | 1  | 0 | 1,943507258 insertion seqs and phages |
| Rv3427c | 0  | 0 | 1,943507258 insertion seqs and phages |
| Rv3428c | 1  | 0 | 1,943507258 insertion seqs and phages |
| Rv3466  | 4  | 2 | 1,943507258 insertion seqs and phages |
| Rv3467  | 0  | 0 | 1,943507258 insertion seqs and phages |
| Rv3475  | 1  | 0 | 1,943507258 insertion seqs and phages |

|         |   |   |                                       |
|---------|---|---|---------------------------------------|
| Rv3637  | 0 | 0 | 1,943507258 insertion seqs and phages |
| Rv3638  | 0 | 0 | 1,943507258 insertion seqs and phages |
| Rv3640c | 0 | 0 | 1,943507258 insertion seqs and phages |
| Rv3751  | 1 | 0 | 1,943507258 insertion seqs and phages |
| Rv3798  | 6 | 2 | 1,943507258 insertion seqs and phages |
| Rv0096  | 1 | 0 | 1,943507258 PE/PPE                    |
| Rv0109  | 3 | 1 | 1,943507258 PE/PPE                    |
| Rv0124  | 0 | 0 | 1,943507258 PE/PPE                    |
| Rv0151c | 1 | 0 | 1,943507258 PE/PPE                    |
| Rv0152c | 0 | 0 | 1,943507258 PE/PPE                    |
| Rv0159c | 1 | 0 | 1,943507258 PE/PPE                    |
| Rv0160c | 0 | 0 | 1,943507258 PE/PPE                    |
| Rv0256c | 4 | 1 | 1,943507258 PE/PPE                    |
| Rv0278c | 1 | 0 | 1,943507258 PE/PPE                    |
| Rv0279c | 2 | 0 | 1,943507258 PE/PPE                    |
| Rv0297  | 7 | 3 | 1,943507258 PE/PPE                    |
| Rv0304c | 0 | 0 | 1,943507258 PE/PPE                    |
| Rv0335c | 0 | 0 | 1,943507258 PE/PPE                    |
| Rv0354c | 0 | 0 | 1,943507258 PE/PPE                    |
| Rv0355c | 1 | 0 | 1,943507258 PE/PPE                    |
| Rv0388c | 0 | 0 | 1,943507258 PE/PPE                    |
| Rv0453  | 1 | 0 | 1,943507258 PE/PPE                    |
| Rv0532  | 7 | 3 | 1,943507258 PE/PPE                    |
| Rv0746  | 2 | 0 | 1,943507258 PE/PPE                    |
| Rv0747  | 4 | 2 | 1,943507258 PE/PPE                    |
| Rv0832  | 2 | 1 | 1,943507258 PE/PPE                    |
| Rv0833  | 4 | 1 | 1,943507258 PE/PPE                    |
| Rv0915c | 2 | 0 | 1,943507258 PE/PPE                    |
| Rv0916c | 1 | 0 | 1,943507258 PE/PPE                    |
| Rv0977  | 2 | 1 | 1,943507258 PE/PPE                    |
| Rv0978c | 0 | 0 | 1,943507258 PE/PPE                    |
| Rv0980c | 1 | 0 | 1,943507258 PE/PPE                    |
| Rv1039c | 1 | 0 | 1,943507258 PE/PPE                    |
| Rv1040c | 1 | 0 | 1,943507258 PE/PPE                    |

|         |    |    |                    |
|---------|----|----|--------------------|
| Rv1067c | 1  | 0  | 1,943507258 PE/PPE |
| Rv1068c | 1  | 0  | 1,943507258 PE/PPE |
| Rv1087  | 5  | 2  | 1,943507258 PE/PPE |
| Rv1088  | 1  | 0  | 1,943507258 PE/PPE |
| Rv1089  | 0  | 0  | 1,943507258 PE/PPE |
| Rv1091  | 6  | 2  | 1,943507258 PE/PPE |
| Rv1135c | 1  | 0  | 1,943507258 PE/PPE |
| Rv1172c | 11 | 5  | 1,943507258 PE/PPE |
| Rv1243c | 2  | 0  | 1,943507258 PE/PPE |
| Rv1325c | 2  | 1  | 1,943507258 PE/PPE |
| Rv1396c | 7  | 3  | 1,943507258 PE/PPE |
| Rv1430  | 1  | 0  | 1,943507258 PE/PPE |
| Rv1450c | 2  | 0  | 1,943507258 PE/PPE |
| Rv1452c | 1  | 0  | 1,943507258 PE/PPE |
| Rv1468c | 7  | 3  | 1,943507258 PE/PPE |
| Rv1548c | 1  | 0  | 1,943507258 PE/PPE |
| Rv1646  | 31 | 13 | 1,943507258 PE/PPE |
| Rv1651c | 7  | 2  | 1,943507258 PE/PPE |
| Rv1705c | 1  | 0  | 1,943507258 PE/PPE |
| Rv1706c | 3  | 1  | 1,943507258 PE/PPE |
| Rv1753c | 1  | 0  | 1,943507258 PE/PPE |
| Rv1759c | 1  | 0  | 1,943507258 PE/PPE |
| Rv1768  | 9  | 3  | 1,943507258 PE/PPE |
| Rv1787  | 4  | 1  | 1,943507258 PE/PPE |
| Rv1788  | 2  | 1  | 1,943507258 PE/PPE |
| Rv1790  | 4  | 2  | 1,943507258 PE/PPE |
| Rv1800  | 5  | 2  | 1,943507258 PE/PPE |
| Rv1802  | 2  | 0  | 1,943507258 PE/PPE |
| Rv1803c | 5  | 2  | 1,943507258 PE/PPE |
| Rv1809  | 4  | 1  | 1,943507258 PE/PPE |
| Rv1917c | 0  | 0  | 1,943507258 PE/PPE |
| Rv1918c | 2  | 1  | 1,943507258 PE/PPE |
| Rv1983  | 3  | 1  | 1,943507258 PE/PPE |
| Rv2123  | 0  | 0  | 1,943507258 PE/PPE |

|         |    |   |                    |
|---------|----|---|--------------------|
| Rv2126c | 1  | 0 | 1,943507258 PE/PPE |
| Rv2328  | 2  | 1 | 1,943507258 PE/PPE |
| Rv2353c | 0  | 0 | 1,943507258 PE/PPE |
| Rv2408  | 1  | 0 | 1,943507258 PE/PPE |
| Rv2487c | 3  | 1 | 1,943507258 PE/PPE |
| Rv2490c | 2  | 0 | 1,943507258 PE/PPE |
| Rv2608  | 3  | 1 | 1,943507258 PE/PPE |
| Rv2615c | 7  | 2 | 1,943507258 PE/PPE |
| Rv2741  | 13 | 5 | 1,943507258 PE/PPE |
| Rv2768c | 2  | 1 | 1,943507258 PE/PPE |
| Rv2770c | 4  | 2 | 1,943507258 PE/PPE |
| Rv2853  | 3  | 1 | 1,943507258 PE/PPE |
| Rv2892c | 4  | 1 | 1,943507258 PE/PPE |
| Rv3021c | 2  | 0 | 1,943507258 PE/PPE |
| Rv3022A | 2  | 1 | 1,943507258 PE/PPE |
| Rv3022c | 2  | 1 | 1,943507258 PE/PPE |
| Rv3097c | 3  | 1 | 1,943507258 PE/PPE |
| Rv3125c | 2  | 0 | 1,943507258 PE/PPE |
| Rv3159c | 4  | 2 | 1,943507258 PE/PPE |
| Rv3343c | 3  | 1 | 1,943507258 PE/PPE |
| Rv3344c | 1  | 0 | 1,943507258 PE/PPE |
| Rv3345c | 1  | 0 | 1,943507258 PE/PPE |
| Rv3350c | 2  | 0 | 1,943507258 PE/PPE |
| Rv3367  | 4  | 2 | 1,943507258 PE/PPE |
| Rv3388  | 1  | 0 | 1,943507258 PE/PPE |
| Rv3426  | 2  | 1 | 1,943507258 PE/PPE |
| Rv3511  | 1  | 0 | 1,943507258 PE/PPE |
| Rv3512  | 2  | 0 | 1,943507258 PE/PPE |
| Rv3514  | 5  | 2 | 1,943507258 PE/PPE |
| Rv3532  | 1  | 0 | 1,943507258 PE/PPE |
| Rv3533c | 2  | 0 | 1,943507258 PE/PPE |
| Rv3558  | 1  | 0 | 1,943507258 PE/PPE |
| Rv3590c | 4  | 1 | 1,943507258 PE/PPE |
| Rv3595c | 4  | 2 | 1,943507258 PE/PPE |

|         |    |   |                                                     |
|---------|----|---|-----------------------------------------------------|
| Rv3621c | 1  | 0 | 1,943507258 PE/PPE                                  |
| Rv3622c | 0  | 0 | 1,943507258 PE/PPE                                  |
| Rv3652  | 2  | 1 | 1,943507258 PE/PPE                                  |
| Rv3738c | 2  | 1 | 1,943507258 PE/PPE                                  |
| Rv3746c | 5  | 2 | 1,943507258 PE/PPE                                  |
| Rv3812  | 3  | 1 | 1,943507258 PE/PPE                                  |
| Rv0013  | 2  | 1 | 1,943507258 intermediary metabolism and respiration |
| Rv0032  | 2  | 1 | 1,943507258 intermediary metabolism and respiration |
| Rv0062  | 8  | 3 | 1,943507258 intermediary metabolism and respiration |
| Rv0063  | 3  | 1 | 1,943507258 intermediary metabolism and respiration |
| Rv0068  | 1  | 0 | 1,943507258 intermediary metabolism and respiration |
| Rv0069c | 4  | 2 | 1,943507258 intermediary metabolism and respiration |
| Rv0075  | 9  | 3 | 1,943507258 intermediary metabolism and respiration |
| Rv0077c | 2  | 0 | 1,943507258 intermediary metabolism and respiration |
| Rv0084  | 8  | 3 | 1,943507258 intermediary metabolism and respiration |
| Rv0086  | 7  | 3 | 1,943507258 intermediary metabolism and respiration |
| Rv0087  | 2  | 1 | 1,943507258 intermediary metabolism and respiration |
| Rv0089  | 2  | 1 | 1,943507258 intermediary metabolism and respiration |
| Rv0097  | 2  | 1 | 1,943507258 intermediary metabolism and respiration |
| Rv0125  | 14 | 5 | 1,943507258 intermediary metabolism and respiration |
| Rv0133  | 11 | 4 | 1,943507258 intermediary metabolism and respiration |
| Rv0161  | 2  | 1 | 1,943507258 intermediary metabolism and respiration |
| Rv0162c | 7  | 3 | 1,943507258 intermediary metabolism and respiration |
| Rv0187  | 10 | 4 | 1,943507258 intermediary metabolism and respiration |
| Rv0213c | 2  | 0 | 1,943507258 intermediary metabolism and respiration |
| Rv0217c | 2  | 1 | 1,943507258 intermediary metabolism and respiration |
| Rv0224c | 2  | 1 | 1,943507258 intermediary metabolism and respiration |
| Rv0228  | 4  | 1 | 1,943507258 intermediary metabolism and respiration |
| Rv0234c | 7  | 2 | 1,943507258 intermediary metabolism and respiration |
| Rv0266c | 3  | 1 | 1,943507258 intermediary metabolism and respiration |
| Rv0294  | 1  | 0 | 1,943507258 intermediary metabolism and respiration |
| Rv0296c | 2  | 0 | 1,943507258 intermediary metabolism and respiration |
| Rv0306  | 1  | 0 | 1,943507258 intermediary metabolism and respiration |
| Rv0316  | 3  | 1 | 1,943507258 intermediary metabolism and respiration |



|         |    |    |             |                                         |
|---------|----|----|-------------|-----------------------------------------|
| Rv0319  | 4  | 2  | 1,943507258 | intermediary metabolism and respiration |
| Rv0321  | 2  | 1  | 1,943507258 | intermediary metabolism and respiration |
| Rv0322  | 1  | 0  | 1,943507258 | intermediary metabolism and respiration |
| Rv0327c | 0  | 0  | 1,943507258 | intermediary metabolism and respiration |
| Rv0331  | 3  | 1  | 1,943507258 | intermediary metabolism and respiration |
| Rv0369c | 3  | 1  | 1,943507258 | intermediary metabolism and respiration |
| Rv0370c | 1  | 0  | 1,943507258 | intermediary metabolism and respiration |
| Rv0374c | 1  | 0  | 1,943507258 | intermediary metabolism and respiration |
| Rv0375c | 1  | 0  | 1,943507258 | intermediary metabolism and respiration |
| Rv0380c | 4  | 1  | 1,943507258 | intermediary metabolism and respiration |
| Rv0408  | 4  | 2  | 1,943507258 | intermediary metabolism and respiration |
| Rv0414c | 1  | 0  | 1,943507258 | intermediary metabolism and respiration |
| Rv0415  | 11 | 4  | 1,943507258 | intermediary metabolism and respiration |
| Rv0416  | 8  | 3  | 1,943507258 | intermediary metabolism and respiration |
| Rv0417  | 2  | 1  | 1,943507258 | intermediary metabolism and respiration |
| Rv0423c | 26 | 10 | 1,943507258 | intermediary metabolism and respiration |
| Rv0428c | 2  | 1  | 1,943507258 | intermediary metabolism and respiration |
| Rv0438c | 3  | 1  | 1,943507258 | intermediary metabolism and respiration |
| Rv0439c | 4  | 1  | 1,943507258 | intermediary metabolism and respiration |
| Rv0457c | 2  | 1  | 1,943507258 | intermediary metabolism and respiration |
| Rv0484c | 7  | 3  | 1,943507258 | intermediary metabolism and respiration |
| Rv0517  | 8  | 3  | 1,943507258 | intermediary metabolism and respiration |
| Rv0520  | 2  | 0  | 1,943507258 | intermediary metabolism and respiration |
| Rv0521  | 0  | 0  | 1,943507258 | intermediary metabolism and respiration |
| Rv0524  | 11 | 4  | 1,943507258 | intermediary metabolism and respiration |
| Rv0529  | 11 | 4  | 1,943507258 | intermediary metabolism and respiration |
| Rv0534c | 3  | 1  | 1,943507258 | intermediary metabolism and respiration |
| Rv0539  | 7  | 2  | 1,943507258 | intermediary metabolism and respiration |
| Rv0548c | 9  | 4  | 1,943507258 | intermediary metabolism and respiration |
| Rv0553  | 2  | 1  | 1,943507258 | intermediary metabolism and respiration |
| Rv0560c | 4  | 2  | 1,943507258 | intermediary metabolism and respiration |
| Rv0561c | 4  | 2  | 1,943507258 | intermediary metabolism and respiration |
| Rv0565c | 2  | 0  | 1,943507258 | intermediary metabolism and respiration |
| Rv0567  | 9  | 4  | 1,943507258 | intermediary metabolism and respiration |

|         |    |   |                                                     |
|---------|----|---|-----------------------------------------------------|
| Rv0568  | 15 | 6 | 1,943507258 intermediary metabolism and respiration |
| Rv0573c | 0  | 0 | 1,943507258 intermediary metabolism and respiration |
| Rv0618  | 2  | 1 | 1,943507258 intermediary metabolism and respiration |
| Rv0619  | 0  | 0 | 1,943507258 intermediary metabolism and respiration |
| Rv0620  | 0  | 0 | 1,943507258 intermediary metabolism and respiration |
| Rv0648  | 0  | 0 | 1,943507258 intermediary metabolism and respiration |
| Rv0650  | 0  | 0 | 1,943507258 intermediary metabolism and respiration |
| Rv0654  | 7  | 2 | 1,943507258 intermediary metabolism and respiration |
| Rv0663  | 6  | 2 | 1,943507258 intermediary metabolism and respiration |
| Rv0669c | 4  | 1 | 1,943507258 intermediary metabolism and respiration |
| Rv0727c | 1  | 0 | 1,943507258 intermediary metabolism and respiration |
| Rv0728c | 0  | 0 | 1,943507258 intermediary metabolism and respiration |
| Rv0729  | 2  | 1 | 1,943507258 intermediary metabolism and respiration |
| Rv0751c | 4  | 2 | 1,943507258 intermediary metabolism and respiration |
| Rv0763c | 1  | 0 | 1,943507258 intermediary metabolism and respiration |
| Rv0766c | 1  | 0 | 1,943507258 intermediary metabolism and respiration |
| Rv0771  | 0  | 0 | 1,943507258 intermediary metabolism and respiration |
| Rv0778  | 8  | 3 | 1,943507258 intermediary metabolism and respiration |
| Rv0780  | 5  | 2 | 1,943507258 intermediary metabolism and respiration |
| Rv0793  | 1  | 0 | 1,943507258 intermediary metabolism and respiration |
| Rv0800  | 5  | 2 | 1,943507258 intermediary metabolism and respiration |
| Rv0828c | 0  | 0 | 1,943507258 intermediary metabolism and respiration |
| Rv0840c | 4  | 1 | 1,943507258 intermediary metabolism and respiration |
| Rv0846c | 2  | 1 | 1,943507258 intermediary metabolism and respiration |
| Rv0848  | 5  | 2 | 1,943507258 intermediary metabolism and respiration |
| Rv0851c | 3  | 1 | 1,943507258 intermediary metabolism and respiration |
| Rv0853c | 4  | 2 | 1,943507258 intermediary metabolism and respiration |
| Rv0858c | 2  | 1 | 1,943507258 intermediary metabolism and respiration |
| Rv0881  | 4  | 1 | 1,943507258 intermediary metabolism and respiration |
| Rv0884c | 9  | 4 | 1,943507258 intermediary metabolism and respiration |
| Rv0897c | 4  | 1 | 1,943507258 intermediary metabolism and respiration |
| Rv0919  | 1  | 0 | 1,943507258 intermediary metabolism and respiration |
| Rv0927c | 2  | 0 | 1,943507258 intermediary metabolism and respiration |
| Rv0943c | 0  | 0 | 1,943507258 intermediary metabolism and respiration |

|         |    |    |             |                                         |
|---------|----|----|-------------|-----------------------------------------|
| Rv0945  | 3  | 1  | 1,943507258 | intermediary metabolism and respiration |
| Rv0953c | 2  | 1  | 1,943507258 | intermediary metabolism and respiration |
| Rv0957  | 7  | 3  | 1,943507258 | intermediary metabolism and respiration |
| Rv0983  | 30 | 12 | 1,943507258 | intermediary metabolism and respiration |
| Rv1023  | 11 | 5  | 1,943507258 | intermediary metabolism and respiration |
| Rv1050  | 2  | 0  | 1,943507258 | intermediary metabolism and respiration |
| Rv1089A | 1  | 0  | 1,943507258 | intermediary metabolism and respiration |
| Rv1090  | 3  | 1  | 1,943507258 | intermediary metabolism and respiration |
| Rv1093  | 13 | 5  | 1,943507258 | intermediary metabolism and respiration |
| Rv1104  | 4  | 2  | 1,943507258 | intermediary metabolism and respiration |
| Rv1105  | 0  | 0  | 1,943507258 | intermediary metabolism and respiration |
| Rv1138c | 2  | 1  | 1,943507258 | intermediary metabolism and respiration |
| Rv1144  | 3  | 1  | 1,943507258 | intermediary metabolism and respiration |
| Rv1188  | 3  | 1  | 1,943507258 | intermediary metabolism and respiration |
| Rv1208  | 10 | 4  | 1,943507258 | intermediary metabolism and respiration |
| Rv1212c | 3  | 1  | 1,943507258 | intermediary metabolism and respiration |
| Rv1213  | 5  | 2  | 1,943507258 | intermediary metabolism and respiration |
| Rv1220c | 14 | 5  | 1,943507258 | intermediary metabolism and respiration |
| Rv1256c | 1  | 0  | 1,943507258 | intermediary metabolism and respiration |
| Rv1260  | 11 | 5  | 1,943507258 | intermediary metabolism and respiration |
| Rv1284  | 8  | 3  | 1,943507258 | intermediary metabolism and respiration |
| Rv1285  | 6  | 2  | 1,943507258 | intermediary metabolism and respiration |
| Rv1318c | 2  | 1  | 1,943507258 | intermediary metabolism and respiration |
| Rv1319c | 2  | 0  | 1,943507258 | intermediary metabolism and respiration |
| Rv1320c | 3  | 1  | 1,943507258 | intermediary metabolism and respiration |
| Rv1328  | 11 | 4  | 1,943507258 | intermediary metabolism and respiration |
| Rv1330c | 3  | 1  | 1,943507258 | intermediary metabolism and respiration |
| Rv1336  | 8  | 3  | 1,943507258 | intermediary metabolism and respiration |
| Rv1373  | 1  | 0  | 1,943507258 | intermediary metabolism and respiration |
| Rv1383  | 4  | 2  | 1,943507258 | intermediary metabolism and respiration |
| Rv1384  | 5  | 2  | 1,943507258 | intermediary metabolism and respiration |
| Rv1385  | 2  | 1  | 1,943507258 | intermediary metabolism and respiration |
| Rv1399c | 2  | 1  | 1,943507258 | intermediary metabolism and respiration |
| Rv1400c | 5  | 2  | 1,943507258 | intermediary metabolism and respiration |

|         |    |    |             |                                         |
|---------|----|----|-------------|-----------------------------------------|
| Rv1403c | 1  | 0  | 1,943507258 | intermediary metabolism and respiration |
| Rv1426c | 4  | 2  | 1,943507258 | intermediary metabolism and respiration |
| Rv1438  | 41 | 17 | 1,943507258 | intermediary metabolism and respiration |
| Rv1447c | 13 | 5  | 1,943507258 | intermediary metabolism and respiration |
| Rv1449c | 22 | 9  | 1,943507258 | intermediary metabolism and respiration |
| Rv1454c | 7  | 2  | 1,943507258 | intermediary metabolism and respiration |
| Rv1470  | 4  | 1  | 1,943507258 | intermediary metabolism and respiration |
| Rv1497  | 30 | 12 | 1,943507258 | intermediary metabolism and respiration |
| Rv1498c | 4  | 2  | 1,943507258 | intermediary metabolism and respiration |
| Rv1512  | 10 | 4  | 1,943507258 | intermediary metabolism and respiration |
| Rv1516c | 2  | 1  | 1,943507258 | intermediary metabolism and respiration |
| Rv1526c | 1  | 0  | 1,943507258 | intermediary metabolism and respiration |
| Rv1542c | 0  | 0  | 1,943507258 | intermediary metabolism and respiration |
| Rv1553  | 0  | 0  | 1,943507258 | intermediary metabolism and respiration |
| Rv1554  | 0  | 0  | 1,943507258 | intermediary metabolism and respiration |
| Rv1568  | 4  | 1  | 1,943507258 | intermediary metabolism and respiration |
| Rv1570  | 8  | 3  | 1,943507258 | intermediary metabolism and respiration |
| Rv1600  | 10 | 4  | 1,943507258 | intermediary metabolism and respiration |
| Rv1609  | 11 | 5  | 1,943507258 | intermediary metabolism and respiration |
| Rv1623c | 10 | 4  | 1,943507258 | intermediary metabolism and respiration |
| Rv1647  | 4  | 1  | 1,943507258 | intermediary metabolism and respiration |
| Rv1655  | 2  | 1  | 1,943507258 | intermediary metabolism and respiration |
| Rv1656  | 2  | 1  | 1,943507258 | intermediary metabolism and respiration |
| Rv1658  | 14 | 5  | 1,943507258 | intermediary metabolism and respiration |
| Rv1659  | 5  | 2  | 1,943507258 | intermediary metabolism and respiration |
| Rv1681  | 3  | 1  | 1,943507258 | intermediary metabolism and respiration |
| Rv1692  | 6  | 2  | 1,943507258 | intermediary metabolism and respiration |
| Rv1703c | 31 | 12 | 1,943507258 | intermediary metabolism and respiration |
| Rv1712  | 17 | 7  | 1,943507258 | intermediary metabolism and respiration |
| Rv1714  | 7  | 3  | 1,943507258 | intermediary metabolism and respiration |
| Rv1726  | 0  | 0  | 1,943507258 | intermediary metabolism and respiration |
| Rv1745c | 1  | 0  | 1,943507258 | intermediary metabolism and respiration |
| Rv1755c | 0  | 0  | 1,943507258 | intermediary metabolism and respiration |
| Rv1774  | 4  | 2  | 1,943507258 | intermediary metabolism and respiration |

|         |    |    |             |                                         |
|---------|----|----|-------------|-----------------------------------------|
| Rv1777  | 0  | 0  | 1,943507258 | intermediary metabolism and respiration |
| Rv1781c | 1  | 0  | 1,943507258 | intermediary metabolism and respiration |
| Rv1812c | 5  | 2  | 1,943507258 | intermediary metabolism and respiration |
| Rv1833c | 2  | 1  | 1,943507258 | intermediary metabolism and respiration |
| Rv1849  | 2  | 1  | 1,943507258 | intermediary metabolism and respiration |
| Rv1851  | 0  | 0  | 1,943507258 | intermediary metabolism and respiration |
| Rv1865c | 3  | 1  | 1,943507258 | intermediary metabolism and respiration |
| Rv1869c | 21 | 9  | 1,943507258 | intermediary metabolism and respiration |
| Rv1878  | 2  | 1  | 1,943507258 | intermediary metabolism and respiration |
| Rv1885c | 7  | 2  | 1,943507258 | intermediary metabolism and respiration |
| Rv1895  | 4  | 1  | 1,943507258 | intermediary metabolism and respiration |
| Rv1916  | 11 | 4  | 1,943507258 | intermediary metabolism and respiration |
| Rv1928c | 3  | 1  | 1,943507258 | intermediary metabolism and respiration |
| Rv1940  | 2  | 1  | 1,943507258 | intermediary metabolism and respiration |
| Rv1941  | 3  | 1  | 1,943507258 | intermediary metabolism and respiration |
| Rv2062c | 6  | 2  | 1,943507258 | intermediary metabolism and respiration |
| Rv2064  | 2  | 1  | 1,943507258 | intermediary metabolism and respiration |
| Rv2072c | 3  | 1  | 1,943507258 | intermediary metabolism and respiration |
| Rv2074  | 38 | 16 | 1,943507258 | intermediary metabolism and respiration |
| Rv2121c | 4  | 1  | 1,943507258 | intermediary metabolism and respiration |
| Rv2122c | 2  | 0  | 1,943507258 | intermediary metabolism and respiration |
| Rv2129c | 3  | 1  | 1,943507258 | intermediary metabolism and respiration |
| Rv2141c | 3  | 1  | 1,943507258 | intermediary metabolism and respiration |
| Rv2201  | 3  | 1  | 1,943507258 | intermediary metabolism and respiration |
| Rv2213  | 8  | 3  | 1,943507258 | intermediary metabolism and respiration |
| Rv2222c | 42 | 17 | 1,943507258 | intermediary metabolism and respiration |
| Rv2225  | 6  | 2  | 1,943507258 | intermediary metabolism and respiration |
| Rv2236c | 2  | 1  | 1,943507258 | intermediary metabolism and respiration |
| Rv2249c | 0  | 0  | 1,943507258 | intermediary metabolism and respiration |
| Rv2250A | 2  | 1  | 1,943507258 | intermediary metabolism and respiration |
| Rv2251  | 3  | 1  | 1,943507258 | intermediary metabolism and respiration |
| Rv2268c | 1  | 0  | 1,943507258 | intermediary metabolism and respiration |
| Rv2276  | 3  | 1  | 1,943507258 | intermediary metabolism and respiration |
| Rv2277c | 0  | 0  | 1,943507258 | intermediary metabolism and respiration |

|         |    |    |             |                                         |
|---------|----|----|-------------|-----------------------------------------|
| Rv2294  | 2  | 1  | 1,943507258 | intermediary metabolism and respiration |
| Rv2296  | 7  | 3  | 1,943507258 | intermediary metabolism and respiration |
| Rv2322c | 1  | 0  | 1,943507258 | intermediary metabolism and respiration |
| Rv2332  | 4  | 1  | 1,943507258 | intermediary metabolism and respiration |
| Rv2334  | 12 | 5  | 1,943507258 | intermediary metabolism and respiration |
| Rv2344c | 13 | 5  | 1,943507258 | intermediary metabolism and respiration |
| Rv2351c | 1  | 0  | 1,943507258 | intermediary metabolism and respiration |
| Rv2363  | 2  | 1  | 1,943507258 | intermediary metabolism and respiration |
| Rv2364c | 7  | 2  | 1,943507258 | intermediary metabolism and respiration |
| Rv2427c | 19 | 8  | 1,943507258 | intermediary metabolism and respiration |
| Rv2436  | 2  | 1  | 1,943507258 | intermediary metabolism and respiration |
| Rv2445c | 7  | 2  | 1,943507258 | intermediary metabolism and respiration |
| Rv2458  | 2  | 1  | 1,943507258 | intermediary metabolism and respiration |
| Rv2467  | 7  | 2  | 1,943507258 | intermediary metabolism and respiration |
| Rv2476c | 19 | 8  | 1,943507258 | intermediary metabolism and respiration |
| Rv2485c | 4  | 2  | 1,943507258 | intermediary metabolism and respiration |
| Rv2498c | 10 | 4  | 1,943507258 | intermediary metabolism and respiration |
| Rv2539c | 9  | 3  | 1,943507258 | intermediary metabolism and respiration |
| Rv2540c | 20 | 8  | 1,943507258 | intermediary metabolism and respiration |
| Rv2552c | 16 | 6  | 1,943507258 | intermediary metabolism and respiration |
| Rv2579  | 9  | 3  | 1,943507258 | intermediary metabolism and respiration |
| Rv2589  | 9  | 4  | 1,943507258 | intermediary metabolism and respiration |
| Rv2601  | 1  | 0  | 1,943507258 | intermediary metabolism and respiration |
| Rv2622  | 0  | 0  | 1,943507258 | intermediary metabolism and respiration |
| Rv2667  | 2  | 0  | 1,943507258 | intermediary metabolism and respiration |
| Rv2671  | 5  | 2  | 1,943507258 | intermediary metabolism and respiration |
| Rv2674  | 25 | 10 | 1,943507258 | intermediary metabolism and respiration |
| Rv2677c | 7  | 3  | 1,943507258 | intermediary metabolism and respiration |
| Rv2701c | 5  | 2  | 1,943507258 | intermediary metabolism and respiration |
| Rv2727c | 2  | 1  | 1,943507258 | intermediary metabolism and respiration |
| Rv2739c | 6  | 2  | 1,943507258 | intermediary metabolism and respiration |
| Rv2754c | 1  | 0  | 1,943507258 | intermediary metabolism and respiration |
| Rv2766c | 2  | 1  | 1,943507258 | intermediary metabolism and respiration |
| Rv2775  | 4  | 2  | 1,943507258 | intermediary metabolism and respiration |

|         |    |    |             |                                         |
|---------|----|----|-------------|-----------------------------------------|
| Rv2776c | 3  | 1  | 1,943507258 | intermediary metabolism and respiration |
| Rv2786c | 7  | 3  | 1,943507258 | intermediary metabolism and respiration |
| Rv2851c | 26 | 10 | 1,943507258 | intermediary metabolism and respiration |
| Rv2858c | 9  | 4  | 1,943507258 | intermediary metabolism and respiration |
| Rv2859c | 10 | 4  | 1,943507258 | intermediary metabolism and respiration |
| Rv2861c | 9  | 4  | 1,943507258 | intermediary metabolism and respiration |
| Rv2870c | 6  | 2  | 1,943507258 | intermediary metabolism and respiration |
| Rv2874  | 1  | 0  | 1,943507258 | intermediary metabolism and respiration |
| Rv2893  | 0  | 0  | 1,943507258 | intermediary metabolism and respiration |
| Rv2895c | 13 | 5  | 1,943507258 | intermediary metabolism and respiration |
| Rv2900c | 13 | 5  | 1,943507258 | intermediary metabolism and respiration |
| Rv2913c | 6  | 2  | 1,943507258 | intermediary metabolism and respiration |
| Rv2958c | 3  | 1  | 1,943507258 | intermediary metabolism and respiration |
| Rv2962c | 6  | 2  | 1,943507258 | intermediary metabolism and respiration |
| Rv2964  | 1  | 0  | 1,943507258 | intermediary metabolism and respiration |
| Rv2970c | 14 | 6  | 1,943507258 | intermediary metabolism and respiration |
| Rv2971  | 7  | 3  | 1,943507258 | intermediary metabolism and respiration |
| Rv2984  | 8  | 3  | 1,943507258 | intermediary metabolism and respiration |
| Rv2993c | 4  | 2  | 1,943507258 | intermediary metabolism and respiration |
| Rv2997  | 1  | 0  | 1,943507258 | intermediary metabolism and respiration |
| Rv3027c | 4  | 1  | 1,943507258 | intermediary metabolism and respiration |
| Rv3032  | 4  | 2  | 1,943507258 | intermediary metabolism and respiration |
| Rv3083  | 2  | 1  | 1,943507258 | intermediary metabolism and respiration |
| Rv3084  | 0  | 0  | 1,943507258 | intermediary metabolism and respiration |
| Rv3085  | 1  | 0  | 1,943507258 | intermediary metabolism and respiration |
| Rv3086  | 7  | 2  | 1,943507258 | intermediary metabolism and respiration |
| Rv3106  | 4  | 2  | 1,943507258 | intermediary metabolism and respiration |
| Rv3109  | 0  | 0  | 1,943507258 | intermediary metabolism and respiration |
| Rv3111  | 1  | 0  | 1,943507258 | intermediary metabolism and respiration |
| Rv3112  | 0  | 0  | 1,943507258 | intermediary metabolism and respiration |
| Rv3113  | 0  | 0  | 1,943507258 | intermediary metabolism and respiration |
| Rv3116  | 13 | 5  | 1,943507258 | intermediary metabolism and respiration |
| Rv3138  | 3  | 1  | 1,943507258 | intermediary metabolism and respiration |
| Rv3152  | 18 | 7  | 1,943507258 | intermediary metabolism and respiration |

|         |    |    |             |                                         |
|---------|----|----|-------------|-----------------------------------------|
| Rv3154  | 25 | 10 | 1,943507258 | intermediary metabolism and respiration |
| Rv3170  | 2  | 1  | 1,943507258 | intermediary metabolism and respiration |
| Rv3174  | 2  | 1  | 1,943507258 | intermediary metabolism and respiration |
| Rv3175  | 0  | 0  | 1,943507258 | intermediary metabolism and respiration |
| Rv3214  | 10 | 4  | 1,943507258 | intermediary metabolism and respiration |
| Rv3215  | 2  | 1  | 1,943507258 | intermediary metabolism and respiration |
| Rv3225c | 6  | 2  | 1,943507258 | intermediary metabolism and respiration |
| Rv3266c | 10 | 4  | 1,943507258 | intermediary metabolism and respiration |
| Rv3279c | 6  | 2  | 1,943507258 | intermediary metabolism and respiration |
| Rv3306c | 13 | 5  | 1,943507258 | intermediary metabolism and respiration |
| Rv3309c | 2  | 1  | 1,943507258 | intermediary metabolism and respiration |
| Rv3318  | 3  | 1  | 1,943507258 | intermediary metabolism and respiration |
| Rv3322c | 2  | 1  | 1,943507258 | intermediary metabolism and respiration |
| Rv3323c | 9  | 4  | 1,943507258 | intermediary metabolism and respiration |
| Rv3324c | 2  | 0  | 1,943507258 | intermediary metabolism and respiration |
| Rv3329  | 3  | 1  | 1,943507258 | intermediary metabolism and respiration |
| Rv3340  | 2  | 0  | 1,943507258 | intermediary metabolism and respiration |
| Rv3342  | 7  | 3  | 1,943507258 | intermediary metabolism and respiration |
| Rv3352c | 0  | 0  | 1,943507258 | intermediary metabolism and respiration |
| Rv3356c | 11 | 4  | 1,943507258 | intermediary metabolism and respiration |
| Rv3368c | 4  | 1  | 1,943507258 | intermediary metabolism and respiration |
| Rv3377c | 7  | 2  | 1,943507258 | intermediary metabolism and respiration |
| Rv3378c | 2  | 1  | 1,943507258 | intermediary metabolism and respiration |
| Rv3379c | 1  | 0  | 1,943507258 | intermediary metabolism and respiration |
| Rv3393  | 2  | 1  | 1,943507258 | intermediary metabolism and respiration |
| Rv3397c | 1  | 0  | 1,943507258 | intermediary metabolism and respiration |
| Rv3401  | 9  | 3  | 1,943507258 | intermediary metabolism and respiration |
| Rv3406  | 1  | 0  | 1,943507258 | intermediary metabolism and respiration |
| Rv3423c | 7  | 2  | 1,943507258 | intermediary metabolism and respiration |
| Rv3449  | 0  | 0  | 1,943507258 | intermediary metabolism and respiration |
| Rv3465  | 9  | 3  | 1,943507258 | intermediary metabolism and respiration |
| Rv3468c | 0  | 0  | 1,943507258 | intermediary metabolism and respiration |
| Rv3470c | 1  | 0  | 1,943507258 | intermediary metabolism and respiration |
| Rv3509c | 11 | 5  | 1,943507258 | intermediary metabolism and respiration |



|         |    |   |             |                                         |
|---------|----|---|-------------|-----------------------------------------|
| Rv3530c | 1  | 0 | 1,943507258 | intermediary metabolism and respiration |
| Rv3538  | 2  | 0 | 1,943507258 | intermediary metabolism and respiration |
| Rv3551  | 2  | 1 | 1,943507258 | intermediary metabolism and respiration |
| Rv3552  | 2  | 0 | 1,943507258 | intermediary metabolism and respiration |
| Rv3553  | 2  | 0 | 1,943507258 | intermediary metabolism and respiration |
| Rv3559c | 2  | 1 | 1,943507258 | intermediary metabolism and respiration |
| Rv3565  | 2  | 0 | 1,943507258 | intermediary metabolism and respiration |
| Rv3567c | 2  | 1 | 1,943507258 | intermediary metabolism and respiration |
| Rv3568c | 16 | 6 | 1,943507258 | intermediary metabolism and respiration |
| Rv3571  | 4  | 2 | 1,943507258 | intermediary metabolism and respiration |
| Rv3609c | 14 | 6 | 1,943507258 | intermediary metabolism and respiration |
| Rv3618  | 2  | 1 | 1,943507258 | intermediary metabolism and respiration |
| Rv3631  | 5  | 2 | 1,943507258 | intermediary metabolism and respiration |
| Rv3671c | 11 | 5 | 1,943507258 | intermediary metabolism and respiration |
| Rv3700c | 2  | 1 | 1,943507258 | intermediary metabolism and respiration |
| Rv3712  | 2  | 1 | 1,943507258 | intermediary metabolism and respiration |
| Rv3741c | 0  | 0 | 1,943507258 | intermediary metabolism and respiration |
| Rv3772  | 2  | 1 | 1,943507258 | intermediary metabolism and respiration |
| Rv3775  | 10 | 4 | 1,943507258 | intermediary metabolism and respiration |
| Rv3777  | 7  | 2 | 1,943507258 | intermediary metabolism and respiration |
| Rv3784  | 1  | 0 | 1,943507258 | intermediary metabolism and respiration |
| Rv3814c | 23 | 9 | 1,943507258 | intermediary metabolism and respiration |
| Rv3829c | 3  | 1 | 1,943507258 | intermediary metabolism and respiration |
| Rv3838c | 6  | 2 | 1,943507258 | intermediary metabolism and respiration |
| Rv3886c | 4  | 2 | 1,943507258 | intermediary metabolism and respiration |
| Rv3913  | 12 | 5 | 1,943507258 | intermediary metabolism and respiration |
| Rv0326  | 1  | 0 | 1,943507258 | unknown                                 |
| Rv1506c | 6  | 2 | 1,943507258 | unknown                                 |
| Rv1507A | 0  | 0 | 1,943507258 | unknown                                 |
| Rv1742  | 2  | 1 | 1,943507258 | unknown                                 |
| Rv2292c | 1  | 0 | 1,943507258 | unknown                                 |
| Rv2818c | 3  | 1 | 1,943507258 | unknown                                 |
| Rv3599c | 4  | 1 | 1,943507258 | unknown                                 |
| Rv0015c | 17 | 7 | 1,943507258 | regulatory proteins                     |

|         |    |    |                                 |
|---------|----|----|---------------------------------|
| Rv0018c | 14 | 5  | 1,943507258 regulatory proteins |
| Rv0022c | 0  | 0  | 1,943507258 regulatory proteins |
| Rv0067c | 1  | 0  | 1,943507258 regulatory proteins |
| Rv0078  | 4  | 1  | 1,943507258 regulatory proteins |
| Rv0081  | 14 | 5  | 1,943507258 regulatory proteins |
| Rv0117  | 2  | 0  | 1,943507258 regulatory proteins |
| Rv0195  | 0  | 0  | 1,943507258 regulatory proteins |
| Rv0324  | 7  | 2  | 1,943507258 regulatory proteins |
| Rv0328  | 2  | 1  | 1,943507258 regulatory proteins |
| Rv0339c | 2  | 0  | 1,943507258 regulatory proteins |
| Rv0377  | 4  | 1  | 1,943507258 regulatory proteins |
| Rv0386  | 3  | 1  | 1,943507258 regulatory proteins |
| Rv0474  | 20 | 8  | 1,943507258 regulatory proteins |
| Rv0494  | 1  | 0  | 1,943507258 regulatory proteins |
| Rv0576  | 6  | 2  | 1,943507258 regulatory proteins |
| Rv0600c | 0  | 0  | 1,943507258 regulatory proteins |
| Rv0601c | 0  | 0  | 1,943507258 regulatory proteins |
| Rv0602c | 0  | 0  | 1,943507258 regulatory proteins |
| Rv0653c | 1  | 0  | 1,943507258 regulatory proteins |
| Rv0681  | 9  | 3  | 1,943507258 regulatory proteins |
| Rv0737  | 2  | 1  | 1,943507258 regulatory proteins |
| Rv0823c | 33 | 13 | 1,943507258 regulatory proteins |
| Rv0844c | 9  | 4  | 1,943507258 regulatory proteins |
| Rv0845  | 2  | 1  | 1,943507258 regulatory proteins |
| Rv0890c | 4  | 2  | 1,943507258 regulatory proteins |
| Rv0894  | 1  | 0  | 1,943507258 regulatory proteins |
| Rv0931c | 55 | 22 | 1,943507258 regulatory proteins |
| Rv0967  | 55 | 23 | 1,943507258 regulatory proteins |
| Rv1027c | 2  | 0  | 1,943507258 regulatory proteins |
| Rv1028c | 3  | 1  | 1,943507258 regulatory proteins |
| Rv1129c | 2  | 1  | 1,943507258 regulatory proteins |
| Rv1267c | 2  | 0  | 1,943507258 regulatory proteins |
| Rv1353c | 1  | 0  | 1,943507258 regulatory proteins |
| Rv1358  | 0  | 0  | 1,943507258 regulatory proteins |

|         |    |    |                                 |
|---------|----|----|---------------------------------|
| Rv1359  | 1  | 0  | 1,943507258 regulatory proteins |
| Rv1395  | 4  | 1  | 1,943507258 regulatory proteins |
| Rv1453  | 0  | 0  | 1,943507258 regulatory proteins |
| Rv1460  | 6  | 2  | 1,943507258 regulatory proteins |
| Rv1473A | 11 | 5  | 1,943507258 regulatory proteins |
| Rv1626  | 57 | 24 | 1,943507258 regulatory proteins |
| Rv1657  | 5  | 2  | 1,943507258 regulatory proteins |
| Rv1674c | 1  | 0  | 1,943507258 regulatory proteins |
| Rv1675c | 1  | 0  | 1,943507258 regulatory proteins |
| Rv1746  | 3  | 1  | 1,943507258 regulatory proteins |
| Rv1773c | 2  | 1  | 1,943507258 regulatory proteins |
| Rv1776c | 1  | 0  | 1,943507258 regulatory proteins |
| Rv1963c | 4  | 1  | 1,943507258 regulatory proteins |
| Rv2011c | 1  | 0  | 1,943507258 regulatory proteins |
| Rv2017  | 3  | 1  | 1,943507258 regulatory proteins |
| Rv2160c | 0  | 0  | 1,943507258 regulatory proteins |
| Rv2175c | 2  | 1  | 1,943507258 regulatory proteins |
| Rv2176  | 3  | 1  | 1,943507258 regulatory proteins |
| Rv2232  | 7  | 2  | 1,943507258 regulatory proteins |
| Rv2282c | 1  | 0  | 1,943507258 regulatory proteins |
| Rv2324  | 2  | 0  | 1,943507258 regulatory proteins |
| Rv2488c | 2  | 1  | 1,943507258 regulatory proteins |
| Rv2506  | 4  | 1  | 1,943507258 regulatory proteins |
| Rv2779c | 3  | 1  | 1,943507258 regulatory proteins |
| Rv2884  | 6  | 2  | 1,943507258 regulatory proteins |
| Rv2912c | 3  | 1  | 1,943507258 regulatory proteins |
| Rv3066  | 1  | 0  | 1,943507258 regulatory proteins |
| Rv3080c | 3  | 1  | 1,943507258 regulatory proteins |
| Rv3124  | 1  | 0  | 1,943507258 regulatory proteins |
| Rv3143  | 1  | 0  | 1,943507258 regulatory proteins |
| Rv3167c | 1  | 0  | 1,943507258 regulatory proteins |
| Rv3183  | 1  | 0  | 1,943507258 regulatory proteins |
| Rv3197A | 3  | 1  | 1,943507258 regulatory proteins |
| Rv3208  | 24 | 10 | 1,943507258 regulatory proteins |

|         |    |   |                                     |
|---------|----|---|-------------------------------------|
| Rv3405c | 3  | 1 | 1,943507258 regulatory proteins     |
| Rv3574  | 8  | 3 | 1,943507258 regulatory proteins     |
| Rv3736  | 5  | 2 | 1,943507258 regulatory proteins     |
| Rv3830c | 1  | 0 | 1,943507258 regulatory proteins     |
| Rv3833  | 0  | 0 | 1,943507258 regulatory proteins     |
| Rv3840  | 0  | 0 | 1,943507258 regulatory proteins     |
| Rv0004  | 10 | 4 | 1,943507258 conserved hypotheticals |
| Rv0021c | 4  | 1 | 1,943507258 conserved hypotheticals |
| Rv0026  | 2  | 1 | 1,943507258 conserved hypotheticals |
| Rv0027  | 1  | 0 | 1,943507258 conserved hypotheticals |
| Rv0028  | 2  | 1 | 1,943507258 conserved hypotheticals |
| Rv0030  | 7  | 3 | 1,943507258 conserved hypotheticals |
| Rv0034  | 0  | 0 | 1,943507258 conserved hypotheticals |
| Rv0036c | 9  | 4 | 1,943507258 conserved hypotheticals |
| Rv0052  | 4  | 2 | 1,943507258 conserved hypotheticals |
| Rv0061  | 2  | 1 | 1,943507258 conserved hypotheticals |
| Rv0104  | 2  | 1 | 1,943507258 conserved hypotheticals |
| Rv0122  | 5  | 2 | 1,943507258 conserved hypotheticals |
| Rv0142  | 4  | 1 | 1,943507258 conserved hypotheticals |
| Rv0150c | 1  | 0 | 1,943507258 conserved hypotheticals |
| Rv0184  | 5  | 2 | 1,943507258 conserved hypotheticals |
| Rv0193c | 1  | 0 | 1,943507258 conserved hypotheticals |
| Rv0209  | 5  | 2 | 1,943507258 conserved hypotheticals |
| Rv0257  | 7  | 2 | 1,943507258 conserved hypotheticals |
| Rv0258c | 7  | 2 | 1,943507258 conserved hypotheticals |
| Rv0259c | 1  | 0 | 1,943507258 conserved hypotheticals |
| Rv0269c | 5  | 2 | 1,943507258 conserved hypotheticals |
| Rv0295c | 5  | 2 | 1,943507258 conserved hypotheticals |
| Rv0310c | 1  | 0 | 1,943507258 conserved hypotheticals |
| Rv0329c | 1  | 0 | 1,943507258 conserved hypotheticals |
| Rv0330c | 1  | 0 | 1,943507258 conserved hypotheticals |
| Rv0345  | 11 | 4 | 1,943507258 conserved hypotheticals |
| Rv0356c | 4  | 1 | 1,943507258 conserved hypotheticals |
| Rv0358  | 2  | 1 | 1,943507258 conserved hypotheticals |

|         |    |   |                                     |
|---------|----|---|-------------------------------------|
| Rv0360c | 8  | 3 | 1,943507258 conserved hypotheticals |
| Rv0366c | 0  | 0 | 1,943507258 conserved hypotheticals |
| Rv0368c | 0  | 0 | 1,943507258 conserved hypotheticals |
| Rv0371c | 0  | 0 | 1,943507258 conserved hypotheticals |
| Rv0372c | 1  | 0 | 1,943507258 conserved hypotheticals |
| Rv0378  | 0  | 0 | 1,943507258 conserved hypotheticals |
| Rv0381c | 5  | 2 | 1,943507258 conserved hypotheticals |
| Rv0387c | 2  | 0 | 1,943507258 conserved hypotheticals |
| Rv0395  | 1  | 0 | 1,943507258 conserved hypotheticals |
| Rv0441c | 4  | 2 | 1,943507258 conserved hypotheticals |
| Rv0448c | 1  | 0 | 1,943507258 conserved hypotheticals |
| Rv0449c | 7  | 2 | 1,943507258 conserved hypotheticals |
| Rv0454  | 0  | 0 | 1,943507258 conserved hypotheticals |
| Rv0481c | 2  | 1 | 1,943507258 conserved hypotheticals |
| Rv0492A | 2  | 0 | 1,943507258 conserved hypotheticals |
| Rv0493c | 2  | 0 | 1,943507258 conserved hypotheticals |
| Rv0499  | 12 | 5 | 1,943507258 conserved hypotheticals |
| Rv0504c | 13 | 5 | 1,943507258 conserved hypotheticals |
| Rv0523c | 2  | 0 | 1,943507258 conserved hypotheticals |
| Rv0540  | 3  | 1 | 1,943507258 conserved hypotheticals |
| Rv0546c | 11 | 4 | 1,943507258 conserved hypotheticals |
| Rv0571c | 2  | 1 | 1,943507258 conserved hypotheticals |
| Rv0574c | 4  | 1 | 1,943507258 conserved hypotheticals |
| Rv0597c | 9  | 3 | 1,943507258 conserved hypotheticals |
| Rv0607  | 1  | 0 | 1,943507258 conserved hypotheticals |
| Rv0610c | 3  | 1 | 1,943507258 conserved hypotheticals |
| Rv0612  | 2  | 1 | 1,943507258 conserved hypotheticals |
| Rv0614  | 0  | 0 | 1,943507258 conserved hypotheticals |
| Rv0616c | 0  | 0 | 1,943507258 conserved hypotheticals |
| Rv0647c | 4  | 2 | 1,943507258 conserved hypotheticals |
| Rv0674  | 4  | 2 | 1,943507258 conserved hypotheticals |
| Rv0689c | 0  | 0 | 1,943507258 conserved hypotheticals |
| Rv0699  | 0  | 0 | 1,943507258 conserved hypotheticals |
| Rv0738  | 4  | 1 | 1,943507258 conserved hypotheticals |

|         |    |   |                                     |
|---------|----|---|-------------------------------------|
| Rv0740  | 4  | 2 | 1,943507258 conserved hypotheticals |
| Rv0745  | 0  | 0 | 1,943507258 conserved hypotheticals |
| Rv0762c | 2  | 1 | 1,943507258 conserved hypotheticals |
| Rv0785  | 4  | 2 | 1,943507258 conserved hypotheticals |
| Rv0787  | 2  | 1 | 1,943507258 conserved hypotheticals |
| Rv0789c | 1  | 0 | 1,943507258 conserved hypotheticals |
| Rv0790c | 1  | 0 | 1,943507258 conserved hypotheticals |
| Rv0791c | 2  | 0 | 1,943507258 conserved hypotheticals |
| Rv0822c | 5  | 2 | 1,943507258 conserved hypotheticals |
| Rv0836c | 0  | 0 | 1,943507258 conserved hypotheticals |
| Rv0837c | 1  | 0 | 1,943507258 conserved hypotheticals |
| Rv0862c | 2  | 1 | 1,943507258 conserved hypotheticals |
| Rv0887c | 1  | 0 | 1,943507258 conserved hypotheticals |
| Rv0910  | 21 | 9 | 1,943507258 conserved hypotheticals |
| Rv0918  | 1  | 0 | 1,943507258 conserved hypotheticals |
| Rv0926c | 4  | 1 | 1,943507258 conserved hypotheticals |
| Rv0942  | 0  | 0 | 1,943507258 conserved hypotheticals |
| Rv0959  | 4  | 2 | 1,943507258 conserved hypotheticals |
| Rv0963c | 1  | 0 | 1,943507258 conserved hypotheticals |
| Rv0964c | 0  | 0 | 1,943507258 conserved hypotheticals |
| Rv0992c | 11 | 4 | 1,943507258 conserved hypotheticals |
| Rv0998  | 11 | 4 | 1,943507258 conserved hypotheticals |
| Rv0999  | 4  | 1 | 1,943507258 conserved hypotheticals |
| Rv1000c | 6  | 2 | 1,943507258 conserved hypotheticals |
| Rv1021  | 7  | 2 | 1,943507258 conserved hypotheticals |
| Rv1044  | 2  | 0 | 1,943507258 conserved hypotheticals |
| Rv1048c | 2  | 1 | 1,943507258 conserved hypotheticals |
| Rv1051c | 0  | 0 | 1,943507258 conserved hypotheticals |
| Rv1053c | 0  | 0 | 1,943507258 conserved hypotheticals |
| Rv1056  | 1  | 0 | 1,943507258 conserved hypotheticals |
| Rv1061  | 2  | 1 | 1,943507258 conserved hypotheticals |
| Rv1062  | 2  | 1 | 1,943507258 conserved hypotheticals |
| Rv1069c | 6  | 2 | 1,943507258 conserved hypotheticals |
| Rv1084  | 2  | 1 | 1,943507258 conserved hypotheticals |

|         |    |   |                                     |
|---------|----|---|-------------------------------------|
| Rv1111c | 9  | 4 | 1,943507258 conserved hypotheticals |
| Rv1116  | 1  | 0 | 1,943507258 conserved hypotheticals |
| Rv1119c | 0  | 0 | 1,943507258 conserved hypotheticals |
| Rv1120c | 0  | 0 | 1,943507258 conserved hypotheticals |
| Rv1134  | 2  | 1 | 1,943507258 conserved hypotheticals |
| Rv1147  | 2  | 1 | 1,943507258 conserved hypotheticals |
| Rv1154c | 4  | 1 | 1,943507258 conserved hypotheticals |
| Rv1158c | 6  | 2 | 1,943507258 conserved hypotheticals |
| Rv1176c | 1  | 0 | 1,943507258 conserved hypotheticals |
| Rv1190  | 1  | 0 | 1,943507258 conserved hypotheticals |
| Rv1191  | 2  | 1 | 1,943507258 conserved hypotheticals |
| Rv1204c | 4  | 2 | 1,943507258 conserved hypotheticals |
| Rv1205  | 10 | 4 | 1,943507258 conserved hypotheticals |
| Rv1225c | 2  | 1 | 1,943507258 conserved hypotheticals |
| Rv1251c | 3  | 1 | 1,943507258 conserved hypotheticals |
| Rv1261c | 12 | 5 | 1,943507258 conserved hypotheticals |
| Rv1262c | 2  | 1 | 1,943507258 conserved hypotheticals |
| Rv1268c | 0  | 0 | 1,943507258 conserved hypotheticals |
| Rv1276c | 1  | 0 | 1,943507258 conserved hypotheticals |
| Rv1322  | 3  | 1 | 1,943507258 conserved hypotheticals |
| Rv1351  | 8  | 3 | 1,943507258 conserved hypotheticals |
| Rv1354c | 1  | 0 | 1,943507258 conserved hypotheticals |
| Rv1356c | 1  | 0 | 1,943507258 conserved hypotheticals |
| Rv1357c | 0  | 0 | 1,943507258 conserved hypotheticals |
| Rv1367c | 2  | 1 | 1,943507258 conserved hypotheticals |
| Rv1374c | 1  | 0 | 1,943507258 conserved hypotheticals |
| Rv1375  | 3  | 1 | 1,943507258 conserved hypotheticals |
| Rv1376  | 3  | 1 | 1,943507258 conserved hypotheticals |
| Rv1434  | 2  | 1 | 1,943507258 conserved hypotheticals |
| Rv1443c | 5  | 2 | 1,943507258 conserved hypotheticals |
| Rv1455  | 1  | 0 | 1,943507258 conserved hypotheticals |
| Rv1482c | 0  | 0 | 1,943507258 conserved hypotheticals |
| Rv1499  | 1  | 0 | 1,943507258 conserved hypotheticals |
| Rv1501  | 7  | 2 | 1,943507258 conserved hypotheticals |

|         |    |    |                                     |
|---------|----|----|-------------------------------------|
| Rv1503c | 2  | 0  | 1,943507258 conserved hypotheticals |
| Rv1504c | 1  | 0  | 1,943507258 conserved hypotheticals |
| Rv1514c | 2  | 1  | 1,943507258 conserved hypotheticals |
| Rv1515c | 2  | 0  | 1,943507258 conserved hypotheticals |
| Rv1518  | 0  | 0  | 1,943507258 conserved hypotheticals |
| Rv1519  | 1  | 0  | 1,943507258 conserved hypotheticals |
| Rv1546  | 12 | 5  | 1,943507258 conserved hypotheticals |
| Rv1597  | 4  | 1  | 1,943507258 conserved hypotheticals |
| Rv1632c | 4  | 2  | 1,943507258 conserved hypotheticals |
| Rv1637c | 2  | 1  | 1,943507258 conserved hypotheticals |
| Rv1680  | 5  | 2  | 1,943507258 conserved hypotheticals |
| Rv1685c | 2  | 0  | 1,943507258 conserved hypotheticals |
| Rv1691  | 4  | 2  | 1,943507258 conserved hypotheticals |
| Rv1706A | 0  | 0  | 1,943507258 conserved hypotheticals |
| Rv1716  | 2  | 1  | 1,943507258 conserved hypotheticals |
| Rv1717  | 2  | 0  | 1,943507258 conserved hypotheticals |
| Rv1718  | 5  | 2  | 1,943507258 conserved hypotheticals |
| Rv1724c | 2  | 0  | 1,943507258 conserved hypotheticals |
| Rv1727  | 1  | 0  | 1,943507258 conserved hypotheticals |
| Rv1732c | 6  | 2  | 1,943507258 conserved hypotheticals |
| Rv1734c | 0  | 0  | 1,943507258 conserved hypotheticals |
| Rv1754c | 1  | 0  | 1,943507258 conserved hypotheticals |
| Rv1770  | 47 | 19 | 1,943507258 conserved hypotheticals |
| Rv1778c | 3  | 1  | 1,943507258 conserved hypotheticals |
| Rv1780  | 3  | 1  | 1,943507258 conserved hypotheticals |
| Rv1805c | 0  | 0  | 1,943507258 conserved hypotheticals |
| Rv1825  | 4  | 2  | 1,943507258 conserved hypotheticals |
| Rv1828  | 42 | 17 | 1,943507258 conserved hypotheticals |
| Rv1868  | 4  | 1  | 1,943507258 conserved hypotheticals |
| Rv1873  | 0  | 0  | 1,943507258 conserved hypotheticals |
| Rv1875  | 9  | 3  | 1,943507258 conserved hypotheticals |
| Rv1879  | 0  | 0  | 1,943507258 conserved hypotheticals |
| Rv1889c | 0  | 0  | 1,943507258 conserved hypotheticals |
| Rv1890c | 2  | 0  | 1,943507258 conserved hypotheticals |



|         |    |    |                                     |
|---------|----|----|-------------------------------------|
| Rv1896c | 4  | 1  | 1,943507258 conserved hypotheticals |
| Rv1913  | 1  | 0  | 1,943507258 conserved hypotheticals |
| Rv1919c | 41 | 17 | 1,943507258 conserved hypotheticals |
| Rv1929c | 7  | 3  | 1,943507258 conserved hypotheticals |
| Rv1930c | 0  | 0  | 1,943507258 conserved hypotheticals |
| Rv1948c | 2  | 0  | 1,943507258 conserved hypotheticals |
| Rv1949c | 3  | 1  | 1,943507258 conserved hypotheticals |
| Rv1951c | 3  | 1  | 1,943507258 conserved hypotheticals |
| Rv1954c | 0  | 0  | 1,943507258 conserved hypotheticals |
| Rv1957  | 2  | 1  | 1,943507258 conserved hypotheticals |
| Rv1958c | 2  | 0  | 1,943507258 conserved hypotheticals |
| Rv1961  | 0  | 0  | 1,943507258 conserved hypotheticals |
| Rv1975  | 0  | 0  | 1,943507258 conserved hypotheticals |
| Rv1976c | 26 | 10 | 1,943507258 conserved hypotheticals |
| Rv1995  | 1  | 0  | 1,943507258 conserved hypotheticals |
| Rv1998c | 2  | 1  | 1,943507258 conserved hypotheticals |
| Rv2000  | 1  | 0  | 1,943507258 conserved hypotheticals |
| Rv2001  | 2  | 1  | 1,943507258 conserved hypotheticals |
| Rv2004c | 7  | 3  | 1,943507258 conserved hypotheticals |
| Rv2008c | 1  | 0  | 1,943507258 conserved hypotheticals |
| Rv2012  | 0  | 0  | 1,943507258 conserved hypotheticals |
| Rv2015c | 30 | 12 | 1,943507258 conserved hypotheticals |
| Rv2016  | 2  | 1  | 1,943507258 conserved hypotheticals |
| Rv2019  | 2  | 1  | 1,943507258 conserved hypotheticals |
| Rv2042c | 6  | 2  | 1,943507258 conserved hypotheticals |
| Rv2059  | 1  | 0  | 1,943507258 conserved hypotheticals |
| Rv2082  | 5  | 2  | 1,943507258 conserved hypotheticals |
| Rv2117  | 1  | 0  | 1,943507258 conserved hypotheticals |
| Rv2119  | 2  | 1  | 1,943507258 conserved hypotheticals |
| Rv2135c | 11 | 4  | 1,943507258 conserved hypotheticals |
| Rv2148c | 9  | 4  | 1,943507258 conserved hypotheticals |
| Rv2183c | 16 | 6  | 1,943507258 conserved hypotheticals |
| Rv2227  | 0  | 0  | 1,943507258 conserved hypotheticals |
| Rv2230c | 9  | 3  | 1,943507258 conserved hypotheticals |

|         |    |   |                                     |
|---------|----|---|-------------------------------------|
| Rv2242  | 5  | 2 | 1,943507258 conserved hypotheticals |
| Rv2267c | 2  | 0 | 1,943507258 conserved hypotheticals |
| Rv2269c | 0  | 0 | 1,943507258 conserved hypotheticals |
| Rv2283  | 0  | 0 | 1,943507258 conserved hypotheticals |
| Rv2300c | 2  | 0 | 1,943507258 conserved hypotheticals |
| Rv2305  | 3  | 1 | 1,943507258 conserved hypotheticals |
| Rv2307A | 2  | 1 | 1,943507258 conserved hypotheticals |
| Rv2307B | 0  | 0 | 1,943507258 conserved hypotheticals |
| Rv2307c | 4  | 2 | 1,943507258 conserved hypotheticals |
| Rv2307D | 4  | 2 | 1,943507258 conserved hypotheticals |
| Rv2308  | 2  | 0 | 1,943507258 conserved hypotheticals |
| Rv2309A | 2  | 0 | 1,943507258 conserved hypotheticals |
| Rv2311  | 2  | 0 | 1,943507258 conserved hypotheticals |
| Rv2312  | 1  | 0 | 1,943507258 conserved hypotheticals |
| Rv2323c | 1  | 0 | 1,943507258 conserved hypotheticals |
| Rv2336  | 2  | 0 | 1,943507258 conserved hypotheticals |
| Rv2337c | 6  | 2 | 1,943507258 conserved hypotheticals |
| Rv2367c | 18 | 7 | 1,943507258 conserved hypotheticals |
| Rv2370c | 1  | 0 | 1,943507258 conserved hypotheticals |
| Rv2401  | 0  | 0 | 1,943507258 conserved hypotheticals |
| Rv2405  | 11 | 5 | 1,943507258 conserved hypotheticals |
| Rv2407  | 1  | 0 | 1,943507258 conserved hypotheticals |
| Rv2418c | 9  | 4 | 1,943507258 conserved hypotheticals |
| Rv2422  | 0  | 0 | 1,943507258 conserved hypotheticals |
| Rv2423  | 1  | 0 | 1,943507258 conserved hypotheticals |
| Rv2438A | 0  | 0 | 1,943507258 conserved hypotheticals |
| Rv2449c | 13 | 5 | 1,943507258 conserved hypotheticals |
| Rv2451  | 1  | 0 | 1,943507258 conserved hypotheticals |
| Rv2452c | 3  | 1 | 1,943507258 conserved hypotheticals |
| Rv2478c | 7  | 3 | 1,943507258 conserved hypotheticals |
| Rv2481c | 0  | 0 | 1,943507258 conserved hypotheticals |
| Rv2489c | 2  | 0 | 1,943507258 conserved hypotheticals |
| Rv2492  | 2  | 0 | 1,943507258 conserved hypotheticals |
| Rv2510c | 3  | 1 | 1,943507258 conserved hypotheticals |

|         |    |    |                                     |
|---------|----|----|-------------------------------------|
| Rv2515c | 3  | 1  | 1,943507258 conserved hypotheticals |
| Rv2529  | 0  | 0  | 1,943507258 conserved hypotheticals |
| Rv2541  | 4  | 1  | 1,943507258 conserved hypotheticals |
| Rv2565  | 4  | 2  | 1,943507258 conserved hypotheticals |
| Rv2566  | 3  | 1  | 1,943507258 conserved hypotheticals |
| Rv2567  | 7  | 3  | 1,943507258 conserved hypotheticals |
| Rv2568c | 4  | 1  | 1,943507258 conserved hypotheticals |
| Rv2569c | 5  | 2  | 1,943507258 conserved hypotheticals |
| Rv2570  | 1  | 0  | 1,943507258 conserved hypotheticals |
| Rv2573  | 0  | 0  | 1,943507258 conserved hypotheticals |
| Rv2577  | 0  | 0  | 1,943507258 conserved hypotheticals |
| Rv2598  | 2  | 1  | 1,943507258 conserved hypotheticals |
| Rv2614A | 1  | 0  | 1,943507258 conserved hypotheticals |
| Rv2629  | 38 | 16 | 1,943507258 conserved hypotheticals |
| Rv2630  | 8  | 3  | 1,943507258 conserved hypotheticals |
| Rv2631  | 4  | 2  | 1,943507258 conserved hypotheticals |
| Rv2635  | 0  | 0  | 1,943507258 conserved hypotheticals |
| Rv2636  | 2  | 0  | 1,943507258 conserved hypotheticals |
| Rv2644c | 0  | 0  | 1,943507258 conserved hypotheticals |
| Rv2660c | 0  | 0  | 1,943507258 conserved hypotheticals |
| Rv2661c | 3  | 1  | 1,943507258 conserved hypotheticals |
| Rv2665  | 16 | 6  | 1,943507258 conserved hypotheticals |
| Rv2670c | 1  | 0  | 1,943507258 conserved hypotheticals |
| Rv2681  | 5  | 2  | 1,943507258 conserved hypotheticals |
| Rv2689c | 3  | 1  | 1,943507258 conserved hypotheticals |
| Rv2706c | 0  | 0  | 1,943507258 conserved hypotheticals |
| Rv2714  | 10 | 4  | 1,943507258 conserved hypotheticals |
| Rv2722  | 2  | 0  | 1,943507258 conserved hypotheticals |
| Rv2731  | 8  | 3  | 1,943507258 conserved hypotheticals |
| Rv2733c | 5  | 2  | 1,943507258 conserved hypotheticals |
| Rv2734  | 4  | 1  | 1,943507258 conserved hypotheticals |
| Rv2735c | 4  | 1  | 1,943507258 conserved hypotheticals |
| Rv2737A | 0  | 0  | 1,943507258 conserved hypotheticals |
| Rv2742c | 2  | 1  | 1,943507258 conserved hypotheticals |

|         |    |    |                                     |
|---------|----|----|-------------------------------------|
| Rv2751  | 9  | 3  | 1,943507258 conserved hypotheticals |
| Rv2774c | 3  | 1  | 1,943507258 conserved hypotheticals |
| Rv2778c | 28 | 12 | 1,943507258 conserved hypotheticals |
| Rv2787  | 2  | 1  | 1,943507258 conserved hypotheticals |
| Rv2797c | 3  | 1  | 1,943507258 conserved hypotheticals |
| Rv2804c | 0  | 0  | 1,943507258 conserved hypotheticals |
| Rv2805  | 9  | 3  | 1,943507258 conserved hypotheticals |
| Rv2807  | 0  | 0  | 1,943507258 conserved hypotheticals |
| Rv2808  | 2  | 1  | 1,943507258 conserved hypotheticals |
| Rv2813  | 0  | 0  | 1,943507258 conserved hypotheticals |
| Rv2817c | 1  | 0  | 1,943507258 conserved hypotheticals |
| Rv2827c | 8  | 3  | 1,943507258 conserved hypotheticals |
| Rv2854  | 3  | 1  | 1,943507258 conserved hypotheticals |
| Rv2862c | 5  | 2  | 1,943507258 conserved hypotheticals |
| Rv2891  | 0  | 0  | 1,943507258 conserved hypotheticals |
| Rv2896c | 4  | 2  | 1,943507258 conserved hypotheticals |
| Rv2897c | 1  | 0  | 1,943507258 conserved hypotheticals |
| Rv2898c | 13 | 5  | 1,943507258 conserved hypotheticals |
| Rv2910c | 9  | 4  | 1,943507258 conserved hypotheticals |
| Rv2917  | 1  | 0  | 1,943507258 conserved hypotheticals |
| Rv2970A | 13 | 5  | 1,943507258 conserved hypotheticals |
| Rv2974c | 3  | 1  | 1,943507258 conserved hypotheticals |
| Rv2983  | 0  | 0  | 1,943507258 conserved hypotheticals |
| Rv2991  | 5  | 2  | 1,943507258 conserved hypotheticals |
| Rv2998A | 0  | 0  | 1,943507258 conserved hypotheticals |
| Rv3015c | 4  | 1  | 1,943507258 conserved hypotheticals |
| Rv3026c | 2  | 1  | 1,943507258 conserved hypotheticals |
| Rv3035  | 4  | 2  | 1,943507258 conserved hypotheticals |
| Rv3047c | 7  | 3  | 1,943507258 conserved hypotheticals |
| Rv3067  | 3  | 1  | 1,943507258 conserved hypotheticals |
| Rv3071  | 1  | 0  | 1,943507258 conserved hypotheticals |
| Rv3073c | 4  | 2  | 1,943507258 conserved hypotheticals |
| Rv3074  | 2  | 1  | 1,943507258 conserved hypotheticals |
| Rv3079c | 2  | 1  | 1,943507258 conserved hypotheticals |

|         |    |    |                                     |
|---------|----|----|-------------------------------------|
| Rv3091  | 3  | 1  | 1,943507258 conserved hypotheticals |
| Rv3094c | 7  | 3  | 1,943507258 conserved hypotheticals |
| Rv3096  | 7  | 3  | 1,943507258 conserved hypotheticals |
| Rv3108  | 0  | 0  | 1,943507258 conserved hypotheticals |
| Rv3114  | 0  | 0  | 1,943507258 conserved hypotheticals |
| Rv3126c | 0  | 0  | 1,943507258 conserved hypotheticals |
| Rv3129  | 0  | 0  | 1,943507258 conserved hypotheticals |
| Rv3165c | 2  | 0  | 1,943507258 conserved hypotheticals |
| Rv3166c | 3  | 1  | 1,943507258 conserved hypotheticals |
| Rv3178  | 0  | 0  | 1,943507258 conserved hypotheticals |
| Rv3179  | 2  | 0  | 1,943507258 conserved hypotheticals |
| Rv3181c | 1  | 0  | 1,943507258 conserved hypotheticals |
| Rv3192  | 0  | 0  | 1,943507258 conserved hypotheticals |
| Rv3195  | 2  | 1  | 1,943507258 conserved hypotheticals |
| Rv3196  | 0  | 0  | 1,943507258 conserved hypotheticals |
| Rv3196A | 3  | 1  | 1,943507258 conserved hypotheticals |
| Rv3212  | 20 | 8  | 1,943507258 conserved hypotheticals |
| Rv3235  | 1  | 0  | 1,943507258 conserved hypotheticals |
| Rv3242c | 4  | 1  | 1,943507258 conserved hypotheticals |
| Rv3254  | 4  | 2  | 1,943507258 conserved hypotheticals |
| Rv3259  | 2  | 1  | 1,943507258 conserved hypotheticals |
| Rv3294c | 0  | 0  | 1,943507258 conserved hypotheticals |
| Rv3333c | 1  | 0  | 1,943507258 conserved hypotheticals |
| Rv3337  | 47 | 19 | 1,943507258 conserved hypotheticals |
| Rv3338  | 7  | 2  | 1,943507258 conserved hypotheticals |
| Rv3351c | 0  | 0  | 1,943507258 conserved hypotheticals |
| Rv3353c | 2  | 0  | 1,943507258 conserved hypotheticals |
| Rv3415c | 2  | 1  | 1,943507258 conserved hypotheticals |
| Rv3421c | 4  | 2  | 1,943507258 conserved hypotheticals |
| Rv3424c | 2  | 0  | 1,943507258 conserved hypotheticals |
| Rv3433c | 3  | 1  | 1,943507258 conserved hypotheticals |
| Rv3439c | 2  | 1  | 1,943507258 conserved hypotheticals |
| Rv3440c | 4  | 2  | 1,943507258 conserved hypotheticals |
| Rv3446c | 0  | 0  | 1,943507258 conserved hypotheticals |

|         |    |   |                                     |
|---------|----|---|-------------------------------------|
| Rv3463  | 2  | 0 | 1,943507258 conserved hypotheticals |
| Rv3471c | 0  | 0 | 1,943507258 conserved hypotheticals |
| Rv3488  | 3  | 1 | 1,943507258 conserved hypotheticals |
| Rv3493c | 4  | 2 | 1,943507258 conserved hypotheticals |
| Rv3517  | 2  | 0 | 1,943507258 conserved hypotheticals |
| Rv3521  | 2  | 0 | 1,943507258 conserved hypotheticals |
| Rv3527  | 2  | 0 | 1,943507258 conserved hypotheticals |
| Rv3529c | 2  | 1 | 1,943507258 conserved hypotheticals |
| Rv3555c | 2  | 1 | 1,943507258 conserved hypotheticals |
| Rv3577  | 5  | 2 | 1,943507258 conserved hypotheticals |
| Rv3594  | 3  | 1 | 1,943507258 conserved hypotheticals |
| Rv3611  | 1  | 0 | 1,943507258 conserved hypotheticals |
| Rv3639c | 1  | 0 | 1,943507258 conserved hypotheticals |
| Rv3643  | 0  | 0 | 1,943507258 conserved hypotheticals |
| Rv3655c | 1  | 0 | 1,943507258 conserved hypotheticals |
| Rv3662c | 4  | 1 | 1,943507258 conserved hypotheticals |
| Rv3691  | 5  | 2 | 1,943507258 conserved hypotheticals |
| Rv3698  | 2  | 1 | 1,943507258 conserved hypotheticals |
| Rv3701c | 11 | 5 | 1,943507258 conserved hypotheticals |
| Rv3706c | 2  | 1 | 1,943507258 conserved hypotheticals |
| Rv3714c | 2  | 1 | 1,943507258 conserved hypotheticals |
| Rv3730c | 4  | 1 | 1,943507258 conserved hypotheticals |
| Rv3745c | 0  | 0 | 1,943507258 conserved hypotheticals |
| Rv3770c | 2  | 1 | 1,943507258 conserved hypotheticals |
| Rv3776  | 1  | 0 | 1,943507258 conserved hypotheticals |
| Rv3785  | 7  | 2 | 1,943507258 conserved hypotheticals |
| Rv3786c | 3  | 1 | 1,943507258 conserved hypotheticals |
| Rv3787c | 1  | 0 | 1,943507258 conserved hypotheticals |
| Rv3788  | 7  | 2 | 1,943507258 conserved hypotheticals |
| Rv3796  | 2  | 0 | 1,943507258 conserved hypotheticals |
| Rv3831  | 1  | 0 | 1,943507258 conserved hypotheticals |
| Rv3832c | 0  | 0 | 1,943507258 conserved hypotheticals |
| Rv3836  | 2  | 1 | 1,943507258 conserved hypotheticals |
| Rv3861  | 2  | 0 | 1,943507258 conserved hypotheticals |

|         |    |   |                                     |    |
|---------|----|---|-------------------------------------|----|
| Rv3899c | 4  | 1 | 1,943507258 conserved hypotheticals |    |
| Rv3912  | 1  | 0 | 1,943507258 conserved hypotheticals |    |
| Rv3916c | 19 | 8 | 1,943507258 conserved hypotheticals |    |
| Rv4002  | 4  | 2 | 1,943507258                         | NA |
| Rv4006  | 0  | 0 | 1,943507258                         | NA |
| Rv4008  | 0  | 0 | 1,943507258                         | NA |
| Rv4013  | 0  | 0 | 1,943507258                         | NA |

---

NA: Non annotated

**Convention Description**

**DS RPKM** RPKM values for Dextrose stationary phase  
**FS RPKM** RPKM values for Fatty Acids stationary phase

**FDR Fisher Exact Test** Statistically significant differential expression between two conditions is determined by looking at genes with FDR values below 0.05.

**Top to bottom parts:** Genes are ordered from highest to lowest FDR values

Upper part: Genes with significant higher expression in FS *versus* DS

Middle part: Genes with significant lower expression in FS *versus* DS

Lower part: Genes with no significant differential expression

**Table S1B. Fisher Exact Test in Stationary Phase of Growth**

| GENES   | DS RPKM | FS RPKM | FDR Fisher Exact Test | FC/Tuberculist                          |
|---------|---------|---------|-----------------------|-----------------------------------------|
| Rv1169c | 213     | 3       | 2,88462E-14           | PE/PPE                                  |
| Rv0249c | 198     | 2       | 3,68546E-14           | intermediary metabolism and respiration |
| Rv2912c | 174     | 1       | 2,20006E-13           | regulatory proteins                     |
| Rv3583c | 616     | 57      | 4,40412E-13           | regulatory proteins                     |
| Rv0350  | 548     | 19      | 9,0376E-13            | virulence, detoxification, adaptation   |
| Rv0251c | 598     | 28      | 9,0376E-13            | virulence, detoxification, adaptation   |
| Rv0351  | 524     | 28      | 9,0376E-13            | virulence, detoxification, adaptation   |
| Rv1398c | 1041    | 61      | 9,0376E-13            | virulence, detoxification, adaptation   |
| Rv1528c | 171     | 117     | 9,0376E-13            | lipid metabolism                        |
| Rv3875  | 1252    | 124     | 9,0376E-13            | cell wall and cell processes            |
| Rv1793  | 128     | 110     | 9,0376E-13            | cell wall and cell processes            |
| Rv1806  | 415     | 22      | 9,0376E-13            | PE/PPE                                  |
| Rv2913c | 263     | 2       | 9,0376E-13            | intermediary metabolism and respiration |
| Rv3250c | 633     | 8       | 9,0376E-13            | intermediary metabolism and respiration |
| Rv3251c | 313     | 5       | 9,0376E-13            | intermediary metabolism and respiration |
| Rv0967  | 625     | 10      | 9,0376E-13            | regulatory proteins                     |
| Rv3219  | 671     | 346     | 9,0376E-13            | regulatory proteins                     |
| Rv0250c | 221     | 3       | 9,0376E-13            | conserved hypotheticals                 |



|         |      |     |                                                     |
|---------|------|-----|-----------------------------------------------------|
| Rv0968  | 609  | 9   | 9,0376E-13 conserved hypotheticals                  |
| Rv0678  | 345  | 6   | 9,0376E-13 conserved hypotheticals                  |
| Rv2517c | 635  | 16  | 9,0376E-13 conserved hypotheticals                  |
| Rv2694c | 376  | 17  | 9,0376E-13 conserved hypotheticals                  |
| Rv4014  | 2043 | 42  | 9,0376E-13 NA                                       |
| Rv3874  | 589  | 55  | 2,57918E-12 cell wall and cell processes            |
| Rv0136  | 188  | 3   | 3,80227E-12 intermediary metabolism and respiration |
| Rv0847  | 238  | 8   | 5,38757E-12 cell wall and cell processes            |
| Rv1990c | 119  | 86  | 8,96424E-12 regulatory proteins                     |
| Rv2516c | 210  | 6   | 2,19742E-11 conserved hypotheticals                 |
| Rv1221  | 612  | 63  | 5,9736E-11 information pathways                     |
| Rv0440  | 227  | 125 | 9,73387E-11 virulence, detoxification, adaptation   |
| Rv1533  | 219  | 8   | 1,67822E-10 conserved hypotheticals                 |
| Rv2780  | 343  | 26  | 2,10815E-09 intermediary metabolism and respiration |
| Rv0563  | 143  | 3   | 1,82895E-08 virulence, detoxification, adaptation   |
| Rv0140  | 158  | 5   | 5,12343E-08 conserved hypotheticals                 |
| Rv3841  | 156  | 5   | 7,59409E-08 intermediary metabolism and respiration |
| Rv3334  | 121  | 2   | 1,69272E-07 regulatory proteins                     |
| Rv1072  | 335  | 30  | 2,04734E-07 cell wall and cell processes            |
| Rv1955  | 104  | 1   | 3,62038E-07 virulence, detoxification, adaptation   |
| Rv3679  | 335  | 31  | 4,61465E-07 cell wall and cell processes            |
| Rv3406  | 101  | 1   | 5,382E-07 intermediary metabolism and respiration   |
| Rv1791  | 40   | 37  | 6,80388E-07 PE/PPE                                  |
| Rv2011c | 111  | 2   | 7,7697E-07 regulatory proteins                      |
| Rv1807  | 82   | 55  | 1,22745E-06 PE/PPE                                  |
| Rv0352  | 343  | 34  | 2,11896E-06 virulence, detoxification, adaptation   |
| Rv1168c | 118  | 3   | 2,12955E-06 PE/PPE                                  |
| Rv0302  | 94   | 1   | 2,82298E-06 regulatory proteins                     |
| Rv2707  | 154  | 8   | 6,23629E-06 conserved hypotheticals                 |
| Rv0233  | 87   | 1   | 9,27976E-06 information pathways                    |
| Rv0753c | 108  | 3   | 9,30719E-06 intermediary metabolism and respiration |
| Rv2699c | 78   | 50  | 1,02952E-05 conserved hypotheticals                 |
| Rv3252c | 106  | 3   | 1,34085E-05 lipid metabolism                        |
| Rv0791c | 86   | 1   | 1,45732E-05 conserved hypotheticals                 |

|         |     |    |                                                     |
|---------|-----|----|-----------------------------------------------------|
| Rv1956  | 83  | 1  | 2,06407E-05 virulence, detoxification, adaptation   |
| Rv3407  | 433 | 53 | 2,52582E-05 virulence, detoxification, adaptation   |
| Rv3408  | 92  | 2  | 2,62596E-05 virulence, detoxification, adaptation   |
| Rv0700  | 105 | 59 | 3,07435E-05 information pathways                    |
| Rv0353  | 152 | 9  | 4,01291E-05 virulence, detoxification, adaptation   |
| Rv0455c | 99  | 3  | 0,000065691 conserved hypotheticals                 |
| Rv3249c | 76  | 1  | 6,74152E-05 regulatory proteins                     |
| Rv3188  | 36  | 30 | 7,32169E-05 conserved hypotheticals                 |
| Rv0709  | 29  | 26 | 9,57129E-05 information pathways                    |
| Rv0685  | 23  | 23 | 0,000104241 information pathways                    |
| Rv2161c | 35  | 29 | 0,000107852 intermediary metabolism and respiration |
| Rv1334  | 94  | 3  | 0,000125578 intermediary metabolism and respiration |
| Rv2617c | 73  | 1  | 0,000151002 cell wall and cell processes            |
| Rv0885  | 46  | 33 | 0,000162151 conserved hypotheticals                 |
| Rv3248c | 101 | 4  | 0,000170808 intermediary metabolism and respiration |
| Rv0654  | 70  | 1  | 0,000216107 intermediary metabolism and respiration |
| Rv0969  | 98  | 4  | 0,000244073 cell wall and cell processes            |
| Rv2791c | 128 | 63 | 0,000272083 insertion seqs and phages               |
| Rv0991c | 335 | 41 | 0,000336166 conserved hypotheticals                 |
| Rv0077c | 77  | 2  | 0,0003725 intermediary metabolism and respiration   |
| Rv0641  | 41  | 30 | 0,000377876 information pathways                    |
| Rv2035  | 142 | 10 | 0,000378304 conserved hypotheticals                 |
| Rv2010  | 24  | 22 | 0,000379153 virulence, detoxification, adaptation   |
| Rv3873  | 119 | 7  | 0,000405702 PE/PPE                                  |
| Rv2036  | 157 | 12 | 0,0004108 conserved hypotheticals                   |
| Rv3230c | 52  | 34 | 0,000427819 intermediary metabolism and respiration |
| Rv3531c | 65  | 1  | 0,000460912 conserved hypotheticals                 |
| Rv1936  | 67  | 1  | 0,000491803 intermediary metabolism and respiration |
| Rv2651c | 43  | 30 | 0,000543454 insertion seqs and phages               |
| Rv0677c | 83  | 3  | 0,000759561 cell wall and cell processes            |
| Rv3206c | 194 | 19 | 0,001057399 intermediary metabolism and respiration |
| Rv0248c | 71  | 2  | 0,001122219 intermediary metabolism and respiration |
| Rv0282  | 28  | 23 | 0,001160174 cell wall and cell processes            |
| Rv1594  | 72  | 2  | 0,001162402 intermediary metabolism and respiration |

|         |     |    |                                                     |
|---------|-----|----|-----------------------------------------------------|
| Rv3052c | 332 | 43 | 0,001221997 information pathways                    |
| Rv1211  | 38  | 27 | 0,001259433 conserved hypotheticals                 |
| Rv2663  | 59  | 1  | 0,001478357 conserved hypotheticals                 |
| Rv2514c | 60  | 1  | 0,00150592 conserved hypotheticals                  |
| Rv2503c | 69  | 2  | 0,001576255 lipid metabolism                        |
| Rv3054c | 69  | 2  | 0,001576255 conserved hypotheticals                 |
| Rv2744c | 239 | 27 | 0,001644703 conserved hypotheticals                 |
| Rv3526  | 108 | 7  | 0,001942813 intermediary metabolism and respiration |
| Rv2840c | 31  | 23 | 0,002148314 conserved hypotheticals                 |
| Rv0787A | 18  | 17 | 0,002275107 conserved hypotheticals                 |
| Rv1311  | 16  | 16 | 0,002336996 intermediary metabolism and respiration |
| Rv3674c | 100 | 6  | 0,002493295 information pathways                    |
| Rv0634B | 106 | 7  | 0,002641869 information pathways                    |
| Rv0792c | 154 | 14 | 0,002772313 regulatory proteins                     |
| Rv0824c | 113 | 8  | 0,002775234 lipid metabolism                        |
| Rv2919c | 60  | 34 | 0,002908093 regulatory proteins                     |
| Rv0827c | 64  | 2  | 0,003228703 regulatory proteins                     |
| Rv2515c | 73  | 3  | 0,004539114 conserved hypotheticals                 |
| Rv2504c | 54  | 1  | 0,004772463 lipid metabolism                        |
| Rv0708  | 20  | 17 | 0,004951926 information pathways                    |
| Rv2137c | 68  | 36 | 0,005674312 conserved hypotheticals                 |
| Rv0703  | 24  | 19 | 0,006007678 information pathways                    |
| Rv3582c | 182 | 20 | 0,007179321 intermediary metabolism and respiration |
| Rv3503c | 121 | 10 | 0,007227513 intermediary metabolism and respiration |
| Rv3570c | 67  | 3  | 0,008700913 intermediary metabolism and respiration |
| Rv2662  | 68  | 3  | 0,008820613 conserved hypotheticals                 |
| Rv1797  | 15  | 14 | 0,0088322 cell wall and cell processes              |
| Rv0983  | 124 | 11 | 0,0090376 intermediary metabolism and respiration   |
| Rv0982  | 26  | 19 | 0,009043856 regulatory proteins                     |
| Rv3865  | 104 | 8  | 0,009257378 cell wall and cell processes            |
| Rv0076c | 49  | 1  | 0,009659901 cell wall and cell processes            |
| Rv1222  | 231 | 29 | 0,010274047 information pathways                    |
| Rv0984  | 135 | 13 | 0,010847124 intermediary metabolism and respiration |
| Rv0475  | 66  | 34 | 0,010888214 cell wall and cell processes            |

|         |     |    |                                                     |
|---------|-----|----|-----------------------------------------------------|
| Rv2244  | 27  | 19 | 0,011354831 lipid metabolism                        |
| Rv0275c | 66  | 3  | 0,012166756 regulatory proteins                     |
| Rv3648c | 58  | 31 | 0,012643295 virulence, detoxification, adaptation   |
| Rv1073  | 103 | 8  | 0,012699589 conserved hypotheticals                 |
| Rv1173  | 35  | 22 | 0,01298283 intermediary metabolism and respiration  |
| Rv1586c | 47  | 1  | 0,013841678 insertion seqs and phages               |
| Rv3855  | 46  | 1  | 0,013846264 regulatory proteins                     |
| Rv3535c | 73  | 4  | 0,013902236 intermediary metabolism and respiration |
| Rv3854c | 80  | 5  | 0,015087564 intermediary metabolism and respiration |
| Rv1386  | 86  | 6  | 0,015536047 PE/PPE                                  |
| Rv2307D | 35  | 0  | 0,016496766 conserved hypotheticals                 |
| Rv1894c | 64  | 3  | 0,016846484 conserved hypotheticals                 |
| Rv3613c | 17  | 14 | 0,017873468 conserved hypotheticals                 |
| Rv2713  | 15  | 13 | 0,019230463 intermediary metabolism and respiration |
| Rv1297  | 142 | 15 | 0,020111339 information pathways                    |
| Rv2868c | 260 | 36 | 0,020397732 conserved hypotheticals                 |
| Rv2650c | 13  | 12 | 0,020469172 insertion seqs and phages               |
| Rv1405c | 83  | 6  | 0,020663416 intermediary metabolism and respiration |
| Rv0932c | 28  | 19 | 0,021154444 cell wall and cell processes            |
| Rv1643  | 11  | 11 | 0,021221753 information pathways                    |
| Rv2657c | 22  | 16 | 0,023986542 insertion seqs and phages               |
| Rv2987c | 33  | 0  | 0,024201105 intermediary metabolism and respiration |
| Rv0331  | 32  | 0  | 0,024233748 intermediary metabolism and respiration |
| Rv3545c | 52  | 2  | 0,026557112 intermediary metabolism and respiration |
| Rv0970  | 42  | 1  | 0,028048885 cell wall and cell processes            |
| Rv0837c | 43  | 1  | 0,028655396 conserved hypotheticals                 |
| Rv0805  | 23  | 16 | 0,029340472 intermediary metabolism and respiration |
| Rv3456c | 27  | 18 | 0,030901474 information pathways                    |
| Rv0390  | 10  | 10 | 0,033490924 conserved hypotheticals                 |
| Rv1397c | 107 | 10 | 0,034770112 virulence, detoxification, adaptation   |
| Rv0752c | 66  | 4  | 0,034860717 lipid metabolism                        |
| Rv0724  | 21  | 15 | 0,03584719 cell wall and cell processes             |
| Rv1957  | 31  | 0  | 0,036160142 conserved hypotheticals                 |
| Rv0655  | 80  | 6  | 0,03792622 cell wall and cell processes             |

|         |    |     |                                                     |
|---------|----|-----|-----------------------------------------------------|
| Rv2879c | 80 | 6   | 0,03792622 conserved hypotheticals                  |
| Rv0138  | 40 | 1   | 0,040646734 conserved hypotheticals                 |
| Rv0232  | 41 | 1   | 0,041221655 regulatory proteins                     |
| Rv4003  | 22 | 15  | 0,043839573 NA                                      |
| Rv1576c | 13 | 11  | 0,045781551 insertion seqs and phages               |
| Rv2032  | 13 | 11  | 0,045781551 conserved hypotheticals                 |
| Rv2185c | 13 | 11  | 0,045781551 conserved hypotheticals                 |
| Rv2461c | 90 | 8   | 0,047519985 intermediary metabolism and respiration |
| Rv3750c | 77 | 6   | 0,04920403 insertion seqs and phages                |
| Rv3765c | 11 | 10  | 0,049326772 regulatory proteins                     |
| Rv2005c | 4  | 26  | 3,15512E-13 virulence, detoxification, adaptation   |
| Rv2623  | 26 | 80  | 9,0376E-13 virulence, detoxification, adaptation    |
| Rv2031c | 19 | 115 | 9,0376E-13 virulence, detoxification, adaptation    |
| Rv0960  | 4  | 38  | 9,0376E-13 virulence, detoxification, adaptation    |
| Rv3134c | 7  | 24  | 3,19381E-10 virulence, detoxification, adaptation   |
| Rv1996  | 21 | 25  | 6,26801E-06 virulence, detoxification, adaptation   |
| Rv3385c | 15 | 20  | 3,33988E-05 virulence, detoxification, adaptation   |
| Rv1560  | 2  | 7   | 0,005675702 virulence, detoxification, adaptation   |
| Rv2760c | 1  | 6   | 0,006698202 virulence, detoxification, adaptation   |
| Rv3130c | 16 | 37  | 2,07267E-13 lipid metabolism                        |
| Rv2794c | 4  | 12  | 8,32674E-05 lipid metabolism                        |
| Rv0243  | 10 | 16  | 9,86964E-05 lipid metabolism                        |
| Rv2931  | 3  | 6   | 0,041431658 lipid metabolism                        |
| Rv3371  | 3  | 6   | 0,041431658 lipid metabolism                        |
| Rv0701  | 29 | 40  | 1,16256E-10 information pathways                    |
| Rv0710  | 11 | 20  | 2,35603E-06 information pathways                    |
| Rv1317c | 1  | 9   | 0,000108302 information pathways                    |
| Rv0702  | 11 | 15  | 0,000506175 information pathways                    |
| Rv0704  | 11 | 14  | 0,001398827 information pathways                    |
| Rv0570  | 3  | 8   | 0,004241907 information pathways                    |
| Rv0652  | 3  | 6   | 0,041431658 information pathways                    |
| Rv0341  | 5  | 27  | 3,56959E-13 cell wall and cell processes            |
| Rv2091c | 20 | 39  | 5,66988E-13 cell wall and cell processes            |
| Rv3614c | 38 | 57  | 9,0376E-13 cell wall and cell processes             |

|         |    |    |                                                     |
|---------|----|----|-----------------------------------------------------|
| Rv0289  | 31 | 53 | 9,0376E-13 cell wall and cell processes             |
| Rv3615c | 51 | 88 | 9,0376E-13 cell wall and cell processes             |
| Rv3616c | 29 | 92 | 9,0376E-13 cell wall and cell processes             |
| Rv2477c | 15 | 35 | 9,14441E-13 cell wall and cell processes            |
| Rv0287  | 8  | 28 | 4,9482E-12 cell wall and cell processes             |
| Rv2625c | 5  | 16 | 1,44367E-06 cell wall and cell processes            |
| Rv0288  | 9  | 19 | 1,54896E-06 cell wall and cell processes            |
| Rv3236c | 7  | 13 | 0,000334644 cell wall and cell processes            |
| Rv2916c | 7  | 12 | 0,00099619 cell wall and cell processes             |
| Rv2376c | 1  | 7  | 0,001701708 cell wall and cell processes            |
| Rv2846c | 14 | 15 | 0,002333917 cell wall and cell processes            |
| Rv1690  | 2  | 7  | 0,005675702 cell wall and cell processes            |
| Rv1779c | 4  | 8  | 0,009501538 cell wall and cell processes            |
| Rv1733c | 6  | 9  | 0,012238665 cell wall and cell processes            |
| Rv2586c | 2  | 6  | 0,018878542 cell wall and cell processes            |
| Rv1184c | 1  | 5  | 0,023986542 cell wall and cell processes            |
| Rv0103c | 4  | 7  | 0,02751681 cell wall and cell processes             |
| Rv0290  | 3  | 6  | 0,041431658 cell wall and cell processes            |
| Rv1572c | 0  | 4  | 0,02418585 insertion seqs and phages                |
| Rv3477  | 24 | 70 | 9,0376E-13 PE/PPE                                   |
| Rv3478  | 4  | 30 | 9,0376E-13 PE/PPE                                   |
| Rv2430c | 14 | 30 | 1,73331E-10 PE/PPE                                  |
| Rv2431c | 15 | 28 | 4,55988E-09 PE/PPE                                  |
| Rv0280  | 8  | 13 | 0,00064293 PE/PPE                                   |
| Rv0285  | 1  | 7  | 0,001701708 PE/PPE                                  |
| Rv2396  | 9  | 12 | 0,00325427 PE/PPE                                   |
| Rv0286  | 3  | 7  | 0,013662475 PE/PPE                                  |
| Rv1789  | 6  | 8  | 0,03216829 PE/PPE                                   |
| Rv0211  | 24 | 44 | 4,0268E-14 intermediary metabolism and respiration  |
| Rv2007c | 40 | 87 | 9,0376E-13 intermediary metabolism and respiration  |
| Rv2697c | 22 | 53 | 9,0376E-13 intermediary metabolism and respiration  |
| Rv1848  | 4  | 35 | 9,0376E-13 intermediary metabolism and respiration  |
| Rv3001c | 13 | 32 | 5,68174E-12 intermediary metabolism and respiration |
| Rv0467  | 21 | 32 | 3,87746E-09 intermediary metabolism and respiration |

|         |    |     |             |                                         |
|---------|----|-----|-------------|-----------------------------------------|
| Rv0510  | 10 | 19  | 3,42815E-06 | intermediary metabolism and respiration |
| Rv2995c | 5  | 13  | 6,54265E-05 | intermediary metabolism and respiration |
| Rv2584c | 13 | 18  | 0,000080142 | intermediary metabolism and respiration |
| Rv1652  | 4  | 12  | 8,32674E-05 | intermediary metabolism and respiration |
| Rv3341  | 3  | 11  | 0,000101526 | intermediary metabolism and respiration |
| Rv3342  | 3  | 10  | 0,000373143 | intermediary metabolism and respiration |
| Rv1324  | 9  | 14  | 0,000427055 | intermediary metabolism and respiration |
| Rv1284  | 2  | 8   | 0,001589202 | intermediary metabolism and respiration |
| Rv1465  | 5  | 10  | 0,00209508  | intermediary metabolism and respiration |
| Rv1133c | 6  | 9   | 0,012238665 | intermediary metabolism and respiration |
| Rv3002c | 10 | 11  | 0,013925552 | intermediary metabolism and respiration |
| Rv2996c | 2  | 6   | 0,018878542 | intermediary metabolism and respiration |
| Rv3704c | 2  | 6   | 0,018878542 | intermediary metabolism and respiration |
| Rv0939  | 4  | 7   | 0,02751681  | intermediary metabolism and respiration |
| Rv3133c | 5  | 13  | 6,54265E-05 | regulatory proteins                     |
| Rv2718c | 7  | 12  | 0,00099619  | regulatory proteins                     |
| Rv3416  | 11 | 12  | 0,009134623 | regulatory proteins                     |
| Rv0081  | 10 | 11  | 0,013925552 | regulatory proteins                     |
| Rv1738  | 88 | 101 | 9,0376E-13  | conserved hypotheticals                 |
| Rv1535  | 64 | 81  | 9,0376E-13  | conserved hypotheticals                 |
| Rv1989c | 51 | 66  | 9,0376E-13  | conserved hypotheticals                 |
| Rv2696c | 60 | 82  | 9,0376E-13  | conserved hypotheticals                 |
| Rv1065  | 30 | 72  | 9,0376E-13  | conserved hypotheticals                 |
| Rv0569  | 14 | 43  | 9,0376E-13  | conserved hypotheticals                 |
| Rv3131  | 13 | 52  | 9,0376E-13  | conserved hypotheticals                 |
| Rv1066  | 10 | 41  | 9,0376E-13  | conserved hypotheticals                 |
| Rv2626c | 9  | 42  | 9,0376E-13  | conserved hypotheticals                 |
| Rv2030c | 4  | 21  | 3,875E-10   | conserved hypotheticals                 |
| Rv0080  | 2  | 18  | 1,19006E-09 | conserved hypotheticals                 |
| Rv2629  | 32 | 36  | 4,15964E-08 | conserved hypotheticals                 |
| Rv3686c | 6  | 18  | 3,25463E-07 | conserved hypotheticals                 |
| Rv0079  | 10 | 21  | 3,37072E-07 | conserved hypotheticals                 |
| Rv0628c | 10 | 20  | 1,09864E-06 | conserved hypotheticals                 |
| Rv2627c | 7  | 17  | 2,9573E-06  | conserved hypotheticals                 |

|         |     |     |                                                   |
|---------|-----|-----|---------------------------------------------------|
| Rv3207c | 5   | 15  | 5,20644E-06 conserved hypotheticals               |
| Rv1194c | 7   | 16  | 1,00921E-05 conserved hypotheticals               |
| Rv2628  | 15  | 21  | 1,17721E-05 conserved hypotheticals               |
| Rv1466  | 17  | 21  | 0,000037544 conserved hypotheticals               |
| Rv2777c | 17  | 18  | 0,000621583 conserved hypotheticals               |
| Rv1078  | 2   | 8   | 0,001589202 conserved hypotheticals               |
| Rv1847  | 2   | 8   | 0,001589202 conserved hypotheticals               |
| Rv3127  | 9   | 12  | 0,00325427 conserved hypotheticals                |
| Rv1887  | 7   | 10  | 0,008052106 conserved hypotheticals               |
| Rv3612c | 10  | 11  | 0,013925552 conserved hypotheticals               |
| Rv3208A | 2   | 6   | 0,018878542 conserved hypotheticals               |
| Rv2661c | 0   | 5   | 0,005982821 conserved hypotheticals               |
| Rv2865  | 39  | 1   | 0,060356 virulence, detoxification, adaptation    |
| Rv0609  | 81  | 7   | 0,062349993 virulence, detoxification, adaptation |
| Rv3384c | 8   | 7   | 0,174733036 virulence, detoxification, adaptation |
| Rv1741  | 39  | 2   | 0,180594863 virulence, detoxification, adaptation |
| Rv3417c | 37  | 18  | 0,186147248 virulence, detoxification, adaptation |
| Rv0660c | 16  | 10  | 0,238137275 virulence, detoxification, adaptation |
| Rv1959c | 56  | 5   | 0,240048283 virulence, detoxification, adaptation |
| Rv2830c | 37  | 2   | 0,244720907 virulence, detoxification, adaptation |
| Rv3372  | 1   | 3   | 0,257111256 virulence, detoxification, adaptation |
| Rv3418c | 544 | 159 | 0,291978215 virulence, detoxification, adaptation |
| Rv3171c | 10  | 7   | 0,300911 virulence, detoxification, adaptation    |
| Rv2063  | 0   | 2   | 0,334966855 virulence, detoxification, adaptation |
| Rv2104c | 39  | 3   | 0,403390782 virulence, detoxification, adaptation |
| Rv2521  | 9   | 6   | 0,411415431 virulence, detoxification, adaptation |
| Rv2374c | 40  | 3   | 0,412430159 virulence, detoxification, adaptation |
| Rv0550c | 4   | 4   | 0,413484436 virulence, detoxification, adaptation |
| Rv3846  | 4   | 4   | 0,413484436 virulence, detoxification, adaptation |
| Rv0384c | 146 | 23  | 0,481158011 virulence, detoxification, adaptation |
| Rv1908c | 51  | 20  | 0,512629046 virulence, detoxification, adaptation |
| Rv3922c | 17  | 9   | 0,545146551 virulence, detoxification, adaptation |
| Rv0749  | 5   | 4   | 0,552732111 virulence, detoxification, adaptation |
| Rv0608  | 130 | 21  | 0,601876855 virulence, detoxification, adaptation |



|         |    |   |                                                   |
|---------|----|---|---------------------------------------------------|
| Rv1960c | 20 | 1 | 0,616502504 virulence, detoxification, adaptation |
| Rv1694  | 3  | 3 | 0,62647 virulence, detoxification, adaptation     |
| Rv2595  | 3  | 3 | 0,62647 virulence, detoxification, adaptation     |
| Rv0168  | 1  | 2 | 0,643390112 virulence, detoxification, adaptation |
| Rv1720c | 1  | 2 | 0,643390112 virulence, detoxification, adaptation |
| Rv2373c | 65 | 9 | 0,768469867 virulence, detoxification, adaptation |
| Rv2550c | 33 | 3 | 0,782530909 virulence, detoxification, adaptation |
| Rv2624c | 8  | 5 | 0,81076095 virulence, detoxification, adaptation  |
| Rv3269  | 18 | 1 | 0,816741656 virulence, detoxification, adaptation |
| Rv0587  | 59 | 8 | 0,862520569 virulence, detoxification, adaptation |
| Rv0595c | 0  | 1 | 0,891983427 virulence, detoxification, adaptation |
| Rv1563c | 0  | 1 | 0,891983427 virulence, detoxification, adaptation |
| Rv2006  | 0  | 1 | 0,891983427 virulence, detoxification, adaptation |
| Rv2872  | 0  | 1 | 0,891983427 virulence, detoxification, adaptation |
| Rv3757c | 0  | 1 | 0,891983427 virulence, detoxification, adaptation |
| Rv0664  | 2  | 2 | 0,902076825 virulence, detoxification, adaptation |
| Rv2759c | 2  | 2 | 0,902076825 virulence, detoxification, adaptation |
| Rv0623  | 11 | 5 | 0,915485005 virulence, detoxification, adaptation |
| Rv3490  | 11 | 5 | 0,915485005 virulence, detoxification, adaptation |
| Rv2548  | 9  | 0 | 0,932297131 virulence, detoxification, adaptation |
| Rv1962c | 10 | 0 | 0,942423529 virulence, detoxification, adaptation |
| Rv0871  | 12 | 5 | 0,948020735 virulence, detoxification, adaptation |
| Rv1965  | 7  | 0 | 0,965258939 virulence, detoxification, adaptation |
| Rv2866  | 7  | 0 | 0,965258939 virulence, detoxification, adaptation |
| Rv2527  | 8  | 0 | 0,980645136 virulence, detoxification, adaptation |
| Rv3082c | 8  | 0 | 0,980645136 virulence, detoxification, adaptation |
| Rv2190c | 3  | 2 | 1,017645149 virulence, detoxification, adaptation |
| Rv1991c | 6  | 3 | 1,023060102 virulence, detoxification, adaptation |
| Rv2829c | 6  | 3 | 1,023060102 virulence, detoxification, adaptation |
| Rv2549c | 12 | 1 | 1,031469845 virulence, detoxification, adaptation |
| Rv2602  | 12 | 1 | 1,031469845 virulence, detoxification, adaptation |
| Rv3176c | 12 | 1 | 1,031469845 virulence, detoxification, adaptation |
| Rv0582  | 11 | 1 | 1,032354536 virulence, detoxification, adaptation |
| Rv2299c | 11 | 1 | 1,032354536 virulence, detoxification, adaptation |

|         |    |    |                                                   |
|---------|----|----|---------------------------------------------------|
| Rv3168  | 11 | 1  | 1,032354536 virulence, detoxification, adaptation |
| Rv0588  | 57 | 9  | 1,039743796 virulence, detoxification, adaptation |
| Rv0300  | 47 | 8  | 1,044768898 virulence, detoxification, adaptation |
| Rv2601A | 27 | 4  | 1,045653566 virulence, detoxification, adaptation |
| Rv0657c | 7  | 3  | 1,073553923 virulence, detoxification, adaptation |
| Rv0134  | 17 | 6  | 1,079485504 virulence, detoxification, adaptation |
| Rv0659c | 47 | 14 | 1,07984106 virulence, detoxification, adaptation  |
| Rv0626  | 16 | 5  | 1,082039404 virulence, detoxification, adaptation |
| Rv1082  | 9  | 4  | 1,090043564 virulence, detoxification, adaptation |
| Rv1102c | 5  | 0  | 1,093861497 virulence, detoxification, adaptation |
| Rv1114  | 5  | 0  | 1,093861497 virulence, detoxification, adaptation |
| Rv1838c | 6  | 0  | 1,107198572 virulence, detoxification, adaptation |
| Rv1964  | 6  | 0  | 1,107198572 virulence, detoxification, adaptation |
| Rv1938  | 15 | 1  | 1,126699026 virulence, detoxification, adaptation |
| Rv1952  | 15 | 1  | 1,126699026 virulence, detoxification, adaptation |
| Rv0262c | 5  | 2  | 1,132270883 virulence, detoxification, adaptation |
| Rv0665  | 5  | 2  | 1,132270883 virulence, detoxification, adaptation |
| Rv0589  | 22 | 3  | 1,142844091 virulence, detoxification, adaptation |
| Rv1636  | 15 | 2  | 1,146799395 virulence, detoxification, adaptation |
| Rv1982c | 17 | 2  | 1,149582391 virulence, detoxification, adaptation |
| Rv0167  | 6  | 2  | 1,154704835 virulence, detoxification, adaptation |
| Rv1942c | 6  | 2  | 1,154704835 virulence, detoxification, adaptation |
| Rv0169  | 1  | 1  | 1,155519357 virulence, detoxification, adaptation |
| Rv0554  | 1  | 1  | 1,155519357 virulence, detoxification, adaptation |
| Rv0798c | 1  | 1  | 1,155519357 virulence, detoxification, adaptation |
| Rv1026  | 1  | 1  | 1,155519357 virulence, detoxification, adaptation |
| Rv1124  | 1  | 1  | 1,155519357 virulence, detoxification, adaptation |
| Rv1562c | 1  | 1  | 1,155519357 virulence, detoxification, adaptation |
| Rv1932  | 1  | 1  | 1,155519357 virulence, detoxification, adaptation |
| Rv2028c | 1  | 1  | 1,155519357 virulence, detoxification, adaptation |
| Rv2416c | 1  | 1  | 1,155519357 virulence, detoxification, adaptation |
| Rv2429  | 1  | 1  | 1,155519357 virulence, detoxification, adaptation |
| Rv2871  | 1  | 1  | 1,155519357 virulence, detoxification, adaptation |
| Rv3498c | 1  | 1  | 1,155519357 virulence, detoxification, adaptation |

|         |    |   |                                                   |
|---------|----|---|---------------------------------------------------|
| Rv3670  | 1  | 1 | 1,155519357 virulence, detoxification, adaptation |
| Rv3758c | 1  | 1 | 1,155519357 virulence, detoxification, adaptation |
| Rv1103c | 15 | 5 | 1,167008184 virulence, detoxification, adaptation |
| Rv0301  | 21 | 7 | 1,168514286 virulence, detoxification, adaptation |
| Rv0634c | 9  | 1 | 1,171820425 virulence, detoxification, adaptation |
| Rv0239  | 32 | 6 | 1,174939457 virulence, detoxification, adaptation |
| Rv0171  | 2  | 1 | 1,177742083 virulence, detoxification, adaptation |
| Rv0591  | 2  | 1 | 1,177742083 virulence, detoxification, adaptation |
| Rv1085c | 2  | 1 | 1,177742083 virulence, detoxification, adaptation |
| Rv1123c | 2  | 1 | 1,177742083 virulence, detoxification, adaptation |
| Rv1564c | 2  | 1 | 1,177742083 virulence, detoxification, adaptation |
| Rv2428  | 2  | 1 | 1,177742083 virulence, detoxification, adaptation |
| Rv2740  | 2  | 1 | 1,177742083 virulence, detoxification, adaptation |
| Rv3499c | 2  | 1 | 1,177742083 virulence, detoxification, adaptation |
| Rv3756c | 2  | 1 | 1,177742083 virulence, detoxification, adaptation |
| Rv1721c | 7  | 2 | 1,179167167 virulence, detoxification, adaptation |
| Rv2526  | 7  | 2 | 1,179167167 virulence, detoxification, adaptation |
| Rv0592  | 3  | 1 | 1,180692338 virulence, detoxification, adaptation |
| Rv0594  | 3  | 1 | 1,180692338 virulence, detoxification, adaptation |
| Rv0598c | 3  | 1 | 1,180692338 virulence, detoxification, adaptation |
| Rv1477  | 3  | 1 | 1,180692338 virulence, detoxification, adaptation |
| Rv1966  | 3  | 1 | 1,180692338 virulence, detoxification, adaptation |
| Rv2026c | 3  | 1 | 1,180692338 virulence, detoxification, adaptation |
| Rv2214c | 3  | 1 | 1,180692338 virulence, detoxification, adaptation |
| Rv3500c | 3  | 1 | 1,180692338 virulence, detoxification, adaptation |
| Rv3660c | 3  | 1 | 1,180692338 virulence, detoxification, adaptation |
| Rv3661  | 3  | 1 | 1,180692338 virulence, detoxification, adaptation |
| Rv0170  | 4  | 2 | 1,186675548 virulence, detoxification, adaptation |
| Rv0174  | 4  | 2 | 1,186675548 virulence, detoxification, adaptation |
| Rv0432  | 4  | 2 | 1,186675548 virulence, detoxification, adaptation |
| Rv1113  | 4  | 2 | 1,186675548 virulence, detoxification, adaptation |
| Rv1943c | 4  | 2 | 1,186675548 virulence, detoxification, adaptation |
| Rv3100c | 4  | 2 | 1,186675548 virulence, detoxification, adaptation |
| Rv0627  | 10 | 3 | 1,188374024 virulence, detoxification, adaptation |

|         |    |   |             |                                       |
|---------|----|---|-------------|---------------------------------------|
| Rv2103c | 10 | 3 | 1,188374024 | virulence, detoxification, adaptation |
| Rv0617  | 14 | 2 | 1,213683268 | virulence, detoxification, adaptation |
| Rv1740  | 15 | 4 | 1,243303357 | virulence, detoxification, adaptation |
| Rv0240  | 8  | 1 | 1,56554878  | virulence, detoxification, adaptation |
| Rv0590A | 8  | 1 | 1,56554878  | virulence, detoxification, adaptation |
| Rv0599c | 8  | 1 | 1,56554878  | virulence, detoxification, adaptation |
| Rv1242  | 8  | 1 | 1,56554878  | virulence, detoxification, adaptation |
| Rv1953  | 8  | 1 | 1,56554878  | virulence, detoxification, adaptation |
| Rv0126  | 7  | 1 | 1,56554878  | virulence, detoxification, adaptation |
| Rv1247c | 7  | 1 | 1,56554878  | virulence, detoxification, adaptation |
| Rv3697c | 7  | 1 | 1,56554878  | virulence, detoxification, adaptation |
| Rv0127  | 6  | 1 | 1,56554878  | virulence, detoxification, adaptation |
| Rv0549c | 6  | 1 | 1,56554878  | virulence, detoxification, adaptation |
| Rv0590  | 11 | 2 | 1,56554878  | virulence, detoxification, adaptation |
| Rv0065  | 10 | 2 | 1,56554878  | virulence, detoxification, adaptation |
| Rv0596c | 5  | 1 | 1,56554878  | virulence, detoxification, adaptation |
| Rv0656c | 5  | 1 | 1,56554878  | virulence, detoxification, adaptation |
| Rv0748  | 5  | 1 | 1,56554878  | virulence, detoxification, adaptation |
| Rv1839c | 10 | 2 | 1,56554878  | virulence, detoxification, adaptation |
| Rv2238c | 5  | 1 | 1,56554878  | virulence, detoxification, adaptation |
| Rv3357  | 5  | 1 | 1,56554878  | virulence, detoxification, adaptation |
| Rv3617  | 5  | 1 | 1,56554878  | virulence, detoxification, adaptation |
| Rv2009  | 29 | 6 | 1,56554878  | virulence, detoxification, adaptation |
| Rv2530A | 29 | 6 | 1,56554878  | virulence, detoxification, adaptation |
| Rv0277c | 23 | 5 | 1,56554878  | virulence, detoxification, adaptation |
| Rv0581  | 18 | 4 | 1,56554878  | virulence, detoxification, adaptation |
| Rv0624  | 17 | 4 | 1,56554878  | virulence, detoxification, adaptation |
| Rv0172  | 4  | 1 | 1,56554878  | virulence, detoxification, adaptation |
| Rv1241  | 12 | 3 | 1,56554878  | virulence, detoxification, adaptation |
| Rv1901  | 4  | 1 | 1,56554878  | virulence, detoxification, adaptation |
| Rv2142c | 12 | 3 | 1,56554878  | virulence, detoxification, adaptation |
| Rv3759c | 4  | 1 | 1,56554878  | virulence, detoxification, adaptation |
| Rv0024  | 4  | 0 | 1,56554878  | virulence, detoxification, adaptation |
| Rv0456A | 1  | 0 | 1,56554878  | virulence, detoxification, adaptation |

|         |   |   |                                                  |
|---------|---|---|--------------------------------------------------|
| Rv0661c | 0 | 0 | 1,56554878 virulence, detoxification, adaptation |
| Rv0662c | 0 | 0 | 1,56554878 virulence, detoxification, adaptation |
| Rv1246c | 2 | 0 | 1,56554878 virulence, detoxification, adaptation |
| Rv1478  | 3 | 0 | 1,56554878 virulence, detoxification, adaptation |
| Rv1494  | 4 | 0 | 1,56554878 virulence, detoxification, adaptation |
| Rv1495  | 1 | 0 | 1,56554878 virulence, detoxification, adaptation |
| Rv1561  | 4 | 0 | 1,56554878 virulence, detoxification, adaptation |
| Rv1566c | 2 | 0 | 1,56554878 virulence, detoxification, adaptation |
| Rv1608c | 2 | 0 | 1,56554878 virulence, detoxification, adaptation |
| Rv1967  | 1 | 0 | 1,56554878 virulence, detoxification, adaptation |
| Rv1968  | 1 | 0 | 1,56554878 virulence, detoxification, adaptation |
| Rv1969  | 0 | 0 | 1,56554878 virulence, detoxification, adaptation |
| Rv1971  | 2 | 0 | 1,56554878 virulence, detoxification, adaptation |
| Rv2274c | 2 | 0 | 1,56554878 virulence, detoxification, adaptation |
| Rv2303c | 2 | 0 | 1,56554878 virulence, detoxification, adaptation |
| Rv2319c | 1 | 0 | 1,56554878 virulence, detoxification, adaptation |
| Rv2493  | 2 | 0 | 1,56554878 virulence, detoxification, adaptation |
| Rv2494  | 2 | 0 | 1,56554878 virulence, detoxification, adaptation |
| Rv2530c | 1 | 0 | 1,56554878 virulence, detoxification, adaptation |
| Rv2545  | 1 | 0 | 1,56554878 virulence, detoxification, adaptation |
| Rv2546  | 0 | 0 | 1,56554878 virulence, detoxification, adaptation |
| Rv2547  | 3 | 0 | 1,56554878 virulence, detoxification, adaptation |
| Rv2581c | 4 | 0 | 1,56554878 virulence, detoxification, adaptation |
| Rv2596  | 4 | 0 | 1,56554878 virulence, detoxification, adaptation |
| Rv2757c | 2 | 0 | 1,56554878 virulence, detoxification, adaptation |
| Rv2758c | 3 | 0 | 1,56554878 virulence, detoxification, adaptation |
| Rv2801c | 1 | 0 | 1,56554878 virulence, detoxification, adaptation |
| Rv2863  | 0 | 0 | 1,56554878 virulence, detoxification, adaptation |
| Rv3063  | 4 | 0 | 1,56554878 virulence, detoxification, adaptation |
| Rv3177  | 2 | 0 | 1,56554878 virulence, detoxification, adaptation |
| Rv3320c | 3 | 0 | 1,56554878 virulence, detoxification, adaptation |
| Rv3321c | 3 | 0 | 1,56554878 virulence, detoxification, adaptation |
| Rv3358  | 2 | 0 | 1,56554878 virulence, detoxification, adaptation |
| Rv3473c | 0 | 0 | 1,56554878 virulence, detoxification, adaptation |

|         |    |    |                                                  |
|---------|----|----|--------------------------------------------------|
| Rv3494c | 1  | 0  | 1,56554878 virulence, detoxification, adaptation |
| Rv3496c | 1  | 0  | 1,56554878 virulence, detoxification, adaptation |
| Rv3497c | 1  | 0  | 1,56554878 virulence, detoxification, adaptation |
| Rv3501c | 4  | 0  | 1,56554878 virulence, detoxification, adaptation |
| Rv3061c | 55 | 3  | 0,058818431 lipid metabolism                     |
| Rv0281  | 14 | 11 | 0,062137091 lipid metabolism                     |
| Rv3800c | 12 | 10 | 0,068692536 lipid metabolism                     |
| Rv1180  | 1  | 4  | 0,080382111 lipid metabolism                     |
| Rv2500c | 41 | 21 | 0,080799473 lipid metabolism                     |
| Rv3825c | 7  | 7  | 0,120728181 lipid metabolism                     |
| Rv1627c | 15 | 10 | 0,200643368 lipid metabolism                     |
| Rv0468  | 11 | 8  | 0,209271414 lipid metabolism                     |
| Rv1663  | 16 | 10 | 0,238137275 lipid metabolism                     |
| Rv3373  | 1  | 3  | 0,257111256 lipid metabolism                     |
| Rv3515c | 27 | 1  | 0,286143448 lipid metabolism                     |
| Rv0533c | 3  | 4  | 0,292939524 lipid metabolism                     |
| Rv1484  | 3  | 4  | 0,292939524 lipid metabolism                     |
| Rv2948c | 3  | 4  | 0,292939524 lipid metabolism                     |
| Rv2523c | 0  | 2  | 0,334966855 lipid metabolism                     |
| Rv3374  | 0  | 2  | 0,334966855 lipid metabolism                     |
| Rv0088  | 12 | 8  | 0,346184583 lipid metabolism                     |
| Rv1472  | 41 | 18 | 0,380508687 lipid metabolism                     |
| Rv0643c | 6  | 5  | 0,380970124 lipid metabolism                     |
| Rv2247  | 6  | 5  | 0,380970124 lipid metabolism                     |
| Rv2947c | 6  | 5  | 0,380970124 lipid metabolism                     |
| Rv1760  | 13 | 8  | 0,391253871 lipid metabolism                     |
| Rv3799c | 9  | 6  | 0,411415431 lipid metabolism                     |
| Rv1662  | 4  | 4  | 0,413484436 lipid metabolism                     |
| Rv1074c | 7  | 5  | 0,485900548 lipid metabolism                     |
| Rv3767c | 7  | 5  | 0,485900548 lipid metabolism                     |
| Rv3504  | 37 | 3  | 0,504468227 lipid metabolism                     |
| Rv1344  | 5  | 4  | 0,552732111 lipid metabolism                     |
| Rv3513c | 20 | 1  | 0,616502504 lipid metabolism                     |
| Rv2612c | 3  | 3  | 0,62647 lipid metabolism                         |

|         |    |    |                              |
|---------|----|----|------------------------------|
| Rv1185c | 1  | 2  | 0,643390112 lipid metabolism |
| Rv3281  | 1  | 2  | 0,643390112 lipid metabolism |
| Rv3540c | 1  | 2  | 0,643390112 lipid metabolism |
| Rv3804c | 16 | 8  | 0,668784724 lipid metabolism |
| Rv1094  | 39 | 15 | 0,707038873 lipid metabolism |
| Rv3221c | 67 | 23 | 0,777410359 lipid metabolism |
| Rv3546  | 23 | 2  | 0,879736108 lipid metabolism |
| Rv2245  | 26 | 10 | 0,880895119 lipid metabolism |
| Rv2246  | 10 | 5  | 0,886611927 lipid metabolism |
| Rv0860  | 24 | 10 | 0,886858514 lipid metabolism |
| Rv2483c | 5  | 3  | 0,890066667 lipid metabolism |
| Rv3480c | 5  | 3  | 0,890066667 lipid metabolism |
| Rv1135A | 0  | 1  | 0,891983427 lipid metabolism |
| Rv1182  | 0  | 1  | 0,891983427 lipid metabolism |
| Rv1679  | 0  | 1  | 0,891983427 lipid metabolism |
| Rv2385  | 0  | 1  | 0,891983427 lipid metabolism |
| Rv2831  | 0  | 1  | 0,891983427 lipid metabolism |
| Rv3791  | 0  | 1  | 0,891983427 lipid metabolism |
| Rv0154c | 2  | 2  | 0,902076825 lipid metabolism |
| Rv0230c | 2  | 2  | 0,902076825 lipid metabolism |
| Rv1193  | 2  | 2  | 0,902076825 lipid metabolism |
| Rv2679  | 2  | 2  | 0,902076825 lipid metabolism |
| Rv2789c | 2  | 2  | 0,902076825 lipid metabolism |
| Rv2939  | 2  | 2  | 0,902076825 lipid metabolism |
| Rv2982c | 2  | 2  | 0,902076825 lipid metabolism |
| Rv2613c | 9  | 0  | 0,932297131 lipid metabolism |
| Rv3516  | 10 | 0  | 0,942423529 lipid metabolism |
| Rv0270  | 12 | 5  | 0,948020735 lipid metabolism |
| Rv0726c | 7  | 0  | 0,965258939 lipid metabolism |
| Rv0099  | 3  | 2  | 1,017645149 lipid metabolism |
| Rv0905  | 3  | 2  | 1,017645149 lipid metabolism |
| Rv1544  | 3  | 2  | 1,017645149 lipid metabolism |
| Rv1618  | 3  | 2  | 1,017645149 lipid metabolism |
| Rv3761c | 3  | 2  | 1,017645149 lipid metabolism |

|         |    |    |                              |
|---------|----|----|------------------------------|
| Rv3824c | 3  | 2  | 1,017645149 lipid metabolism |
| Rv0642c | 6  | 3  | 1,023060102 lipid metabolism |
| Rv3720  | 6  | 3  | 1,023060102 lipid metabolism |
| Rv0145  | 27 | 9  | 1,029064322 lipid metabolism |
| Rv0830  | 12 | 1  | 1,031469845 lipid metabolism |
| Rv1527c | 11 | 1  | 1,032354536 lipid metabolism |
| Rv3505  | 18 | 2  | 1,036154677 lipid metabolism |
| Rv0045c | 13 | 1  | 1,045711168 lipid metabolism |
| Rv3229c | 67 | 21 | 1,052604914 lipid metabolism |
| Rv1483  | 7  | 3  | 1,073553923 lipid metabolism |
| Rv2935  | 11 | 4  | 1,075323219 lipid metabolism |
| Rv3734c | 9  | 4  | 1,090043564 lipid metabolism |
| Rv3233c | 5  | 0  | 1,093861497 lipid metabolism |
| Rv2386c | 6  | 0  | 1,107198572 lipid metabolism |
| Rv3740c | 6  | 0  | 1,107198572 lipid metabolism |
| Rv3140  | 19 | 6  | 1,108162472 lipid metabolism |
| Rv0469  | 20 | 6  | 1,121612319 lipid metabolism |
| Rv2724c | 5  | 2  | 1,132270883 lipid metabolism |
| Rv3141  | 5  | 2  | 1,132270883 lipid metabolism |
| Rv1323  | 25 | 7  | 1,132838175 lipid metabolism |
| Rv3544c | 23 | 3  | 1,132864773 lipid metabolism |
| Rv2940c | 35 | 11 | 1,142451131 lipid metabolism |
| Rv3383c | 22 | 3  | 1,142844091 lipid metabolism |
| Rv3801c | 24 | 7  | 1,143516538 lipid metabolism |
| Rv0146  | 8  | 3  | 1,143564814 lipid metabolism |
| Rv2605c | 8  | 3  | 1,143564814 lipid metabolism |
| Rv0242c | 6  | 2  | 1,154704835 lipid metabolism |
| Rv1425  | 6  | 2  | 1,154704835 lipid metabolism |
| Rv1886c | 6  | 2  | 1,154704835 lipid metabolism |
| Rv2484c | 6  | 2  | 1,154704835 lipid metabolism |
| Rv3285  | 6  | 2  | 1,154704835 lipid metabolism |
| Rv0101  | 1  | 1  | 1,155519357 lipid metabolism |
| Rv0131c | 1  | 1  | 1,155519357 lipid metabolism |
| Rv0437c | 1  | 1  | 1,155519357 lipid metabolism |



|         |    |   |                              |
|---------|----|---|------------------------------|
| Rv0447c | 1  | 1 | 1,155519357 lipid metabolism |
| Rv0904c | 1  | 1 | 1,155519357 lipid metabolism |
| Rv0973c | 1  | 1 | 1,155519357 lipid metabolism |
| Rv1058  | 1  | 1 | 1,155519357 lipid metabolism |
| Rv1136  | 1  | 1 | 1,155519357 lipid metabolism |
| Rv1181  | 1  | 1 | 1,155519357 lipid metabolism |
| Rv1933c | 1  | 1 | 1,155519357 lipid metabolism |
| Rv2261c | 1  | 1 | 1,155519357 lipid metabolism |
| Rv2262c | 1  | 1 | 1,155519357 lipid metabolism |
| Rv2380c | 1  | 1 | 1,155519357 lipid metabolism |
| Rv2383c | 1  | 1 | 1,155519357 lipid metabolism |
| Rv2610c | 1  | 1 | 1,155519357 lipid metabolism |
| Rv2611c | 1  | 1 | 1,155519357 lipid metabolism |
| Rv2932  | 1  | 1 | 1,155519357 lipid metabolism |
| Rv2933  | 1  | 1 | 1,155519357 lipid metabolism |
| Rv3107c | 1  | 1 | 1,155519357 lipid metabolism |
| Rv2930  | 19 | 7 | 1,16839331 lipid metabolism  |
| Rv2941  | 19 | 7 | 1,16839331 lipid metabolism  |
| Rv0557  | 9  | 3 | 1,175481928 lipid metabolism |
| Rv0098  | 2  | 1 | 1,177742083 lipid metabolism |
| Rv0436c | 2  | 1 | 1,177742083 lipid metabolism |
| Rv0564c | 2  | 1 | 1,177742083 lipid metabolism |
| Rv0852  | 2  | 1 | 1,177742083 lipid metabolism |
| Rv0975c | 2  | 1 | 1,177742083 lipid metabolism |
| Rv1141c | 2  | 1 | 1,177742083 lipid metabolism |
| Rv1153c | 2  | 1 | 1,177742083 lipid metabolism |
| Rv1345  | 2  | 1 | 1,177742083 lipid metabolism |
| Rv1350  | 2  | 1 | 1,177742083 lipid metabolism |
| Rv1521  | 2  | 1 | 1,177742083 lipid metabolism |
| Rv1661  | 2  | 1 | 1,177742083 lipid metabolism |
| Rv1683  | 2  | 1 | 1,177742083 lipid metabolism |
| Rv2188c | 2  | 1 | 1,177742083 lipid metabolism |
| Rv2252  | 2  | 1 | 1,177742083 lipid metabolism |
| Rv2289  | 2  | 1 | 1,177742083 lipid metabolism |

|         |    |   |                              |
|---------|----|---|------------------------------|
| Rv2881c | 2  | 1 | 1,177742083 lipid metabolism |
| Rv2928  | 2  | 1 | 1,177742083 lipid metabolism |
| Rv2946c | 2  | 1 | 1,177742083 lipid metabolism |
| Rv3087  | 2  | 1 | 1,177742083 lipid metabolism |
| Rv3391  | 2  | 1 | 1,177742083 lipid metabolism |
| Rv3399  | 2  | 1 | 1,177742083 lipid metabolism |
| Rv1664  | 7  | 2 | 1,179167167 lipid metabolism |
| Rv3573c | 7  | 2 | 1,179167167 lipid metabolism |
| Rv0166  | 3  | 1 | 1,180692338 lipid metabolism |
| Rv0215c | 3  | 1 | 1,180692338 lipid metabolism |
| Rv0221  | 3  | 1 | 1,180692338 lipid metabolism |
| Rv0222  | 3  | 1 | 1,180692338 lipid metabolism |
| Rv0551c | 3  | 1 | 1,180692338 lipid metabolism |
| Rv0675  | 3  | 1 | 1,180692338 lipid metabolism |
| Rv1206  | 3  | 1 | 1,180692338 lipid metabolism |
| Rv1467c | 3  | 1 | 1,180692338 lipid metabolism |
| Rv1543  | 3  | 1 | 1,180692338 lipid metabolism |
| Rv3280  | 3  | 1 | 1,180692338 lipid metabolism |
| Rv3409c | 3  | 1 | 1,180692338 lipid metabolism |
| Rv3667  | 3  | 1 | 1,180692338 lipid metabolism |
| Rv1660  | 4  | 2 | 1,186675548 lipid metabolism |
| Rv2048c | 10 | 3 | 1,188374024 lipid metabolism |
| Rv2243  | 10 | 3 | 1,188374024 lipid metabolism |
| Rv3274c | 13 | 2 | 1,215391325 lipid metabolism |
| Rv0859  | 13 | 4 | 1,218883666 lipid metabolism |
| Rv3139  | 14 | 4 | 1,228707776 lipid metabolism |
| Rv2501c | 19 | 3 | 1,254088199 lipid metabolism |
| Rv0244c | 18 | 5 | 1,25944725 lipid metabolism  |
| Rv1925  | 22 | 6 | 1,281240785 lipid metabolism |
| Rv1529  | 8  | 1 | 1,56554878 lipid metabolism  |
| Rv1346  | 7  | 1 | 1,56554878 lipid metabolism  |
| Rv1935c | 7  | 1 | 1,56554878 lipid metabolism  |
| Rv3543c | 7  | 1 | 1,56554878 lipid metabolism  |
| Rv0129c | 6  | 1 | 1,56554878 lipid metabolism  |

|         |    |   |                             |
|---------|----|---|-----------------------------|
| Rv0271c | 6  | 1 | 1,56554878 lipid metabolism |
| Rv0400c | 6  | 1 | 1,56554878 lipid metabolism |
| Rv0503c | 12 | 2 | 1,56554878 lipid metabolism |
| Rv0644c | 6  | 1 | 1,56554878 lipid metabolism |
| Rv0673  | 6  | 1 | 1,56554878 lipid metabolism |
| Rv0914c | 6  | 1 | 1,56554878 lipid metabolism |
| Rv1492  | 6  | 1 | 1,56554878 lipid metabolism |
| Rv0214  | 11 | 2 | 1,56554878 lipid metabolism |
| Rv1665  | 16 | 3 | 1,56554878 lipid metabolism |
| Rv0470c | 5  | 1 | 1,56554878 lipid metabolism |
| Rv0632c | 10 | 2 | 1,56554878 lipid metabolism |
| Rv0645c | 5  | 1 | 1,56554878 lipid metabolism |
| Rv0672  | 10 | 2 | 1,56554878 lipid metabolism |
| Rv0972c | 5  | 1 | 1,56554878 lipid metabolism |
| Rv1347c | 5  | 1 | 1,56554878 lipid metabolism |
| Rv1750c | 5  | 1 | 1,56554878 lipid metabolism |
| Rv1822  | 5  | 1 | 1,56554878 lipid metabolism |
| Rv2505c | 5  | 1 | 1,56554878 lipid metabolism |
| Rv3234c | 5  | 1 | 1,56554878 lipid metabolism |
| Rv3556c | 5  | 1 | 1,56554878 lipid metabolism |
| Rv3803c | 10 | 2 | 1,56554878 lipid metabolism |
| Rv0873  | 9  | 2 | 1,56554878 lipid metabolism |
| Rv1814  | 9  | 2 | 1,56554878 lipid metabolism |
| Rv2502c | 9  | 2 | 1,56554878 lipid metabolism |
| Rv3774  | 9  | 2 | 1,56554878 lipid metabolism |
| Rv3523  | 17 | 4 | 1,56554878 lipid metabolism |
| Rv0405  | 4  | 1 | 1,56554878 lipid metabolism |
| Rv1013  | 4  | 1 | 1,56554878 lipid metabolism |
| Rv1070c | 4  | 1 | 1,56554878 lipid metabolism |
| Rv1071c | 4  | 1 | 1,56554878 lipid metabolism |
| Rv1175c | 4  | 1 | 1,56554878 lipid metabolism |
| Rv1493  | 4  | 1 | 1,56554878 lipid metabolism |
| Rv2524c | 4  | 1 | 1,56554878 lipid metabolism |
| Rv2590  | 8  | 2 | 1,56554878 lipid metabolism |

|         |    |   |                             |
|---------|----|---|-----------------------------|
| Rv2950c | 16 | 4 | 1,56554878 lipid metabolism |
| Rv3089  | 4  | 1 | 1,56554878 lipid metabolism |
| Rv0033  | 1  | 0 | 1,56554878 lipid metabolism |
| Rv0035  | 0  | 0 | 1,56554878 lipid metabolism |
| Rv0119  | 0  | 0 | 1,56554878 lipid metabolism |
| Rv0231  | 1  | 0 | 1,56554878 lipid metabolism |
| Rv0404  | 1  | 0 | 1,56554878 lipid metabolism |
| Rv0456c | 1  | 0 | 1,56554878 lipid metabolism |
| Rv0649  | 0  | 0 | 1,56554878 lipid metabolism |
| Rv0731c | 0  | 0 | 1,56554878 lipid metabolism |
| Rv0855  | 2  | 0 | 1,56554878 lipid metabolism |
| Rv0893c | 0  | 0 | 1,56554878 lipid metabolism |
| Rv0895  | 1  | 0 | 1,56554878 lipid metabolism |
| Rv0971c | 2  | 0 | 1,56554878 lipid metabolism |
| Rv0974c | 1  | 0 | 1,56554878 lipid metabolism |
| Rv1142c | 1  | 0 | 1,56554878 lipid metabolism |
| Rv1143  | 1  | 0 | 1,56554878 lipid metabolism |
| Rv1427c | 0  | 0 | 1,56554878 lipid metabolism |
| Rv1549  | 1  | 0 | 1,56554878 lipid metabolism |
| Rv1550  | 1  | 0 | 1,56554878 lipid metabolism |
| Rv1551  | 0  | 0 | 1,56554878 lipid metabolism |
| Rv1715  | 3  | 0 | 1,56554878 lipid metabolism |
| Rv1722  | 3  | 0 | 1,56554878 lipid metabolism |
| Rv1729c | 1  | 0 | 1,56554878 lipid metabolism |
| Rv1866  | 1  | 0 | 1,56554878 lipid metabolism |
| Rv1867  | 0  | 0 | 1,56554878 lipid metabolism |
| Rv1912c | 4  | 0 | 1,56554878 lipid metabolism |
| Rv1934c | 3  | 0 | 1,56554878 lipid metabolism |
| Rv2002  | 2  | 0 | 1,56554878 lipid metabolism |
| Rv2173  | 3  | 0 | 1,56554878 lipid metabolism |
| Rv2187  | 4  | 0 | 1,56554878 lipid metabolism |
| Rv2285  | 1  | 0 | 1,56554878 lipid metabolism |
| Rv2377c | 0  | 0 | 1,56554878 lipid metabolism |
| Rv2378c | 1  | 0 | 1,56554878 lipid metabolism |

|         |     |    |                                  |
|---------|-----|----|----------------------------------|
| Rv2379c | 1   | 0  | 1,56554878 lipid metabolism      |
| Rv2381c | 0   | 0  | 1,56554878 lipid metabolism      |
| Rv2382c | 1   | 0  | 1,56554878 lipid metabolism      |
| Rv2384  | 1   | 0  | 1,56554878 lipid metabolism      |
| Rv2482c | 2   | 0  | 1,56554878 lipid metabolism      |
| Rv2486  | 4   | 0  | 1,56554878 lipid metabolism      |
| Rv2746c | 3   | 0  | 1,56554878 lipid metabolism      |
| Rv2934  | 1   | 0  | 1,56554878 lipid metabolism      |
| Rv2953  | 1   | 0  | 1,56554878 lipid metabolism      |
| Rv3039c | 1   | 0  | 1,56554878 lipid metabolism      |
| Rv3088  | 1   | 0  | 1,56554878 lipid metabolism      |
| Rv3392c | 1   | 0  | 1,56554878 lipid metabolism      |
| Rv3398c | 0   | 0  | 1,56554878 lipid metabolism      |
| Rv3506  | 3   | 0  | 1,56554878 lipid metabolism      |
| Rv3522  | 1   | 0  | 1,56554878 lipid metabolism      |
| Rv3550  | 1   | 0  | 1,56554878 lipid metabolism      |
| Rv3560c | 1   | 0  | 1,56554878 lipid metabolism      |
| Rv3561  | 0   | 0  | 1,56554878 lipid metabolism      |
| Rv3562  | 0   | 0  | 1,56554878 lipid metabolism      |
| Rv3563  | 1   | 0  | 1,56554878 lipid metabolism      |
| Rv3564  | 0   | 0  | 1,56554878 lipid metabolism      |
| Rv3790  | 1   | 0  | 1,56554878 lipid metabolism      |
| Rv3797  | 2   | 0  | 1,56554878 lipid metabolism      |
| Rv3820c | 1   | 0  | 1,56554878 lipid metabolism      |
| Rv3826  | 1   | 0  | 1,56554878 lipid metabolism      |
| Rv0705  | 32  | 19 | 0,056238672 information pathways |
| Rv0718  | 6   | 7  | 0,079826219 information pathways |
| Rv2058c | 1   | 4  | 0,080382111 information pathways |
| Rv2793c | 16  | 12 | 0,081475333 information pathways |
| Rv1388  | 20  | 13 | 0,0920192 information pathways   |
| Rv2710  | 270 | 42 | 0,100180943 information pathways |
| Rv3221A | 140 | 18 | 0,111017746 information pathways |
| Rv0006  | 7   | 7  | 0,120728181 information pathways |
| Rv3460c | 158 | 22 | 0,162789799 information pathways |

|         |     |    |                                  |
|---------|-----|----|----------------------------------|
| Rv1536  | 31  | 16 | 0,177938301 information pathways |
| Rv2412  | 6   | 6  | 0,186422826 information pathways |
| Rv2838c | 52  | 4  | 0,189210295 information pathways |
| Rv1390  | 84  | 9  | 0,189557979 information pathways |
| Rv0861c | 4   | 5  | 0,191150027 information pathways |
| Rv1080c | 113 | 14 | 0,192433103 information pathways |
| Rv1630  | 16  | 10 | 0,238137275 information pathways |
| Rv0707  | 13  | 9  | 0,256217481 information pathways |
| Rv2889c | 7   | 6  | 0,261885 information pathways    |
| Rv3442c | 7   | 6  | 0,261885 information pathways    |
| Rv1340  | 3   | 4  | 0,292939524 information pathways |
| Rv1696  | 3   | 4  | 0,292939524 information pathways |
| Rv3443c | 3   | 4  | 0,292939524 information pathways |
| Rv0668  | 23  | 12 | 0,301872941 information pathways |
| Rv3461c | 143 | 49 | 0,324330268 information pathways |
| Rv0715  | 15  | 9  | 0,326357778 information pathways |
| Rv0721  | 20  | 11 | 0,332317467 information pathways |
| Rv0639  | 38  | 17 | 0,338179498 information pathways |
| Rv0706  | 6   | 5  | 0,380970124 information pathways |
| Rv2845c | 2   | 3  | 0,422118767 information pathways |
| Rv0723  | 14  | 8  | 0,430615955 information pathways |
| Rv0684  | 31  | 14 | 0,438719185 information pathways |
| Rv2882c | 7   | 5  | 0,485900548 information pathways |
| Rv2904c | 50  | 20 | 0,494421922 information pathways |
| Rv2441c | 60  | 23 | 0,504593274 information pathways |
| Rv0717  | 35  | 15 | 0,515517965 information pathways |
| Rv0005  | 12  | 7  | 0,538915113 information pathways |
| Rv0054  | 5   | 4  | 0,552732111 information pathways |
| Rv3048c | 47  | 5  | 0,557025238 information pathways |
| Rv2907c | 13  | 0  | 0,601558311 information pathways |
| Rv0516c | 28  | 2  | 0,615601166 information pathways |
| Rv0720  | 10  | 6  | 0,620086754 information pathways |
| Rv0979A | 10  | 6  | 0,620086754 information pathways |
| Rv0735  | 3   | 3  | 0,62647 information pathways     |

|         |     |    |                                  |
|---------|-----|----|----------------------------------|
| Rv3715c | 3   | 3  | 0,62647 information pathways     |
| Rv2069  | 1   | 2  | 0,643390112 information pathways |
| Rv3908  | 1   | 2  | 0,643390112 information pathways |
| Rv3597c | 94  | 14 | 0,654128977 information pathways |
| Rv1644  | 6   | 4  | 0,654786705 information pathways |
| Rv1700  | 6   | 4  | 0,654786705 information pathways |
| Rv0719  | 23  | 10 | 0,708355556 information pathways |
| Rv3462c | 236 | 70 | 0,738516854 information pathways |
| Rv0053  | 4   | 3  | 0,787843454 information pathways |
| Rv2890c | 4   | 3  | 0,787843454 information pathways |
| Rv3062  | 18  | 1  | 0,816741656 information pathways |
| Rv3051c | 119 | 20 | 0,863159533 information pathways |
| Rv2703  | 21  | 9  | 0,863529199 information pathways |
| Rv0670  | 30  | 3  | 0,872181818 information pathways |
| Rv0071  | 0   | 1  | 0,891983427 information pathways |
| Rv1316c | 0   | 1  | 0,891983427 information pathways |
| Rv3011c | 0   | 1  | 0,891983427 information pathways |
| Rv0009  | 2   | 2  | 0,902076825 information pathways |
| Rv0938  | 2   | 2  | 0,902076825 information pathways |
| Rv1253  | 2   | 2  | 0,902076825 information pathways |
| Rv1537  | 2   | 2  | 0,902076825 information pathways |
| Rv1689  | 2   | 2  | 0,902076825 information pathways |
| Rv3852  | 2   | 2  | 0,902076825 information pathways |
| Rv3287c | 34  | 4  | 0,92091893 information pathways  |
| Rv3211  | 16  | 1  | 0,937059063 information pathways |
| Rv3223c | 114 | 20 | 0,945833871 information pathways |
| Rv0651  | 20  | 8  | 0,950979338 information pathways |
| Rv2785c | 59  | 19 | 0,966140741 information pathways |
| Rv3923c | 33  | 12 | 0,966365314 information pathways |
| Rv2839c | 68  | 11 | 0,967746359 information pathways |
| Rv3455c | 13  | 6  | 0,9805796 information pathways   |
| Rv0716  | 7   | 4  | 0,987885942 information pathways |
| Rv2442c | 80  | 25 | 0,996424475 information pathways |
| Rv0120c | 3   | 2  | 1,017645149 information pathways |

|         |     |    |                                  |
|---------|-----|----|----------------------------------|
| Rv3053c | 185 | 38 | 1,026612696 information pathways |
| Rv2464c | 19  | 2  | 1,042681352 information pathways |
| Rv1015c | 7   | 3  | 1,073553923 information pathways |
| Rv1299  | 77  | 14 | 1,073836755 information pathways |
| Rv1642  | 11  | 4  | 1,075323219 information pathways |
| Rv2783c | 11  | 4  | 1,075323219 information pathways |
| Rv1641  | 31  | 10 | 1,081092449 information pathways |
| Rv2444c | 26  | 8  | 1,081801222 information pathways |
| Rv3204  | 16  | 5  | 1,082039404 information pathways |
| Rv2986c | 17  | 7  | 1,084512 information pathways    |
| Rv3459c | 48  | 14 | 1,087460905 information pathways |
| Rv2594c | 5   | 0  | 1,093861497 information pathways |
| Rv3241c | 21  | 3  | 1,097160937 information pathways |
| Rv0683  | 44  | 8  | 1,098096472 information pathways |
| Rv0001  | 6   | 0  | 1,107198572 information pathways |
| Rv3286c | 10  | 4  | 1,115414979 information pathways |
| Rv3924c | 82  | 22 | 1,120314411 information pathways |
| Rv0667  | 97  | 29 | 1,123626831 information pathways |
| Rv2555c | 97  | 20 | 1,127803864 information pathways |
| Rv1420  | 5   | 2  | 1,132270883 information pathways |
| Rv1633  | 5   | 2  | 1,132270883 information pathways |
| Rv2448c | 5   | 2  | 1,132270883 information pathways |
| Rv3721c | 5   | 2  | 1,132270883 information pathways |
| Rv0682  | 62  | 11 | 1,13571201 information pathways  |
| Rv0722  | 35  | 6  | 1,142666132 information pathways |
| Rv0714  | 24  | 7  | 1,143516538 information pathways |
| Rv3458c | 36  | 11 | 1,146176598 information pathways |
| Rv1298  | 212 | 59 | 1,148430308 information pathways |
| Rv2836c | 6   | 2  | 1,154704835 information pathways |
| Rv3420c | 6   | 2  | 1,154704835 information pathways |
| Rv0058  | 1   | 1  | 1,155519357 information pathways |
| Rv0429c | 1   | 1  | 1,155519357 information pathways |
| Rv0444c | 1   | 1  | 1,155519357 information pathways |
| Rv0629c | 1   | 1  | 1,155519357 information pathways |



|         |   |   |                                  |
|---------|---|---|----------------------------------|
| Rv1160  | 1 | 1 | 1,155519357 information pathways |
| Rv1165  | 1 | 1 | 1,155519357 information pathways |
| Rv1189  | 1 | 1 | 1,155519357 information pathways |
| Rv1329c | 1 | 1 | 1,155519357 information pathways |
| Rv1402  | 1 | 1 | 1,155519357 information pathways |
| Rv1649  | 1 | 1 | 1,155519357 information pathways |
| Rv1650  | 1 | 1 | 1,155519357 information pathways |
| Rv1688  | 1 | 1 | 1,155519357 information pathways |
| Rv2056c | 1 | 1 | 1,155519357 information pathways |
| Rv2101  | 1 | 1 | 1,155519357 information pathways |
| Rv2572c | 1 | 1 | 1,155519357 information pathways |
| Rv2580c | 1 | 1 | 1,155519357 information pathways |
| Rv2755c | 1 | 1 | 1,155519357 information pathways |
| Rv2761c | 1 | 1 | 1,155519357 information pathways |
| Rv2973c | 1 | 1 | 1,155519357 information pathways |
| Rv3296  | 1 | 1 | 1,155519357 information pathways |
| Rv3649  | 1 | 1 | 1,155519357 information pathways |
| Rv3907c | 1 | 1 | 1,155519357 information pathways |
| Rv3687c | 9 | 1 | 1,171820425 information pathways |
| Rv0427c | 2 | 1 | 1,177742083 information pathways |
| Rv0949  | 2 | 1 | 1,177742083 information pathways |
| Rv1007c | 2 | 1 | 1,177742083 information pathways |
| Rv1292  | 2 | 1 | 1,177742083 information pathways |
| Rv1547  | 2 | 1 | 1,177742083 information pathways |
| Rv2092c | 2 | 1 | 1,177742083 information pathways |
| Rv2343c | 2 | 1 | 1,177742083 information pathways |
| Rv2736c | 2 | 1 | 1,177742083 information pathways |
| Rv2992c | 2 | 1 | 1,177742083 information pathways |
| Rv3014c | 2 | 1 | 1,177742083 information pathways |
| Rv3105c | 2 | 1 | 1,177742083 information pathways |
| Rv3370c | 2 | 1 | 1,177742083 information pathways |
| Rv2362c | 7 | 2 | 1,179167167 information pathways |
| Rv0041  | 3 | 1 | 1,180692338 information pathways |
| Rv0995  | 3 | 1 | 1,180692338 information pathways |

|         |    |   |                                  |
|---------|----|---|----------------------------------|
| Rv1010  | 3  | 1 | 1,180692338 information pathways |
| Rv1107c | 3  | 1 | 1,180692338 information pathways |
| Rv1108c | 3  | 1 | 1,180692338 information pathways |
| Rv2228c | 3  | 1 | 1,180692338 information pathways |
| Rv2737c | 3  | 1 | 1,180692338 information pathways |
| Rv2976c | 3  | 1 | 1,180692338 information pathways |
| Rv2985  | 3  | 1 | 1,180692338 information pathways |
| Rv3024c | 3  | 1 | 1,180692338 information pathways |
| Rv3198c | 3  | 1 | 1,180692338 information pathways |
| Rv3201c | 3  | 1 | 1,180692338 information pathways |
| Rv3202c | 3  | 1 | 1,180692338 information pathways |
| Rv3328c | 3  | 1 | 1,180692338 information pathways |
| Rv0182c | 4  | 2 | 1,186675548 information pathways |
| Rv1365c | 4  | 2 | 1,186675548 information pathways |
| Rv3731  | 4  | 2 | 1,186675548 information pathways |
| Rv2533c | 10 | 3 | 1,188374024 information pathways |
| Rv2909c | 14 | 2 | 1,213683268 information pathways |
| Rv0056  | 13 | 4 | 1,218883666 information pathways |
| Rv2841c | 13 | 4 | 1,218883666 information pathways |
| Rv2534c | 15 | 4 | 1,243303357 information pathways |
| Rv0640  | 44 | 9 | 1,351608858 information pathways |
| Rv3711c | 8  | 1 | 1,56554878 information pathways  |
| Rv1364c | 7  | 1 | 1,56554878 information pathways  |
| Rv2614c | 6  | 1 | 1,56554878 information pathways  |
| Rv3414c | 6  | 1 | 1,56554878 information pathways  |
| Rv3598c | 6  | 1 | 1,56554878 information pathways  |
| Rv1259  | 11 | 2 | 1,56554878 information pathways  |
| Rv1981c | 16 | 3 | 1,56554878 information pathways  |
| Rv1638  | 5  | 1 | 1,56554878 information pathways  |
| Rv2756c | 5  | 1 | 1,56554878 information pathways  |
| Rv3646c | 5  | 1 | 1,56554878 information pathways  |
| Rv3009c | 9  | 2 | 1,56554878 information pathways  |
| Rv2925c | 40 | 9 | 1,56554878 information pathways  |
| Rv3457c | 33 | 8 | 1,56554878 information pathways  |

|         |    |   |                                 |
|---------|----|---|---------------------------------|
| Rv0002  | 4  | 1 | 1,56554878 information pathways |
| Rv0003  | 8  | 2 | 1,56554878 information pathways |
| Rv0055  | 24 | 6 | 1,56554878 information pathways |
| Rv0445c | 4  | 1 | 1,56554878 information pathways |
| Rv0937c | 4  | 1 | 1,56554878 information pathways |
| Rv1210  | 4  | 1 | 1,56554878 information pathways |
| Rv1407  | 4  | 1 | 1,56554878 information pathways |
| Rv2057c | 8  | 2 | 1,56554878 information pathways |
| Rv2357c | 4  | 1 | 1,56554878 information pathways |
| Rv2902c | 12 | 3 | 1,56554878 information pathways |
| Rv2906c | 12 | 3 | 1,56554878 information pathways |
| Rv3580c | 16 | 4 | 1,56554878 information pathways |
| Rv3644c | 8  | 2 | 1,56554878 information pathways |
| Rv0105c | 1  | 0 | 1,56554878 information pathways |
| Rv0413  | 3  | 0 | 1,56554878 information pathways |
| Rv0630c | 0  | 0 | 1,56554878 information pathways |
| Rv0631c | 1  | 0 | 1,56554878 information pathways |
| Rv0736  | 1  | 0 | 1,56554878 information pathways |
| Rv0944  | 1  | 0 | 1,56554878 information pathways |
| Rv1020  | 3  | 0 | 1,56554878 information pathways |
| Rv1406  | 1  | 0 | 1,56554878 information pathways |
| Rv1629  | 1  | 0 | 1,56554878 information pathways |
| Rv1640c | 2  | 0 | 1,56554878 information pathways |
| Rv2055c | 2  | 0 | 1,56554878 information pathways |
| Rv2090  | 0  | 0 | 1,56554878 information pathways |
| Rv2191  | 0  | 0 | 1,56554878 information pathways |
| Rv2528c | 2  | 0 | 1,56554878 information pathways |
| Rv2582  | 1  | 0 | 1,56554878 information pathways |
| Rv2592c | 1  | 0 | 1,56554878 information pathways |
| Rv2593c | 0  | 0 | 1,56554878 information pathways |
| Rv2924c | 2  | 0 | 1,56554878 information pathways |
| Rv3012c | 1  | 0 | 1,56554878 information pathways |
| Rv3056  | 2  | 0 | 1,56554878 information pathways |
| Rv3263  | 1  | 0 | 1,56554878 information pathways |

|         |    |    |                                          |
|---------|----|----|------------------------------------------|
| Rv3297  | 0  | 0  | 1,56554878 information pathways          |
| Rv3336c | 2  | 0  | 1,56554878 information pathways          |
| Rv3366  | 0  | 0  | 1,56554878 information pathways          |
| Rv3585  | 1  | 0  | 1,56554878 information pathways          |
| Rv3589  | 2  | 0  | 1,56554878 information pathways          |
| Rv3834c | 0  | 0  | 1,56554878 information pathways          |
| Rv3911  | 1  | 0  | 1,56554878 information pathways          |
| Rv4000  | 0  | 0  | 1,56554878 information pathways          |
| Rv1857  | 2  | 5  | 0,060235783 cell wall and cell processes |
| Rv2732c | 2  | 5  | 0,060235783 cell wall and cell processes |
| Rv2876  | 4  | 6  | 0,075179176 cell wall and cell processes |
| Rv2692  | 6  | 7  | 0,079826219 cell wall and cell processes |
| Rv2346c | 16 | 12 | 0,081475333 cell wall and cell processes |
| Rv2158c | 11 | 9  | 0,10429684 cell wall and cell processes  |
| Rv1899c | 18 | 12 | 0,11235254 cell wall and cell processes  |
| Rv0175  | 15 | 11 | 0,120806988 cell wall and cell processes |
| Rv2290  | 5  | 6  | 0,121545602 cell wall and cell processes |
| Rv3864  | 48 | 3  | 0,143063488 cell wall and cell processes |
| Rv2094c | 73 | 31 | 0,146697275 cell wall and cell processes |
| Rv3289c | 96 | 11 | 0,166070568 cell wall and cell processes |
| Rv3017c | 8  | 7  | 0,174733036 cell wall and cell processes |
| Rv1737c | 2  | 4  | 0,176306516 cell wall and cell processes |
| Rv3695  | 2  | 4  | 0,176306516 cell wall and cell processes |
| Rv2643  | 46 | 3  | 0,189583102 cell wall and cell processes |
| Rv2875  | 4  | 5  | 0,191150027 cell wall and cell processes |
| Rv1678  | 1  | 3  | 0,257111256 cell wall and cell processes |
| Rv1224  | 69 | 7  | 0,27813343 cell wall and cell processes  |
| Rv3264c | 5  | 5  | 0,286174169 cell wall and cell processes |
| Rv0638  | 46 | 20 | 0,287952172 cell wall and cell processes |
| Rv1510  | 3  | 4  | 0,292939524 cell wall and cell processes |
| Rv2585c | 3  | 4  | 0,292939524 cell wall and cell processes |
| Rv0954  | 10 | 7  | 0,300911 cell wall and cell processes    |
| Rv0477  | 47 | 4  | 0,310928307 cell wall and cell processes |
| Rv0202c | 15 | 9  | 0,326357778 cell wall and cell processes |

|         |    |    |                                          |
|---------|----|----|------------------------------------------|
| Rv2784c | 15 | 9  | 0,326357778 cell wall and cell processes |
| Rv2144c | 37 | 17 | 0,330806857 cell wall and cell processes |
| Rv1440  | 8  | 6  | 0,33098 cell wall and cell processes     |
| Rv0841  | 0  | 2  | 0,334966855 cell wall and cell processes |
| Rv2693c | 58 | 6  | 0,343219541 cell wall and cell processes |
| Rv0284  | 6  | 5  | 0,380970124 cell wall and cell processes |
| Rv1463  | 6  | 5  | 0,380970124 cell wall and cell processes |
| Rv1799  | 6  | 5  | 0,380970124 cell wall and cell processes |
| Rv2081c | 6  | 5  | 0,380970124 cell wall and cell processes |
| Rv0559c | 32 | 2  | 0,403010379 cell wall and cell processes |
| Rv0116c | 9  | 6  | 0,411415431 cell wall and cell processes |
| Rv0283  | 4  | 4  | 0,413484436 cell wall and cell processes |
| Rv0073  | 2  | 3  | 0,422118767 cell wall and cell processes |
| Rv2968c | 2  | 3  | 0,422118767 cell wall and cell processes |
| Rv3866  | 43 | 4  | 0,482878095 cell wall and cell processes |
| Rv0206c | 7  | 5  | 0,485900548 cell wall and cell processes |
| Rv1037c | 7  | 5  | 0,485900548 cell wall and cell processes |
| Rv2136c | 7  | 5  | 0,485900548 cell wall and cell processes |
| Rv2326c | 7  | 5  | 0,485900548 cell wall and cell processes |
| Rv3682  | 7  | 5  | 0,485900548 cell wall and cell processes |
| Rv0383c | 72 | 9  | 0,487468021 cell wall and cell processes |
| Rv0996  | 29 | 2  | 0,512739259 cell wall and cell processes |
| Rv0676c | 24 | 1  | 0,514657183 cell wall and cell processes |
| Rv0483  | 5  | 4  | 0,552732111 cell wall and cell processes |
| Rv2588c | 5  | 4  | 0,552732111 cell wall and cell processes |
| Rv0476  | 63 | 23 | 0,609201185 cell wall and cell processes |
| Rv0961  | 13 | 7  | 0,612753691 cell wall and cell processes |
| Rv2399c | 13 | 7  | 0,612753691 cell wall and cell processes |
| Rv3092c | 13 | 7  | 0,612753691 cell wall and cell processes |
| Rv2037c | 10 | 6  | 0,620086754 cell wall and cell processes |
| Rv0343  | 3  | 3  | 0,62647 cell wall and cell processes     |
| Rv1132  | 3  | 3  | 0,62647 cell wall and cell processes     |
| Rv1997  | 3  | 3  | 0,62647 cell wall and cell processes     |
| Rv3669  | 3  | 3  | 0,62647 cell wall and cell processes     |

|         |    |    |                                          |
|---------|----|----|------------------------------------------|
| Rv3910  | 3  | 3  | 0,62647 cell wall and cell processes     |
| Rv0188  | 51 | 6  | 0,626585024 cell wall and cell processes |
| Rv1911c | 19 | 9  | 0,628550418 cell wall and cell processes |
| Rv0218  | 1  | 2  | 0,643390112 cell wall and cell processes |
| Rv0732  | 1  | 2  | 0,643390112 cell wall and cell processes |
| Rv1140  | 1  | 2  | 0,643390112 cell wall and cell processes |
| Rv1226c | 1  | 2  | 0,643390112 cell wall and cell processes |
| Rv1368  | 1  | 2  | 0,643390112 cell wall and cell processes |
| Rv2039c | 1  | 2  | 0,643390112 cell wall and cell processes |
| Rv2434c | 1  | 2  | 0,643390112 cell wall and cell processes |
| Rv2446c | 1  | 2  | 0,643390112 cell wall and cell processes |
| Rv3658c | 1  | 2  | 0,643390112 cell wall and cell processes |
| Rv3792  | 1  | 2  | 0,643390112 cell wall and cell processes |
| Rv0419  | 6  | 4  | 0,654786705 cell wall and cell processes |
| Rv2877c | 6  | 4  | 0,654786705 cell wall and cell processes |
| Rv3271c | 6  | 4  | 0,654786705 cell wall and cell processes |
| Rv1980c | 22 | 10 | 0,659840227 cell wall and cell processes |
| Rv2869c | 11 | 6  | 0,691629379 cell wall and cell processes |
| Rv0849  | 11 | 0  | 0,766641622 cell wall and cell processes |
| Rv2025c | 12 | 0  | 0,768877005 cell wall and cell processes |
| Rv3871  | 18 | 8  | 0,771275632 cell wall and cell processes |
| Rv0461  | 4  | 3  | 0,787843454 cell wall and cell processes |
| Rv0545c | 4  | 3  | 0,787843454 cell wall and cell processes |
| Rv1639c | 4  | 3  | 0,787843454 cell wall and cell processes |
| Rv1710  | 4  | 3  | 0,787843454 cell wall and cell processes |
| Rv3891c | 4  | 3  | 0,787843454 cell wall and cell processes |
| Rv2254c | 15 | 7  | 0,815433256 cell wall and cell processes |
| Rv0985c | 18 | 1  | 0,816741656 cell wall and cell processes |
| Rv1795  | 22 | 9  | 0,827752535 cell wall and cell processes |
| Rv2146c | 48 | 17 | 0,858459818 cell wall and cell processes |
| Rv2198c | 30 | 3  | 0,872181818 cell wall and cell processes |
| Rv1337  | 26 | 10 | 0,880895119 cell wall and cell processes |
| Rv3878  | 22 | 2  | 0,883477824 cell wall and cell processes |
| Rv1086  | 10 | 5  | 0,886611927 cell wall and cell processes |

|         |    |   |                                          |
|---------|----|---|------------------------------------------|
| Rv0431  | 5  | 3 | 0,890066667 cell wall and cell processes |
| Rv1342c | 5  | 3 | 0,890066667 cell wall and cell processes |
| Rv3629c | 5  | 3 | 0,890066667 cell wall and cell processes |
| Rv0519c | 0  | 1 | 0,891983427 cell wall and cell processes |
| Rv0907  | 0  | 1 | 0,891983427 cell wall and cell processes |
| Rv1183  | 0  | 1 | 0,891983427 cell wall and cell processes |
| Rv1458c | 0  | 1 | 0,891983427 cell wall and cell processes |
| Rv1541c | 0  | 1 | 0,891983427 cell wall and cell processes |
| Rv1677  | 0  | 1 | 0,891983427 cell wall and cell processes |
| Rv1686c | 0  | 1 | 0,891983427 cell wall and cell processes |
| Rv1744c | 0  | 1 | 0,891983427 cell wall and cell processes |
| Rv2040c | 0  | 1 | 0,891983427 cell wall and cell processes |
| Rv2153c | 0  | 1 | 0,891983427 cell wall and cell processes |
| Rv3807c | 0  | 1 | 0,891983427 cell wall and cell processes |
| Rv0072  | 2  | 2 | 0,902076825 cell wall and cell processes |
| Rv0093c | 2  | 2 | 0,902076825 cell wall and cell processes |
| Rv0199  | 2  | 2 | 0,902076825 cell wall and cell processes |
| Rv1146  | 2  | 2 | 0,902076825 cell wall and cell processes |
| Rv1227c | 2  | 2 | 0,902076825 cell wall and cell processes |
| Rv1281c | 2  | 2 | 0,902076825 cell wall and cell processes |
| Rv1343c | 2  | 2 | 0,902076825 cell wall and cell processes |
| Rv1401  | 2  | 2 | 0,902076825 cell wall and cell processes |
| Rv1607  | 2  | 2 | 0,902076825 cell wall and cell processes |
| Rv1634  | 2  | 2 | 0,902076825 cell wall and cell processes |
| Rv1824  | 2  | 2 | 0,902076825 cell wall and cell processes |
| Rv2329c | 2  | 2 | 0,902076825 cell wall and cell processes |
| Rv2450c | 2  | 2 | 0,902076825 cell wall and cell processes |
| Rv2856  | 2  | 2 | 0,902076825 cell wall and cell processes |
| Rv2965c | 2  | 2 | 0,902076825 cell wall and cell processes |
| Rv3044  | 2  | 2 | 0,902076825 cell wall and cell processes |
| Rv3312A | 2  | 2 | 0,902076825 cell wall and cell processes |
| Rv1488  | 11 | 5 | 0,915485005 cell wall and cell processes |
| Rv3694c | 11 | 5 | 0,915485005 cell wall and cell processes |
| Rv2743c | 34 | 4 | 0,92091893 cell wall and cell processes  |

|         |    |    |                                          |
|---------|----|----|------------------------------------------|
| Rv2709  | 16 | 1  | 0,937059063 cell wall and cell processes |
| Rv3197  | 14 | 6  | 0,966007031 cell wall and cell processes |
| Rv2462c | 23 | 8  | 0,971879662 cell wall and cell processes |
| Rv0821c | 13 | 5  | 0,979843859 cell wall and cell processes |
| Rv0835  | 8  | 0  | 0,980645136 cell wall and cell processes |
| Rv1038c | 8  | 0  | 0,980645136 cell wall and cell processes |
| Rv3620c | 8  | 0  | 0,980645136 cell wall and cell processes |
| Rv1417  | 7  | 4  | 0,987885942 cell wall and cell processes |
| Rv3217c | 7  | 4  | 0,987885942 cell wall and cell processes |
| Rv3763  | 7  | 4  | 0,987885942 cell wall and cell processes |
| Rv2115c | 34 | 12 | 0,991820994 cell wall and cell processes |
| Rv3213c | 8  | 4  | 1,000356578 cell wall and cell processes |
| Rv0102  | 3  | 2  | 1,017645149 cell wall and cell processes |
| Rv0143c | 3  | 2  | 1,017645149 cell wall and cell processes |
| Rv0176  | 3  | 2  | 1,017645149 cell wall and cell processes |
| Rv0621  | 3  | 2  | 1,017645149 cell wall and cell processes |
| Rv1619  | 3  | 2  | 1,017645149 cell wall and cell processes |
| Rv1672c | 3  | 2  | 1,017645149 cell wall and cell processes |
| Rv1842c | 3  | 2  | 1,017645149 cell wall and cell processes |
| Rv1863c | 3  | 2  | 1,017645149 cell wall and cell processes |
| Rv2041c | 3  | 2  | 1,017645149 cell wall and cell processes |
| Rv2397c | 3  | 2  | 1,017645149 cell wall and cell processes |
| Rv2698  | 3  | 2  | 1,017645149 cell wall and cell processes |
| Rv2799  | 3  | 2  | 1,017645149 cell wall and cell processes |
| Rv3065  | 3  | 2  | 1,017645149 cell wall and cell processes |
| Rv3069  | 3  | 2  | 1,017645149 cell wall and cell processes |
| Rv3238c | 3  | 2  | 1,017645149 cell wall and cell processes |
| Rv3402c | 3  | 2  | 1,017645149 cell wall and cell processes |
| Rv3450c | 3  | 2  | 1,017645149 cell wall and cell processes |
| Rv3645  | 3  | 2  | 1,017645149 cell wall and cell processes |
| Rv3823c | 3  | 2  | 1,017645149 cell wall and cell processes |
| Rv3882c | 3  | 2  | 1,017645149 cell wall and cell processes |
| Rv3919c | 14 | 5  | 1,020149025 cell wall and cell processes |
| Rv0379  | 6  | 3  | 1,023060102 cell wall and cell processes |



|         |    |    |                                          |
|---------|----|----|------------------------------------------|
| Rv2587c | 6  | 3  | 1,023060102 cell wall and cell processes |
| Rv2690c | 6  | 3  | 1,023060102 cell wall and cell processes |
| Rv2729c | 6  | 3  | 1,023060102 cell wall and cell processes |
| Rv2772c | 6  | 3  | 1,023060102 cell wall and cell processes |
| Rv3451  | 6  | 3  | 1,023060102 cell wall and cell processes |
| Rv0876c | 12 | 1  | 1,031469845 cell wall and cell processes |
| Rv2963  | 12 | 1  | 1,031469845 cell wall and cell processes |
| Rv0412c | 11 | 1  | 1,032354536 cell wall and cell processes |
| Rv1877  | 18 | 2  | 1,036154677 cell wall and cell processes |
| Rv2620c | 18 | 2  | 1,036154677 cell wall and cell processes |
| Rv3876  | 19 | 2  | 1,042681352 cell wall and cell processes |
| Rv0451c | 13 | 1  | 1,045711168 cell wall and cell processes |
| Rv2219  | 16 | 6  | 1,063564022 cell wall and cell processes |
| Rv3867  | 30 | 10 | 1,065552 cell wall and cell processes    |
| Rv2181  | 7  | 3  | 1,073553923 cell wall and cell processes |
| Rv3382c | 7  | 3  | 1,073553923 cell wall and cell processes |
| Rv3675  | 7  | 3  | 1,073553923 cell wall and cell processes |
| Rv2333c | 11 | 4  | 1,075323219 cell wall and cell processes |
| Rv1487  | 32 | 4  | 1,076451578 cell wall and cell processes |
| Rv2389c | 21 | 2  | 1,077283107 cell wall and cell processes |
| Rv2688c | 16 | 5  | 1,082039404 cell wall and cell processes |
| Rv2878c | 16 | 5  | 1,082039404 cell wall and cell processes |
| Rv0309  | 17 | 7  | 1,084512 cell wall and cell processes    |
| Rv2077c | 80 | 14 | 1,088182979 cell wall and cell processes |
| Rv0229c | 5  | 0  | 1,093861497 cell wall and cell processes |
| Rv3632  | 5  | 0  | 1,093861497 cell wall and cell processes |
| Rv3760  | 5  | 0  | 1,093861497 cell wall and cell processes |
| Rv2093c | 30 | 5  | 1,102355081 cell wall and cell processes |
| Rv1234  | 14 | 1  | 1,106515077 cell wall and cell processes |
| Rv0342  | 12 | 4  | 1,106640649 cell wall and cell processes |
| Rv2219A | 12 | 4  | 1,106640649 cell wall and cell processes |
| Rv2138  | 6  | 0  | 1,107198572 cell wall and cell processes |
| Rv3593  | 6  | 0  | 1,107198572 cell wall and cell processes |
| Rv1986  | 48 | 9  | 1,113012946 cell wall and cell processes |

|         |    |   |                                          |
|---------|----|---|------------------------------------------|
| Rv0870c | 10 | 4 | 1,115414979 cell wall and cell processes |
| Rv1312  | 10 | 4 | 1,115414979 cell wall and cell processes |
| Rv1798  | 10 | 4 | 1,115414979 cell wall and cell processes |
| Rv1228  | 18 | 7 | 1,121058282 cell wall and cell processes |
| Rv1783  | 20 | 6 | 1,121612319 cell wall and cell processes |
| Rv1473  | 24 | 4 | 1,12277095 cell wall and cell processes  |
| Rv1707  | 15 | 1 | 1,126699026 cell wall and cell processes |
| Rv2224c | 15 | 1 | 1,126699026 cell wall and cell processes |
| Rv0050  | 5  | 2 | 1,132270883 cell wall and cell processes |
| Rv0686  | 5  | 2 | 1,132270883 cell wall and cell processes |
| Rv0842  | 5  | 2 | 1,132270883 cell wall and cell processes |
| Rv1283c | 5  | 2 | 1,132270883 cell wall and cell processes |
| Rv1476  | 5  | 2 | 1,132270883 cell wall and cell processes |
| Rv2150c | 5  | 2 | 1,132270883 cell wall and cell processes |
| Rv2575  | 5  | 2 | 1,132270883 cell wall and cell processes |
| Rv2942  | 5  | 2 | 1,132270883 cell wall and cell processes |
| Rv2969c | 5  | 2 | 1,132270883 cell wall and cell processes |
| Rv3104c | 5  | 2 | 1,132270883 cell wall and cell processes |
| Rv3605c | 5  | 2 | 1,132270883 cell wall and cell processes |
| Rv0064  | 23 | 7 | 1,133138026 cell wall and cell processes |
| Rv0308  | 8  | 3 | 1,143564814 cell wall and cell processes |
| Rv1238  | 8  | 3 | 1,143564814 cell wall and cell processes |
| Rv1821  | 8  | 3 | 1,143564814 cell wall and cell processes |
| Rv1591  | 15 | 2 | 1,146799395 cell wall and cell processes |
| Rv3879c | 17 | 2 | 1,149582391 cell wall and cell processes |
| Rv0007  | 6  | 2 | 1,154704835 cell wall and cell processes |
| Rv0012  | 6  | 2 | 1,154704835 cell wall and cell processes |
| Rv0346c | 6  | 2 | 1,154704835 cell wall and cell processes |
| Rv0364  | 6  | 2 | 1,154704835 cell wall and cell processes |
| Rv0900  | 6  | 2 | 1,154704835 cell wall and cell processes |
| Rv0935  | 6  | 2 | 1,154704835 cell wall and cell processes |
| Rv1861  | 6  | 2 | 1,154704835 cell wall and cell processes |
| Rv2272  | 6  | 2 | 1,154704835 cell wall and cell processes |
| Rv2673  | 6  | 2 | 1,154704835 cell wall and cell processes |

|         |   |   |                                          |
|---------|---|---|------------------------------------------|
| Rv2686c | 6 | 2 | 1,154704835 cell wall and cell processes |
| Rv2691  | 6 | 2 | 1,154704835 cell wall and cell processes |
| Rv0048c | 1 | 1 | 1,155519357 cell wall and cell processes |
| Rv0051  | 1 | 1 | 1,155519357 cell wall and cell processes |
| Rv0090  | 1 | 1 | 1,155519357 cell wall and cell processes |
| Rv0092  | 1 | 1 | 1,155519357 cell wall and cell processes |
| Rv0107c | 1 | 1 | 1,155519357 cell wall and cell processes |
| Rv0115  | 1 | 1 | 1,155519357 cell wall and cell processes |
| Rv0227c | 1 | 1 | 1,155519357 cell wall and cell processes |
| Rv0399c | 1 | 1 | 1,155519357 cell wall and cell processes |
| Rv0418  | 1 | 1 | 1,155519357 cell wall and cell processes |
| Rv0435c | 1 | 1 | 1,155519357 cell wall and cell processes |
| Rv0518  | 1 | 1 | 1,155519357 cell wall and cell processes |
| Rv0583c | 1 | 1 | 1,155519357 cell wall and cell processes |
| Rv0604  | 1 | 1 | 1,155519357 cell wall and cell processes |
| Rv0867c | 1 | 1 | 1,155519357 cell wall and cell processes |
| Rv0875c | 1 | 1 | 1,155519357 cell wall and cell processes |
| Rv0888  | 1 | 1 | 1,155519357 cell wall and cell processes |
| Rv0901  | 1 | 1 | 1,155519357 cell wall and cell processes |
| Rv0912  | 1 | 1 | 1,155519357 cell wall and cell processes |
| Rv1016c | 1 | 1 | 1,155519357 cell wall and cell processes |
| Rv1018c | 1 | 1 | 1,155519357 cell wall and cell processes |
| Rv1064c | 1 | 1 | 1,155519357 cell wall and cell processes |
| Rv1145  | 1 | 1 | 1,155519357 cell wall and cell processes |
| Rv1217c | 1 | 1 | 1,155519357 cell wall and cell processes |
| Rv1272c | 1 | 1 | 1,155519357 cell wall and cell processes |
| Rv1280c | 1 | 1 | 1,155519357 cell wall and cell processes |
| Rv1338  | 1 | 1 | 1,155519357 cell wall and cell processes |
| Rv1349  | 1 | 1 | 1,155519357 cell wall and cell processes |
| Rv1382  | 1 | 1 | 1,155519357 cell wall and cell processes |
| Rv1424c | 1 | 1 | 1,155519357 cell wall and cell processes |
| Rv1624c | 1 | 1 | 1,155519357 cell wall and cell processes |
| Rv1671  | 1 | 1 | 1,155519357 cell wall and cell processes |
| Rv1687c | 1 | 1 | 1,155519357 cell wall and cell processes |

|         |    |   |                                          |
|---------|----|---|------------------------------------------|
| Rv1709  | 1  | 1 | 1,155519357 cell wall and cell processes |
| Rv1860  | 1  | 1 | 1,155519357 cell wall and cell processes |
| Rv1921c | 1  | 1 | 1,155519357 cell wall and cell processes |
| Rv2046  | 1  | 1 | 1,155519357 cell wall and cell processes |
| Rv2116  | 1  | 1 | 1,155519357 cell wall and cell processes |
| Rv2120c | 1  | 1 | 1,155519357 cell wall and cell processes |
| Rv2152c | 1  | 1 | 1,155519357 cell wall and cell processes |
| Rv2287  | 1  | 1 | 1,155519357 cell wall and cell processes |
| Rv2306A | 1  | 1 | 1,155519357 cell wall and cell processes |
| Rv2437  | 1  | 1 | 1,155519357 cell wall and cell processes |
| Rv2563  | 1  | 1 | 1,155519357 cell wall and cell processes |
| Rv2564  | 1  | 1 | 1,155519357 cell wall and cell processes |
| Rv2609c | 1  | 1 | 1,155519357 cell wall and cell processes |
| Rv2922c | 1  | 1 | 1,155519357 cell wall and cell processes |
| Rv2945c | 1  | 1 | 1,155519357 cell wall and cell processes |
| Rv2994  | 1  | 1 | 1,155519357 cell wall and cell processes |
| Rv3000  | 1  | 1 | 1,155519357 cell wall and cell processes |
| Rv3346c | 1  | 1 | 1,155519357 cell wall and cell processes |
| Rv3445c | 1  | 1 | 1,155519357 cell wall and cell processes |
| Rv3584  | 1  | 1 | 1,155519357 cell wall and cell processes |
| Rv3623  | 1  | 1 | 1,155519357 cell wall and cell processes |
| Rv3625c | 1  | 1 | 1,155519357 cell wall and cell processes |
| Rv3728  | 1  | 1 | 1,155519357 cell wall and cell processes |
| Rv3783  | 1  | 1 | 1,155519357 cell wall and cell processes |
| Rv3680  | 37 | 7 | 1,162033776 cell wall and cell processes |
| Rv0011c | 15 | 5 | 1,167008184 cell wall and cell processes |
| Rv2128  | 10 | 1 | 1,169814587 cell wall and cell processes |
| Rv2687c | 10 | 1 | 1,169814587 cell wall and cell processes |
| Rv3724A | 10 | 1 | 1,169814587 cell wall and cell processes |
| Rv1539  | 33 | 6 | 1,174668724 cell wall and cell processes |
| Rv2347c | 9  | 3 | 1,175481928 cell wall and cell processes |
| Rv2398c | 9  | 3 | 1,175481928 cell wall and cell processes |
| Rv2456c | 9  | 3 | 1,175481928 cell wall and cell processes |
| Rv3301c | 9  | 3 | 1,175481928 cell wall and cell processes |

|         |    |   |                                          |
|---------|----|---|------------------------------------------|
| Rv3881c | 41 | 8 | 1,177037002 cell wall and cell processes |
| Rv0017c | 2  | 1 | 1,177742083 cell wall and cell processes |
| Rv0040c | 2  | 1 | 1,177742083 cell wall and cell processes |
| Rv0292  | 2  | 1 | 1,177742083 cell wall and cell processes |
| Rv0398c | 2  | 1 | 1,177742083 cell wall and cell processes |
| Rv0401  | 2  | 1 | 1,177742083 cell wall and cell processes |
| Rv0446c | 2  | 1 | 1,177742083 cell wall and cell processes |
| Rv0506  | 2  | 1 | 1,177742083 cell wall and cell processes |
| Rv0541c | 2  | 1 | 1,177742083 cell wall and cell processes |
| Rv0584  | 2  | 1 | 1,177742083 cell wall and cell processes |
| Rv0625c | 2  | 1 | 1,177742083 cell wall and cell processes |
| Rv0680c | 2  | 1 | 1,177742083 cell wall and cell processes |
| Rv0924c | 2  | 1 | 1,177742083 cell wall and cell processes |
| Rv0930  | 2  | 1 | 1,177742083 cell wall and cell processes |
| Rv0934  | 2  | 1 | 1,177742083 cell wall and cell processes |
| Rv1002c | 2  | 1 | 1,177742083 cell wall and cell processes |
| Rv1004c | 2  | 1 | 1,177742083 cell wall and cell processes |
| Rv1029  | 2  | 1 | 1,177742083 cell wall and cell processes |
| Rv1115  | 2  | 1 | 1,177742083 cell wall and cell processes |
| Rv1230c | 2  | 1 | 1,177742083 cell wall and cell processes |
| Rv1231c | 2  | 1 | 1,177742083 cell wall and cell processes |
| Rv1244  | 2  | 1 | 1,177742083 cell wall and cell processes |
| Rv1258c | 2  | 1 | 1,177742083 cell wall and cell processes |
| Rv1348  | 2  | 1 | 1,177742083 cell wall and cell processes |
| Rv1362c | 2  | 1 | 1,177742083 cell wall and cell processes |
| Rv1481  | 2  | 1 | 1,177742083 cell wall and cell processes |
| Rv1490  | 2  | 1 | 1,177742083 cell wall and cell processes |
| Rv1667c | 2  | 1 | 1,177742083 cell wall and cell processes |
| Rv1668c | 2  | 1 | 1,177742083 cell wall and cell processes |
| Rv1747  | 2  | 1 | 1,177742083 cell wall and cell processes |
| Rv1884c | 2  | 1 | 1,177742083 cell wall and cell processes |
| Rv2051c | 2  | 1 | 1,177742083 cell wall and cell processes |
| Rv2154c | 2  | 1 | 1,177742083 cell wall and cell processes |
| Rv2155c | 2  | 1 | 1,177742083 cell wall and cell processes |

|         |    |   |                                          |
|---------|----|---|------------------------------------------|
| Rv2281  | 2  | 1 | 1,177742083 cell wall and cell processes |
| Rv2395  | 2  | 1 | 1,177742083 cell wall and cell processes |
| Rv2685  | 2  | 1 | 1,177742083 cell wall and cell processes |
| Rv2719c | 2  | 1 | 1,177742083 cell wall and cell processes |
| Rv2723  | 2  | 1 | 1,177742083 cell wall and cell processes |
| Rv2790c | 2  | 1 | 1,177742083 cell wall and cell processes |
| Rv2937  | 2  | 1 | 1,177742083 cell wall and cell processes |
| Rv2938  | 2  | 1 | 1,177742083 cell wall and cell processes |
| Rv3004  | 2  | 1 | 1,177742083 cell wall and cell processes |
| Rv3277  | 2  | 1 | 1,177742083 cell wall and cell processes |
| Rv3435c | 2  | 1 | 1,177742083 cell wall and cell processes |
| Rv3444c | 2  | 1 | 1,177742083 cell wall and cell processes |
| Rv3476c | 2  | 1 | 1,177742083 cell wall and cell processes |
| Rv3479  | 2  | 1 | 1,177742083 cell wall and cell processes |
| Rv3495c | 2  | 1 | 1,177742083 cell wall and cell processes |
| Rv3630  | 2  | 1 | 1,177742083 cell wall and cell processes |
| Rv3665c | 2  | 1 | 1,177742083 cell wall and cell processes |
| Rv3806c | 2  | 1 | 1,177742083 cell wall and cell processes |
| Rv3809c | 2  | 1 | 1,177742083 cell wall and cell processes |
| Rv3884c | 2  | 1 | 1,177742083 cell wall and cell processes |
| Rv3894c | 2  | 1 | 1,177742083 cell wall and cell processes |
| Rv2639c | 42 | 8 | 1,178860104 cell wall and cell processes |
| Rv0128  | 7  | 2 | 1,179167167 cell wall and cell processes |
| Rv0314c | 7  | 2 | 1,179167167 cell wall and cell processes |
| Rv1303  | 7  | 2 | 1,179167167 cell wall and cell processes |
| Rv1892  | 7  | 2 | 1,179167167 cell wall and cell processes |
| Rv1992c | 7  | 2 | 1,179167167 cell wall and cell processes |
| Rv2127  | 7  | 2 | 1,179167167 cell wall and cell processes |
| Rv2507  | 7  | 2 | 1,179167167 cell wall and cell processes |
| Rv2536  | 7  | 2 | 1,179167167 cell wall and cell processes |
| Rv2920c | 7  | 2 | 1,179167167 cell wall and cell processes |
| Rv3006  | 7  | 2 | 1,179167167 cell wall and cell processes |
| Rv3016  | 7  | 2 | 1,179167167 cell wall and cell processes |
| Rv3070  | 7  | 2 | 1,179167167 cell wall and cell processes |

|         |   |   |                                          |
|---------|---|---|------------------------------------------|
| Rv3355c | 7 | 2 | 1,179167167 cell wall and cell processes |
| Rv3483c | 7 | 2 | 1,179167167 cell wall and cell processes |
| Rv0008c | 3 | 1 | 1,180692338 cell wall and cell processes |
| Rv0037c | 3 | 1 | 1,180692338 cell wall and cell processes |
| Rv0113  | 3 | 1 | 1,180692338 cell wall and cell processes |
| Rv0114  | 3 | 1 | 1,180692338 cell wall and cell processes |
| Rv0173  | 3 | 1 | 1,180692338 cell wall and cell processes |
| Rv0265c | 3 | 1 | 1,180692338 cell wall and cell processes |
| Rv0394c | 3 | 1 | 1,180692338 cell wall and cell processes |
| Rv0403c | 3 | 1 | 1,180692338 cell wall and cell processes |
| Rv0411c | 3 | 1 | 1,180692338 cell wall and cell processes |
| Rv0463  | 3 | 1 | 1,180692338 cell wall and cell processes |
| Rv0473  | 3 | 1 | 1,180692338 cell wall and cell processes |
| Rv0488  | 3 | 1 | 1,180692338 cell wall and cell processes |
| Rv0522  | 3 | 1 | 1,180692338 cell wall and cell processes |
| Rv0538  | 3 | 1 | 1,180692338 cell wall and cell processes |
| Rv0556  | 3 | 1 | 1,180692338 cell wall and cell processes |
| Rv0622  | 3 | 1 | 1,180692338 cell wall and cell processes |
| Rv0928  | 3 | 1 | 1,180692338 cell wall and cell processes |
| Rv0933  | 3 | 1 | 1,180692338 cell wall and cell processes |
| Rv0936  | 3 | 1 | 1,180692338 cell wall and cell processes |
| Rv1008  | 3 | 1 | 1,180692338 cell wall and cell processes |
| Rv1009  | 3 | 1 | 1,180692338 cell wall and cell processes |
| Rv1159  | 3 | 1 | 1,180692338 cell wall and cell processes |
| Rv1200  | 3 | 1 | 1,180692338 cell wall and cell processes |
| Rv1233c | 3 | 1 | 1,180692338 cell wall and cell processes |
| Rv1235  | 3 | 1 | 1,180692338 cell wall and cell processes |
| Rv1237  | 3 | 1 | 1,180692338 cell wall and cell processes |
| Rv1270c | 3 | 1 | 1,180692338 cell wall and cell processes |
| Rv1435c | 3 | 1 | 1,180692338 cell wall and cell processes |
| Rv1614  | 3 | 1 | 1,180692338 cell wall and cell processes |
| Rv1902c | 3 | 1 | 1,180692338 cell wall and cell processes |
| Rv1984c | 3 | 1 | 1,180692338 cell wall and cell processes |
| Rv2038c | 3 | 1 | 1,180692338 cell wall and cell processes |

|         |   |   |                                          |
|---------|---|---|------------------------------------------|
| Rv2157c | 3 | 1 | 1,180692338 cell wall and cell processes |
| Rv2174  | 3 | 1 | 1,180692338 cell wall and cell processes |
| Rv2180c | 3 | 1 | 1,180692338 cell wall and cell processes |
| Rv2366c | 3 | 1 | 1,180692338 cell wall and cell processes |
| Rv2443  | 3 | 1 | 1,180692338 cell wall and cell processes |
| Rv2599  | 3 | 1 | 1,180692338 cell wall and cell processes |
| Rv2637  | 3 | 1 | 1,180692338 cell wall and cell processes |
| Rv2721c | 3 | 1 | 1,180692338 cell wall and cell processes |
| Rv3019c | 3 | 1 | 1,180692338 cell wall and cell processes |
| Rv3239c | 3 | 1 | 1,180692338 cell wall and cell processes |
| Rv3244c | 3 | 1 | 1,180692338 cell wall and cell processes |
| Rv3298c | 3 | 1 | 1,180692338 cell wall and cell processes |
| Rv3331  | 3 | 1 | 1,180692338 cell wall and cell processes |
| Rv3335c | 3 | 1 | 1,180692338 cell wall and cell processes |
| Rv3663c | 3 | 1 | 1,180692338 cell wall and cell processes |
| Rv3666c | 3 | 1 | 1,180692338 cell wall and cell processes |
| Rv3689  | 3 | 1 | 1,180692338 cell wall and cell processes |
| Rv3737  | 3 | 1 | 1,180692338 cell wall and cell processes |
| Rv3779  | 3 | 1 | 1,180692338 cell wall and cell processes |
| Rv3887c | 3 | 1 | 1,180692338 cell wall and cell processes |
| Rv3888c | 3 | 1 | 1,180692338 cell wall and cell processes |
| Rv0425c | 4 | 2 | 1,186675548 cell wall and cell processes |
| Rv0479c | 4 | 2 | 1,186675548 cell wall and cell processes |
| Rv0658c | 4 | 2 | 1,186675548 cell wall and cell processes |
| Rv0955  | 4 | 2 | 1,186675548 cell wall and cell processes |
| Rv1236  | 4 | 2 | 1,186675548 cell wall and cell processes |
| Rv1239c | 4 | 2 | 1,186675548 cell wall and cell processes |
| Rv1557  | 4 | 2 | 1,186675548 cell wall and cell processes |
| Rv1610  | 4 | 2 | 1,186675548 cell wall and cell processes |
| Rv2156c | 4 | 2 | 1,186675548 cell wall and cell processes |
| Rv2197c | 4 | 2 | 1,186675548 cell wall and cell processes |
| Rv2206  | 4 | 2 | 1,186675548 cell wall and cell processes |
| Rv2403c | 4 | 2 | 1,186675548 cell wall and cell processes |
| Rv2905  | 4 | 2 | 1,186675548 cell wall and cell processes |



|         |     |    |                                          |
|---------|-----|----|------------------------------------------|
| Rv3193c | 4   | 2  | 1,186675548 cell wall and cell processes |
| Rv3857c | 4   | 2  | 1,186675548 cell wall and cell processes |
| Rv3904c | 4   | 2  | 1,186675548 cell wall and cell processes |
| Rv3723  | 10  | 3  | 1,188374024 cell wall and cell processes |
| Rv2169c | 105 | 23 | 1,1997375 cell wall and cell processes   |
| Rv1987  | 11  | 3  | 1,205922974 cell wall and cell processes |
| Rv3641c | 11  | 3  | 1,205922974 cell wall and cell processes |
| Rv3782  | 11  | 3  | 1,205922974 cell wall and cell processes |
| Rv1302  | 13  | 2  | 1,215391325 cell wall and cell processes |
| Rv2903c | 13  | 2  | 1,215391325 cell wall and cell processes |
| Rv1615  | 17  | 3  | 1,251923802 cell wall and cell processes |
| Rv1749c | 19  | 3  | 1,254088199 cell wall and cell processes |
| Rv1926c | 19  | 3  | 1,254088199 cell wall and cell processes |
| Rv1197  | 18  | 5  | 1,25944725 cell wall and cell processes  |
| Rv3524  | 18  | 5  | 1,25944725 cell wall and cell processes  |
| Rv1174c | 79  | 17 | 1,264647641 cell wall and cell processes |
| Rv1110  | 19  | 5  | 1,267811055 cell wall and cell processes |
| Rv3880c | 25  | 5  | 1,296340815 cell wall and cell processes |
| Rv1198  | 27  | 5  | 1,297213359 cell wall and cell processes |
| Rv3869  | 27  | 5  | 1,297213359 cell wall and cell processes |
| Rv3870  | 27  | 7  | 1,305644632 cell wall and cell processes |
| Rv3610c | 30  | 6  | 1,312168518 cell wall and cell processes |
| Rv3843c | 31  | 8  | 1,320282587 cell wall and cell processes |
| Rv0615  | 32  | 8  | 1,325592196 cell wall and cell processes |
| Rv1811  | 39  | 8  | 1,339926939 cell wall and cell processes |
| Rv1274  | 47  | 12 | 1,362538931 cell wall and cell processes |
| Rv0986  | 8   | 1  | 1,56554878 cell wall and cell processes  |
| Rv2301  | 8   | 1  | 1,56554878 cell wall and cell processes  |
| Rv2668  | 8   | 1  | 1,56554878 cell wall and cell processes  |
| Rv3743c | 8   | 1  | 1,56554878 cell wall and cell processes  |
| Rv0178  | 7   | 1  | 1,56554878 cell wall and cell processes  |
| Rv0806c | 7   | 1  | 1,56554878 cell wall and cell processes  |
| Rv0917  | 7   | 1  | 1,56554878 cell wall and cell processes  |
| Rv1315  | 7   | 1  | 1,56554878 cell wall and cell processes  |

|         |    |   |                                         |
|---------|----|---|-----------------------------------------|
| Rv1616  | 7  | 1 | 1,56554878 cell wall and cell processes |
| Rv1845c | 7  | 1 | 1,56554878 cell wall and cell processes |
| Rv3041c | 7  | 1 | 1,56554878 cell wall and cell processes |
| Rv3200c | 7  | 1 | 1,56554878 cell wall and cell processes |
| Rv3437  | 7  | 1 | 1,56554878 cell wall and cell processes |
| Rv3889c | 7  | 1 | 1,56554878 cell wall and cell processes |
| Rv0235c | 6  | 1 | 1,56554878 cell wall and cell processes |
| Rv0361  | 6  | 1 | 1,56554878 cell wall and cell processes |
| Rv0671  | 12 | 2 | 1,56554878 cell wall and cell processes |
| Rv1139c | 6  | 1 | 1,56554878 cell wall and cell processes |
| Rv1166  | 6  | 1 | 1,56554878 cell wall and cell processes |
| Rv1708  | 6  | 1 | 1,56554878 cell wall and cell processes |
| Rv2361c | 6  | 1 | 1,56554878 cell wall and cell processes |
| Rv3020c | 6  | 1 | 1,56554878 cell wall and cell processes |
| Rv3036c | 6  | 1 | 1,56554878 cell wall and cell processes |
| Rv3265c | 6  | 1 | 1,56554878 cell wall and cell processes |
| Rv3270  | 6  | 1 | 1,56554878 cell wall and cell processes |
| Rv3576  | 6  | 1 | 1,56554878 cell wall and cell processes |
| Rv3724B | 6  | 1 | 1,56554878 cell wall and cell processes |
| Rv3821  | 6  | 1 | 1,56554878 cell wall and cell processes |
| Rv3877  | 11 | 2 | 1,56554878 cell wall and cell processes |
| Rv3917c | 11 | 2 | 1,56554878 cell wall and cell processes |
| Rv0016c | 5  | 1 | 1,56554878 cell wall and cell processes |
| Rv0420c | 10 | 2 | 1,56554878 cell wall and cell processes |
| Rv1101c | 5  | 1 | 1,56554878 cell wall and cell processes |
| Rv1216c | 5  | 1 | 1,56554878 cell wall and cell processes |
| Rv1859  | 5  | 1 | 1,56554878 cell wall and cell processes |
| Rv2075c | 5  | 1 | 1,56554878 cell wall and cell processes |
| Rv2199c | 5  | 1 | 1,56554878 cell wall and cell processes |
| Rv2203  | 5  | 1 | 1,56554878 cell wall and cell processes |
| Rv2459  | 5  | 1 | 1,56554878 cell wall and cell processes |
| Rv2518c | 10 | 2 | 1,56554878 cell wall and cell processes |
| Rv2553c | 15 | 3 | 1,56554878 cell wall and cell processes |
| Rv2873  | 5  | 1 | 1,56554878 cell wall and cell processes |

|         |    |   |                                         |
|---------|----|---|-----------------------------------------|
| Rv3102c | 5  | 1 | 1,56554878 cell wall and cell processes |
| Rv3162c | 5  | 1 | 1,56554878 cell wall and cell processes |
| Rv3781  | 5  | 1 | 1,56554878 cell wall and cell processes |
| Rv3895c | 5  | 1 | 1,56554878 cell wall and cell processes |
| Rv2576c | 19 | 4 | 1,56554878 cell wall and cell processes |
| Rv3890c | 33 | 7 | 1,56554878 cell wall and cell processes |
| Rv0010c | 9  | 2 | 1,56554878 cell wall and cell processes |
| Rv0347  | 18 | 4 | 1,56554878 cell wall and cell processes |
| Rv1411c | 9  | 2 | 1,56554878 cell wall and cell processes |
| Rv2053c | 27 | 6 | 1,56554878 cell wall and cell processes |
| Rv2145c | 18 | 4 | 1,56554878 cell wall and cell processes |
| Rv3240c | 18 | 4 | 1,56554878 cell wall and cell processes |
| Rv3802c | 18 | 4 | 1,56554878 cell wall and cell processes |
| Rv3810  | 9  | 2 | 1,56554878 cell wall and cell processes |
| Rv3905c | 9  | 2 | 1,56554878 cell wall and cell processes |
| Rv3868  | 40 | 9 | 1,56554878 cell wall and cell processes |
| Rv1784  | 22 | 5 | 1,56554878 cell wall and cell processes |
| Rv1782  | 39 | 9 | 1,56554878 cell wall and cell processes |
| Rv2209  | 17 | 4 | 1,56554878 cell wall and cell processes |
| Rv2400c | 21 | 5 | 1,56554878 cell wall and cell processes |
| Rv0426c | 33 | 8 | 1,56554878 cell wall and cell processes |
| Rv0179c | 4  | 1 | 1,56554878 cell wall and cell processes |
| Rv0180c | 4  | 1 | 1,56554878 cell wall and cell processes |
| Rv0191  | 8  | 2 | 1,56554878 cell wall and cell processes |
| Rv0225  | 4  | 1 | 1,56554878 cell wall and cell processes |
| Rv0537c | 4  | 1 | 1,56554878 cell wall and cell processes |
| Rv0593  | 4  | 1 | 1,56554878 cell wall and cell processes |
| Rv0666  | 4  | 1 | 1,56554878 cell wall and cell processes |
| Rv0783c | 4  | 1 | 1,56554878 cell wall and cell processes |
| Rv0838  | 4  | 1 | 1,56554878 cell wall and cell processes |
| Rv0899  | 4  | 1 | 1,56554878 cell wall and cell processes |
| Rv0988  | 4  | 1 | 1,56554878 cell wall and cell processes |
| Rv1249c | 8  | 2 | 1,56554878 cell wall and cell processes |
| Rv1250  | 4  | 1 | 1,56554878 cell wall and cell processes |

|         |    |   |                                         |
|---------|----|---|-----------------------------------------|
| Rv1275  | 12 | 3 | 1,56554878 cell wall and cell processes |
| Rv1363c | 8  | 2 | 1,56554878 cell wall and cell processes |
| Rv1410c | 12 | 3 | 1,56554878 cell wall and cell processes |
| Rv1418  | 4  | 1 | 1,56554878 cell wall and cell processes |
| Rv1522c | 4  | 1 | 1,56554878 cell wall and cell processes |
| Rv1648  | 4  | 1 | 1,56554878 cell wall and cell processes |
| Rv1888c | 8  | 2 | 1,56554878 cell wall and cell processes |
| Rv1910c | 12 | 3 | 1,56554878 cell wall and cell processes |
| Rv1922  | 4  | 1 | 1,56554878 cell wall and cell processes |
| Rv1979c | 4  | 1 | 1,56554878 cell wall and cell processes |
| Rv2163c | 4  | 1 | 1,56554878 cell wall and cell processes |
| Rv2345  | 4  | 1 | 1,56554878 cell wall and cell processes |
| Rv2767c | 4  | 1 | 1,56554878 cell wall and cell processes |
| Rv2921c | 4  | 1 | 1,56554878 cell wall and cell processes |
| Rv2936  | 8  | 2 | 1,56554878 cell wall and cell processes |
| Rv3064c | 4  | 1 | 1,56554878 cell wall and cell processes |
| Rv3101c | 4  | 1 | 1,56554878 cell wall and cell processes |
| Rv3194c | 4  | 1 | 1,56554878 cell wall and cell processes |
| Rv3434c | 4  | 1 | 1,56554878 cell wall and cell processes |
| Rv3481c | 4  | 1 | 1,56554878 cell wall and cell processes |
| Rv3604c | 4  | 1 | 1,56554878 cell wall and cell processes |
| Rv3619c | 8  | 2 | 1,56554878 cell wall and cell processes |
| Rv3808c | 4  | 1 | 1,56554878 cell wall and cell processes |
| Rv3848  | 4  | 1 | 1,56554878 cell wall and cell processes |
| Rv3918c | 4  | 1 | 1,56554878 cell wall and cell processes |
| Rv3921c | 12 | 3 | 1,56554878 cell wall and cell processes |
| Rv0039c | 2  | 0 | 1,56554878 cell wall and cell processes |
| Rv0110  | 3  | 0 | 1,56554878 cell wall and cell processes |
| Rv0112  | 3  | 0 | 1,56554878 cell wall and cell processes |
| Rv0192A | 0  | 0 | 1,56554878 cell wall and cell processes |
| Rv0194  | 2  | 0 | 1,56554878 cell wall and cell processes |
| Rv0200  | 2  | 0 | 1,56554878 cell wall and cell processes |
| Rv0203  | 0  | 0 | 1,56554878 cell wall and cell processes |
| Rv0204c | 2  | 0 | 1,56554878 cell wall and cell processes |

|         |   |   |                                         |
|---------|---|---|-----------------------------------------|
| Rv0205  | 2 | 0 | 1,56554878 cell wall and cell processes |
| Rv0219  | 1 | 0 | 1,56554878 cell wall and cell processes |
| Rv0226c | 0 | 0 | 1,56554878 cell wall and cell processes |
| Rv0236A | 4 | 0 | 1,56554878 cell wall and cell processes |
| Rv0236c | 2 | 0 | 1,56554878 cell wall and cell processes |
| Rv0237  | 1 | 0 | 1,56554878 cell wall and cell processes |
| Rv0246  | 2 | 0 | 1,56554878 cell wall and cell processes |
| Rv0261c | 1 | 0 | 1,56554878 cell wall and cell processes |
| Rv0267  | 1 | 0 | 1,56554878 cell wall and cell processes |
| Rv0318c | 0 | 0 | 1,56554878 cell wall and cell processes |
| Rv0320  | 1 | 0 | 1,56554878 cell wall and cell processes |
| Rv0344c | 2 | 0 | 1,56554878 cell wall and cell processes |
| Rv0359  | 2 | 0 | 1,56554878 cell wall and cell processes |
| Rv0362  | 1 | 0 | 1,56554878 cell wall and cell processes |
| Rv0402c | 1 | 0 | 1,56554878 cell wall and cell processes |
| Rv0450c | 3 | 0 | 1,56554878 cell wall and cell processes |
| Rv0482  | 2 | 0 | 1,56554878 cell wall and cell processes |
| Rv0497  | 3 | 0 | 1,56554878 cell wall and cell processes |
| Rv0507  | 1 | 0 | 1,56554878 cell wall and cell processes |
| Rv0513  | 2 | 0 | 1,56554878 cell wall and cell processes |
| Rv0514  | 1 | 0 | 1,56554878 cell wall and cell processes |
| Rv0528  | 1 | 0 | 1,56554878 cell wall and cell processes |
| Rv0531  | 4 | 0 | 1,56554878 cell wall and cell processes |
| Rv0544c | 0 | 0 | 1,56554878 cell wall and cell processes |
| Rv0585c | 1 | 0 | 1,56554878 cell wall and cell processes |
| Rv0603  | 1 | 0 | 1,56554878 cell wall and cell processes |
| Rv0633c | 3 | 0 | 1,56554878 cell wall and cell processes |
| Rv0713  | 4 | 0 | 1,56554878 cell wall and cell processes |
| Rv0774c | 0 | 0 | 1,56554878 cell wall and cell processes |
| Rv0779c | 1 | 0 | 1,56554878 cell wall and cell processes |
| Rv0817c | 1 | 0 | 1,56554878 cell wall and cell processes |
| Rv0820  | 3 | 0 | 1,56554878 cell wall and cell processes |
| Rv0879c | 1 | 0 | 1,56554878 cell wall and cell processes |
| Rv0882  | 1 | 0 | 1,56554878 cell wall and cell processes |

|         |   |   |                                         |
|---------|---|---|-----------------------------------------|
| Rv0908  | 1 | 0 | 1,56554878 cell wall and cell processes |
| Rv0929  | 1 | 0 | 1,56554878 cell wall and cell processes |
| Rv0962c | 1 | 0 | 1,56554878 cell wall and cell processes |
| Rv0987  | 4 | 0 | 1,56554878 cell wall and cell processes |
| Rv1022  | 1 | 0 | 1,56554878 cell wall and cell processes |
| Rv1024  | 1 | 0 | 1,56554878 cell wall and cell processes |
| Rv1028A | 0 | 0 | 1,56554878 cell wall and cell processes |
| Rv1030  | 1 | 0 | 1,56554878 cell wall and cell processes |
| Rv1031  | 1 | 0 | 1,56554878 cell wall and cell processes |
| Rv1075c | 2 | 0 | 1,56554878 cell wall and cell processes |
| Rv1081c | 2 | 0 | 1,56554878 cell wall and cell processes |
| Rv1087A | 3 | 0 | 1,56554878 cell wall and cell processes |
| Rv1097c | 2 | 0 | 1,56554878 cell wall and cell processes |
| Rv1218c | 1 | 0 | 1,56554878 cell wall and cell processes |
| Rv1252c | 2 | 0 | 1,56554878 cell wall and cell processes |
| Rv1269c | 1 | 0 | 1,56554878 cell wall and cell processes |
| Rv1271c | 1 | 0 | 1,56554878 cell wall and cell processes |
| Rv1273c | 0 | 0 | 1,56554878 cell wall and cell processes |
| Rv1282c | 1 | 0 | 1,56554878 cell wall and cell processes |
| Rv1291c | 0 | 0 | 1,56554878 cell wall and cell processes |
| Rv1371  | 0 | 0 | 1,56554878 cell wall and cell processes |
| Rv1431  | 1 | 0 | 1,56554878 cell wall and cell processes |
| Rv1433  | 2 | 0 | 1,56554878 cell wall and cell processes |
| Rv1456c | 1 | 0 | 1,56554878 cell wall and cell processes |
| Rv1457c | 2 | 0 | 1,56554878 cell wall and cell processes |
| Rv1459c | 1 | 0 | 1,56554878 cell wall and cell processes |
| Rv1469  | 0 | 0 | 1,56554878 cell wall and cell processes |
| Rv1491c | 4 | 0 | 1,56554878 cell wall and cell processes |
| Rv1496  | 3 | 0 | 1,56554878 cell wall and cell processes |
| Rv1508c | 1 | 0 | 1,56554878 cell wall and cell processes |
| Rv1517  | 2 | 0 | 1,56554878 cell wall and cell processes |
| Rv1565c | 2 | 0 | 1,56554878 cell wall and cell processes |
| Rv1567c | 2 | 0 | 1,56554878 cell wall and cell processes |
| Rv1635c | 2 | 0 | 1,56554878 cell wall and cell processes |

|         |   |   |                                         |
|---------|---|---|-----------------------------------------|
| Rv1698  | 2 | 0 | 1,56554878 cell wall and cell processes |
| Rv1704c | 2 | 0 | 1,56554878 cell wall and cell processes |
| Rv1730c | 1 | 0 | 1,56554878 cell wall and cell processes |
| Rv1735c | 0 | 0 | 1,56554878 cell wall and cell processes |
| Rv1739c | 0 | 0 | 1,56554878 cell wall and cell processes |
| Rv1758  | 2 | 0 | 1,56554878 cell wall and cell processes |
| Rv1761c | 1 | 0 | 1,56554878 cell wall and cell processes |
| Rv1819c | 1 | 0 | 1,56554878 cell wall and cell processes |
| Rv1841c | 1 | 0 | 1,56554878 cell wall and cell processes |
| Rv1858  | 1 | 0 | 1,56554878 cell wall and cell processes |
| Rv1881c | 2 | 0 | 1,56554878 cell wall and cell processes |
| Rv1903  | 1 | 0 | 1,56554878 cell wall and cell processes |
| Rv1920  | 4 | 0 | 1,56554878 cell wall and cell processes |
| Rv1946c | 1 | 0 | 1,56554878 cell wall and cell processes |
| Rv1970  | 2 | 0 | 1,56554878 cell wall and cell processes |
| Rv1972  | 1 | 0 | 1,56554878 cell wall and cell processes |
| Rv1973  | 0 | 0 | 1,56554878 cell wall and cell processes |
| Rv1974  | 0 | 0 | 1,56554878 cell wall and cell processes |
| Rv1999c | 0 | 0 | 1,56554878 cell wall and cell processes |
| Rv2060  | 0 | 0 | 1,56554878 cell wall and cell processes |
| Rv2080  | 4 | 0 | 1,56554878 cell wall and cell processes |
| Rv2113  | 1 | 0 | 1,56554878 cell wall and cell processes |
| Rv2151c | 2 | 0 | 1,56554878 cell wall and cell processes |
| Rv2164c | 2 | 0 | 1,56554878 cell wall and cell processes |
| Rv2171  | 1 | 0 | 1,56554878 cell wall and cell processes |
| Rv2223c | 2 | 0 | 1,56554878 cell wall and cell processes |
| Rv2235  | 4 | 0 | 1,56554878 cell wall and cell processes |
| Rv2253  | 0 | 0 | 1,56554878 cell wall and cell processes |
| Rv2265  | 1 | 0 | 1,56554878 cell wall and cell processes |
| Rv2270  | 3 | 0 | 1,56554878 cell wall and cell processes |
| Rv2273  | 0 | 0 | 1,56554878 cell wall and cell processes |
| Rv2306B | 1 | 0 | 1,56554878 cell wall and cell processes |
| Rv2316  | 1 | 0 | 1,56554878 cell wall and cell processes |
| Rv2317  | 1 | 0 | 1,56554878 cell wall and cell processes |

|         |   |   |                                         |
|---------|---|---|-----------------------------------------|
| Rv2318  | 1 | 0 | 1,56554878 cell wall and cell processes |
| Rv2320c | 1 | 0 | 1,56554878 cell wall and cell processes |
| Rv2330c | 0 | 0 | 1,56554878 cell wall and cell processes |
| Rv2339  | 3 | 0 | 1,56554878 cell wall and cell processes |
| Rv2341  | 2 | 0 | 1,56554878 cell wall and cell processes |
| Rv2401A | 2 | 0 | 1,56554878 cell wall and cell processes |
| Rv2473  | 4 | 0 | 1,56554878 cell wall and cell processes |
| Rv2508c | 2 | 0 | 1,56554878 cell wall and cell processes |
| Rv2520c | 4 | 0 | 1,56554878 cell wall and cell processes |
| Rv2543  | 1 | 0 | 1,56554878 cell wall and cell processes |
| Rv2544  | 1 | 0 | 1,56554878 cell wall and cell processes |
| Rv2560  | 3 | 0 | 1,56554878 cell wall and cell processes |
| Rv2571c | 0 | 0 | 1,56554878 cell wall and cell processes |
| Rv2597  | 2 | 0 | 1,56554878 cell wall and cell processes |
| Rv2600  | 1 | 0 | 1,56554878 cell wall and cell processes |
| Rv2684  | 3 | 0 | 1,56554878 cell wall and cell processes |
| Rv2700  | 0 | 0 | 1,56554878 cell wall and cell processes |
| Rv2748c | 3 | 0 | 1,56554878 cell wall and cell processes |
| Rv2796c | 1 | 0 | 1,56554878 cell wall and cell processes |
| Rv2806  | 4 | 0 | 1,56554878 cell wall and cell processes |
| Rv2832c | 0 | 0 | 1,56554878 cell wall and cell processes |
| Rv2833c | 1 | 0 | 1,56554878 cell wall and cell processes |
| Rv2834c | 0 | 0 | 1,56554878 cell wall and cell processes |
| Rv2835c | 3 | 0 | 1,56554878 cell wall and cell processes |
| Rv2843  | 2 | 0 | 1,56554878 cell wall and cell processes |
| Rv2864c | 1 | 0 | 1,56554878 cell wall and cell processes |
| Rv2911  | 0 | 0 | 1,56554878 cell wall and cell processes |
| Rv2972c | 3 | 0 | 1,56554878 cell wall and cell processes |
| Rv2980  | 0 | 0 | 1,56554878 cell wall and cell processes |
| Rv2981c | 2 | 0 | 1,56554878 cell wall and cell processes |
| Rv2999  | 0 | 0 | 1,56554878 cell wall and cell processes |
| Rv3163c | 2 | 0 | 1,56554878 cell wall and cell processes |
| Rv3253c | 1 | 0 | 1,56554878 cell wall and cell processes |
| Rv3278c | 1 | 0 | 1,56554878 cell wall and cell processes |



|         |    |    |                                         |
|---------|----|----|-----------------------------------------|
| Rv3310  | 1  | 0  | 1,56554878 cell wall and cell processes |
| Rv3330  | 1  | 0  | 1,56554878 cell wall and cell processes |
| Rv3332  | 0  | 0  | 1,56554878 cell wall and cell processes |
| Rv3390  | 1  | 0  | 1,56554878 cell wall and cell processes |
| Rv3395A | 0  | 0  | 1,56554878 cell wall and cell processes |
| Rv3447c | 1  | 0  | 1,56554878 cell wall and cell processes |
| Rv3448  | 0  | 0  | 1,56554878 cell wall and cell processes |
| Rv3452  | 1  | 0  | 1,56554878 cell wall and cell processes |
| Rv3453  | 1  | 0  | 1,56554878 cell wall and cell processes |
| Rv3454  | 2  | 0  | 1,56554878 cell wall and cell processes |
| Rv3482c | 2  | 0  | 1,56554878 cell wall and cell processes |
| Rv3578  | 0  | 0  | 1,56554878 cell wall and cell processes |
| Rv3587c | 2  | 0  | 1,56554878 cell wall and cell processes |
| Rv3635  | 4  | 0  | 1,56554878 cell wall and cell processes |
| Rv3657c | 0  | 0  | 1,56554878 cell wall and cell processes |
| Rv3664c | 1  | 0  | 1,56554878 cell wall and cell processes |
| Rv3690  | 2  | 0  | 1,56554878 cell wall and cell processes |
| Rv3693  | 0  | 0  | 1,56554878 cell wall and cell processes |
| Rv3789  | 4  | 0  | 1,56554878 cell wall and cell processes |
| Rv3793  | 0  | 0  | 1,56554878 cell wall and cell processes |
| Rv3794  | 0  | 0  | 1,56554878 cell wall and cell processes |
| Rv3795  | 1  | 0  | 1,56554878 cell wall and cell processes |
| Rv3805c | 3  | 0  | 1,56554878 cell wall and cell processes |
| Rv3835  | 4  | 0  | 1,56554878 cell wall and cell processes |
| Rv3851  | 1  | 0  | 1,56554878 cell wall and cell processes |
| Rv3885c | 1  | 0  | 1,56554878 cell wall and cell processes |
| Rv3901c | 3  | 0  | 1,56554878 cell wall and cell processes |
| Rv2659c | 23 | 0  | 0,165724444 insertion seqs and phages   |
| Rv2792c | 8  | 7  | 0,174733036 insertion seqs and phages   |
| Rv1055  | 7  | 6  | 0,261885 insertion seqs and phages      |
| Rv1577c | 37 | 17 | 0,330806857 insertion seqs and phages   |
| Rv0829  | 0  | 2  | 0,334966855 insertion seqs and phages   |
| Rv2654c | 0  | 2  | 0,334966855 insertion seqs and phages   |
| Rv1584c | 32 | 2  | 0,403010379 insertion seqs and phages   |

|         |    |   |                                       |
|---------|----|---|---------------------------------------|
| Rv1574  | 1  | 2 | 0,643390112 insertion seqs and phages |
| Rv2355  | 1  | 2 | 0,643390112 insertion seqs and phages |
| Rv3184  | 9  | 5 | 0,879377032 insertion seqs and phages |
| Rv0031  | 0  | 1 | 0,891983427 insertion seqs and phages |
| Rv1575  | 0  | 1 | 0,891983427 insertion seqs and phages |
| Rv2086  | 0  | 1 | 0,891983427 insertion seqs and phages |
| Rv2810c | 0  | 1 | 0,891983427 insertion seqs and phages |
| Rv2814c | 0  | 1 | 0,891983427 insertion seqs and phages |
| Rv1054  | 2  | 2 | 0,902076825 insertion seqs and phages |
| Rv1128c | 2  | 2 | 0,902076825 insertion seqs and phages |
| Rv2278  | 11 | 5 | 0,915485005 insertion seqs and phages |
| Rv1578c | 8  | 0 | 0,980645136 insertion seqs and phages |
| Rv1585c | 8  | 0 | 0,980645136 insertion seqs and phages |
| Rv1583c | 3  | 2 | 1,017645149 insertion seqs and phages |
| Rv2168c | 3  | 2 | 1,017645149 insertion seqs and phages |
| Rv2885c | 3  | 2 | 1,017645149 insertion seqs and phages |
| Rv2354  | 6  | 3 | 1,023060102 insertion seqs and phages |
| Rv0922  | 9  | 4 | 1,090043564 insertion seqs and phages |
| Rv2648  | 9  | 4 | 1,090043564 insertion seqs and phages |
| Rv3474  | 9  | 4 | 1,090043564 insertion seqs and phages |
| Rv1580c | 6  | 0 | 1,107198572 insertion seqs and phages |
| Rv1042c | 5  | 2 | 1,132270883 insertion seqs and phages |
| Rv3827c | 5  | 2 | 1,132270883 insertion seqs and phages |
| Rv0795  | 8  | 3 | 1,143564814 insertion seqs and phages |
| Rv1763  | 8  | 3 | 1,143564814 insertion seqs and phages |
| Rv0605  | 6  | 2 | 1,154704835 insertion seqs and phages |
| Rv2085  | 6  | 2 | 1,154704835 insertion seqs and phages |
| Rv2666  | 6  | 2 | 1,154704835 insertion seqs and phages |
| Rv3348  | 6  | 2 | 1,154704835 insertion seqs and phages |
| Rv3798  | 6  | 2 | 1,154704835 insertion seqs and phages |
| Rv0606  | 1  | 1 | 1,155519357 insertion seqs and phages |
| Rv1573  | 1  | 1 | 1,155519357 insertion seqs and phages |
| Rv1701  | 1  | 1 | 1,155519357 insertion seqs and phages |
| Rv1756c | 1  | 1 | 1,155519357 insertion seqs and phages |

|         |    |    |                                       |
|---------|----|----|---------------------------------------|
| Rv2646  | 1  | 1  | 1,155519357 insertion seqs and phages |
| Rv2649  | 1  | 1  | 1,155519357 insertion seqs and phages |
| Rv2943A | 1  | 1  | 1,155519357 insertion seqs and phages |
| Rv2978c | 1  | 1  | 1,155519357 insertion seqs and phages |
| Rv3023c | 1  | 1  | 1,155519357 insertion seqs and phages |
| Rv3185  | 1  | 1  | 1,155519357 insertion seqs and phages |
| Rv3431c | 1  | 1  | 1,155519357 insertion seqs and phages |
| Rv3637  | 1  | 1  | 1,155519357 insertion seqs and phages |
| Rv0755A | 76 | 16 | 1,166342553 insertion seqs and phages |
| Rv2087  | 10 | 1  | 1,169814587 insertion seqs and phages |
| Rv2658c | 9  | 1  | 1,171820425 insertion seqs and phages |
| Rv3751  | 9  | 1  | 1,171820425 insertion seqs and phages |
| Rv3325  | 9  | 3  | 1,175481928 insertion seqs and phages |
| Rv0796  | 2  | 1  | 1,177742083 insertion seqs and phages |
| Rv0797  | 2  | 1  | 1,177742083 insertion seqs and phages |
| Rv1199c | 2  | 1  | 1,177742083 insertion seqs and phages |
| Rv1764  | 2  | 1  | 1,177742083 insertion seqs and phages |
| Rv2106  | 2  | 1  | 1,177742083 insertion seqs and phages |
| Rv2177c | 2  | 1  | 1,177742083 insertion seqs and phages |
| Rv2279  | 2  | 1  | 1,177742083 insertion seqs and phages |
| Rv2424c | 2  | 1  | 1,177742083 insertion seqs and phages |
| Rv2512c | 2  | 1  | 1,177742083 insertion seqs and phages |
| Rv2943  | 2  | 1  | 1,177742083 insertion seqs and phages |
| Rv3187  | 2  | 1  | 1,177742083 insertion seqs and phages |
| Rv3326  | 2  | 1  | 1,177742083 insertion seqs and phages |
| Rv3381c | 2  | 1  | 1,177742083 insertion seqs and phages |
| Rv3386  | 2  | 1  | 1,177742083 insertion seqs and phages |
| Rv3427c | 2  | 1  | 1,177742083 insertion seqs and phages |
| Rv0921  | 34 | 6  | 1,178460025 insertion seqs and phages |
| Rv0515  | 7  | 2  | 1,179167167 insertion seqs and phages |
| Rv2105  | 7  | 2  | 1,179167167 insertion seqs and phages |
| Rv3844  | 7  | 2  | 1,179167167 insertion seqs and phages |
| Rv1370c | 3  | 1  | 1,180692338 insertion seqs and phages |
| Rv1588c | 3  | 1  | 1,180692338 insertion seqs and phages |

|         |    |    |                                       |
|---------|----|----|---------------------------------------|
| Rv2309c | 3  | 1  | 1,180692338 insertion seqs and phages |
| Rv2652c | 3  | 1  | 1,180692338 insertion seqs and phages |
| Rv2815c | 3  | 1  | 1,180692338 insertion seqs and phages |
| Rv2979c | 3  | 1  | 1,180692338 insertion seqs and phages |
| Rv3430c | 3  | 1  | 1,180692338 insertion seqs and phages |
| Rv1945  | 4  | 2  | 1,186675548 insertion seqs and phages |
| Rv2480c | 4  | 2  | 1,186675548 insertion seqs and phages |
| Rv3828c | 10 | 3  | 1,188374024 insertion seqs and phages |
| Rv1041c | 11 | 3  | 1,205922974 insertion seqs and phages |
| Rv3770B | 11 | 3  | 1,205922974 insertion seqs and phages |
| Rv3636  | 36 | 9  | 1,337612538 insertion seqs and phages |
| Rv1149  | 68 | 17 | 1,395654615 insertion seqs and phages |
| Rv2655c | 8  | 1  | 1,56554878 insertion seqs and phages  |
| Rv0336  | 7  | 1  | 1,56554878 insertion seqs and phages  |
| Rv2653c | 7  | 1  | 1,56554878 insertion seqs and phages  |
| Rv0920c | 5  | 1  | 1,56554878 insertion seqs and phages  |
| Rv1047  | 5  | 1  | 1,56554878 insertion seqs and phages  |
| Rv0741  | 9  | 2  | 1,56554878 insertion seqs and phages  |
| Rv1148c | 4  | 1  | 1,56554878 insertion seqs and phages  |
| Rv1757c | 4  | 1  | 1,56554878 insertion seqs and phages  |
| Rv2656c | 8  | 2  | 1,56554878 insertion seqs and phages  |
| Rv2886c | 4  | 1  | 1,56554878 insertion seqs and phages  |
| Rv3115  | 4  | 1  | 1,56554878 insertion seqs and phages  |
| Rv3186  | 8  | 2  | 1,56554878 insertion seqs and phages  |
| Rv3466  | 8  | 2  | 1,56554878 insertion seqs and phages  |
| Rv0094c | 1  | 0  | 1,56554878 insertion seqs and phages  |
| Rv0095c | 3  | 0  | 1,56554878 insertion seqs and phages  |
| Rv0393  | 0  | 0  | 1,56554878 insertion seqs and phages  |
| Rv0397  | 1  | 0  | 1,56554878 insertion seqs and phages  |
| Rv0850  | 4  | 0  | 1,56554878 insertion seqs and phages  |
| Rv1034c | 0  | 0  | 1,56554878 insertion seqs and phages  |
| Rv1035c | 1  | 0  | 1,56554878 insertion seqs and phages  |
| Rv1036c | 4  | 0  | 1,56554878 insertion seqs and phages  |
| Rv1313c | 2  | 0  | 1,56554878 insertion seqs and phages  |

|         |     |    |                                      |
|---------|-----|----|--------------------------------------|
| Rv1369c | 1   | 0  | 1,56554878 insertion seqs and phages |
| Rv1579c | 1   | 0  | 1,56554878 insertion seqs and phages |
| Rv1581c | 0   | 0  | 1,56554878 insertion seqs and phages |
| Rv1582c | 4   | 0  | 1,56554878 insertion seqs and phages |
| Rv1587c | 0   | 0  | 1,56554878 insertion seqs and phages |
| Rv1702c | 0   | 0  | 1,56554878 insertion seqs and phages |
| Rv1765A | 3   | 0  | 1,56554878 insertion seqs and phages |
| Rv2013  | 2   | 0  | 1,56554878 insertion seqs and phages |
| Rv2014  | 1   | 0  | 1,56554878 insertion seqs and phages |
| Rv2100  | 0   | 0  | 1,56554878 insertion seqs and phages |
| Rv2167c | 1   | 0  | 1,56554878 insertion seqs and phages |
| Rv2310  | 0   | 0  | 1,56554878 insertion seqs and phages |
| Rv2479c | 1   | 0  | 1,56554878 insertion seqs and phages |
| Rv2647  | 2   | 0  | 1,56554878 insertion seqs and phages |
| Rv2812  | 1   | 0  | 1,56554878 insertion seqs and phages |
| Rv2894c | 2   | 0  | 1,56554878 insertion seqs and phages |
| Rv2944  | 1   | 0  | 1,56554878 insertion seqs and phages |
| Rv2961  | 0   | 0  | 1,56554878 insertion seqs and phages |
| Rv3191c | 0   | 0  | 1,56554878 insertion seqs and phages |
| Rv3327  | 1   | 0  | 1,56554878 insertion seqs and phages |
| Rv3349c | 1   | 0  | 1,56554878 insertion seqs and phages |
| Rv3380c | 1   | 0  | 1,56554878 insertion seqs and phages |
| Rv3387  | 1   | 0  | 1,56554878 insertion seqs and phages |
| Rv3428c | 2   | 0  | 1,56554878 insertion seqs and phages |
| Rv3467  | 2   | 0  | 1,56554878 insertion seqs and phages |
| Rv3475  | 2   | 0  | 1,56554878 insertion seqs and phages |
| Rv3638  | 0   | 0  | 1,56554878 insertion seqs and phages |
| Rv3640c | 1   | 0  | 1,56554878 insertion seqs and phages |
| Rv3770A | 1   | 0  | 1,56554878 insertion seqs and phages |
| Rv3136  | 2   | 5  | 0,060235783 PE/PPE                   |
| Rv0872c | 12  | 10 | 0,068692536 PE/PPE                   |
| Rv1790  | 1   | 4  | 0,080382111 PE/PPE                   |
| Rv0297  | 5   | 6  | 0,121545602 PE/PPE                   |
| Rv3872  | 171 | 24 | 0,131697647 PE/PPE                   |

|         |    |    |                    |
|---------|----|----|--------------------|
| Rv1361c | 2  | 4  | 0,176306516 PE/PPE |
| Rv1195  | 1  | 3  | 0,257111256 PE/PPE |
| Rv0754  | 27 | 1  | 0,286143448 PE/PPE |
| Rv0747  | 3  | 4  | 0,292939524 PE/PPE |
| Rv3135  | 0  | 2  | 0,334966855 PE/PPE |
| Rv1196  | 4  | 4  | 0,413484436 PE/PPE |
| Rv1039c | 2  | 3  | 0,422118767 PE/PPE |
| Rv1468c | 2  | 3  | 0,422118767 PE/PPE |
| Rv1396c | 5  | 4  | 0,552732111 PE/PPE |
| Rv1387  | 42 | 4  | 0,618188848 PE/PPE |
| Rv1087  | 1  | 2  | 0,643390112 PE/PPE |
| Rv1706c | 1  | 2  | 0,643390112 PE/PPE |
| Rv1818c | 1  | 2  | 0,643390112 PE/PPE |
| Rv1441c | 0  | 1  | 0,891983427 PE/PPE |
| Rv3429  | 24 | 2  | 0,894319255 PE/PPE |
| Rv0916c | 2  | 2  | 0,902076825 PE/PPE |
| Rv1787  | 2  | 2  | 0,902076825 PE/PPE |
| Rv1983  | 2  | 2  | 0,902076825 PE/PPE |
| Rv3022A | 9  | 0  | 0,932297131 PE/PPE |
| Rv0834c | 13 | 5  | 0,979843859 PE/PPE |
| Rv3533c | 8  | 0  | 0,980645136 PE/PPE |
| Rv3425  | 11 | 1  | 1,032354536 PE/PPE |
| Rv2162c | 9  | 4  | 1,090043564 PE/PPE |
| Rv3159c | 5  | 0  | 1,093861497 PE/PPE |
| Rv1808  | 90 | 24 | 1,123077042 PE/PPE |
| Rv1768  | 5  | 2  | 1,132270883 PE/PPE |
| Rv0755c | 26 | 3  | 1,137295177 PE/PPE |
| Rv2352c | 28 | 5  | 1,139755146 PE/PPE |
| Rv1801  | 35 | 11 | 1,142451131 PE/PPE |
| Rv1646  | 8  | 3  | 1,143564814 PE/PPE |
| Rv2519  | 15 | 2  | 1,146799395 PE/PPE |
| Rv3595c | 6  | 2  | 1,154704835 PE/PPE |
| Rv0159c | 1  | 1  | 1,155519357 PE/PPE |
| Rv0742  | 1  | 1  | 1,155519357 PE/PPE |

|         |    |    |                    |
|---------|----|----|--------------------|
| Rv0915c | 1  | 1  | 1,155519357 PE/PPE |
| Rv2123  | 1  | 1  | 1,155519357 PE/PPE |
| Rv2608  | 1  | 1  | 1,155519357 PE/PPE |
| Rv2741  | 1  | 1  | 1,155519357 PE/PPE |
| Rv3652  | 1  | 1  | 1,155519357 PE/PPE |
| Rv2356c | 10 | 1  | 1,169814587 PE/PPE |
| Rv0256c | 2  | 1  | 1,177742083 PE/PPE |
| Rv1651c | 2  | 1  | 1,177742083 PE/PPE |
| Rv2328  | 2  | 1  | 1,177742083 PE/PPE |
| Rv2371  | 2  | 1  | 1,177742083 PE/PPE |
| Rv2634c | 2  | 1  | 1,177742083 PE/PPE |
| Rv3125c | 2  | 1  | 1,177742083 PE/PPE |
| Rv3367  | 2  | 1  | 1,177742083 PE/PPE |
| Rv3532  | 2  | 1  | 1,177742083 PE/PPE |
| Rv3739c | 2  | 1  | 1,177742083 PE/PPE |
| Rv3892c | 2  | 1  | 1,177742083 PE/PPE |
| Rv0832  | 3  | 1  | 1,180692338 PE/PPE |
| Rv2108  | 3  | 1  | 1,180692338 PE/PPE |
| Rv2892c | 3  | 1  | 1,180692338 PE/PPE |
| Rv3022c | 3  | 1  | 1,180692338 PE/PPE |
| Rv3144c | 3  | 1  | 1,180692338 PE/PPE |
| Rv3426  | 3  | 1  | 1,180692338 PE/PPE |
| Rv3893c | 3  | 1  | 1,180692338 PE/PPE |
| Rv2340c | 4  | 2  | 1,186675548 PE/PPE |
| Rv3539  | 4  | 2  | 1,186675548 PE/PPE |
| Rv1802  | 13 | 4  | 1,218883666 PE/PPE |
| Rv3746c | 15 | 4  | 1,243303357 PE/PPE |
| Rv1809  | 51 | 11 | 1,367661503 PE/PPE |
| Rv3347c | 8  | 1  | 1,56554878 PE/PPE  |
| Rv3097c | 12 | 2  | 1,56554878 PE/PPE  |
| Rv1800  | 11 | 2  | 1,56554878 PE/PPE  |
| Rv3021c | 10 | 2  | 1,56554878 PE/PPE  |
| Rv1172c | 13 | 3  | 1,56554878 PE/PPE  |
| Rv0578c | 4  | 1  | 1,56554878 PE/PPE  |

|         |   |   |                   |
|---------|---|---|-------------------|
| Rv1803c | 4 | 1 | 1,56554878 PE/PPE |
| Rv2615c | 4 | 1 | 1,56554878 PE/PPE |
| Rv2768c | 4 | 1 | 1,56554878 PE/PPE |
| Rv3018c | 8 | 2 | 1,56554878 PE/PPE |
| Rv0096  | 1 | 0 | 1,56554878 PE/PPE |
| Rv0109  | 0 | 0 | 1,56554878 PE/PPE |
| Rv0124  | 0 | 0 | 1,56554878 PE/PPE |
| Rv0151c | 1 | 0 | 1,56554878 PE/PPE |
| Rv0152c | 1 | 0 | 1,56554878 PE/PPE |
| Rv0160c | 0 | 0 | 1,56554878 PE/PPE |
| Rv0278c | 0 | 0 | 1,56554878 PE/PPE |
| Rv0279c | 0 | 0 | 1,56554878 PE/PPE |
| Rv0304c | 1 | 0 | 1,56554878 PE/PPE |
| Rv0305c | 2 | 0 | 1,56554878 PE/PPE |
| Rv0335c | 1 | 0 | 1,56554878 PE/PPE |
| Rv0354c | 1 | 0 | 1,56554878 PE/PPE |
| Rv0355c | 1 | 0 | 1,56554878 PE/PPE |
| Rv0388c | 1 | 0 | 1,56554878 PE/PPE |
| Rv0442c | 1 | 0 | 1,56554878 PE/PPE |
| Rv0453  | 1 | 0 | 1,56554878 PE/PPE |
| Rv0532  | 2 | 0 | 1,56554878 PE/PPE |
| Rv0746  | 0 | 0 | 1,56554878 PE/PPE |
| Rv0833  | 1 | 0 | 1,56554878 PE/PPE |
| Rv0878c | 2 | 0 | 1,56554878 PE/PPE |
| Rv0977  | 1 | 0 | 1,56554878 PE/PPE |
| Rv0978c | 2 | 0 | 1,56554878 PE/PPE |
| Rv0980c | 3 | 0 | 1,56554878 PE/PPE |
| Rv1040c | 1 | 0 | 1,56554878 PE/PPE |
| Rv1067c | 0 | 0 | 1,56554878 PE/PPE |
| Rv1068c | 0 | 0 | 1,56554878 PE/PPE |
| Rv1088  | 0 | 0 | 1,56554878 PE/PPE |
| Rv1089  | 1 | 0 | 1,56554878 PE/PPE |
| Rv1091  | 1 | 0 | 1,56554878 PE/PPE |
| Rv1135c | 1 | 0 | 1,56554878 PE/PPE |



|         |   |   |                   |
|---------|---|---|-------------------|
| Rv1214c | 1 | 0 | 1,56554878 PE/PPE |
| Rv1243c | 0 | 0 | 1,56554878 PE/PPE |
| Rv1325c | 0 | 0 | 1,56554878 PE/PPE |
| Rv1430  | 1 | 0 | 1,56554878 PE/PPE |
| Rv1450c | 0 | 0 | 1,56554878 PE/PPE |
| Rv1452c | 0 | 0 | 1,56554878 PE/PPE |
| Rv1548c | 2 | 0 | 1,56554878 PE/PPE |
| Rv1705c | 3 | 0 | 1,56554878 PE/PPE |
| Rv1753c | 1 | 0 | 1,56554878 PE/PPE |
| Rv1759c | 1 | 0 | 1,56554878 PE/PPE |
| Rv1788  | 0 | 0 | 1,56554878 PE/PPE |
| Rv1840c | 0 | 0 | 1,56554878 PE/PPE |
| Rv1917c | 1 | 0 | 1,56554878 PE/PPE |
| Rv1918c | 1 | 0 | 1,56554878 PE/PPE |
| Rv2107  | 3 | 0 | 1,56554878 PE/PPE |
| Rv2126c | 0 | 0 | 1,56554878 PE/PPE |
| Rv2353c | 2 | 0 | 1,56554878 PE/PPE |
| Rv2408  | 0 | 0 | 1,56554878 PE/PPE |
| Rv2487c | 1 | 0 | 1,56554878 PE/PPE |
| Rv2490c | 0 | 0 | 1,56554878 PE/PPE |
| Rv2591  | 2 | 0 | 1,56554878 PE/PPE |
| Rv2769c | 2 | 0 | 1,56554878 PE/PPE |
| Rv2770c | 3 | 0 | 1,56554878 PE/PPE |
| Rv2853  | 1 | 0 | 1,56554878 PE/PPE |
| Rv3343c | 2 | 0 | 1,56554878 PE/PPE |
| Rv3344c | 0 | 0 | 1,56554878 PE/PPE |
| Rv3345c | 0 | 0 | 1,56554878 PE/PPE |
| Rv3350c | 3 | 0 | 1,56554878 PE/PPE |
| Rv3388  | 0 | 0 | 1,56554878 PE/PPE |
| Rv3507  | 1 | 0 | 1,56554878 PE/PPE |
| Rv3508  | 0 | 0 | 1,56554878 PE/PPE |
| Rv3511  | 0 | 0 | 1,56554878 PE/PPE |
| Rv3512  | 0 | 0 | 1,56554878 PE/PPE |
| Rv3514  | 1 | 0 | 1,56554878 PE/PPE |

|         |     |    |                                                     |
|---------|-----|----|-----------------------------------------------------|
| Rv3558  | 2   | 0  | 1,56554878 PE/PPE                                   |
| Rv3590c | 0   | 0  | 1,56554878 PE/PPE                                   |
| Rv3621c | 1   | 0  | 1,56554878 PE/PPE                                   |
| Rv3622c | 2   | 0  | 1,56554878 PE/PPE                                   |
| Rv3650  | 2   | 0  | 1,56554878 PE/PPE                                   |
| Rv3653  | 1   | 0  | 1,56554878 PE/PPE                                   |
| Rv3738c | 1   | 0  | 1,56554878 PE/PPE                                   |
| Rv3812  | 0   | 0  | 1,56554878 PE/PPE                                   |
| Rv3569c | 48  | 2  | 0,05296113 intermediary metabolism and respiration  |
| Rv0186  | 2   | 5  | 0,060235783 intermediary metabolism and respiration |
| Rv1900c | 2   | 5  | 0,060235783 intermediary metabolism and respiration |
| Rv2029c | 2   | 5  | 0,060235783 intermediary metabolism and respiration |
| Rv1872c | 102 | 42 | 0,06169207 intermediary metabolism and respiration  |
| Rv0382c | 75  | 6  | 0,063666893 intermediary metabolism and respiration |
| Rv3003c | 12  | 10 | 0,068692536 intermediary metabolism and respiration |
| Rv3536c | 45  | 2  | 0,070017646 intermediary metabolism and respiration |
| Rv1895  | 46  | 2  | 0,071938739 intermediary metabolism and respiration |
| Rv0575c | 26  | 0  | 0,07512953 intermediary metabolism and respiration  |
| Rv2463  | 4   | 6  | 0,075179176 intermediary metabolism and respiration |
| Rv0764c | 36  | 1  | 0,079106026 intermediary metabolism and respiration |
| Rv3290c | 111 | 12 | 0,079174853 intermediary metabolism and respiration |
| Rv0768  | 34  | 1  | 0,112805173 intermediary metabolism and respiration |
| Rv1295  | 3   | 5  | 0,113238456 intermediary metabolism and respiration |
| Rv1736c | 3   | 5  | 0,113238456 intermediary metabolism and respiration |
| Rv3684  | 3   | 5  | 0,113238456 intermediary metabolism and respiration |
| Rv3340  | 7   | 7  | 0,120728181 intermediary metabolism and respiration |
| Rv3858c | 7   | 7  | 0,120728181 intermediary metabolism and respiration |
| Rv0247c | 40  | 2  | 0,131843776 intermediary metabolism and respiration |
| Rv0989c | 31  | 1  | 0,158739769 intermediary metabolism and respiration |
| Rv3043c | 14  | 10 | 0,178201429 intermediary metabolism and respiration |
| Rv2883c | 4   | 5  | 0,191150027 intermediary metabolism and respiration |
| Rv1296  | 23  | 13 | 0,198662011 intermediary metabolism and respiration |
| Rv1162  | 15  | 10 | 0,200643368 intermediary metabolism and respiration |
| Rv1264  | 11  | 8  | 0,209271414 intermediary metabolism and respiration |

|         |     |    |                                                     |
|---------|-----|----|-----------------------------------------------------|
| Rv1990A | 11  | 8  | 0,209271414 intermediary metabolism and respiration |
| Rv2332  | 11  | 8  | 0,209271414 intermediary metabolism and respiration |
| Rv2496c | 55  | 24 | 0,227903773 intermediary metabolism and respiration |
| Rv3161c | 21  | 0  | 0,236027074 intermediary metabolism and respiration |
| Rv2291  | 16  | 10 | 0,238137275 intermediary metabolism and respiration |
| Rv0291  | 1   | 3  | 0,257111256 intermediary metabolism and respiration |
| Rv1692  | 1   | 3  | 0,257111256 intermediary metabolism and respiration |
| Rv3778c | 7   | 6  | 0,261885 intermediary metabolism and respiration    |
| Rv2495c | 17  | 10 | 0,276916998 intermediary metabolism and respiration |
| Rv0994  | 5   | 5  | 0,286174169 intermediary metabolism and respiration |
| Rv2888c | 5   | 5  | 0,286174169 intermediary metabolism and respiration |
| Rv1127c | 3   | 4  | 0,292939524 intermediary metabolism and respiration |
| Rv3025c | 3   | 4  | 0,292939524 intermediary metabolism and respiration |
| Rv1223  | 111 | 15 | 0,299257039 intermediary metabolism and respiration |
| Rv3571  | 34  | 2  | 0,312911171 intermediary metabolism and respiration |
| Rv3568c | 41  | 3  | 0,318762337 intermediary metabolism and respiration |
| Rv1596  | 35  | 2  | 0,318806532 intermediary metabolism and respiration |
| Rv1177  | 52  | 22 | 0,328205751 intermediary metabolism and respiration |
| Rv1464  | 8   | 6  | 0,33098 intermediary metabolism and respiration     |
| Rv1542c | 0   | 2  | 0,334966855 intermediary metabolism and respiration |
| Rv0793  | 25  | 1  | 0,378950526 intermediary metabolism and respiration |
| Rv2124c | 6   | 5  | 0,380970124 intermediary metabolism and respiration |
| Rv3725  | 6   | 5  | 0,380970124 intermediary metabolism and respiration |
| Rv1876  | 39  | 3  | 0,403390782 intermediary metabolism and respiration |
| Rv0509  | 22  | 11 | 0,404187525 intermediary metabolism and respiration |
| Rv2682c | 9   | 6  | 0,411415431 intermediary metabolism and respiration |
| Rv0958  | 4   | 4  | 0,413484436 intermediary metabolism and respiration |
| Rv1699  | 4   | 4  | 0,413484436 intermediary metabolism and respiration |
| Rv2221c | 4   | 4  | 0,413484436 intermediary metabolism and respiration |
| Rv1937  | 16  | 0  | 0,415839554 intermediary metabolism and respiration |
| Rv0646c | 2   | 3  | 0,422118767 intermediary metabolism and respiration |
| Rv0952  | 2   | 3  | 0,422118767 intermediary metabolism and respiration |
| Rv1988  | 2   | 3  | 0,422118767 intermediary metabolism and respiration |
| Rv3275c | 2   | 3  | 0,422118767 intermediary metabolism and respiration |

|         |    |    |                                                     |
|---------|----|----|-----------------------------------------------------|
| Rv3708c | 2  | 3  | 0,422118767 intermediary metabolism and respiration |
| Rv1335  | 17 | 0  | 0,439275046 intermediary metabolism and respiration |
| Rv3913  | 49 | 5  | 0,447635572 intermediary metabolism and respiration |
| Rv2949c | 20 | 10 | 0,480500074 intermediary metabolism and respiration |
| Rv0788  | 7  | 5  | 0,485900548 intermediary metabolism and respiration |
| Rv1631  | 7  | 5  | 0,485900548 intermediary metabolism and respiration |
| Rv3389c | 7  | 5  | 0,485900548 intermediary metabolism and respiration |
| Rv1161  | 41 | 17 | 0,486944714 intermediary metabolism and respiration |
| Rv0766c | 23 | 1  | 0,499526963 intermediary metabolism and respiration |
| Rv3119  | 31 | 2  | 0,530802522 intermediary metabolism and respiration |
| Rv2763c | 12 | 7  | 0,538915113 intermediary metabolism and respiration |
| Rv3520c | 12 | 7  | 0,538915113 intermediary metabolism and respiration |
| Rv0208c | 5  | 4  | 0,552732111 intermediary metabolism and respiration |
| Rv1712  | 5  | 4  | 0,552732111 intermediary metabolism and respiration |
| Rv2217  | 5  | 4  | 0,552732111 intermediary metabolism and respiration |
| Rv1300  | 58 | 7  | 0,589487538 intermediary metabolism and respiration |
| Rv1256c | 14 | 0  | 0,602437508 intermediary metabolism and respiration |
| Rv2391  | 20 | 1  | 0,616502504 intermediary metabolism and respiration |
| Rv3547  | 20 | 1  | 0,616502504 intermediary metabolism and respiration |
| Rv0303  | 27 | 2  | 0,616807692 intermediary metabolism and respiration |
| Rv3502c | 27 | 2  | 0,616807692 intermediary metabolism and respiration |
| Rv3534c | 27 | 2  | 0,616807692 intermediary metabolism and respiration |
| Rv2606c | 10 | 6  | 0,620086754 intermediary metabolism and respiration |
| Rv0694  | 3  | 3  | 0,62647 intermediary metabolism and respiration     |
| Rv0809  | 3  | 3  | 0,62647 intermediary metabolism and respiration     |
| Rv1121  | 3  | 3  | 0,62647 intermediary metabolism and respiration     |
| Rv1611  | 3  | 3  | 0,62647 intermediary metabolism and respiration     |
| Rv3814c | 3  | 3  | 0,62647 intermediary metabolism and respiration     |
| Rv0082  | 1  | 2  | 0,643390112 intermediary metabolism and respiration |
| Rv0547c | 1  | 2  | 0,643390112 intermediary metabolism and respiration |
| Rv0734  | 1  | 2  | 0,643390112 intermediary metabolism and respiration |
| Rv1187  | 1  | 2  | 0,643390112 intermediary metabolism and respiration |
| Rv1360  | 1  | 2  | 0,643390112 intermediary metabolism and respiration |
| Rv1538c | 1  | 2  | 0,643390112 intermediary metabolism and respiration |

|         |    |    |                                                     |
|---------|----|----|-----------------------------------------------------|
| Rv1568  | 1  | 2  | 0,643390112 intermediary metabolism and respiration |
| Rv1613  | 1  | 2  | 0,643390112 intermediary metabolism and respiration |
| Rv1833c | 1  | 2  | 0,643390112 intermediary metabolism and respiration |
| Rv2677c | 1  | 2  | 0,643390112 intermediary metabolism and respiration |
| Rv2765  | 1  | 2  | 0,643390112 intermediary metabolism and respiration |
| Rv2111c | 94 | 14 | 0,654128977 intermediary metabolism and respiration |
| Rv0363c | 6  | 4  | 0,654786705 intermediary metabolism and respiration |
| Rv0568  | 6  | 4  | 0,654786705 intermediary metabolism and respiration |
| Rv0948c | 6  | 4  | 0,654786705 intermediary metabolism and respiration |
| Rv2220  | 6  | 4  | 0,654786705 intermediary metabolism and respiration |
| Rv2726c | 6  | 4  | 0,654786705 intermediary metabolism and respiration |
| Rv2781c | 6  | 4  | 0,654786705 intermediary metabolism and respiration |
| Rv0327c | 11 | 0  | 0,766641622 intermediary metabolism and respiration |
| Rv0763c | 11 | 0  | 0,766641622 intermediary metabolism and respiration |
| Rv3914  | 32 | 3  | 0,768017391 intermediary metabolism and respiration |
| Rv3837c | 33 | 3  | 0,782530909 intermediary metabolism and respiration |
| Rv0369c | 4  | 3  | 0,787843454 intermediary metabolism and respiration |
| Rv1326c | 4  | 3  | 0,787843454 intermediary metabolism and respiration |
| Rv2773c | 4  | 3  | 0,787843454 intermediary metabolism and respiration |
| Rv2847c | 4  | 3  | 0,787843454 intermediary metabolism and respiration |
| Rv3028c | 4  | 3  | 0,787843454 intermediary metabolism and respiration |
| Rv0511  | 8  | 5  | 0,81076095 intermediary metabolism and respiration  |
| Rv0765c | 18 | 1  | 0,816741656 intermediary metabolism and respiration |
| Rv0919  | 18 | 1  | 0,816741656 intermediary metabolism and respiration |
| Rv0814c | 19 | 1  | 0,823208877 intermediary metabolism and respiration |
| Rv1843c | 9  | 5  | 0,879377032 intermediary metabolism and respiration |
| Rv3029c | 9  | 5  | 0,879377032 intermediary metabolism and respiration |
| Rv3145  | 9  | 5  | 0,879377032 intermediary metabolism and respiration |
| Rv0415  | 10 | 5  | 0,886611927 intermediary metabolism and respiration |
| Rv0562  | 5  | 3  | 0,890066667 intermediary metabolism and respiration |
| Rv2540c | 5  | 3  | 0,890066667 intermediary metabolism and respiration |
| Rv2918c | 5  | 3  | 0,890066667 intermediary metabolism and respiration |
| Rv3198A | 5  | 3  | 0,890066667 intermediary metabolism and respiration |
| Rv3225c | 5  | 3  | 0,890066667 intermediary metabolism and respiration |

|         |   |   |                                                     |
|---------|---|---|-----------------------------------------------------|
| Rv0118c | 0 | 1 | 0,891983427 intermediary metabolism and respiration |
| Rv0321  | 0 | 1 | 0,891983427 intermediary metabolism and respiration |
| Rv1384  | 0 | 1 | 0,891983427 intermediary metabolism and respiration |
| Rv1681  | 0 | 1 | 0,891983427 intermediary metabolism and respiration |
| Rv1726  | 0 | 1 | 0,891983427 intermediary metabolism and respiration |
| Rv2062c | 0 | 1 | 0,891983427 intermediary metabolism and respiration |
| Rv2447c | 0 | 1 | 0,891983427 intermediary metabolism and respiration |
| Rv2855  | 0 | 1 | 0,891983427 intermediary metabolism and respiration |
| Rv2957  | 0 | 1 | 0,891983427 intermediary metabolism and respiration |
| Rv3085  | 0 | 1 | 0,891983427 intermediary metabolism and respiration |
| Rv3149  | 0 | 1 | 0,891983427 intermediary metabolism and respiration |
| Rv3712  | 0 | 1 | 0,891983427 intermediary metabolism and respiration |
| Rv0245  | 2 | 2 | 0,902076825 intermediary metabolism and respiration |
| Rv0391  | 2 | 2 | 0,902076825 intermediary metabolism and respiration |
| Rv0782  | 2 | 2 | 0,902076825 intermediary metabolism and respiration |
| Rv0812  | 2 | 2 | 0,902076825 intermediary metabolism and respiration |
| Rv0819  | 2 | 2 | 0,902076825 intermediary metabolism and respiration |
| Rv1096  | 2 | 2 | 0,902076825 intermediary metabolism and respiration |
| Rv1098c | 2 | 2 | 0,902076825 intermediary metabolism and respiration |
| Rv1213  | 2 | 2 | 0,902076825 intermediary metabolism and respiration |
| Rv1328  | 2 | 2 | 0,902076825 intermediary metabolism and respiration |
| Rv1377c | 2 | 2 | 0,902076825 intermediary metabolism and respiration |
| Rv1606  | 2 | 2 | 0,902076825 intermediary metabolism and respiration |
| Rv1849  | 2 | 2 | 0,902076825 intermediary metabolism and respiration |
| Rv1850  | 2 | 2 | 0,902076825 intermediary metabolism and respiration |
| Rv1856c | 2 | 2 | 0,902076825 intermediary metabolism and respiration |
| Rv2419c | 2 | 2 | 0,902076825 intermediary metabolism and respiration |
| Rv2439c | 2 | 2 | 0,902076825 intermediary metabolism and respiration |
| Rv2445c | 2 | 2 | 0,902076825 intermediary metabolism and respiration |
| Rv2604c | 2 | 2 | 0,902076825 intermediary metabolism and respiration |
| Rv3137  | 2 | 2 | 0,902076825 intermediary metabolism and respiration |
| Rv3147  | 2 | 2 | 0,902076825 intermediary metabolism and respiration |
| Rv3224  | 2 | 2 | 0,902076825 intermediary metabolism and respiration |
| Rv3396c | 2 | 2 | 0,902076825 intermediary metabolism and respiration |

|         |    |   |                                                     |
|---------|----|---|-----------------------------------------------------|
| Rv3588c | 2  | 2 | 0,902076825 intermediary metabolism and respiration |
| Rv3685c | 2  | 2 | 0,902076825 intermediary metabolism and respiration |
| Rv3815c | 2  | 2 | 0,902076825 intermediary metabolism and respiration |
| Rv1095  | 19 | 8 | 0,922402053 intermediary metabolism and respiration |
| Rv0940c | 17 | 1 | 0,945295065 intermediary metabolism and respiration |
| Rv1595  | 17 | 1 | 0,945295065 intermediary metabolism and respiration |
| Rv1714  | 17 | 1 | 0,945295065 intermediary metabolism and respiration |
| Rv0501  | 20 | 8 | 0,950979338 intermediary metabolism and respiration |
| Rv2338c | 7  | 0 | 0,965258939 intermediary metabolism and respiration |
| Rv3323c | 7  | 0 | 0,965258939 intermediary metabolism and respiration |
| Rv1832  | 14 | 6 | 0,966007031 intermediary metabolism and respiration |
| Rv0896  | 13 | 5 | 0,979843859 intermediary metabolism and respiration |
| Rv3609c | 13 | 5 | 0,979843859 intermediary metabolism and respiration |
| Rv0781  | 7  | 4 | 0,987885942 intermediary metabolism and respiration |
| Rv2776c | 7  | 4 | 0,987885942 intermediary metabolism and respiration |
| Rv2421c | 24 | 8 | 0,995966453 intermediary metabolism and respiration |
| Rv0317c | 8  | 4 | 1,000356578 intermediary metabolism and respiration |
| Rv1293  | 8  | 4 | 1,000356578 intermediary metabolism and respiration |
| Rv1294  | 8  | 4 | 1,000356578 intermediary metabolism and respiration |
| Rv2498c | 8  | 4 | 1,000356578 intermediary metabolism and respiration |
| Rv2753c | 8  | 4 | 1,000356578 intermediary metabolism and respiration |
| Rv3007c | 29 | 4 | 1,000585797 intermediary metabolism and respiration |
| Rv0409  | 3  | 2 | 1,017645149 intermediary metabolism and respiration |
| Rv0619  | 3  | 2 | 1,017645149 intermediary metabolism and respiration |
| Rv0951  | 3  | 2 | 1,017645149 intermediary metabolism and respiration |
| Rv1163  | 3  | 2 | 1,017645149 intermediary metabolism and respiration |
| Rv1240  | 3  | 2 | 1,017645149 intermediary metabolism and respiration |
| Rv1355c | 3  | 2 | 1,017645149 intermediary metabolism and respiration |
| Rv1408  | 3  | 2 | 1,017645149 intermediary metabolism and respiration |
| Rv1409  | 3  | 2 | 1,017645149 intermediary metabolism and respiration |
| Rv1416  | 3  | 2 | 1,017645149 intermediary metabolism and respiration |
| Rv1485  | 3  | 2 | 1,017645149 intermediary metabolism and respiration |
| Rv1559  | 3  | 2 | 1,017645149 intermediary metabolism and respiration |
| Rv1625c | 3  | 2 | 1,017645149 intermediary metabolism and respiration |

|         |    |   |                                                     |
|---------|----|---|-----------------------------------------------------|
| Rv2196  | 3  | 2 | 1,017645149 intermediary metabolism and respiration |
| Rv2535c | 3  | 2 | 1,017645149 intermediary metabolism and respiration |
| Rv2750  | 3  | 2 | 1,017645149 intermediary metabolism and respiration |
| Rv2860c | 3  | 2 | 1,017645149 intermediary metabolism and respiration |
| Rv2951c | 3  | 2 | 1,017645149 intermediary metabolism and respiration |
| Rv3273  | 3  | 2 | 1,017645149 intermediary metabolism and respiration |
| Rv3400  | 3  | 2 | 1,017645149 intermediary metabolism and respiration |
| Rv3419c | 3  | 2 | 1,017645149 intermediary metabolism and respiration |
| Rv3441c | 3  | 2 | 1,017645149 intermediary metabolism and respiration |
| Rv3671c | 3  | 2 | 1,017645149 intermediary metabolism and respiration |
| Rv3883c | 3  | 2 | 1,017645149 intermediary metabolism and respiration |
| Rv0220  | 6  | 3 | 1,023060102 intermediary metabolism and respiration |
| Rv0486  | 6  | 3 | 1,023060102 intermediary metabolism and respiration |
| Rv0802c | 6  | 3 | 1,023060102 intermediary metabolism and respiration |
| Rv1229c | 6  | 3 | 1,023060102 intermediary metabolism and respiration |
| Rv1308  | 6  | 3 | 1,023060102 intermediary metabolism and respiration |
| Rv1309  | 6  | 3 | 1,023060102 intermediary metabolism and respiration |
| Rv2427c | 6  | 3 | 1,023060102 intermediary metabolism and respiration |
| Rv3601c | 12 | 1 | 1,031469845 intermediary metabolism and respiration |
| Rv2669  | 11 | 1 | 1,032354536 intermediary metabolism and respiration |
| Rv0751c | 26 | 4 | 1,044292402 intermediary metabolism and respiration |
| Rv0334  | 13 | 1 | 1,045711168 intermediary metabolism and respiration |
| Rv1939  | 13 | 1 | 1,045711168 intermediary metabolism and respiration |
| Rv1392  | 52 | 9 | 1,064184483 intermediary metabolism and respiration |
| Rv0840c | 34 | 5 | 1,066800249 intermediary metabolism and respiration |
| Rv0864  | 20 | 2 | 1,073512681 intermediary metabolism and respiration |
| Rv3010c | 20 | 2 | 1,073512681 intermediary metabolism and respiration |
| Rv0512  | 7  | 3 | 1,073553923 intermediary metabolism and respiration |
| Rv0866  | 7  | 3 | 1,073553923 intermediary metabolism and respiration |
| Rv1862  | 7  | 3 | 1,073553923 intermediary metabolism and respiration |
| Rv2438c | 7  | 3 | 1,073553923 intermediary metabolism and respiration |
| Rv3146  | 7  | 3 | 1,073553923 intermediary metabolism and respiration |
| Rv2222c | 11 | 4 | 1,075323219 intermediary metabolism and respiration |
| Rv2440c | 11 | 4 | 1,075323219 intermediary metabolism and respiration |



|         |    |    |                                                     |
|---------|----|----|-----------------------------------------------------|
| Rv2453c | 11 | 4  | 1,075323219 intermediary metabolism and respiration |
| Rv2962c | 11 | 4  | 1,075323219 intermediary metabolism and respiration |
| Rv3710  | 16 | 5  | 1,082039404 intermediary metabolism and respiration |
| Rv3596c | 75 | 21 | 1,08529766 intermediary metabolism and respiration  |
| Rv1164  | 9  | 4  | 1,090043564 intermediary metabolism and respiration |
| Rv3579c | 9  | 4  | 1,090043564 intermediary metabolism and respiration |
| Rv0253  | 5  | 0  | 1,093861497 intermediary metabolism and respiration |
| Rv2210c | 5  | 0  | 1,093861497 intermediary metabolism and respiration |
| Rv2747  | 5  | 0  | 1,093861497 intermediary metabolism and respiration |
| Rv3059  | 5  | 0  | 1,093861497 intermediary metabolism and respiration |
| Rv0139  | 14 | 1  | 1,106515077 intermediary metabolism and respiration |
| Rv1403c | 14 | 1  | 1,106515077 intermediary metabolism and respiration |
| Rv2470  | 14 | 1  | 1,106515077 intermediary metabolism and respiration |
| Rv3411c | 12 | 4  | 1,106640649 intermediary metabolism and respiration |
| Rv0374c | 6  | 0  | 1,107198572 intermediary metabolism and respiration |
| Rv0489  | 6  | 0  | 1,107198572 intermediary metabolism and respiration |
| Rv0770  | 6  | 0  | 1,107198572 intermediary metabolism and respiration |
| Rv2622  | 6  | 0  | 1,107198572 intermediary metabolism and respiration |
| Rv3602c | 6  | 0  | 1,107198572 intermediary metabolism and respiration |
| Rv3049c | 32 | 5  | 1,107346728 intermediary metabolism and respiration |
| Rv2867c | 19 | 6  | 1,108162472 intermediary metabolism and respiration |
| Rv3673c | 19 | 6  | 1,108162472 intermediary metabolism and respiration |
| Rv2465c | 29 | 9  | 1,112954871 intermediary metabolism and respiration |
| Rv1310  | 10 | 4  | 1,115414979 intermediary metabolism and respiration |
| Rv1905c | 10 | 4  | 1,115414979 intermediary metabolism and respiration |
| Rv2200c | 10 | 4  | 1,115414979 intermediary metabolism and respiration |
| Rv2895c | 10 | 4  | 1,115414979 intermediary metabolism and respiration |
| Rv3842c | 10 | 4  | 1,115414979 intermediary metabolism and respiration |
| Rv3859c | 18 | 6  | 1,120065972 intermediary metabolism and respiration |
| Rv0635  | 18 | 7  | 1,121058282 intermediary metabolism and respiration |
| Rv0687  | 18 | 7  | 1,121058282 intermediary metabolism and respiration |
| Rv2110c | 20 | 6  | 1,121612319 intermediary metabolism and respiration |
| Rv3518c | 24 | 3  | 1,123250242 intermediary metabolism and respiration |
| Rv3567c | 15 | 1  | 1,126699026 intermediary metabolism and respiration |

|         |    |    |                                                     |
|---------|----|----|-----------------------------------------------------|
| Rv2497c | 94 | 25 | 1,13203309 intermediary metabolism and respiration  |
| Rv0075  | 5  | 2  | 1,132270883 intermediary metabolism and respiration |
| Rv0187  | 5  | 2  | 1,132270883 intermediary metabolism and respiration |
| Rv0380c | 5  | 2  | 1,132270883 intermediary metabolism and respiration |
| Rv1245c | 5  | 2  | 1,132270883 intermediary metabolism and respiration |
| Rv1448c | 5  | 2  | 1,132270883 intermediary metabolism and respiration |
| Rv1602  | 5  | 2  | 1,132270883 intermediary metabolism and respiration |
| Rv1603  | 5  | 2  | 1,132270883 intermediary metabolism and respiration |
| Rv1751  | 5  | 2  | 1,132270883 intermediary metabolism and respiration |
| Rv2045c | 5  | 2  | 1,132270883 intermediary metabolism and respiration |
| Rv2112c | 5  | 2  | 1,132270883 intermediary metabolism and respiration |
| Rv2241  | 5  | 2  | 1,132270883 intermediary metabolism and respiration |
| Rv2388c | 5  | 2  | 1,132270883 intermediary metabolism and respiration |
| Rv3138  | 5  | 2  | 1,132270883 intermediary metabolism and respiration |
| Rv3379c | 5  | 2  | 1,132270883 intermediary metabolism and respiration |
| Rv3436c | 5  | 2  | 1,132270883 intermediary metabolism and respiration |
| Rv3549c | 5  | 2  | 1,132270883 intermediary metabolism and respiration |
| Rv2851c | 23 | 7  | 1,133138026 intermediary metabolism and respiration |
| Rv1391  | 29 | 10 | 1,134590476 intermediary metabolism and respiration |
| Rv0147  | 16 | 2  | 1,143221307 intermediary metabolism and respiration |
| Rv0223c | 16 | 2  | 1,143221307 intermediary metabolism and respiration |
| Rv0769  | 16 | 2  | 1,143221307 intermediary metabolism and respiration |
| Rv1336  | 16 | 2  | 1,143221307 intermediary metabolism and respiration |
| Rv0478  | 8  | 3  | 1,143564814 intermediary metabolism and respiration |
| Rv0886  | 8  | 3  | 1,143564814 intermediary metabolism and respiration |
| Rv1520  | 8  | 3  | 1,143564814 intermediary metabolism and respiration |
| Rv1617  | 8  | 3  | 1,143564814 intermediary metabolism and respiration |
| Rv2130c | 15 | 2  | 1,146799395 intermediary metabolism and respiration |
| Rv0848  | 17 | 2  | 1,149582391 intermediary metabolism and respiration |
| Rv2368c | 17 | 2  | 1,149582391 intermediary metabolism and respiration |
| Rv1286  | 61 | 12 | 1,154495719 intermediary metabolism and respiration |
| Rv0548c | 6  | 2  | 1,154704835 intermediary metabolism and respiration |
| Rv0567  | 6  | 2  | 1,154704835 intermediary metabolism and respiration |
| Rv0815c | 6  | 2  | 1,154704835 intermediary metabolism and respiration |

|         |   |   |                                                     |
|---------|---|---|-----------------------------------------------------|
| Rv1077  | 6 | 2 | 1,154704835 intermediary metabolism and respiration |
| Rv1393c | 6 | 2 | 1,154704835 intermediary metabolism and respiration |
| Rv1844c | 6 | 2 | 1,154704835 intermediary metabolism and respiration |
| Rv1916  | 6 | 2 | 1,154704835 intermediary metabolism and respiration |
| Rv2195  | 6 | 2 | 1,154704835 intermediary metabolism and respiration |
| Rv2280  | 6 | 2 | 1,154704835 intermediary metabolism and respiration |
| Rv2970c | 6 | 2 | 1,154704835 intermediary metabolism and respiration |
| Rv3279c | 6 | 2 | 1,154704835 intermediary metabolism and respiration |
| Rv3487c | 6 | 2 | 1,154704835 intermediary metabolism and respiration |
| Rv0097  | 1 | 1 | 1,155519357 intermediary metabolism and respiration |
| Rv0161  | 1 | 1 | 1,155519357 intermediary metabolism and respiration |
| Rv0162c | 1 | 1 | 1,155519357 intermediary metabolism and respiration |
| Rv0255c | 1 | 1 | 1,155519357 intermediary metabolism and respiration |
| Rv0316  | 1 | 1 | 1,155519357 intermediary metabolism and respiration |
| Rv0337c | 1 | 1 | 1,155519357 intermediary metabolism and respiration |
| Rv0357c | 1 | 1 | 1,155519357 intermediary metabolism and respiration |
| Rv0439c | 1 | 1 | 1,155519357 intermediary metabolism and respiration |
| Rv0696  | 1 | 1 | 1,155519357 intermediary metabolism and respiration |
| Rv0697  | 1 | 1 | 1,155519357 intermediary metabolism and respiration |
| Rv0778  | 1 | 1 | 1,155519357 intermediary metabolism and respiration |
| Rv0780  | 1 | 1 | 1,155519357 intermediary metabolism and respiration |
| Rv0803  | 1 | 1 | 1,155519357 intermediary metabolism and respiration |
| Rv0868c | 1 | 1 | 1,155519357 intermediary metabolism and respiration |
| Rv0892  | 1 | 1 | 1,155519357 intermediary metabolism and respiration |
| Rv0945  | 1 | 1 | 1,155519357 intermediary metabolism and respiration |
| Rv0946c | 1 | 1 | 1,155519357 intermediary metabolism and respiration |
| Rv0957  | 1 | 1 | 1,155519357 intermediary metabolism and respiration |
| Rv1079  | 1 | 1 | 1,155519357 intermediary metabolism and respiration |
| Rv1092c | 1 | 1 | 1,155519357 intermediary metabolism and respiration |
| Rv1099c | 1 | 1 | 1,155519357 intermediary metabolism and respiration |
| Rv1122  | 1 | 1 | 1,155519357 intermediary metabolism and respiration |
| Rv1212c | 1 | 1 | 1,155519357 intermediary metabolism and respiration |
| Rv1220c | 1 | 1 | 1,155519357 intermediary metabolism and respiration |
| Rv1254  | 1 | 1 | 1,155519357 intermediary metabolism and respiration |

|         |   |   |                                                     |
|---------|---|---|-----------------------------------------------------|
| Rv1279  | 1 | 1 | 1,155519357 intermediary metabolism and respiration |
| Rv1319c | 1 | 1 | 1,155519357 intermediary metabolism and respiration |
| Rv1320c | 1 | 1 | 1,155519357 intermediary metabolism and respiration |
| Rv1381  | 1 | 1 | 1,155519357 intermediary metabolism and respiration |
| Rv1383  | 1 | 1 | 1,155519357 intermediary metabolism and respiration |
| Rv1445c | 1 | 1 | 1,155519357 intermediary metabolism and respiration |
| Rv1512  | 1 | 1 | 1,155519357 intermediary metabolism and respiration |
| Rv1569  | 1 | 1 | 1,155519357 intermediary metabolism and respiration |
| Rv1570  | 1 | 1 | 1,155519357 intermediary metabolism and respiration |
| Rv1605  | 1 | 1 | 1,155519357 intermediary metabolism and respiration |
| Rv1612  | 1 | 1 | 1,155519357 intermediary metabolism and respiration |
| Rv1653  | 1 | 1 | 1,155519357 intermediary metabolism and respiration |
| Rv1853  | 1 | 1 | 1,155519357 intermediary metabolism and respiration |
| Rv2065  | 1 | 1 | 1,155519357 intermediary metabolism and respiration |
| Rv2066  | 1 | 1 | 1,155519357 intermediary metabolism and respiration |
| Rv2072c | 1 | 1 | 1,155519357 intermediary metabolism and respiration |
| Rv2118c | 1 | 1 | 1,155519357 intermediary metabolism and respiration |
| Rv2201  | 1 | 1 | 1,155519357 intermediary metabolism and respiration |
| Rv2207  | 1 | 1 | 1,155519357 intermediary metabolism and respiration |
| Rv2249c | 1 | 1 | 1,155519357 intermediary metabolism and respiration |
| Rv2251  | 1 | 1 | 1,155519357 intermediary metabolism and respiration |
| Rv2259  | 1 | 1 | 1,155519357 intermediary metabolism and respiration |
| Rv2321c | 1 | 1 | 1,155519357 intermediary metabolism and respiration |
| Rv2363  | 1 | 1 | 1,155519357 intermediary metabolism and respiration |
| Rv2435c | 1 | 1 | 1,155519357 intermediary metabolism and respiration |
| Rv2436  | 1 | 1 | 1,155519357 intermediary metabolism and respiration |
| Rv2485c | 1 | 1 | 1,155519357 intermediary metabolism and respiration |
| Rv2509  | 1 | 1 | 1,155519357 intermediary metabolism and respiration |
| Rv2739c | 1 | 1 | 1,155519357 intermediary metabolism and respiration |
| Rv2848c | 1 | 1 | 1,155519357 intermediary metabolism and respiration |
| Rv2858c | 1 | 1 | 1,155519357 intermediary metabolism and respiration |
| Rv2859c | 1 | 1 | 1,155519357 intermediary metabolism and respiration |
| Rv2993c | 1 | 1 | 1,155519357 intermediary metabolism and respiration |
| Rv3150  | 1 | 1 | 1,155519357 intermediary metabolism and respiration |

|         |    |   |                                                     |
|---------|----|---|-----------------------------------------------------|
| Rv3151  | 1  | 1 | 1,155519357 intermediary metabolism and respiration |
| Rv3152  | 1  | 1 | 1,155519357 intermediary metabolism and respiration |
| Rv3157  | 1  | 1 | 1,155519357 intermediary metabolism and respiration |
| Rv3227  | 1  | 1 | 1,155519357 intermediary metabolism and respiration |
| Rv3303c | 1  | 1 | 1,155519357 intermediary metabolism and respiration |
| Rv3305c | 1  | 1 | 1,155519357 intermediary metabolism and respiration |
| Rv3306c | 1  | 1 | 1,155519357 intermediary metabolism and respiration |
| Rv3319  | 1  | 1 | 1,155519357 intermediary metabolism and respiration |
| Rv3352c | 1  | 1 | 1,155519357 intermediary metabolism and respiration |
| Rv3393  | 1  | 1 | 1,155519357 intermediary metabolism and respiration |
| Rv3401  | 1  | 1 | 1,155519357 intermediary metabolism and respiration |
| Rv3423c | 1  | 1 | 1,155519357 intermediary metabolism and respiration |
| Rv3606c | 1  | 1 | 1,155519357 intermediary metabolism and respiration |
| Rv3628  | 1  | 1 | 1,155519357 intermediary metabolism and respiration |
| Rv3713  | 1  | 1 | 1,155519357 intermediary metabolism and respiration |
| Rv3762c | 1  | 1 | 1,155519357 intermediary metabolism and respiration |
| Rv0046c | 37 | 7 | 1,162033776 intermediary metabolism and respiration |
| Rv2202c | 36 | 5 | 1,164654035 intermediary metabolism and respiration |
| Rv1471  | 15 | 5 | 1,167008184 intermediary metabolism and respiration |
| Rv0636  | 29 | 8 | 1,167509737 intermediary metabolism and respiration |
| Rv0846c | 10 | 1 | 1,169814587 intermediary metabolism and respiration |
| Rv0884c | 10 | 1 | 1,169814587 intermediary metabolism and respiration |
| Rv1304  | 10 | 1 | 1,169814587 intermediary metabolism and respiration |
| Rv1412  | 10 | 1 | 1,169814587 intermediary metabolism and respiration |
| Rv1928c | 10 | 1 | 1,169814587 intermediary metabolism and respiration |
| Rv3464  | 10 | 1 | 1,169814587 intermediary metabolism and respiration |
| Rv3530c | 10 | 1 | 1,169814587 intermediary metabolism and respiration |
| Rv3538  | 10 | 1 | 1,169814587 intermediary metabolism and respiration |
| Rv0338c | 9  | 1 | 1,171820425 intermediary metabolism and respiration |
| Rv1155  | 9  | 1 | 1,171820425 intermediary metabolism and respiration |
| Rv1307  | 9  | 1 | 1,171820425 intermediary metabolism and respiration |
| Rv0423c | 33 | 9 | 1,172754192 intermediary metabolism and respiration |
| Rv2457c | 33 | 9 | 1,172754192 intermediary metabolism and respiration |
| Rv3118  | 32 | 6 | 1,174939457 intermediary metabolism and respiration |

|         |   |   |                                                     |
|---------|---|---|-----------------------------------------------------|
| Rv0637  | 9 | 3 | 1,175481928 intermediary metabolism and respiration |
| Rv0688  | 9 | 3 | 1,175481928 intermediary metabolism and respiration |
| Rv0794c | 9 | 3 | 1,175481928 intermediary metabolism and respiration |
| Rv1389  | 9 | 3 | 1,175481928 intermediary metabolism and respiration |
| Rv2109c | 9 | 3 | 1,175481928 intermediary metabolism and respiration |
| Rv0068  | 2 | 1 | 1,177742083 intermediary metabolism and respiration |
| Rv0084  | 2 | 1 | 1,177742083 intermediary metabolism and respiration |
| Rv0089  | 2 | 1 | 1,177742083 intermediary metabolism and respiration |
| Rv0091  | 2 | 1 | 1,177742083 intermediary metabolism and respiration |
| Rv0189c | 2 | 1 | 1,177742083 intermediary metabolism and respiration |
| Rv0213c | 2 | 1 | 1,177742083 intermediary metabolism and respiration |
| Rv0370c | 2 | 1 | 1,177742083 intermediary metabolism and respiration |
| Rv0407  | 2 | 1 | 1,177742083 intermediary metabolism and respiration |
| Rv0417  | 2 | 1 | 1,177742083 intermediary metabolism and respiration |
| Rv0484c | 2 | 1 | 1,177742083 intermediary metabolism and respiration |
| Rv0500  | 2 | 1 | 1,177742083 intermediary metabolism and respiration |
| Rv0536  | 2 | 1 | 1,177742083 intermediary metabolism and respiration |
| Rv0542c | 2 | 1 | 1,177742083 intermediary metabolism and respiration |
| Rv0618  | 2 | 1 | 1,177742083 intermediary metabolism and respiration |
| Rv0773c | 2 | 1 | 1,177742083 intermediary metabolism and respiration |
| Rv0843  | 2 | 1 | 1,177742083 intermediary metabolism and respiration |
| Rv0851c | 2 | 1 | 1,177742083 intermediary metabolism and respiration |
| Rv0853c | 2 | 1 | 1,177742083 intermediary metabolism and respiration |
| Rv0881  | 2 | 1 | 1,177742083 intermediary metabolism and respiration |
| Rv0913c | 2 | 1 | 1,177742083 intermediary metabolism and respiration |
| Rv1005c | 2 | 1 | 1,177742083 intermediary metabolism and respiration |
| Rv1090  | 2 | 1 | 1,177742083 intermediary metabolism and respiration |
| Rv1104  | 2 | 1 | 1,177742083 intermediary metabolism and respiration |
| Rv1144  | 2 | 1 | 1,177742083 intermediary metabolism and respiration |
| Rv1257c | 2 | 1 | 1,177742083 intermediary metabolism and respiration |
| Rv1318c | 2 | 1 | 1,177742083 intermediary metabolism and respiration |
| Rv1442  | 2 | 1 | 1,177742083 intermediary metabolism and respiration |
| Rv1447c | 2 | 1 | 1,177742083 intermediary metabolism and respiration |
| Rv1454c | 2 | 1 | 1,177742083 intermediary metabolism and respiration |

|         |   |   |                                                     |
|---------|---|---|-----------------------------------------------------|
| Rv1530  | 2 | 1 | 1,177742083 intermediary metabolism and respiration |
| Rv1601  | 2 | 1 | 1,177742083 intermediary metabolism and respiration |
| Rv1604  | 2 | 1 | 1,177742083 intermediary metabolism and respiration |
| Rv1656  | 2 | 1 | 1,177742083 intermediary metabolism and respiration |
| Rv1658  | 2 | 1 | 1,177742083 intermediary metabolism and respiration |
| Rv1713  | 2 | 1 | 1,177742083 intermediary metabolism and respiration |
| Rv1786  | 2 | 1 | 1,177742083 intermediary metabolism and respiration |
| Rv1812c | 2 | 1 | 1,177742083 intermediary metabolism and respiration |
| Rv1834  | 2 | 1 | 1,177742083 intermediary metabolism and respiration |
| Rv1852  | 2 | 1 | 1,177742083 intermediary metabolism and respiration |
| Rv1885c | 2 | 1 | 1,177742083 intermediary metabolism and respiration |
| Rv2070c | 2 | 1 | 1,177742083 intermediary metabolism and respiration |
| Rv2074  | 2 | 1 | 1,177742083 intermediary metabolism and respiration |
| Rv2095c | 2 | 1 | 1,177742083 intermediary metabolism and respiration |
| Rv2096c | 2 | 1 | 1,177742083 intermediary metabolism and respiration |
| Rv2211c | 2 | 1 | 1,177742083 intermediary metabolism and respiration |
| Rv2212  | 2 | 1 | 1,177742083 intermediary metabolism and respiration |
| Rv2250A | 2 | 1 | 1,177742083 intermediary metabolism and respiration |
| Rv2344c | 2 | 1 | 1,177742083 intermediary metabolism and respiration |
| Rv2393  | 2 | 1 | 1,177742083 intermediary metabolism and respiration |
| Rv2467  | 2 | 1 | 1,177742083 intermediary metabolism and respiration |
| Rv2539c | 2 | 1 | 1,177742083 intermediary metabolism and respiration |
| Rv2678c | 2 | 1 | 1,177742083 intermediary metabolism and respiration |
| Rv2727c | 2 | 1 | 1,177742083 intermediary metabolism and respiration |
| Rv2800  | 2 | 1 | 1,177742083 intermediary metabolism and respiration |
| Rv2850c | 2 | 1 | 1,177742083 intermediary metabolism and respiration |
| Rv2857c | 2 | 1 | 1,177742083 intermediary metabolism and respiration |
| Rv2861c | 2 | 1 | 1,177742083 intermediary metabolism and respiration |
| Rv2952  | 2 | 1 | 1,177742083 intermediary metabolism and respiration |
| Rv2967c | 2 | 1 | 1,177742083 intermediary metabolism and respiration |
| Rv3068c | 2 | 1 | 1,177742083 intermediary metabolism and respiration |
| Rv3106  | 2 | 1 | 1,177742083 intermediary metabolism and respiration |
| Rv3148  | 2 | 1 | 1,177742083 intermediary metabolism and respiration |
| Rv3154  | 2 | 1 | 1,177742083 intermediary metabolism and respiration |

|         |   |   |                                                     |
|---------|---|---|-----------------------------------------------------|
| Rv3156  | 2 | 1 | 1,177742083 intermediary metabolism and respiration |
| Rv3170  | 2 | 1 | 1,177742083 intermediary metabolism and respiration |
| Rv3199c | 2 | 1 | 1,177742083 intermediary metabolism and respiration |
| Rv3261  | 2 | 1 | 1,177742083 intermediary metabolism and respiration |
| Rv3316  | 2 | 1 | 1,177742083 intermediary metabolism and respiration |
| Rv3356c | 2 | 1 | 1,177742083 intermediary metabolism and respiration |
| Rv3377c | 2 | 1 | 1,177742083 intermediary metabolism and respiration |
| Rv3469c | 2 | 1 | 1,177742083 intermediary metabolism and respiration |
| Rv3485c | 2 | 1 | 1,177742083 intermediary metabolism and respiration |
| Rv3509c | 2 | 1 | 1,177742083 intermediary metabolism and respiration |
| Rv3624c | 2 | 1 | 1,177742083 intermediary metabolism and respiration |
| Rv0198c | 7 | 2 | 1,179167167 intermediary metabolism and respiration |
| Rv0711  | 7 | 2 | 1,179167167 intermediary metabolism and respiration |
| Rv1327c | 7 | 2 | 1,179167167 intermediary metabolism and respiration |
| Rv1373  | 7 | 2 | 1,179167167 intermediary metabolism and respiration |
| Rv1394c | 7 | 2 | 1,179167167 intermediary metabolism and respiration |
| Rv1451  | 7 | 2 | 1,179167167 intermediary metabolism and respiration |
| Rv1475c | 7 | 2 | 1,179167167 intermediary metabolism and respiration |
| Rv1695  | 7 | 2 | 1,179167167 intermediary metabolism and respiration |
| Rv2131c | 7 | 2 | 1,179167167 intermediary metabolism and respiration |
| Rv2786c | 7 | 2 | 1,179167167 intermediary metabolism and respiration |
| Rv3677c | 7 | 2 | 1,179167167 intermediary metabolism and respiration |
| Rv0157  | 3 | 1 | 1,180692338 intermediary metabolism and respiration |
| Rv0505c | 3 | 1 | 1,180692338 intermediary metabolism and respiration |
| Rv0539  | 3 | 1 | 1,180692338 intermediary metabolism and respiration |
| Rv0553  | 3 | 1 | 1,180692338 intermediary metabolism and respiration |
| Rv0889c | 3 | 1 | 1,180692338 intermediary metabolism and respiration |
| Rv0897c | 3 | 1 | 1,180692338 intermediary metabolism and respiration |
| Rv1208  | 3 | 1 | 1,180692338 intermediary metabolism and respiration |
| Rv1438  | 3 | 1 | 1,180692338 intermediary metabolism and respiration |
| Rv1498c | 3 | 1 | 1,180692338 intermediary metabolism and respiration |
| Rv1511  | 3 | 1 | 1,180692338 intermediary metabolism and respiration |
| Rv1609  | 3 | 1 | 1,180692338 intermediary metabolism and respiration |
| Rv1654  | 3 | 1 | 1,180692338 intermediary metabolism and respiration |



|         |     |    |                                                     |
|---------|-----|----|-----------------------------------------------------|
| Rv1731  | 3   | 1  | 1,180692338 intermediary metabolism and respiration |
| Rv1771  | 3   | 1  | 1,180692338 intermediary metabolism and respiration |
| Rv1785c | 3   | 1  | 1,180692338 intermediary metabolism and respiration |
| Rv1923  | 3   | 1  | 1,180692338 intermediary metabolism and respiration |
| Rv1941  | 3   | 1  | 1,180692338 intermediary metabolism and respiration |
| Rv2141c | 3   | 1  | 1,180692338 intermediary metabolism and respiration |
| Rv2394  | 3   | 1  | 1,180692338 intermediary metabolism and respiration |
| Rv2471  | 3   | 1  | 1,180692338 intermediary metabolism and respiration |
| Rv2511  | 3   | 1  | 1,180692338 intermediary metabolism and respiration |
| Rv2537c | 3   | 1  | 1,180692338 intermediary metabolism and respiration |
| Rv2538c | 3   | 1  | 1,180692338 intermediary metabolism and respiration |
| Rv2589  | 3   | 1  | 1,180692338 intermediary metabolism and respiration |
| Rv2725c | 3   | 1  | 1,180692338 intermediary metabolism and respiration |
| Rv2775  | 3   | 1  | 1,180692338 intermediary metabolism and respiration |
| Rv2899c | 3   | 1  | 1,180692338 intermediary metabolism and respiration |
| Rv2977c | 3   | 1  | 1,180692338 intermediary metabolism and respiration |
| Rv3042c | 3   | 1  | 1,180692338 intermediary metabolism and respiration |
| Rv3158  | 3   | 1  | 1,180692338 intermediary metabolism and respiration |
| Rv3214  | 3   | 1  | 1,180692338 intermediary metabolism and respiration |
| Rv3255c | 3   | 1  | 1,180692338 intermediary metabolism and respiration |
| Rv3299c | 3   | 1  | 1,180692338 intermediary metabolism and respiration |
| Rv3607c | 3   | 1  | 1,180692338 intermediary metabolism and respiration |
| Rv3696c | 3   | 1  | 1,180692338 intermediary metabolism and respiration |
| Rv3709c | 3   | 1  | 1,180692338 intermediary metabolism and respiration |
| Rv3752c | 3   | 1  | 1,180692338 intermediary metabolism and respiration |
| Rv3777  | 3   | 1  | 1,180692338 intermediary metabolism and respiration |
| Rv3838c | 3   | 1  | 1,180692338 intermediary metabolism and respiration |
| Rv1285  | 172 | 38 | 1,182433439 intermediary metabolism and respiration |
| Rv0462  | 4   | 2  | 1,186675548 intermediary metabolism and respiration |
| Rv0663  | 4   | 2  | 1,186675548 intermediary metabolism and respiration |
| Rv0733  | 4   | 2  | 1,186675548 intermediary metabolism and respiration |
| Rv0777  | 4   | 2  | 1,186675548 intermediary metabolism and respiration |
| Rv0953c | 4   | 2  | 1,186675548 intermediary metabolism and respiration |
| Rv1170  | 4   | 2  | 1,186675548 intermediary metabolism and respiration |

|         |    |    |                                                     |
|---------|----|----|-----------------------------------------------------|
| Rv1201c | 4  | 2  | 1,186675548 intermediary metabolism and respiration |
| Rv1202  | 4  | 2  | 1,186675548 intermediary metabolism and respiration |
| Rv1207  | 4  | 2  | 1,186675548 intermediary metabolism and respiration |
| Rv1333  | 4  | 2  | 1,186675548 intermediary metabolism and respiration |
| Rv1437  | 4  | 2  | 1,186675548 intermediary metabolism and respiration |
| Rv1599  | 4  | 2  | 1,186675548 intermediary metabolism and respiration |
| Rv1820  | 4  | 2  | 1,186675548 intermediary metabolism and respiration |
| Rv2089c | 4  | 2  | 1,186675548 intermediary metabolism and respiration |
| Rv2121c | 4  | 2  | 1,186675548 intermediary metabolism and respiration |
| Rv2194  | 4  | 2  | 1,186675548 intermediary metabolism and respiration |
| Rv2404c | 4  | 2  | 1,186675548 intermediary metabolism and respiration |
| Rv2672  | 4  | 2  | 1,186675548 intermediary metabolism and respiration |
| Rv2782c | 4  | 2  | 1,186675548 intermediary metabolism and respiration |
| Rv3548c | 4  | 2  | 1,186675548 intermediary metabolism and respiration |
| Rv3726  | 4  | 2  | 1,186675548 intermediary metabolism and respiration |
| Rv0416  | 10 | 3  | 1,188374024 intermediary metabolism and respiration |
| Rv3045  | 10 | 3  | 1,188374024 intermediary metabolism and respiration |
| Rv3608c | 10 | 3  | 1,188374024 intermediary metabolism and respiration |
| Rv1415  | 14 | 2  | 1,213683268 intermediary metabolism and respiration |
| Rv1826  | 14 | 2  | 1,213683268 intermediary metabolism and respiration |
| Rv2296  | 14 | 2  | 1,213683268 intermediary metabolism and respiration |
| Rv0125  | 13 | 2  | 1,215391325 intermediary metabolism and respiration |
| Rv2068c | 13 | 2  | 1,215391325 intermediary metabolism and respiration |
| Rv3086  | 13 | 2  | 1,215391325 intermediary metabolism and respiration |
| Rv1796  | 15 | 4  | 1,243303357 intermediary metabolism and respiration |
| Rv1305  | 18 | 3  | 1,25141408 intermediary metabolism and respiration  |
| Rv2454c | 18 | 3  | 1,25141408 intermediary metabolism and respiration  |
| Rv2988c | 18 | 3  | 1,25141408 intermediary metabolism and respiration  |
| Rv1589  | 17 | 3  | 1,251923802 intermediary metabolism and respiration |
| Rv3117  | 19 | 3  | 1,254088199 intermediary metabolism and respiration |
| Rv0148  | 22 | 4  | 1,275175164 intermediary metabolism and respiration |
| Rv3283  | 21 | 4  | 1,276017761 intermediary metabolism and respiration |
| Rv2460c | 83 | 21 | 1,276017761 intermediary metabolism and respiration |
| Rv2764c | 23 | 4  | 1,278009252 intermediary metabolism and respiration |

|         |    |    |                                                     |
|---------|----|----|-----------------------------------------------------|
| Rv2583c | 22 | 6  | 1,281240785 intermediary metabolism and respiration |
| Rv2455c | 34 | 9  | 1,329955182 intermediary metabolism and respiration |
| Rv3581c | 69 | 17 | 1,396845292 intermediary metabolism and respiration |
| Rv0422c | 8  | 1  | 1,56554878 intermediary metabolism and respiration  |
| Rv1001  | 8  | 1  | 1,56554878 intermediary metabolism and respiration  |
| Rv1774  | 8  | 1  | 1,56554878 intermediary metabolism and respiration  |
| Rv2193  | 8  | 1  | 1,56554878 intermediary metabolism and respiration  |
| Rv3027c | 8  | 1  | 1,56554878 intermediary metabolism and respiration  |
| Rv3410c | 8  | 1  | 1,56554878 intermediary metabolism and respiration  |
| Rv3537  | 8  | 1  | 1,56554878 intermediary metabolism and respiration  |
| Rv1647  | 7  | 1  | 1,56554878 intermediary metabolism and respiration  |
| Rv1878  | 7  | 1  | 1,56554878 intermediary metabolism and respiration  |
| Rv2671  | 7  | 1  | 1,56554878 intermediary metabolism and respiration  |
| Rv3116  | 7  | 1  | 1,56554878 intermediary metabolism and respiration  |
| Rv3203  | 7  | 1  | 1,56554878 intermediary metabolism and respiration  |
| Rv3631  | 7  | 1  | 1,56554878 intermediary metabolism and respiration  |
| Rv3784  | 7  | 1  | 1,56554878 intermediary metabolism and respiration  |
| Rv0137c | 12 | 2  | 1,56554878 intermediary metabolism and respiration  |
| Rv0241c | 6  | 1  | 1,56554878 intermediary metabolism and respiration  |
| Rv1497  | 6  | 1  | 1,56554878 intermediary metabolism and respiration  |
| Rv1882c | 6  | 1  | 1,56554878 intermediary metabolism and respiration  |
| Rv2043c | 12 | 2  | 1,56554878 intermediary metabolism and respiration  |
| Rv2097c | 6  | 1  | 1,56554878 intermediary metabolism and respiration  |
| Rv2225  | 6  | 1  | 1,56554878 intermediary metabolism and respiration  |
| Rv2392  | 6  | 1  | 1,56554878 intermediary metabolism and respiration  |
| Rv2715  | 6  | 1  | 1,56554878 intermediary metabolism and respiration  |
| Rv2959c | 12 | 2  | 1,56554878 intermediary metabolism and respiration  |
| Rv3034c | 6  | 1  | 1,56554878 intermediary metabolism and respiration  |
| Rv3057c | 6  | 1  | 1,56554878 intermediary metabolism and respiration  |
| Rv3093c | 6  | 1  | 1,56554878 intermediary metabolism and respiration  |
| Rv3309c | 12 | 2  | 1,56554878 intermediary metabolism and respiration  |
| Rv2218  | 11 | 2  | 1,56554878 intermediary metabolism and respiration  |
| Rv2266  | 11 | 2  | 1,56554878 intermediary metabolism and respiration  |
| Rv2849c | 11 | 2  | 1,56554878 intermediary metabolism and respiration  |

|         |    |   |                                                    |
|---------|----|---|----------------------------------------------------|
| Rv0149  | 16 | 3 | 1,56554878 intermediary metabolism and respiration |
| Rv3257c | 16 | 3 | 1,56554878 intermediary metabolism and respiration |
| Rv0066c | 5  | 1 | 1,56554878 intermediary metabolism and respiration |
| Rv0315  | 5  | 1 | 1,56554878 intermediary metabolism and respiration |
| Rv0373c | 5  | 1 | 1,56554878 intermediary metabolism and respiration |
| Rv0730  | 5  | 1 | 1,56554878 intermediary metabolism and respiration |
| Rv0865  | 5  | 1 | 1,56554878 intermediary metabolism and respiration |
| Rv0869c | 5  | 1 | 1,56554878 intermediary metabolism and respiration |
| Rv0993  | 5  | 1 | 1,56554878 intermediary metabolism and respiration |
| Rv1017c | 5  | 1 | 1,56554878 intermediary metabolism and respiration |
| Rv1131  | 15 | 3 | 1,56554878 intermediary metabolism and respiration |
| Rv1306  | 10 | 2 | 1,56554878 intermediary metabolism and respiration |
| Rv1446c | 5  | 1 | 1,56554878 intermediary metabolism and respiration |
| Rv1449c | 5  | 1 | 1,56554878 intermediary metabolism and respiration |
| Rv1703c | 10 | 2 | 1,56554878 intermediary metabolism and respiration |
| Rv1817  | 10 | 2 | 1,56554878 intermediary metabolism and respiration |
| Rv1855c | 10 | 2 | 1,56554878 intermediary metabolism and respiration |
| Rv1869c | 15 | 3 | 1,56554878 intermediary metabolism and respiration |
| Rv1880c | 5  | 1 | 1,56554878 intermediary metabolism and respiration |
| Rv2334  | 5  | 1 | 1,56554878 intermediary metabolism and respiration |
| Rv2476c | 5  | 1 | 1,56554878 intermediary metabolism and respiration |
| Rv2531c | 5  | 1 | 1,56554878 intermediary metabolism and respiration |
| Rv2702  | 5  | 1 | 1,56554878 intermediary metabolism and respiration |
| Rv3232c | 5  | 1 | 1,56554878 intermediary metabolism and respiration |
| Rv3266c | 5  | 1 | 1,56554878 intermediary metabolism and respiration |
| Rv3339c | 5  | 1 | 1,56554878 intermediary metabolism and respiration |
| Rv1178  | 19 | 4 | 1,56554878 intermediary metabolism and respiration |
| Rv1248c | 14 | 3 | 1,56554878 intermediary metabolism and respiration |
| Rv1854c | 14 | 3 | 1,56554878 intermediary metabolism and respiration |
| Rv1130  | 41 | 9 | 1,56554878 intermediary metabolism and respiration |
| Rv0693  | 9  | 2 | 1,56554878 intermediary metabolism and respiration |
| Rv1260  | 9  | 2 | 1,56554878 intermediary metabolism and respiration |
| Rv2178c | 9  | 2 | 1,56554878 intermediary metabolism and respiration |
| Rv2215  | 9  | 2 | 1,56554878 intermediary metabolism and respiration |

|         |    |   |                                                    |
|---------|----|---|----------------------------------------------------|
| Rv2900c | 9  | 2 | 1,56554878 intermediary metabolism and respiration |
| Rv3592  | 18 | 4 | 1,56554878 intermediary metabolism and respiration |
| Rv0458  | 13 | 3 | 1,56554878 intermediary metabolism and respiration |
| Rv0808  | 26 | 6 | 1,56554878 intermediary metabolism and respiration |
| Rv1915  | 21 | 5 | 1,56554878 intermediary metabolism and respiration |
| Rv2674  | 21 | 5 | 1,56554878 intermediary metabolism and respiration |
| Rv3915  | 25 | 6 | 1,56554878 intermediary metabolism and respiration |
| Rv0130  | 4  | 1 | 1,56554878 intermediary metabolism and respiration |
| Rv0133  | 8  | 2 | 1,56554878 intermediary metabolism and respiration |
| Rv0254c | 4  | 1 | 1,56554878 intermediary metabolism and respiration |
| Rv0266c | 4  | 1 | 1,56554878 intermediary metabolism and respiration |
| Rv0375c | 4  | 1 | 1,56554878 intermediary metabolism and respiration |
| Rv0389  | 4  | 1 | 1,56554878 intermediary metabolism and respiration |
| Rv0517  | 4  | 1 | 1,56554878 intermediary metabolism and respiration |
| Rv0558  | 12 | 3 | 1,56554878 intermediary metabolism and respiration |
| Rv0560c | 4  | 1 | 1,56554878 intermediary metabolism and respiration |
| Rv0761c | 8  | 2 | 1,56554878 intermediary metabolism and respiration |
| Rv0772  | 4  | 1 | 1,56554878 intermediary metabolism and respiration |
| Rv0816c | 4  | 1 | 1,56554878 intermediary metabolism and respiration |
| Rv1023  | 4  | 1 | 1,56554878 intermediary metabolism and respiration |
| Rv1093  | 4  | 1 | 1,56554878 intermediary metabolism and respiration |
| Rv1106c | 4  | 1 | 1,56554878 intermediary metabolism and respiration |
| Rv1436  | 4  | 1 | 1,56554878 intermediary metabolism and respiration |
| Rv1500  | 4  | 1 | 1,56554878 intermediary metabolism and respiration |
| Rv1526c | 4  | 1 | 1,56554878 intermediary metabolism and respiration |
| Rv1600  | 4  | 1 | 1,56554878 intermediary metabolism and respiration |
| Rv1623c | 4  | 1 | 1,56554878 intermediary metabolism and respiration |
| Rv1837c | 4  | 1 | 1,56554878 intermediary metabolism and respiration |
| Rv2122c | 4  | 1 | 1,56554878 intermediary metabolism and respiration |
| Rv2335  | 4  | 1 | 1,56554878 intermediary metabolism and respiration |
| Rv2499c | 12 | 3 | 1,56554878 intermediary metabolism and respiration |
| Rv2552c | 8  | 2 | 1,56554878 intermediary metabolism and respiration |
| Rv2667  | 12 | 3 | 1,56554878 intermediary metabolism and respiration |
| Rv2852c | 4  | 1 | 1,56554878 intermediary metabolism and respiration |

|         |   |   |                                                    |
|---------|---|---|----------------------------------------------------|
| Rv2870c | 4 | 1 | 1,56554878 intermediary metabolism and respiration |
| Rv2971  | 4 | 1 | 1,56554878 intermediary metabolism and respiration |
| Rv2984  | 4 | 1 | 1,56554878 intermediary metabolism and respiration |
| Rv3121  | 4 | 1 | 1,56554878 intermediary metabolism and respiration |
| Rv3302c | 4 | 1 | 1,56554878 intermediary metabolism and respiration |
| Rv3465  | 4 | 1 | 1,56554878 intermediary metabolism and respiration |
| Rv3742c | 4 | 1 | 1,56554878 intermediary metabolism and respiration |
| Rv0013  | 3 | 0 | 1,56554878 intermediary metabolism and respiration |
| Rv0032  | 1 | 0 | 1,56554878 intermediary metabolism and respiration |
| Rv0044c | 1 | 0 | 1,56554878 intermediary metabolism and respiration |
| Rv0062  | 0 | 0 | 1,56554878 intermediary metabolism and respiration |
| Rv0063  | 1 | 0 | 1,56554878 intermediary metabolism and respiration |
| Rv0069c | 1 | 0 | 1,56554878 intermediary metabolism and respiration |
| Rv0070c | 4 | 0 | 1,56554878 intermediary metabolism and respiration |
| Rv0083  | 1 | 0 | 1,56554878 intermediary metabolism and respiration |
| Rv0085  | 0 | 0 | 1,56554878 intermediary metabolism and respiration |
| Rv0086  | 1 | 0 | 1,56554878 intermediary metabolism and respiration |
| Rv0087  | 2 | 0 | 1,56554878 intermediary metabolism and respiration |
| Rv0111  | 1 | 0 | 1,56554878 intermediary metabolism and respiration |
| Rv0132c | 2 | 0 | 1,56554878 intermediary metabolism and respiration |
| Rv0155  | 3 | 0 | 1,56554878 intermediary metabolism and respiration |
| Rv0156  | 2 | 0 | 1,56554878 intermediary metabolism and respiration |
| Rv0183  | 1 | 0 | 1,56554878 intermediary metabolism and respiration |
| Rv0197  | 2 | 0 | 1,56554878 intermediary metabolism and respiration |
| Rv0216  | 1 | 0 | 1,56554878 intermediary metabolism and respiration |
| Rv0217c | 1 | 0 | 1,56554878 intermediary metabolism and respiration |
| Rv0224c | 1 | 0 | 1,56554878 intermediary metabolism and respiration |
| Rv0228  | 0 | 0 | 1,56554878 intermediary metabolism and respiration |
| Rv0234c | 1 | 0 | 1,56554878 intermediary metabolism and respiration |
| Rv0252  | 2 | 0 | 1,56554878 intermediary metabolism and respiration |
| Rv0294  | 1 | 0 | 1,56554878 intermediary metabolism and respiration |
| Rv0296c | 1 | 0 | 1,56554878 intermediary metabolism and respiration |
| Rv0306  | 2 | 0 | 1,56554878 intermediary metabolism and respiration |
| Rv0319  | 4 | 0 | 1,56554878 intermediary metabolism and respiration |

|         |   |   |                                                    |
|---------|---|---|----------------------------------------------------|
| Rv0322  | 1 | 0 | 1,56554878 intermediary metabolism and respiration |
| Rv0385  | 3 | 0 | 1,56554878 intermediary metabolism and respiration |
| Rv0392c | 2 | 0 | 1,56554878 intermediary metabolism and respiration |
| Rv0408  | 1 | 0 | 1,56554878 intermediary metabolism and respiration |
| Rv0414c | 0 | 0 | 1,56554878 intermediary metabolism and respiration |
| Rv0428c | 0 | 0 | 1,56554878 intermediary metabolism and respiration |
| Rv0438c | 1 | 0 | 1,56554878 intermediary metabolism and respiration |
| Rv0457c | 1 | 0 | 1,56554878 intermediary metabolism and respiration |
| Rv0480c | 0 | 0 | 1,56554878 intermediary metabolism and respiration |
| Rv0492c | 2 | 0 | 1,56554878 intermediary metabolism and respiration |
| Rv0520  | 3 | 0 | 1,56554878 intermediary metabolism and respiration |
| Rv0521  | 0 | 0 | 1,56554878 intermediary metabolism and respiration |
| Rv0524  | 1 | 0 | 1,56554878 intermediary metabolism and respiration |
| Rv0526  | 0 | 0 | 1,56554878 intermediary metabolism and respiration |
| Rv0527  | 1 | 0 | 1,56554878 intermediary metabolism and respiration |
| Rv0529  | 1 | 0 | 1,56554878 intermediary metabolism and respiration |
| Rv0534c | 0 | 0 | 1,56554878 intermediary metabolism and respiration |
| Rv0535  | 2 | 0 | 1,56554878 intermediary metabolism and respiration |
| Rv0555  | 2 | 0 | 1,56554878 intermediary metabolism and respiration |
| Rv0561c | 2 | 0 | 1,56554878 intermediary metabolism and respiration |
| Rv0565c | 1 | 0 | 1,56554878 intermediary metabolism and respiration |
| Rv0573c | 1 | 0 | 1,56554878 intermediary metabolism and respiration |
| Rv0620  | 0 | 0 | 1,56554878 intermediary metabolism and respiration |
| Rv0648  | 0 | 0 | 1,56554878 intermediary metabolism and respiration |
| Rv0650  | 0 | 0 | 1,56554878 intermediary metabolism and respiration |
| Rv0669c | 2 | 0 | 1,56554878 intermediary metabolism and respiration |
| Rv0727c | 0 | 0 | 1,56554878 intermediary metabolism and respiration |
| Rv0728c | 1 | 0 | 1,56554878 intermediary metabolism and respiration |
| Rv0729  | 1 | 0 | 1,56554878 intermediary metabolism and respiration |
| Rv0771  | 1 | 0 | 1,56554878 intermediary metabolism and respiration |
| Rv0800  | 1 | 0 | 1,56554878 intermediary metabolism and respiration |
| Rv0828c | 2 | 0 | 1,56554878 intermediary metabolism and respiration |
| Rv0858c | 0 | 0 | 1,56554878 intermediary metabolism and respiration |
| Rv0927c | 1 | 0 | 1,56554878 intermediary metabolism and respiration |

|         |   |   |                                                    |
|---------|---|---|----------------------------------------------------|
| Rv0943c | 0 | 0 | 1,56554878 intermediary metabolism and respiration |
| Rv0956  | 2 | 0 | 1,56554878 intermediary metabolism and respiration |
| Rv1011  | 1 | 0 | 1,56554878 intermediary metabolism and respiration |
| Rv1014c | 1 | 0 | 1,56554878 intermediary metabolism and respiration |
| Rv1050  | 1 | 0 | 1,56554878 intermediary metabolism and respiration |
| Rv1076  | 4 | 0 | 1,56554878 intermediary metabolism and respiration |
| Rv1089A | 0 | 0 | 1,56554878 intermediary metabolism and respiration |
| Rv1105  | 0 | 0 | 1,56554878 intermediary metabolism and respiration |
| Rv1138c | 0 | 0 | 1,56554878 intermediary metabolism and respiration |
| Rv1188  | 1 | 0 | 1,56554878 intermediary metabolism and respiration |
| Rv1263  | 2 | 0 | 1,56554878 intermediary metabolism and respiration |
| Rv1330c | 1 | 0 | 1,56554878 intermediary metabolism and respiration |
| Rv1380  | 0 | 0 | 1,56554878 intermediary metabolism and respiration |
| Rv1385  | 0 | 0 | 1,56554878 intermediary metabolism and respiration |
| Rv1399c | 2 | 0 | 1,56554878 intermediary metabolism and respiration |
| Rv1400c | 1 | 0 | 1,56554878 intermediary metabolism and respiration |
| Rv1426c | 0 | 0 | 1,56554878 intermediary metabolism and respiration |
| Rv1432  | 1 | 0 | 1,56554878 intermediary metabolism and respiration |
| Rv1470  | 4 | 0 | 1,56554878 intermediary metabolism and respiration |
| Rv1516c | 1 | 0 | 1,56554878 intermediary metabolism and respiration |
| Rv1523  | 1 | 0 | 1,56554878 intermediary metabolism and respiration |
| Rv1524  | 0 | 0 | 1,56554878 intermediary metabolism and respiration |
| Rv1552  | 3 | 0 | 1,56554878 intermediary metabolism and respiration |
| Rv1553  | 2 | 0 | 1,56554878 intermediary metabolism and respiration |
| Rv1554  | 1 | 0 | 1,56554878 intermediary metabolism and respiration |
| Rv1555  | 0 | 0 | 1,56554878 intermediary metabolism and respiration |
| Rv1620c | 1 | 0 | 1,56554878 intermediary metabolism and respiration |
| Rv1621c | 2 | 0 | 1,56554878 intermediary metabolism and respiration |
| Rv1622c | 4 | 0 | 1,56554878 intermediary metabolism and respiration |
| Rv1655  | 1 | 0 | 1,56554878 intermediary metabolism and respiration |
| Rv1659  | 1 | 0 | 1,56554878 intermediary metabolism and respiration |
| Rv1666c | 1 | 0 | 1,56554878 intermediary metabolism and respiration |
| Rv1723  | 1 | 0 | 1,56554878 intermediary metabolism and respiration |
| Rv1745c | 0 | 0 | 1,56554878 intermediary metabolism and respiration |



|         |   |   |                                                    |
|---------|---|---|----------------------------------------------------|
| Rv1755c | 2 | 0 | 1,56554878 intermediary metabolism and respiration |
| Rv1777  | 1 | 0 | 1,56554878 intermediary metabolism and respiration |
| Rv1781c | 1 | 0 | 1,56554878 intermediary metabolism and respiration |
| Rv1851  | 1 | 0 | 1,56554878 intermediary metabolism and respiration |
| Rv1865c | 2 | 0 | 1,56554878 intermediary metabolism and respiration |
| Rv1940  | 3 | 0 | 1,56554878 intermediary metabolism and respiration |
| Rv2064  | 0 | 0 | 1,56554878 intermediary metabolism and respiration |
| Rv2071c | 1 | 0 | 1,56554878 intermediary metabolism and respiration |
| Rv2073c | 2 | 0 | 1,56554878 intermediary metabolism and respiration |
| Rv2129c | 2 | 0 | 1,56554878 intermediary metabolism and respiration |
| Rv2139  | 1 | 0 | 1,56554878 intermediary metabolism and respiration |
| Rv2170  | 2 | 0 | 1,56554878 intermediary metabolism and respiration |
| Rv2192c | 2 | 0 | 1,56554878 intermediary metabolism and respiration |
| Rv2208  | 1 | 0 | 1,56554878 intermediary metabolism and respiration |
| Rv2213  | 2 | 0 | 1,56554878 intermediary metabolism and respiration |
| Rv2231c | 1 | 0 | 1,56554878 intermediary metabolism and respiration |
| Rv2236c | 1 | 0 | 1,56554878 intermediary metabolism and respiration |
| Rv2263  | 2 | 0 | 1,56554878 intermediary metabolism and respiration |
| Rv2268c | 0 | 0 | 1,56554878 intermediary metabolism and respiration |
| Rv2276  | 0 | 0 | 1,56554878 intermediary metabolism and respiration |
| Rv2277c | 0 | 0 | 1,56554878 intermediary metabolism and respiration |
| Rv2284  | 3 | 0 | 1,56554878 intermediary metabolism and respiration |
| Rv2294  | 1 | 0 | 1,56554878 intermediary metabolism and respiration |
| Rv2322c | 2 | 0 | 1,56554878 intermediary metabolism and respiration |
| Rv2349c | 1 | 0 | 1,56554878 intermediary metabolism and respiration |
| Rv2350c | 0 | 0 | 1,56554878 intermediary metabolism and respiration |
| Rv2351c | 2 | 0 | 1,56554878 intermediary metabolism and respiration |
| Rv2364c | 2 | 0 | 1,56554878 intermediary metabolism and respiration |
| Rv2458  | 0 | 0 | 1,56554878 intermediary metabolism and respiration |
| Rv2579  | 2 | 0 | 1,56554878 intermediary metabolism and respiration |
| Rv2601  | 1 | 0 | 1,56554878 intermediary metabolism and respiration |
| Rv2607  | 4 | 0 | 1,56554878 intermediary metabolism and respiration |
| Rv2701c | 2 | 0 | 1,56554878 intermediary metabolism and respiration |
| Rv2754c | 0 | 0 | 1,56554878 intermediary metabolism and respiration |

|         |   |   |                                                    |
|---------|---|---|----------------------------------------------------|
| Rv2766c | 1 | 0 | 1,56554878 intermediary metabolism and respiration |
| Rv2874  | 3 | 0 | 1,56554878 intermediary metabolism and respiration |
| Rv2893  | 1 | 0 | 1,56554878 intermediary metabolism and respiration |
| Rv2922A | 1 | 0 | 1,56554878 intermediary metabolism and respiration |
| Rv2958c | 3 | 0 | 1,56554878 intermediary metabolism and respiration |
| Rv2964  | 4 | 0 | 1,56554878 intermediary metabolism and respiration |
| Rv2966c | 0 | 0 | 1,56554878 intermediary metabolism and respiration |
| Rv2997  | 0 | 0 | 1,56554878 intermediary metabolism and respiration |
| Rv3032  | 0 | 0 | 1,56554878 intermediary metabolism and respiration |
| Rv3077  | 2 | 0 | 1,56554878 intermediary metabolism and respiration |
| Rv3078  | 3 | 0 | 1,56554878 intermediary metabolism and respiration |
| Rv3083  | 2 | 0 | 1,56554878 intermediary metabolism and respiration |
| Rv3084  | 0 | 0 | 1,56554878 intermediary metabolism and respiration |
| Rv3109  | 1 | 0 | 1,56554878 intermediary metabolism and respiration |
| Rv3110  | 1 | 0 | 1,56554878 intermediary metabolism and respiration |
| Rv3111  | 1 | 0 | 1,56554878 intermediary metabolism and respiration |
| Rv3112  | 1 | 0 | 1,56554878 intermediary metabolism and respiration |
| Rv3113  | 0 | 0 | 1,56554878 intermediary metabolism and respiration |
| Rv3153  | 3 | 0 | 1,56554878 intermediary metabolism and respiration |
| Rv3155  | 1 | 0 | 1,56554878 intermediary metabolism and respiration |
| Rv3174  | 4 | 0 | 1,56554878 intermediary metabolism and respiration |
| Rv3175  | 1 | 0 | 1,56554878 intermediary metabolism and respiration |
| Rv3215  | 1 | 0 | 1,56554878 intermediary metabolism and respiration |
| Rv3216  | 1 | 0 | 1,56554878 intermediary metabolism and respiration |
| Rv3247c | 4 | 0 | 1,56554878 intermediary metabolism and respiration |
| Rv3262  | 1 | 0 | 1,56554878 intermediary metabolism and respiration |
| Rv3276c | 2 | 0 | 1,56554878 intermediary metabolism and respiration |
| Rv3293  | 1 | 0 | 1,56554878 intermediary metabolism and respiration |
| Rv3307  | 3 | 0 | 1,56554878 intermediary metabolism and respiration |
| Rv3308  | 0 | 0 | 1,56554878 intermediary metabolism and respiration |
| Rv3313c | 1 | 0 | 1,56554878 intermediary metabolism and respiration |
| Rv3314c | 1 | 0 | 1,56554878 intermediary metabolism and respiration |
| Rv3315c | 2 | 0 | 1,56554878 intermediary metabolism and respiration |
| Rv3317  | 2 | 0 | 1,56554878 intermediary metabolism and respiration |

|         |   |   |                                                    |
|---------|---|---|----------------------------------------------------|
| Rv3318  | 0 | 0 | 1,56554878 intermediary metabolism and respiration |
| Rv3322c | 2 | 0 | 1,56554878 intermediary metabolism and respiration |
| Rv3324c | 2 | 0 | 1,56554878 intermediary metabolism and respiration |
| Rv3329  | 0 | 0 | 1,56554878 intermediary metabolism and respiration |
| Rv3359  | 1 | 0 | 1,56554878 intermediary metabolism and respiration |
| Rv3368c | 0 | 0 | 1,56554878 intermediary metabolism and respiration |
| Rv3375  | 1 | 0 | 1,56554878 intermediary metabolism and respiration |
| Rv3378c | 1 | 0 | 1,56554878 intermediary metabolism and respiration |
| Rv3397c | 2 | 0 | 1,56554878 intermediary metabolism and respiration |
| Rv3432c | 1 | 0 | 1,56554878 intermediary metabolism and respiration |
| Rv3449  | 0 | 0 | 1,56554878 intermediary metabolism and respiration |
| Rv3468c | 0 | 0 | 1,56554878 intermediary metabolism and respiration |
| Rv3470c | 1 | 0 | 1,56554878 intermediary metabolism and respiration |
| Rv3525c | 3 | 0 | 1,56554878 intermediary metabolism and respiration |
| Rv3551  | 1 | 0 | 1,56554878 intermediary metabolism and respiration |
| Rv3552  | 0 | 0 | 1,56554878 intermediary metabolism and respiration |
| Rv3553  | 0 | 0 | 1,56554878 intermediary metabolism and respiration |
| Rv3554  | 0 | 0 | 1,56554878 intermediary metabolism and respiration |
| Rv3559c | 2 | 0 | 1,56554878 intermediary metabolism and respiration |
| Rv3565  | 0 | 0 | 1,56554878 intermediary metabolism and respiration |
| Rv3566c | 1 | 0 | 1,56554878 intermediary metabolism and respiration |
| Rv3591c | 0 | 0 | 1,56554878 intermediary metabolism and respiration |
| Rv3618  | 1 | 0 | 1,56554878 intermediary metabolism and respiration |
| Rv3634c | 1 | 0 | 1,56554878 intermediary metabolism and respiration |
| Rv3668c | 4 | 0 | 1,56554878 intermediary metabolism and respiration |
| Rv3700c | 1 | 0 | 1,56554878 intermediary metabolism and respiration |
| Rv3727  | 1 | 0 | 1,56554878 intermediary metabolism and respiration |
| Rv3729  | 1 | 0 | 1,56554878 intermediary metabolism and respiration |
| Rv3741c | 2 | 0 | 1,56554878 intermediary metabolism and respiration |
| Rv3754  | 1 | 0 | 1,56554878 intermediary metabolism and respiration |
| Rv3772  | 0 | 0 | 1,56554878 intermediary metabolism and respiration |
| Rv3775  | 1 | 0 | 1,56554878 intermediary metabolism and respiration |
| Rv3816c | 4 | 0 | 1,56554878 intermediary metabolism and respiration |
| Rv3817  | 0 | 0 | 1,56554878 intermediary metabolism and respiration |

|         |     |    |             |                                         |
|---------|-----|----|-------------|-----------------------------------------|
| Rv3829c | 4   | 0  | 1,56554878  | intermediary metabolism and respiration |
| Rv3886c | 1   | 0  | 1,56554878  | intermediary metabolism and respiration |
| Rv1046c | 67  | 5  | 0,084855057 | unknown                                 |
| Rv0325  | 24  | 1  | 0,514657183 | unknown                                 |
| Rv2292c | 0   | 1  | 0,891983427 | unknown                                 |
| Rv1506c | 10  | 0  | 0,942423529 | unknown                                 |
| Rv2348c | 30  | 5  | 1,102355081 | unknown                                 |
| Rv2084  | 1   | 1  | 1,155519357 | unknown                                 |
| Rv1509  | 2   | 1  | 1,177742083 | unknown                                 |
| Rv0326  | 3   | 1  | 1,180692338 | unknown                                 |
| Rv1742  | 3   | 1  | 1,180692338 | unknown                                 |
| Rv1502  | 4   | 2  | 1,186675548 | unknown                                 |
| Rv2645  | 4   | 1  | 1,56554878  | unknown                                 |
| Rv1507A | 2   | 0  | 1,56554878  | unknown                                 |
| Rv2818c | 1   | 0  | 1,56554878  | unknown                                 |
| Rv3599c | 4   | 0  | 1,56554878  | unknown                                 |
| Rv0823c | 58  | 4  | 0,11328311  | regulatory proteins                     |
| Rv3862c | 42  | 2  | 0,13705345  | regulatory proteins                     |
| Rv2160A | 30  | 16 | 0,162789799 | regulatory proteins                     |
| Rv2711  | 165 | 25 | 0,27409932  | regulatory proteins                     |
| Rv3574  | 28  | 1  | 0,291874338 | regulatory proteins                     |
| Rv0135c | 41  | 3  | 0,318762337 | regulatory proteins                     |
| Rv1460  | 20  | 11 | 0,332317467 | regulatory proteins                     |
| Rv0931c | 12  | 8  | 0,346184583 | regulatory proteins                     |
| Rv2887  | 6   | 5  | 0,380970124 | regulatory proteins                     |
| Rv2258c | 2   | 3  | 0,422118767 | regulatory proteins                     |
| Rv2017  | 7   | 5  | 0,485900548 | regulatory proteins                     |
| Rv3208  | 5   | 4  | 0,552732111 | regulatory proteins                     |
| Rv2642  | 24  | 11 | 0,591593706 | regulatory proteins                     |
| Rv3058c | 13  | 0  | 0,601558311 | regulatory proteins                     |
| Rv2640c | 21  | 1  | 0,615300438 | regulatory proteins                     |
| Rv0195  | 20  | 1  | 0,616502504 | regulatory proteins                     |
| Rv1152  | 19  | 9  | 0,628550418 | regulatory proteins                     |
| Rv0328  | 11  | 0  | 0,766641622 | regulatory proteins                     |

|         |     |    |                                 |
|---------|-----|----|---------------------------------|
| Rv3833  | 12  | 0  | 0,768877005 regulatory proteins |
| Rv1379  | 4   | 3  | 0,787843454 regulatory proteins |
| Rv3764c | 4   | 3  | 0,787843454 regulatory proteins |
| Rv0903c | 25  | 2  | 0,789455172 regulatory proteins |
| Rv1167c | 25  | 2  | 0,789455172 regulatory proteins |
| Rv3405c | 26  | 2  | 0,800435931 regulatory proteins |
| Rv1479  | 15  | 7  | 0,815433256 regulatory proteins |
| Rv3260c | 19  | 1  | 0,823208877 regulatory proteins |
| Rv2034  | 37  | 14 | 0,832297917 regulatory proteins |
| Rv0744c | 22  | 2  | 0,883477824 regulatory proteins |
| Rv1019  | 16  | 7  | 0,883856716 regulatory proteins |
| Rv0153c | 0   | 1  | 0,891983427 regulatory proteins |
| Rv1657  | 0   | 1  | 0,891983427 regulatory proteins |
| Rv1423  | 2   | 2  | 0,902076825 regulatory proteins |
| Rv3183  | 2   | 2  | 0,902076825 regulatory proteins |
| Rv1255c | 16  | 1  | 0,937059063 regulatory proteins |
| Rv3095  | 16  | 1  | 0,937059063 regulatory proteins |
| Rv3160c | 10  | 0  | 0,942423529 regulatory proteins |
| Rv0324  | 17  | 1  | 0,945295065 regulatory proteins |
| Rv1719  | 7   | 0  | 0,965258939 regulatory proteins |
| Rv1626  | 13  | 5  | 0,979843859 regulatory proteins |
| Rv0018c | 8   | 0  | 0,980645136 regulatory proteins |
| Rv0377  | 3   | 2  | 1,017645149 regulatory proteins |
| Rv0348  | 12  | 1  | 1,031469845 regulatory proteins |
| Rv0465c | 12  | 1  | 1,031469845 regulatory proteins |
| Rv3681c | 25  | 9  | 1,052021455 regulatory proteins |
| Rv3060c | 28  | 4  | 1,053965333 regulatory proteins |
| Rv2745c | 330 | 71 | 1,0552425 regulatory proteins   |
| Rv2788  | 11  | 4  | 1,075323219 regulatory proteins |
| Rv0144  | 9   | 4  | 1,090043564 regulatory proteins |
| Rv2175c | 5   | 0  | 1,093861497 regulatory proteins |
| Rv3055  | 5   | 0  | 1,093861497 regulatory proteins |
| Rv3173c | 21  | 3  | 1,097160937 regulatory proteins |
| Rv0078  | 14  | 1  | 1,106515077 regulatory proteins |

|         |     |    |                                 |
|---------|-----|----|---------------------------------|
| Rv0023  | 6   | 0  | 1,107198572 regulatory proteins |
| Rv0653c | 6   | 0  | 1,107198572 regulatory proteins |
| Rv1049  | 6   | 0  | 1,107198572 regulatory proteins |
| Rv3830c | 6   | 0  | 1,107198572 regulatory proteins |
| Rv0586  | 268 | 70 | 1,109989899 regulatory proteins |
| Rv3220c | 18  | 7  | 1,121058282 regulatory proteins |
| Rv0273c | 15  | 1  | 1,126699026 regulatory proteins |
| Rv0681  | 5   | 2  | 1,132270883 regulatory proteins |
| Rv2359  | 5   | 2  | 1,132270883 regulatory proteins |
| Rv3246c | 23  | 3  | 1,132864773 regulatory proteins |
| Rv1994c | 35  | 6  | 1,142666132 regulatory proteins |
| Rv1773c | 8   | 3  | 1,143564814 regulatory proteins |
| Rv0485  | 27  | 8  | 1,147181765 regulatory proteins |
| Rv1743  | 6   | 2  | 1,154704835 regulatory proteins |
| Rv2884  | 6   | 2  | 1,154704835 regulatory proteins |
| Rv0042c | 1   | 1  | 1,155519357 regulatory proteins |
| Rv0196  | 1   | 1  | 1,155519357 regulatory proteins |
| Rv0737  | 1   | 1  | 1,155519357 regulatory proteins |
| Rv0844c | 1   | 1  | 1,155519357 regulatory proteins |
| Rv0845  | 1   | 1  | 1,155519357 regulatory proteins |
| Rv1267c | 1   | 1  | 1,155519357 regulatory proteins |
| Rv1358  | 1   | 1  | 1,155519357 regulatory proteins |
| Rv2088  | 1   | 1  | 1,155519357 regulatory proteins |
| Rv3575c | 1   | 1  | 1,155519357 regulatory proteins |
| Rv3853  | 1   | 1  | 1,155519357 regulatory proteins |
| Rv1395  | 28  | 8  | 1,155976087 regulatory proteins |
| Rv0238  | 10  | 1  | 1,169814587 regulatory proteins |
| Rv0691c | 10  | 1  | 1,169814587 regulatory proteins |
| Rv3245c | 9   | 1  | 1,171820425 regulatory proteins |
| Rv1332  | 33  | 9  | 1,172754192 regulatory proteins |
| Rv0117  | 2   | 1  | 1,177742083 regulatory proteins |
| Rv1028c | 2   | 1  | 1,177742083 regulatory proteins |
| Rv1129c | 2   | 1  | 1,177742083 regulatory proteins |
| Rv1266c | 2   | 1  | 1,177742083 regulatory proteins |

|         |    |   |                                 |
|---------|----|---|---------------------------------|
| Rv1931c | 2  | 1 | 1,177742083 regulatory proteins |
| Rv2324  | 2  | 1 | 1,177742083 regulatory proteins |
| Rv3197A | 2  | 1 | 1,177742083 regulatory proteins |
| Rv0880  | 3  | 1 | 1,180692338 regulatory proteins |
| Rv0902c | 3  | 1 | 1,180692338 regulatory proteins |
| Rv2176  | 3  | 1 | 1,180692338 regulatory proteins |
| Rv2234  | 3  | 1 | 1,180692338 regulatory proteins |
| Rv2914c | 3  | 1 | 1,180692338 regulatory proteins |
| Rv3164c | 3  | 1 | 1,180692338 regulatory proteins |
| Rv3744  | 3  | 1 | 1,180692338 regulatory proteins |
| Rv3132c | 4  | 2 | 1,186675548 regulatory proteins |
| Rv1985c | 46 | 9 | 1,191417577 regulatory proteins |
| Rv1404  | 13 | 2 | 1,215391325 regulatory proteins |
| Rv0472c | 13 | 4 | 1,218883666 regulatory proteins |
| Rv0020c | 15 | 4 | 1,243303357 regulatory proteins |
| Rv1846c | 19 | 5 | 1,267811055 regulatory proteins |
| Rv3295  | 21 | 4 | 1,276017761 regulatory proteins |
| Rv2358  | 23 | 4 | 1,278009252 regulatory proteins |
| Rv3050c | 30 | 6 | 1,312168518 regulatory proteins |
| Rv2621c | 28 | 7 | 1,312544576 regulatory proteins |
| Rv1534  | 8  | 1 | 1,56554878 regulatory proteins  |
| Rv1963c | 8  | 1 | 1,56554878 regulatory proteins  |
| Rv0043c | 6  | 1 | 1,56554878 regulatory proteins  |
| Rv0158  | 6  | 1 | 1,56554878 regulatory proteins  |
| Rv0576  | 6  | 1 | 1,56554878 regulatory proteins  |
| Rv2720  | 6  | 1 | 1,56554878 regulatory proteins  |
| Rv2989  | 6  | 1 | 1,56554878 regulatory proteins  |
| Rv0019c | 16 | 3 | 1,56554878 regulatory proteins  |
| Rv0165c | 5  | 1 | 1,56554878 regulatory proteins  |
| Rv0491  | 20 | 4 | 1,56554878 regulatory proteins  |
| Rv1033c | 5  | 1 | 1,56554878 regulatory proteins  |
| Rv1151c | 5  | 1 | 1,56554878 regulatory proteins  |
| Rv1674c | 5  | 1 | 1,56554878 regulatory proteins  |
| Rv1776c | 5  | 1 | 1,56554878 regulatory proteins  |

|         |    |    |                                |
|---------|----|----|--------------------------------|
| Rv3557c | 5  | 1  | 1,56554878 regulatory proteins |
| Rv3849  | 5  | 1  | 1,56554878 regulatory proteins |
| Rv0490  | 23 | 5  | 1,56554878 regulatory proteins |
| Rv0212c | 9  | 2  | 1,56554878 regulatory proteins |
| Rv0757  | 45 | 10 | 1,56554878 regulatory proteins |
| Rv0981  | 27 | 6  | 1,56554878 regulatory proteins |
| Rv0818  | 31 | 7  | 1,56554878 regulatory proteins |
| Rv0474  | 22 | 5  | 1,56554878 regulatory proteins |
| Rv1473A | 22 | 5  | 1,56554878 regulatory proteins |
| Rv0758  | 21 | 5  | 1,56554878 regulatory proteins |
| Rv2021c | 25 | 6  | 1,56554878 regulatory proteins |
| Rv1909c | 29 | 7  | 1,56554878 regulatory proteins |
| Rv0015c | 4  | 1  | 1,56554878 regulatory proteins |
| Rv0410c | 4  | 1  | 1,56554878 regulatory proteins |
| Rv1556  | 4  | 1  | 1,56554878 regulatory proteins |
| Rv1816  | 8  | 2  | 1,56554878 regulatory proteins |
| Rv2779c | 4  | 1  | 1,56554878 regulatory proteins |
| Rv3080c | 4  | 1  | 1,56554878 regulatory proteins |
| Rv3676  | 12 | 3  | 1,56554878 regulatory proteins |
| Rv3736  | 8  | 2  | 1,56554878 regulatory proteins |
| Rv0014c | 3  | 0  | 1,56554878 regulatory proteins |
| Rv0022c | 1  | 0  | 1,56554878 regulatory proteins |
| Rv0067c | 3  | 0  | 1,56554878 regulatory proteins |
| Rv0260c | 2  | 0  | 1,56554878 regulatory proteins |
| Rv0339c | 1  | 0  | 1,56554878 regulatory proteins |
| Rv0386  | 4  | 0  | 1,56554878 regulatory proteins |
| Rv0452  | 3  | 0  | 1,56554878 regulatory proteins |
| Rv0494  | 1  | 0  | 1,56554878 regulatory proteins |
| Rv0600c | 0  | 0  | 1,56554878 regulatory proteins |
| Rv0601c | 0  | 0  | 1,56554878 regulatory proteins |
| Rv0602c | 1  | 0  | 1,56554878 regulatory proteins |
| Rv0890c | 1  | 0  | 1,56554878 regulatory proteins |
| Rv0891c | 4  | 0  | 1,56554878 regulatory proteins |
| Rv0894  | 1  | 0  | 1,56554878 regulatory proteins |



|         |     |    |                                     |
|---------|-----|----|-------------------------------------|
| Rv1027c | 1   | 0  | 1,56554878 regulatory proteins      |
| Rv1032c | 0   | 0  | 1,56554878 regulatory proteins      |
| Rv1219c | 2   | 0  | 1,56554878 regulatory proteins      |
| Rv1353c | 1   | 0  | 1,56554878 regulatory proteins      |
| Rv1359  | 1   | 0  | 1,56554878 regulatory proteins      |
| Rv1453  | 1   | 0  | 1,56554878 regulatory proteins      |
| Rv1474c | 3   | 0  | 1,56554878 regulatory proteins      |
| Rv1675c | 2   | 0  | 1,56554878 regulatory proteins      |
| Rv1746  | 1   | 0  | 1,56554878 regulatory proteins      |
| Rv2027c | 2   | 0  | 1,56554878 regulatory proteins      |
| Rv2160c | 0   | 0  | 1,56554878 regulatory proteins      |
| Rv2232  | 1   | 0  | 1,56554878 regulatory proteins      |
| Rv2250c | 3   | 0  | 1,56554878 regulatory proteins      |
| Rv2282c | 1   | 0  | 1,56554878 regulatory proteins      |
| Rv2488c | 3   | 0  | 1,56554878 regulatory proteins      |
| Rv2506  | 3   | 0  | 1,56554878 regulatory proteins      |
| Rv3066  | 2   | 0  | 1,56554878 regulatory proteins      |
| Rv3124  | 1   | 0  | 1,56554878 regulatory proteins      |
| Rv3143  | 3   | 0  | 1,56554878 regulatory proteins      |
| Rv3167c | 4   | 0  | 1,56554878 regulatory proteins      |
| Rv3291c | 2   | 0  | 1,56554878 regulatory proteins      |
| Rv3692  | 2   | 0  | 1,56554878 regulatory proteins      |
| Rv3840  | 3   | 0  | 1,56554878 regulatory proteins      |
| Rv3288c | 144 | 17 | 0,054803763 conserved hypotheticals |
| Rv1048c | 38  | 1  | 0,058161426 conserved hypotheticals |
| Rv2664  | 55  | 3  | 0,058818431 conserved hypotheticals |
| Rv1558  | 2   | 5  | 0,060235783 conserved hypotheticals |
| Rv0767c | 39  | 1  | 0,060356 conserved hypotheticals    |
| Rv0790c | 39  | 1  | 0,060356 conserved hypotheticals    |
| Rv2557  | 21  | 14 | 0,063402986 conserved hypotheticals |
| Rv0459  | 29  | 17 | 0,066988731 conserved hypotheticals |
| Rv3047c | 27  | 0  | 0,076870435 conserved hypotheticals |
| Rv2825c | 27  | 16 | 0,079469923 conserved hypotheticals |
| Rv1486c | 6   | 7  | 0,079826219 conserved hypotheticals |

|         |     |    |                                     |
|---------|-----|----|-------------------------------------|
| Rv0106  | 1   | 4  | 0,080382111 conserved hypotheticals |
| Rv1057  | 1   | 4  | 0,080382111 conserved hypotheticals |
| Rv2433c | 0   | 3  | 0,094731 conserved hypotheticals    |
| Rv2660c | 0   | 3  | 0,094731 conserved hypotheticals    |
| Rv2159c | 11  | 9  | 0,10429684 conserved hypotheticals  |
| Rv2452c | 24  | 0  | 0,109994579 conserved hypotheticals |
| Rv2295  | 56  | 4  | 0,11045672 conserved hypotheticals  |
| Rv1766  | 34  | 1  | 0,112805173 conserved hypotheticals |
| Rv2204c | 242 | 82 | 0,113240098 conserved hypotheticals |
| Rv2076c | 100 | 11 | 0,132757067 conserved hypotheticals |
| Rv2630  | 16  | 11 | 0,13916898 conserved hypotheticals  |
| Rv2255c | 10  | 8  | 0,159716207 conserved hypotheticals |
| Rv2012  | 32  | 1  | 0,160058098 conserved hypotheticals |
| Rv3076  | 8   | 7  | 0,174733036 conserved hypotheticals |
| Rv1684  | 2   | 4  | 0,176306516 conserved hypotheticals |
| Rv2004c | 2   | 4  | 0,176306516 conserved hypotheticals |
| Rv2079  | 2   | 4  | 0,176306516 conserved hypotheticals |
| Rv1593c | 46  | 3  | 0,189583102 conserved hypotheticals |
| Rv0572c | 4   | 5  | 0,191150027 conserved hypotheticals |
| Rv3920c | 23  | 13 | 0,198662011 conserved hypotheticals |
| Rv1829  | 11  | 8  | 0,209271414 conserved hypotheticals |
| Rv0332  | 20  | 0  | 0,227845773 conserved hypotheticals |
| Rv0177  | 9   | 7  | 0,23647066 conserved hypotheticals  |
| Rv1907c | 9   | 7  | 0,23647066 conserved hypotheticals  |
| Rv0750  | 13  | 9  | 0,256217481 conserved hypotheticals |
| Rv0813c | 13  | 9  | 0,256217481 conserved hypotheticals |
| Rv1691  | 1   | 3  | 0,257111256 conserved hypotheticals |
| Rv1950c | 62  | 6  | 0,285572258 conserved hypotheticals |
| Rv1321  | 5   | 5  | 0,286174169 conserved hypotheticals |
| Rv0029  | 3   | 4  | 0,292939524 conserved hypotheticals |
| Rv0100  | 3   | 4  | 0,292939524 conserved hypotheticals |
| Rv2230c | 3   | 4  | 0,292939524 conserved hypotheticals |
| Rv2641  | 42  | 3  | 0,324705835 conserved hypotheticals |
| Rv2050  | 117 | 16 | 0,327101762 conserved hypotheticals |

|         |     |    |                                     |
|---------|-----|----|-------------------------------------|
| Rv1590  | 19  | 0  | 0,327370419 conserved hypotheticals |
| Rv2665  | 25  | 13 | 0,330258031 conserved hypotheticals |
| Rv2331  | 8   | 6  | 0,33098 conserved hypotheticals     |
| Rv3376  | 8   | 6  | 0,33098 conserved hypotheticals     |
| Rv0613c | 0   | 2  | 0,334966855 conserved hypotheticals |
| Rv1147  | 0   | 2  | 0,334966855 conserved hypotheticals |
| Rv3654c | 0   | 2  | 0,334966855 conserved hypotheticals |
| Rv3655c | 0   | 2  | 0,334966855 conserved hypotheticals |
| Rv1831  | 44  | 19 | 0,335069913 conserved hypotheticals |
| Rv3603c | 32  | 2  | 0,403010379 conserved hypotheticals |
| Rv3189  | 22  | 11 | 0,404187525 conserved hypotheticals |
| Rv3642c | 85  | 11 | 0,412861931 conserved hypotheticals |
| Rv1209  | 4   | 4  | 0,413484436 conserved hypotheticals |
| Rv2143  | 4   | 4  | 0,413484436 conserved hypotheticals |
| Rv2183c | 4   | 4  | 0,413484436 conserved hypotheticals |
| Rv3015c | 4   | 4  | 0,413484436 conserved hypotheticals |
| Rv2432c | 2   | 3  | 0,422118767 conserved hypotheticals |
| Rv2449c | 2   | 3  | 0,422118767 conserved hypotheticals |
| Rv2896c | 2   | 3  | 0,422118767 conserved hypotheticals |
| Rv3703c | 2   | 3  | 0,422118767 conserved hypotheticals |
| Rv1871c | 113 | 39 | 0,479693798 conserved hypotheticals |
| Rv2631  | 7   | 5  | 0,485900548 conserved hypotheticals |
| Rv0609A | 31  | 2  | 0,530802522 conserved hypotheticals |
| Rv0634A | 12  | 7  | 0,538915113 conserved hypotheticals |
| Rv1772  | 18  | 9  | 0,588975797 conserved hypotheticals |
| Rv2165c | 14  | 0  | 0,602437508 conserved hypotheticals |
| Rv0313  | 139 | 45 | 0,613142265 conserved hypotheticals |
| Rv2633c | 20  | 1  | 0,616502504 conserved hypotheticals |
| Rv3008  | 15  | 0  | 0,616531826 conserved hypotheticals |
| Rv3463  | 15  | 0  | 0,616531826 conserved hypotheticals |
| Rv1827  | 110 | 37 | 0,620499839 conserved hypotheticals |
| Rv0738  | 3   | 3  | 0,62647 conserved hypotheticals     |
| Rv2020c | 3   | 3  | 0,62647 conserved hypotheticals     |
| Rv3850  | 3   | 3  | 0,62647 conserved hypotheticals     |

|         |    |    |                                     |
|---------|----|----|-------------------------------------|
| Rv3633  | 19 | 9  | 0,628550418 conserved hypotheticals |
| Rv3205c | 74 | 10 | 0,63345885 conserved hypotheticals  |
| Rv3527  | 22 | 1  | 0,636710275 conserved hypotheticals |
| Rv0209  | 1  | 2  | 0,643390112 conserved hypotheticals |
| Rv0449c | 1  | 2  | 0,643390112 conserved hypotheticals |
| Rv0760c | 1  | 2  | 0,643390112 conserved hypotheticals |
| Rv0926c | 1  | 2  | 0,643390112 conserved hypotheticals |
| Rv1422  | 1  | 2  | 0,643390112 conserved hypotheticals |
| Rv1732c | 1  | 2  | 0,643390112 conserved hypotheticals |
| Rv1778c | 1  | 2  | 0,643390112 conserved hypotheticals |
| Rv2044c | 1  | 2  | 0,643390112 conserved hypotheticals |
| Rv2680  | 1  | 2  | 0,643390112 conserved hypotheticals |
| Rv2752c | 1  | 2  | 0,643390112 conserved hypotheticals |
| Rv2822c | 1  | 2  | 0,643390112 conserved hypotheticals |
| Rv3196A | 1  | 2  | 0,643390112 conserved hypotheticals |
| Rv3224B | 1  | 2  | 0,643390112 conserved hypotheticals |
| Rv3706c | 1  | 2  | 0,643390112 conserved hypotheticals |
| Rv3182  | 6  | 4  | 0,654786705 conserved hypotheticals |
| Rv1767  | 39 | 4  | 0,699344993 conserved hypotheticals |
| Rv2676c | 12 | 6  | 0,764406961 conserved hypotheticals |
| Rv0743c | 11 | 0  | 0,766641622 conserved hypotheticals |
| Rv2472  | 11 | 0  | 0,766641622 conserved hypotheticals |
| Rv3122  | 11 | 0  | 0,766641622 conserved hypotheticals |
| Rv2302  | 18 | 8  | 0,771275632 conserved hypotheticals |
| Rv0276  | 77 | 26 | 0,776722689 conserved hypotheticals |
| Rv2256c | 65 | 23 | 0,782530909 conserved hypotheticals |
| Rv1232c | 4  | 3  | 0,787843454 conserved hypotheticals |
| Rv1421  | 4  | 3  | 0,787843454 conserved hypotheticals |
| Rv2313c | 4  | 3  | 0,787843454 conserved hypotheticals |
| Rv2898c | 4  | 3  | 0,787843454 conserved hypotheticals |
| Rv3126c | 4  | 3  | 0,787843454 conserved hypotheticals |
| Rv3364c | 4  | 3  | 0,787843454 conserved hypotheticals |
| Rv3683  | 4  | 3  | 0,787843454 conserved hypotheticals |
| Rv3766  | 4  | 3  | 0,787843454 conserved hypotheticals |

|         |    |    |                                     |
|---------|----|----|-------------------------------------|
| Rv0759c | 44 | 5  | 0,790083598 conserved hypotheticals |
| Rv0293c | 8  | 5  | 0,81076095 conserved hypotheticals  |
| Rv0810c | 48 | 17 | 0,858459818 conserved hypotheticals |
| Rv3863  | 36 | 4  | 0,862573575 conserved hypotheticals |
| Rv0122  | 9  | 5  | 0,879377032 conserved hypotheticals |
| Rv0108c | 23 | 2  | 0,879736108 conserved hypotheticals |
| Rv2632c | 36 | 13 | 0,879920829 conserved hypotheticals |
| Rv1598c | 22 | 2  | 0,883477824 conserved hypotheticals |
| Rv2369c | 22 | 2  | 0,883477824 conserved hypotheticals |
| Rv3172c | 22 | 2  | 0,883477824 conserved hypotheticals |
| Rv0311  | 5  | 3  | 0,890066667 conserved hypotheticals |
| Rv0874c | 5  | 3  | 0,890066667 conserved hypotheticals |
| Rv1059  | 5  | 3  | 0,890066667 conserved hypotheticals |
| Rv1804c | 5  | 3  | 0,890066667 conserved hypotheticals |
| Rv1919c | 5  | 3  | 0,890066667 conserved hypotheticals |
| Rv2551c | 5  | 3  | 0,890066667 conserved hypotheticals |
| Rv3098c | 34 | 13 | 0,890680717 conserved hypotheticals |
| Rv0310c | 0  | 1  | 0,891983427 conserved hypotheticals |
| Rv0360c | 0  | 1  | 0,891983427 conserved hypotheticals |
| Rv0597c | 0  | 1  | 0,891983427 conserved hypotheticals |
| Rv0787  | 0  | 1  | 0,891983427 conserved hypotheticals |
| Rv1179c | 0  | 1  | 0,891983427 conserved hypotheticals |
| Rv1290A | 0  | 1  | 0,891983427 conserved hypotheticals |
| Rv1513  | 0  | 1  | 0,891983427 conserved hypotheticals |
| Rv1676  | 0  | 1  | 0,891983427 conserved hypotheticals |
| Rv1734c | 0  | 1  | 0,891983427 conserved hypotheticals |
| Rv2260  | 0  | 1  | 0,891983427 conserved hypotheticals |
| Rv2451  | 0  | 1  | 0,891983427 conserved hypotheticals |
| Rv2998A | 0  | 1  | 0,891983427 conserved hypotheticals |
| Rv3013  | 0  | 1  | 0,891983427 conserved hypotheticals |
| Rv3192  | 0  | 1  | 0,891983427 conserved hypotheticals |
| Rv3446c | 0  | 1  | 0,891983427 conserved hypotheticals |
| Rv3492c | 0  | 1  | 0,891983427 conserved hypotheticals |
| Rv3702c | 0  | 1  | 0,891983427 conserved hypotheticals |

|         |    |   |                                     |
|---------|----|---|-------------------------------------|
| Rv0004  | 2  | 2 | 0,902076825 conserved hypotheticals |
| Rv0784  | 2  | 2 | 0,902076825 conserved hypotheticals |
| Rv0785  | 2  | 2 | 0,902076825 conserved hypotheticals |
| Rv0911  | 2  | 2 | 0,902076825 conserved hypotheticals |
| Rv1225c | 2  | 2 | 0,902076825 conserved hypotheticals |
| Rv1290c | 2  | 2 | 0,902076825 conserved hypotheticals |
| Rv1508A | 2  | 2 | 0,902076825 conserved hypotheticals |
| Rv1805c | 2  | 2 | 0,902076825 conserved hypotheticals |
| Rv1825  | 2  | 2 | 0,902076825 conserved hypotheticals |
| Rv2125  | 2  | 2 | 0,902076825 conserved hypotheticals |
| Rv2325c | 2  | 2 | 0,902076825 conserved hypotheticals |
| Rv2413c | 2  | 2 | 0,902076825 conserved hypotheticals |
| Rv2414c | 2  | 2 | 0,902076825 conserved hypotheticals |
| Rv2522c | 2  | 2 | 0,902076825 conserved hypotheticals |
| Rv2532c | 2  | 2 | 0,902076825 conserved hypotheticals |
| Rv2689c | 2  | 2 | 0,902076825 conserved hypotheticals |
| Rv2695  | 2  | 2 | 0,902076825 conserved hypotheticals |
| Rv2826c | 2  | 2 | 0,902076825 conserved hypotheticals |
| Rv2862c | 2  | 2 | 0,902076825 conserved hypotheticals |
| Rv2880c | 2  | 2 | 0,902076825 conserved hypotheticals |
| Rv3439c | 2  | 2 | 0,902076825 conserved hypotheticals |
| Rv1419  | 19 | 8 | 0,922402053 conserved hypotheticals |
| Rv0979c | 9  | 0 | 0,932297131 conserved hypotheticals |
| Rv1532c | 9  | 0 | 0,932297131 conserved hypotheticals |
| Rv1961  | 9  | 0 | 0,932297131 conserved hypotheticals |
| Rv0836c | 10 | 0 | 0,942423529 conserved hypotheticals |
| Rv1597  | 10 | 0 | 0,942423529 conserved hypotheticals |
| Rv1794  | 20 | 8 | 0,950979338 conserved hypotheticals |
| Rv1724c | 7  | 0 | 0,965258939 conserved hypotheticals |
| Rv2390c | 7  | 0 | 0,965258939 conserved hypotheticals |
| Rv2734  | 7  | 0 | 0,965258939 conserved hypotheticals |
| Rv2808  | 7  | 0 | 0,965258939 conserved hypotheticals |
| Rv3079c | 7  | 0 | 0,965258939 conserved hypotheticals |
| Rv3438  | 7  | 0 | 0,965258939 conserved hypotheticals |

|         |    |    |                                     |
|---------|----|----|-------------------------------------|
| Rv1830  | 14 | 6  | 0,966007031 conserved hypotheticals |
| Rv1813c | 23 | 8  | 0,971879662 conserved hypotheticals |
| Rv2556c | 23 | 8  | 0,971879662 conserved hypotheticals |
| Rv0298  | 84 | 15 | 0,979761947 conserved hypotheticals |
| Rv1898  | 13 | 5  | 0,979843859 conserved hypotheticals |
| Rv2304c | 13 | 6  | 0,9805796 conserved hypotheticals   |
| Rv0330c | 8  | 0  | 0,980645136 conserved hypotheticals |
| Rv1374c | 8  | 0  | 0,980645136 conserved hypotheticals |
| Rv1718  | 8  | 0  | 0,980645136 conserved hypotheticals |
| Rv2705c | 8  | 0  | 0,980645136 conserved hypotheticals |
| Rv3222c | 55 | 18 | 0,980672255 conserved hypotheticals |
| Rv1914c | 8  | 4  | 1,000356578 conserved hypotheticals |
| Rv3678A | 8  | 4  | 1,000356578 conserved hypotheticals |
| Rv0611c | 44 | 15 | 1,011732408 conserved hypotheticals |
| Rv0695  | 3  | 2  | 1,017645149 conserved hypotheticals |
| Rv1186c | 3  | 2  | 1,017645149 conserved hypotheticals |
| Rv1443c | 3  | 2  | 1,017645149 conserved hypotheticals |
| Rv1924c | 3  | 2  | 1,017645149 conserved hypotheticals |
| Rv2042c | 3  | 2  | 1,017645149 conserved hypotheticals |
| Rv2426c | 3  | 2  | 1,017645149 conserved hypotheticals |
| Rv2929  | 3  | 2  | 1,017645149 conserved hypotheticals |
| Rv3165c | 3  | 2  | 1,017645149 conserved hypotheticals |
| Rv3181c | 3  | 2  | 1,017645149 conserved hypotheticals |
| Rv3195  | 3  | 2  | 1,017645149 conserved hypotheticals |
| Rv3626c | 3  | 2  | 1,017645149 conserved hypotheticals |
| Rv3627c | 3  | 2  | 1,017645149 conserved hypotheticals |
| Rv3785  | 3  | 2  | 1,017645149 conserved hypotheticals |
| Rv3856c | 3  | 2  | 1,017645149 conserved hypotheticals |
| Rv3906c | 3  | 2  | 1,017645149 conserved hypotheticals |
| Rv2239c | 14 | 5  | 1,020149025 conserved hypotheticals |
| Rv0057  | 6  | 3  | 1,023060102 conserved hypotheticals |
| Rv0299  | 6  | 3  | 1,023060102 conserved hypotheticals |
| Rv0345  | 6  | 3  | 1,023060102 conserved hypotheticals |
| Rv1769  | 6  | 3  | 1,023060102 conserved hypotheticals |

|         |     |    |                                     |
|---------|-----|----|-------------------------------------|
| Rv2288  | 6   | 3  | 1,023060102 conserved hypotheticals |
| Rv2411c | 6   | 3  | 1,023060102 conserved hypotheticals |
| Rv3424c | 6   | 3  | 1,023060102 conserved hypotheticals |
| Rv1331  | 122 | 34 | 1,02324987 conserved hypotheticals  |
| Rv2307A | 12  | 1  | 1,031469845 conserved hypotheticals |
| Rv3081  | 12  | 1  | 1,031469845 conserved hypotheticals |
| Rv2837c | 22  | 7  | 1,031469845 conserved hypotheticals |
| Rv0323c | 11  | 1  | 1,032354536 conserved hypotheticals |
| Rv0740  | 11  | 1  | 1,032354536 conserved hypotheticals |
| Rv0857  | 11  | 1  | 1,032354536 conserved hypotheticals |
| Rv1765c | 11  | 1  | 1,032354536 conserved hypotheticals |
| Rv1958c | 11  | 1  | 1,032354536 conserved hypotheticals |
| Rv1929c | 18  | 2  | 1,036154677 conserved hypotheticals |
| Rv2927c | 18  | 2  | 1,036154677 conserved hypotheticals |
| Rv0502  | 57  | 9  | 1,039743796 conserved hypotheticals |
| Rv2638  | 13  | 1  | 1,045711168 conserved hypotheticals |
| Rv2022c | 37  | 13 | 1,049822222 conserved hypotheticals |
| Rv1828  | 25  | 9  | 1,052021455 conserved hypotheticals |
| Rv2182c | 76  | 13 | 1,063159347 conserved hypotheticals |
| Rv0340  | 16  | 6  | 1,063564022 conserved hypotheticals |
| Rv2708c | 16  | 6  | 1,063564022 conserved hypotheticals |
| Rv3847  | 16  | 6  | 1,063564022 conserved hypotheticals |
| Rv1904  | 30  | 10 | 1,065552 conserved hypotheticals    |
| Rv0047c | 78  | 13 | 1,070016682 conserved hypotheticals |
| Rv2172c | 31  | 4  | 1,073428571 conserved hypotheticals |
| Rv0571c | 7   | 3  | 1,073553923 conserved hypotheticals |
| Rv1006  | 7   | 3  | 1,073553923 conserved hypotheticals |
| Rv1546  | 7   | 3  | 1,073553923 conserved hypotheticals |
| Rv2675c | 7   | 3  | 1,073553923 conserved hypotheticals |
| Rv3075c | 7   | 3  | 1,073553923 conserved hypotheticals |
| Rv3237c | 7   | 3  | 1,073553923 conserved hypotheticals |
| Rv3755c | 7   | 3  | 1,073553923 conserved hypotheticals |
| Rv1693  | 11  | 4  | 1,075323219 conserved hypotheticals |
| Rv2478c | 11  | 4  | 1,075323219 conserved hypotheticals |



|         |    |    |                                     |
|---------|----|----|-------------------------------------|
| Rv2554c | 11 | 4  | 1,075323219 conserved hypotheticals |
| Rv1775  | 21 | 2  | 1,077283107 conserved hypotheticals |
| Rv1287  | 27 | 10 | 1,079263701 conserved hypotheticals |
| Rv2406c | 31 | 10 | 1,081092449 conserved hypotheticals |
| Rv1462  | 26 | 8  | 1,081801222 conserved hypotheticals |
| Rv1117  | 63 | 10 | 1,087325998 conserved hypotheticals |
| Rv0207c | 9  | 4  | 1,090043564 conserved hypotheticals |
| Rv1159A | 9  | 4  | 1,090043564 conserved hypotheticals |
| Rv1770  | 9  | 4  | 1,090043564 conserved hypotheticals |
| Rv2475c | 9  | 4  | 1,090043564 conserved hypotheticals |
| Rv0692  | 39 | 13 | 1,090285405 conserved hypotheticals |
| Rv0464c | 5  | 0  | 1,093861497 conserved hypotheticals |
| Rv1890c | 5  | 0  | 1,093861497 conserved hypotheticals |
| Rv2570  | 5  | 0  | 1,093861497 conserved hypotheticals |
| Rv3403c | 5  | 0  | 1,093861497 conserved hypotheticals |
| Rv3404c | 5  | 0  | 1,093861497 conserved hypotheticals |
| Rv3521  | 5  | 0  | 1,093861497 conserved hypotheticals |
| Rv3572  | 5  | 0  | 1,093861497 conserved hypotheticals |
| Rv0333  | 17 | 5  | 1,099440179 conserved hypotheticals |
| Rv2466c | 55 | 10 | 1,104572386 conserved hypotheticals |
| Rv0060  | 12 | 4  | 1,106640649 conserved hypotheticals |
| Rv0580c | 12 | 4  | 1,106640649 conserved hypotheticals |
| Rv1874  | 12 | 4  | 1,106640649 conserved hypotheticals |
| Rv3699  | 12 | 4  | 1,106640649 conserved hypotheticals |
| Rv0470A | 6  | 0  | 1,107198572 conserved hypotheticals |
| Rv1116  | 6  | 0  | 1,107198572 conserved hypotheticals |
| Rv1503c | 6  | 0  | 1,107198572 conserved hypotheticals |
| Rv2008c | 6  | 0  | 1,107198572 conserved hypotheticals |
| Rv3768  | 6  | 0  | 1,107198572 conserved hypotheticals |
| Rv0460  | 32 | 5  | 1,107346728 conserved hypotheticals |
| Rv0543c | 19 | 6  | 1,108162472 conserved hypotheticals |
| Rv2901c | 19 | 6  | 1,108162472 conserved hypotheticals |
| Rv2842c | 47 | 9  | 1,112598414 conserved hypotheticals |
| Rv0690c | 10 | 4  | 1,115414979 conserved hypotheticals |

|         |    |    |                                     |
|---------|----|----|-------------------------------------|
| Rv0775  | 10 | 4  | 1,115414979 conserved hypotheticals |
| Rv2018  | 10 | 4  | 1,115414979 conserved hypotheticals |
| Rv0190  | 49 | 9  | 1,11632007 conserved hypotheticals  |
| Rv1906c | 24 | 4  | 1,12277095 conserved hypotheticals  |
| Rv3749c | 25 | 3  | 1,123338053 conserved hypotheticals |
| Rv0826  | 15 | 1  | 1,126699026 conserved hypotheticals |
| Rv0863  | 15 | 1  | 1,126699026 conserved hypotheticals |
| Rv2166c | 15 | 1  | 1,126699026 conserved hypotheticals |
| Rv3529c | 15 | 1  | 1,126699026 conserved hypotheticals |
| Rv0877  | 34 | 11 | 1,1297 conserved hypotheticals      |
| Rv0257  | 5  | 2  | 1,132270883 conserved hypotheticals |
| Rv0471c | 5  | 2  | 1,132270883 conserved hypotheticals |
| Rv0756c | 5  | 2  | 1,132270883 conserved hypotheticals |
| Rv0801  | 5  | 2  | 1,132270883 conserved hypotheticals |
| Rv1063c | 5  | 2  | 1,132270883 conserved hypotheticals |
| Rv1748  | 5  | 2  | 1,132270883 conserved hypotheticals |
| Rv2798c | 5  | 2  | 1,132270883 conserved hypotheticals |
| Rv3656c | 5  | 2  | 1,132270883 conserved hypotheticals |
| Rv3705c | 5  | 2  | 1,132270883 conserved hypotheticals |
| Rv3489  | 23 | 7  | 1,133138026 conserved hypotheticals |
| Rv1461  | 35 | 6  | 1,142666132 conserved hypotheticals |
| Rv1883c | 16 | 2  | 1,143221307 conserved hypotheticals |
| Rv2016  | 16 | 2  | 1,143221307 conserved hypotheticals |
| Rv0181c | 8  | 3  | 1,143564814 conserved hypotheticals |
| Rv0579  | 8  | 3  | 1,143564814 conserved hypotheticals |
| Rv2603c | 8  | 3  | 1,143564814 conserved hypotheticals |
| Rv3701c | 8  | 3  | 1,143564814 conserved hypotheticals |
| Rv0141c | 15 | 2  | 1,146799395 conserved hypotheticals |
| Rv2908c | 15 | 2  | 1,146799395 conserved hypotheticals |
| Rv3073c | 15 | 2  | 1,146799395 conserved hypotheticals |
| Rv1810  | 33 | 10 | 1,15159361 conserved hypotheticals  |
| Rv0185  | 6  | 2  | 1,154704835 conserved hypotheticals |
| Rv0424c | 6  | 2  | 1,154704835 conserved hypotheticals |
| Rv1545  | 6  | 2  | 1,154704835 conserved hypotheticals |

|         |   |   |                                     |
|---------|---|---|-------------------------------------|
| Rv1711  | 6 | 2 | 1,154704835 conserved hypotheticals |
| Rv1893  | 6 | 2 | 1,154704835 conserved hypotheticals |
| Rv1977  | 6 | 2 | 1,154704835 conserved hypotheticals |
| Rv2327  | 6 | 2 | 1,154704835 conserved hypotheticals |
| Rv2774c | 6 | 2 | 1,154704835 conserved hypotheticals |
| Rv3226c | 6 | 2 | 1,154704835 conserved hypotheticals |
| Rv3312c | 6 | 2 | 1,154704835 conserved hypotheticals |
| Rv3369  | 6 | 2 | 1,154704835 conserved hypotheticals |
| Rv3688c | 6 | 2 | 1,154704835 conserved hypotheticals |
| Rv0036c | 1 | 1 | 1,155519357 conserved hypotheticals |
| Rv0052  | 1 | 1 | 1,155519357 conserved hypotheticals |
| Rv0059  | 1 | 1 | 1,155519357 conserved hypotheticals |
| Rv0163  | 1 | 1 | 1,155519357 conserved hypotheticals |
| Rv0184  | 1 | 1 | 1,155519357 conserved hypotheticals |
| Rv0259c | 1 | 1 | 1,155519357 conserved hypotheticals |
| Rv0358  | 1 | 1 | 1,155519357 conserved hypotheticals |
| Rv0525  | 1 | 1 | 1,155519357 conserved hypotheticals |
| Rv0906  | 1 | 1 | 1,155519357 conserved hypotheticals |
| Rv0925c | 1 | 1 | 1,155519357 conserved hypotheticals |
| Rv1021  | 1 | 1 | 1,155519357 conserved hypotheticals |
| Rv1062  | 1 | 1 | 1,155519357 conserved hypotheticals |
| Rv1084  | 1 | 1 | 1,155519357 conserved hypotheticals |
| Rv1112  | 1 | 1 | 1,155519357 conserved hypotheticals |
| Rv1191  | 1 | 1 | 1,155519357 conserved hypotheticals |
| Rv1204c | 1 | 1 | 1,155519357 conserved hypotheticals |
| Rv1215c | 1 | 1 | 1,155519357 conserved hypotheticals |
| Rv1276c | 1 | 1 | 1,155519357 conserved hypotheticals |
| Rv1278  | 1 | 1 | 1,155519357 conserved hypotheticals |
| Rv1322  | 1 | 1 | 1,155519357 conserved hypotheticals |
| Rv1413  | 1 | 1 | 1,155519357 conserved hypotheticals |
| Rv1504c | 1 | 1 | 1,155519357 conserved hypotheticals |
| Rv1515c | 1 | 1 | 1,155519357 conserved hypotheticals |
| Rv1519  | 1 | 1 | 1,155519357 conserved hypotheticals |
| Rv1637c | 1 | 1 | 1,155519357 conserved hypotheticals |

|         |   |   |                                     |
|---------|---|---|-------------------------------------|
| Rv1680  | 1 | 1 | 1,155519357 conserved hypotheticals |
| Rv1752  | 1 | 1 | 1,155519357 conserved hypotheticals |
| Rv1947  | 1 | 1 | 1,155519357 conserved hypotheticals |
| Rv2003c | 1 | 1 | 1,155519357 conserved hypotheticals |
| Rv2067c | 1 | 1 | 1,155519357 conserved hypotheticals |
| Rv2083  | 1 | 1 | 1,155519357 conserved hypotheticals |
| Rv2135c | 1 | 1 | 1,155519357 conserved hypotheticals |
| Rv2257c | 1 | 1 | 1,155519357 conserved hypotheticals |
| Rv2275  | 1 | 1 | 1,155519357 conserved hypotheticals |
| Rv2293c | 1 | 1 | 1,155519357 conserved hypotheticals |
| Rv2315c | 1 | 1 | 1,155519357 conserved hypotheticals |
| Rv2323c | 1 | 1 | 1,155519357 conserved hypotheticals |
| Rv2375  | 1 | 1 | 1,155519357 conserved hypotheticals |
| Rv2415c | 1 | 1 | 1,155519357 conserved hypotheticals |
| Rv2481c | 1 | 1 | 1,155519357 conserved hypotheticals |
| Rv2541  | 1 | 1 | 1,155519357 conserved hypotheticals |
| Rv2567  | 1 | 1 | 1,155519357 conserved hypotheticals |
| Rv2733c | 1 | 1 | 1,155519357 conserved hypotheticals |
| Rv2787  | 1 | 1 | 1,155519357 conserved hypotheticals |
| Rv2802c | 1 | 1 | 1,155519357 conserved hypotheticals |
| Rv2816c | 1 | 1 | 1,155519357 conserved hypotheticals |
| Rv2897c | 1 | 1 | 1,155519357 conserved hypotheticals |
| Rv2955c | 1 | 1 | 1,155519357 conserved hypotheticals |
| Rv3026c | 1 | 1 | 1,155519357 conserved hypotheticals |
| Rv3074  | 1 | 1 | 1,155519357 conserved hypotheticals |
| Rv3228  | 1 | 1 | 1,155519357 conserved hypotheticals |
| Rv3304  | 1 | 1 | 1,155519357 conserved hypotheticals |
| Rv3365c | 1 | 1 | 1,155519357 conserved hypotheticals |
| Rv3422c | 1 | 1 | 1,155519357 conserved hypotheticals |
| Rv3555c | 1 | 1 | 1,155519357 conserved hypotheticals |
| Rv3594  | 1 | 1 | 1,155519357 conserved hypotheticals |
| Rv3611  | 1 | 1 | 1,155519357 conserved hypotheticals |
| Rv3662c | 1 | 1 | 1,155519357 conserved hypotheticals |
| Rv3691  | 1 | 1 | 1,155519357 conserved hypotheticals |

|         |    |    |                                     |
|---------|----|----|-------------------------------------|
| Rv3698  | 1  | 1  | 1,155519357 conserved hypotheticals |
| Rv3787c | 1  | 1  | 1,155519357 conserved hypotheticals |
| Rv3813c | 1  | 1  | 1,155519357 conserved hypotheticals |
| Rv3897c | 1  | 1  | 1,155519357 conserved hypotheticals |
| Rv1870c | 37 | 7  | 1,162033776 conserved hypotheticals |
| Rv2513  | 15 | 5  | 1,167008184 conserved hypotheticals |
| Rv2778c | 15 | 5  | 1,167008184 conserved hypotheticals |
| Rv0990c | 67 | 18 | 1,167536842 conserved hypotheticals |
| Rv0839  | 19 | 7  | 1,16839331 conserved hypotheticals  |
| Rv3780  | 19 | 7  | 1,16839331 conserved hypotheticals  |
| Rv1322A | 21 | 7  | 1,168514286 conserved hypotheticals |
| Rv0028  | 10 | 1  | 1,169814587 conserved hypotheticals |
| Rv1289  | 10 | 1  | 1,169814587 conserved hypotheticals |
| Rv2561  | 10 | 1  | 1,169814587 conserved hypotheticals |
| Rv3094c | 10 | 1  | 1,169814587 conserved hypotheticals |
| Rv0027  | 9  | 1  | 1,171820425 conserved hypotheticals |
| Rv0123  | 9  | 1  | 1,171820425 conserved hypotheticals |
| Rv0381c | 9  | 1  | 1,171820425 conserved hypotheticals |
| Rv0762c | 9  | 1  | 1,171820425 conserved hypotheticals |
| Rv0854  | 9  | 1  | 1,171820425 conserved hypotheticals |
| Rv1375  | 9  | 1  | 1,171820425 conserved hypotheticals |
| Rv2015c | 9  | 1  | 1,171820425 conserved hypotheticals |
| Rv2133c | 9  | 1  | 1,171820425 conserved hypotheticals |
| Rv2367c | 9  | 1  | 1,171820425 conserved hypotheticals |
| Rv2742c | 9  | 1  | 1,171820425 conserved hypotheticals |
| Rv3338  | 9  | 1  | 1,171820425 conserved hypotheticals |
| Rv3566A | 9  | 1  | 1,171820425 conserved hypotheticals |
| Rv1875  | 68 | 13 | 1,172078447 conserved hypotheticals |
| Rv0443  | 32 | 6  | 1,174939457 conserved hypotheticals |
| Rv0496  | 9  | 3  | 1,175481928 conserved hypotheticals |
| Rv0811c | 9  | 3  | 1,175481928 conserved hypotheticals |
| Rv0910  | 9  | 3  | 1,175481928 conserved hypotheticals |
| Rv1171  | 9  | 3  | 1,175481928 conserved hypotheticals |
| Rv3678c | 9  | 3  | 1,175481928 conserved hypotheticals |

|         |    |   |                                     |
|---------|----|---|-------------------------------------|
| Rv3719  | 9  | 3 | 1,175481928 conserved hypotheticals |
| Rv3412  | 40 | 8 | 1,177342641 conserved hypotheticals |
| Rv0164  | 2  | 1 | 1,177742083 conserved hypotheticals |
| Rv0264c | 2  | 1 | 1,177742083 conserved hypotheticals |
| Rv0312  | 2  | 1 | 1,177742083 conserved hypotheticals |
| Rv0433  | 2  | 1 | 1,177742083 conserved hypotheticals |
| Rv0552  | 2  | 1 | 1,177742083 conserved hypotheticals |
| Rv0566c | 2  | 1 | 1,177742083 conserved hypotheticals |
| Rv0607  | 2  | 1 | 1,177742083 conserved hypotheticals |
| Rv0647c | 2  | 1 | 1,177742083 conserved hypotheticals |
| Rv0679c | 2  | 1 | 1,177742083 conserved hypotheticals |
| Rv0698  | 2  | 1 | 1,177742083 conserved hypotheticals |
| Rv0739  | 2  | 1 | 1,177742083 conserved hypotheticals |
| Rv0776c | 2  | 1 | 1,177742083 conserved hypotheticals |
| Rv0959  | 2  | 1 | 1,177742083 conserved hypotheticals |
| Rv0964c | 2  | 1 | 1,177742083 conserved hypotheticals |
| Rv1003  | 2  | 1 | 1,177742083 conserved hypotheticals |
| Rv1154c | 2  | 1 | 1,177742083 conserved hypotheticals |
| Rv1277  | 2  | 1 | 1,177742083 conserved hypotheticals |
| Rv1341  | 2  | 1 | 1,177742083 conserved hypotheticals |
| Rv1356c | 2  | 1 | 1,177742083 conserved hypotheticals |
| Rv1366  | 2  | 1 | 1,177742083 conserved hypotheticals |
| Rv1376  | 2  | 1 | 1,177742083 conserved hypotheticals |
| Rv1378c | 2  | 1 | 1,177742083 conserved hypotheticals |
| Rv1505c | 2  | 1 | 1,177742083 conserved hypotheticals |
| Rv1728c | 2  | 1 | 1,177742083 conserved hypotheticals |
| Rv1836c | 2  | 1 | 1,177742083 conserved hypotheticals |
| Rv2033c | 2  | 1 | 1,177742083 conserved hypotheticals |
| Rv2049c | 2  | 1 | 1,177742083 conserved hypotheticals |
| Rv2237  | 2  | 1 | 1,177742083 conserved hypotheticals |
| Rv2417c | 2  | 1 | 1,177742083 conserved hypotheticals |
| Rv2469c | 2  | 1 | 1,177742083 conserved hypotheticals |
| Rv2562  | 2  | 1 | 1,177742083 conserved hypotheticals |
| Rv2712c | 2  | 1 | 1,177742083 conserved hypotheticals |

|         |   |   |                                     |
|---------|---|---|-------------------------------------|
| Rv2795c | 2 | 1 | 1,177742083 conserved hypotheticals |
| Rv2805  | 2 | 1 | 1,177742083 conserved hypotheticals |
| Rv2819c | 2 | 1 | 1,177742083 conserved hypotheticals |
| Rv2820c | 2 | 1 | 1,177742083 conserved hypotheticals |
| Rv2844  | 2 | 1 | 1,177742083 conserved hypotheticals |
| Rv2956  | 2 | 1 | 1,177742083 conserved hypotheticals |
| Rv2960c | 2 | 1 | 1,177742083 conserved hypotheticals |
| Rv2998  | 2 | 1 | 1,177742083 conserved hypotheticals |
| Rv3190c | 2 | 1 | 1,177742083 conserved hypotheticals |
| Rv3231c | 2 | 1 | 1,177742083 conserved hypotheticals |
| Rv3242c | 2 | 1 | 1,177742083 conserved hypotheticals |
| Rv3256c | 2 | 1 | 1,177742083 conserved hypotheticals |
| Rv3311  | 2 | 1 | 1,177742083 conserved hypotheticals |
| Rv3353c | 2 | 1 | 1,177742083 conserved hypotheticals |
| Rv3413c | 2 | 1 | 1,177742083 conserved hypotheticals |
| Rv3415c | 2 | 1 | 1,177742083 conserved hypotheticals |
| Rv3541c | 2 | 1 | 1,177742083 conserved hypotheticals |
| Rv3745c | 2 | 1 | 1,177742083 conserved hypotheticals |
| Rv3770c | 2 | 1 | 1,177742083 conserved hypotheticals |
| Rv3836  | 2 | 1 | 1,177742083 conserved hypotheticals |
| Rv3860  | 2 | 1 | 1,177742083 conserved hypotheticals |
| Rv0508  | 7 | 2 | 1,179167167 conserved hypotheticals |
| Rv0831c | 7 | 2 | 1,179167167 conserved hypotheticals |
| Rv0998  | 7 | 2 | 1,179167167 conserved hypotheticals |
| Rv1192  | 7 | 2 | 1,179167167 conserved hypotheticals |
| Rv1429  | 7 | 2 | 1,179167167 conserved hypotheticals |
| Rv2314c | 7 | 2 | 1,179167167 conserved hypotheticals |
| Rv2923c | 7 | 2 | 1,179167167 conserved hypotheticals |
| Rv3038c | 7 | 2 | 1,179167167 conserved hypotheticals |
| Rv3519  | 7 | 2 | 1,179167167 conserved hypotheticals |
| Rv3672c | 7 | 2 | 1,179167167 conserved hypotheticals |
| Rv3716c | 7 | 2 | 1,179167167 conserved hypotheticals |
| Rv0074  | 3 | 1 | 1,180692338 conserved hypotheticals |
| Rv0121c | 3 | 1 | 1,180692338 conserved hypotheticals |

|         |   |   |                                     |
|---------|---|---|-------------------------------------|
| Rv0210  | 3 | 1 | 1,180692338 conserved hypotheticals |
| Rv0307c | 3 | 1 | 1,180692338 conserved hypotheticals |
| Rv0365c | 3 | 1 | 1,180692338 conserved hypotheticals |
| Rv0434  | 3 | 1 | 1,180692338 conserved hypotheticals |
| Rv0492A | 3 | 1 | 1,180692338 conserved hypotheticals |
| Rv0493c | 3 | 1 | 1,180692338 conserved hypotheticals |
| Rv0786c | 3 | 1 | 1,180692338 conserved hypotheticals |
| Rv0883c | 3 | 1 | 1,180692338 conserved hypotheticals |
| Rv1111c | 3 | 1 | 1,180692338 conserved hypotheticals |
| Rv1126c | 3 | 1 | 1,180692338 conserved hypotheticals |
| Rv1480  | 3 | 1 | 1,180692338 conserved hypotheticals |
| Rv1507c | 3 | 1 | 1,180692338 conserved hypotheticals |
| Rv1525  | 3 | 1 | 1,180692338 conserved hypotheticals |
| Rv1632c | 3 | 1 | 1,180692338 conserved hypotheticals |
| Rv1815  | 3 | 1 | 1,180692338 conserved hypotheticals |
| Rv1823  | 3 | 1 | 1,180692338 conserved hypotheticals |
| Rv1868  | 3 | 1 | 1,180692338 conserved hypotheticals |
| Rv1896c | 3 | 1 | 1,180692338 conserved hypotheticals |
| Rv1897c | 3 | 1 | 1,180692338 conserved hypotheticals |
| Rv1927  | 3 | 1 | 1,180692338 conserved hypotheticals |
| Rv1978  | 3 | 1 | 1,180692338 conserved hypotheticals |
| Rv2047c | 3 | 1 | 1,180692338 conserved hypotheticals |
| Rv2140c | 3 | 1 | 1,180692338 conserved hypotheticals |
| Rv2148c | 3 | 1 | 1,180692338 conserved hypotheticals |
| Rv2205c | 3 | 1 | 1,180692338 conserved hypotheticals |
| Rv2229c | 3 | 1 | 1,180692338 conserved hypotheticals |
| Rv2264c | 3 | 1 | 1,180692338 conserved hypotheticals |
| Rv2307c | 3 | 1 | 1,180692338 conserved hypotheticals |
| Rv2410c | 3 | 1 | 1,180692338 conserved hypotheticals |
| Rv2418c | 3 | 1 | 1,180692338 conserved hypotheticals |
| Rv2425c | 3 | 1 | 1,180692338 conserved hypotheticals |
| Rv2468c | 3 | 1 | 1,180692338 conserved hypotheticals |
| Rv2683  | 3 | 1 | 1,180692338 conserved hypotheticals |
| Rv2751  | 3 | 1 | 1,180692338 conserved hypotheticals |



|         |   |   |                                     |
|---------|---|---|-------------------------------------|
| Rv3067  | 3 | 1 | 1,180692338 conserved hypotheticals |
| Rv3091  | 3 | 1 | 1,180692338 conserved hypotheticals |
| Rv3166c | 3 | 1 | 1,180692338 conserved hypotheticals |
| Rv3210c | 3 | 1 | 1,180692338 conserved hypotheticals |
| Rv3224A | 3 | 1 | 1,180692338 conserved hypotheticals |
| Rv3362c | 3 | 1 | 1,180692338 conserved hypotheticals |
| Rv3363c | 3 | 1 | 1,180692338 conserved hypotheticals |
| Rv3484  | 3 | 1 | 1,180692338 conserved hypotheticals |
| Rv3647c | 3 | 1 | 1,180692338 conserved hypotheticals |
| Rv3707c | 3 | 1 | 1,180692338 conserved hypotheticals |
| Rv3730c | 3 | 1 | 1,180692338 conserved hypotheticals |
| Rv3732  | 3 | 1 | 1,180692338 conserved hypotheticals |
| Rv3747  | 3 | 1 | 1,180692338 conserved hypotheticals |
| Rv3771c | 3 | 1 | 1,180692338 conserved hypotheticals |
| Rv3773c | 3 | 1 | 1,180692338 conserved hypotheticals |
| Rv3909  | 3 | 1 | 1,180692338 conserved hypotheticals |
| Rv0192  | 4 | 2 | 1,186675548 conserved hypotheticals |
| Rv0376c | 4 | 2 | 1,186675548 conserved hypotheticals |
| Rv0466  | 4 | 2 | 1,186675548 conserved hypotheticals |
| Rv0487  | 4 | 2 | 1,186675548 conserved hypotheticals |
| Rv1083  | 4 | 2 | 1,186675548 conserved hypotheticals |
| Rv1100  | 4 | 2 | 1,186675548 conserved hypotheticals |
| Rv1205  | 4 | 2 | 1,186675548 conserved hypotheticals |
| Rv1261c | 4 | 2 | 1,186675548 conserved hypotheticals |
| Rv1288  | 4 | 2 | 1,186675548 conserved hypotheticals |
| Rv1314c | 4 | 2 | 1,186675548 conserved hypotheticals |
| Rv1531  | 4 | 2 | 1,186675548 conserved hypotheticals |
| Rv2132  | 4 | 2 | 1,186675548 conserved hypotheticals |
| Rv2248  | 4 | 2 | 1,186675548 conserved hypotheticals |
| Rv2331A | 4 | 2 | 1,186675548 conserved hypotheticals |
| Rv2409c | 4 | 2 | 1,186675548 conserved hypotheticals |
| Rv2828c | 4 | 2 | 1,186675548 conserved hypotheticals |
| Rv2915c | 4 | 2 | 1,186675548 conserved hypotheticals |
| Rv2991  | 4 | 2 | 1,186675548 conserved hypotheticals |

|         |    |    |                                     |
|---------|----|----|-------------------------------------|
| Rv3005c | 4  | 2  | 1,186675548 conserved hypotheticals |
| Rv3651  | 4  | 2  | 1,186675548 conserved hypotheticals |
| Rv3822  | 4  | 2  | 1,186675548 conserved hypotheticals |
| Rv0997  | 10 | 3  | 1,188374024 conserved hypotheticals |
| Rv1352  | 10 | 3  | 1,188374024 conserved hypotheticals |
| Rv3142c | 10 | 3  | 1,188374024 conserved hypotheticals |
| Rv3284  | 10 | 3  | 1,188374024 conserved hypotheticals |
| Rv3916c | 42 | 11 | 1,18944903 conserved hypotheticals  |
| Rv1265  | 45 | 12 | 1,199399446 conserved hypotheticals |
| Rv0367c | 11 | 3  | 1,205922974 conserved hypotheticals |
| Rv3722c | 11 | 3  | 1,205922974 conserved hypotheticals |
| Rv1976c | 14 | 2  | 1,213683268 conserved hypotheticals |
| Rv3769  | 14 | 2  | 1,213683268 conserved hypotheticals |
| Rv1645c | 13 | 2  | 1,215391325 conserved hypotheticals |
| Rv2019  | 13 | 2  | 1,215391325 conserved hypotheticals |
| Rv2405  | 13 | 2  | 1,215391325 conserved hypotheticals |
| Rv3491  | 13 | 4  | 1,218883666 conserved hypotheticals |
| Rv2184c | 14 | 4  | 1,228707776 conserved hypotheticals |
| Rv3733c | 14 | 4  | 1,228707776 conserved hypotheticals |
| Rv0274  | 18 | 3  | 1,25141408 conserved hypotheticals  |
| Rv2714  | 18 | 3  | 1,25141408 conserved hypotheticals  |
| Rv1891  | 17 | 3  | 1,251923802 conserved hypotheticals |
| Rv2827c | 17 | 3  | 1,251923802 conserved hypotheticals |
| Rv0030  | 19 | 3  | 1,254088199 conserved hypotheticals |
| Rv0789c | 19 | 3  | 1,254088199 conserved hypotheticals |
| Rv2558  | 73 | 19 | 1,25944725 conserved hypotheticals  |
| Rv2372c | 19 | 5  | 1,267811055 conserved hypotheticals |
| Rv0078A | 23 | 4  | 1,278009252 conserved hypotheticals |
| Rv0268c | 23 | 4  | 1,278009252 conserved hypotheticals |
| Rv1489A | 23 | 4  | 1,278009252 conserved hypotheticals |
| Rv1301  | 23 | 6  | 1,287994617 conserved hypotheticals |
| Rv2910c | 25 | 5  | 1,296340815 conserved hypotheticals |
| Rv3337  | 25 | 5  | 1,296340815 conserved hypotheticals |
| Rv0500A | 26 | 7  | 1,300315152 conserved hypotheticals |

|         |    |   |                                     |
|---------|----|---|-------------------------------------|
| Rv2990c | 28 | 7 | 1,312544576 conserved hypotheticals |
| Rv2134c | 42 | 9 | 1,350399083 conserved hypotheticals |
| Rv0349  | 8  | 1 | 1,56554878 conserved hypotheticals  |
| Rv0430  | 8  | 1 | 1,56554878 conserved hypotheticals  |
| Rv0504c | 8  | 1 | 1,56554878 conserved hypotheticals  |
| Rv1060  | 8  | 1 | 1,56554878 conserved hypotheticals  |
| Rv2307B | 8  | 1 | 1,56554878 conserved hypotheticals  |
| Rv2619c | 8  | 1 | 1,56554878 conserved hypotheticals  |
| Rv2722  | 8  | 1 | 1,56554878 conserved hypotheticals  |
| Rv2749  | 8  | 1 | 1,56554878 conserved hypotheticals  |
| Rv3072c | 8  | 1 | 1,56554878 conserved hypotheticals  |
| Rv0941c | 7  | 1 | 1,56554878 conserved hypotheticals  |
| Rv1043c | 7  | 1 | 1,56554878 conserved hypotheticals  |
| Rv1444c | 7  | 1 | 1,56554878 conserved hypotheticals  |
| Rv1540  | 7  | 1 | 1,56554878 conserved hypotheticals  |
| Rv1716  | 7  | 1 | 1,56554878 conserved hypotheticals  |
| Rv1879  | 7  | 1 | 1,56554878 conserved hypotheticals  |
| Rv1951c | 7  | 1 | 1,56554878 conserved hypotheticals  |
| Rv2114  | 7  | 1 | 1,56554878 conserved hypotheticals  |
| Rv2216  | 7  | 1 | 1,56554878 conserved hypotheticals  |
| Rv2525c | 7  | 1 | 1,56554878 conserved hypotheticals  |
| Rv2809  | 7  | 1 | 1,56554878 conserved hypotheticals  |
| Rv3243c | 7  | 1 | 1,56554878 conserved hypotheticals  |
| Rv3254  | 7  | 1 | 1,56554878 conserved hypotheticals  |
| Rv3258c | 7  | 1 | 1,56554878 conserved hypotheticals  |
| Rv3268  | 7  | 1 | 1,56554878 conserved hypotheticals  |
| Rv3898c | 7  | 1 | 1,56554878 conserved hypotheticals  |
| Rv0263c | 6  | 1 | 1,56554878 conserved hypotheticals  |
| Rv0712  | 6  | 1 | 1,56554878 conserved hypotheticals  |
| Rv0749A | 6  | 1 | 1,56554878 conserved hypotheticals  |
| Rv0822c | 6  | 1 | 1,56554878 conserved hypotheticals  |
| Rv0918  | 6  | 1 | 1,56554878 conserved hypotheticals  |
| Rv1061  | 6  | 1 | 1,56554878 conserved hypotheticals  |
| Rv1592c | 12 | 2 | 1,56554878 conserved hypotheticals  |

|         |    |   |                                    |
|---------|----|---|------------------------------------|
| Rv1669  | 6  | 1 | 1,56554878 conserved hypotheticals |
| Rv2052c | 6  | 1 | 1,56554878 conserved hypotheticals |
| Rv2149c | 6  | 1 | 1,56554878 conserved hypotheticals |
| Rv2242  | 6  | 1 | 1,56554878 conserved hypotheticals |
| Rv2298  | 12 | 2 | 1,56554878 conserved hypotheticals |
| Rv2342  | 6  | 1 | 1,56554878 conserved hypotheticals |
| Rv2717c | 12 | 2 | 1,56554878 conserved hypotheticals |
| Rv2728c | 6  | 1 | 1,56554878 conserved hypotheticals |
| Rv3120  | 6  | 1 | 1,56554878 conserved hypotheticals |
| Rv3123  | 6  | 1 | 1,56554878 conserved hypotheticals |
| Rv3360  | 6  | 1 | 1,56554878 conserved hypotheticals |
| Rv3528c | 6  | 1 | 1,56554878 conserved hypotheticals |
| Rv3900c | 6  | 1 | 1,56554878 conserved hypotheticals |
| Rv0142  | 11 | 2 | 1,56554878 conserved hypotheticals |
| Rv3902c | 11 | 2 | 1,56554878 conserved hypotheticals |
| Rv0049  | 16 | 3 | 1,56554878 conserved hypotheticals |
| Rv0025  | 5  | 1 | 1,56554878 conserved hypotheticals |
| Rv0061  | 5  | 1 | 1,56554878 conserved hypotheticals |
| Rv0258c | 5  | 1 | 1,56554878 conserved hypotheticals |
| Rv0269c | 5  | 1 | 1,56554878 conserved hypotheticals |
| Rv0421c | 5  | 1 | 1,56554878 conserved hypotheticals |
| Rv0574c | 5  | 1 | 1,56554878 conserved hypotheticals |
| Rv0610c | 5  | 1 | 1,56554878 conserved hypotheticals |
| Rv0898c | 20 | 4 | 1,56554878 conserved hypotheticals |
| Rv0950c | 5  | 1 | 1,56554878 conserved hypotheticals |
| Rv1109c | 5  | 1 | 1,56554878 conserved hypotheticals |
| Rv1203c | 5  | 1 | 1,56554878 conserved hypotheticals |
| Rv1339  | 5  | 1 | 1,56554878 conserved hypotheticals |
| Rv1439c | 5  | 1 | 1,56554878 conserved hypotheticals |
| Rv1498A | 5  | 1 | 1,56554878 conserved hypotheticals |
| Rv1501  | 5  | 1 | 1,56554878 conserved hypotheticals |
| Rv2186c | 5  | 1 | 1,56554878 conserved hypotheticals |
| Rv2286c | 5  | 1 | 1,56554878 conserved hypotheticals |
| Rv2420c | 5  | 1 | 1,56554878 conserved hypotheticals |

|         |    |    |                                    |
|---------|----|----|------------------------------------|
| Rv2730  | 5  | 1  | 1,56554878 conserved hypotheticals |
| Rv2731  | 15 | 3  | 1,56554878 conserved hypotheticals |
| Rv2954c | 5  | 1  | 1,56554878 conserved hypotheticals |
| Rv2975c | 5  | 1  | 1,56554878 conserved hypotheticals |
| Rv3046c | 20 | 4  | 1,56554878 conserved hypotheticals |
| Rv3169  | 5  | 1  | 1,56554878 conserved hypotheticals |
| Rv3180c | 5  | 1  | 1,56554878 conserved hypotheticals |
| Rv3472  | 10 | 2  | 1,56554878 conserved hypotheticals |
| Rv3600c | 5  | 1  | 1,56554878 conserved hypotheticals |
| Rv3705A | 5  | 1  | 1,56554878 conserved hypotheticals |
| Rv3788  | 5  | 1  | 1,56554878 conserved hypotheticals |
| Rv3896c | 5  | 1  | 1,56554878 conserved hypotheticals |
| Rv2704  | 19 | 4  | 1,56554878 conserved hypotheticals |
| Rv0201c | 14 | 3  | 1,56554878 conserved hypotheticals |
| Rv0272c | 14 | 3  | 1,56554878 conserved hypotheticals |
| Rv2297  | 32 | 7  | 1,56554878 conserved hypotheticals |
| Rv0856  | 9  | 2  | 1,56554878 conserved hypotheticals |
| Rv2059  | 9  | 2  | 1,56554878 conserved hypotheticals |
| Rv2926c | 40 | 9  | 1,56554878 conserved hypotheticals |
| Rv1628c | 53 | 12 | 1,56554878 conserved hypotheticals |
| Rv0038  | 13 | 3  | 1,56554878 conserved hypotheticals |
| Rv0530  | 13 | 3  | 1,56554878 conserved hypotheticals |
| Rv0577  | 13 | 3  | 1,56554878 conserved hypotheticals |
| Rv0612  | 13 | 3  | 1,56554878 conserved hypotheticals |
| Rv2970A | 13 | 3  | 1,56554878 conserved hypotheticals |
| Rv0500B | 46 | 11 | 1,56554878 conserved hypotheticals |
| Rv1156  | 33 | 8  | 1,56554878 conserved hypotheticals |
| Rv0372c | 4  | 1  | 1,56554878 conserved hypotheticals |
| Rv0495c | 4  | 1  | 1,56554878 conserved hypotheticals |
| Rv0546c | 4  | 1  | 1,56554878 conserved hypotheticals |
| Rv0674  | 4  | 1  | 1,56554878 conserved hypotheticals |
| Rv0807  | 4  | 1  | 1,56554878 conserved hypotheticals |
| Rv0909  | 12 | 3  | 1,56554878 conserved hypotheticals |
| Rv0966c | 4  | 1  | 1,56554878 conserved hypotheticals |

|         |    |   |                                    |
|---------|----|---|------------------------------------|
| Rv1052  | 12 | 3 | 1,56554878 conserved hypotheticals |
| Rv1056  | 4  | 1 | 1,56554878 conserved hypotheticals |
| Rv1351  | 4  | 1 | 1,56554878 conserved hypotheticals |
| Rv1372  | 4  | 1 | 1,56554878 conserved hypotheticals |
| Rv1455  | 4  | 1 | 1,56554878 conserved hypotheticals |
| Rv1489  | 20 | 5 | 1,56554878 conserved hypotheticals |
| Rv1670  | 4  | 1 | 1,56554878 conserved hypotheticals |
| Rv1673c | 4  | 1 | 1,56554878 conserved hypotheticals |
| Rv1725c | 4  | 1 | 1,56554878 conserved hypotheticals |
| Rv1949c | 4  | 1 | 1,56554878 conserved hypotheticals |
| Rv1993c | 16 | 4 | 1,56554878 conserved hypotheticals |
| Rv2024c | 4  | 1 | 1,56554878 conserved hypotheticals |
| Rv2226  | 4  | 1 | 1,56554878 conserved hypotheticals |
| Rv2337c | 4  | 1 | 1,56554878 conserved hypotheticals |
| Rv2402  | 4  | 1 | 1,56554878 conserved hypotheticals |
| Rv2574  | 8  | 2 | 1,56554878 conserved hypotheticals |
| Rv2636  | 4  | 1 | 1,56554878 conserved hypotheticals |
| Rv2681  | 4  | 1 | 1,56554878 conserved hypotheticals |
| Rv2716  | 4  | 1 | 1,56554878 conserved hypotheticals |
| Rv2771c | 4  | 1 | 1,56554878 conserved hypotheticals |
| Rv2824c | 4  | 1 | 1,56554878 conserved hypotheticals |
| Rv3037c | 4  | 1 | 1,56554878 conserved hypotheticals |
| Rv3099c | 4  | 1 | 1,56554878 conserved hypotheticals |
| Rv3179  | 4  | 1 | 1,56554878 conserved hypotheticals |
| Rv3212  | 4  | 1 | 1,56554878 conserved hypotheticals |
| Rv3272  | 4  | 1 | 1,56554878 conserved hypotheticals |
| Rv3282  | 4  | 1 | 1,56554878 conserved hypotheticals |
| Rv3735  | 20 | 5 | 1,56554878 conserved hypotheticals |
| Rv3753c | 12 | 3 | 1,56554878 conserved hypotheticals |
| Rv3811  | 4  | 1 | 1,56554878 conserved hypotheticals |
| Rv0021c | 4  | 0 | 1,56554878 conserved hypotheticals |
| Rv0026  | 3  | 0 | 1,56554878 conserved hypotheticals |
| Rv0034  | 1  | 0 | 1,56554878 conserved hypotheticals |
| Rv0104  | 1  | 0 | 1,56554878 conserved hypotheticals |

|         |   |   |                                    |
|---------|---|---|------------------------------------|
| Rv0150c | 0 | 0 | 1,56554878 conserved hypotheticals |
| Rv0193c | 0 | 0 | 1,56554878 conserved hypotheticals |
| Rv0295c | 1 | 0 | 1,56554878 conserved hypotheticals |
| Rv0329c | 1 | 0 | 1,56554878 conserved hypotheticals |
| Rv0356c | 1 | 0 | 1,56554878 conserved hypotheticals |
| Rv0366c | 2 | 0 | 1,56554878 conserved hypotheticals |
| Rv0368c | 0 | 0 | 1,56554878 conserved hypotheticals |
| Rv0371c | 1 | 0 | 1,56554878 conserved hypotheticals |
| Rv0378  | 0 | 0 | 1,56554878 conserved hypotheticals |
| Rv0387c | 1 | 0 | 1,56554878 conserved hypotheticals |
| Rv0395  | 1 | 0 | 1,56554878 conserved hypotheticals |
| Rv0396  | 3 | 0 | 1,56554878 conserved hypotheticals |
| Rv0406c | 1 | 0 | 1,56554878 conserved hypotheticals |
| Rv0441c | 1 | 0 | 1,56554878 conserved hypotheticals |
| Rv0448c | 1 | 0 | 1,56554878 conserved hypotheticals |
| Rv0454  | 0 | 0 | 1,56554878 conserved hypotheticals |
| Rv0481c | 2 | 0 | 1,56554878 conserved hypotheticals |
| Rv0498  | 1 | 0 | 1,56554878 conserved hypotheticals |
| Rv0499  | 2 | 0 | 1,56554878 conserved hypotheticals |
| Rv0523c | 0 | 0 | 1,56554878 conserved hypotheticals |
| Rv0540  | 1 | 0 | 1,56554878 conserved hypotheticals |
| Rv0614  | 0 | 0 | 1,56554878 conserved hypotheticals |
| Rv0616c | 0 | 0 | 1,56554878 conserved hypotheticals |
| Rv0689c | 0 | 0 | 1,56554878 conserved hypotheticals |
| Rv0699  | 0 | 0 | 1,56554878 conserved hypotheticals |
| Rv0724A | 0 | 0 | 1,56554878 conserved hypotheticals |
| Rv0725c | 2 | 0 | 1,56554878 conserved hypotheticals |
| Rv0745  | 0 | 0 | 1,56554878 conserved hypotheticals |
| Rv0799c | 0 | 0 | 1,56554878 conserved hypotheticals |
| Rv0804  | 0 | 0 | 1,56554878 conserved hypotheticals |
| Rv0825c | 4 | 0 | 1,56554878 conserved hypotheticals |
| Rv0862c | 1 | 0 | 1,56554878 conserved hypotheticals |
| Rv0887c | 1 | 0 | 1,56554878 conserved hypotheticals |
| Rv0923c | 1 | 0 | 1,56554878 conserved hypotheticals |

|         |   |   |                                    |
|---------|---|---|------------------------------------|
| Rv0942  | 0 | 0 | 1,56554878 conserved hypotheticals |
| Rv0963c | 2 | 0 | 1,56554878 conserved hypotheticals |
| Rv0965c | 4 | 0 | 1,56554878 conserved hypotheticals |
| Rv0976c | 1 | 0 | 1,56554878 conserved hypotheticals |
| Rv0992c | 3 | 0 | 1,56554878 conserved hypotheticals |
| Rv0999  | 1 | 0 | 1,56554878 conserved hypotheticals |
| Rv1000c | 1 | 0 | 1,56554878 conserved hypotheticals |
| Rv1012  | 1 | 0 | 1,56554878 conserved hypotheticals |
| Rv1025  | 1 | 0 | 1,56554878 conserved hypotheticals |
| Rv1044  | 1 | 0 | 1,56554878 conserved hypotheticals |
| Rv1045  | 1 | 0 | 1,56554878 conserved hypotheticals |
| Rv1051c | 0 | 0 | 1,56554878 conserved hypotheticals |
| Rv1053c | 0 | 0 | 1,56554878 conserved hypotheticals |
| Rv1069c | 2 | 0 | 1,56554878 conserved hypotheticals |
| Rv1116A | 1 | 0 | 1,56554878 conserved hypotheticals |
| Rv1118c | 1 | 0 | 1,56554878 conserved hypotheticals |
| Rv1119c | 2 | 0 | 1,56554878 conserved hypotheticals |
| Rv1120c | 0 | 0 | 1,56554878 conserved hypotheticals |
| Rv1125  | 0 | 0 | 1,56554878 conserved hypotheticals |
| Rv1134  | 2 | 0 | 1,56554878 conserved hypotheticals |
| Rv1137c | 0 | 0 | 1,56554878 conserved hypotheticals |
| Rv1157c | 0 | 0 | 1,56554878 conserved hypotheticals |
| Rv1158c | 1 | 0 | 1,56554878 conserved hypotheticals |
| Rv1176c | 0 | 0 | 1,56554878 conserved hypotheticals |
| Rv1190  | 1 | 0 | 1,56554878 conserved hypotheticals |
| Rv1251c | 1 | 0 | 1,56554878 conserved hypotheticals |
| Rv1262c | 2 | 0 | 1,56554878 conserved hypotheticals |
| Rv1268c | 0 | 0 | 1,56554878 conserved hypotheticals |
| Rv1354c | 0 | 0 | 1,56554878 conserved hypotheticals |
| Rv1357c | 0 | 0 | 1,56554878 conserved hypotheticals |
| Rv1367c | 0 | 0 | 1,56554878 conserved hypotheticals |
| Rv1414  | 0 | 0 | 1,56554878 conserved hypotheticals |
| Rv1428c | 1 | 0 | 1,56554878 conserved hypotheticals |
| Rv1434  | 1 | 0 | 1,56554878 conserved hypotheticals |



|         |   |   |                                    |
|---------|---|---|------------------------------------|
| Rv1482c | 1 | 0 | 1,56554878 conserved hypotheticals |
| Rv1499  | 0 | 0 | 1,56554878 conserved hypotheticals |
| Rv1514c | 1 | 0 | 1,56554878 conserved hypotheticals |
| Rv1518  | 1 | 0 | 1,56554878 conserved hypotheticals |
| Rv1571  | 0 | 0 | 1,56554878 conserved hypotheticals |
| Rv1638A | 3 | 0 | 1,56554878 conserved hypotheticals |
| Rv1682  | 3 | 0 | 1,56554878 conserved hypotheticals |
| Rv1685c | 0 | 0 | 1,56554878 conserved hypotheticals |
| Rv1697  | 1 | 0 | 1,56554878 conserved hypotheticals |
| Rv1706A | 0 | 0 | 1,56554878 conserved hypotheticals |
| Rv1717  | 1 | 0 | 1,56554878 conserved hypotheticals |
| Rv1727  | 0 | 0 | 1,56554878 conserved hypotheticals |
| Rv1754c | 0 | 0 | 1,56554878 conserved hypotheticals |
| Rv1762c | 1 | 0 | 1,56554878 conserved hypotheticals |
| Rv1780  | 1 | 0 | 1,56554878 conserved hypotheticals |
| Rv1835c | 2 | 0 | 1,56554878 conserved hypotheticals |
| Rv1864c | 3 | 0 | 1,56554878 conserved hypotheticals |
| Rv1873  | 1 | 0 | 1,56554878 conserved hypotheticals |
| Rv1888A | 2 | 0 | 1,56554878 conserved hypotheticals |
| Rv1889c | 0 | 0 | 1,56554878 conserved hypotheticals |
| Rv1913  | 1 | 0 | 1,56554878 conserved hypotheticals |
| Rv1930c | 0 | 0 | 1,56554878 conserved hypotheticals |
| Rv1944c | 1 | 0 | 1,56554878 conserved hypotheticals |
| Rv1948c | 1 | 0 | 1,56554878 conserved hypotheticals |
| Rv1954c | 2 | 0 | 1,56554878 conserved hypotheticals |
| Rv1975  | 0 | 0 | 1,56554878 conserved hypotheticals |
| Rv1995  | 3 | 0 | 1,56554878 conserved hypotheticals |
| Rv1998c | 1 | 0 | 1,56554878 conserved hypotheticals |
| Rv2000  | 1 | 0 | 1,56554878 conserved hypotheticals |
| Rv2001  | 1 | 0 | 1,56554878 conserved hypotheticals |
| Rv2023c | 1 | 0 | 1,56554878 conserved hypotheticals |
| Rv2054  | 1 | 0 | 1,56554878 conserved hypotheticals |
| Rv2061c | 0 | 0 | 1,56554878 conserved hypotheticals |
| Rv2077A | 0 | 0 | 1,56554878 conserved hypotheticals |

|         |   |   |                                    |
|---------|---|---|------------------------------------|
| Rv2078  | 0 | 0 | 1,56554878 conserved hypotheticals |
| Rv2082  | 4 | 0 | 1,56554878 conserved hypotheticals |
| Rv2102  | 0 | 0 | 1,56554878 conserved hypotheticals |
| Rv2117  | 1 | 0 | 1,56554878 conserved hypotheticals |
| Rv2119  | 0 | 0 | 1,56554878 conserved hypotheticals |
| Rv2147c | 2 | 0 | 1,56554878 conserved hypotheticals |
| Rv2179c | 1 | 0 | 1,56554878 conserved hypotheticals |
| Rv2189c | 2 | 0 | 1,56554878 conserved hypotheticals |
| Rv2227  | 1 | 0 | 1,56554878 conserved hypotheticals |
| Rv2240c | 0 | 0 | 1,56554878 conserved hypotheticals |
| Rv2267c | 0 | 0 | 1,56554878 conserved hypotheticals |
| Rv2269c | 0 | 0 | 1,56554878 conserved hypotheticals |
| Rv2271  | 0 | 0 | 1,56554878 conserved hypotheticals |
| Rv2283  | 0 | 0 | 1,56554878 conserved hypotheticals |
| Rv2300c | 1 | 0 | 1,56554878 conserved hypotheticals |
| Rv2305  | 2 | 0 | 1,56554878 conserved hypotheticals |
| Rv2308  | 2 | 0 | 1,56554878 conserved hypotheticals |
| Rv2309A | 1 | 0 | 1,56554878 conserved hypotheticals |
| Rv2311  | 0 | 0 | 1,56554878 conserved hypotheticals |
| Rv2312  | 4 | 0 | 1,56554878 conserved hypotheticals |
| Rv2336  | 2 | 0 | 1,56554878 conserved hypotheticals |
| Rv2360c | 4 | 0 | 1,56554878 conserved hypotheticals |
| Rv2365c | 0 | 0 | 1,56554878 conserved hypotheticals |
| Rv2370c | 3 | 0 | 1,56554878 conserved hypotheticals |
| Rv2387  | 3 | 0 | 1,56554878 conserved hypotheticals |
| Rv2401  | 0 | 0 | 1,56554878 conserved hypotheticals |
| Rv2407  | 1 | 0 | 1,56554878 conserved hypotheticals |
| Rv2422  | 0 | 0 | 1,56554878 conserved hypotheticals |
| Rv2423  | 1 | 0 | 1,56554878 conserved hypotheticals |
| Rv2438A | 0 | 0 | 1,56554878 conserved hypotheticals |
| Rv2474c | 1 | 0 | 1,56554878 conserved hypotheticals |
| Rv2489c | 1 | 0 | 1,56554878 conserved hypotheticals |
| Rv2491  | 1 | 0 | 1,56554878 conserved hypotheticals |
| Rv2492  | 3 | 0 | 1,56554878 conserved hypotheticals |

|         |   |   |                                    |
|---------|---|---|------------------------------------|
| Rv2510c | 4 | 0 | 1,56554878 conserved hypotheticals |
| Rv2529  | 0 | 0 | 1,56554878 conserved hypotheticals |
| Rv2542  | 1 | 0 | 1,56554878 conserved hypotheticals |
| Rv2559c | 1 | 0 | 1,56554878 conserved hypotheticals |
| Rv2565  | 2 | 0 | 1,56554878 conserved hypotheticals |
| Rv2566  | 1 | 0 | 1,56554878 conserved hypotheticals |
| Rv2568c | 2 | 0 | 1,56554878 conserved hypotheticals |
| Rv2569c | 2 | 0 | 1,56554878 conserved hypotheticals |
| Rv2573  | 0 | 0 | 1,56554878 conserved hypotheticals |
| Rv2577  | 1 | 0 | 1,56554878 conserved hypotheticals |
| Rv2578c | 0 | 0 | 1,56554878 conserved hypotheticals |
| Rv2598  | 0 | 0 | 1,56554878 conserved hypotheticals |
| Rv2614A | 0 | 0 | 1,56554878 conserved hypotheticals |
| Rv2616  | 2 | 0 | 1,56554878 conserved hypotheticals |
| Rv2618  | 2 | 0 | 1,56554878 conserved hypotheticals |
| Rv2635  | 0 | 0 | 1,56554878 conserved hypotheticals |
| Rv2644c | 0 | 0 | 1,56554878 conserved hypotheticals |
| Rv2670c | 1 | 0 | 1,56554878 conserved hypotheticals |
| Rv2706c | 0 | 0 | 1,56554878 conserved hypotheticals |
| Rv2735c | 3 | 0 | 1,56554878 conserved hypotheticals |
| Rv2737A | 0 | 0 | 1,56554878 conserved hypotheticals |
| Rv2738c | 0 | 0 | 1,56554878 conserved hypotheticals |
| Rv2762c | 0 | 0 | 1,56554878 conserved hypotheticals |
| Rv2797c | 1 | 0 | 1,56554878 conserved hypotheticals |
| Rv2803  | 1 | 0 | 1,56554878 conserved hypotheticals |
| Rv2804c | 0 | 0 | 1,56554878 conserved hypotheticals |
| Rv2807  | 0 | 0 | 1,56554878 conserved hypotheticals |
| Rv2811  | 0 | 0 | 1,56554878 conserved hypotheticals |
| Rv2813  | 0 | 0 | 1,56554878 conserved hypotheticals |
| Rv2817c | 0 | 0 | 1,56554878 conserved hypotheticals |
| Rv2821c | 0 | 0 | 1,56554878 conserved hypotheticals |
| Rv2823c | 2 | 0 | 1,56554878 conserved hypotheticals |
| Rv2854  | 2 | 0 | 1,56554878 conserved hypotheticals |
| Rv2891  | 0 | 0 | 1,56554878 conserved hypotheticals |

|         |   |   |                                    |
|---------|---|---|------------------------------------|
| Rv2917  | 1 | 0 | 1,56554878 conserved hypotheticals |
| Rv2974c | 0 | 0 | 1,56554878 conserved hypotheticals |
| Rv2983  | 1 | 0 | 1,56554878 conserved hypotheticals |
| Rv3030  | 1 | 0 | 1,56554878 conserved hypotheticals |
| Rv3031  | 0 | 0 | 1,56554878 conserved hypotheticals |
| Rv3033  | 0 | 0 | 1,56554878 conserved hypotheticals |
| Rv3035  | 1 | 0 | 1,56554878 conserved hypotheticals |
| Rv3040c | 1 | 0 | 1,56554878 conserved hypotheticals |
| Rv3071  | 1 | 0 | 1,56554878 conserved hypotheticals |
| Rv3090  | 1 | 0 | 1,56554878 conserved hypotheticals |
| Rv3096  | 1 | 0 | 1,56554878 conserved hypotheticals |
| Rv3103c | 2 | 0 | 1,56554878 conserved hypotheticals |
| Rv3108  | 0 | 0 | 1,56554878 conserved hypotheticals |
| Rv3114  | 1 | 0 | 1,56554878 conserved hypotheticals |
| Rv3129  | 3 | 0 | 1,56554878 conserved hypotheticals |
| Rv3178  | 0 | 0 | 1,56554878 conserved hypotheticals |
| Rv3196  | 0 | 0 | 1,56554878 conserved hypotheticals |
| Rv3209  | 4 | 0 | 1,56554878 conserved hypotheticals |
| Rv3218  | 0 | 0 | 1,56554878 conserved hypotheticals |
| Rv3235  | 0 | 0 | 1,56554878 conserved hypotheticals |
| Rv3259  | 1 | 0 | 1,56554878 conserved hypotheticals |
| Rv3267  | 4 | 0 | 1,56554878 conserved hypotheticals |
| Rv3292  | 1 | 0 | 1,56554878 conserved hypotheticals |
| Rv3294c | 0 | 0 | 1,56554878 conserved hypotheticals |
| Rv3300c | 2 | 0 | 1,56554878 conserved hypotheticals |
| Rv3333c | 1 | 0 | 1,56554878 conserved hypotheticals |
| Rv3351c | 2 | 0 | 1,56554878 conserved hypotheticals |
| Rv3354  | 2 | 0 | 1,56554878 conserved hypotheticals |
| Rv3361c | 0 | 0 | 1,56554878 conserved hypotheticals |
| Rv3394c | 0 | 0 | 1,56554878 conserved hypotheticals |
| Rv3395c | 2 | 0 | 1,56554878 conserved hypotheticals |
| Rv3421c | 1 | 0 | 1,56554878 conserved hypotheticals |
| Rv3433c | 0 | 0 | 1,56554878 conserved hypotheticals |
| Rv3440c | 4 | 0 | 1,56554878 conserved hypotheticals |

|         |    |    |                                    |    |
|---------|----|----|------------------------------------|----|
| Rv3471c | 2  | 0  | 1,56554878 conserved hypotheticals |    |
| Rv3486  | 2  | 0  | 1,56554878 conserved hypotheticals |    |
| Rv3488  | 1  | 0  | 1,56554878 conserved hypotheticals |    |
| Rv3493c | 1  | 0  | 1,56554878 conserved hypotheticals |    |
| Rv3510c | 0  | 0  | 1,56554878 conserved hypotheticals |    |
| Rv3517  | 3  | 0  | 1,56554878 conserved hypotheticals |    |
| Rv3542c | 3  | 0  | 1,56554878 conserved hypotheticals |    |
| Rv3577  | 2  | 0  | 1,56554878 conserved hypotheticals |    |
| Rv3586  | 0  | 0  | 1,56554878 conserved hypotheticals |    |
| Rv3639c | 1  | 0  | 1,56554878 conserved hypotheticals |    |
| Rv3643  | 0  | 0  | 1,56554878 conserved hypotheticals |    |
| Rv3659c | 1  | 0  | 1,56554878 conserved hypotheticals |    |
| Rv3714c | 0  | 0  | 1,56554878 conserved hypotheticals |    |
| Rv3717  | 1  | 0  | 1,56554878 conserved hypotheticals |    |
| Rv3718c | 3  | 0  | 1,56554878 conserved hypotheticals |    |
| Rv3748  | 3  | 0  | 1,56554878 conserved hypotheticals |    |
| Rv3776  | 2  | 0  | 1,56554878 conserved hypotheticals |    |
| Rv3786c | 1  | 0  | 1,56554878 conserved hypotheticals |    |
| Rv3796  | 1  | 0  | 1,56554878 conserved hypotheticals |    |
| Rv3818  | 2  | 0  | 1,56554878 conserved hypotheticals |    |
| Rv3819  | 2  | 0  | 1,56554878 conserved hypotheticals |    |
| Rv3831  | 3  | 0  | 1,56554878 conserved hypotheticals |    |
| Rv3832c | 4  | 0  | 1,56554878 conserved hypotheticals |    |
| Rv3839  | 2  | 0  | 1,56554878 conserved hypotheticals |    |
| Rv3845  | 1  | 0  | 1,56554878 conserved hypotheticals |    |
| Rv3861  | 1  | 0  | 1,56554878 conserved hypotheticals |    |
| Rv3899c | 2  | 0  | 1,56554878 conserved hypotheticals |    |
| Rv3903c | 4  | 0  | 1,56554878 conserved hypotheticals |    |
| Rv3912  | 0  | 0  | 1,56554878 conserved hypotheticals |    |
| Rv4011  | 8  | 7  | 0,174733036                        | NA |
| Rv4001  | 48 | 20 | 0,375136227                        | NA |
| Rv4004  | 4  | 4  | 0,413484436                        | NA |
| Rv4012  | 9  | 5  | 0,879377032                        | NA |
| Rv4005  | 40 | 6  | 0,947047444                        | NA |

|        |    |   |             |    |
|--------|----|---|-------------|----|
| Rv4002 | 8  | 3 | 1,143564814 | NA |
| Rv4007 | 15 | 2 | 1,146799395 | NA |
| Rv4010 | 13 | 3 | 1,56554878  | NA |
| Rv4006 | 0  | 0 | 1,56554878  | NA |
| Rv4008 | 1  | 0 | 1,56554878  | NA |
| Rv4009 | 2  | 0 | 1,56554878  | NA |
| Rv4013 | 0  | 0 | 1,56554878  | NA |

---

NA: Non annotated

**Convention Description**

**DE (reads)** Read count mapping to sense strand of gene - Dextrose exponential  
**FE (reads)** Read count mapping to sense strand of gene - Fatty Acids exponential

Upper part: TRUE significant  
Lower part: FALSE significant

**Table S1C. DEGseq Test in Exponential Phase of Growth**

| <b>Gene Names</b> | <b>DE (reads)</b> | <b>FE (reads)</b> | <b>log2 (Fold_change)</b> | <b>log2 (Fold_change) normalized</b> | <b>z-score</b> | <b>p-value</b> | <b>q-value (1)</b> | <b>q-value (2)</b> | <b>Signature (p-value &lt; 0,001)</b> |
|-------------------|-------------------|-------------------|---------------------------|--------------------------------------|----------------|----------------|--------------------|--------------------|---------------------------------------|
| Rv0001            | 525               | 44                | 3,576741994               | 1,577580212                          | 10,657616      | 1,61E-26       | 1,91E-25           | 4,34E-26           | TRUE                                  |
| Rv0002            | 1175              | 123               | 3,255930536               | 1,256768754                          | 13,429623      | 4,05E-41       | 7,96E-40           | 1,81E-40           | TRUE                                  |
| Rv0006            | 3223              | 722               | 2,158333446               | 0,159171664                          | 3,4093735      | 0,0006511      | 0,001470806        | 0,00033375         | TRUE                                  |
| Rv0007            | 697               | 225               | 1,631233655               | -0,367928127                         | -4,012763      | 6,00E-05       | 0,000157059        | 3,56E-05           | TRUE                                  |
| Rv0009            | 661               | 60                | 3,461615866               | 1,462454084                          | 11,309616      | 1,18E-29       | 1,60E-28           | 3,64E-29           | TRUE                                  |
| Rv0010c           | 258               | 27                | 3,256339753               | 1,257177971                          | 6,293484       | 3,10E-10       | 1,47E-09           | 3,34E-10           | TRUE                                  |
| Rv0011c           | 236               | 33                | 2,83824893                | 0,839087148                          | 4,3192988      | 1,57E-05       | 4,45E-05           | 1,01E-05           | TRUE                                  |
| Rv0014c           | 969               | 81                | 3,580502853               | 1,581341071                          | 14,505258      | 1,12E-47       | 2,62E-46           | 5,94E-47           | TRUE                                  |
| Rv0015c           | 845               | 135               | 2,645991934               | 0,646830152                          | 6,5147834      | 7,28E-11       | 3,63E-10           | 8,25E-11           | TRUE                                  |
| Rv0016c           | 512               | 73                | 2,810175441               | 0,811013659                          | 6,179486       | 6,43E-10       | 2,97E-09           | 6,73E-10           | TRUE                                  |
| Rv0017c           | 705               | 93                | 2,922320636               | 0,923158854                          | 8,0953592      | 5,71E-16       | 4,00E-15           | 9,08E-16           | TRUE                                  |
| Rv0018c           | 938               | 125               | 2,907659828               | 0,908498046                          | 9,2133058      | 3,16E-20       | 2,77E-19           | 6,29E-20           | TRUE                                  |
| Rv0020c           | 1877              | 284               | 2,724465815               | 0,725304033                          | 10,743011      | 6,39E-27       | 7,73E-26           | 1,75E-26           | TRUE                                  |
| Rv0021c           | 189               | 24                | 2,977279923               | 0,978118142                          | 4,3984944      | 1,09E-05       | 3,16E-05           | 7,18E-06           | TRUE                                  |
| Rv0024            | 140               | 18                | 2,959358016               | 0,960196234                          | 3,7277803      | 0,0001932      | 0,000474099        | 0,00010758         | TRUE                                  |
| Rv0025            | 117               | 10                | 3,548436625               | 1,549274843                          | 4,964907       | 6,87E-07       | 2,28E-06           | 5,16E-07           | TRUE                                  |
| Rv0030            | 228               | 14                | 4,025535092               | 2,02637331                           | 8,3459722      | 7,06E-17       | 5,10E-16           | 1,16E-16           | TRUE                                  |
| Rv0039c           | 91                | 89                | 0,032061209               | -1,967100573                         | -10,2255       | 1,52E-24       | 1,71E-23           | 3,88E-24           | TRUE                                  |
| Rv0040c           | 738               | 91                | 3,019682366               | 1,020520584                          | 9,003029       | 2,20E-19       | 1,85E-18           | 4,21E-19           | TRUE                                  |
| Rv0041            | 907               | 116               | 2,966977745               | 0,967815964                          | 9,5525179      | 1,27E-21       | 1,18E-20           | 2,68E-21           | TRUE                                  |
| Rv0043c           | 160               | 115               | 0,476438044               | -1,522723738                         | -9,718229      | 2,52E-22       | 2,46E-21           | 5,59E-22           | TRUE                                  |
| Rv0046c           | 436               | 168               | 1,375866902               | -0,62329488                          | -5,619372      | 1,92E-08       | 7,66E-08           | 1,74E-08           | TRUE                                  |
| Rv0047c           | 216               | 28                | 2,94753258                | 0,948370798                          | 4,5827714      | 4,59E-06       | 1,39E-05           | 3,16E-06           | TRUE                                  |
| Rv0048c           | 228               | 12                | 4,247927513               | 2,248765732                          | 8,9117695      | 5,02E-19       | 4,08E-18           | 9,27E-19           | TRUE                                  |
| Rv0050            | 1478              | 220               | 2,748070841               | 0,748909059                          | 9,8022018      | 1,10E-22       | 1,11E-21           | 2,51E-22           | TRUE                                  |

|         |      |      |              |              |           |           |             |            |      |
|---------|------|------|--------------|--------------|-----------|-----------|-------------|------------|------|
| Rv0053  | 246  | 34   | 2,855051664  | 0,855889882  | 4,4850976 | 7,29E-06  | 2,16E-05    | 4,89E-06   | TRUE |
| Rv0054  | 437  | 72   | 2,601564468  | 0,602402686  | 4,3965536 | 1,10E-05  | 3,19E-05    | 7,24E-06   | TRUE |
| Rv0055  | 585  | 43   | 3,76602806   | 1,766866278  | 12,193463 | 3,37E-34  | 5,36E-33    | 1,22E-33   | TRUE |
| Rv0056  | 1281 | 147  | 3,123382416  | 1,124220634  | 12,83525  | 1,04E-37  | 1,84E-36    | 4,18E-37   | TRUE |
| Rv0058  | 1173 | 511  | 1,198807817  | -0,800353965 | -12,20768 | 2,83E-34  | 4,53E-33    | 1,03E-33   | TRUE |
| Rv0060  | 957  | 106  | 3,17445466   | 1,175292878  | 11,49497  | 1,40E-30  | 1,99E-29    | 4,52E-30   | TRUE |
| Rv0062  | 264  | 41   | 2,686842115  | 0,687680333  | 3,8435912 | 0,0001212 | 0,000303233 | 6,88E-05   | TRUE |
| Rv0066c | 812  | 159  | 2,352452962  | 0,35329118   | 3,6701903 | 0,0002424 | 0,000588613 | 0,00013357 | TRUE |
| Rv0070c | 84   | 9    | 3,222392421  | 1,223230639  | 3,5145789 | 0,0004405 | 0,001026983 | 0,00023297 | TRUE |
| Rv0072  | 795  | 109  | 2,866626725  | 0,867464944  | 8,1564578 | 3,45E-16  | 2,43E-15    | 5,51E-16   | TRUE |
| Rv0074  | 493  | 173  | 1,510815609  | -0,488346173 | -4,573532 | 4,80E-06  | 1,45E-05    | 3,29E-06   | TRUE |
| Rv0076c | 31   | 1    | 4,95419631   | 2,955034529  | 3,8206038 | 0,0001331 | 0,000331573 | 7,52E-05   | TRUE |
| Rv0078  | 82   | 3    | 4,772589504  | 2,773427722  | 6,0184156 | 1,76E-09  | 7,86E-09    | 1,78E-09   | TRUE |
| Rv0078A | 479  | 57   | 3,070991832  | 1,07183005   | 7,5500091 | 4,35E-14  | 2,71E-13    | 6,14E-14   | TRUE |
| Rv0078B | 1464 | 229  | 2,67649605   | 0,677334268  | 8,9334593 | 4,13E-19  | 3,37E-18    | 7,65E-19   | TRUE |
| Rv0079  | 864  | 1054 | -0,286771649 | -2,285933431 | -38,71405 | 0         | 0           | 0          | TRUE |
| Rv0080  | 363  | 143  | 1,343954401  | -0,655207381 | -5,419685 | 5,97E-08  | 2,25E-07    | 5,11E-08   | TRUE |
| Rv0081  | 277  | 24   | 3,528779665  | 1,529617883  | 7,5683938 | 3,78E-14  | 2,37E-13    | 5,39E-14   | TRUE |
| Rv0082  | 177  | 16   | 3,46760555   | 1,468443768  | 5,8697765 | 4,36E-09  | 1,85E-08    | 4,21E-09   | TRUE |
| Rv0087  | 150  | 20   | 2,906890596  | 0,907728814  | 3,6811012 | 0,0002322 | 0,000565202 | 0,00012822 | TRUE |
| Rv0091  | 117  | 3    | 5,285402219  | 3,286240437  | 7,7939645 | 6,49E-15  | 4,24E-14    | 9,62E-15   | TRUE |
| Rv0096  | 172  | 4    | 5,426264755  | 3,427102973  | 9,617417  | 6,75E-22  | 6,45E-21    | 1,46E-21   | TRUE |
| Rv0097  | 154  | 11   | 3,807354922  | 1,80819314   | 6,3563981 | 2,07E-10  | 9,93E-10    | 2,25E-10   | TRUE |
| Rv0098  | 240  | 7    | 5,099535674  | 3,100373892  | 10,876252 | 1,50E-27  | 1,87E-26    | 4,24E-27   | TRUE |
| Rv0099  | 514  | 84   | 2,613307126  | 0,614145345  | 4,8513361 | 1,23E-06  | 4,00E-06    | 9,09E-07   | TRUE |
| Rv0101  | 1834 | 291  | 2,655902581  | 0,656740799  | 9,7303278 | 2,24E-22  | 2,19E-21    | 4,97E-22   | TRUE |
| Rv0103c | 1411 | 225  | 2,648721081  | 0,649559299  | 8,4511297 | 2,88E-17  | 2,13E-16    | 4,84E-17   | TRUE |
| Rv0107c | 911  | 343  | 1,409242478  | -0,589919304 | -7,644748 | 2,09E-14  | 1,33E-13    | 3,03E-14   | TRUE |
| Rv0108c | 549  | 81   | 2,760812336  | 0,761650554  | 6,0610864 | 1,35E-09  | 6,09E-09    | 1,38E-09   | TRUE |
| Rv0112  | 289  | 19   | 3,926998169  | 1,927836387  | 9,0934607 | 9,59E-20  | 8,26E-19    | 1,87E-19   | TRUE |
| Rv0113  | 217  | 8    | 4,761551232  | 2,762389451  | 9,7703559 | 1,51E-22  | 1,50E-21    | 3,40E-22   | TRUE |
| Rv0114  | 149  | 71   | 1,069421401  | -0,929740381 | -5,166854 | 2,38E-07  | 8,43E-07    | 1,91E-07   | TRUE |
| Rv0115  | 127  | 62   | 1,034488376  | -0,964673405 | -4,979422 | 6,38E-07  | 2,12E-06    | 4,81E-07   | TRUE |
| Rv0116c | 252  | 20   | 3,655351829  | 1,656190047  | 7,6465087 | 2,07E-14  | 1,32E-13    | 2,99E-14   | TRUE |
| Rv0118c | 250  | 174  | 0,522840789  | -1,476320993 | -11,68377 | 1,54E-31  | 2,24E-30    | 5,08E-31   | TRUE |
| Rv0120c | 348  | 165  | 1,076621282  | -0,9225405   | -7,825981 | 5,04E-15  | 3,33E-14    | 7,56E-15   | TRUE |
| Rv0125  | 510  | 94   | 2,439764585  | 0,440602803  | 3,5727625 | 0,0003532 | 0,00084128  | 0,0001909  | TRUE |



|         |      |     |             |              |           |           |             |            |      |
|---------|------|-----|-------------|--------------|-----------|-----------|-------------|------------|------|
| Rv0126  | 654  | 72  | 3,183221824 | 1,184060042  | 9,5583557 | 1,20E-21  | 1,12E-20    | 2,55E-21   | TRUE |
| Rv0127  | 525  | 90  | 2,544320516 | 0,545158734  | 4,4045893 | 1,06E-05  | 3,08E-05    | 6,98E-06   | TRUE |
| Rv0129c | 1659 | 212 | 2,968177716 | 0,969015935  | 12,934584 | 2,87E-38  | 5,24E-37    | 1,19E-37   | TRUE |
| Rv0133  | 178  | 80  | 1,153805336 | -0,845356446 | -5,060283 | 4,19E-07  | 1,44E-06    | 3,26E-07   | TRUE |
| Rv0134  | 744  | 245 | 1,602520872 | -0,39664091  | -4,491761 | 7,06E-06  | 2,09E-05    | 4,75E-06   | TRUE |
| Rv0139  | 225  | 82  | 1,456229187 | -0,542932595 | -3,467421 | 0,0005255 | 0,001212688 | 0,0002751  | TRUE |
| Rv0141c | 289  | 45  | 2,683072586 | 0,683910804  | 4,0020564 | 6,28E-05  | 0,000164014 | 3,72E-05   | TRUE |
| Rv0143c | 297  | 155 | 0,938194716 | -1,060967066 | -8,516384 | 1,65E-17  | 1,24E-16    | 2,81E-17   | TRUE |
| Rv0144  | 1021 | 397 | 1,362771954 | -0,636389828 | -8,801652 | 1,35E-18  | 1,06E-17    | 2,41E-18   | TRUE |
| Rv0145  | 1094 | 623 | 0,81230867  | -1,186853112 | -18,69423 | 5,52E-78  | 2,47E-76    | 5,61E-77   | TRUE |
| Rv0146  | 179  | 73  | 1,293991218 | -0,705170563 | -4,131373 | 3,61E-05  | 9,79E-05    | 2,22E-05   | TRUE |
| Rv0147  | 895  | 121 | 2,886880635 | 0,887718853  | 8,8254627 | 1,09E-18  | 8,76E-18    | 1,99E-18   | TRUE |
| Rv0148  | 502  | 84  | 2,579226131 | 0,580064349  | 4,5551314 | 5,24E-06  | 1,58E-05    | 3,58E-06   | TRUE |
| Rv0155  | 472  | 76  | 2,634715536 | 0,635553754  | 4,7930966 | 1,64E-06  | 5,29E-06    | 1,20E-06   | TRUE |
| Rv0156  | 61   | 1   | 5,930737338 | 3,931575556  | 6,020446  | 1,74E-09  | 7,78E-09    | 1,76E-09   | TRUE |
| Rv0157  | 627  | 119 | 2,397503869 | 0,398342088  | 3,6079106 | 0,0003087 | 0,000740514 | 0,00016804 | TRUE |
| Rv0158  | 361  | 27  | 3,740967525 | 1,741805743  | 9,4835246 | 2,46E-21  | 2,28E-20    | 5,16E-21   | TRUE |
| Rv0159c | 64   | 1   | 6           | 4,000838218  | 6,2004843 | 5,63E-10  | 2,61E-09    | 5,92E-10   | TRUE |
| Rv0162c | 108  | 45  | 1,263034406 | -0,736127376 | -3,367884 | 0,0007575 | 0,001685938 | 0,00038257 | TRUE |
| Rv0164  | 283  | 29  | 3,286677248 | 1,287515466  | 6,7150437 | 1,88E-11  | 9,83E-11    | 2,23E-11   | TRUE |
| Rv0165c | 210  | 29  | 2,856264523 | 0,857102741  | 4,1489132 | 3,34E-05  | 9,11E-05    | 2,07E-05   | TRUE |
| Rv0167  | 1089 | 198 | 2,459431619 | 0,460269837  | 5,4360014 | 5,45E-08  | 2,06E-07    | 4,68E-08   | TRUE |
| Rv0168  | 858  | 139 | 2,625892765 | 0,626730983  | 6,382939  | 1,74E-10  | 8,45E-10    | 1,92E-10   | TRUE |
| Rv0169  | 1530 | 188 | 3,024727086 | 1,025565304  | 13,017795 | 9,69E-39  | 1,79E-37    | 4,07E-38   | TRUE |
| Rv0170  | 2116 | 275 | 2,943836104 | 0,944674322  | 14,302524 | 2,11E-46  | 4,76E-45    | 1,08E-45   | TRUE |
| Rv0171  | 2019 | 319 | 2,662012582 | 0,6628508    | 10,293805 | 7,51E-25  | 8,52E-24    | 1,93E-24   | TRUE |
| Rv0172  | 1747 | 211 | 3,049564704 | 1,050402922  | 14,186631 | 1,11E-45  | 2,44E-44    | 5,54E-45   | TRUE |
| Rv0173  | 1947 | 421 | 2,209360746 | 0,210198964  | 3,4673425 | 0,0005256 | 0,001212334 | 0,0002751  | TRUE |
| Rv0174  | 3351 | 561 | 2,578519011 | 0,579357229  | 11,763906 | 5,99E-32  | 8,88E-31    | 2,01E-31   | TRUE |
| Rv0175  | 1101 | 540 | 1,027783157 | -0,971378625 | -14,78612 | 1,80E-49  | 4,55E-48    | 1,03E-48   | TRUE |
| Rv0177  | 1095 | 137 | 2,998683072 | 0,99952129   | 10,780781 | 4,24E-27  | 5,18E-26    | 1,18E-26   | TRUE |
| Rv0179c | 420  | 24  | 4,129283017 | 2,130121235  | 11,695591 | 1,34E-31  | 1,96E-30    | 4,45E-31   | TRUE |
| Rv0180c | 249  | 29  | 3,102020937 | 1,102859155  | 5,570809  | 2,54E-08  | 1,00E-07    | 2,27E-08   | TRUE |
| Rv0186A | 540  | 338 | 0,675936161 | -1,323225621 | -14,98981 | 8,56E-51  | 2,24E-49    | 5,07E-50   | TRUE |
| Rv0188  | 230  | 31  | 2,891293741 | 0,892131959  | 4,4921084 | 7,05E-06  | 2,09E-05    | 4,75E-06   | TRUE |
| Rv0190  | 462  | 317 | 0,543410011 | -1,455751771 | -15,60759 | 6,46E-55  | 1,87E-53    | 4,25E-54   | TRUE |
| Rv0194  | 59   | 3   | 4,297680549 | 2,298518767  | 4,5938025 | 4,35E-06  | 1,33E-05    | 3,01E-06   | TRUE |

|         |      |     |              |              |           |           |             |            |      |
|---------|------|-----|--------------|--------------|-----------|-----------|-------------|------------|------|
| Rv0196  | 76   | 4   | 4,247927513  | 2,248765732  | 5,1451092 | 2,67E-07  | 9,41E-07    | 2,13E-07   | TRUE |
| Rv0197  | 179  | 10  | 4,161887682  | 2,1627259    | 7,7081995 | 1,28E-14  | 8,24E-14    | 1,87E-14   | TRUE |
| Rv0198c | 901  | 112 | 3,008028374  | 1,008866592  | 9,8543169 | 6,57E-23  | 6,66E-22    | 1,51E-22   | TRUE |
| Rv0202c | 1264 | 378 | 1,741538324  | -0,257623458 | -3,71275  | 0,000205  | 0,000502234 | 0,00011397 | TRUE |
| Rv0204c | 298  | 42  | 2,826851098  | 0,827689316  | 4,7972168 | 1,61E-06  | 5,20E-06    | 1,18E-06   | TRUE |
| Rv0205  | 292  | 46  | 2,666262603  | 0,667100821  | 3,935349  | 8,31E-05  | 0,000213732 | 4,85E-05   | TRUE |
| Rv0206c | 2391 | 817 | 1,549206147  | -0,449955635 | -9,2246   | 2,85E-20  | 2,51E-19    | 5,69E-20   | TRUE |
| Rv0210  | 147  | 63  | 1,222392421  | -0,776769361 | -4,175498 | 2,97E-05  | 8,14E-05    | 1,85E-05   | TRUE |
| Rv0211  | 1965 | 653 | 1,589374416  | -0,409787366 | -7,562033 | 3,97E-14  | 2,49E-13    | 5,65E-14   | TRUE |
| Rv0212c | 131  | 16  | 3,033423002  | 1,03426122   | 3,8345741 | 0,0001258 | 0,000314176 | 7,13E-05   | TRUE |
| Rv0213c | 66   | 6   | 3,459431619  | 1,460269837  | 3,5693531 | 0,0003579 | 0,000851019 | 0,00019305 | TRUE |
| Rv0220  | 786  | 467 | 0,751106763  | -1,248055019 | -16,83828 | 1,28E-63  | 4,46E-62    | 1,01E-62   | TRUE |
| Rv0223c | 132  | 68  | 0,956931278  | -1,042230504 | -5,558861 | 2,72E-08  | 1,07E-07    | 2,43E-08   | TRUE |
| Rv0227c | 1025 | 120 | 3,094517599  | 1,095355817  | 11,242085 | 2,53E-29  | 3,39E-28    | 7,69E-29   | TRUE |
| Rv0229c | 94   | 6   | 3,969626351  | 1,970464569  | 5,2616502 | 1,43E-07  | 5,18E-07    | 1,17E-07   | TRUE |
| Rv0232  | 340  | 54  | 2,654503434  | 0,655341652  | 4,1802038 | 2,91E-05  | 7,98E-05    | 1,81E-05   | TRUE |
| Rv0235c | 538  | 59  | 3,188819313  | 1,189657531  | 8,7016721 | 3,27E-18  | 2,56E-17    | 5,81E-18   | TRUE |
| Rv0236A | 379  | 43  | 3,139789283  | 1,140627502  | 7,0620422 | 1,64E-12  | 9,34E-12    | 2,12E-12   | TRUE |
| Rv0238  | 251  | 31  | 3,017347244  | 1,018185462  | 5,24005   | 1,61E-07  | 5,79E-07    | 1,31E-07   | TRUE |
| Rv0240  | 122  | 8   | 3,930737338  | 1,931575556  | 5,915747  | 3,30E-09  | 1,43E-08    | 3,24E-09   | TRUE |
| Rv0241c | 522  | 210 | 1,313660479  | -0,685501303 | -6,835829 | 8,15E-12  | 4,38E-11    | 9,94E-12   | TRUE |
| Rv0242c | 1238 | 438 | 1,49900854   | -0,500153242 | -7,439841 | 1,01E-13  | 6,13E-13    | 1,39E-13   | TRUE |
| Rv0243  | 1657 | 612 | 1,436970045  | -0,562191737 | -9,780984 | 1,36E-22  | 1,35E-21    | 3,07E-22   | TRUE |
| Rv0244c | 494  | 85  | 2,538976295  | 0,539814514  | 4,2345757 | 2,29E-05  | 6,38E-05    | 1,45E-05   | TRUE |
| Rv0245  | 208  | 16  | 3,700439718  | 1,701277936  | 7,0804874 | 1,44E-12  | 8,19E-12    | 1,86E-12   | TRUE |
| Rv0249c | 1700 | 133 | 3,676036596  | 1,676874814  | 20,041137 | 2,41E-89  | 1,25E-87    | 2,84E-88   | TRUE |
| Rv0252  | 198  | 220 | -0,152003093 | -2,151164875 | -17,03043 | 4,88E-65  | 1,74E-63    | 3,94E-64   | TRUE |
| Rv0254c | 41   | 42  | -0,034765418 | -2,0339272   | -7,179293 | 7,01E-13  | 4,07E-12    | 9,24E-13   | TRUE |
| Rv0255c | 189  | 89  | 1,086508993  | -0,912652789 | -5,695457 | 1,23E-08  | 5,03E-08    | 1,14E-08   | TRUE |
| Rv0256c | 171  | 25  | 2,773996325  | 0,774834543  | 3,4331042 | 0,0005967 | 0,001358012 | 0,00030816 | TRUE |
| Rv0261c | 21   | 0   | 5,392317423  | 3,393155641  | 3,3467983 | 0,0008175 | 0,001810866 | 0,0004108  | TRUE |
| Rv0265c | 361  | 45  | 3,004001931  | 1,004840149  | 6,2163636 | 5,09E-10  | 2,37E-09    | 5,38E-10   | TRUE |
| Rv0269c | 156  | 20  | 2,963474124  | 0,964312342  | 3,9490985 | 7,84E-05  | 0,000202349 | 4,59E-05   | TRUE |
| Rv0270  | 1027 | 386 | 1,411763429  | -0,587398353 | -8,078994 | 6,53E-16  | 4,55E-15    | 1,03E-15   | TRUE |
| Rv0271c | 498  | 64  | 2,960001932  | 0,96084015   | 7,0351887 | 1,99E-12  | 1,13E-11    | 2,56E-12   | TRUE |
| Rv0273c | 101  | 5   | 4,336283388  | 2,337121606  | 6,0706808 | 1,27E-09  | 5,75E-09    | 1,31E-09   | TRUE |
| Rv0274  | 425  | 16  | 4,731319031  | 2,732157249  | 13,595061 | 4,28E-42  | 8,66E-41    | 1,97E-41   | TRUE |

|         |      |      |             |              |           |           |             |            |      |
|---------|------|------|-------------|--------------|-----------|-----------|-------------|------------|------|
| Rv0275c | 183  | 17   | 3,428236997 | 1,429075215  | 5,8481926 | 4,97E-09  | 2,10E-08    | 4,77E-09   | TRUE |
| Rv0276  | 1482 | 176  | 3,073898114 | 1,074736332  | 13,312129 | 1,97E-40  | 3,77E-39    | 8,55E-40   | TRUE |
| Rv0277c | 359  | 26   | 3,787400316 | 1,788238534  | 9,6315057 | 5,89E-22  | 5,63E-21    | 1,28E-21   | TRUE |
| Rv0280  | 1935 | 108  | 4,163230349 | 2,164068567  | 25,359412 | 7,08E-142 | 6,64E-140   | 1,51E-140  | TRUE |
| Rv0281  | 1376 | 137  | 3,328232672 | 1,32907089   | 15,17816  | 4,93E-52  | 1,35E-50    | 3,07E-51   | TRUE |
| Rv0282  | 6139 | 1138 | 2,431503112 | 0,43234133   | 12,197655 | 3,20E-34  | 5,11E-33    | 1,16E-33   | TRUE |
| Rv0284  | 5029 | 798  | 2,655810902 | 0,65664912   | 16,122548 | 1,77E-58  | 5,46E-57    | 1,24E-57   | TRUE |
| Rv0285  | 357  | 188  | 0,925191412 | -1,07397037  | -9,473081 | 2,72E-21  | 2,50E-20    | 5,67E-21   | TRUE |
| Rv0286  | 2983 | 464  | 2,684567267 | 0,685405485  | 12,890282 | 5,11E-38  | 9,19E-37    | 2,09E-37   | TRUE |
| Rv0288  | 1350 | 187  | 2,851849232 | 0,85268745   | 10,475796 | 1,12E-25  | 1,30E-24    | 2,95E-25   | TRUE |
| Rv0289  | 2152 | 649  | 1,729387695 | -0,269774087 | -5,085051 | 3,68E-07  | 1,27E-06    | 2,88E-07   | TRUE |
| Rv0290  | 1012 | 630  | 0,683785556 | -1,315376226 | -20,37547 | 2,76E-92  | 1,53E-90    | 3,48E-91   | TRUE |
| Rv0291  | 730  | 608  | 0,26382514  | -1,735336642 | -24,55187 | 4,13E-133 | 3,47E-131   | 7,86E-132  | TRUE |
| Rv0293c | 673  | 64   | 3,394462695 | 1,395300913  | 11,015296 | 3,22E-28  | 4,12E-27    | 9,34E-28   | TRUE |
| Rv0295c | 155  | 22   | 2,816692787 | 0,817531005  | 3,4232219 | 0,0006188 | 0,001404307 | 0,00031866 | TRUE |
| Rv0296c | 210  | 11   | 4,254813899 | 2,255652117  | 8,5686965 | 1,05E-17  | 7,95E-17    | 1,80E-17   | TRUE |
| Rv0297  | 235  | 115  | 1,031026896 | -0,968134886 | -6,802147 | 1,03E-11  | 5,48E-11    | 1,24E-11   | TRUE |
| Rv0299  | 165  | 23   | 2,842760258 | 0,843598476  | 3,628121  | 0,0002855 | 0,00068783  | 0,00015608 | TRUE |
| Rv0301  | 251  | 40   | 2,649615459 | 0,650453677  | 3,5678163 | 0,00036   | 0,000855251 | 0,00019407 | TRUE |
| Rv0309  | 1260 | 193  | 2,706750981 | 0,707589199  | 8,6122007 | 7,17E-18  | 5,50E-17    | 1,25E-17   | TRUE |
| Rv0311  | 143  | 12   | 3,574908836 | 1,575747054  | 5,5571716 | 2,74E-08  | 1,08E-07    | 2,45E-08   | TRUE |
| Rv0312  | 1000 | 105  | 3,251538767 | 1,252376985  | 12,354952 | 4,58E-35  | 7,53E-34    | 1,71E-34   | TRUE |
| Rv0314c | 397  | 35   | 3,50371218  | 1,504550398  | 8,9511428 | 3,52E-19  | 2,90E-18    | 6,59E-19   | TRUE |
| Rv0315  | 555  | 57   | 3,283453947 | 1,284292165  | 9,3859428 | 6,24E-21  | 5,63E-20    | 1,28E-20   | TRUE |
| Rv0320  | 68   | 2    | 5,087462841 | 3,088301059  | 5,7787632 | 7,53E-09  | 3,14E-08    | 7,13E-09   | TRUE |
| Rv0321  | 89   | 5    | 4,153805336 | 2,154643554  | 5,4224847 | 5,88E-08  | 2,22E-07    | 5,04E-08   | TRUE |
| Rv0323c | 44   | 25   | 0,815575429 | -1,183586353 | -3,734944 | 0,0001878 | 0,000461093 | 0,00010463 | TRUE |
| Rv0336  | 454  | 175  | 1,375337375 | -0,623824406 | -5,739631 | 9,49E-09  | 3,93E-08    | 8,91E-09   | TRUE |
| Rv0337c | 450  | 29   | 3,955800196 | 1,956638414  | 11,459598 | 2,10E-30  | 2,98E-29    | 6,75E-30   | TRUE |
| Rv0338c | 2660 | 356  | 2,901477099 | 0,902315318  | 15,43165  | 1,00E-53  | 2,87E-52    | 6,50E-53   | TRUE |
| Rv0339c | 224  | 11   | 4,347923303 | 2,348761522  | 9,0675329 | 1,22E-19  | 1,04E-18    | 2,36E-19   | TRUE |
| Rv0341  | 2547 | 1538 | 0,727743456 | -1,271418326 | -31,0283  | 2,24E-211 | 3,84E-209   | 8,71E-210  | TRUE |
| Rv0343  | 252  | 165  | 0,610957709 | -1,388204073 | -10,86308 | 1,73E-27  | 2,14E-26    | 4,86E-27   | TRUE |
| Rv0344c | 78   | 3    | 4,700439718 | 2,701277936  | 5,7890152 | 7,08E-09  | 2,97E-08    | 6,75E-09   | TRUE |
| Rv0346c | 919  | 295  | 1,639349907 | -0,359811875 | -4,500054 | 6,79E-06  | 2,02E-05    | 4,58E-06   | TRUE |
| Rv0349  | 88   | 10   | 3,137503524 | 1,138341742  | 3,3972568 | 0,0006807 | 0,001530494 | 0,0003473  | TRUE |
| Rv0350  | 2250 | 202  | 3,477497803 | 1,478336021  | 21,040348 | 2,80E-98  | 1,65E-96    | 3,74E-97   | TRUE |

|         |      |     |              |              |           |           |             |            |      |
|---------|------|-----|--------------|--------------|-----------|-----------|-------------|------------|------|
| Rv0351  | 790  | 76  | 3,37778133   | 1,378619548  | 11,826154 | 2,86E-32  | 4,27E-31    | 9,69E-32   | TRUE |
| Rv0352  | 1170 | 230 | 2,346802764  | 0,347640982  | 4,3397707 | 1,43E-05  | 4,08E-05    | 9,25E-06   | TRUE |
| Rv0353  | 343  | 37  | 3,212611401  | 1,213449619  | 7,0575101 | 1,70E-12  | 9,63E-12    | 2,19E-12   | TRUE |
| Rv0355c | 523  | 57  | 3,197777122  | 1,19861534   | 8,6306753 | 6,10E-18  | 4,72E-17    | 1,07E-17   | TRUE |
| Rv0363c | 890  | 150 | 2,568842835  | 0,569681053  | 5,9678941 | 2,40E-09  | 1,06E-08    | 2,40E-09   | TRUE |
| Rv0364  | 366  | 184 | 0,992137882  | -1,0070239   | -8,890108 | 6,10E-19  | 4,95E-18    | 1,12E-18   | TRUE |
| Rv0365c | 152  | 15  | 3,341036918  | 1,341875136  | 5,0808384 | 3,76E-07  | 1,30E-06    | 2,94E-07   | TRUE |
| Rv0373c | 82   | 92  | -0,166009951 | -2,165171733 | -11,05712 | 2,02E-28  | 2,60E-27    | 5,90E-28   | TRUE |
| Rv0379  | 656  | 72  | 3,187627003  | 1,188465221  | 9,6012448 | 7,90E-22  | 7,49E-21    | 1,70E-21   | TRUE |
| Rv0383c | 736  | 356 | 1,047828525  | -0,951333257 | -11,79697 | 4,05E-32  | 6,02E-31    | 1,37E-31   | TRUE |
| Rv0385  | 27   | 23  | 0,231325546  | -1,767836236 | -4,835582 | 1,33E-06  | 4,32E-06    | 9,81E-07   | TRUE |
| Rv0386  | 236  | 34  | 2,795180208  | 0,796018426  | 4,1282965 | 3,65E-05  | 9,91E-05    | 2,25E-05   | TRUE |
| Rv0389  | 128  | 65  | 0,977632187  | -1,021529595 | -5,34604  | 8,99E-08  | 3,35E-07    | 7,60E-08   | TRUE |
| Rv0392c | 189  | 14  | 3,754887502  | 1,75572572   | 6,899929  | 5,20E-12  | 2,83E-11    | 6,43E-12   | TRUE |
| Rv0394c | 143  | 18  | 2,989946335  | 0,990784553  | 3,8669778 | 0,0001102 | 0,000277699 | 6,30E-05   | TRUE |
| Rv0400c | 253  | 91  | 1,475198934  | -0,523962847 | -3,536768 | 0,0004051 | 0,000950916 | 0,00021574 | TRUE |
| Rv0402c | 295  | 47  | 2,649982293  | 0,650820511  | 3,8698869 | 0,0001089 | 0,000274933 | 6,24E-05   | TRUE |
| Rv0404  | 312  | 35  | 3,156119202  | 1,15695742   | 6,4807728 | 9,13E-11  | 4,52E-10    | 1,03E-10   | TRUE |
| Rv0405  | 1919 | 339 | 2,500997533  | 0,501835751  | 7,8128536 | 5,59E-15  | 3,66E-14    | 8,30E-15   | TRUE |
| Rv0407  | 158  | 20  | 2,981852653  | 0,982690871  | 4,037201  | 5,41E-05  | 0,000142228 | 3,23E-05   | TRUE |
| Rv0410c | 708  | 66  | 3,423211431  | 1,424049649  | 11,473637 | 1,79E-30  | 2,54E-29    | 5,76E-30   | TRUE |
| Rv0412c | 402  | 39  | 3,365649472  | 1,36648769   | 8,3789062 | 5,34E-17  | 3,90E-16    | 8,85E-17   | TRUE |
| Rv0418  | 665  | 62  | 3,42301422   | 1,423852438  | 11,118514 | 1,02E-28  | 1,33E-27    | 3,01E-28   | TRUE |
| Rv0423c | 1467 | 269 | 2,447190793  | 0,448029011  | 6,1551199 | 7,50E-10  | 3,46E-09    | 7,84E-10   | TRUE |
| Rv0425c | 1305 | 453 | 1,526466851  | -0,47269493  | -7,185022 | 6,72E-13  | 3,91E-12    | 8,87E-13   | TRUE |
| Rv0429c | 82   | 9   | 3,187627003  | 1,188465221  | 3,3941809 | 0,0006883 | 0,001543828 | 0,00035022 | TRUE |
| Rv0430  | 896  | 56  | 4            | 2,000838218  | 16,410418 | 1,61E-60  | 5,21E-59    | 1,18E-59   | TRUE |
| Rv0434  | 175  | 67  | 1,385121921  | -0,614039861 | -3,501301 | 0,000463  | 0,00107731  | 0,00024446 | TRUE |
| Rv0435c | 328  | 142 | 1,207804885  | -0,791356897 | -6,370808 | 1,88E-10  | 9,09E-10    | 2,06E-10   | TRUE |
| Rv0437c | 77   | 36  | 1,096861539  | -0,902300243 | -3,587486 | 0,0003339 | 0,000797596 | 0,00018099 | TRUE |
| Rv0439c | 103  | 9   | 3,516575526  | 1,517413744  | 4,5878498 | 4,48E-06  | 1,36E-05    | 3,09E-06   | TRUE |
| Rv0440  | 952  | 170 | 2,485426827  | 0,486265045  | 5,3453085 | 9,03E-08  | 3,36E-07    | 7,62E-08   | TRUE |
| Rv0443  | 2117 | 283 | 2,903147311  | 0,903985529  | 13,786676 | 3,07E-43  | 6,47E-42    | 1,47E-42   | TRUE |
| Rv0444c | 422  | 72  | 2,551174187  | 0,552012405  | 3,9937539 | 6,50E-05  | 0,00016953  | 3,85E-05   | TRUE |
| Rv0445c | 373  | 44  | 3,083600202  | 1,08443842   | 6,7259702 | 1,74E-11  | 9,17E-11    | 2,08E-11   | TRUE |
| Rv0447c | 295  | 42  | 2,812253721  | 0,81309194   | 4,7007045 | 2,59E-06  | 8,14E-06    | 1,85E-06   | TRUE |
| Rv0450c | 898  | 78  | 3,525169416  | 1,526007634  | 13,604834 | 3,75E-42  | 7,62E-41    | 1,73E-41   | TRUE |

|         |      |     |             |              |           |           |             |            |      |
|---------|------|-----|-------------|--------------|-----------|-----------|-------------|------------|------|
| Rv0451c | 101  | 2   | 5,658211483 | 3,659049701  | 7,5585298 | 4,08E-14  | 2,55E-13    | 5,79E-14   | TRUE |
| Rv0452  | 74   | 4   | 4,209453366 | 2,210291584  | 5,0234771 | 5,07E-07  | 1,71E-06    | 3,89E-07   | TRUE |
| Rv0453  | 31   | 0   | 5,95419631  | 3,955034529  | 4,2999342 | 1,71E-05  | 4,82E-05    | 1,09E-05   | TRUE |
| Rv0455c | 1036 | 129 | 3,005581032 | 1,00641925   | 10,545942 | 5,30E-26  | 6,21E-25    | 1,41E-25   | TRUE |
| Rv0458  | 384  | 136 | 1,497499659 | -0,501662122 | -4,155886 | 3,24E-05  | 8,85E-05    | 2,01E-05   | TRUE |
| Rv0459  | 207  | 101 | 1,035275475 | -0,963886307 | -6,351299 | 2,14E-10  | 1,02E-09    | 2,32E-10   | TRUE |
| Rv0461  | 365  | 53  | 2,783832199 | 0,784670417  | 5,0709797 | 3,96E-07  | 1,36E-06    | 3,09E-07   | TRUE |
| Rv0462  | 1523 | 176 | 3,113268608 | 1,114106826  | 13,894314 | 6,86E-44  | 1,46E-42    | 3,32E-43   | TRUE |
| Rv0466  | 563  | 57  | 3,304101098 | 1,304939316  | 9,5710274 | 1,06E-21  | 9,99E-21    | 2,27E-21   | TRUE |
| Rv0467  | 809  | 430 | 0,911803043 | -1,087358739 | -14,47446 | 1,76E-47  | 4,05E-46    | 9,20E-47   | TRUE |
| Rv0468  | 906  | 175 | 2,372156128 | 0,372994346  | 4,0791628 | 4,52E-05  | 0,000120203 | 2,73E-05   | TRUE |
| Rv0469  | 1280 | 181 | 2,822082208 | 0,822920426  | 9,8952782 | 4,36E-23  | 4,48E-22    | 1,02E-22   | TRUE |
| Rv0470A | 92   | 53  | 0,795641501 | -1,20352028  | -5,510797 | 3,57E-08  | 1,38E-07    | 3,14E-08   | TRUE |
| Rv0472c | 505  | 74  | 2,770686212 | 0,77152443   | 5,8783634 | 4,14E-09  | 1,77E-08    | 4,01E-09   | TRUE |
| Rv0474  | 303  | 41  | 2,885621979 | 0,886460197  | 5,1282757 | 2,92E-07  | 1,02E-06    | 2,32E-07   | TRUE |
| Rv0475  | 591  | 247 | 1,258647089 | -0,740514693 | -7,932827 | 2,14E-15  | 1,45E-14    | 3,30E-15   | TRUE |
| Rv0479c | 701  | 90  | 2,961417538 | 0,962255756  | 8,3573983 | 6,41E-17  | 4,67E-16    | 1,06E-16   | TRUE |
| Rv0482  | 113  | 48  | 1,235216462 | -0,76394532  | -3,592429 | 0,0003276 | 0,000783561 | 0,00017776 | TRUE |
| Rv0483  | 903  | 180 | 2,326729081 | 0,327567299  | 3,6046996 | 0,0003125 | 0,000749274 | 0,00017002 | TRUE |
| Rv0484c | 187  | 25  | 2,90303827  | 0,903876488  | 4,0954273 | 4,21E-05  | 0,000112944 | 2,56E-05   | TRUE |
| Rv0485  | 824  | 696 | 0,243557031 | -1,755604751 | -26,48366 | 1,50E-154 | 1,59E-152   | 3,62E-153  | TRUE |
| Rv0486  | 619  | 266 | 1,218513164 | -0,780648618 | -8,618423 | 6,79E-18  | 5,22E-17    | 1,18E-17   | TRUE |
| Rv0487  | 430  | 59  | 2,8655498   | 0,866388018  | 5,9918374 | 2,07E-09  | 9,16E-09    | 2,08E-09   | TRUE |
| Rv0489  | 271  | 34  | 2,9946862   | 0,995524418  | 5,3446048 | 9,06E-08  | 3,37E-07    | 7,64E-08   | TRUE |
| Rv0490  | 1410 | 191 | 2,884050619 | 0,884888837  | 11,048652 | 2,23E-28  | 2,85E-27    | 6,47E-28   | TRUE |
| Rv0492c | 44   | 32  | 0,459431619 | -1,539730163 | -5,168116 | 2,36E-07  | 8,38E-07    | 1,90E-07   | TRUE |
| Rv0493c | 53   | 4   | 3,727920455 | 1,728758673  | 3,6145114 | 0,0003009 | 0,000723663 | 0,00016421 | TRUE |
| Rv0495c | 358  | 58  | 2,625834782 | 0,626673     | 4,1222317 | 3,75E-05  | 0,000101257 | 2,30E-05   | TRUE |
| Rv0496  | 850  | 155 | 2,455194626 | 0,456032844  | 4,7615922 | 1,92E-06  | 6,12E-06    | 1,39E-06   | TRUE |
| Rv0497  | 376  | 39  | 3,269186633 | 1,270024851  | 7,6583153 | 1,88E-14  | 1,20E-13    | 2,73E-14   | TRUE |
| Rv0498  | 83   | 51  | 0,702614089 | -1,296547693 | -5,730526 | 1,00E-08  | 4,12E-08    | 9,35E-09   | TRUE |
| Rv0500A | 848  | 94  | 3,173331603 | 1,174169821  | 10,812101 | 3,02E-27  | 3,70E-26    | 8,38E-27   | TRUE |
| Rv0500B | 329  | 34  | 3,274480932 | 1,275319151  | 7,186901  | 6,63E-13  | 3,87E-12    | 8,77E-13   | TRUE |
| Rv0501  | 2015 | 381 | 2,402916936 | 0,403755154  | 6,551865  | 5,68E-11  | 2,86E-10    | 6,49E-11   | TRUE |
| Rv0502  | 2398 | 439 | 2,449538814 | 0,450377032  | 7,9093177 | 2,59E-15  | 1,75E-14    | 3,98E-15   | TRUE |
| Rv0503c | 1246 | 93  | 3,743929542 | 1,74476776   | 17,642115 | 1,17E-69  | 4,39E-68    | 9,97E-69   | TRUE |
| Rv0505c | 396  | 53  | 2,901436166 | 0,902274384  | 5,9510726 | 2,66E-09  | 1,17E-08    | 2,65E-09   | TRUE |

|         |      |      |              |              |           |           |             |            |      |
|---------|------|------|--------------|--------------|-----------|-----------|-------------|------------|------|
| Rv0506  | 443  | 44   | 3,33173127   | 1,332569488  | 8,6281266 | 6,24E-18  | 4,80E-17    | 1,09E-17   | TRUE |
| Rv0507  | 530  | 37   | 3,840395184  | 1,841233402  | 11,939631 | 7,35E-33  | 1,13E-31    | 2,56E-32   | TRUE |
| Rv0508  | 178  | 127  | 0,487048744  | -1,512113038 | -10,16027 | 2,98E-24  | 3,30E-23    | 7,50E-24   | TRUE |
| Rv0509  | 1869 | 1591 | 0,232332733  | -1,766829048 | -40,24146 | 0         | 0           | 0          | TRUE |
| Rv0510  | 2833 | 1162 | 1,285720533  | -0,713441249 | -16,66876 | 2,21E-62  | 7,45E-61    | 1,69E-61   | TRUE |
| Rv0511  | 2246 | 766  | 1,55194163   | -0,447220151 | -8,881512 | 6,60E-19  | 5,34E-18    | 1,21E-18   | TRUE |
| Rv0512  | 1122 | 378  | 1,569614536  | -0,429547245 | -6,008591 | 1,87E-09  | 8,29E-09    | 1,88E-09   | TRUE |
| Rv0514  | 95   | 41   | 1,212303604  | -0,786858178 | -3,406172 | 0,0006588 | 0,001487312 | 0,0003375  | TRUE |
| Rv0517  | 513  | 69   | 2,894290559  | 0,895128777  | 6,7282453 | 1,72E-11  | 9,04E-11    | 2,05E-11   | TRUE |
| Rv0518  | 303  | 43   | 2,816909229  | 0,817747447  | 4,7874378 | 1,69E-06  | 5,42E-06    | 1,23E-06   | TRUE |
| Rv0525  | 249  | 103  | 1,273501405  | -0,725660377 | -5,032227 | 4,85E-07  | 1,65E-06    | 3,74E-07   | TRUE |
| Rv0526  | 285  | 165  | 0,788495895  | -1,210665887 | -9,769861 | 1,52E-22  | 1,50E-21    | 3,41E-22   | TRUE |
| Rv0527  | 353  | 130  | 1,44115656   | -0,558005222 | -4,475576 | 7,62E-06  | 2,25E-05    | 5,10E-06   | TRUE |
| Rv0529  | 315  | 46   | 2,775646062  | 0,77648428   | 4,6682864 | 3,04E-06  | 9,48E-06    | 2,15E-06   | TRUE |
| Rv0530  | 589  | 86   | 2,775859069  | 0,776697287  | 6,3854152 | 1,71E-10  | 8,33E-10    | 1,89E-10   | TRUE |
| Rv0530A | 370  | 51   | 2,858956119  | 0,859794337  | 5,5220399 | 3,35E-08  | 1,31E-07    | 2,97E-08   | TRUE |
| Rv0537c | 276  | 37   | 2,899071091  | 0,899909309  | 4,957119  | 7,15E-07  | 2,37E-06    | 5,37E-07   | TRUE |
| Rv0542c | 358  | 58   | 2,625834782  | 0,626673     | 4,1222317 | 3,75E-05  | 0,000101257 | 2,30E-05   | TRUE |
| Rv0544c | 229  | 20   | 3,517275693  | 1,518113911  | 6,8432953 | 7,74E-12  | 4,17E-11    | 9,46E-12   | TRUE |
| Rv0545c | 1075 | 409  | 1,394163912  | -0,60499787  | -8,539458 | 1,35E-17  | 1,02E-16    | 2,32E-17   | TRUE |
| Rv0546c | 159  | 13   | 3,612443237  | 1,613281455  | 5,9605215 | 2,51E-09  | 1,10E-08    | 2,51E-09   | TRUE |
| Rv0547c | 166  | 22   | 2,915607813  | 0,916446031  | 3,903753  | 9,47E-05  | 0,00024092  | 5,47E-05   | TRUE |
| Rv0549c | 83   | 9    | 3,20511443   | 1,205952648  | 3,4545769 | 0,0005512 | 0,001261981 | 0,00028628 | TRUE |
| Rv0552  | 114  | 53   | 1,10496956   | -0,894192222 | -4,319894 | 1,56E-05  | 4,45E-05    | 1,01E-05   | TRUE |
| Rv0554  | 87   | 93   | -0,096215315 | -2,095377097 | -10,88962 | 1,29E-27  | 1,62E-26    | 3,67E-27   | TRUE |
| Rv0558  | 555  | 97   | 2,516431119  | 0,517269337  | 4,3178602 | 1,58E-05  | 4,48E-05    | 1,02E-05   | TRUE |
| Rv0559c | 356  | 44   | 3,016301812  | 1,01714003   | 6,2354147 | 4,51E-10  | 2,11E-09    | 4,78E-10   | TRUE |
| Rv0560c | 93   | 44   | 1,079727192  | -0,919434589 | -4,029474 | 5,59E-05  | 0,000146789 | 3,33E-05   | TRUE |
| Rv0562  | 578  | 105  | 2,460680165  | 0,461518383  | 3,9696986 | 7,20E-05  | 0,000186727 | 4,24E-05   | TRUE |
| Rv0563  | 969  | 149  | 2,701184335  | 0,702022553  | 7,499827  | 6,39E-14  | 3,93E-13    | 8,91E-14   | TRUE |
| Rv0564c | 114  | 10   | 3,510961919  | 1,511800137  | 4,8134522 | 1,48E-06  | 4,82E-06    | 1,09E-06   | TRUE |
| Rv0565c | 136  | 5    | 4,765534746  | 2,766372964  | 7,7405551 | 9,90E-15  | 6,42E-14    | 1,46E-14   | TRUE |
| Rv0567  | 554  | 70   | 2,984459149  | 0,985297367  | 7,5769802 | 3,54E-14  | 2,22E-13    | 5,05E-14   | TRUE |
| Rv0568  | 733  | 130  | 2,495301575  | 0,496139793  | 4,7771704 | 1,78E-06  | 5,70E-06    | 1,29E-06   | TRUE |
| Rv0569  | 910  | 807  | 0,173297872  | -1,82586391  | -29,30145 | 9,94E-189 | 1,57E-186   | 3,56E-187  | TRUE |
| Rv0570  | 596  | 233  | 1,354982376  | -0,644179406 | -6,815194 | 9,41E-12  | 5,03E-11    | 1,14E-11   | TRUE |
| Rv0572c | 209  | 11   | 4,247927513  | 2,248765732  | 8,5323483 | 1,43E-17  | 1,08E-16    | 2,46E-17   | TRUE |

|         |      |     |              |              |           |           |             |            |      |
|---------|------|-----|--------------|--------------|-----------|-----------|-------------|------------|------|
| Rv0577  | 476  | 57  | 3,061927749  | 1,062765967  | 7,4744099 | 7,76E-14  | 4,75E-13    | 1,08E-13   | TRUE |
| Rv0578c | 703  | 336 | 1,065063456  | -0,934098326 | -11,28666 | 1,53E-29  | 2,06E-28    | 4,68E-29   | TRUE |
| Rv0581  | 82   | 9   | 3,187627003  | 1,188465221  | 3,3941809 | 0,0006883 | 0,001543828 | 0,00035022 | TRUE |
| Rv0582  | 84   | 9   | 3,222392421  | 1,223230639  | 3,5145789 | 0,0004405 | 0,001026983 | 0,00023297 | TRUE |
| Rv0584  | 135  | 17  | 2,989352756  | 0,990190974  | 3,7553831 | 0,0001731 | 0,000426101 | 9,67E-05   | TRUE |
| Rv0586  | 409  | 52  | 2,975517315  | 0,976355533  | 6,4610597 | 1,04E-10  | 5,12E-10    | 1,16E-10   | TRUE |
| Rv0588  | 486  | 62  | 2,970616193  | 0,971454411  | 7,0137528 | 2,32E-12  | 1,30E-11    | 2,96E-12   | TRUE |
| Rv0589  | 308  | 30  | 3,359895945  | 1,360734163  | 7,3104304 | 2,66E-13  | 1,59E-12    | 3,61E-13   | TRUE |
| Rv0590  | 188  | 13  | 3,854149134  | 1,854987352  | 7,1467114 | 8,89E-13  | 5,15E-12    | 1,17E-12   | TRUE |
| Rv0594  | 99   | 6   | 4,044394119  | 2,045232337  | 5,5325199 | 3,16E-08  | 1,24E-07    | 2,81E-08   | TRUE |
| Rv0597c | 267  | 44  | 2,601264313  | 0,602102531  | 3,4349164 | 0,0005927 | 0,001349742 | 0,00030628 | TRUE |
| Rv0599c | 280  | 23  | 3,605721061  | 1,606559279  | 7,8861661 | 3,12E-15  | 2,10E-14    | 4,76E-15   | TRUE |
| Rv0605  | 447  | 256 | 0,804131021  | -1,195030761 | -12,04559 | 2,05E-33  | 3,20E-32    | 7,27E-33   | TRUE |
| Rv0608  | 339  | 31  | 3,450945153  | 1,451783371  | 8,0546269 | 7,97E-16  | 5,53E-15    | 1,25E-15   | TRUE |
| Rv0613c | 606  | 257 | 1,237549434  | -0,761612348 | -8,292047 | 1,11E-16  | 7,98E-16    | 1,81E-16   | TRUE |
| Rv0615  | 136  | 18  | 2,91753784   | 0,918376058  | 3,5396751 | 0,0004006 | 0,000941063 | 0,00021355 | TRUE |
| Rv0617  | 66   | 36  | 0,874469118  | -1,124692664 | -4,302643 | 1,69E-05  | 4,77E-05    | 1,08E-05   | TRUE |
| Rv0627  | 86   | 9   | 3,256339753  | 1,257177971  | 3,6334282 | 0,0002797 | 0,00067548  | 0,00015328 | TRUE |
| Rv0628c | 188  | 79  | 1,250808104  | -0,748353678 | -4,527008 | 5,98E-06  | 1,79E-05    | 4,06E-06   | TRUE |
| Rv0629c | 189  | 256 | -0,437757576 | -2,436919358 | -19,80611 | 2,64E-87  | 1,35E-85    | 3,06E-86   | TRUE |
| Rv0630c | 111  | 50  | 1,150559677  | -0,848602105 | -4,013503 | 5,98E-05  | 0,000156671 | 3,56E-05   | TRUE |
| Rv0632c | 885  | 140 | 2,660250628  | 0,661088846  | 6,7974078 | 1,07E-11  | 5,65E-11    | 1,28E-11   | TRUE |
| Rv0633c | 187  | 22  | 3,087462841  | 1,088301059  | 4,7759392 | 1,79E-06  | 5,72E-06    | 1,30E-06   | TRUE |
| Rv0634B | 1816 | 56  | 5,019193565  | 3,020031783  | 29,555946 | 5,51E-192 | 9,05E-190   | 2,05E-190  | TRUE |
| Rv0635  | 1091 | 99  | 3,462078766  | 1,462916984  | 14,534313 | 7,34E-48  | 1,73E-46    | 3,94E-47   | TRUE |
| Rv0636  | 1517 | 219 | 2,792218311  | 0,793056529  | 10,435984 | 1,70E-25  | 1,96E-24    | 4,46E-25   | TRUE |
| Rv0637  | 902  | 98  | 3,202273779  | 1,203111997  | 11,368841 | 5,98E-30  | 8,27E-29    | 1,88E-29   | TRUE |
| Rv0638  | 1129 | 497 | 1,183727729  | -0,815434053 | -12,23394 | 2,05E-34  | 3,32E-33    | 7,54E-34   | TRUE |
| Rv0640  | 1112 | 133 | 3,063658637  | 1,064496855  | 11,440824 | 2,61E-30  | 3,67E-29    | 8,33E-30   | TRUE |
| Rv0642c | 944  | 167 | 2,498938757  | 0,499776975  | 5,4578966 | 4,82E-08  | 1,84E-07    | 4,17E-08   | TRUE |
| Rv0643c | 608  | 99  | 2,618570893  | 0,619409111  | 5,3168116 | 1,06E-07  | 3,88E-07    | 8,80E-08   | TRUE |
| Rv0644c | 544  | 45  | 3,595609745  | 1,596447963  | 10,942697 | 7,20E-28  | 9,05E-27    | 2,05E-27   | TRUE |
| Rv0645c | 368  | 52  | 2,823122238  | 0,823960456  | 5,3104507 | 1,09E-07  | 4,00E-07    | 9,09E-08   | TRUE |
| Rv0651  | 338  | 57  | 2,567989422  | 0,56882764   | 3,6723234 | 0,0002404 | 0,00058408  | 0,00013254 | TRUE |
| Rv0652  | 207  | 156 | 0,408084739  | -1,591077043 | -11,68793 | 1,47E-31  | 2,14E-30    | 4,85E-31   | TRUE |
| Rv0655  | 3866 | 776 | 2,31671308   | 0,317551298  | 7,248631  | 4,21E-13  | 2,47E-12    | 5,62E-13   | TRUE |
| Rv0659c | 1574 | 143 | 3,460348489  | 1,461186707  | 17,443644 | 3,85E-68  | 1,41E-66    | 3,19E-67   | TRUE |

|         |      |      |              |              |           |           |             |           |      |
|---------|------|------|--------------|--------------|-----------|-----------|-------------|-----------|------|
| Rv0660c | 616  | 88   | 2,807354922  | 0,80819314   | 6,7579794 | 1,40E-11  | 7,39E-11    | 1,68E-11  | TRUE |
| Rv0661c | 2    | 11   | -2,459431619 | -4,458593401 | -5,290934 | 1,22E-07  | 4,44E-07    | 1,01E-07  | TRUE |
| Rv0663  | 475  | 67   | 2,825694513  | 0,826532731  | 6,0495686 | 1,45E-09  | 6,52E-09    | 1,48E-09  | TRUE |
| Rv0664  | 99   | 7    | 3,822001698  | 1,822839916  | 5,1246717 | 2,98E-07  | 1,04E-06    | 2,36E-07  | TRUE |
| Rv0665  | 78   | 2    | 5,285402219  | 3,286240437  | 6,3637225 | 1,97E-10  | 9,48E-10    | 2,15E-10  | TRUE |
| Rv0667  | 8551 | 1922 | 2,15348481   | 0,154323028  | 5,3965615 | 6,79E-08  | 2,55E-07    | 5,79E-08  | TRUE |
| Rv0668  | 5144 | 1701 | 1,596507502  | -0,40265428  | -12,01994 | 2,79E-33  | 4,35E-32    | 9,88E-33  | TRUE |
| Rv0669c | 289  | 26   | 3,474485964  | 1,475324182  | 7,5266993 | 5,20E-14  | 3,22E-13    | 7,30E-14  | TRUE |
| Rv0670  | 411  | 64   | 2,682994584  | 0,683832802  | 4,7722542 | 1,82E-06  | 5,82E-06    | 1,32E-06  | TRUE |
| Rv0672  | 523  | 249  | 1,070665204  | -0,928496578 | -9,666594 | 4,18E-22  | 4,04E-21    | 9,17E-22  | TRUE |
| Rv0673  | 103  | 54   | 0,931613025  | -1,067548757 | -5,051749 | 4,38E-07  | 1,49E-06    | 3,39E-07  | TRUE |
| Rv0675  | 53   | 27   | 0,973032952  | -1,026128829 | -3,45819  | 0,0005438 | 0,001246261 | 0,0002828 | TRUE |
| Rv0677c | 100  | 65   | 0,621488377  | -1,377673405 | -6,778325 | 1,22E-11  | 6,44E-11    | 1,46E-11  | TRUE |
| Rv0678  | 218  | 79   | 1,464403577  | -0,534758205 | -3,356903 | 0,0007882 | 0,001750389 | 0,0003972 | TRUE |
| Rv0679c | 83   | 40   | 1,053111336  | -0,946050445 | -3,934965 | 8,32E-05  | 0,000213935 | 4,85E-05  | TRUE |
| Rv0681  | 125  | 58   | 1,10780329   | -0,891358492 | -4,506982 | 6,58E-06  | 1,96E-05    | 4,44E-06  | TRUE |
| Rv0682  | 1057 | 366  | 1,530059823  | -0,469101959 | -6,412679 | 1,43E-10  | 7,00E-10    | 1,59E-10  | TRUE |
| Rv0683  | 1244 | 222  | 2,486354904  | 0,487193122  | 6,1214397 | 9,27E-10  | 4,22E-09    | 9,58E-10  | TRUE |
| Rv0684  | 6412 | 1367 | 2,229761183  | 0,230599401  | 6,8868077 | 5,71E-12  | 3,10E-11    | 7,03E-12  | TRUE |
| Rv0685  | 5206 | 824  | 2,659459069  | 0,660297287  | 16,485175 | 4,69E-61  | 1,53E-59    | 3,47E-60  | TRUE |
| Rv0686  | 377  | 34   | 3,470957872  | 1,47179609   | 8,58141   | 9,37E-18  | 7,16E-17    | 1,63E-17  | TRUE |
| Rv0687  | 231  | 21   | 3,459431619  | 1,460269837  | 6,6778395 | 2,42E-11  | 1,26E-10    | 2,86E-11  | TRUE |
| Rv0688  | 382  | 44   | 3,117997209  | 1,118835428  | 6,9808012 | 2,94E-12  | 1,64E-11    | 3,72E-12  | TRUE |
| Rv0691A | 327  | 341  | -0,060481104 | -2,059642885 | -20,62665 | 1,58E-94  | 8,92E-93    | 2,02E-93  | TRUE |
| Rv0692  | 375  | 496  | -0,403449525 | -2,402611307 | -27,34622 | 1,20E-164 | 1,43E-162   | 3,25E-163 | TRUE |
| Rv0693  | 1023 | 1996 | -0,964305576 | -2,963467357 | -61,43197 | 0         | 0           | 0         | TRUE |
| Rv0694  | 1083 | 480  | 1,173926932  | -0,82523485  | -12,14655 | 5,98E-34  | 9,44E-33    | 2,14E-33  | TRUE |
| Rv0695  | 153  | 78   | 0,971985624  | -1,027176158 | -5,882967 | 4,03E-09  | 1,72E-08    | 3,91E-09  | TRUE |
| Rv0696  | 620  | 423  | 0,551610552  | -1,44755123  | -17,95447 | 4,43E-72  | 1,71E-70    | 3,88E-71  | TRUE |
| Rv0697  | 224  | 257  | -0,198269627 | -2,197431409 | -18,65298 | 1,19E-77  | 5,23E-76    | 1,19E-76  | TRUE |
| Rv0700  | 2479 | 317  | 2,967203526  | 0,968041744  | 15,800741 | 3,07E-56  | 9,19E-55    | 2,08E-55  | TRUE |
| Rv0701  | 2508 | 544  | 2,204858792  | 0,20569701   | 3,8546017 | 0,0001159 | 0,000291198 | 6,61E-05  | TRUE |
| Rv0703  | 1968 | 317  | 2,634175475  | 0,635013693  | 9,7831659 | 1,33E-22  | 1,33E-21    | 3,01E-22  | TRUE |
| Rv0704  | 2973 | 391  | 2,926678951  | 0,927517169  | 16,697917 | 1,36E-62  | 4,65E-61    | 1,06E-61  | TRUE |
| Rv0705  | 1403 | 199  | 2,817674673  | 0,818512891  | 10,312478 | 6,19E-25  | 7,03E-24    | 1,60E-24  | TRUE |
| Rv0707  | 2310 | 340  | 2,7642862    | 0,765124418  | 12,486886 | 8,80E-36  | 1,48E-34    | 3,37E-35  | TRUE |
| Rv0708  | 2088 | 278  | 2,908964924  | 0,909803142  | 13,766055 | 4,08E-43  | 8,56E-42    | 1,94E-42  | TRUE |



|         |      |     |             |              |           |           |             |            |      |
|---------|------|-----|-------------|--------------|-----------|-----------|-------------|------------|------|
| Rv0709  | 2002 | 412 | 2,280725732 | 0,28156395   | 4,6518129 | 3,29E-06  | 1,02E-05    | 2,32E-06   | TRUE |
| Rv0710  | 1586 | 307 | 2,36908221  | 0,369920428  | 5,3563741 | 8,49E-08  | 3,17E-07    | 7,19E-08   | TRUE |
| Rv0713  | 369  | 22  | 4,068045387 | 2,068883606  | 10,760897 | 5,27E-27  | 6,41E-26    | 1,45E-26   | TRUE |
| Rv0714  | 1337 | 83  | 4,009744319 | 2,010582537  | 20,111072 | 5,90E-90  | 3,15E-88    | 7,14E-89   | TRUE |
| Rv0715  | 981  | 104 | 3,237669608 | 1,238507826  | 12,130588 | 7,27E-34  | 1,14E-32    | 2,59E-33   | TRUE |
| Rv0716  | 713  | 225 | 1,663977075 | -0,335184707 | -3,676461 | 0,0002365 | 0,000575045 | 0,00013049 | TRUE |
| Rv0717  | 1338 | 203 | 2,720526483 | 0,721364702  | 9,0261163 | 1,78E-19  | 1,51E-18    | 3,42E-19   | TRUE |
| Rv0719  | 1853 | 362 | 2,355801279 | 0,356639497  | 5,5951016 | 2,20E-08  | 8,78E-08    | 1,99E-08   | TRUE |
| Rv0721  | 2405 | 786 | 1,613435676 | -0,385726105 | -7,843053 | 4,40E-15  | 2,92E-14    | 6,62E-15   | TRUE |
| Rv0722  | 1218 | 148 | 3,040845052 | 1,04168327   | 11,763777 | 6,00E-32  | 8,86E-31    | 2,01E-31   | TRUE |
| Rv0723  | 2461 | 325 | 2,920733035 | 0,921571253  | 15,108768 | 1,42E-51  | 3,83E-50    | 8,69E-51   | TRUE |
| Rv0724  | 1677 | 543 | 1,626858586 | -0,372303196 | -6,305164 | 2,88E-10  | 1,37E-09    | 3,10E-10   | TRUE |
| Rv0726c | 235  | 33  | 2,832122827 | 0,832961045  | 4,2832142 | 1,84E-05  | 5,17E-05    | 1,17E-05   | TRUE |
| Rv0730  | 363  | 122 | 1,5730884   | -0,426073381 | -3,387125 | 0,0007063 | 0,001579145 | 0,00035834 | TRUE |
| Rv0731c | 50   | 0   | 6,64385619  | 4,644694408  | 5,6907699 | 1,26E-08  | 5,16E-08    | 1,17E-08   | TRUE |
| Rv0732  | 1278 | 169 | 2,918792685 | 0,919630903  | 10,865803 | 1,68E-27  | 2,09E-26    | 4,74E-27   | TRUE |
| Rv0733  | 934  | 165 | 2,500956525 | 0,501794744  | 5,44891   | 5,07E-08  | 1,92E-07    | 4,37E-08   | TRUE |
| Rv0749  | 93   | 6   | 3,95419631  | 1,955034529  | 5,2065077 | 1,92E-07  | 6,86E-07    | 1,56E-07   | TRUE |
| Rv0751c | 104  | 44  | 1,2410081   | -0,758153682 | -3,416829 | 0,0006335 | 0,001435221 | 0,00032568 | TRUE |
| Rv0752c | 258  | 42  | 2,618909833 | 0,619748051  | 3,4648631 | 0,0005305 | 0,001219999 | 0,00027645 | TRUE |
| Rv0755c | 628  | 98  | 2,679910905 | 0,680749123  | 5,8758837 | 4,21E-09  | 1,79E-08    | 4,07E-09   | TRUE |
| Rv0757  | 835  | 118 | 2,822989338 | 0,823827556  | 7,9989793 | 1,25E-15  | 8,65E-15    | 1,96E-15   | TRUE |
| Rv0758  | 538  | 98  | 2,456752518 | 0,457590737  | 3,7998318 | 0,0001448 | 0,000359163 | 8,15E-05   | TRUE |
| Rv0759c | 227  | 36  | 2,656623486 | 0,657461704  | 3,4253329 | 0,000614  | 0,00139585  | 0,00031675 | TRUE |
| Rv0761c | 749  | 246 | 1,606307403 | -0,392854379 | -4,460883 | 8,16E-06  | 2,39E-05    | 5,43E-06   | TRUE |
| Rv0762c | 69   | 5   | 3,786596362 | 1,78743458   | 4,221018  | 2,43E-05  | 6,75E-05    | 1,53E-05   | TRUE |
| Rv0764c | 176  | 82  | 1,101879614 | -0,897282168 | -5,389126 | 7,08E-08  | 2,66E-07    | 6,03E-08   | TRUE |
| Rv0766c | 80   | 3   | 4,736965594 | 2,737803812  | 5,9045477 | 3,54E-09  | 1,52E-08    | 3,45E-09   | TRUE |
| Rv0768  | 60   | 31  | 0,952694285 | -1,046467497 | -3,765671 | 0,0001661 | 0,000409186 | 9,29E-05   | TRUE |
| Rv0775  | 157  | 75  | 1,065802058 | -0,933359723 | -5,327753 | 9,94E-08  | 3,67E-07    | 8,32E-08   | TRUE |
| Rv0778  | 446  | 64  | 2,8008999   | 0,801738118  | 5,7105919 | 1,13E-08  | 4,63E-08    | 1,05E-08   | TRUE |
| Rv0781  | 349  | 31  | 3,492886916 | 1,493725134  | 8,3477822 | 6,96E-17  | 5,03E-16    | 1,14E-16   | TRUE |
| Rv0783c | 305  | 36  | 3,082740431 | 1,083578649  | 6,0780582 | 1,22E-09  | 5,51E-09    | 1,25E-09   | TRUE |
| Rv0788  | 408  | 55  | 2,891065628 | 0,891903847  | 5,9818958 | 2,21E-09  | 9,73E-09    | 2,21E-09   | TRUE |
| Rv0789c | 49   | 0   | 6,614709844 | 4,615548062  | 5,6265692 | 1,84E-08  | 7,36E-08    | 1,67E-08   | TRUE |
| Rv0792c | 93   | 7   | 3,731803889 | 1,732642107  | 4,7955466 | 1,62E-06  | 5,24E-06    | 1,19E-06   | TRUE |
| Rv0794c | 121  | 83  | 0,543823806 | -1,455337976 | -7,983299 | 1,42E-15  | 9,79E-15    | 2,22E-15   | TRUE |

|         |      |     |              |              |           |           |             |            |      |
|---------|------|-----|--------------|--------------|-----------|-----------|-------------|------------|------|
| Rv0798c | 250  | 26  | 3,265344567  | 1,266182785  | 6,2297775 | 4,67E-10  | 2,18E-09    | 4,95E-10   | TRUE |
| Rv0799c | 355  | 17  | 4,384212373  | 2,385050591  | 11,518979 | 1,06E-30  | 1,51E-29    | 3,43E-30   | TRUE |
| Rv0802c | 72   | 0   | 7,169925001  | 5,17076322   | 6,9399989 | 3,92E-12  | 2,16E-11    | 4,90E-12   | TRUE |
| Rv0803  | 533  | 190 | 1,488136114  | -0,511025667 | -4,995974 | 5,85E-07  | 1,96E-06    | 4,44E-07   | TRUE |
| Rv0804  | 100  | 74  | 0,434402824  | -1,564758958 | -7,952515 | 1,83E-15  | 1,24E-14    | 2,82E-15   | TRUE |
| Rv0805  | 1192 | 166 | 2,844129089  | 0,844967307  | 9,7673081 | 1,56E-22  | 1,53E-21    | 3,48E-22   | TRUE |
| Rv0807  | 14   | 15  | -0,099535674 | -2,098697455 | -4,377598 | 1,20E-05  | 3,47E-05    | 7,86E-06   | TRUE |
| Rv0808  | 1102 | 887 | 0,313118214  | -1,686043568 | -29,06499 | 9,95E-186 | 1,51E-183   | 3,43E-184  | TRUE |
| Rv0809  | 640  | 339 | 0,916786632  | -1,08237515  | -12,80315 | 1,57E-37  | 2,76E-36    | 6,26E-37   | TRUE |
| Rv0810c | 439  | 55  | 2,996717416  | 0,997555634  | 6,81413   | 9,48E-12  | 5,05E-11    | 1,15E-11   | TRUE |
| Rv0820  | 288  | 43  | 2,743660247  | 0,744498465  | 4,3036258 | 1,68E-05  | 4,75E-05    | 1,08E-05   | TRUE |
| Rv0822c | 470  | 86  | 2,450252192  | 0,45109041   | 3,5050207 | 0,0004566 | 0,001062998 | 0,00024121 | TRUE |
| Rv0831c | 944  | 93  | 3,343484238  | 1,344322456  | 12,68145  | 7,49E-37  | 1,31E-35    | 2,97E-36   | TRUE |
| Rv0838  | 134  | 13  | 3,365649472  | 1,36648769   | 4,8373312 | 1,32E-06  | 4,29E-06    | 9,73E-07   | TRUE |
| Rv0839  | 239  | 30  | 2,993976212  | 0,99481443   | 5,0161518 | 5,27E-07  | 1,77E-06    | 4,03E-07   | TRUE |
| Rv0840c | 67   | 5   | 3,744161096  | 1,744999314  | 4,0906156 | 4,30E-05  | 0,000115117 | 2,61E-05   | TRUE |
| Rv0842  | 110  | 11  | 3,321928095  | 1,322766313  | 4,2747999 | 1,91E-05  | 5,36E-05    | 1,22E-05   | TRUE |
| Rv0845  | 198  | 15  | 3,722466024  | 1,723304243  | 6,9709557 | 3,15E-12  | 1,75E-11    | 3,97E-12   | TRUE |
| Rv0847  | 309  | 106 | 1,543542573  | -0,455619209 | -3,358853 | 0,0007827 | 0,001739064 | 0,00039463 | TRUE |
| Rv0849  | 289  | 49  | 2,560215838  | 0,561054057  | 3,3537878 | 0,0007971 | 0,001768223 | 0,00040124 | TRUE |
| Rv0850  | 28   | 19  | 0,559427409  | -1,439734373 | -3,78873  | 0,0001514 | 0,000375124 | 8,51E-05   | TRUE |
| Rv0857  | 151  | 21  | 2,846087317  | 0,846925535  | 3,4824589 | 0,0004968 | 0,001151972 | 0,0002614  | TRUE |
| Rv0860  | 2561 | 949 | 1,432227261  | -0,566934521 | -12,27636 | 1,21E-34  | 1,99E-33    | 4,51E-34   | TRUE |
| Rv0862c | 216  | 29  | 2,896906507  | 0,897744725  | 4,3763618 | 1,21E-05  | 3,48E-05    | 7,90E-06   | TRUE |
| Rv0863  | 387  | 45  | 3,10433666   | 1,105174878  | 6,957008  | 3,48E-12  | 1,92E-11    | 4,35E-12   | TRUE |
| Rv0864  | 808  | 120 | 2,751320887  | 0,752159105  | 7,2738339 | 3,49E-13  | 2,07E-12    | 4,69E-13   | TRUE |
| Rv0866  | 280  | 213 | 0,394573397  | -1,604588385 | -13,74158 | 5,72E-43  | 1,19E-41    | 2,69E-42   | TRUE |
| Rv0867c | 360  | 32  | 3,491853096  | 1,492691314  | 8,4739831 | 2,37E-17  | 1,76E-16    | 4,00E-17   | TRUE |
| Rv0869c | 134  | 98  | 0,451379346  | -1,547782436 | -9,079228 | 1,09E-19  | 9,38E-19    | 2,13E-19   | TRUE |
| Rv0872c | 939  | 284 | 1,725234228  | -0,273927554 | -3,411839 | 0,0006453 | 0,00145924  | 0,00033113 | TRUE |
| Rv0877  | 936  | 298 | 1,651196199  | -0,347965583 | -4,382976 | 1,17E-05  | 3,39E-05    | 7,69E-06   | TRUE |
| Rv0880  | 80   | 2   | 5,321928095  | 3,322766313  | 6,4753103 | 9,46E-11  | 4,68E-10    | 1,06E-10   | TRUE |
| Rv0883c | 360  | 56  | 2,684498174  | 0,685336392  | 4,4749642 | 7,64E-06  | 2,25E-05    | 5,12E-06   | TRUE |
| Rv0891c | 192  | 26  | 2,884522783  | 0,885361001  | 4,0778789 | 4,54E-05  | 0,000120787 | 2,74E-05   | TRUE |
| Rv0892  | 195  | 21  | 3,215012891  | 1,215851109  | 5,3295127 | 9,85E-08  | 3,64E-07    | 8,26E-08   | TRUE |
| Rv0894  | 32   | 1   | 5            | 3,000838218  | 3,9107416 | 9,20E-05  | 0,000234887 | 5,33E-05   | TRUE |
| Rv0896  | 2575 | 827 | 1,638613198  | -0,360548584 | -7,553137 | 4,25E-14  | 2,65E-13    | 6,01E-14   | TRUE |

|         |      |     |              |              |           |           |             |            |      |
|---------|------|-----|--------------|--------------|-----------|-----------|-------------|------------|------|
| Rv0901  | 104  | 11  | 3,2410081    | 1,241846318  | 3,9574045 | 7,58E-05  | 0,000195955 | 4,45E-05   | TRUE |
| Rv0902c | 183  | 12  | 3,930737338  | 1,931575556  | 7,245346  | 4,31E-13  | 2,53E-12    | 5,74E-13   | TRUE |
| Rv0903c | 788  | 88  | 3,162620201  | 1,163458419  | 10,346574 | 4,34E-25  | 4,97E-24    | 1,13E-24   | TRUE |
| Rv0908  | 507  | 85  | 2,576451001  | 0,577289219  | 4,5580566 | 5,16E-06  | 1,56E-05    | 3,54E-06   | TRUE |
| Rv0913c | 444  | 69  | 2,68589141   | 0,686729628  | 4,9786913 | 6,40E-07  | 2,13E-06    | 4,82E-07   | TRUE |
| Rv0914c | 290  | 101 | 1,521697607  | -0,477464175 | -3,422875 | 0,0006196 | 0,001405291 | 0,00031889 | TRUE |
| Rv0917  | 268  | 27  | 3,311201688  | 1,312039906  | 6,6308711 | 3,34E-11  | 1,71E-10    | 3,88E-11   | TRUE |
| Rv0919  | 67   | 1   | 6,06608919   | 4,066927409  | 6,375508  | 1,82E-10  | 8,84E-10    | 2,00E-10   | TRUE |
| Rv0920c | 166  | 24  | 2,790076931  | 0,790915149  | 3,4431278 | 0,000575  | 0,001312447 | 0,00029782 | TRUE |
| Rv0923c | 107  | 12  | 3,156504486  | 1,157342704  | 3,796119  | 0,000147  | 0,000364353 | 8,27E-05   | TRUE |
| Rv0925c | 155  | 14  | 3,468769483  | 1,469607701  | 5,4961127 | 3,88E-08  | 1,50E-07    | 3,39E-08   | TRUE |
| Rv0928  | 300  | 21  | 3,836501268  | 1,837339486  | 8,9695782 | 2,98E-19  | 2,47E-18    | 5,61E-19   | TRUE |
| Rv0930  | 113  | 12  | 3,235216462  | 1,23605468   | 4,1099775 | 3,96E-05  | 0,000106455 | 2,42E-05   | TRUE |
| Rv0932c | 2537 | 504 | 2,331627881  | 0,332466099  | 6,1297916 | 8,80E-10  | 4,03E-09    | 9,14E-10   | TRUE |
| Rv0933  | 469  | 67  | 2,807354922  | 0,80819314   | 5,8965642 | 3,71E-09  | 1,60E-08    | 3,62E-09   | TRUE |
| Rv0935  | 1094 | 399 | 1,455152087  | -0,544009695 | -7,664734 | 1,79E-14  | 1,15E-13    | 2,60E-14   | TRUE |
| Rv0936  | 592  | 224 | 1,402098444  | -0,597063338 | -6,244268 | 4,26E-10  | 2,00E-09    | 4,53E-10   | TRUE |
| Rv0937c | 244  | 36  | 2,760812336  | 0,761650554  | 4,0404516 | 5,33E-05  | 0,000140458 | 3,19E-05   | TRUE |
| Rv0939  | 967  | 325 | 1,573076172  | -0,42608561  | -5,529581 | 3,21E-08  | 1,25E-07    | 2,85E-08   | TRUE |
| Rv0941c | 170  | 14  | 3,602036014  | 1,602874232  | 6,1345613 | 8,54E-10  | 3,91E-09    | 8,88E-10   | TRUE |
| Rv0943c | 6    | 8   | -0,415037499 | -2,414199281 | -3,481872 | 0,0004979 | 0,001153821 | 0,00026182 | TRUE |
| Rv0948c | 155  | 19  | 3,028196892  | 1,02903511   | 4,1537726 | 3,27E-05  | 8,93E-05    | 2,03E-05   | TRUE |
| Rv0950c | 850  | 70  | 3,602036014  | 1,602874232  | 13,718838 | 7,83E-43  | 1,62E-41    | 3,67E-42   | TRUE |
| Rv0951  | 1647 | 138 | 3,577100383  | 1,577938601  | 18,883398 | 1,56E-79  | 7,16E-78    | 1,63E-78   | TRUE |
| Rv0952  | 585  | 93  | 2,653134003  | 0,653972221  | 5,473372  | 4,42E-08  | 1,69E-07    | 3,84E-08   | TRUE |
| Rv0954  | 1570 | 284 | 2,466801724  | 0,467639942  | 6,6238544 | 3,50E-11  | 1,79E-10    | 4,06E-11   | TRUE |
| Rv0955  | 693  | 253 | 1,453717967  | -0,545443814 | -6,117103 | 9,53E-10  | 4,33E-09    | 9,83E-10   | TRUE |
| Rv0958  | 350  | 119 | 1,556393349  | -0,442768433 | -3,466244 | 0,0005278 | 0,001216589 | 0,00027598 | TRUE |
| Rv0959  | 233  | 92  | 1,340624189  | -0,658537593 | -4,366473 | 1,26E-05  | 3,64E-05    | 8,25E-06   | TRUE |
| Rv0960  | 66   | 34  | 0,956931278  | -1,042230504 | -3,930601 | 8,47E-05  | 0,000217289 | 4,93E-05   | TRUE |
| Rv0966c | 294  | 23  | 3,676110389  | 1,676948607  | 8,332719  | 7,90E-17  | 5,69E-16    | 1,29E-16   | TRUE |
| Rv0968  | 467  | 165 | 1,500956525  | -0,498205256 | -4,548891 | 5,39E-06  | 1,62E-05    | 3,68E-06   | TRUE |
| Rv0969  | 490  | 216 | 1,181750437  | -0,817411345 | -8,080014 | 6,48E-16  | 4,53E-15    | 1,03E-15   | TRUE |
| Rv0970  | 335  | 51  | 2,715591943  | 0,716430161  | 4,4883625 | 7,18E-06  | 2,13E-05    | 4,82E-06   | TRUE |
| Rv0971c | 34   | 21  | 0,695145418  | -1,304016363 | -3,693532 | 0,0002212 | 0,000540097 | 0,00012256 | TRUE |
| Rv0972c | 138  | 59  | 1,225881407  | -0,773280374 | -4,025038 | 5,70E-05  | 0,000149385 | 3,39E-05   | TRUE |
| Rv0973c | 98   | 46  | 1,091147888  | -0,908013894 | -4,076927 | 4,56E-05  | 0,00012112  | 2,75E-05   | TRUE |

|         |      |     |              |              |           |           |             |            |      |
|---------|------|-----|--------------|--------------|-----------|-----------|-------------|------------|------|
| Rv0981  | 395  | 275 | 0,522421035  | -1,476740747 | -14,69254 | 7,20E-49  | 1,77E-47    | 4,03E-48   | TRUE |
| Rv0983  | 1391 | 266 | 2,386624269  | 0,387462487  | 5,2379536 | 1,62E-07  | 5,85E-07    | 1,33E-07   | TRUE |
| Rv0985c | 69   | 1   | 6,108524457  | 4,109362675  | 6,4895779 | 8,61E-11  | 4,27E-10    | 9,69E-11   | TRUE |
| Rv0987  | 357  | 41  | 3,122228259  | 1,123066478  | 6,7690289 | 1,30E-11  | 6,85E-11    | 1,56E-11   | TRUE |
| Rv0989c | 106  | 0   | 7,727920455  | 5,728758673  | 8,4695228 | 2,46E-17  | 1,83E-16    | 4,15E-17   | TRUE |
| Rv0990c | 67   | 1   | 6,06608919   | 4,066927409  | 6,375508  | 1,82E-10  | 8,84E-10    | 2,00E-10   | TRUE |
| Rv0991c | 250  | 11  | 4,506352666  | 2,507190884  | 9,948585  | 2,56E-23  | 2,67E-22    | 6,06E-23   | TRUE |
| Rv0994  | 866  | 494 | 0,809855983  | -1,189305799 | -16,67232 | 2,08E-62  | 7,08E-61    | 1,61E-61   | TRUE |
| Rv0995  | 223  | 121 | 0,882036663  | -1,117125119 | -7,845906 | 4,30E-15  | 2,86E-14    | 6,50E-15   | TRUE |
| Rv0996  | 1420 | 145 | 3,291766124  | 1,292604342  | 15,091098 | 1,85E-51  | 4,97E-50    | 1,13E-50   | TRUE |
| Rv1001  | 284  | 36  | 2,979822118  | 0,980660336  | 5,4035196 | 6,53E-08  | 2,46E-07    | 5,58E-08   | TRUE |
| Rv1006  | 1430 | 689 | 1,053439259  | -0,945722523 | -16,33535 | 5,53E-60  | 1,77E-58    | 4,02E-59   | TRUE |
| Rv1007c | 371  | 56  | 2,727920455  | 0,728758673  | 4,7944401 | 1,63E-06  | 5,26E-06    | 1,19E-06   | TRUE |
| Rv1010  | 338  | 48  | 2,815916936  | 0,816755154  | 5,0511568 | 4,39E-07  | 1,50E-06    | 3,40E-07   | TRUE |
| Rv1011  | 103  | 7   | 3,879145605  | 1,879983823  | 5,3379226 | 9,40E-08  | 3,49E-07    | 7,91E-08   | TRUE |
| Rv1013  | 377  | 220 | 0,777061     | -1,222100782 | -11,36574 | 6,19E-30  | 8,54E-29    | 1,94E-29   | TRUE |
| Rv1014c | 84   | 6   | 3,807354922  | 1,80819314   | 4,6944605 | 2,67E-06  | 8,37E-06    | 1,90E-06   | TRUE |
| Rv1015c | 510  | 34  | 3,906890596  | 1,907728814  | 11,996083 | 3,73E-33  | 5,78E-32    | 1,31E-32   | TRUE |
| Rv1016c | 290  | 35  | 3,050626073  | 1,051464291  | 5,7831421 | 7,33E-09  | 3,07E-08    | 6,97E-09   | TRUE |
| Rv1017c | 701  | 63  | 3,475990711  | 1,476828929  | 11,73208  | 8,73E-32  | 1,28E-30    | 2,90E-31   | TRUE |
| Rv1018c | 561  | 86  | 2,705592206  | 0,706430424  | 5,7374285 | 9,61E-09  | 3,97E-08    | 9,00E-09   | TRUE |
| Rv1022  | 90   | 10  | 3,169925001  | 1,17076322   | 3,5137012 | 0,0004419 | 0,001029469 | 0,00023361 | TRUE |
| Rv1027c | 37   | 2   | 4,209453366  | 2,210291584  | 3,5521171 | 0,0003821 | 0,000903584 | 0,00020492 | TRUE |
| Rv1032c | 129  | 82  | 0,653675251  | -1,345486531 | -7,477107 | 7,60E-14  | 4,66E-13    | 1,06E-13   | TRUE |
| Rv1033c | 303  | 31  | 3,288977673  | 1,289815891  | 6,9579398 | 3,45E-12  | 1,91E-11    | 4,33E-12   | TRUE |
| Rv1036c | 250  | 5   | 5,64385619   | 3,644694408  | 11,874767 | 1,60E-32  | 2,42E-31    | 5,49E-32   | TRUE |
| Rv1041c | 352  | 51  | 2,787006277  | 0,787844495  | 4,9972359 | 5,82E-07  | 1,95E-06    | 4,42E-07   | TRUE |
| Rv1042c | 145  | 18  | 3,009984089  | 1,010822307  | 3,9589074 | 7,53E-05  | 0,000194982 | 4,42E-05   | TRUE |
| Rv1043c | 238  | 19  | 3,64689025   | 1,647728468  | 7,4039372 | 1,32E-13  | 7,98E-13    | 1,81E-13   | TRUE |
| Rv1045  | 36   | 28  | 0,362570079  | -1,636591702 | -5,052904 | 4,35E-07  | 1,49E-06    | 3,37E-07   | TRUE |
| Rv1046c | 926  | 75  | 3,626049693  | 1,626887911  | 14,473356 | 1,79E-47  | 4,09E-46    | 9,29E-47   | TRUE |
| Rv1052  | 123  | 11  | 3,483082887  | 1,483921105  | 4,9314211 | 8,16E-07  | 2,69E-06    | 6,11E-07   | TRUE |
| Rv1055  | 130  | 17  | 2,934904972  | 0,93574319   | 3,5155569 | 0,0004388 | 0,001024419 | 0,00023239 | TRUE |
| Rv1056  | 74   | 4   | 4,209453366  | 2,210291584  | 5,0234771 | 5,07E-07  | 1,71E-06    | 3,89E-07   | TRUE |
| Rv1057  | 55   | 215 | -1,966833136 | -3,965994918 | -22,66247 | 1,05E-113 | 7,27E-112   | 1,65E-112  | TRUE |
| Rv1059  | 300  | 49  | 2,614108846  | 0,614947064  | 3,7104366 | 0,0002069 | 0,000506531 | 0,00011494 | TRUE |
| Rv1060  | 275  | 43  | 2,677023054  | 0,677861272  | 3,873432  | 0,0001073 | 0,00027131  | 6,16E-05   | TRUE |

|         |      |      |              |              |           |           |             |            |      |
|---------|------|------|--------------|--------------|-----------|-----------|-------------|------------|------|
| Rv1061  | 114  | 9    | 3,662965013  | 1,663803231  | 5,1596999 | 2,47E-07  | 8,72E-07    | 1,98E-07   | TRUE |
| Rv1063c | 173  | 114  | 0,601738213  | -1,397423568 | -9,074622 | 1,14E-19  | 9,76E-19    | 2,21E-19   | TRUE |
| Rv1065  | 407  | 363  | 0,165059246  | -1,834102536 | -19,7071  | 1,87E-86  | 9,36E-85    | 2,12E-85   | TRUE |
| Rv1066  | 96   | 254  | -1,403722186 | -3,402883968 | -23,30183 | 4,25E-120 | 3,10E-118   | 7,04E-119  | TRUE |
| Rv1069c | 236  | 35   | 2,753360032  | 0,754198251  | 3,9398609 | 8,15E-05  | 0,000209889 | 4,76E-05   | TRUE |
| Rv1070c | 287  | 44   | 2,705475308  | 0,706313526  | 4,1028619 | 4,08E-05  | 0,00010956  | 2,49E-05   | TRUE |
| Rv1071c | 241  | 24   | 3,327926836  | 1,328765054  | 6,3496811 | 2,16E-10  | 1,03E-09    | 2,34E-10   | TRUE |
| Rv1072  | 4260 | 1264 | 1,752856967  | -0,246304815 | -6,509847 | 7,52E-11  | 3,75E-10    | 8,50E-11   | TRUE |
| Rv1074c | 603  | 116  | 2,378033197  | 0,378871415  | 3,3765986 | 0,0007339 | 0,001637118 | 0,00037149 | TRUE |
| Rv1077  | 1502 | 270  | 2,4758535    | 0,476691719  | 6,5937575 | 4,29E-11  | 2,18E-10    | 4,95E-11   | TRUE |
| Rv1078  | 1664 | 289  | 2,525514036  | 0,526352254  | 7,5978444 | 3,01E-14  | 1,91E-13    | 4,33E-14   | TRUE |
| Rv1080c | 1344 | 120  | 3,485426827  | 1,486265045  | 16,323733 | 6,69E-60  | 2,13E-58    | 4,83E-59   | TRUE |
| Rv1081c | 44   | 26   | 0,7589919    | -1,240169881 | -3,952062 | 7,75E-05  | 0,00020012  | 4,54E-05   | TRUE |
| Rv1087  | 165  | 75   | 1,137503524  | -0,861658258 | -4,979971 | 6,36E-07  | 2,11E-06    | 4,80E-07   | TRUE |
| Rv1091  | 194  | 93   | 1,060754031  | -0,938407751 | -5,959694 | 2,53E-09  | 1,11E-08    | 2,52E-09   | TRUE |
| Rv1092c | 418  | 61   | 2,776621795  | 0,777460013  | 5,3835922 | 7,30E-08  | 2,74E-07    | 6,21E-08   | TRUE |
| Rv1093  | 602  | 104  | 2,533179959  | 0,534018177  | 4,6291761 | 3,67E-06  | 1,13E-05    | 2,57E-06   | TRUE |
| Rv1094  | 3607 | 1377 | 1,389270864  | -0,609890918 | -15,79639 | 3,29E-56  | 9,77E-55    | 2,22E-55   | TRUE |
| Rv1095  | 1818 | 709  | 1,358494667  | -0,640667115 | -11,83598 | 2,54E-32  | 3,81E-31    | 8,66E-32   | TRUE |
| Rv1097c | 467  | 82   | 2,509726735  | 0,510564953  | 3,9139048 | 9,08E-05  | 0,000231979 | 5,26E-05   | TRUE |
| Rv1101c | 287  | 31   | 3,210710616  | 1,211548834  | 6,4476735 | 1,14E-10  | 5,58E-10    | 1,27E-10   | TRUE |
| Rv1102c | 122  | 4    | 4,930737338  | 2,931575556  | 7,5498652 | 4,36E-14  | 2,71E-13    | 6,14E-14   | TRUE |
| Rv1103c | 223  | 18   | 3,630974898  | 1,631813117  | 7,1171846 | 1,10E-12  | 6,34E-12    | 1,44E-12   | TRUE |
| Rv1105  | 31   | 1    | 4,95419631   | 2,955034529  | 3,8206038 | 0,0001331 | 0,000331573 | 7,52E-05   | TRUE |
| Rv1106c | 203  | 79   | 1,361555169  | -0,637606613 | -3,931813 | 8,43E-05  | 0,000216618 | 4,92E-05   | TRUE |
| Rv1107c | 358  | 158  | 1,180035029  | -0,819126753 | -6,922664 | 4,43E-12  | 2,43E-11    | 5,52E-12   | TRUE |
| Rv1110  | 777  | 667  | 0,220227837  | -1,778933945 | -26,16401 | 6,83E-151 | 7,09E-149   | 1,61E-149  | TRUE |
| Rv1112  | 124  | 10   | 3,632268215  | 1,633106434  | 5,3101446 | 1,10E-07  | 4,01E-07    | 9,09E-08   | TRUE |
| Rv1113  | 111  | 13   | 3,093976148  | 1,094814366  | 3,6973809 | 0,0002178 | 0,000532636 | 0,00012087 | TRUE |
| Rv1114  | 146  | 19   | 2,941897045  | 0,942735264  | 3,7489286 | 0,0001776 | 0,000436672 | 9,91E-05   | TRUE |
| Rv1117  | 412  | 51   | 3,014075185  | 1,014913403  | 6,6959117 | 2,14E-11  | 1,12E-10    | 2,53E-11   | TRUE |
| Rv1122  | 279  | 225  | 0,310340121  | -1,688821661 | -14,64943 | 1,36E-48  | 3,31E-47    | 7,50E-48   | TRUE |
| Rv1123c | 175  | 24   | 2,866248611  | 0,867086829  | 3,8248882 | 0,0001308 | 0,000326375 | 7,41E-05   | TRUE |
| Rv1127c | 750  | 109  | 2,782562461  | 0,783400679  | 7,2594718 | 3,89E-13  | 2,29E-12    | 5,21E-13   | TRUE |
| Rv1128c | 165  | 22   | 2,906890596  | 0,907728814  | 3,8607837 | 0,000113  | 0,000284109 | 6,45E-05   | TRUE |
| Rv1129c | 243  | 20   | 3,602884409  | 1,603722627  | 7,3372511 | 2,18E-13  | 1,31E-12    | 2,97E-13   | TRUE |
| Rv1130  | 2089 | 70   | 4,89931376   | 2,900151978  | 31,081585 | 4,27E-212 | 7,66E-210   | 1,74E-210  | TRUE |

|         |      |      |             |              |           |           |             |            |      |
|---------|------|------|-------------|--------------|-----------|-----------|-------------|------------|------|
| Rv1131  | 932  | 30   | 4,957295549 | 2,958133767  | 20,961461 | 1,47E-97  | 8,55E-96    | 1,94E-96   | TRUE |
| Rv1132  | 638  | 72   | 3,147487612 | 1,14832583   | 9,2126518 | 3,18E-20  | 2,78E-19    | 6,31E-20   | TRUE |
| Rv1133c | 3561 | 1515 | 1,232964642 | -0,76619714  | -20,2603  | 2,88E-91  | 1,58E-89    | 3,58E-90   | TRUE |
| Rv1135c | 78   | 1    | 6,285402219 | 4,286240437  | 6,9795917 | 2,96E-12  | 1,65E-11    | 3,74E-12   | TRUE |
| Rv1137c | 11   | 10   | 0,137503524 | -1,861658258 | -3,303531 | 0,0009548 | 0,002093136 | 0,00047497 | TRUE |
| Rv1138c | 49   | 25   | 0,970853654 | -1,028308128 | -3,333448 | 0,0008578 | 0,001892078 | 0,00042921 | TRUE |
| Rv1141c | 112  | 9    | 3,637429921 | 1,638268139  | 5,0580799 | 4,23E-07  | 1,45E-06    | 3,29E-07   | TRUE |
| Rv1145  | 49   | 3    | 4,029747343 | 2,030585562  | 3,8741933 | 0,000107  | 0,000270811 | 6,15E-05   | TRUE |
| Rv1148c | 222  | 28   | 2,987060944 | 0,987899162  | 4,806597  | 1,54E-06  | 4,98E-06    | 1,13E-06   | TRUE |
| Rv1149  | 1298 | 222  | 2,547658802 | 0,54849702   | 6,9653525 | 3,28E-12  | 1,81E-11    | 4,12E-12   | TRUE |
| Rv1151c | 89   | 71   | 0,325986311 | -1,67317547  | -8,17431  | 2,98E-16  | 2,11E-15    | 4,78E-16   | TRUE |
| Rv1152  | 157  | 20   | 2,972692654 | 0,973530872  | 3,993225  | 6,52E-05  | 0,000169797 | 3,85E-05   | TRUE |
| Rv1153c | 98   | 12   | 3,029747343 | 1,030585562  | 3,3069078 | 0,0009433 | 0,002069217 | 0,00046955 | TRUE |
| Rv1156  | 2052 | 275  | 2,899527207 | 0,900365425  | 13,527324 | 1,08E-41  | 2,14E-40    | 4,85E-41   | TRUE |
| Rv1157c | 322  | 19   | 4,082989365 | 2,083827583  | 10,098604 | 5,60E-24  | 6,09E-23    | 1,38E-23   | TRUE |
| Rv1159A | 229  | 34   | 2,751740947 | 0,752579165  | 3,8737401 | 0,0001072 | 0,000271141 | 6,15E-05   | TRUE |
| Rv1161  | 3225 | 1286 | 1,326408518 | -0,672753264 | -16,65467 | 2,80E-62  | 9,35E-61    | 2,12E-61   | TRUE |
| Rv1162  | 1023 | 422  | 1,277491241 | -0,721670541 | -10,13977 | 3,68E-24  | 4,04E-23    | 9,16E-24   | TRUE |
| Rv1164  | 518  | 91   | 2,509013647 | 0,509851866  | 4,1168849 | 3,84E-05  | 0,000103386 | 2,35E-05   | TRUE |
| Rv1168c | 930  | 138  | 2,752562449 | 0,753400667  | 7,8150857 | 5,49E-15  | 3,60E-14    | 8,17E-15   | TRUE |
| Rv1169c | 37   | 0    | 6,209453366 | 4,210291584  | 4,7844697 | 1,71E-06  | 5,50E-06    | 1,25E-06   | TRUE |
| Rv1172c | 656  | 79   | 3,053771256 | 1,054609475  | 8,719849  | 2,79E-18  | 2,19E-17    | 4,97E-18   | TRUE |
| Rv1173  | 3205 | 1339 | 1,259168396 | -0,739993386 | -18,47678 | 3,18E-76  | 1,33E-74    | 3,02E-75   | TRUE |
| Rv1174c | 1311 | 272  | 2,268989129 | 0,269827347  | 3,6141475 | 0,0003013 | 0,000723797 | 0,00016424 | TRUE |
| Rv1175c | 608  | 62   | 3,293731203 | 1,294569421  | 9,8849698 | 4,84E-23  | 4,94E-22    | 1,12E-22   | TRUE |
| Rv1176c | 59   | 4    | 3,882643049 | 1,883481267  | 4,0450209 | 5,23E-05  | 0,00013793  | 3,13E-05   | TRUE |
| Rv1177  | 1474 | 624  | 1,24011859  | -0,759043192 | -12,88708 | 5,32E-38  | 9,54E-37    | 2,16E-37   | TRUE |
| Rv1179c | 398  | 146  | 1,446800062 | -0,55236172  | -4,699704 | 2,61E-06  | 8,17E-06    | 1,85E-06   | TRUE |
| Rv1180  | 582  | 330  | 0,818553129 | -1,180608653 | -13,54573 | 8,40E-42  | 1,68E-40    | 3,81E-41   | TRUE |
| Rv1181  | 574  | 182  | 1,657112286 | -0,342049495 | -3,370104 | 0,0007514 | 0,001675251 | 0,00038015 | TRUE |
| Rv1182  | 76   | 69   | 0,139403057 | -1,859758725 | -8,671975 | 4,25E-18  | 3,30E-17    | 7,50E-18   | TRUE |
| Rv1184c | 1260 | 680  | 0,889817082 | -1,1093447   | -18,50315 | 1,95E-76  | 8,26E-75    | 1,87E-75   | TRUE |
| Rv1186c | 173  | 12   | 3,849665727 | 1,850503945  | 6,8444077 | 7,68E-12  | 4,14E-11    | 9,40E-12   | TRUE |
| Rv1194c | 694  | 96   | 2,853829352 | 0,85466757   | 7,5248368 | 5,28E-14  | 3,26E-13    | 7,39E-14   | TRUE |
| Rv1196  | 3937 | 1084 | 1,860731956 | -0,138429826 | -3,451622 | 0,0005572 | 0,001274772 | 0,00028927 | TRUE |
| Rv1197  | 1612 | 225  | 2,840854837 | 0,841693055  | 11,32189  | 1,02E-29  | 1,40E-28    | 3,18E-29   | TRUE |
| Rv1198  | 1873 | 294  | 2,671462839 | 0,672301058  | 10,039183 | 1,03E-23  | 1,10E-22    | 2,49E-23   | TRUE |

|         |      |     |              |              |           |           |             |            |      |
|---------|------|-----|--------------|--------------|-----------|-----------|-------------|------------|------|
| Rv1201c | 760  | 486 | 0,645043105  | -1,354118677 | -18,2978  | 8,62E-75  | 3,47E-73    | 7,87E-74   | TRUE |
| Rv1202  | 138  | 61  | 1,177787119  | -0,821374663 | -4,31116  | 1,62E-05  | 4,60E-05    | 1,04E-05   | TRUE |
| Rv1204c | 195  | 82  | 1,249778309  | -0,749383473 | -4,617697 | 3,88E-06  | 1,19E-05    | 2,71E-06   | TRUE |
| Rv1205  | 141  | 59  | 1,256908303  | -0,742253479 | -3,884369 | 0,0001026 | 0,000260051 | 5,90E-05   | TRUE |
| Rv1206  | 262  | 133 | 0,978140566  | -1,021021216 | -7,644469 | 2,10E-14  | 1,33E-13    | 3,03E-14   | TRUE |
| Rv1208  | 358  | 53  | 2,755895323  | 0,756733541  | 4,8668144 | 1,13E-06  | 3,71E-06    | 8,42E-07   | TRUE |
| Rv1214c | 11   | 11  | 0            | -1,999161782 | -3,633077 | 0,0002801 | 0,000675985 | 0,00015339 | TRUE |
| Rv1215c | 346  | 165 | 1,068306013  | -0,930855768 | -7,885147 | 3,14E-15  | 2,11E-14    | 4,79E-15   | TRUE |
| Rv1216c | 216  | 17  | 3,667424661  | 1,668262879  | 7,1159508 | 1,11E-12  | 6,39E-12    | 1,45E-12   | TRUE |
| Rv1218c | 115  | 8   | 3,845490051  | 1,846328269  | 5,5717431 | 2,52E-08  | 9,98E-08    | 2,26E-08   | TRUE |
| Rv1219c | 66   | 3   | 4,459431619  | 2,460269837  | 5,0568513 | 4,26E-07  | 1,46E-06    | 3,31E-07   | TRUE |
| Rv1220c | 142  | 61  | 1,219009782  | -0,780152    | -4,124152 | 3,72E-05  | 0,000100519 | 2,28E-05   | TRUE |
| Rv1222  | 459  | 165 | 1,476028129  | -0,523133653 | -4,755906 | 1,98E-06  | 6,27E-06    | 1,42E-06   | TRUE |
| Rv1230c | 279  | 106 | 1,396200857  | -0,602960925 | -4,332986 | 1,47E-05  | 4,20E-05    | 9,53E-06   | TRUE |
| Rv1231c | 198  | 25  | 2,98550043   | 0,986338648  | 4,5333847 | 5,80E-06  | 1,74E-05    | 3,94E-06   | TRUE |
| Rv1232c | 1073 | 219 | 2,292647301  | 0,293485519  | 3,5415757 | 0,0003977 | 0,0009371   | 0,00021265 | TRUE |
| Rv1233c | 2488 | 111 | 4,486354904  | 2,487193122  | 31,250857 | 2,17E-214 | 4,08E-212   | 9,26E-213  | TRUE |
| Rv1234  | 258  | 15  | 4,10433666   | 2,105174878  | 9,0982759 | 9,18E-20  | 7,92E-19    | 1,80E-19   | TRUE |
| Rv1235  | 235  | 20  | 3,554588852  | 1,55542707   | 7,05698   | 1,70E-12  | 9,66E-12    | 2,19E-12   | TRUE |
| Rv1238  | 543  | 96  | 2,499845887  | 0,500684105  | 4,1458759 | 3,39E-05  | 9,22E-05    | 2,09E-05   | TRUE |
| Rv1239c | 197  | 29  | 2,764070824  | 0,764909042  | 3,6439498 | 0,0002685 | 0,000649239 | 0,00014732 | TRUE |
| Rv1240  | 820  | 120 | 2,772589504  | 0,773427722  | 7,5071414 | 6,04E-14  | 3,72E-13    | 8,44E-14   | TRUE |
| Rv1241  | 534  | 26  | 4,360256214  | 2,361094432  | 14,044268 | 8,35E-45  | 1,80E-43    | 4,08E-44   | TRUE |
| Rv1242  | 149  | 8   | 4,21916852   | 2,220006739  | 7,1475897 | 8,83E-13  | 5,12E-12    | 1,16E-12   | TRUE |
| Rv1243c | 36   | 2   | 4,169925001  | 2,17076322   | 3,4647773 | 0,0005307 | 0,001218966 | 0,00027645 | TRUE |
| Rv1245c | 293  | 22  | 3,735325236  | 1,736163454  | 8,5243425 | 1,54E-17  | 1,16E-16    | 2,62E-17   | TRUE |
| Rv1246c | 36   | 0   | 6,169925001  | 4,17076322   | 4,7071967 | 2,51E-06  | 7,89E-06    | 1,79E-06   | TRUE |
| Rv1247c | 49   | 4   | 3,614709844  | 1,615548062  | 3,3121884 | 0,0009257 | 0,00203168  | 0,00046103 | TRUE |
| Rv1248c | 2169 | 293 | 2,888057483  | 0,888895701  | 13,758139 | 4,55E-43  | 9,50E-42    | 2,16E-42   | TRUE |
| Rv1250  | 148  | 17  | 3,121990524  | 1,122828742  | 4,3574393 | 1,32E-05  | 3,77E-05    | 8,56E-06   | TRUE |
| Rv1251c | 504  | 46  | 3,453717967  | 1,454556186  | 9,8354288 | 7,92E-23  | 7,99E-22    | 1,81E-22   | TRUE |
| Rv1252c | 125  | 11  | 3,506352666  | 1,507190884  | 5,0289907 | 4,93E-07  | 1,67E-06    | 3,79E-07   | TRUE |
| Rv1253  | 355  | 37  | 3,262221849  | 1,263060067  | 7,4094814 | 1,27E-13  | 7,67E-13    | 1,74E-13   | TRUE |
| Rv1255c | 11   | 12  | -0,125530882 | -2,124692664 | -3,946118 | 7,94E-05  | 0,000204749 | 4,65E-05   | TRUE |
| Rv1263  | 95   | 6   | 3,984893108  | 1,985731326  | 5,316463  | 1,06E-07  | 3,88E-07    | 8,81E-08   | TRUE |
| Rv1267c | 69   | 7   | 3,301169535  | 1,302007753  | 3,3445175 | 0,0008243 | 0,001823772 | 0,00041359 | TRUE |
| Rv1270c | 142  | 11  | 3,690315501  | 1,691153719  | 5,8256026 | 5,69E-09  | 2,40E-08    | 5,45E-09   | TRUE |

|         |      |      |              |              |           |           |             |            |      |
|---------|------|------|--------------|--------------|-----------|-----------|-------------|------------|------|
| Rv1274  | 1622 | 328  | 2,3060061    | 0,306844318  | 4,5426509 | 5,56E-06  | 1,67E-05    | 3,78E-06   | TRUE |
| Rv1275  | 587  | 198  | 1,567860073  | -0,431301709 | -4,364353 | 1,27E-05  | 3,66E-05    | 8,30E-06   | TRUE |
| Rv1276c | 37   | 2    | 4,209453366  | 2,210291584  | 3,5521171 | 0,0003821 | 0,000903584 | 0,00020492 | TRUE |
| Rv1277  | 191  | 29   | 2,719447833  | 0,720286051  | 3,404937  | 0,0006618 | 0,001492345 | 0,00033864 | TRUE |
| Rv1278  | 470  | 83   | 2,501477515  | 0,502315733  | 3,8685463 | 0,0001095 | 0,000276096 | 6,27E-05   | TRUE |
| Rv1280c | 398  | 66   | 2,592230501  | 0,593068719  | 4,1374231 | 3,51E-05  | 9,54E-05    | 2,16E-05   | TRUE |
| Rv1287  | 92   | 11   | 3,064130337  | 1,064968556  | 3,2913002 | 0,0009973 | 0,00218267  | 0,00049529 | TRUE |
| Rv1290c | 102  | 10   | 3,350497247  | 1,351335465  | 4,1845507 | 2,86E-05  | 7,84E-05    | 1,78E-05   | TRUE |
| Rv1292  | 426  | 40   | 3,412781525  | 1,413619743  | 8,8503465 | 8,72E-19  | 7,04E-18    | 1,60E-18   | TRUE |
| Rv1293  | 1352 | 265  | 2,351030887  | 0,351869105  | 4,7186106 | 2,37E-06  | 7,50E-06    | 1,70E-06   | TRUE |
| Rv1294  | 1469 | 285  | 2,365800572  | 0,36663879   | 5,1120439 | 3,19E-07  | 1,11E-06    | 2,52E-07   | TRUE |
| Rv1295  | 611  | 204  | 1,582603228  | -0,416558554 | -4,289531 | 1,79E-05  | 5,04E-05    | 1,14E-05   | TRUE |
| Rv1296  | 358  | 54   | 2,728928275  | 0,729766493  | 4,7153672 | 2,41E-06  | 7,61E-06    | 1,73E-06   | TRUE |
| Rv1297  | 4967 | 925  | 2,424849476  | 0,425687694  | 10,812208 | 3,01E-27  | 3,70E-26    | 8,38E-27   | TRUE |
| Rv1298  | 1498 | 305  | 2,296156476  | 0,296994694  | 4,2325133 | 2,31E-05  | 6,43E-05    | 1,46E-05   | TRUE |
| Rv1299  | 945  | 158  | 2,580389771  | 0,581227989  | 6,2617111 | 3,81E-10  | 1,80E-09    | 4,08E-10   | TRUE |
| Rv1301  | 479  | 231  | 1,052132804  | -0,947028978 | -9,465879 | 2,91E-21  | 2,67E-20    | 6,06E-21   | TRUE |
| Rv1302  | 481  | 180  | 1,418039987  | -0,581121794 | -5,462894 | 4,68E-08  | 1,79E-07    | 4,07E-08   | TRUE |
| Rv1305  | 927  | 172  | 2,430160774  | 0,430998992  | 4,7201501 | 2,36E-06  | 7,45E-06    | 1,69E-06   | TRUE |
| Rv1309  | 1883 | 390  | 2,271486971  | 0,272325189  | 4,3702732 | 1,24E-05  | 3,58E-05    | 8,12E-06   | TRUE |
| Rv1310  | 3320 | 1207 | 1,459757565  | -0,539404216 | -13,23898 | 5,23E-40  | 9,81E-39    | 2,23E-39   | TRUE |
| Rv1311  | 1188 | 694  | 0,775527268  | -1,223634514 | -20,21392 | 7,38E-91  | 3,99E-89    | 9,05E-90   | TRUE |
| Rv1312  | 823  | 282  | 1,545197268  | -0,453964514 | -5,461127 | 4,73E-08  | 1,81E-07    | 4,10E-08   | TRUE |
| Rv1313c | 72   | 7    | 3,362570079  | 1,363408298  | 3,5397029 | 0,0004006 | 0,000941525 | 0,00021355 | TRUE |
| Rv1315  | 513  | 86   | 2,576550261  | 0,577388479  | 4,585664  | 4,53E-06  | 1,38E-05    | 3,13E-06   | TRUE |
| Rv1317c | 56   | 62   | -0,146841388 | -2,14600317  | -9,026464 | 1,77E-19  | 1,50E-18    | 3,41E-19   | TRUE |
| Rv1320c | 326  | 38   | 3,100800641  | 1,101638859  | 6,3686152 | 1,91E-10  | 9,21E-10    | 2,09E-10   | TRUE |
| Rv1321  | 399  | 152  | 1,392317423  | -0,606844359 | -5,2188   | 1,80E-07  | 6,44E-07    | 1,46E-07   | TRUE |
| Rv1322  | 52   | 2    | 4,700439718  | 2,701277936  | 4,7266972 | 2,28E-06  | 7,22E-06    | 1,64E-06   | TRUE |
| Rv1324  | 1554 | 566  | 1,457112546  | -0,542049236 | -9,100555 | 8,99E-20  | 7,77E-19    | 1,76E-19   | TRUE |
| Rv1326c | 526  | 56   | 3,231564067  | 1,232402285  | 8,8474168 | 8,96E-19  | 7,21E-18    | 1,64E-18   | TRUE |
| Rv1328  | 706  | 137  | 2,36549229   | 0,366330508  | 3,540461  | 0,0003994 | 0,000939944 | 0,00021329 | TRUE |
| Rv1331  | 2670 | 416  | 2,682184308  | 0,683022527  | 12,157031 | 5,26E-34  | 8,34E-33    | 1,89E-33   | TRUE |
| Rv1332  | 584  | 65   | 3,167456746  | 1,168294964  | 8,936355  | 4,02E-19  | 3,29E-18    | 7,47E-19   | TRUE |
| Rv1334  | 405  | 33   | 3,617383978  | 1,618222197  | 9,5342587 | 1,51E-21  | 1,41E-20    | 3,19E-21   | TRUE |
| Rv1335  | 138  | 15   | 3,201633861  | 1,202472079  | 4,444333  | 8,82E-06  | 2,58E-05    | 5,85E-06   | TRUE |
| Rv1336  | 385  | 36   | 3,418789634  | 1,419627852  | 8,4405819 | 3,16E-17  | 2,33E-16    | 5,29E-17   | TRUE |



|         |      |      |             |              |           |           |             |            |      |
|---------|------|------|-------------|--------------|-----------|-----------|-------------|------------|------|
| Rv1337  | 937  | 127  | 2,883220551 | 0,884058769  | 8,9987228 | 2,28E-19  | 1,92E-18    | 4,36E-19   | TRUE |
| Rv1338  | 305  | 42   | 2,86034801  | 0,861186228  | 5,0204228 | 5,16E-07  | 1,74E-06    | 3,94E-07   | TRUE |
| Rv1340  | 287  | 100  | 1,521050737 | -0,478111045 | -3,410117 | 0,0006494 | 0,001467644 | 0,00033304 | TRUE |
| Rv1342c | 132  | 15   | 3,137503524 | 1,138341742  | 4,1608084 | 3,17E-05  | 8,68E-05    | 1,97E-05   | TRUE |
| Rv1350  | 79   | 7    | 3,496425826 | 1,497264044  | 3,9784434 | 6,94E-05  | 0,000180169 | 4,09E-05   | TRUE |
| Rv1352  | 216  | 87   | 1,311944006 | -0,687217776 | -4,409096 | 1,04E-05  | 3,02E-05    | 6,85E-06   | TRUE |
| Rv1354c | 60   | 3    | 4,321928095 | 2,322766313  | 4,6618106 | 3,13E-06  | 9,76E-06    | 2,21E-06   | TRUE |
| Rv1361c | 2090 | 260  | 3,006919414 | 1,007757632  | 14,998508 | 7,51E-51  | 1,97E-49    | 4,48E-50   | TRUE |
| Rv1362c | 106  | 7    | 3,920565533 | 1,921403751  | 5,4948273 | 3,91E-08  | 1,50E-07    | 3,41E-08   | TRUE |
| Rv1363c | 209  | 16   | 3,707359132 | 1,70819735   | 7,1178151 | 1,10E-12  | 6,32E-12    | 1,43E-12   | TRUE |
| Rv1364c | 267  | 14   | 4,25334101  | 2,254179228  | 9,6580886 | 4,54E-22  | 4,38E-21    | 9,94E-22   | TRUE |
| Rv1366  | 135  | 7    | 4,269460675 | 2,270298893  | 6,8972553 | 5,30E-12  | 2,88E-11    | 6,54E-12   | TRUE |
| Rv1366A | 276  | 38   | 2,860596943 | 0,861435161  | 4,7769314 | 1,78E-06  | 5,70E-06    | 1,29E-06   | TRUE |
| Rv1367c | 120  | 16   | 2,906890596 | 0,907728814  | 3,2924563 | 0,0009932 | 0,002174923 | 0,00049353 | TRUE |
| Rv1372  | 217  | 30   | 2,854660637 | 0,855498855  | 4,2107793 | 2,54E-05  | 7,01E-05    | 1,59E-05   | TRUE |
| Rv1374c | 50   | 0    | 6,64385619  | 4,644694408  | 5,6907699 | 1,26E-08  | 5,16E-08    | 1,17E-08   | TRUE |
| Rv1375  | 148  | 19   | 2,961525852 | 0,96236407   | 3,8400256 | 0,000123  | 0,000307476 | 6,98E-05   | TRUE |
| Rv1377c | 87   | 44   | 0,983511877 | -1,015649905 | -4,37754  | 1,20E-05  | 3,47E-05    | 7,86E-06   | TRUE |
| Rv1378c | 142  | 74   | 0,940293754 | -1,058868028 | -5,874557 | 4,24E-09  | 1,81E-08    | 4,10E-09   | TRUE |
| Rv1380  | 124  | 14   | 3,146841388 | 1,147679606  | 4,0592532 | 4,92E-05  | 0,000130136 | 2,95E-05   | TRUE |
| Rv1381  | 150  | 17   | 3,141355849 | 1,142194067  | 4,4474923 | 8,69E-06  | 2,54E-05    | 5,77E-06   | TRUE |
| Rv1386  | 1045 | 66   | 3,984893108 | 1,985731326  | 17,635138 | 1,32E-69  | 4,88E-68    | 1,11E-68   | TRUE |
| Rv1387  | 2879 | 238  | 3,59653431  | 1,597372528  | 25,193911 | 4,67E-140 | 4,19E-138   | 9,50E-139  | TRUE |
| Rv1390  | 643  | 88   | 2,869243309 | 0,870081527  | 7,3539467 | 1,92E-13  | 1,16E-12    | 2,63E-13   | TRUE |
| Rv1392  | 1106 | 611  | 0,8561071   | -1,143054681 | -17,96592 | 3,60E-72  | 1,41E-70    | 3,19E-71   | TRUE |
| Rv1393c | 162  | 74   | 1,130396637 | -0,868765145 | -4,981316 | 6,32E-07  | 2,11E-06    | 4,78E-07   | TRUE |
| Rv1394c | 214  | 141  | 0,601915634 | -1,397246148 | -10,09142 | 6,03E-24  | 6,51E-23    | 1,48E-23   | TRUE |
| Rv1398c | 4824 | 1409 | 1,775558296 | -0,223603486 | -6,265255 | 3,72E-10  | 1,76E-09    | 3,99E-10   | TRUE |
| Rv1402  | 123  | 73   | 0,752689946 | -1,246471835 | -6,648762 | 2,96E-11  | 1,52E-10    | 3,46E-11   | TRUE |
| Rv1404  | 287  | 33   | 3,120512807 | 1,121351025  | 6,0616731 | 1,35E-09  | 6,07E-09    | 1,38E-09   | TRUE |
| Rv1405c | 108  | 7    | 3,94753258  | 1,948370798  | 5,5980473 | 2,17E-08  | 8,64E-08    | 1,96E-08   | TRUE |
| Rv1408  | 213  | 92   | 1,211147664 | -0,788014118 | -5,10903  | 3,24E-07  | 1,13E-06    | 2,56E-07   | TRUE |
| Rv1412  | 187  | 25   | 2,90303827  | 0,903876488  | 4,0954273 | 4,21E-05  | 0,000112944 | 2,56E-05   | TRUE |
| Rv1415  | 900  | 420  | 1,099535674 | -0,899626108 | -12,2269  | 2,23E-34  | 3,59E-33    | 8,16E-34   | TRUE |
| Rv1416  | 133  | 67   | 0,989193245 | -1,009968537 | -5,377008 | 7,57E-08  | 2,83E-07    | 6,42E-08   | TRUE |
| Rv1417  | 178  | 70   | 1,346450414 | -0,652711368 | -3,77882  | 0,0001576 | 0,00038988  | 8,84E-05   | TRUE |
| Rv1421  | 446  | 82   | 2,443347895 | 0,444186113  | 3,3661046 | 0,0007624 | 0,001695893 | 0,00038483 | TRUE |

|         |      |     |             |              |           |           |             |            |      |
|---------|------|-----|-------------|--------------|-----------|-----------|-------------|------------|------|
| Rv1424c | 150  | 20  | 2,906890596 | 0,907728814  | 3,6811012 | 0,0002322 | 0,000565202 | 0,00012822 | TRUE |
| Rv1427c | 249  | 36  | 2,790076931 | 0,790915149  | 4,2170297 | 2,48E-05  | 6,86E-05    | 1,56E-05   | TRUE |
| Rv1428c | 275  | 12  | 4,518325308 | 2,519163526  | 10,462292 | 1,29E-25  | 1,49E-24    | 3,39E-25   | TRUE |
| Rv1429  | 157  | 62  | 1,340424439 | -0,658737343 | -3,585398 | 0,0003366 | 0,000803516 | 0,00018233 | TRUE |
| Rv1433  | 324  | 55  | 2,558490289 | 0,559328507  | 3,5412362 | 0,0003983 | 0,000937746 | 0,00021279 | TRUE |
| Rv1435c | 384  | 139 | 1,466021428 | -0,533140354 | -4,440823 | 8,96E-06  | 2,62E-05    | 5,94E-06   | TRUE |
| Rv1436  | 658  | 313 | 1,071924927 | -0,927236855 | -10,82616 | 2,59E-27  | 3,19E-26    | 7,24E-27   | TRUE |
| Rv1437  | 1165 | 231 | 2,334365198 | 0,335203416  | 4,1845649 | 2,86E-05  | 7,85E-05    | 1,78E-05   | TRUE |
| Rv1438  | 802  | 147 | 2,447786082 | 0,4486243    | 4,555848  | 5,22E-06  | 1,57E-05    | 3,57E-06   | TRUE |
| Rv1440  | 438  | 72  | 2,604862058 | 0,605700276  | 4,4231479 | 9,73E-06  | 2,84E-05    | 6,44E-06   | TRUE |
| Rv1442  | 342  | 189 | 0,855610091 | -1,143551691 | -9,992381 | 1,65E-23  | 1,74E-22    | 3,96E-23   | TRUE |
| Rv1444c | 212  | 24  | 3,142957954 | 1,143796172  | 5,2933533 | 1,20E-07  | 4,38E-07    | 9,94E-08   | TRUE |
| Rv1445c | 146  | 15  | 3,282933963 | 1,283772181  | 4,8121407 | 1,49E-06  | 4,85E-06    | 1,10E-06   | TRUE |
| Rv1446c | 324  | 25  | 3,695993813 | 1,696832031  | 8,8208461 | 1,14E-18  | 9,09E-18    | 2,06E-18   | TRUE |
| Rv1448c | 1038 | 537 | 0,95081245  | -1,048349332 | -15,7023  | 1,46E-55  | 4,29E-54    | 9,74E-55   | TRUE |
| Rv1451  | 748  | 125 | 2,581110175 | 0,581948393  | 5,5768824 | 2,45E-08  | 9,71E-08    | 2,20E-08   | TRUE |
| Rv1457c | 118  | 15  | 2,975752454 | 0,976590672  | 3,4709155 | 0,0005187 | 0,001199122 | 0,0002721  | TRUE |
| Rv1461  | 1174 | 761 | 0,62546405  | -1,373697732 | -23,1536  | 1,34E-118 | 9,59E-117   | 2,18E-117  | TRUE |
| Rv1462  | 439  | 345 | 0,347624578 | -1,651537204 | -17,856   | 2,60E-71  | 9,94E-70    | 2,26E-70   | TRUE |
| Rv1463  | 122  | 57  | 1,097847323 | -0,901314458 | -4,510072 | 6,48E-06  | 1,93E-05    | 4,38E-06   | TRUE |
| Rv1464  | 261  | 132 | 0,983511877 | -1,015649905 | -7,582662 | 3,39E-14  | 2,14E-13    | 4,85E-14   | TRUE |
| Rv1466  | 165  | 79  | 1,062541466 | -0,936620316 | -5,484001 | 4,16E-08  | 1,60E-07    | 3,62E-08   | TRUE |
| Rv1468c | 129  | 60  | 1,10433666  | -0,894825122 | -4,599102 | 4,24E-06  | 1,30E-05    | 2,94E-06   | TRUE |
| Rv1472  | 470  | 64  | 2,876516947 | 0,877355165  | 6,3316354 | 2,43E-10  | 1,15E-09    | 2,62E-10   | TRUE |
| Rv1473  | 532  | 99  | 2,425925815 | 0,426764034  | 3,5429053 | 0,0003957 | 0,000933503 | 0,00021183 | TRUE |
| Rv1479  | 1497 | 274 | 2,449826423 | 0,450664641  | 6,2515027 | 4,07E-10  | 1,91E-09    | 4,34E-10   | TRUE |
| Rv1481  | 635  | 104 | 2,610173064 | 0,611011282  | 5,3677576 | 7,97E-08  | 2,98E-07    | 6,76E-08   | TRUE |
| Rv1483  | 647  | 67  | 3,271532712 | 1,27237093   | 10,060932 | 8,22E-24  | 8,81E-23    | 2,00E-23   | TRUE |
| Rv1485  | 410  | 70  | 2,550197083 | 0,551035301  | 3,9302474 | 8,49E-05  | 0,000217326 | 4,93E-05   | TRUE |
| Rv1486c | 360  | 149 | 1,272684576 | -0,726477206 | -6,058704 | 1,37E-09  | 6,17E-09    | 1,40E-09   | TRUE |
| Rv1489A | 204  | 147 | 0,472752997 | -1,526408785 | -11,00725 | 3,53E-28  | 4,47E-27    | 1,01E-27   | TRUE |
| Rv1492  | 184  | 103 | 0,837061429 | -1,162100353 | -7,4717   | 7,92E-14  | 4,84E-13    | 1,10E-13   | TRUE |
| Rv1498A | 142  | 12  | 3,564784619 | 1,565622837  | 5,5117879 | 3,55E-08  | 1,38E-07    | 3,13E-08   | TRUE |
| Rv1498c | 133  | 13  | 3,354842717 | 1,355680935  | 4,7900965 | 1,67E-06  | 5,35E-06    | 1,21E-06   | TRUE |
| Rv1500  | 298  | 30  | 3,312277925 | 1,313116143  | 6,9966281 | 2,62E-12  | 1,47E-11    | 3,33E-12   | TRUE |
| Rv1501  | 412  | 31  | 3,732304217 | 1,733142435  | 10,096129 | 5,75E-24  | 6,23E-23    | 1,41E-23   | TRUE |
| Rv1502  | 536  | 76  | 2,818161677 | 0,818999895  | 6,376121  | 1,82E-10  | 8,82E-10    | 2,00E-10   | TRUE |

|         |      |     |              |              |           |           |             |            |      |
|---------|------|-----|--------------|--------------|-----------|-----------|-------------|------------|------|
| Rv1505c | 278  | 27  | 3,364053571  | 1,364891789  | 6,9614491 | 3,37E-12  | 1,86E-11    | 4,23E-12   | TRUE |
| Rv1506c | 223  | 33  | 2,756505781  | 0,757343999  | 3,8436777 | 0,0001212 | 0,000303318 | 6,88E-05   | TRUE |
| Rv1507A | 27   | 0   | 5,754887502  | 3,75572572   | 3,9446262 | 7,99E-05  | 0,000205893 | 4,67E-05   | TRUE |
| Rv1508c | 934  | 77  | 3,600492199  | 1,601330417  | 14,370936 | 7,88E-47  | 1,80E-45    | 4,07E-46   | TRUE |
| Rv1511  | 392  | 54  | 2,859822342  | 0,86066056   | 5,6887372 | 1,28E-08  | 5,20E-08    | 1,18E-08   | TRUE |
| Rv1515c | 109  | 10  | 3,44625623   | 1,447094448  | 4,5560595 | 5,21E-06  | 1,57E-05    | 3,57E-06   | TRUE |
| Rv1517  | 152  | 8   | 4,247927513  | 2,248765732  | 7,2763563 | 3,43E-13  | 2,03E-12    | 4,62E-13   | TRUE |
| Rv1520  | 567  | 108 | 2,392317423  | 0,393155641  | 3,3892666 | 0,0007008 | 0,001568643 | 0,00035596 | TRUE |
| Rv1521  | 1001 | 150 | 2,738407568  | 0,739245786  | 7,975258  | 1,52E-15  | 1,04E-14    | 2,37E-15   | TRUE |
| Rv1522c | 512  | 56  | 3,192645078  | 1,193483296  | 8,5104166 | 1,73E-17  | 1,30E-16    | 2,95E-17   | TRUE |
| Rv1523  | 86   | 5   | 4,10433666   | 2,105174878  | 5,2527666 | 1,50E-07  | 5,42E-07    | 1,23E-07   | TRUE |
| Rv1528c | 139  | 10  | 3,797012978  | 1,797851196  | 6,0151214 | 1,80E-09  | 7,98E-09    | 1,81E-09   | TRUE |
| Rv1529  | 357  | 46  | 2,956218308  | 0,957056526  | 5,9368186 | 2,91E-09  | 1,27E-08    | 2,88E-09   | TRUE |
| Rv1530  | 61   | 56  | 0,123382416  | -1,875779366 | -7,857845 | 3,91E-15  | 2,62E-14    | 5,94E-15   | TRUE |
| Rv1533  | 902  | 276 | 1,708459166  | -0,290702615 | -3,559019 | 0,0003722 | 0,000882287 | 0,00020021 | TRUE |
| Rv1543  | 286  | 23  | 3,636309381  | 1,637147599  | 8,0790298 | 6,53E-16  | 4,56E-15    | 1,03E-15   | TRUE |
| Rv1544  | 183  | 85  | 1,106308902  | -0,89285288  | -5,463944 | 4,66E-08  | 1,78E-07    | 4,05E-08   | TRUE |
| Rv1546  | 310  | 34  | 3,188661564  | 1,189499782  | 6,6043156 | 3,99E-11  | 2,03E-10    | 4,62E-11   | TRUE |
| Rv1547  | 1855 | 262 | 2,82378047   | 0,824618688  | 11,934838 | 7,79E-33  | 1,19E-31    | 2,69E-32   | TRUE |
| Rv1548c | 75   | 2   | 5,22881869   | 3,229656909  | 6,1931257 | 5,90E-10  | 2,73E-09    | 6,20E-10   | TRUE |
| Rv1549  | 46   | 1   | 5,523561956  | 3,524400174  | 5,0292589 | 4,92E-07  | 1,67E-06    | 3,79E-07   | TRUE |
| Rv1552  | 47   | 27  | 0,79970135   | -1,199460432 | -3,922725 | 8,76E-05  | 0,000223936 | 5,08E-05   | TRUE |
| Rv1565c | 681  | 101 | 2,753299505  | 0,754137723  | 6,6928487 | 2,19E-11  | 1,14E-10    | 2,58E-11   | TRUE |
| Rv1566c | 211  | 27  | 2,966211687  | 0,967049905  | 4,6036992 | 4,15E-06  | 1,27E-05    | 2,89E-06   | TRUE |
| Rv1569  | 210  | 81  | 1,374395515  | -0,624766267 | -3,909794 | 9,24E-05  | 0,000235657 | 5,35E-05   | TRUE |
| Rv1580c | 29   | 0   | 5,857980995  | 3,858819213  | 4,12596   | 3,69E-05  | 9,99E-05    | 2,27E-05   | TRUE |
| Rv1582c | 64   | 4   | 4            | 2,000838218  | 4,3853433 | 1,16E-05  | 3,36E-05    | 7,62E-06   | TRUE |
| Rv1585c | 9    | 10  | -0,152003093 | -2,151164875 | -3,630482 | 0,0002829 | 0,000682401 | 0,00015485 | TRUE |
| Rv1590  | 77   | 37  | 1,057333175  | -0,941828607 | -3,770387 | 0,000163  | 0,000402284 | 9,13E-05   | TRUE |
| Rv1592c | 362  | 23  | 3,976283931  | 1,977122149  | 10,348873 | 4,23E-25  | 4,87E-24    | 1,10E-24   | TRUE |
| Rv1593c | 457  | 81  | 2,496200352  | 0,49703857   | 3,7780364 | 0,0001581 | 0,000390618 | 8,86E-05   | TRUE |
| Rv1594  | 1644 | 804 | 1,031942893  | -0,967218889 | -17,98165 | 2,71E-72  | 1,07E-70    | 2,43E-71   | TRUE |
| Rv1595  | 866  | 515 | 0,749794593  | -1,249367189 | -17,69767 | 4,37E-70  | 1,66E-68    | 3,76E-69   | TRUE |
| Rv1596  | 1489 | 146 | 3,35030348   | 1,351141698  | 15,990316 | 1,49E-57  | 4,53E-56    | 1,03E-56   | TRUE |
| Rv1597  | 283  | 17  | 4,057195402  | 2,05803362   | 9,3919609 | 5,89E-21  | 5,33E-20    | 1,21E-20   | TRUE |
| Rv1599  | 325  | 142 | 1,194548788  | -0,804612993 | -6,46266  | 1,03E-10  | 5,07E-10    | 1,15E-10   | TRUE |
| Rv1600  | 414  | 75  | 2,464668267  | 0,465506485  | 3,3862018 | 0,0007087 | 0,001583572 | 0,00035934 | TRUE |

|         |      |     |             |              |           |           |             |            |      |
|---------|------|-----|-------------|--------------|-----------|-----------|-------------|------------|------|
| Rv1601  | 243  | 7   | 5,117457582 | 3,1182958    | 10,97315  | 5,14E-28  | 6,48E-27    | 1,47E-27   | TRUE |
| Rv1602  | 367  | 59  | 2,636993203 | 0,637831422  | 4,2398438 | 2,24E-05  | 6,23E-05    | 1,41E-05   | TRUE |
| Rv1606  | 190  | 24  | 2,984893108 | 0,985731326  | 4,4385824 | 9,06E-06  | 2,64E-05    | 6,00E-06   | TRUE |
| Rv1607  | 262  | 36  | 2,863498    | 0,864336218  | 4,6675134 | 3,05E-06  | 9,51E-06    | 2,16E-06   | TRUE |
| Rv1610  | 595  | 277 | 1,103003692 | -0,89615809  | -9,896075 | 4,33E-23  | 4,46E-22    | 1,01E-22   | TRUE |
| Rv1612  | 2765 | 509 | 2,441541919 | 0,442380137  | 8,3545556 | 6,57E-17  | 4,77E-16    | 1,08E-16   | TRUE |
| Rv1614  | 2741 | 473 | 2,534790239 | 0,535628458  | 9,909888  | 3,77E-23  | 3,90E-22    | 8,86E-23   | TRUE |
| Rv1615  | 334  | 47  | 2,829115441 | 0,829953659  | 5,0906576 | 3,57E-07  | 1,24E-06    | 2,80E-07   | TRUE |
| Rv1618  | 714  | 136 | 2,392317423 | 0,393155641  | 3,8034644 | 0,0001427 | 0,000354603 | 8,05E-05   | TRUE |
| Rv1619  | 170  | 81  | 1,069540933 | -0,929620849 | -5,518186 | 3,43E-08  | 1,33E-07    | 3,03E-08   | TRUE |
| Rv1620c | 203  | 137 | 0,567303834 | -1,431857948 | -10,13266 | 3,96E-24  | 4,32E-23    | 9,81E-24   | TRUE |
| Rv1623c | 706  | 81  | 3,12367437  | 1,124512589  | 9,5295894 | 1,58E-21  | 1,47E-20    | 3,33E-21   | TRUE |
| Rv1625c | 367  | 45  | 3,027783157 | 1,028621375  | 6,389766  | 1,66E-10  | 8,11E-10    | 1,84E-10   | TRUE |
| Rv1627c | 352  | 145 | 1,279522529 | -0,719639253 | -5,927569 | 3,07E-09  | 1,34E-08    | 3,03E-09   | TRUE |
| Rv1628c | 161  | 108 | 0,576029376 | -1,423132406 | -8,955056 | 3,40E-19  | 2,81E-18    | 6,37E-19   | TRUE |
| Rv1630  | 3813 | 630 | 2,597502797 | 0,598341015  | 12,918622 | 3,53E-38  | 6,39E-37    | 1,45E-37   | TRUE |
| Rv1631  | 1288 | 402 | 1,679865187 | -0,319296595 | -4,69502  | 2,67E-06  | 8,35E-06    | 1,90E-06   | TRUE |
| Rv1634  | 329  | 123 | 1,419429268 | -0,579732513 | -4,505893 | 6,61E-06  | 1,96E-05    | 4,46E-06   | TRUE |
| Rv1635c | 206  | 32  | 2,686500527 | 0,687338745  | 3,3936969 | 0,0006896 | 0,00154524  | 0,00035064 | TRUE |
| Rv1636  | 360  | 63  | 2,514573173 | 0,515411391  | 3,466012  | 0,0005282 | 0,001216215 | 0,00027598 | TRUE |
| Rv1637c | 118  | 12  | 3,297680549 | 1,298518767  | 4,3646667 | 1,27E-05  | 3,66E-05    | 8,30E-06   | TRUE |
| Rv1638A | 259  | 160 | 0,694880193 | -1,304281589 | -10,19776 | 2,03E-24  | 2,27E-23    | 5,14E-24   | TRUE |
| Rv1639c | 974  | 357 | 1,447997698 | -0,551164084 | -7,336059 | 2,20E-13  | 1,32E-12    | 2,99E-13   | TRUE |
| Rv1641  | 1362 | 278 | 2,292569915 | 0,293408133  | 3,9894147 | 6,62E-05  | 0,00017232  | 3,91E-05   | TRUE |
| Rv1642  | 386  | 63  | 2,615177114 | 0,616015332  | 4,2154128 | 2,49E-05  | 6,90E-05    | 1,56E-05   | TRUE |
| Rv1651c | 337  | 58  | 2,538623786 | 0,539462004  | 3,4953279 | 0,0004735 | 0,001100415 | 0,00024971 | TRUE |
| Rv1660  | 136  | 15  | 3,180572246 | 1,181410464  | 4,3505812 | 1,36E-05  | 3,89E-05    | 8,82E-06   | TRUE |
| Rv1662  | 752  | 247 | 1,60622162  | -0,392940162 | -4,470855 | 7,79E-06  | 2,29E-05    | 5,21E-06   | TRUE |
| Rv1665  | 284  | 17  | 4,062284278 | 2,063122496  | 9,4234913 | 4,36E-21  | 3,97E-20    | 9,00E-21   | TRUE |
| Rv1670  | 41   | 1   | 5,357552005 | 3,358390223  | 4,6564651 | 3,22E-06  | 1,00E-05    | 2,27E-06   | TRUE |
| Rv1676  | 323  | 29  | 3,47740936  | 1,478247578  | 7,9689139 | 1,60E-15  | 1,09E-14    | 2,48E-15   | TRUE |
| Rv1682  | 100  | 5   | 4,321928095 | 2,322766313  | 6,0184026 | 1,76E-09  | 7,85E-09    | 1,78E-09   | TRUE |
| Rv1683  | 659  | 89  | 2,888401224 | 0,889239442  | 7,5836062 | 3,36E-14  | 2,12E-13    | 4,82E-14   | TRUE |
| Rv1685c | 36   | 2   | 4,169925001 | 2,17076322   | 3,4647773 | 0,0005307 | 0,001218966 | 0,00027645 | TRUE |
| Rv1691  | 128  | 14  | 3,192645078 | 1,193483296  | 4,2548971 | 2,09E-05  | 5,84E-05    | 1,32E-05   | TRUE |
| Rv1692  | 168  | 24  | 2,807354922 | 0,80819314   | 3,5288955 | 0,0004173 | 0,000978492 | 0,00022204 | TRUE |
| Rv1693  | 109  | 45  | 1,276331228 | -0,722830553 | -3,314678 | 0,0009175 | 0,002014792 | 0,00045719 | TRUE |

|         |      |      |              |              |           |           |             |            |      |
|---------|------|------|--------------|--------------|-----------|-----------|-------------|------------|------|
| Rv1696  | 285  | 115  | 1,309328058  | -0,689833724 | -5,086312 | 3,65E-07  | 1,26E-06    | 2,87E-07   | TRUE |
| Rv1697  | 1053 | 208  | 2,339850003  | 0,340688221  | 4,0394733 | 5,36E-05  | 0,000140951 | 3,20E-05   | TRUE |
| Rv1698  | 439  | 58   | 2,920096134  | 0,920934353  | 6,3748407 | 1,83E-10  | 8,86E-10    | 2,01E-10   | TRUE |
| Rv1699  | 860  | 107  | 3,006725863  | 1,007564081  | 9,6171576 | 6,77E-22  | 6,45E-21    | 1,46E-21   | TRUE |
| Rv1700  | 434  | 194  | 1,16163839   | -0,837523392 | -7,818438 | 5,35E-15  | 3,51E-14    | 7,96E-15   | TRUE |
| Rv1701  | 122  | 57   | 1,097847323  | -0,901314458 | -4,510072 | 6,48E-06  | 1,93E-05    | 4,38E-06   | TRUE |
| Rv1703c | 532  | 68   | 2,967819594  | 0,968657812  | 7,3206681 | 2,47E-13  | 1,48E-12    | 3,35E-13   | TRUE |
| Rv1708  | 384  | 47   | 3,030373649  | 1,031211867  | 6,5496244 | 5,77E-11  | 2,90E-10    | 6,58E-11   | TRUE |
| Rv1709  | 283  | 18   | 3,974733241  | 1,97557146   | 9,1454052 | 5,94E-20  | 5,16E-19    | 1,17E-19   | TRUE |
| Rv1710  | 284  | 40   | 2,827819025  | 0,828657243  | 4,687851  | 2,76E-06  | 8,62E-06    | 1,96E-06   | TRUE |
| Rv1728c | 309  | 24   | 3,686500527  | 1,687338745  | 8,5801301 | 9,48E-18  | 7,23E-17    | 1,64E-17   | TRUE |
| Rv1730c | 184  | 10   | 4,201633861  | 2,202472079  | 7,9041145 | 2,70E-15  | 1,82E-14    | 4,14E-15   | TRUE |
| Rv1732c | 104  | 13   | 3            | 1,000838218  | 3,3254075 | 0,0008829 | 0,001943155 | 0,00044094 | TRUE |
| Rv1733c | 170  | 258  | -0,601836319 | -2,600998101 | -20,62705 | 1,57E-94  | 8,97E-93    | 2,02E-93   | TRUE |
| Rv1736c | 1196 | 68   | 4,136538833  | 2,137377051  | 19,78063  | 4,37E-87  | 2,21E-85    | 5,02E-86   | TRUE |
| Rv1737c | 507  | 248  | 1,031645627  | -0,967516155 | -9,984802 | 1,78E-23  | 1,88E-22    | 4,26E-23   | TRUE |
| Rv1738  | 2494 | 2148 | 0,215467472  | -1,78369431  | -47,08259 | 0         | 0           | 0          | TRUE |
| Rv1740  | 115  | 15   | 2,938599455  | 0,939437673  | 3,3174414 | 0,0009085 | 0,001996081 | 0,00045295 | TRUE |
| Rv1741  | 107  | 2    | 5,741466986  | 3,742305205  | 7,8428504 | 4,40E-15  | 2,92E-14    | 6,62E-15   | TRUE |
| Rv1743  | 663  | 69   | 3,264340603  | 1,265178821  | 10,139667 | 3,68E-24  | 4,04E-23    | 9,16E-24   | TRUE |
| Rv1747  | 1596 | 238  | 2,745427173  | 0,746265391  | 10,154945 | 3,15E-24  | 3,47E-23    | 7,87E-24   | TRUE |
| Rv1748  | 88   | 7    | 3,652076697  | 1,652914915  | 4,5121082 | 6,42E-06  | 1,92E-05    | 4,35E-06   | TRUE |
| Rv1749c | 714  | 68   | 3,392317423  | 1,393155641  | 11,33272  | 9,04E-30  | 1,24E-28    | 2,82E-29   | TRUE |
| Rv1750c | 149  | 15   | 3,312277925  | 1,313116143  | 4,9472285 | 7,53E-07  | 2,49E-06    | 5,64E-07   | TRUE |
| Rv1751  | 1256 | 235  | 2,418103802  | 0,41894202   | 5,3521938 | 8,69E-08  | 3,24E-07    | 7,35E-08   | TRUE |
| Rv1753c | 126  | 6    | 4,392317423  | 2,393155641  | 6,8760004 | 6,16E-12  | 3,33E-11    | 7,57E-12   | TRUE |
| Rv1754c | 140  | 4    | 5,129283017  | 3,130121235  | 8,343374  | 7,22E-17  | 5,21E-16    | 1,18E-16   | TRUE |
| Rv1761c | 57   | 3    | 4,247927513  | 2,248765732  | 4,4557841 | 8,36E-06  | 2,45E-05    | 5,56E-06   | TRUE |
| Rv1762c | 122  | 16   | 2,930737338  | 0,931575556  | 3,3929442 | 0,0006915 | 0,001548613 | 0,00035141 | TRUE |
| Rv1765c | 1093 | 184  | 2,57051573   | 0,571353948  | 6,6313894 | 3,33E-11  | 1,71E-10    | 3,87E-11   | TRUE |
| Rv1769  | 437  | 61   | 2,840752132  | 0,84159035   | 5,8928044 | 3,80E-09  | 1,63E-08    | 3,69E-09   | TRUE |
| Rv1772  | 347  | 206  | 0,752291325  | -1,246870456 | -11,17288 | 5,54E-29  | 7,25E-28    | 1,65E-28   | TRUE |
| Rv1775  | 126  | 54   | 1,222392421  | -0,776769361 | -3,865729 | 0,0001108 | 0,000278946 | 6,33E-05   | TRUE |
| Rv1778c | 112  | 10   | 3,485426827  | 1,486265045  | 4,7112567 | 2,46E-06  | 7,74E-06    | 1,76E-06   | TRUE |
| Rv1781c | 73   | 7    | 3,382469637  | 1,383307855  | 3,6037723 | 0,0003136 | 0,000751497 | 0,00017053 | TRUE |
| Rv1793  | 1281 | 448  | 1,515699838  | -0,483461944 | -7,294344 | 3,00E-13  | 1,79E-12    | 4,06E-13   | TRUE |
| Rv1795  | 1516 | 459  | 1,723703695  | -0,275458087 | -4,361339 | 1,29E-05  | 3,71E-05    | 8,41E-06   | TRUE |

|         |      |      |              |              |           |           |             |            |      |
|---------|------|------|--------------|--------------|-----------|-----------|-------------|------------|------|
| Rv1797  | 1843 | 697  | 1,40282551   | -0,596336272 | -11,00758 | 3,51E-28  | 4,47E-27    | 1,01E-27   | TRUE |
| Rv1801  | 137  | 2    | 6,098032083  | 4,098870301  | 9,1376303 | 6,38E-20  | 5,53E-19    | 1,26E-19   | TRUE |
| Rv1802  | 48   | 0    | 6,584962501  | 4,585800719  | 5,5615627 | 2,67E-08  | 1,05E-07    | 2,39E-08   | TRUE |
| Rv1806  | 46   | 2    | 4,523561956  | 2,524400174  | 4,2838592 | 1,84E-05  | 5,16E-05    | 1,17E-05   | TRUE |
| Rv1808  | 264  | 18   | 3,874469118  | 1,875307336  | 8,5317167 | 1,44E-17  | 1,09E-16    | 2,47E-17   | TRUE |
| Rv1813c | 688  | 1038 | -0,593325974 | -2,592487756 | -41,31447 | 0         | 0           | 0          | TRUE |
| Rv1814  | 188  | 18   | 3,38466385   | 1,385502068  | 5,7903783 | 7,02E-09  | 2,95E-08    | 6,70E-09   | TRUE |
| Rv1815  | 758  | 56   | 3,758699116  | 1,759537334  | 13,840187 | 1,46E-43  | 3,09E-42    | 7,02E-43   | TRUE |
| Rv1816  | 679  | 42   | 4,014950341  | 2,01578856   | 14,354716 | 9,95E-47  | 2,26E-45    | 5,12E-46   | TRUE |
| Rv1819c | 169  | 19   | 3,152951923  | 1,153790141  | 4,7591424 | 1,94E-06  | 6,18E-06    | 1,40E-06   | TRUE |
| Rv1821  | 1643 | 350  | 2,230905653  | 0,231743871  | 3,4982594 | 0,0004683 | 0,001089031 | 0,00024712 | TRUE |
| Rv1822  | 139  | 65   | 1,09657326   | -0,902588522 | -4,821956 | 1,42E-06  | 4,63E-06    | 1,05E-06   | TRUE |
| Rv1825  | 208  | 31   | 2,746243408  | 0,747081626  | 3,6683606 | 0,0002441 | 0,000592476 | 0,00013444 | TRUE |
| Rv1826  | 284  | 40   | 2,827819025  | 0,828657243  | 4,687851  | 2,76E-06  | 8,62E-06    | 1,96E-06   | TRUE |
| Rv1828  | 1126 | 170  | 2,727600176  | 0,728438394  | 8,3507739 | 6,78E-17  | 4,92E-16    | 1,12E-16   | TRUE |
| Rv1829  | 207  | 87   | 1,250543462  | -0,74861832  | -4,752193 | 2,01E-06  | 6,38E-06    | 1,45E-06   | TRUE |
| Rv1830  | 950  | 163  | 2,543055549  | 0,543893767  | 5,913137  | 3,36E-09  | 1,45E-08    | 3,29E-09   | TRUE |
| Rv1832  | 1049 | 341  | 1,621171034  | -0,377990748 | -5,066883 | 4,04E-07  | 1,39E-06    | 3,16E-07   | TRUE |
| Rv1835c | 248  | 17   | 3,866733469  | 1,867571687  | 8,2460563 | 1,64E-16  | 1,17E-15    | 2,65E-16   | TRUE |
| Rv1837c | 1188 | 213  | 2,479609501  | 0,480447719  | 5,9060702 | 3,50E-09  | 1,51E-08    | 3,43E-09   | TRUE |
| Rv1842c | 318  | 257  | 0,307258406  | -1,691903376 | -15,67706 | 2,17E-55  | 6,34E-54    | 1,44E-54   | TRUE |
| Rv1843c | 605  | 386  | 0,648334295  | -1,350827487 | -16,27549 | 1,47E-59  | 4,61E-58    | 1,05E-58   | TRUE |
| Rv1845c | 463  | 230  | 1,009378332  | -0,98978345  | -9,798885 | 1,14E-22  | 1,14E-21    | 2,59E-22   | TRUE |
| Rv1846c | 679  | 298  | 1,188099244  | -0,811062538 | -9,427922 | 4,18E-21  | 3,81E-20    | 8,65E-21   | TRUE |
| Rv1847  | 102  | 11   | 3,212993723  | 1,213831941  | 3,8493977 | 0,0001184 | 0,000296887 | 6,74E-05   | TRUE |
| Rv1851  | 13   | 12   | 0,115477217  | -1,883684564 | -3,647708 | 0,0002646 | 0,000640603 | 0,00014537 | TRUE |
| Rv1853  | 25   | 34   | -0,443606651 | -2,442768433 | -7,227231 | 4,93E-13  | 2,89E-12    | 6,56E-13   | TRUE |
| Rv1856c | 331  | 38   | 3,122759893  | 1,123598111  | 6,5203299 | 7,02E-11  | 3,52E-10    | 7,98E-11   | TRUE |
| Rv1857  | 315  | 183  | 0,78350818   | -1,215653602 | -10,32257 | 5,57E-25  | 6,35E-24    | 1,44E-24   | TRUE |
| Rv1859  | 232  | 120  | 0,9510904    | -1,048071382 | -7,418695 | 1,18E-13  | 7,17E-13    | 1,63E-13   | TRUE |
| Rv1862  | 268  | 101  | 1,407877708  | -0,591284074 | -4,156033 | 3,24E-05  | 8,85E-05    | 2,01E-05   | TRUE |
| Rv1863c | 380  | 127  | 1,581170922  | -0,41799086  | -3,39505  | 0,0006862 | 0,001540249 | 0,00034951 | TRUE |
| Rv1865c | 83   | 9    | 3,20511443   | 1,205952648  | 3,4545769 | 0,0005512 | 0,001261981 | 0,00028628 | TRUE |
| Rv1870c | 1937 | 337  | 2,523003457  | 0,523841676  | 8,1624342 | 3,28E-16  | 2,32E-15    | 5,26E-16   | TRUE |
| Rv1871c | 3655 | 1076 | 1,764193328  | -0,234968454 | -5,739956 | 9,47E-09  | 3,92E-08    | 8,90E-09   | TRUE |
| Rv1876  | 413  | 31   | 3,735801661  | 1,736639879  | 10,122636 | 4,38E-24  | 4,78E-23    | 1,08E-23   | TRUE |
| Rv1877  | 474  | 60   | 2,981852653  | 0,982690871  | 6,9930901 | 2,69E-12  | 1,50E-11    | 3,41E-12   | TRUE |

|         |      |     |              |              |           |           |             |            |      |
|---------|------|-----|--------------|--------------|-----------|-----------|-------------|------------|------|
| Rv1882c | 885  | 69  | 3,681009188  | 1,681847406  | 14,488523 | 1,43E-47  | 3,32E-46    | 7,54E-47   | TRUE |
| Rv1883c | 2623 | 255 | 3,362648655  | 1,363486874  | 21,375576 | 2,26E-101 | 1,39E-99    | 3,15E-100  | TRUE |
| Rv1884c | 2280 | 125 | 4,189033824  | 2,189872043  | 27,732634 | 2,82E-169 | 3,59E-167   | 8,15E-168  | TRUE |
| Rv1885c | 402  | 53  | 2,923131237  | 0,923969455  | 6,1171232 | 9,53E-10  | 4,33E-09    | 9,83E-10   | TRUE |
| Rv1886c | 1500 | 178 | 3,075013354  | 1,075851573  | 13,404081 | 5,72E-41  | 1,11E-39    | 2,52E-40   | TRUE |
| Rv1891  | 346  | 34  | 3,347165386  | 1,348003605  | 7,6928021 | 1,44E-14  | 9,28E-14    | 2,11E-14   | TRUE |
| Rv1892  | 145  | 17  | 3,092446249  | 1,093284467  | 4,2211176 | 2,43E-05  | 6,75E-05    | 1,53E-05   | TRUE |
| Rv1893  | 89   | 4   | 4,475733431  | 2,476571649  | 5,8944833 | 3,76E-09  | 1,61E-08    | 3,66E-09   | TRUE |
| Rv1894c | 317  | 37  | 3,098885665  | 1,099723883  | 6,2712428 | 3,58E-10  | 1,70E-09    | 3,85E-10   | TRUE |
| Rv1896c | 126  | 10  | 3,655351829  | 1,656190047  | 5,4067876 | 6,42E-08  | 2,42E-07    | 5,48E-08   | TRUE |
| Rv1899c | 899  | 273 | 1,719420165  | -0,279741617 | -3,41263  | 0,0006434 | 0,001455845 | 0,00033036 | TRUE |
| Rv1900c | 295  | 111 | 1,410155278  | -0,589006504 | -4,341894 | 1,41E-05  | 4,04E-05    | 9,17E-06   | TRUE |
| Rv1905c | 500  | 71  | 2,816037165  | 0,816875383  | 6,1445155 | 8,02E-10  | 3,68E-09    | 8,35E-10   | TRUE |
| Rv1906c | 492  | 54  | 3,187627003  | 1,188465221  | 8,3146617 | 9,20E-17  | 6,61E-16    | 1,50E-16   | TRUE |
| Rv1907c | 101  | 43  | 1,231946728  | -0,767215054 | -3,412783 | 0,000643  | 0,001455864 | 0,00033036 | TRUE |
| Rv1908c | 979  | 599 | 0,708752857  | -1,290408925 | -19,57487 | 2,53E-85  | 1,23E-83    | 2,80E-84   | TRUE |
| Rv1909c | 46   | 32  | 0,523561956  | -1,475599826 | -5,008213 | 5,49E-07  | 1,85E-06    | 4,19E-07   | TRUE |
| Rv1911c | 241  | 86  | 1,486624582  | -0,5125372   | -3,369907 | 0,0007519 | 0,0016755   | 0,0003802  | TRUE |
| Rv1912c | 154  | 18  | 3,096861539  | 1,097699757  | 4,3643811 | 1,27E-05  | 3,66E-05    | 8,30E-06   | TRUE |
| Rv1913  | 60   | 3   | 4,321928095  | 2,322766313  | 4,6618106 | 3,13E-06  | 9,76E-06    | 2,21E-06   | TRUE |
| Rv1917c | 58   | 2   | 4,857980995  | 2,858819213  | 5,1408095 | 2,74E-07  | 9,61E-07    | 2,18E-07   | TRUE |
| Rv1923  | 552  | 73  | 2,918699898  | 0,919538116  | 7,139422  | 9,37E-13  | 5,41E-12    | 1,23E-12   | TRUE |
| Rv1925  | 3718 | 840 | 2,146065537  | 0,146903755  | 3,3872721 | 0,0007059 | 0,001579196 | 0,00035834 | TRUE |
| Rv1926c | 277  | 14  | 4,306387244  | 2,307225462  | 9,9766603 | 1,93E-23  | 2,02E-22    | 4,59E-23   | TRUE |
| Rv1927  | 147  | 156 | -0,085729874 | -2,084891656 | -14,05916 | 6,77E-45  | 1,47E-43    | 3,33E-44   | TRUE |
| Rv1932  | 199  | 147 | 0,436952276  | -1,562209506 | -11,19573 | 4,28E-29  | 5,66E-28    | 1,29E-28   | TRUE |
| Rv1935c | 7    | 10  | -0,514573173 | -2,513734955 | -3,98404  | 6,78E-05  | 0,00017615  | 4,00E-05   | TRUE |
| Rv1937  | 103  | 51  | 1,014075185  | -0,985086597 | -4,595386 | 4,32E-06  | 1,32E-05    | 2,99E-06   | TRUE |
| Rv1947  | 91   | 141 | -0,631756712 | -2,630918494 | -15,34364 | 3,91E-53  | 1,11E-51    | 2,52E-52   | TRUE |
| Rv1950c | 262  | 11  | 4,573991383  | 2,574829601  | 10,337441 | 4,77E-25  | 5,45E-24    | 1,24E-24   | TRUE |
| Rv1952  | 122  | 8   | 3,930737338  | 1,931575556  | 5,915747  | 3,30E-09  | 1,43E-08    | 3,24E-09   | TRUE |
| Rv1957  | 63   | 6   | 3,392317423  | 1,393155641  | 3,36593   | 0,0007629 | 0,001696011 | 0,00038486 | TRUE |
| Rv1958c | 55   | 3   | 4,196397213  | 2,197235431  | 4,3149763 | 1,60E-05  | 4,53E-05    | 1,03E-05   | TRUE |
| Rv1959c | 193  | 29  | 2,734476042  | 0,73531426   | 3,4850431 | 0,0004921 | 0,001141574 | 0,00025905 | TRUE |
| Rv1960c | 75   | 5   | 3,906890596  | 1,907728814  | 4,5999904 | 4,23E-06  | 1,29E-05    | 2,93E-06   | TRUE |
| Rv1962A | 131  | 4   | 5,033423002  | 3,03426122   | 7,9546145 | 1,80E-15  | 1,22E-14    | 2,78E-15   | TRUE |
| Rv1976c | 160  | 68  | 1,234465254  | -0,764696528 | -4,279569 | 1,87E-05  | 5,25E-05    | 1,19E-05   | TRUE |

|         |      |      |              |              |           |           |             |            |      |
|---------|------|------|--------------|--------------|-----------|-----------|-------------|------------|------|
| Rv1979c | 337  | 54   | 2,641717279  | 0,642555497  | 4,0895726 | 4,32E-05  | 0,000115558 | 2,62E-05   | TRUE |
| Rv1980c | 1432 | 139  | 3,364874705  | 1,365712923  | 15,810227 | 2,65E-56  | 7,96E-55    | 1,81E-55   | TRUE |
| Rv1981c | 1430 | 37   | 5,272346066  | 3,273184284  | 27,204457 | 5,75E-163 | 6,67E-161   | 1,51E-161  | TRUE |
| Rv1982c | 139  | 11   | 3,659509454  | 1,660347672  | 5,6890312 | 1,28E-08  | 5,20E-08    | 1,18E-08   | TRUE |
| Rv1984c | 209  | 26   | 3,006919414  | 1,007757632  | 4,7411322 | 2,13E-06  | 6,74E-06    | 1,53E-06   | TRUE |
| Rv1985c | 56   | 5    | 3,485426827  | 1,486265045  | 3,3313294 | 0,0008643 | 0,001904407 | 0,00043215 | TRUE |
| Rv1987  | 563  | 101  | 2,478779629  | 0,479617847  | 4,0587289 | 4,93E-05  | 0,000130341 | 2,96E-05   | TRUE |
| Rv1988  | 52   | 42   | 0,308122295  | -1,691039487 | -6,334411 | 2,38E-10  | 1,13E-09    | 2,58E-10   | TRUE |
| Rv1990c | 297  | 138  | 1,105794664  | -0,893367118 | -6,965738 | 3,27E-12  | 1,81E-11    | 4,11E-12   | TRUE |
| Rv1991A | 104  | 5    | 4,378511623  | 2,379349841  | 6,2257613 | 4,79E-10  | 2,23E-09    | 5,07E-10   | TRUE |
| Rv1991c | 30   | 0    | 5,906890596  | 3,907728814  | 4,2138185 | 2,51E-05  | 6,94E-05    | 1,57E-05   | TRUE |
| Rv1992c | 249  | 38   | 2,712074419  | 0,712912637  | 3,8528669 | 0,0001167 | 0,000293083 | 6,65E-05   | TRUE |
| Rv1993c | 92   | 5    | 4,201633861  | 2,202472079  | 5,5889839 | 2,28E-08  | 9,07E-08    | 2,06E-08   | TRUE |
| Rv1994c | 101  | 9    | 3,488286481  | 1,489124699  | 4,4803011 | 7,45E-06  | 2,20E-05    | 5,00E-06   | TRUE |
| Rv1996  | 566  | 1009 | -0,834052216 | -2,833213998 | -42,6946  | 0         | 0           | 0          | TRUE |
| Rv2000  | 137  | 9    | 3,928107082  | 1,9289453    | 6,2632117 | 3,77E-10  | 1,78E-09    | 4,04E-10   | TRUE |
| Rv2001  | 76   | 4    | 4,247927513  | 2,248765732  | 5,1451092 | 2,67E-07  | 9,41E-07    | 2,13E-07   | TRUE |
| Rv2002  | 178  | 24   | 2,89077093   | 0,891609148  | 3,9498109 | 7,82E-05  | 0,00020188  | 4,58E-05   | TRUE |
| Rv2005c | 572  | 305  | 0,907205904  | -1,091955878 | -12,23098 | 2,12E-34  | 3,43E-33    | 7,79E-34   | TRUE |
| Rv2007c | 3373 | 1231 | 1,454201557  | -0,544960225 | -13,49495 | 1,67E-41  | 3,30E-40    | 7,49E-41   | TRUE |
| Rv2009  | 246  | 7    | 5,135159583  | 3,135997801  | 11,069348 | 1,77E-28  | 2,28E-27    | 5,17E-28   | TRUE |
| Rv2010  | 365  | 35   | 3,382469637  | 1,383307855  | 8,0586995 | 7,71E-16  | 5,35E-15    | 1,21E-15   | TRUE |
| Rv2015c | 1069 | 212  | 2,334125683  | 0,334963901  | 4,005651  | 6,18E-05  | 0,000161753 | 3,67E-05   | TRUE |
| Rv2019  | 89   | 6    | 3,89077093   | 1,891609148  | 4,9825323 | 6,28E-07  | 2,09E-06    | 4,75E-07   | TRUE |
| Rv2020c | 33   | 0    | 6,044394119  | 4,045232337  | 4,4672792 | 7,92E-06  | 2,33E-05    | 5,29E-06   | TRUE |
| Rv2021c | 79   | 7    | 3,496425826  | 1,497264044  | 3,9784434 | 6,94E-05  | 0,000180169 | 4,09E-05   | TRUE |
| Rv2022c | 256  | 36   | 2,830074999  | 0,830913217  | 4,4611099 | 8,15E-06  | 2,39E-05    | 5,43E-06   | TRUE |
| Rv2024c | 403  | 73   | 2,46481147   | 0,465649688  | 3,341849  | 0,0008322 | 0,001837788 | 0,00041703 | TRUE |
| Rv2027c | 200  | 17   | 3,556393349  | 1,557231567  | 6,5157609 | 7,23E-11  | 3,62E-10    | 8,20E-11   | TRUE |
| Rv2028c | 206  | 3    | 6,101538026  | 4,102376245  | 11,207699 | 3,74E-29  | 4,96E-28    | 1,13E-28   | TRUE |
| Rv2029c | 365  | 4    | 6,511752654  | 4,512590872  | 15,284504 | 9,70E-53  | 2,73E-51    | 6,20E-52   | TRUE |
| Rv2030c | 1708 | 355  | 2,266417045  | 0,267255263  | 4,0881589 | 4,35E-05  | 0,000116106 | 2,63E-05   | TRUE |
| Rv2031c | 2583 | 1432 | 0,851016151  | -1,148145631 | -27,61995 | 6,41E-168 | 7,90E-166   | 1,79E-166  | TRUE |
| Rv2032  | 613  | 197  | 1,637691444  | -0,361470338 | -3,692911 | 0,0002217 | 0,000541083 | 0,00012278 | TRUE |
| Rv2035  | 76   | 6    | 3,662965013  | 1,663803231  | 4,2128514 | 2,52E-05  | 6,96E-05    | 1,58E-05   | TRUE |
| Rv2036  | 66   | 2    | 5,044394119  | 3,045232337  | 5,6558048 | 1,55E-08  | 6,26E-08    | 1,42E-08   | TRUE |
| Rv2037c | 233  | 25   | 3,220329955  | 1,221168173  | 5,8458299 | 5,04E-09  | 2,13E-08    | 4,84E-09   | TRUE |



|         |      |      |             |              |           |           |             |            |      |
|---------|------|------|-------------|--------------|-----------|-----------|-------------|------------|------|
| Rv2040c | 81   | 9    | 3,169925001 | 1,17076322   | 3,3333839 | 0,000858  | 0,001891455 | 0,00042921 | TRUE |
| Rv2041c | 113  | 74   | 0,610725597 | -1,388436185 | -7,275351 | 3,46E-13  | 2,05E-12    | 4,64E-13   | TRUE |
| Rv2042c | 160  | 20   | 3           | 1,000838218  | 4,1247074 | 3,71E-05  | 0,000100345 | 2,28E-05   | TRUE |
| Rv2045c | 288  | 215  | 0,421732152 | -1,57742963  | -13,63633 | 2,44E-42  | 4,98E-41    | 1,13E-41   | TRUE |
| Rv2047c | 473  | 159  | 1,572813418 | -0,426348364 | -3,869237 | 0,0001092 | 0,00027549  | 6,25E-05   | TRUE |
| Rv2048c | 8802 | 3554 | 1,30838769  | -0,690774092 | -28,39825 | 2,13E-177 | 2,99E-175   | 6,79E-176  | TRUE |
| Rv2050  | 471  | 84   | 2,487265827 | 0,488104045  | 3,7723747 | 0,0001617 | 0,000399342 | 9,06E-05   | TRUE |
| Rv2052c | 190  | 316  | -0,73392514 | -2,733086922 | -23,44512 | 1,48E-121 | 1,12E-119   | 2,55E-120  | TRUE |
| Rv2053c | 135  | 103  | 0,39031507  | -1,608846712 | -9,573363 | 1,03E-21  | 9,79E-21    | 2,22E-21   | TRUE |
| Rv2057c | 84   | 0    | 7,392317423 | 5,393155641  | 7,5228867 | 5,36E-14  | 3,30E-13    | 7,49E-14   | TRUE |
| Rv2058c | 56   | 1    | 5,807354922 | 3,80819314   | 5,7081512 | 1,14E-08  | 4,69E-08    | 1,06E-08   | TRUE |
| Rv2059  | 166  | 22   | 2,915607813 | 0,916446031  | 3,903753  | 9,47E-05  | 0,00024092  | 5,47E-05   | TRUE |
| Rv2066  | 162  | 112  | 0,532495081 | -1,466666701 | -9,327731 | 1,08E-20  | 9,63E-20    | 2,19E-20   | TRUE |
| Rv2069  | 284  | 25   | 3,50589093  | 1,506729148  | 7,5787656 | 3,49E-14  | 2,20E-13    | 4,99E-14   | TRUE |
| Rv2070c | 63   | 58   | 0,119298928 | -1,879862854 | -8,008682 | 1,16E-15  | 8,01E-15    | 1,82E-15   | TRUE |
| Rv2073c | 37   | 1    | 5,209453366 | 3,210291584  | 4,3383447 | 1,44E-05  | 4,10E-05    | 9,30E-06   | TRUE |
| Rv2077c | 554  | 177  | 1,646136616 | -0,353025166 | -3,423595 | 0,000618  | 0,001403997 | 0,00031859 | TRUE |
| Rv2078  | 63   | 3    | 4,392317423 | 2,393155641  | 4,862028  | 1,16E-06  | 3,80E-06    | 8,62E-07   | TRUE |
| Rv2080  | 171  | 23   | 2,894290559 | 0,895128777  | 3,8842736 | 0,0001026 | 0,000259986 | 5,90E-05   | TRUE |
| Rv2085  | 143  | 12   | 3,574908836 | 1,575747054  | 5,5571716 | 2,74E-08  | 1,08E-07    | 2,45E-08   | TRUE |
| Rv2088  | 155  | 21   | 2,883806982 | 0,884645201  | 3,6614134 | 0,0002508 | 0,000607656 | 0,00013789 | TRUE |
| Rv2092c | 794  | 668  | 0,249290905 | -1,749870877 | -25,88601 | 9,57E-148 | 9,44E-146   | 2,14E-146  | TRUE |
| Rv2094c | 698  | 368  | 0,92352127  | -1,075640512 | -13,27234 | 3,35E-40  | 6,32E-39    | 1,43E-39   | TRUE |
| Rv2097c | 1103 | 94   | 3,552628224 | 1,553466442  | 15,276923 | 1,09E-52  | 3,05E-51    | 6,92E-52   | TRUE |
| Rv2100  | 34   | 1    | 5,087462841 | 3,088301059  | 4,0861889 | 4,39E-05  | 0,000116898 | 2,65E-05   | TRUE |
| Rv2101  | 1226 | 365  | 1,74799061  | -0,251171172 | -3,560907 | 0,0003696 | 0,000876494 | 0,00019889 | TRUE |
| Rv2108  | 92   | 1    | 6,523561956 | 4,524400174  | 7,6778212 | 1,62E-14  | 1,04E-13    | 2,35E-14   | TRUE |
| Rv2110c | 1373 | 267  | 2,362419978 | 0,363258197  | 4,8993669 | 9,61E-07  | 3,15E-06    | 7,15E-07   | TRUE |
| Rv2111c | 409  | 138  | 1,567432576 | -0,431729206 | -3,646692 | 0,0002656 | 0,000642746 | 0,00014585 | TRUE |
| Rv2112c | 917  | 176  | 2,381346305 | 0,382184523  | 4,198283  | 2,69E-05  | 7,40E-05    | 1,68E-05   | TRUE |
| Rv2113  | 67   | 52   | 0,365649472 | -1,63351231  | -6,876767 | 6,12E-12  | 3,32E-11    | 7,54E-12   | TRUE |
| Rv2114  | 282  | 17   | 4,052088511 | 2,052926729  | 9,3603675 | 7,95E-21  | 7,11E-20    | 1,61E-20   | TRUE |
| Rv2115c | 2111 | 909  | 1,215574379 | -0,783587403 | -15,99281 | 1,43E-57  | 4,38E-56    | 9,95E-57   | TRUE |
| Rv2116  | 49   | 1    | 5,614709844 | 3,615548062  | 5,2414631 | 1,59E-07  | 5,75E-07    | 1,30E-07   | TRUE |
| Rv2121c | 115  | 13   | 3,145050333 | 1,145888551  | 3,9042712 | 9,45E-05  | 0,000240715 | 5,46E-05   | TRUE |
| Rv2124c | 1640 | 580  | 1,499571009 | -0,499590772 | -8,5537   | 1,19E-17  | 9,04E-17    | 2,05E-17   | TRUE |
| Rv2127  | 1784 | 212  | 3,072979445 | 1,073817663  | 14,596364 | 2,96E-48  | 7,08E-47    | 1,61E-47   | TRUE |

|         |      |      |              |              |           |           |             |            |      |
|---------|------|------|--------------|--------------|-----------|-----------|-------------|------------|------|
| Rv2128  | 410  | 62   | 2,725283789  | 0,726122007  | 5,0242471 | 5,05E-07  | 1,71E-06    | 3,88E-07   | TRUE |
| Rv2131c | 376  | 138  | 1,446064395  | -0,553097387 | -4,574598 | 4,77E-06  | 1,44E-05    | 3,28E-06   | TRUE |
| Rv2134c | 631  | 251  | 1,329952641  | -0,669209141 | -7,316693 | 2,54E-13  | 1,52E-12    | 3,45E-13   | TRUE |
| Rv2136c | 656  | 107  | 2,616085018  | 0,616923236  | 5,5029672 | 3,73E-08  | 1,44E-07    | 3,27E-08   | TRUE |
| Rv2137c | 3176 | 686  | 2,210930431  | 0,211768649  | 4,4617978 | 8,13E-06  | 2,39E-05    | 5,42E-06   | TRUE |
| Rv2139  | 263  | 29   | 3,180937994  | 1,181776212  | 6,0516409 | 1,43E-09  | 6,44E-09    | 1,46E-09   | TRUE |
| Rv2140c | 162  | 6    | 4,754887502  | 2,75572572   | 8,4311726 | 3,42E-17  | 2,52E-16    | 5,72E-17   | TRUE |
| Rv2142A | 120  | 12   | 3,321928095  | 1,322766313  | 4,464891  | 8,01E-06  | 2,36E-05    | 5,35E-06   | TRUE |
| Rv2142c | 85   | 4    | 4,409390936  | 2,410229154  | 5,6710086 | 1,42E-08  | 5,75E-08    | 1,30E-08   | TRUE |
| Rv2143  | 157  | 65   | 1,272252936  | -0,726908846 | -4,003466 | 6,24E-05  | 0,000163147 | 3,70E-05   | TRUE |
| Rv2144c | 2191 | 279  | 2,973252457  | 0,974090675  | 14,930841 | 2,08E-50  | 5,39E-49    | 1,22E-49   | TRUE |
| Rv2145c | 1075 | 212  | 2,34220049   | 0,343038708  | 4,1079604 | 3,99E-05  | 0,000107316 | 2,44E-05   | TRUE |
| Rv2147c | 1041 | 110  | 3,24239464   | 1,243232858  | 12,533593 | 4,89E-36  | 8,42E-35    | 1,90E-35   | TRUE |
| Rv2151c | 460  | 79   | 2,541709303  | 0,542547521  | 4,1049637 | 4,04E-05  | 0,000108642 | 2,47E-05   | TRUE |
| Rv2153c | 204  | 81   | 1,332575339  | -0,666586443 | -4,14138  | 3,45E-05  | 9,40E-05    | 2,13E-05   | TRUE |
| Rv2155c | 241  | 92   | 1,38932738   | -0,609834402 | -4,07782  | 4,55E-05  | 0,000120737 | 2,74E-05   | TRUE |
| Rv2156c | 533  | 234  | 1,187627003  | -0,811534779 | -8,358125 | 6,37E-17  | 4,65E-16    | 1,05E-16   | TRUE |
| Rv2158c | 540  | 346  | 0,642187369  | -1,356974412 | -15,46233 | 6,23E-54  | 1,79E-52    | 4,07E-53   | TRUE |
| Rv2159c | 520  | 554  | -0,091374353 | -2,090536135 | -26,54592 | 2,86E-155 | 3,23E-153   | 7,32E-154  | TRUE |
| Rv2160A | 425  | 1153 | -1,439857767 | -3,439019549 | -49,87604 | 0         | 0           | 0          | TRUE |
| Rv2161c | 1220 | 834  | 0,548761859  | -1,450399923 | -25,25511 | 9,95E-141 | 9,13E-139   | 2,07E-139  | TRUE |
| Rv2163c | 1023 | 87   | 3,555646934  | 1,556485152  | 14,733161 | 3,95E-49  | 9,85E-48    | 2,24E-48   | TRUE |
| Rv2164c | 210  | 18   | 3,544320516  | 1,545158734  | 6,6387919 | 3,16E-11  | 1,62E-10    | 3,69E-11   | TRUE |
| Rv2165c | 514  | 47   | 3,451035698  | 1,451873916  | 9,9188345 | 3,45E-23  | 3,58E-22    | 8,12E-23   | TRUE |
| Rv2166c | 529  | 20   | 4,725195817  | 2,726034035  | 15,14977  | 7,60E-52  | 2,07E-50    | 4,69E-51   | TRUE |
| Rv2171  | 133  | 8    | 4,055282436  | 2,056120654  | 6,4345738 | 1,24E-10  | 6,07E-10    | 1,38E-10   | TRUE |
| Rv2176  | 164  | 15   | 3,450661409  | 1,451499627  | 5,6013245 | 2,13E-08  | 8,48E-08    | 1,92E-08   | TRUE |
| Rv2178c | 1543 | 172  | 3,165257592  | 1,16609581   | 14,506556 | 1,10E-47  | 2,59E-46    | 5,87E-47   | TRUE |
| Rv2180c | 66   | 6    | 3,459431619  | 1,460269837  | 3,5693531 | 0,0003579 | 0,000851019 | 0,00019305 | TRUE |
| Rv2184c | 742  | 258  | 1,524048121  | -0,475113661 | -5,446788 | 5,13E-08  | 1,94E-07    | 4,41E-08   | TRUE |
| Rv2185c | 943  | 147  | 2,681441616  | 0,682279834  | 7,21507   | 5,39E-13  | 3,15E-12    | 7,16E-13   | TRUE |
| Rv2187  | 664  | 70   | 3,245756414  | 1,246594633  | 10,030517 | 1,12E-23  | 1,19E-22    | 2,71E-23   | TRUE |
| Rv2189c | 320  | 52   | 2,621488377  | 0,622326595  | 3,8731702 | 0,0001074 | 0,000271428 | 6,16E-05   | TRUE |
| Rv2190c | 2928 | 271  | 3,433550797  | 1,434389015  | 23,46943  | 8,37E-122 | 6,48E-120   | 1,47E-120  | TRUE |
| Rv2191  | 50   | 34   | 0,556393349  | -1,442768433 | -5,076294 | 3,85E-07  | 1,33E-06    | 3,01E-07   | TRUE |
| Rv2193  | 1691 | 263  | 2,684741955  | 0,685580173  | 9,704598  | 2,88E-22  | 2,81E-21    | 6,37E-22   | TRUE |
| Rv2194  | 2244 | 301  | 2,898237284  | 0,899075502  | 14,129499 | 2,50E-45  | 5,48E-44    | 1,24E-44   | TRUE |

|         |      |     |              |              |           |           |             |            |      |
|---------|------|-----|--------------|--------------|-----------|-----------|-------------|------------|------|
| Rv2195  | 3603 | 655 | 2,45963184   | 0,460470058  | 9,8978286 | 4,25E-23  | 4,39E-22    | 9,97E-23   | TRUE |
| Rv2196  | 4770 | 921 | 2,372716205  | 0,373554423  | 9,3821162 | 6,47E-21  | 5,82E-20    | 1,32E-20   | TRUE |
| Rv2197c | 376  | 135 | 1,477773255  | -0,521388527 | -4,288702 | 1,80E-05  | 5,06E-05    | 1,15E-05   | TRUE |
| Rv2198c | 2097 | 173 | 3,599482918  | 1,600321137  | 21,527648 | 8,58E-103 | 5,55E-101   | 1,26E-101  | TRUE |
| Rv2199c | 464  | 67  | 2,791891805  | 0,792730023  | 5,7682653 | 8,01E-09  | 3,34E-08    | 7,57E-09   | TRUE |
| Rv2200c | 1883 | 567 | 1,73161236   | -0,267549422 | -4,715183 | 2,41E-06  | 7,61E-06    | 1,73E-06   | TRUE |
| Rv2202c | 475  | 157 | 1,597162954  | -0,401998828 | -3,640567 | 0,000272  | 0,000657426 | 0,00014918 | TRUE |
| Rv2203  | 212  | 10  | 4,40599236   | 2,406830578  | 8,9488788 | 3,59E-19  | 2,96E-18    | 6,71E-19   | TRUE |
| Rv2204c | 1348 | 792 | 0,767248161  | -1,231913621 | -21,71052 | 1,63E-104 | 1,09E-102   | 2,48E-103  | TRUE |
| Rv2206  | 146  | 71  | 1,040077439  | -0,959084343 | -5,302891 | 1,14E-07  | 4,16E-07    | 9,45E-08   | TRUE |
| Rv2209  | 168  | 78  | 1,106915204  | -0,892246578 | -5,231089 | 1,69E-07  | 6,06E-07    | 1,38E-07   | TRUE |
| Rv2210c | 351  | 57  | 2,622437206  | 0,623275424  | 4,0619867 | 4,87E-05  | 0,000128707 | 2,92E-05   | TRUE |
| Rv2213  | 414  | 68  | 2,606024116  | 0,606862334  | 4,307617  | 1,65E-05  | 4,67E-05    | 1,06E-05   | TRUE |
| Rv2214c | 909  | 114 | 2,99524647   | 0,996084688  | 9,7942592 | 1,19E-22  | 1,19E-21    | 2,71E-22   | TRUE |
| Rv2218  | 525  | 86  | 2,609908858  | 0,610747076  | 4,878728  | 1,07E-06  | 3,50E-06    | 7,94E-07   | TRUE |
| Rv2219  | 710  | 221 | 1,683772655  | -0,315389127 | -3,440219 | 0,0005812 | 0,001325101 | 0,00030069 | TRUE |
| Rv2220  | 1409 | 867 | 0,700567713  | -1,298594069 | -23,67065 | 7,24E-124 | 5,94E-122   | 1,35E-122  | TRUE |
| Rv2222c | 2043 | 315 | 2,69726547   | 0,698103688  | 10,839094 | 2,25E-27  | 2,78E-26    | 6,30E-27   | TRUE |
| Rv2226  | 329  | 46  | 2,838381818  | 0,839220036  | 5,1006165 | 3,39E-07  | 1,18E-06    | 2,67E-07   | TRUE |
| Rv2227  | 36   | 1   | 5,169925001  | 3,17076322   | 4,2556761 | 2,08E-05  | 5,83E-05    | 1,32E-05   | TRUE |
| Rv2228c | 395  | 142 | 1,475961724  | -0,523200058 | -4,412411 | 1,02E-05  | 2,98E-05    | 6,75E-06   | TRUE |
| Rv2229c | 355  | 160 | 1,14974712   | -0,849414662 | -7,186113 | 6,67E-13  | 3,88E-12    | 8,81E-13   | TRUE |
| Rv2236c | 24   | 43  | -0,841302254 | -2,840464036 | -8,82155  | 1,13E-18  | 9,05E-18    | 2,05E-18   | TRUE |
| Rv2238c | 471  | 70  | 2,750300233  | 0,751138451  | 5,5465479 | 2,91E-08  | 1,14E-07    | 2,60E-08   | TRUE |
| Rv2239c | 900  | 181 | 2,313935304  | 0,314773522  | 3,4658283 | 0,0005286 | 0,001216337 | 0,00027601 | TRUE |
| Rv2240c | 132  | 73  | 0,85456956   | -1,144592221 | -6,214085 | 5,16E-10  | 2,40E-09    | 5,45E-10   | TRUE |
| Rv2243  | 530  | 15  | 5,142957954  | 3,143796172  | 16,266574 | 1,70E-59  | 5,29E-58    | 1,20E-58   | TRUE |
| Rv2244  | 3464 | 191 | 4,180794387  | 2,181632605  | 34,108731 | 5,48E-255 | 1,14E-252   | 2,58E-253  | TRUE |
| Rv2245  | 4969 | 648 | 2,938889824  | 0,939728042  | 21,834338 | 1,10E-105 | 7,45E-104   | 1,69E-104  | TRUE |
| Rv2246  | 1967 | 296 | 2,732327877  | 0,733166095  | 11,101839 | 1,23E-28  | 1,59E-27    | 3,62E-28   | TRUE |
| Rv2247  | 1111 | 439 | 1,339565972  | -0,65959581  | -9,554872 | 1,24E-21  | 1,16E-20    | 2,63E-21   | TRUE |
| Rv2248  | 209  | 22  | 3,247927513  | 1,248765732  | 5,6346611 | 1,75E-08  | 7,04E-08    | 1,60E-08   | TRUE |
| Rv2253  | 27   | 1   | 4,754887502  | 2,75572572   | 3,4419603 | 0,0005775 | 0,001317362 | 0,00029893 | TRUE |
| Rv2254c | 68   | 3   | 4,502500341  | 2,503338559  | 5,1839205 | 2,17E-07  | 7,72E-07    | 1,75E-07   | TRUE |
| Rv2258c | 620  | 446 | 0,475224505  | -1,523937277 | -19,15393 | 8,98E-82  | 4,26E-80    | 9,68E-81   | TRUE |
| Rv2259  | 407  | 165 | 1,30256277   | -0,696599012 | -6,145325 | 7,98E-10  | 3,66E-09    | 8,31E-10   | TRUE |
| Rv2262c | 109  | 53  | 1,04026387   | -0,958897912 | -4,580834 | 4,63E-06  | 1,41E-05    | 3,19E-06   | TRUE |

|         |      |     |              |              |           |           |             |            |      |
|---------|------|-----|--------------|--------------|-----------|-----------|-------------|------------|------|
| Rv2267c | 46   | 2   | 4,523561956  | 2,524400174  | 4,2838592 | 1,84E-05  | 5,16E-05    | 1,17E-05   | TRUE |
| Rv2271  | 101  | 6   | 4,073248982  | 2,0740872    | 5,6386995 | 1,71E-08  | 6,89E-08    | 1,56E-08   | TRUE |
| Rv2274c | 26   | 1   | 4,700439718  | 2,701277936  | 3,3422698 | 0,000831  | 0,001836031 | 0,00041663 | TRUE |
| Rv2275  | 405  | 61  | 2,73104076   | 0,731878978  | 5,0280828 | 4,95E-07  | 1,68E-06    | 3,81E-07   | TRUE |
| Rv2276  | 291  | 20  | 3,862947248  | 1,863785466  | 8,920175  | 4,66E-19  | 3,79E-18    | 8,61E-19   | TRUE |
| Rv2285  | 179  | 24  | 2,898853277  | 0,899691495  | 3,9912019 | 6,57E-05  | 0,000171139 | 3,88E-05   | TRUE |
| Rv2286c | 137  | 13  | 3,397592365  | 1,398430583  | 4,9778875 | 6,43E-07  | 2,13E-06    | 4,84E-07   | TRUE |
| Rv2290  | 456  | 78  | 2,547487795  | 0,548326013  | 4,1264682 | 3,68E-05  | 9,98E-05    | 2,26E-05   | TRUE |
| Rv2294  | 131  | 8   | 4,033423002  | 2,03426122   | 6,3420953 | 2,27E-10  | 1,08E-09    | 2,45E-10   | TRUE |
| Rv2295  | 727  | 85  | 3,096420618  | 1,097258836  | 9,4806305 | 2,53E-21  | 2,33E-20    | 5,29E-21   | TRUE |
| Rv2299c | 891  | 131 | 2,76585862   | 0,766696838  | 7,766476  | 8,07E-15  | 5,25E-14    | 1,19E-14   | TRUE |
| Rv2304c | 40   | 27  | 0,567040593  | -1,432121189 | -4,49854  | 6,84E-06  | 2,03E-05    | 4,61E-06   | TRUE |
| Rv2306B | 1    | 6   | -2,584962501 | -4,584124283 | -3,931176 | 8,45E-05  | 0,000217052 | 4,93E-05   | TRUE |
| Rv2307c | 123  | 13  | 3,242074787  | 1,242913005  | 4,3066589 | 1,66E-05  | 4,69E-05    | 1,06E-05   | TRUE |
| Rv2307D | 86   | 3   | 4,841302254  | 2,842140472  | 6,2414013 | 4,34E-10  | 2,03E-09    | 4,60E-10   | TRUE |
| Rv2309c | 169  | 14  | 3,593524514  | 1,594362732  | 6,092992  | 1,11E-09  | 5,03E-09    | 1,14E-09   | TRUE |
| Rv2314c | 723  | 125 | 2,532067552  | 0,53290577   | 5,0636691 | 4,11E-07  | 1,41E-06    | 3,21E-07   | TRUE |
| Rv2315c | 444  | 72  | 2,624490865  | 0,625329083  | 4,5820501 | 4,60E-06  | 1,40E-05    | 3,17E-06   | TRUE |
| Rv2317  | 52   | 4   | 3,700439718  | 1,701277936  | 3,5401555 | 0,0003999 | 0,000940472 | 0,00021341 | TRUE |
| Rv2322c | 43   | 2   | 4,426264755  | 2,427102973  | 4,0498856 | 5,12E-05  | 0,000135185 | 3,07E-05   | TRUE |
| Rv2325c | 255  | 96  | 1,409390936  | -0,589770846 | -4,042527 | 5,29E-05  | 0,000139313 | 3,16E-05   | TRUE |
| Rv2326c | 1727 | 584 | 1,564227809  | -0,434933973 | -7,556637 | 4,14E-14  | 2,59E-13    | 5,87E-14   | TRUE |
| Rv2327  | 180  | 86  | 1,065588342  | -0,93357344  | -5,706239 | 1,15E-08  | 4,73E-08    | 1,07E-08   | TRUE |
| Rv2329c | 1188 | 225 | 2,40053793   | 0,401376148  | 5,0021678 | 5,67E-07  | 1,90E-06    | 4,32E-07   | TRUE |
| Rv2330c | 33   | 1   | 5,044394119  | 3,045232337  | 3,9992447 | 6,35E-05  | 0,000165865 | 3,76E-05   | TRUE |
| Rv2331  | 618  | 54  | 3,516575526  | 1,517413744  | 11,238876 | 2,63E-29  | 3,50E-28    | 7,94E-29   | TRUE |
| Rv2333c | 275  | 117 | 1,232923089  | -0,766238693 | -5,623623 | 1,87E-08  | 7,48E-08    | 1,70E-08   | TRUE |
| Rv2337c | 283  | 47  | 2,590069391  | 0,590907609  | 3,4773398 | 0,0005064 | 0,001172126 | 0,00026598 | TRUE |
| Rv2338c | 675  | 77  | 3,131957151  | 1,132795369  | 9,3731321 | 7,04E-21  | 6,31E-20    | 1,43E-20   | TRUE |
| Rv2339  | 548  | 55  | 3,316672369  | 1,317510588  | 9,5128571 | 1,85E-21  | 1,72E-20    | 3,91E-21   | TRUE |
| Rv2342  | 111  | 115 | -0,051074185 | -2,050235966 | -11,94167 | 7,18E-33  | 1,11E-31    | 2,51E-32   | TRUE |
| Rv2345  | 315  | 47  | 2,744619167  | 0,745457385  | 4,5059149 | 6,61E-06  | 1,97E-05    | 4,46E-06   | TRUE |
| Rv2346c | 883  | 149 | 2,567101107  | 0,567939325  | 5,9279842 | 3,07E-09  | 1,34E-08    | 3,03E-09   | TRUE |
| Rv2347c | 557  | 81  | 2,781683514  | 0,782521733  | 6,2497438 | 4,11E-10  | 1,93E-09    | 4,39E-10   | TRUE |
| Rv2349c | 279  | 37  | 2,914667946  | 0,915506164  | 5,0566837 | 4,27E-07  | 1,46E-06    | 3,31E-07   | TRUE |
| Rv2350c | 379  | 39  | 3,280651819  | 1,281490037  | 7,742821  | 9,72E-15  | 6,32E-14    | 1,43E-14   | TRUE |
| Rv2351c | 92   | 7   | 3,716207034  | 1,717045252  | 4,7395508 | 2,14E-06  | 6,79E-06    | 1,54E-06   | TRUE |

|         |      |      |              |              |           |           |             |            |      |
|---------|------|------|--------------|--------------|-----------|-----------|-------------|------------|------|
| Rv2352c | 2152 | 740  | 1,540080902  | -0,45908088  | -8,942339 | 3,81E-19  | 3,12E-18    | 7,09E-19   | TRUE |
| Rv2356c | 2359 | 149  | 3,984791183  | 1,985629401  | 26,500416 | 9,59E-155 | 1,05E-152   | 2,38E-153  | TRUE |
| Rv2357c | 492  | 44   | 3,483082887  | 1,483921105  | 9,8634689 | 5,99E-23  | 6,11E-22    | 1,39E-22   | TRUE |
| Rv2361c | 230  | 37   | 2,636036685  | 0,636874903  | 3,3518704 | 0,0008027 | 0,001779513 | 0,00040381 | TRUE |
| Rv2368c | 908  | 147  | 2,626876142  | 0,627714361  | 6,5755468 | 4,85E-11  | 2,45E-10    | 5,57E-11   | TRUE |
| Rv2369c | 156  | 63   | 1,308122295  | -0,691039487 | -3,770262 | 0,0001631 | 0,000402234 | 9,13E-05   | TRUE |
| Rv2370c | 117  | 6    | 4,285402219  | 2,286240437  | 6,4482287 | 1,13E-10  | 5,57E-10    | 1,26E-10   | TRUE |
| Rv2372c | 213  | 89   | 1,258976189  | -0,740185593 | -4,759322 | 1,94E-06  | 6,18E-06    | 1,40E-06   | TRUE |
| Rv2373c | 912  | 297  | 1,618570893  | -0,380590889 | -4,758872 | 1,95E-06  | 6,19E-06    | 1,40E-06   | TRUE |
| Rv2375  | 25   | 16   | 0,64385619   | -1,355305592 | -3,321122 | 0,0008966 | 0,001972138 | 0,00044752 | TRUE |
| Rv2376c | 793  | 305  | 1,378511623  | -0,620650159 | -7,543811 | 4,56E-14  | 2,83E-13    | 6,42E-14   | TRUE |
| Rv2378c | 71   | 4    | 4,14974712   | 2,150585338  | 4,837468  | 1,32E-06  | 4,29E-06    | 9,73E-07   | TRUE |
| Rv2380c | 320  | 45   | 2,830074999  | 0,830913217  | 4,9877414 | 6,11E-07  | 2,04E-06    | 4,63E-07   | TRUE |
| Rv2382c | 71   | 182  | -1,358047521 | -3,357209303 | -19,61403 | 1,17E-85  | 5,79E-84    | 1,31E-84   | TRUE |
| Rv2386c | 56   | 4    | 3,807354922  | 1,80819314   | 3,8329945 | 0,0001266 | 0,000316001 | 7,17E-05   | TRUE |
| Rv2388c | 215  | 98   | 1,133483005  | -0,865678776 | -5,715271 | 1,10E-08  | 4,50E-08    | 1,02E-08   | TRUE |
| Rv2389c | 128  | 71   | 0,85025288   | -1,148908901 | -6,146872 | 7,90E-10  | 3,63E-09    | 8,24E-10   | TRUE |
| Rv2391  | 2327 | 745  | 1,64315888   | -0,356002902 | -7,083515 | 1,41E-12  | 8,03E-12    | 1,82E-12   | TRUE |
| Rv2392  | 541  | 238  | 1,184667021  | -0,814494761 | -8,455693 | 2,77E-17  | 2,06E-16    | 4,67E-17   | TRUE |
| Rv2393  | 635  | 496  | 0,356416471  | -1,642745311 | -21,33055 | 5,91E-101 | 3,59E-99    | 8,14E-100  | TRUE |
| Rv2394  | 668  | 303  | 1,140530309  | -0,858631473 | -9,981636 | 1,83E-23  | 1,93E-22    | 4,38E-23   | TRUE |
| Rv2395A | 1472 | 1377 | 0,096249112  | -1,90291267  | -39,37434 | 0         | 0           | 0          | TRUE |
| Rv2396  | 409  | 137  | 1,57792495   | -0,421236832 | -3,551601 | 0,0003829 | 0,000904275 | 0,0002052  | TRUE |
| Rv2400c | 175  | 26   | 2,750771394  | 0,751609612  | 3,3825145 | 0,0007183 | 0,001604075 | 0,000364   | TRUE |
| Rv2403c | 299  | 119  | 1,329183911  | -0,669977871 | -5,042429 | 4,60E-07  | 1,56E-06    | 3,55E-07   | TRUE |
| Rv2405  | 122  | 64   | 0,930737338  | -1,068424444 | -5,503367 | 3,73E-08  | 1,44E-07    | 3,27E-08   | TRUE |
| Rv2409c | 421  | 147  | 1,518004078  | -0,481157704 | -4,158887 | 3,20E-05  | 8,75E-05    | 1,98E-05   | TRUE |
| Rv2411c | 582  | 108  | 2,429987841  | 0,430826059  | 3,7383416 | 0,0001852 | 0,00045519  | 0,00010329 | TRUE |
| Rv2412  | 277  | 10   | 4,791814071  | 2,792652289  | 11,101396 | 1,23E-28  | 1,60E-27    | 3,62E-28   | TRUE |
| Rv2414c | 318  | 161  | 0,981966077  | -1,017195705 | -8,384979 | 5,07E-17  | 3,71E-16    | 8,42E-17   | TRUE |
| Rv2420c | 255  | 10   | 4,672425342  | 2,67326356   | 10,409193 | 2,25E-25  | 2,60E-24    | 5,89E-25   | TRUE |
| Rv2421c | 1238 | 195  | 2,666465285  | 0,667303504  | 8,1070481 | 5,19E-16  | 3,64E-15    | 8,26E-16   | TRUE |
| Rv2427c | 990  | 161  | 2,620367837  | 0,621206055  | 6,8026549 | 1,03E-11  | 5,47E-11    | 1,24E-11   | TRUE |
| Rv2430c | 948  | 76   | 3,640815735  | 1,641653954  | 14,73947  | 3,60E-49  | 9,03E-48    | 2,05E-48   | TRUE |
| Rv2431c | 287  | 18   | 3,994981925  | 1,995820143  | 9,2716196 | 1,83E-20  | 1,62E-19    | 3,67E-20   | TRUE |
| Rv2434c | 75   | 35   | 1,099535674  | -0,899626108 | -3,528457 | 0,000418  | 0,000979532 | 0,00022227 | TRUE |
| Rv2437  | 31   | 0    | 5,95419631   | 3,955034529  | 4,2999342 | 1,71E-05  | 4,82E-05    | 1,09E-05   | TRUE |

|         |      |      |              |              |           |           |             |            |      |
|---------|------|------|--------------|--------------|-----------|-----------|-------------|------------|------|
| Rv2439c | 87   | 175  | -1,008267616 | -3,007429398 | -18,30599 | 7,41E-75  | 3,01E-73    | 6,84E-74   | TRUE |
| Rv2440c | 1072 | 460  | 1,22059914   | -0,778562642 | -11,30928 | 1,18E-29  | 1,61E-28    | 3,64E-29   | TRUE |
| Rv2441c | 1436 | 148  | 3,278386668  | 1,279224886  | 15,053722 | 3,26E-51  | 8,64E-50    | 1,96E-50   | TRUE |
| Rv2442c | 1491 | 245  | 2,605426603  | 0,606264821  | 8,1696251 | 3,09E-16  | 2,19E-15    | 4,96E-16   | TRUE |
| Rv2448c | 1558 | 214  | 2,864012532  | 0,86485075   | 11,390913 | 4,64E-30  | 6,45E-29    | 1,46E-29   | TRUE |
| Rv2452c | 137  | 1    | 7,098032083  | 5,098870301  | 9,5583881 | 1,20E-21  | 1,13E-20    | 2,55E-21   | TRUE |
| Rv2455c | 2317 | 379  | 2,611988291  | 0,612826509  | 10,284684 | 8,26E-25  | 9,34E-24    | 2,12E-24   | TRUE |
| Rv2457c | 3220 | 1152 | 1,482919972  | -0,51624181  | -12,42768 | 1,85E-35  | 3,09E-34    | 7,01E-35   | TRUE |
| Rv2459  | 473  | 82   | 2,528144369  | 0,528982587  | 4,0680568 | 4,74E-05  | 0,000125569 | 2,85E-05   | TRUE |
| Rv2460c | 1179 | 243  | 2,278535499  | 0,279373717  | 3,5426405 | 0,0003961 | 0,000933882 | 0,00021192 | TRUE |
| Rv2462c | 1325 | 263  | 2,332857655  | 0,333695873  | 4,4439488 | 8,83E-06  | 2,58E-05    | 5,86E-06   | TRUE |
| Rv2464c | 163  | 20   | 3,026800059  | 1,027638277  | 4,2548728 | 2,09E-05  | 5,84E-05    | 1,32E-05   | TRUE |
| Rv2466c | 80   | 1    | 6,321928095  | 4,322766313  | 7,0837646 | 1,40E-12  | 8,03E-12    | 1,82E-12   | TRUE |
| Rv2467  | 810  | 111  | 2,867362231  | 0,86820045   | 8,2390024 | 1,74E-16  | 1,24E-15    | 2,81E-16   | TRUE |
| Rv2469c | 98   | 54   | 0,859822342  | -1,13933944  | -5,324807 | 1,01E-07  | 3,73E-07    | 8,45E-08   | TRUE |
| Rv2470  | 209  | 22   | 3,247927513  | 1,248765732  | 5,6346611 | 1,75E-08  | 7,04E-08    | 1,60E-08   | TRUE |
| Rv2472  | 34   | 37   | -0,121990524 | -2,121152306 | -6,921951 | 4,45E-12  | 2,44E-11    | 5,54E-12   | TRUE |
| Rv2473  | 51   | 35   | 0,543142325  | -1,456019457 | -5,18579  | 2,15E-07  | 7,65E-07    | 1,74E-07   | TRUE |
| Rv2476c | 3033 | 598  | 2,342528108  | 0,343366327  | 6,9098048 | 4,85E-12  | 2,65E-11    | 6,01E-12   | TRUE |
| Rv2477c | 2579 | 322  | 3,00167918   | 1,002517398  | 16,591069 | 8,09E-62  | 2,68E-60    | 6,08E-61   | TRUE |
| Rv2480c | 23   | 0    | 5,523561956  | 3,524400174  | 3,5562161 | 0,0003762 | 0,000891213 | 0,00020223 | TRUE |
| Rv2482c | 620  | 202  | 1,617912923  | -0,381248859 | -3,930615 | 8,47E-05  | 0,000217418 | 4,93E-05   | TRUE |
| Rv2485c | 181  | 87   | 1,056902391  | -0,942259391 | -5,784009 | 7,29E-09  | 3,06E-08    | 6,94E-09   | TRUE |
| Rv2486  | 69   | 7    | 3,301169535  | 1,302007753  | 3,3445175 | 0,0008243 | 0,001823772 | 0,00041359 | TRUE |
| Rv2487c | 141  | 17   | 3,052088511  | 1,052926729  | 4,0369654 | 5,41E-05  | 0,000142276 | 3,23E-05   | TRUE |
| Rv2496c | 925  | 280  | 1,724026538  | -0,275135243 | -3,401936 | 0,0006691 | 0,001507108 | 0,00034199 | TRUE |
| Rv2497c | 745  | 125  | 2,575312331  | 0,576150549  | 5,5157745 | 3,47E-08  | 1,35E-07    | 3,06E-08   | TRUE |
| Rv2498c | 187  | 80   | 1,224966365  | -0,774195417 | -4,691824 | 2,71E-06  | 8,47E-06    | 1,92E-06   | TRUE |
| Rv2499c | 189  | 21   | 3,169925001  | 1,17076322   | 5,0919335 | 3,54E-07  | 1,23E-06    | 2,79E-07   | TRUE |
| Rv2500c | 1778 | 231  | 2,944290567  | 0,945128786  | 13,114897 | 2,71E-39  | 5,06E-38    | 1,15E-38   | TRUE |
| Rv2501c | 695  | 109  | 2,672684843  | 0,673523061  | 6,1235288 | 9,15E-10  | 4,18E-09    | 9,48E-10   | TRUE |
| Rv2503c | 480  | 68   | 2,819427754  | 0,820265972  | 6,0417819 | 1,52E-09  | 6,83E-09    | 1,55E-09   | TRUE |
| Rv2504c | 506  | 65   | 2,960625762  | 0,96146398   | 7,0953197 | 1,29E-12  | 7,40E-12    | 1,68E-12   | TRUE |
| Rv2505c | 278  | 13   | 4,418501355  | 2,419339573  | 10,278661 | 8,79E-25  | 9,91E-24    | 2,25E-24   | TRUE |
| Rv2507  | 386  | 66   | 2,548062918  | 0,548901136  | 3,8000953 | 0,0001446 | 0,000359007 | 8,15E-05   | TRUE |
| Rv2510c | 199  | 30   | 2,729734025  | 0,730572243  | 3,5188739 | 0,0004334 | 0,001013196 | 0,00022991 | TRUE |
| Rv2513  | 102  | 12   | 3,087462841  | 1,088301059  | 3,5272057 | 0,00042   | 0,000983589 | 0,0002232  | TRUE |

|         |      |      |              |              |           |           |             |            |      |
|---------|------|------|--------------|--------------|-----------|-----------|-------------|------------|------|
| Rv2514c | 36   | 2    | 4,169925001  | 2,17076322   | 3,4647773 | 0,0005307 | 0,001218966 | 0,00027645 | TRUE |
| Rv2518c | 391  | 55   | 2,829665084  | 0,830503302  | 5,5111284 | 3,57E-08  | 1,38E-07    | 3,13E-08   | TRUE |
| Rv2519  | 499  | 69   | 2,854371549  | 0,855209767  | 6,3838709 | 1,73E-10  | 8,41E-10    | 1,91E-10   | TRUE |
| Rv2520c | 105  | 7    | 3,906890596  | 1,907728814  | 5,4428063 | 5,24E-08  | 1,99E-07    | 4,51E-08   | TRUE |
| Rv2521  | 320  | 126  | 1,344648171  | -0,65451361  | -5,082491 | 3,73E-07  | 1,29E-06    | 2,92E-07   | TRUE |
| Rv2522c | 161  | 99   | 0,701560258  | -1,297601524 | -7,98943  | 1,36E-15  | 9,33E-15    | 2,12E-15   | TRUE |
| Rv2524c | 3472 | 648  | 2,42170123   | 0,422539448  | 8,9744739 | 2,85E-19  | 2,37E-18    | 5,39E-19   | TRUE |
| Rv2525c | 423  | 35   | 3,595230836  | 1,596069054  | 9,6474345 | 5,04E-22  | 4,85E-21    | 1,10E-21   | TRUE |
| Rv2527  | 86   | 3    | 4,841302254  | 2,842140472  | 6,2414013 | 4,34E-10  | 2,03E-09    | 4,60E-10   | TRUE |
| Rv2530A | 428  | 44   | 3,282035368  | 1,282873586  | 8,2351198 | 1,79E-16  | 1,28E-15    | 2,90E-16   | TRUE |
| Rv2530c | 69   | 6    | 3,523561956  | 1,524400174  | 3,7677475 | 0,0001647 | 0,000406053 | 9,21E-05   | TRUE |
| Rv2532c | 72   | 6    | 3,584962501  | 1,585800719  | 3,9614335 | 7,45E-05  | 0,000193057 | 4,38E-05   | TRUE |
| Rv2533c | 142  | 69   | 1,041222663  | -0,957939119 | -5,222454 | 1,77E-07  | 6,33E-07    | 1,44E-07   | TRUE |
| Rv2534c | 268  | 34   | 2,978626349  | 0,979464567  | 5,2437703 | 1,57E-07  | 5,68E-07    | 1,29E-07   | TRUE |
| Rv2540c | 319  | 146  | 1,127588055  | -0,871573727 | -7,016518 | 2,27E-12  | 1,28E-11    | 2,91E-12   | TRUE |
| Rv2542  | 79   | 179  | -1,180035029 | -3,179196811 | -18,99743 | 1,79E-80  | 8,41E-79    | 1,91E-79   | TRUE |
| Rv2548  | 111  | 4    | 4,794415866  | 2,795254084  | 7,0307221 | 2,05E-12  | 1,16E-11    | 2,63E-12   | TRUE |
| Rv2548A | 529  | 49   | 3,432414068  | 1,433252286  | 9,9656005 | 2,16E-23  | 2,26E-22    | 5,12E-23   | TRUE |
| Rv2549c | 30   | 27   | 0,152003093  | -1,847158688 | -5,399583 | 6,68E-08  | 2,51E-07    | 5,70E-08   | TRUE |
| Rv2551c | 53   | 38   | 0,479992941  | -1,519168841 | -5,576475 | 2,45E-08  | 9,72E-08    | 2,21E-08   | TRUE |
| Rv2553c | 562  | 96   | 2,549463819  | 0,550302038  | 4,5960922 | 4,30E-06  | 1,32E-05    | 2,98E-06   | TRUE |
| Rv2556c | 729  | 129  | 2,498547749  | 0,499385967  | 4,7925866 | 1,65E-06  | 5,29E-06    | 1,20E-06   | TRUE |
| Rv2557  | 323  | 619  | -0,938405245 | -2,937567026 | -34,04478 | 4,85E-254 | 9,56E-252   | 2,17E-252  | TRUE |
| Rv2558  | 565  | 412  | 0,45560653   | -1,543555252 | -18,58262 | 4,44E-77  | 1,93E-75    | 4,37E-76   | TRUE |
| Rv2560  | 173  | 3    | 5,849665727  | 3,850503945  | 10,070308 | 7,47E-24  | 8,03E-23    | 1,82E-23   | TRUE |
| Rv2561  | 229  | 13   | 4,13876407   | 2,139602288  | 8,6600228 | 4,72E-18  | 3,65E-17    | 8,29E-18   | TRUE |
| Rv2564  | 223  | 86   | 1,374635145  | -0,624526637 | -4,027301 | 5,64E-05  | 0,000148053 | 3,36E-05   | TRUE |
| Rv2566  | 299  | 38   | 2,976074161  | 0,976912379  | 5,526798  | 3,26E-08  | 1,27E-07    | 2,89E-08   | TRUE |
| Rv2568c | 169  | 17   | 3,313416595  | 1,314254813  | 5,2723534 | 1,35E-07  | 4,89E-07    | 1,11E-07   | TRUE |
| Rv2574  | 242  | 27   | 3,163975735  | 1,164813953  | 5,7385106 | 9,55E-09  | 3,95E-08    | 8,95E-09   | TRUE |
| Rv2576c | 1043 | 118  | 3,143880393  | 1,144718611  | 11,750482 | 7,02E-32  | 1,03E-30    | 2,34E-31   | TRUE |
| Rv2581c | 212  | 27   | 2,973032952  | 0,973871171  | 4,6416561 | 3,46E-06  | 1,07E-05    | 2,43E-06   | TRUE |
| Rv2582  | 293  | 20   | 3,87282876   | 1,873666978  | 8,9828382 | 2,64E-19  | 2,21E-18    | 5,01E-19   | TRUE |
| Rv2584c | 736  | 543  | 0,438753568  | -1,560408214 | -21,5052  | 1,39E-102 | 8,85E-101   | 2,01E-101  | TRUE |
| Rv2585c | 880  | 151  | 2,542954974  | 0,543793192  | 5,6900683 | 1,27E-08  | 5,17E-08    | 1,17E-08   | TRUE |
| Rv2588c | 209  | 113  | 0,88718017   | -1,111981612 | -7,553876 | 4,22E-14  | 2,64E-13    | 5,98E-14   | TRUE |
| Rv2590  | 1743 | 1377 | 0,34004401   | -1,659117772 | -35,8138  | 6,73E-281 | 1,56E-278   | 3,55E-279  | TRUE |

|         |      |     |              |              |           |           |             |            |      |
|---------|------|-----|--------------|--------------|-----------|-----------|-------------|------------|------|
| Rv2591  | 261  | 129 | 1,016678741  | -0,982483041 | -7,292999 | 3,03E-13  | 1,80E-12    | 4,09E-13   | TRUE |
| Rv2592c | 244  | 40  | 2,608809243  | 0,609647461  | 3,3204241 | 0,0008988 | 0,001975975 | 0,00044839 | TRUE |
| Rv2593c | 101  | 10  | 3,336283388  | 1,337121606  | 4,1303497 | 3,62E-05  | 9,83E-05    | 2,23E-05   | TRUE |
| Rv2595  | 70   | 34  | 1,041820176  | -0,957341606 | -3,663962 | 0,0002483 | 0,000602192 | 0,00013661 | TRUE |
| Rv2599  | 76   | 6   | 3,662965013  | 1,663803231  | 4,2128514 | 2,52E-05  | 6,96E-05    | 1,58E-05   | TRUE |
| Rv2600  | 25   | 23  | 0,120294234  | -1,878867548 | -5,041349 | 4,62E-07  | 1,57E-06    | 3,57E-07   | TRUE |
| Rv2602  | 107  | 9   | 3,571541985  | 1,572380203  | 4,799539  | 1,59E-06  | 5,15E-06    | 1,17E-06   | TRUE |
| Rv2603c | 705  | 79  | 3,157698699  | 1,158536917  | 9,7532775 | 1,79E-22  | 1,76E-21    | 3,99E-22   | TRUE |
| Rv2604c | 221  | 120 | 0,881011964  | -1,118149818 | -7,819189 | 5,32E-15  | 3,49E-14    | 7,93E-15   | TRUE |
| Rv2606c | 895  | 86  | 3,379479117  | 1,380317336  | 12,599588 | 2,12E-36  | 3,69E-35    | 8,37E-36   | TRUE |
| Rv2608  | 133  | 18  | 2,885357434  | 0,886195652  | 3,3966478 | 0,0006822 | 0,00153303  | 0,00034782 | TRUE |
| Rv2613c | 306  | 45  | 2,765534746  | 0,766372964  | 4,549154  | 5,39E-06  | 1,62E-05    | 3,67E-06   | TRUE |
| Rv2614c | 891  | 169 | 2,398402185  | 0,399240403  | 4,3102283 | 1,63E-05  | 4,62E-05    | 1,05E-05   | TRUE |
| Rv2616  | 16   | 13  | 0,299560282  | -1,6996015   | -3,536667 | 0,0004052 | 0,000950713 | 0,00021574 | TRUE |
| Rv2619c | 65   | 5   | 3,700439718  | 1,701277936  | 3,9580224 | 7,56E-05  | 0,000195577 | 4,44E-05   | TRUE |
| Rv2623  | 890  | 708 | 0,330055976  | -1,669105806 | -25,77899 | 1,53E-146 | 1,47E-144   | 3,33E-145  | TRUE |
| Rv2624c | 180  | 2   | 6,491853096  | 4,492691314  | 10,722957 | 7,94E-27  | 9,55E-26    | 2,17E-26   | TRUE |
| Rv2625c | 555  | 37  | 3,906890596  | 1,907728814  | 12,51422  | 6,24E-36  | 1,06E-34    | 2,40E-35   | TRUE |
| Rv2627c | 417  | 213 | 0,969193953  | -1,029967829 | -9,744392 | 1,95E-22  | 1,91E-21    | 4,34E-22   | TRUE |
| Rv2628  | 118  | 81  | 0,542793046  | -1,456368735 | -7,890694 | 3,01E-15  | 2,03E-14    | 4,60E-15   | TRUE |
| Rv2631  | 233  | 31  | 2,909989834  | 0,910828052  | 4,6011319 | 4,20E-06  | 1,29E-05    | 2,92E-06   | TRUE |
| Rv2632c | 500  | 73  | 2,775959726  | 0,776797944  | 5,8837836 | 4,01E-09  | 1,72E-08    | 3,89E-09   | TRUE |
| Rv2633c | 1082 | 68  | 3,992021943  | 1,992860161  | 17,986901 | 2,47E-72  | 9,83E-71    | 2,23E-71   | TRUE |
| Rv2634c | 299  | 31  | 3,269805364  | 1,270643582  | 6,8317768 | 8,39E-12  | 4,49E-11    | 1,02E-11   | TRUE |
| Rv2639c | 172  | 65  | 1,403896942  | -0,59526484  | -3,35409  | 0,0007963 | 0,001767284 | 0,00040103 | TRUE |
| Rv2641  | 259  | 19  | 3,768880774  | 1,769718992  | 8,121997  | 4,59E-16  | 3,22E-15    | 7,32E-16   | TRUE |
| Rv2666  | 31   | 0   | 5,95419631   | 3,955034529  | 4,2999342 | 1,71E-05  | 4,82E-05    | 1,09E-05   | TRUE |
| Rv2668  | 44   | 52  | -0,2410081   | -2,240169881 | -8,489548 | 2,07E-17  | 1,55E-16    | 3,52E-17   | TRUE |
| Rv2669  | 19   | 25  | -0,395928676 | -2,395090458 | -6,126725 | 8,97E-10  | 4,10E-09    | 9,30E-10   | TRUE |
| Rv2670c | 57   | 2   | 4,832890014  | 2,833728232  | 5,0735823 | 3,90E-07  | 1,34E-06    | 3,05E-07   | TRUE |
| Rv2673  | 361  | 52  | 2,795415309  | 0,796253527  | 5,1072945 | 3,27E-07  | 1,14E-06    | 2,58E-07   | TRUE |
| Rv2674  | 186  | 73  | 1,349334252  | -0,64982753  | -3,843827 | 0,0001211 | 0,000303326 | 6,88E-05   | TRUE |
| Rv2678c | 245  | 97  | 1,336725097  | -0,662436685 | -4,507077 | 6,57E-06  | 1,96E-05    | 4,44E-06   | TRUE |
| Rv2681  | 265  | 33  | 3,00545443   | 1,006292648  | 5,3323085 | 9,70E-08  | 3,59E-07    | 8,14E-08   | TRUE |
| Rv2687c | 115  | 6   | 4,26052755   | 2,261365768  | 6,3506369 | 2,14E-10  | 1,03E-09    | 2,33E-10   | TRUE |
| Rv2691  | 199  | 26  | 2,936184902  | 0,937023121  | 4,3546427 | 1,33E-05  | 3,82E-05    | 8,66E-06   | TRUE |
| Rv2694c | 484  | 56  | 3,111508315  | 1,112346533  | 7,8210895 | 5,24E-15  | 3,45E-14    | 7,82E-15   | TRUE |



|         |      |     |             |              |           |           |             |            |      |
|---------|------|-----|-------------|--------------|-----------|-----------|-------------|------------|------|
| Rv2696c | 1032 | 337 | 1,614622474 | -0,384539308 | -5,118507 | 3,08E-07  | 1,07E-06    | 2,44E-07   | TRUE |
| Rv2698  | 88   | 3   | 4,874469118 | 2,875307336  | 6,3506319 | 2,14E-10  | 1,03E-09    | 2,33E-10   | TRUE |
| Rv2699c | 219  | 83  | 1,399747628 | -0,599414154 | -3,813896 | 0,0001368 | 0,000340171 | 7,72E-05   | TRUE |
| Rv2703  | 2798 | 472 | 2,567537198 | 0,568375416  | 10,564475 | 4,35E-26  | 5,13E-25    | 1,16E-25   | TRUE |
| Rv2704  | 499  | 78  | 2,677493786 | 0,678332005  | 5,2211728 | 1,78E-07  | 6,36E-07    | 1,44E-07   | TRUE |
| Rv2707  | 499  | 57  | 3,130005991 | 1,130844209  | 8,047601  | 8,44E-16  | 5,84E-15    | 1,33E-15   | TRUE |
| Rv2709  | 240  | 86  | 1,480625841 | -0,518535941 | -3,405806 | 0,0006597 | 0,001488457 | 0,00033776 | TRUE |
| Rv2710  | 1685 | 552 | 1,610008419 | -0,389153363 | -6,625589 | 3,46E-11  | 1,77E-10    | 4,01E-11   | TRUE |
| Rv2711  | 1754 | 634 | 1,468094002 | -0,53106778  | -9,45521  | 3,22E-21  | 2,95E-20    | 6,69E-21   | TRUE |
| Rv2712c | 30   | 23  | 0,38332864  | -1,615833142 | -4,537775 | 5,69E-06  | 1,70E-05    | 3,87E-06   | TRUE |
| Rv2713  | 769  | 419 | 0,876033354 | -1,123128428 | -14,66676 | 1,05E-48  | 2,58E-47    | 5,85E-48   | TRUE |
| Rv2714  | 369  | 48  | 2,942514505 | 0,943352723  | 5,9635096 | 2,47E-09  | 1,09E-08    | 2,46E-09   | TRUE |
| Rv2720  | 327  | 175 | 0,901935714 | -1,097226068 | -9,299937 | 1,41E-20  | 1,25E-19    | 2,83E-20   | TRUE |
| Rv2721c | 1372 | 195 | 2,814734452 | 0,815572671  | 10,166392 | 2,80E-24  | 3,11E-23    | 7,06E-24   | TRUE |
| Rv2722  | 71   | 2   | 5,14974712  | 3,150585338  | 5,959282  | 2,53E-09  | 1,11E-08    | 2,52E-09   | TRUE |
| Rv2725c | 602  | 205 | 1,554139577 | -0,445022205 | -4,571248 | 4,85E-06  | 1,47E-05    | 3,32E-06   | TRUE |
| Rv2726c | 460  | 155 | 1,569365646 | -0,429796136 | -3,848835 | 0,0001187 | 0,000297381 | 6,75E-05   | TRUE |
| Rv2728c | 127  | 17  | 2,901221846 | 0,902060064  | 3,3692859 | 0,0007536 | 0,001678332 | 0,00038085 | TRUE |
| Rv2730  | 34   | 1   | 5,087462841 | 3,088301059  | 4,0861889 | 4,39E-05  | 0,000116898 | 2,65E-05   | TRUE |
| Rv2731  | 226  | 83  | 1,445139531 | -0,554022251 | -3,552922 | 0,000381  | 0,000901904 | 0,00020466 | TRUE |
| Rv2733c | 274  | 46  | 2,574470127 | 0,575308345  | 3,3402846 | 0,0008369 | 0,001847138 | 0,00041915 | TRUE |
| Rv2735c | 158  | 11  | 3,84434913  | 1,845187348  | 6,5281626 | 6,66E-11  | 3,34E-10    | 7,58E-11   | TRUE |
| Rv2741  | 245  | 104 | 1,236198221 | -0,762963561 | -5,282277 | 1,28E-07  | 4,64E-07    | 1,05E-07   | TRUE |
| Rv2743c | 270  | 124 | 1,122619287 | -0,876542495 | -6,497447 | 8,17E-11  | 4,06E-10    | 9,22E-11   | TRUE |
| Rv2745c | 1058 | 495 | 1,095839197 | -0,903322585 | -13,32061 | 1,76E-40  | 3,38E-39    | 7,67E-40   | TRUE |
| Rv2746c | 146  | 9   | 4,019899557 | 2,020737776  | 6,6664633 | 2,62E-11  | 1,35E-10    | 3,07E-11   | TRUE |
| Rv2747  | 103  | 7   | 3,879145605 | 1,879983823  | 5,3379226 | 9,40E-08  | 3,49E-07    | 7,91E-08   | TRUE |
| Rv2748c | 1955 | 312 | 2,647550673 | 0,648388891  | 9,9330799 | 2,99E-23  | 3,11E-22    | 7,06E-23   | TRUE |
| Rv2750  | 166  | 19  | 3,127111918 | 1,127950136  | 4,6317701 | 3,63E-06  | 1,12E-05    | 2,54E-06   | TRUE |
| Rv2752c | 814  | 143 | 2,509013647 | 0,509851866  | 5,1611572 | 2,45E-07  | 8,67E-07    | 1,97E-07   | TRUE |
| Rv2753c | 959  | 194 | 2,305474163 | 0,306312381  | 3,4866243 | 0,0004892 | 0,001135514 | 0,00025767 | TRUE |
| Rv2757c | 65   | 2   | 5,022367813 | 3,023206031  | 5,5935054 | 2,23E-08  | 8,85E-08    | 2,01E-08   | TRUE |
| Rv2762c | 24   | 16  | 0,584962501 | -1,414199281 | -3,430251 | 0,000603  | 0,00137158  | 0,00031124 | TRUE |
| Rv2764c | 474  | 69  | 2,780218792 | 0,78105701   | 5,7558895 | 8,62E-09  | 3,58E-08    | 8,13E-09   | TRUE |
| Rv2770c | 259  | 32  | 3,016808288 | 1,017646506  | 5,3205898 | 1,03E-07  | 3,80E-07    | 8,63E-08   | TRUE |
| Rv2778c | 607  | 88  | 2,786121088 | 0,786959306  | 6,5562506 | 5,52E-11  | 2,78E-10    | 6,31E-11   | TRUE |
| Rv2779c | 74   | 6   | 3,624490865 | 1,625329083  | 4,0880853 | 4,35E-05  | 0,000116065 | 2,63E-05   | TRUE |

|         |      |     |              |              |           |           |             |            |      |
|---------|------|-----|--------------|--------------|-----------|-----------|-------------|------------|------|
| Rv2781c | 274  | 459 | -0,74431826  | -2,743480042 | -28,3145  | 2,29E-176 | 3,12E-174   | 7,07E-175  | TRUE |
| Rv2782c | 490  | 161 | 1,605721061  | -0,393440721 | -3,613538 | 0,000302  | 0,000725059 | 0,00016453 | TRUE |
| Rv2783c | 2422 | 393 | 2,623597647  | 0,624435866  | 10,693042 | 1,10E-26  | 1,32E-25    | 2,98E-26   | TRUE |
| Rv2784c | 475  | 57  | 3,058893689  | 1,059731907  | 7,4491532 | 9,39E-14  | 5,72E-13    | 1,30E-13   | TRUE |
| Rv2785c | 1058 | 93  | 3,507965101  | 1,508803319  | 14,644713 | 1,46E-48  | 3,52E-47    | 8,00E-48   | TRUE |
| Rv2788  | 294  | 39  | 2,914270126  | 0,915108344  | 5,188955  | 2,11E-07  | 7,53E-07    | 1,71E-07   | TRUE |
| Rv2789c | 768  | 119 | 2,690144737  | 0,690982956  | 6,5841182 | 4,58E-11  | 2,32E-10    | 5,26E-11   | TRUE |
| Rv2791c | 3893 | 735 | 2,40506619   | 0,405904408  | 9,1562525 | 5,37E-20  | 4,68E-19    | 1,06E-19   | TRUE |
| Rv2792c | 208  | 128 | 0,700439718  | -1,298722064 | -9,090818 | 9,83E-20  | 8,45E-19    | 1,92E-19   | TRUE |
| Rv2793c | 232  | 141 | 0,718429643  | -1,280732139 | -9,438608 | 3,78E-21  | 3,45E-20    | 7,83E-21   | TRUE |
| Rv2794c | 413  | 170 | 1,280607035  | -0,718554747 | -6,409933 | 1,46E-10  | 7,12E-10    | 1,61E-10   | TRUE |
| Rv2795c | 450  | 69  | 2,705256734  | 0,706094953  | 5,1362979 | 2,80E-07  | 9,82E-07    | 2,23E-07   | TRUE |
| Rv2799  | 183  | 83  | 1,140660407  | -0,858501375 | -5,22254  | 1,76E-07  | 6,33E-07    | 1,44E-07   | TRUE |
| Rv2801A | 70   | 34  | 1,041820176  | -0,957341606 | -3,663962 | 0,0002483 | 0,000602192 | 0,00013661 | TRUE |
| Rv2803  | 12   | 14  | -0,222392421 | -2,221554203 | -4,382431 | 1,17E-05  | 3,39E-05    | 7,70E-06   | TRUE |
| Rv2808  | 130  | 17  | 2,934904972  | 0,93574319   | 3,5155569 | 0,0004388 | 0,001024419 | 0,00023239 | TRUE |
| Rv2809  | 207  | 20  | 3,371558863  | 1,372397081  | 6,0321702 | 1,62E-09  | 7,24E-09    | 1,64E-09   | TRUE |
| Rv2816c | 121  | 15  | 3,011972642  | 1,01281086   | 3,6223114 | 0,000292  | 0,000703039 | 0,00015953 | TRUE |
| Rv2822c | 27   | 19  | 0,506959989  | -1,492201793 | -3,891259 | 9,97E-05  | 0,000253099 | 5,74E-05   | TRUE |
| Rv2823c | 112  | 57  | 0,974464908  | -1,024696874 | -5,018989 | 5,19E-07  | 1,75E-06    | 3,97E-07   | TRUE |
| Rv2825c | 409  | 283 | 0,53129879   | -1,467862992 | -14,83801 | 8,32E-50  | 2,13E-48    | 4,83E-49   | TRUE |
| Rv2826c | 60   | 32  | 0,906890596  | -1,092271186 | -3,961817 | 7,44E-05  | 0,000192874 | 4,38E-05   | TRUE |
| Rv2832c | 39   | 32  | 0,285402219  | -1,713759563 | -5,58136  | 2,39E-08  | 9,47E-08    | 2,15E-08   | TRUE |
| Rv2836c | 290  | 113 | 1,359730128  | -0,639431654 | -4,714505 | 2,42E-06  | 7,63E-06    | 1,73E-06   | TRUE |
| Rv2837c | 658  | 320 | 1,040015679  | -0,959146103 | -11,26085 | 2,05E-29  | 2,76E-28    | 6,25E-29   | TRUE |
| Rv2838c | 397  | 150 | 1,404176507  | -0,594985275 | -5,093488 | 3,52E-07  | 1,22E-06    | 2,77E-07   | TRUE |
| Rv2839c | 4017 | 538 | 2,900440383  | 0,901278602  | 18,950718 | 4,36E-80  | 2,02E-78    | 4,59E-79   | TRUE |
| Rv2840c | 592  | 219 | 1,434666306  | -0,564495476 | -5,870426 | 4,35E-09  | 1,85E-08    | 4,20E-09   | TRUE |
| Rv2845c | 438  | 59  | 2,89214401   | 0,892982228  | 6,2042913 | 5,49E-10  | 2,55E-09    | 5,79E-10   | TRUE |
| Rv2847c | 163  | 76  | 1,100800641  | -0,898361141 | -5,193459 | 2,06E-07  | 7,35E-07    | 1,67E-07   | TRUE |
| Rv2848c | 95   | 55  | 0,788495895  | -1,210665887 | -5,640162 | 1,70E-08  | 6,84E-08    | 1,55E-08   | TRUE |
| Rv2849c | 623  | 205 | 1,603608254  | -0,395553528 | -4,098102 | 4,17E-05  | 0,000111761 | 2,54E-05   | TRUE |
| Rv2850c | 525  | 199 | 1,399548992  | -0,59961279  | -5,907891 | 3,47E-09  | 1,50E-08    | 3,39E-09   | TRUE |
| Rv2852c | 519  | 54  | 3,264703226  | 1,265541444  | 8,9729686 | 2,89E-19  | 2,40E-18    | 5,45E-19   | TRUE |
| Rv2854  | 116  | 11  | 3,398549376  | 1,399387595  | 4,5828669 | 4,59E-06  | 1,39E-05    | 3,16E-06   | TRUE |
| Rv2855  | 159  | 92  | 0,789320999  | -1,209840783 | -7,29092  | 3,08E-13  | 1,83E-12    | 4,15E-13   | TRUE |
| Rv2857c | 381  | 67  | 2,507557997  | 0,508396215  | 3,5214363 | 0,0004292 | 0,001004049 | 0,00022784 | TRUE |

|         |      |     |              |              |           |           |             |            |      |
|---------|------|-----|--------------|--------------|-----------|-----------|-------------|------------|------|
| Rv2861c | 318  | 45  | 2,821029859  | 0,821868077  | 4,9257182 | 8,41E-07  | 2,77E-06    | 6,28E-07   | TRUE |
| Rv2864c | 277  | 32  | 3,113742166  | 1,114580384  | 5,926114  | 3,10E-09  | 1,35E-08    | 3,06E-09   | TRUE |
| Rv2867c | 441  | 164 | 1,427082841  | -0,572078941 | -5,141282 | 2,73E-07  | 9,59E-07    | 2,18E-07   | TRUE |
| Rv2868c | 2320 | 890 | 1,382247564  | -0,616914218 | -12,82424 | 1,20E-37  | 2,11E-36    | 4,79E-37   | TRUE |
| Rv2871  | 32   | 0   | 6            | 4,000838218  | 4,3843944 | 1,16E-05  | 3,37E-05    | 7,64E-06   | TRUE |
| Rv2872  | 57   | 5   | 3,510961919  | 1,511800137  | 3,4035916 | 0,0006651 | 0,001498858 | 0,00034012 | TRUE |
| Rv2876  | 154  | 18  | 3,096861539  | 1,097699757  | 4,3643811 | 1,27E-05  | 3,66E-05    | 8,30E-06   | TRUE |
| Rv2879c | 951  | 143 | 2,733430194  | 0,734268412  | 7,727764  | 1,09E-14  | 7,09E-14    | 1,61E-14   | TRUE |
| Rv2881c | 677  | 119 | 2,50819426   | 0,509032478  | 4,6997853 | 2,60E-06  | 8,17E-06    | 1,85E-06   | TRUE |
| Rv2882c | 744  | 139 | 2,420217738  | 0,421055957  | 4,1380412 | 3,50E-05  | 9,52E-05    | 2,16E-05   | TRUE |
| Rv2885c | 197  | 162 | 0,282201817  | -1,716959965 | -12,57557 | 2,88E-36  | 4,98E-35    | 1,13E-35   | TRUE |
| Rv2886c | 357  | 62  | 2,525583954  | 0,526422172  | 3,5185521 | 0,0004339 | 0,001013824 | 0,00023006 | TRUE |
| Rv2888c | 1156 | 211 | 2,453826494  | 0,454664712  | 5,5379941 | 3,06E-08  | 1,20E-07    | 2,72E-08   | TRUE |
| Rv2889c | 635  | 121 | 2,391749544  | 0,392587763  | 3,5819827 | 0,000341  | 0,000813605 | 0,00018462 | TRUE |
| Rv2890c | 487  | 77  | 2,660991421  | 0,66182964   | 5,046929  | 4,49E-07  | 1,53E-06    | 3,47E-07   | TRUE |
| Rv2895c | 529  | 68  | 2,959661071  | 0,960499289  | 7,2487522 | 4,21E-13  | 2,48E-12    | 5,62E-13   | TRUE |
| Rv2902c | 1086 | 616 | 0,818021847  | -1,181139935 | -18,51767 | 1,49E-76  | 6,38E-75    | 1,45E-75   | TRUE |
| Rv2903c | 953  | 165 | 2,53001019   | 0,530848408  | 5,7935071 | 6,89E-09  | 2,90E-08    | 6,58E-09   | TRUE |
| Rv2904c | 1492 | 268 | 2,47694263   | 0,477780848  | 6,5855259 | 4,53E-11  | 2,30E-10    | 5,22E-11   | TRUE |
| Rv2906c | 73   | 2   | 5,189824559  | 3,190662777  | 6,0771474 | 1,22E-09  | 5,53E-09    | 1,26E-09   | TRUE |
| Rv2907c | 228  | 25  | 3,189033824  | 1,189872043  | 5,6652031 | 1,47E-08  | 5,93E-08    | 1,35E-08   | TRUE |
| Rv2908c | 366  | 56  | 2,708344916  | 0,709183134  | 4,6498518 | 3,32E-06  | 1,03E-05    | 2,34E-06   | TRUE |
| Rv2909c | 267  | 23  | 3,537133976  | 1,537972194  | 7,4602861 | 8,63E-14  | 5,27E-13    | 1,20E-13   | TRUE |
| Rv2910c | 56   | 28  | 1            | -0,999161782 | -3,445164 | 0,0005707 | 0,001303356 | 0,00029576 | TRUE |
| Rv2916c | 1205 | 177 | 2,767211881  | 0,768050099  | 9,0463373 | 1,48E-19  | 1,26E-18    | 2,85E-19   | TRUE |
| Rv2918c | 308  | 122 | 1,336049203  | -0,663112579 | -5,059307 | 4,21E-07  | 1,44E-06    | 3,27E-07   | TRUE |
| Rv2919c | 468  | 166 | 1,495325288  | -0,503836494 | -4,60973  | 4,03E-06  | 1,24E-05    | 2,81E-06   | TRUE |
| Rv2922A | 23   | 78  | -1,761840263 | -3,761002045 | -13,41212 | 5,14E-41  | 1,00E-39    | 2,28E-40   | TRUE |
| Rv2922c | 739  | 234 | 1,659065835  | -0,340095947 | -3,801003 | 0,0001441 | 0,00035792  | 8,12E-05   | TRUE |
| Rv2923c | 190  | 101 | 0,911644126  | -1,087517656 | -7,014025 | 2,32E-12  | 1,30E-11    | 2,96E-12   | TRUE |
| Rv2926c | 1181 | 483 | 1,289913871  | -0,709247911 | -10,68474 | 1,20E-26  | 1,43E-25    | 3,25E-26   | TRUE |
| Rv2927c | 2040 | 401 | 2,34689501   | 0,347733229  | 5,733156  | 9,86E-09  | 4,06E-08    | 9,22E-09   | TRUE |
| Rv2928  | 765  | 61  | 3,6485786    | 1,649416818  | 13,284949 | 2,83E-40  | 5,37E-39    | 1,22E-39   | TRUE |
| Rv2929  | 425  | 22  | 4,271887412  | 2,272725631  | 12,246211 | 1,76E-34  | 2,87E-33    | 6,51E-34   | TRUE |
| Rv2931  | 2131 | 298 | 2,838146357  | 0,838984575  | 12,983175 | 1,52E-38  | 2,81E-37    | 6,37E-38   | TRUE |
| Rv2932  | 1264 | 124 | 3,349584438  | 1,350422656  | 14,726128 | 4,38E-49  | 1,09E-47    | 2,47E-48   | TRUE |
| Rv2933  | 1673 | 156 | 3,422819511  | 1,423657729  | 17,636652 | 1,29E-69  | 4,80E-68    | 1,09E-68   | TRUE |

|         |      |      |             |              |           |           |             |            |      |
|---------|------|------|-------------|--------------|-----------|-----------|-------------|------------|------|
| Rv2934  | 1243 | 105  | 3,565365063 | 1,566203282  | 16,31478  | 7,75E-60  | 2,44E-58    | 5,55E-59   | TRUE |
| Rv2935  | 2396 | 258  | 3,215184937 | 1,216023155  | 18,691442 | 5,81E-78  | 2,58E-76    | 5,84E-77   | TRUE |
| Rv2936  | 727  | 49   | 3,89110171  | 1,891939928  | 14,243437 | 4,92E-46  | 1,10E-44    | 2,49E-45   | TRUE |
| Rv2937  | 229  | 16   | 3,839203788 | 1,840042006  | 7,8443934 | 4,35E-15  | 2,89E-14    | 6,57E-15   | TRUE |
| Rv2938  | 343  | 51   | 2,749639424 | 0,750477642  | 4,7294925 | 2,25E-06  | 7,12E-06    | 1,62E-06   | TRUE |
| Rv2939  | 501  | 74   | 2,759213428 | 0,760051646  | 5,7794465 | 7,49E-09  | 3,13E-08    | 7,11E-09   | TRUE |
| Rv2940c | 8610 | 1666 | 2,369624837 | 0,370463055  | 12,519624 | 5,83E-36  | 9,96E-35    | 2,26E-35   | TRUE |
| Rv2941  | 3254 | 1049 | 1,633199573 | -0,365962209 | -8,628288 | 6,23E-18  | 4,81E-17    | 1,09E-17   | TRUE |
| Rv2942  | 1678 | 328  | 2,354974996 | 0,355813214  | 5,3125344 | 1,08E-07  | 3,96E-07    | 8,99E-08   | TRUE |
| Rv2945c | 544  | 95   | 2,517607233 | 0,518445451  | 4,2836914 | 1,84E-05  | 5,16E-05    | 1,17E-05   | TRUE |
| Rv2950c | 3851 | 826  | 2,221019436 | 0,221857654  | 5,1390981 | 2,76E-07  | 9,69E-07    | 2,20E-07   | TRUE |
| Rv2951c | 621  | 220  | 1,497089745 | -0,502072037 | -5,29011  | 1,22E-07  | 4,45E-07    | 1,01E-07   | TRUE |
| Rv2954c | 491  | 91   | 2,431784574 | 0,432622792  | 3,4468359 | 0,0005672 | 0,001296817 | 0,00029427 | TRUE |
| Rv2957  | 124  | 11   | 3,494764692 | 1,49560291   | 4,9803144 | 6,35E-07  | 2,11E-06    | 4,79E-07   | TRUE |
| Rv2959c | 740  | 64   | 3,531381461 | 1,532219679  | 12,386711 | 3,08E-35  | 5,11E-34    | 1,16E-34   | TRUE |
| Rv2960c | 83   | 2    | 5,375039431 | 3,375877649  | 6,6396405 | 3,14E-11  | 1,62E-10    | 3,67E-11   | TRUE |
| Rv2962c | 423  | 39   | 3,439111634 | 1,439949852  | 8,9424879 | 3,81E-19  | 3,13E-18    | 7,09E-19   | TRUE |
| Rv2963  | 261  | 109  | 1,259721672 | -0,73944011  | -5,262469 | 1,42E-07  | 5,16E-07    | 1,17E-07   | TRUE |
| Rv2964  | 111  | 6    | 4,209453366 | 2,210291584  | 6,1525083 | 7,63E-10  | 3,51E-09    | 7,96E-10   | TRUE |
| Rv2967c | 868  | 273  | 1,668794092 | -0,33036769  | -3,995007 | 6,47E-05  | 0,000168748 | 3,83E-05   | TRUE |
| Rv2971  | 367  | 43   | 3,093371498 | 1,094209716  | 6,7203709 | 1,81E-11  | 9,51E-11    | 2,16E-11   | TRUE |
| Rv2977c | 264  | 145  | 0,864485029 | -1,134676753 | -8,697445 | 3,39E-18  | 2,65E-17    | 6,02E-18   | TRUE |
| Rv2978c | 145  | 149  | -0,03925943 | -2,038421212 | -13,54244 | 8,78E-42  | 1,75E-40    | 3,97E-41   | TRUE |
| Rv2985  | 171  | 139  | 0,298911442 | -1,70025034  | -11,56863 | 5,94E-31  | 8,55E-30    | 1,94E-30   | TRUE |
| Rv2986c | 1262 | 148  | 3,092042829 | 1,092881047  | 12,451994 | 1,36E-35  | 2,29E-34    | 5,19E-35   | TRUE |
| Rv2993c | 156  | 13   | 3,584962501 | 1,585800719  | 5,8311537 | 5,50E-09  | 2,32E-08    | 5,27E-09   | TRUE |
| Rv2995c | 414  | 154  | 1,426700417 | -0,572461365 | -4,985024 | 6,20E-07  | 2,07E-06    | 4,69E-07   | TRUE |
| Rv3005c | 927  | 100  | 3,212569339 | 1,213407557  | 11,60327  | 3,97E-31  | 5,73E-30    | 1,30E-30   | TRUE |
| Rv3008  | 320  | 38   | 3,074000581 | 1,0748388    | 6,1848893 | 6,21E-10  | 2,87E-09    | 6,52E-10   | TRUE |
| Rv3010c | 1061 | 165  | 2,684886727 | 0,685724945  | 7,6874458 | 1,50E-14  | 9,66E-14    | 2,19E-14   | TRUE |
| Rv3013  | 41   | 32   | 0,357552005 | -1,641609777 | -5,413649 | 6,18E-08  | 2,33E-07    | 5,28E-08   | TRUE |
| Rv3018c | 100  | 4    | 4,64385619  | 2,644694408  | 6,480718  | 9,13E-11  | 4,52E-10    | 1,03E-10   | TRUE |
| Rv3024c | 313  | 140  | 1,16073583  | -0,838425952 | -6,647568 | 2,98E-11  | 1,53E-10    | 3,48E-11   | TRUE |
| Rv3027c | 155  | 15   | 3,36923381  | 1,370072028  | 5,2130132 | 1,86E-07  | 6,63E-07    | 1,50E-07   | TRUE |
| Rv3028c | 1089 | 209  | 2,381429107 | 0,382267325  | 4,5762283 | 4,73E-06  | 1,43E-05    | 3,25E-06   | TRUE |
| Rv3029c | 2413 | 345  | 2,806159649 | 0,806997867  | 13,363567 | 9,87E-41  | 1,91E-39    | 4,33E-40   | TRUE |
| Rv3039c | 61   | 33   | 0,886343218 | -1,112818564 | -4,084361 | 4,42E-05  | 0,000117703 | 2,67E-05   | TRUE |

|         |      |      |             |              |           |           |             |            |      |
|---------|------|------|-------------|--------------|-----------|-----------|-------------|------------|------|
| Rv3041c | 211  | 96   | 1,136136688 | -0,863025094 | -5,641896 | 1,68E-08  | 6,78E-08    | 1,54E-08   | TRUE |
| Rv3043c | 2194 | 660  | 1,733025596 | -0,266136186 | -5,062066 | 4,15E-07  | 1,42E-06    | 3,23E-07   | TRUE |
| Rv3045  | 953  | 473  | 1,010636031 | -0,988525751 | -14,04016 | 8,85E-45  | 1,90E-43    | 4,31E-44   | TRUE |
| Rv3047c | 139  | 10   | 3,797012978 | 1,797851196  | 6,0151214 | 1,80E-09  | 7,98E-09    | 1,81E-09   | TRUE |
| Rv3048c | 1024 | 121  | 3,081136763 | 1,081974981  | 11,125108 | 9,47E-29  | 1,24E-27    | 2,81E-28   | TRUE |
| Rv3049c | 811  | 251  | 1,69201455  | -0,307147232 | -3,575697 | 0,0003493 | 0,000832904 | 0,000189   | TRUE |
| Rv3050c | 745  | 120  | 2,63420602  | 0,635044238  | 6,0178419 | 1,77E-09  | 7,87E-09    | 1,79E-09   | TRUE |
| Rv3051c | 6688 | 1335 | 2,324735106 | 0,325573324  | 9,7683083 | 1,54E-22  | 1,52E-21    | 3,45E-22   | TRUE |
| Rv3052c | 3132 | 602  | 2,379248821 | 0,380087039  | 7,7234067 | 1,13E-14  | 7,32E-14    | 1,66E-14   | TRUE |
| Rv3053c | 838  | 141  | 2,571255081 | 0,572093299  | 5,8129455 | 6,14E-09  | 2,59E-08    | 5,87E-09   | TRUE |
| Rv3054c | 65   | 0    | 7,022367813 | 5,023206031  | 6,5717477 | 4,97E-11  | 2,51E-10    | 5,71E-11   | TRUE |
| Rv3058c | 411  | 63   | 2,70571466  | 0,706552878  | 4,911432  | 9,04E-07  | 2,97E-06    | 6,75E-07   | TRUE |
| Rv3059  | 500  | 78   | 2,680382066 | 0,681220284  | 5,2460297 | 1,55E-07  | 5,62E-07    | 1,27E-07   | TRUE |
| Rv3062  | 142  | 12   | 3,564784619 | 1,565622837  | 5,5117879 | 3,55E-08  | 1,38E-07    | 3,13E-08   | TRUE |
| Rv3069  | 23   | 20   | 0,201633861 | -1,797527921 | -4,561399 | 5,08E-06  | 1,53E-05    | 3,48E-06   | TRUE |
| Rv3072c | 133  | 54   | 1,300394933 | -0,698766849 | -3,524865 | 0,0004237 | 0,000991732 | 0,00022504 | TRUE |
| Rv3075c | 1101 | 153  | 2,847210911 | 0,848049129  | 9,4160984 | 4,68E-21  | 4,24E-20    | 9,63E-21   | TRUE |
| Rv3077  | 150  | 65   | 1,206450877 | -0,792710904 | -4,316366 | 1,59E-05  | 4,51E-05    | 1,02E-05   | TRUE |
| Rv3078  | 100  | 8    | 3,64385619  | 1,644694408  | 4,7928343 | 1,64E-06  | 5,29E-06    | 1,20E-06   | TRUE |
| Rv3083  | 221  | 12   | 4,202940059 | 2,203778277  | 8,6656627 | 4,49E-18  | 3,49E-17    | 7,91E-18   | TRUE |
| Rv3093c | 230  | 9    | 4,67556505  | 2,676403268  | 9,891978  | 4,51E-23  | 4,62E-22    | 1,05E-22   | TRUE |
| Rv3095  | 208  | 25   | 3,056583528 | 1,057421746  | 4,9203357 | 8,64E-07  | 2,84E-06    | 6,45E-07   | TRUE |
| Rv3096  | 386  | 53   | 2,864536583 | 0,865374801  | 5,6713106 | 1,42E-08  | 5,75E-08    | 1,30E-08   | TRUE |
| Rv3098A | 146  | 16   | 3,189824559 | 1,190662777  | 4,5357248 | 5,74E-06  | 1,72E-05    | 3,90E-06   | TRUE |
| Rv3099c | 440  | 55   | 3           | 1,000838218  | 6,8404434 | 7,89E-12  | 4,25E-11    | 9,64E-12   | TRUE |
| Rv3100c | 176  | 23   | 2,935869663 | 0,936707881  | 4,0940943 | 4,24E-05  | 0,00011348  | 2,58E-05   | TRUE |
| Rv3101c | 322  | 34   | 3,243454037 | 1,244292255  | 6,9744488 | 3,07E-12  | 1,71E-11    | 3,88E-12   | TRUE |
| Rv3102c | 251  | 22   | 3,512111935 | 1,512950153  | 7,1465252 | 8,90E-13  | 5,15E-12    | 1,17E-12   | TRUE |
| Rv3103c | 95   | 9    | 3,399930607 | 1,400768825  | 4,1504285 | 3,32E-05  | 9,05E-05    | 2,05E-05   | TRUE |
| Rv3105c | 359  | 49   | 2,87313019  | 0,873968408  | 5,5154273 | 3,48E-08  | 1,35E-07    | 3,07E-08   | TRUE |
| Rv3109  | 54   | 0    | 6,754887502 | 4,75572572   | 5,940003  | 2,85E-09  | 1,24E-08    | 2,82E-09   | TRUE |
| Rv3117  | 818  | 142  | 2,526209913 | 0,527048132  | 5,3324104 | 9,69E-08  | 3,59E-07    | 8,14E-08   | TRUE |
| Rv3118  | 326  | 112  | 1,541373232 | -0,45778855  | -3,467762 | 0,0005248 | 0,001212572 | 0,0002751  | TRUE |
| Rv3119  | 645  | 75   | 3,10433666  | 1,105174878  | 8,9819138 | 2,66E-19  | 2,22E-18    | 5,05E-19   | TRUE |
| Rv3120  | 172  | 24   | 2,841302254 | 0,842140472  | 3,6988196 | 0,0002166 | 0,000529955 | 0,00012026 | TRUE |
| Rv3122  | 344  | 30   | 3,519374159 | 1,520212377  | 8,3960926 | 4,62E-17  | 3,39E-16    | 7,69E-17   | TRUE |
| Rv3123  | 205  | 11   | 4,220048481 | 2,220886699  | 8,3859553 | 5,03E-17  | 3,69E-16    | 8,37E-17   | TRUE |

|         |      |      |              |              |           |           |             |            |      |
|---------|------|------|--------------|--------------|-----------|-----------|-------------|------------|------|
| Rv3125c | 80   | 4    | 4,321928095  | 2,322766313  | 5,3830091 | 7,33E-08  | 2,74E-07    | 6,23E-08   | TRUE |
| Rv3127  | 1574 | 695  | 1,179350658  | -0,819811124 | -14,53619 | 7,15E-48  | 1,70E-46    | 3,85E-47   | TRUE |
| Rv3130c | 3127 | 2905 | 0,106241056  | -1,892920726 | -57,04054 | 0         | 0           | 0          | TRUE |
| Rv3131  | 1501 | 3413 | -1,185116437 | -3,184278219 | -83,116   | 0         | 0           | 0          | TRUE |
| Rv3132c | 817  | 43   | 4,247927513  | 2,248765732  | 16,87102  | 7,35E-64  | 2,59E-62    | 5,87E-63   | TRUE |
| Rv3134c | 1301 | 773  | 0,751080643  | -1,248081139 | -21,66884 | 4,04E-104 | 2,65E-102   | 6,02E-103  | TRUE |
| Rv3135  | 60   | 0    | 6,906890596  | 4,907728814  | 6,2934657 | 3,10E-10  | 1,47E-09    | 3,34E-10   | TRUE |
| Rv3136  | 818  | 127  | 2,687272346  | 0,688110564  | 6,7702659 | 1,29E-11  | 6,81E-11    | 1,54E-11   | TRUE |
| Rv3136A | 40   | 0    | 6,321928095  | 4,322766313  | 5,0089651 | 5,47E-07  | 1,84E-06    | 4,18E-07   | TRUE |
| Rv3139  | 880  | 292  | 1,591535155  | -0,407626627 | -5,030178 | 4,90E-07  | 1,66E-06    | 3,77E-07   | TRUE |
| Rv3140  | 1293 | 141  | 3,196955207  | 1,197793426  | 13,56503  | 6,46E-42  | 1,30E-40    | 2,95E-41   | TRUE |
| Rv3144c | 477  | 88   | 2,438413837  | 0,439252055  | 3,4454261 | 0,0005702 | 0,001302845 | 0,00029564 | TRUE |
| Rv3145  | 563  | 196  | 1,522281268  | -0,476880514 | -4,763338 | 1,90E-06  | 6,08E-06    | 1,38E-06   | TRUE |
| Rv3147  | 1119 | 137  | 3,029962238  | 1,030800456  | 11,178611 | 5,19E-29  | 6,82E-28    | 1,55E-28   | TRUE |
| Rv3151  | 1444 | 535  | 1,432459946  | -0,566701836 | -9,210483 | 3,25E-20  | 2,83E-19    | 6,43E-20   | TRUE |
| Rv3152  | 782  | 127  | 2,622340111  | 0,623178329  | 6,0627744 | 1,34E-09  | 6,04E-09    | 1,37E-09   | TRUE |
| Rv3153  | 1097 | 132  | 3,054953691  | 1,055791909  | 11,287461 | 1,51E-29  | 2,05E-28    | 4,65E-29   | TRUE |
| Rv3154  | 681  | 104  | 2,71107127   | 0,711909488  | 6,364497  | 1,96E-10  | 9,45E-10    | 2,14E-10   | TRUE |
| Rv3155  | 273  | 26   | 3,392317423  | 1,393155641  | 7,0070035 | 2,43E-12  | 1,36E-11    | 3,10E-12   | TRUE |
| Rv3157  | 1175 | 149  | 2,979276521  | 0,980114739  | 10,987914 | 4,37E-28  | 5,52E-27    | 1,25E-27   | TRUE |
| Rv3158  | 1225 | 221  | 2,470663474  | 0,471501693  | 5,8948551 | 3,75E-09  | 1,61E-08    | 3,66E-09   | TRUE |
| Rv3159c | 241  | 35   | 2,783606319  | 0,784444537  | 4,1194014 | 3,80E-05  | 0,000102403 | 2,32E-05   | TRUE |
| Rv3161c | 222  | 139  | 0,675474794  | -1,323686988 | -9,613882 | 6,99E-22  | 6,64E-21    | 1,51E-21   | TRUE |
| Rv3162c | 38   | 21   | 0,855610091  | -1,143551691 | -3,33036  | 0,0008673 | 0,001909981 | 0,00043341 | TRUE |
| Rv3168  | 115  | 13   | 3,145050333  | 1,145888551  | 3,9042712 | 9,45E-05  | 0,000240715 | 5,46E-05   | TRUE |
| Rv3172c | 176  | 17   | 3,371968777  | 1,372806996  | 5,5634115 | 2,65E-08  | 1,04E-07    | 2,37E-08   | TRUE |
| Rv3176c | 36   | 29   | 0,311944006  | -1,687217776 | -5,255112 | 1,48E-07  | 5,36E-07    | 1,22E-07   | TRUE |
| Rv3190c | 306  | 33   | 3,212993723  | 1,213831941  | 6,6676096 | 2,60E-11  | 1,35E-10    | 3,05E-11   | TRUE |
| Rv3193c | 1495 | 296  | 2,336476403  | 0,337314622  | 4,7688366 | 1,85E-06  | 5,92E-06    | 1,34E-06   | TRUE |
| Rv3197  | 1278 | 806  | 0,665036092  | -1,334125689 | -23,30209 | 4,22E-120 | 3,14E-118   | 7,04E-119  | TRUE |
| Rv3197A | 37   | 2    | 4,209453366  | 2,210291584  | 3,5521171 | 0,0003821 | 0,000903584 | 0,00020492 | TRUE |
| Rv3198c | 327  | 137  | 1,255114743  | -0,744047039 | -5,931958 | 2,99E-09  | 1,30E-08    | 2,96E-09   | TRUE |
| Rv3200c | 753  | 66   | 3,512111935  | 1,512950153  | 12,379204 | 3,39E-35  | 5,59E-34    | 1,27E-34   | TRUE |
| Rv3201c | 155  | 20   | 2,95419631   | 0,955034529  | 3,9048203 | 9,43E-05  | 0,000240402 | 5,46E-05   | TRUE |
| Rv3205c | 1570 | 216  | 2,861661342  | 0,86249956   | 11,40829  | 3,80E-30  | 5,30E-29    | 1,20E-29   | TRUE |
| Rv3207c | 552  | 234  | 1,238159737  | -0,761002045 | -7,906642 | 2,64E-15  | 1,79E-14    | 4,06E-15   | TRUE |
| Rv3208A | 617  | 111  | 2,474710813  | 0,475549031  | 4,2159011 | 2,49E-05  | 6,89E-05    | 1,56E-05   | TRUE |

|         |      |      |             |              |           |           |             |            |      |
|---------|------|------|-------------|--------------|-----------|-----------|-------------|------------|------|
| Rv3209  | 384  | 41   | 3,227410496 | 1,228248714  | 7,5391797 | 4,73E-14  | 2,93E-13    | 6,64E-14   | TRUE |
| Rv3210c | 217  | 11   | 4,302119614 | 2,302957832  | 8,8204133 | 1,14E-18  | 9,10E-18    | 2,07E-18   | TRUE |
| Rv3211  | 859  | 154  | 2,47972778  | 0,480565999  | 5,0228489 | 5,09E-07  | 1,72E-06    | 3,90E-07   | TRUE |
| Rv3213c | 693  | 239  | 1,535844734 | -0,463317048 | -5,122601 | 3,01E-07  | 1,05E-06    | 2,39E-07   | TRUE |
| Rv3214  | 248  | 28   | 3,146841388 | 1,147679606  | 5,7407887 | 9,42E-09  | 3,91E-08    | 8,87E-09   | TRUE |
| Rv3217c | 263  | 107  | 1,297452003 | -0,701709779 | -4,980374 | 6,35E-07  | 2,11E-06    | 4,79E-07   | TRUE |
| Rv3219  | 4013 | 884  | 2,182562881 | 0,1834011    | 4,365977  | 1,27E-05  | 3,64E-05    | 8,27E-06   | TRUE |
| Rv3220c | 807  | 339  | 1,2512834   | -0,747878382 | -9,374708 | 6,94E-21  | 6,23E-20    | 1,41E-20   | TRUE |
| Rv3223c | 600  | 60   | 3,321928095 | 1,322766313  | 9,9846727 | 1,78E-23  | 1,88E-22    | 4,26E-23   | TRUE |
| Rv3227  | 123  | 54   | 1,187627003 | -0,811534779 | -4,014485 | 5,96E-05  | 0,000156124 | 3,54E-05   | TRUE |
| Rv3229c | 5095 | 1563 | 1,704764368 | -0,294397414 | -8,583102 | 9,23E-18  | 7,07E-17    | 1,60E-17   | TRUE |
| Rv3230c | 769  | 555  | 0,470495827 | -1,528665955 | -21,41699 | 9,28E-102 | 5,81E-100   | 1,32E-100  | TRUE |
| Rv3237c | 150  | 67   | 1,1627295   | -0,836432282 | -4,589073 | 4,45E-06  | 1,36E-05    | 3,08E-06   | TRUE |
| Rv3240c | 1853 | 344  | 2,429382411 | 0,430220629  | 6,6638786 | 2,67E-11  | 1,38E-10    | 3,12E-11   | TRUE |
| Rv3241c | 296  | 168  | 0,817135943 | -1,182025839 | -9,672987 | 3,93E-22  | 3,81E-21    | 8,64E-22   | TRUE |
| Rv3243c | 326  | 35   | 3,219445137 | 1,220283355  | 6,9109291 | 4,81E-12  | 2,63E-11    | 5,97E-12   | TRUE |
| Rv3245c | 1451 | 228  | 2,66994179  | 0,670780008  | 8,8176364 | 1,17E-18  | 9,31E-18    | 2,11E-18   | TRUE |
| Rv3246c | 1773 | 240  | 2,885086225 | 0,885924443  | 12,402736 | 2,53E-35  | 4,20E-34    | 9,54E-35   | TRUE |
| Rv3250c | 266  | 126  | 1,078002512 | -0,92115927  | -6,830008 | 8,49E-12  | 4,54E-11    | 1,03E-11   | TRUE |
| Rv3251c | 64   | 41   | 0,642447995 | -1,356713787 | -5,320711 | 1,03E-07  | 3,80E-07    | 8,63E-08   | TRUE |
| Rv3252c | 216  | 189  | 0,192645078 | -1,806516704 | -14,07178 | 5,66E-45  | 1,23E-43    | 2,80E-44   | TRUE |
| Rv3260c | 406  | 71   | 2,515588798 | 0,516427016  | 3,6874415 | 0,0002265 | 0,000552502 | 0,00012537 | TRUE |
| Rv3261  | 194  | 149  | 0,380744322 | -1,61841746  | -11,56399 | 6,27E-31  | 9,00E-30    | 2,04E-30   | TRUE |
| Rv3262  | 205  | 199  | 0,042855479 | -1,956306303 | -15,23585 | 2,04E-52  | 5,64E-51    | 1,28E-51   | TRUE |
| Rv3263  | 126  | 9    | 3,807354922 | 1,80819314   | 5,7495536 | 8,95E-09  | 3,71E-08    | 8,43E-09   | TRUE |
| Rv3265c | 465  | 79   | 2,557306158 | 0,558144376  | 4,2344024 | 2,29E-05  | 6,38E-05    | 1,45E-05   | TRUE |
| Rv3267  | 597  | 92   | 2,698025165 | 0,698863383  | 5,8629888 | 4,55E-09  | 1,93E-08    | 4,37E-09   | TRUE |
| Rv3269  | 878  | 161  | 2,447160251 | 0,44799847   | 4,760782  | 1,93E-06  | 6,14E-06    | 1,39E-06   | TRUE |
| Rv3270  | 983  | 454  | 1,114499119 | -0,884662663 | -12,53357 | 4,89E-36  | 8,39E-35    | 1,90E-35   | TRUE |
| Rv3271c | 355  | 155  | 1,195550809 | -0,803610973 | -6,744848 | 1,53E-11  | 8,08E-11    | 1,83E-11   | TRUE |
| Rv3273  | 1021 | 554  | 0,882024985 | -1,117136797 | -16,79407 | 2,70E-63  | 9,33E-62    | 2,12E-62   | TRUE |
| Rv3274c | 1643 | 229  | 2,842912977 | 0,843751195  | 11,454173 | 2,24E-30  | 3,16E-29    | 7,16E-30   | TRUE |
| Rv3276c | 353  | 62   | 2,509328063 | 0,510166281  | 3,4003058 | 0,0006731 | 0,001515255 | 0,00034384 | TRUE |
| Rv3277  | 399  | 26   | 3,939805218 | 1,940643436  | 10,732117 | 7,19E-27  | 8,68E-26    | 1,97E-26   | TRUE |
| Rv3278c | 47   | 3    | 3,969626351 | 1,970464569  | 3,7205231 | 0,0001988 | 0,000487327 | 0,00011058 | TRUE |
| Rv3280  | 930  | 155  | 2,584962501 | 0,585800719  | 6,2557035 | 3,96E-10  | 1,86E-09    | 4,23E-10   | TRUE |
| Rv3283  | 1110 | 187  | 2,569449501 | 0,570287719  | 6,6715502 | 2,53E-11  | 1,31E-10    | 2,98E-11   | TRUE |

|         |      |      |              |              |           |           |             |            |      |
|---------|------|------|--------------|--------------|-----------|-----------|-------------|------------|------|
| Rv3284  | 287  | 41   | 2,807354922  | 0,80819314   | 4,6124997 | 3,98E-06  | 1,22E-05    | 2,77E-06   | TRUE |
| Rv3285  | 1715 | 647  | 1,406370959  | -0,592790823 | -10,54836 | 5,17E-26  | 6,07E-25    | 1,38E-25   | TRUE |
| Rv3287c | 201  | 84   | 1,258734268  | -0,740427513 | -4,624998 | 3,75E-06  | 1,15E-05    | 2,62E-06   | TRUE |
| Rv3288c | 320  | 476  | -0,572889668 | -2,57205145  | -27,84801 | 1,14E-170 | 1,50E-168   | 3,40E-169  | TRUE |
| Rv3289c | 188  | 855  | -2,185191758 | -4,18435354  | -45,91846 | 0         | 0           | 0          | TRUE |
| Rv3290c | 763  | 1588 | -1,05745595  | -3,056617732 | -55,60169 | 0         | 0           | 0          | TRUE |
| Rv3292  | 119  | 54   | 1,139930261  | -0,859231521 | -4,215441 | 2,49E-05  | 6,90E-05    | 1,56E-05   | TRUE |
| Rv3293  | 245  | 123  | 0,994123434  | -1,005038348 | -7,256404 | 3,98E-13  | 2,34E-12    | 5,32E-13   | TRUE |
| Rv3296  | 229  | 85   | 1,429812852  | -0,56934893  | -3,685145 | 0,0002286 | 0,000557162 | 0,00012643 | TRUE |
| Rv3304  | 114  | 11   | 3,373458396  | 1,374296614  | 4,4811692 | 7,42E-06  | 2,19E-05    | 4,98E-06   | TRUE |
| Rv3307  | 114  | 205  | -0,846590085 | -2,845751867 | -19,28091 | 7,77E-83  | 3,74E-81    | 8,48E-82   | TRUE |
| Rv3308  | 177  | 79   | 1,163824802  | -0,83533698  | -4,977589 | 6,44E-07  | 2,13E-06    | 4,84E-07   | TRUE |
| Rv3309c | 45   | 3    | 3,906890596  | 1,907728814  | 3,5631213 | 0,0003665 | 0,000870176 | 0,00019746 | TRUE |
| Rv3310  | 131  | 8    | 4,033423002  | 2,03426122   | 6,3420953 | 2,27E-10  | 1,08E-09    | 2,45E-10   | TRUE |
| Rv3311  | 527  | 63   | 3,064379228  | 1,065217446  | 7,8795109 | 3,29E-15  | 2,20E-14    | 5,00E-15   | TRUE |
| Rv3312A | 256  | 242  | 0,081136763  | -1,918025019 | -16,5828  | 9,28E-62  | 3,05E-60    | 6,92E-61   | TRUE |
| Rv3313c | 198  | 28   | 2,822001698  | 0,822839916  | 3,8906074 | 1,00E-04  | 0,000253617 | 5,76E-05   | TRUE |
| Rv3317  | 70   | 5    | 3,807354922  | 1,80819314   | 4,2854273 | 1,82E-05  | 5,13E-05    | 1,16E-05   | TRUE |
| Rv3318  | 208  | 28   | 2,893084796  | 0,893923014  | 4,2790974 | 1,88E-05  | 5,26E-05    | 1,19E-05   | TRUE |
| Rv3319  | 396  | 62   | 2,67516031   | 0,675998528  | 4,63697   | 3,54E-06  | 1,10E-05    | 2,49E-06   | TRUE |
| Rv3320c | 129  | 11   | 3,551795637  | 1,552633855  | 5,2215771 | 1,77E-07  | 6,36E-07    | 1,44E-07   | TRUE |
| Rv3321c | 134  | 11   | 3,606657572  | 1,60749579   | 5,4577224 | 4,82E-08  | 1,84E-07    | 4,17E-08   | TRUE |
| Rv3328c | 87   | 47   | 0,888354644  | -1,110807138 | -4,867283 | 1,13E-06  | 3,70E-06    | 8,40E-07   | TRUE |
| Rv3332  | 89   | 50   | 0,831877241  | -1,167284541 | -5,224095 | 1,75E-07  | 6,29E-07    | 1,43E-07   | TRUE |
| Rv3334  | 145  | 13   | 3,479469372  | 1,48030759   | 5,3446379 | 9,06E-08  | 3,37E-07    | 7,64E-08   | TRUE |
| Rv3336c | 373  | 59   | 2,660388771  | 0,661226989  | 4,4132193 | 1,02E-05  | 2,97E-05    | 6,73E-06   | TRUE |
| Rv3338  | 169  | 24   | 2,815916936  | 0,816755154  | 3,5715762 | 0,0003548 | 0,00084459  | 0,00019165 | TRUE |
| Rv3339c | 331  | 46   | 2,847125451  | 0,847963669  | 5,1615744 | 2,45E-07  | 8,65E-07    | 1,96E-07   | TRUE |
| Rv3340  | 152  | 9    | 4,078002512  | 2,07884073   | 6,9275492 | 4,28E-12  | 2,36E-11    | 5,34E-12   | TRUE |
| Rv3343c | 890  | 97   | 3,197748684  | 1,198586902  | 11,259292 | 2,08E-29  | 2,80E-28    | 6,34E-29   | TRUE |
| Rv3347c | 1068 | 149  | 2,841527411  | 0,842365629  | 9,2207751 | 2,95E-20  | 2,59E-19    | 5,88E-20   | TRUE |
| Rv3350c | 605  | 88   | 2,781359714  | 0,782197932  | 6,5112071 | 7,45E-11  | 3,72E-10    | 8,43E-11   | TRUE |
| Rv3353c | 21   | 0    | 5,392317423  | 3,393155641  | 3,3467983 | 0,0008175 | 0,001810866 | 0,0004108  | TRUE |
| Rv3360  | 90   | 41   | 1,134301092  | -0,86486069  | -3,693563 | 0,0002211 | 0,000540365 | 0,00012256 | TRUE |
| Rv3365c | 450  | 167  | 1,430076899  | -0,569084883 | -5,163634 | 2,42E-07  | 8,57E-07    | 1,94E-07   | TRUE |
| Rv3371  | 55   | 52   | 0,080919995  | -1,918241787 | -7,686628 | 1,51E-14  | 9,70E-14    | 2,20E-14   | TRUE |
| Rv3376  | 1244 | 151  | 3,042366031  | 1,043204249  | 11,902953 | 1,14E-32  | 1,73E-31    | 3,93E-32   | TRUE |



|         |      |      |              |              |           |           |             |            |      |
|---------|------|------|--------------|--------------|-----------|-----------|-------------|------------|------|
| Rv3382c | 148  | 103  | 0,522952838  | -1,476208943 | -8,988373 | 2,51E-19  | 2,11E-18    | 4,78E-19   | TRUE |
| Rv3383c | 494  | 228  | 1,115477217  | -0,883684564 | -8,872056 | 7,18E-19  | 5,80E-18    | 1,32E-18   | TRUE |
| Rv3386  | 160  | 18   | 3,152003093  | 1,152841312  | 4,6276308 | 3,70E-06  | 1,14E-05    | 2,59E-06   | TRUE |
| Rv3389c | 1088 | 129  | 3,076235586  | 1,077073804  | 11,425401 | 3,12E-30  | 4,37E-29    | 9,91E-30   | TRUE |
| Rv3392c | 102  | 7    | 3,86507042   | 1,865908638  | 5,2850517 | 1,26E-07  | 4,57E-07    | 1,04E-07   | TRUE |
| Rv3394c | 41   | 33   | 0,313157885  | -1,686003897 | -5,60299  | 2,11E-08  | 8,41E-08    | 1,91E-08   | TRUE |
| Rv3395c | 95   | 46   | 1,046293652  | -0,95286813  | -4,245192 | 2,18E-05  | 6,09E-05    | 1,38E-05   | TRUE |
| Rv3396c | 1214 | 162  | 2,905702703  | 0,906540921  | 10,463076 | 1,28E-25  | 1,49E-24    | 3,37E-25   | TRUE |
| Rv3402c | 60   | 97   | -0,693022247 | -2,692184028 | -12,88493 | 5,47E-38  | 9,72E-37    | 2,21E-37   | TRUE |
| Rv3403c | 254  | 37   | 2,779231321  | 0,780069539  | 4,208662  | 2,57E-05  | 7,08E-05    | 1,61E-05   | TRUE |
| Rv3404c | 266  | 12   | 4,470319935  | 2,471158153  | 10,177896 | 2,49E-24  | 2,77E-23    | 6,29E-24   | TRUE |
| Rv3407  | 6439 | 1110 | 2,536276973  | 0,537115192  | 15,240528 | 1,90E-52  | 5,29E-51    | 1,20E-51   | TRUE |
| Rv3408  | 1431 | 493  | 1,53736412   | -0,461797662 | -7,336875 | 2,19E-13  | 1,31E-12    | 2,98E-13   | TRUE |
| Rv3409c | 681  | 293  | 1,216754134  | -0,782407648 | -9,063087 | 1,27E-19  | 1,08E-18    | 2,45E-19   | TRUE |
| Rv3411c | 1792 | 334  | 2,42365063   | 0,424488848  | 6,4722992 | 9,65E-11  | 4,76E-10    | 1,08E-10   | TRUE |
| Rv3412  | 931  | 172  | 2,436372603  | 0,437210821  | 4,7933391 | 1,64E-06  | 5,29E-06    | 1,20E-06   | TRUE |
| Rv3413c | 588  | 73   | 3,009847786  | 1,010686004  | 7,9720634 | 1,56E-15  | 1,07E-14    | 2,42E-15   | TRUE |
| Rv3414c | 1003 | 132  | 2,925711771  | 0,926549989  | 9,686262  | 3,45E-22  | 3,35E-21    | 7,60E-22   | TRUE |
| Rv3416  | 82   | 60   | 0,450661409  | -1,548500373 | -7,106369 | 1,19E-12  | 6,84E-12    | 1,55E-12   | TRUE |
| Rv3418c | 646  | 70   | 3,206107338  | 1,206945556  | 9,6449756 | 5,16E-22  | 4,95E-21    | 1,12E-21   | TRUE |
| Rv3420c | 410  | 68   | 2,592017258  | 0,592855476  | 4,1979901 | 2,69E-05  | 7,40E-05    | 1,68E-05   | TRUE |
| Rv3423c | 231  | 33   | 2,807354922  | 0,80819314   | 4,1380535 | 3,50E-05  | 9,53E-05    | 2,16E-05   | TRUE |
| Rv3424c | 45   | 2    | 4,491853096  | 2,492691314  | 4,2068703 | 2,59E-05  | 7,13E-05    | 1,62E-05   | TRUE |
| Rv3425  | 40   | 1    | 5,321928095  | 3,322766313  | 4,5787191 | 4,68E-06  | 1,42E-05    | 3,22E-06   | TRUE |
| Rv3429  | 604  | 30   | 4,331514144  | 2,332352362  | 14,828424 | 9,60E-50  | 2,44E-48    | 5,54E-49   | TRUE |
| Rv3430c | 89   | 50   | 0,831877241  | -1,167284541 | -5,224095 | 1,75E-07  | 6,29E-07    | 1,43E-07   | TRUE |
| Rv3432c | 88   | 39   | 1,1740294    | -0,825132382 | -3,460611 | 0,000539  | 0,001235829 | 0,00028043 | TRUE |
| Rv3434c | 97   | 11   | 3,140481224  | 1,141319442  | 3,5742433 | 0,0003512 | 0,000837039 | 0,00018994 | TRUE |
| Rv3435c | 603  | 86   | 2,809749437  | 0,810587655  | 6,7032977 | 2,04E-11  | 1,06E-10    | 2,41E-11   | TRUE |
| Rv3436c | 1195 | 163  | 2,874066749  | 0,874904967  | 10,073671 | 7,22E-24  | 7,78E-23    | 1,77E-23   | TRUE |
| Rv3437  | 42   | 26   | 0,691877705  | -1,307284077 | -4,117765 | 3,83E-05  | 0,000103063 | 2,34E-05   | TRUE |
| Rv3439c | 74   | 35   | 1,080170349  | -0,918991433 | -3,592334 | 0,0003277 | 0,000783371 | 0,00017776 | TRUE |
| Rv3441c | 373  | 168  | 1,150714397  | -0,848447384 | -7,356474 | 1,89E-13  | 1,14E-12    | 2,58E-13   | TRUE |
| Rv3442c | 495  | 79   | 2,647503967  | 0,648342185  | 4,9961957 | 5,85E-07  | 1,96E-06    | 4,44E-07   | TRUE |
| Rv3443c | 233  | 37   | 2,654732779  | 0,655570997  | 3,4614654 | 0,0005372 | 0,001232628 | 0,00027971 | TRUE |
| Rv3447c | 15   | 20   | -0,415037499 | -2,414199281 | -5,505356 | 3,68E-08  | 1,42E-07    | 3,23E-08   | TRUE |
| Rv3452  | 123  | 8    | 3,942514505  | 1,943352723  | 5,9639759 | 2,46E-09  | 1,08E-08    | 2,46E-09   | TRUE |

|         |      |      |             |              |           |           |             |            |      |
|---------|------|------|-------------|--------------|-----------|-----------|-------------|------------|------|
| Rv3454  | 38   | 1    | 5,247927513 | 3,248765732  | 4,4197068 | 9,88E-06  | 2,88E-05    | 6,54E-06   | TRUE |
| Rv3456c | 1305 | 470  | 1,473317145 | -0,525844637 | -8,066927 | 7,21E-16  | 5,01E-15    | 1,14E-15   | TRUE |
| Rv3459c | 1366 | 161  | 3,08482489  | 1,085663108  | 12,885734 | 5,42E-38  | 9,67E-37    | 2,19E-37   | TRUE |
| Rv3460c | 3438 | 268  | 3,681264639 | 1,682102857  | 28,571334 | 1,53E-179 | 2,23E-177   | 5,06E-178  | TRUE |
| Rv3461c | 511  | 58   | 3,139198486 | 1,140036704  | 8,1969397 | 2,47E-16  | 1,75E-15    | 3,98E-16   | TRUE |
| Rv3464  | 358  | 50   | 2,839959587 | 0,840797806  | 5,3292478 | 9,86E-08  | 3,64E-07    | 8,26E-08   | TRUE |
| Rv3465  | 325  | 31   | 3,390099598 | 1,390937816  | 7,6361018 | 2,24E-14  | 1,42E-13    | 3,23E-14   | TRUE |
| Rv3472  | 234  | 34   | 2,782901878 | 0,783740096  | 4,055979  | 4,99E-05  | 0,000131796 | 2,99E-05   | TRUE |
| Rv3475  | 30   | 0    | 5,906890596 | 3,907728814  | 4,2138185 | 2,51E-05  | 6,94E-05    | 1,57E-05   | TRUE |
| Rv3476c | 211  | 15   | 3,814208593 | 1,815046811  | 7,4597274 | 8,67E-14  | 5,29E-13    | 1,20E-13   | TRUE |
| Rv3477  | 5035 | 1139 | 2,144224031 | 0,145062249  | 3,8950455 | 9,82E-05  | 0,000249339 | 5,66E-05   | TRUE |
| Rv3478  | 5178 | 2878 | 0,847328373 | -1,151833409 | -39,3005  | 0         | 0           | 0          | TRUE |
| Rv3479  | 940  | 316  | 1,572736198 | -0,426425583 | -5,45646  | 4,86E-08  | 1,85E-07    | 4,20E-08   | TRUE |
| Rv3480c | 619  | 100  | 2,629939409 | 0,630777628  | 5,4524137 | 4,97E-08  | 1,89E-07    | 4,29E-08   | TRUE |
| Rv3481c | 141  | 5    | 4,817623258 | 2,818461476  | 7,9578115 | 1,75E-15  | 1,19E-14    | 2,71E-15   | TRUE |
| Rv3485c | 234  | 84   | 1,478047297 | -0,521114485 | -3,38119  | 0,0007217 | 0,001610914 | 0,00036555 | TRUE |
| Rv3487c | 1793 | 325  | 2,463863865 | 0,464702083  | 7,0381601 | 1,95E-12  | 1,10E-11    | 2,50E-12   | TRUE |
| Rv3489  | 455  | 66   | 2,785328616 | 0,786166834  | 5,6711942 | 1,42E-08  | 5,75E-08    | 1,30E-08   | TRUE |
| Rv3491  | 469  | 85   | 2,464053176 | 0,464891394  | 3,5997887 | 0,0003185 | 0,000762178 | 0,00017295 | TRUE |
| Rv3498c | 475  | 85   | 2,482392767 | 0,483230985  | 3,7537106 | 0,0001742 | 0,000428688 | 9,73E-05   | TRUE |
| Rv3500c | 306  | 15   | 4,350497247 | 2,351335465  | 10,605041 | 2,82E-26  | 3,33E-25    | 7,57E-26   | TRUE |
| Rv3501c | 160  | 13   | 3,621488377 | 1,622326595  | 6,0033429 | 1,93E-09  | 8,56E-09    | 1,94E-09   | TRUE |
| Rv3502c | 225  | 24   | 3,22881869  | 1,229656909  | 5,7760161 | 7,65E-09  | 3,19E-08    | 7,24E-09   | TRUE |
| Rv3503c | 646  | 54   | 3,580502853 | 1,581341071  | 11,842856 | 2,34E-32  | 3,53E-31    | 8,00E-32   | TRUE |
| Rv3508  | 413  | 178  | 1,21426454  | -0,784897241 | -7,082731 | 1,41E-12  | 8,07E-12    | 1,83E-12   | TRUE |
| Rv3509c | 289  | 100  | 1,531069493 | -0,468092289 | -3,344461 | 0,0008244 | 0,001822613 | 0,00041359 | TRUE |
| Rv3510c | 116  | 13   | 3,157541277 | 1,158379495  | 3,9553829 | 7,64E-05  | 0,00019749  | 4,48E-05   | TRUE |
| Rv3516  | 61   | 4    | 3,930737338 | 1,931575556  | 4,1830272 | 2,88E-05  | 7,89E-05    | 1,79E-05   | TRUE |
| Rv3518c | 255  | 113  | 1,174174474 | -0,824987307 | -5,890091 | 3,86E-09  | 1,65E-08    | 3,75E-09   | TRUE |
| Rv3519  | 235  | 106  | 1,148596492 | -0,85056529  | -5,855557 | 4,75E-09  | 2,01E-08    | 4,57E-09   | TRUE |
| Rv3520c | 360  | 141  | 1,352301744 | -0,646860038 | -5,320773 | 1,03E-07  | 3,81E-07    | 8,63E-08   | TRUE |
| Rv3521  | 80   | 5    | 4           | 2,000838218  | 4,9029741 | 9,44E-07  | 3,10E-06    | 7,03E-07   | TRUE |
| Rv3523  | 237  | 142  | 0,738996129 | -1,260165652 | -9,353202 | 8,50E-21  | 7,59E-20    | 1,72E-20   | TRUE |
| Rv3524  | 537  | 51   | 3,396352936 | 1,397191154  | 9,8494268 | 6,89E-23  | 6,97E-22    | 1,58E-22   | TRUE |
| Rv3528c | 265  | 17   | 3,962385708 | 1,963223926  | 8,8132877 | 1,22E-18  | 9,64E-18    | 2,19E-18   | TRUE |
| Rv3531c | 60   | 5    | 3,584962501 | 1,585800719  | 3,6162703 | 0,0002989 | 0,000719204 | 0,0001632  | TRUE |
| Rv3533c | 93   | 7    | 3,731803889 | 1,732642107  | 4,7955466 | 1,62E-06  | 5,24E-06    | 1,19E-06   | TRUE |

|         |       |      |              |              |           |           |             |            |      |
|---------|-------|------|--------------|--------------|-----------|-----------|-------------|------------|------|
| Rv3536c | 170   | 20   | 3,087462841  | 1,088301059  | 4,5536641 | 5,27E-06  | 1,59E-05    | 3,60E-06   | TRUE |
| Rv3539  | 48    | 26   | 0,884522783  | -1,114638999 | -3,630148 | 0,0002833 | 0,000682868 | 0,00015496 | TRUE |
| Rv3549c | 135   | 70   | 0,94753258   | -1,051629202 | -5,681624 | 1,33E-08  | 5,42E-08    | 1,23E-08   | TRUE |
| Rv3551  | 37    | 26   | 0,509013647  | -1,490148134 | -4,547352 | 5,43E-06  | 1,63E-05    | 3,70E-06   | TRUE |
| Rv3554  | 353   | 48   | 2,878561873  | 0,879400091  | 5,4979486 | 3,84E-08  | 1,48E-07    | 3,36E-08   | TRUE |
| Rv3556c | 192   | 73   | 1,395137942  | -0,60402384  | -3,601367 | 0,0003165 | 0,000758026 | 0,00017201 | TRUE |
| Rv3557c | 114   | 5    | 4,510961919  | 2,511800137  | 6,7249242 | 1,76E-11  | 9,23E-11    | 2,09E-11   | TRUE |
| Rv3558  | 78    | 7    | 3,478047297  | 1,478885515  | 3,9171138 | 8,96E-05  | 0,000229062 | 5,20E-05   | TRUE |
| Rv3566A | 33    | 42   | -0,347923303 | -2,347085085 | -7,847053 | 4,26E-15  | 2,84E-14    | 6,45E-15   | TRUE |
| Rv3566c | 133   | 79   | 0,751501687  | -1,247660095 | -6,921803 | 4,46E-12  | 2,44E-11    | 5,54E-12   | TRUE |
| Rv3569c | 202   | 92   | 1,134649527  | -0,864512255 | -5,531178 | 3,18E-08  | 1,24E-07    | 2,82E-08   | TRUE |
| Rv3570c | 297   | 143  | 1,054447784  | -0,944713998 | -7,431948 | 1,07E-13  | 6,49E-13    | 1,47E-13   | TRUE |
| Rv3571  | 104   | 84   | 0,308122295  | -1,691039487 | -8,958451 | 3,29E-19  | 2,73E-18    | 6,19E-19   | TRUE |
| Rv3572  | 61    | 62   | -0,023458973 | -2,022620755 | -8,691362 | 3,58E-18  | 2,79E-17    | 6,33E-18   | TRUE |
| Rv3576  | 191   | 21   | 3,185111405  | 1,185949623  | 5,1715755 | 2,32E-07  | 8,24E-07    | 1,87E-07   | TRUE |
| Rv3580c | 605   | 95   | 2,670935724  | 0,671773942  | 5,7000739 | 1,20E-08  | 4,90E-08    | 1,11E-08   | TRUE |
| Rv3581c | 1165  | 388  | 1,586201397  | -0,412960385 | -5,869399 | 4,37E-09  | 1,86E-08    | 4,21E-09   | TRUE |
| Rv3582c | 5465  | 2255 | 1,277094062  | -0,722067719 | -23,48926 | 5,25E-122 | 4,14E-120   | 9,40E-121  | TRUE |
| Rv3583c | 12781 | 5197 | 1,298249755  | -0,700912027 | -34,8352  | 7,13E-266 | 1,56E-263   | 3,55E-264  | TRUE |
| Rv3584  | 430   | 61   | 2,817455512  | 0,81829373   | 5,7065934 | 1,15E-08  | 4,73E-08    | 1,07E-08   | TRUE |
| Rv3585  | 266   | 95   | 1,485426827  | -0,513734955 | -3,549423 | 0,0003861 | 0,00091124  | 0,00020678 | TRUE |
| Rv3587c | 696   | 122  | 2,512206158  | 0,513044376  | 4,7995189 | 1,59E-06  | 5,15E-06    | 1,17E-06   | TRUE |
| Rv3588c | 73    | 168  | -1,202492864 | -3,201654646 | -18,46239 | 4,15E-76  | 1,72E-74    | 3,91E-75   | TRUE |
| Rv3592  | 551   | 191  | 1,528479681  | -0,470682101 | -4,646037 | 3,38E-06  | 1,05E-05    | 2,38E-06   | TRUE |
| Rv3593  | 599   | 86   | 2,800147438  | 0,800985656  | 6,6128771 | 3,77E-11  | 1,92E-10    | 4,36E-11   | TRUE |
| Rv3596c | 6254  | 1751 | 1,836600135  | -0,162561646 | -5,133764 | 2,84E-07  | 9,94E-07    | 2,26E-07   | TRUE |
| Rv3597c | 1049  | 206  | 2,348298435  | 0,349136654  | 4,1257227 | 3,70E-05  | 1,00E-04    | 2,27E-05   | TRUE |
| Rv3604c | 441   | 71   | 2,634887726  | 0,635725944  | 4,6341069 | 3,58E-06  | 1,11E-05    | 2,52E-06   | TRUE |
| Rv3607c | 171   | 65   | 1,395484702  | -0,60367708  | -3,396535 | 0,0006824 | 0,00153279  | 0,00034782 | TRUE |
| Rv3608c | 493   | 90   | 2,45359074   | 0,454428958  | 3,614254  | 0,0003012 | 0,000723941 | 0,00016424 | TRUE |
| Rv3609c | 413   | 48   | 3,105035471  | 1,105873689  | 7,1906175 | 6,45E-13  | 3,77E-12    | 8,55E-13   | TRUE |
| Rv3610c | 2071  | 434  | 2,254560606  | 0,255398824  | 4,31123   | 1,62E-05  | 4,61E-05    | 1,04E-05   | TRUE |
| Rv3611  | 39    | 2    | 4,285402219  | 2,286240437  | 3,7228487 | 0,000197  | 0,000483159 | 0,00010964 | TRUE |
| Rv3613c | 213   | 101  | 1,076498137  | -0,922663644 | -6,123264 | 9,17E-10  | 4,18E-09    | 9,49E-10   | TRUE |
| Rv3614c | 2013  | 1166 | 0,787779384  | -1,211382398 | -26,00327 | 4,55E-149 | 4,60E-147   | 1,04E-147  | TRUE |
| Rv3615c | 2306  | 1242 | 0,892727339  | -1,106434442 | -24,96446 | 1,49E-137 | 1,30E-135   | 2,96E-136  | TRUE |
| Rv3616c | 5039  | 2706 | 0,896975617  | -1,102186165 | -36,77698 | 4,31E-296 | 1,06E-293   | 2,41E-294  | TRUE |

|         |      |     |              |              |           |           |             |            |      |
|---------|------|-----|--------------|--------------|-----------|-----------|-------------|------------|------|
| Rv3624c | 146  | 71  | 1,040077439  | -0,959084343 | -5,302891 | 1,14E-07  | 4,16E-07    | 9,45E-08   | TRUE |
| Rv3628  | 122  | 8   | 3,930737338  | 1,931575556  | 5,915747  | 3,30E-09  | 1,43E-08    | 3,24E-09   | TRUE |
| Rv3632  | 159  | 11  | 3,853451337  | 1,854289555  | 6,5707219 | 5,01E-11  | 2,53E-10    | 5,74E-11   | TRUE |
| Rv3634c | 190  | 27  | 2,814968106  | 0,815806324  | 3,7832231 | 0,0001548 | 0,000383285 | 8,70E-05   | TRUE |
| Rv3636  | 468  | 36  | 3,700439718  | 1,701277936  | 10,621172 | 2,38E-26  | 2,81E-25    | 6,38E-26   | TRUE |
| Rv3642c | 465  | 47  | 3,306498054  | 1,307336272  | 8,7104304 | 3,03E-18  | 2,37E-17    | 5,39E-18   | TRUE |
| Rv3645  | 735  | 132 | 2,47720632   | 0,478044538  | 4,6236954 | 3,77E-06  | 1,16E-05    | 2,63E-06   | TRUE |
| Rv3646c | 1593 | 283 | 2,492872309  | 0,493710527  | 7,01243   | 2,34E-12  | 1,31E-11    | 2,98E-12   | TRUE |
| Rv3647c | 325  | 123 | 1,401781403  | -0,597380379 | -4,628878 | 3,68E-06  | 1,13E-05    | 2,57E-06   | TRUE |
| Rv3651  | 309  | 39  | 2,986060809  | 0,986899027  | 5,6660914 | 1,46E-08  | 5,90E-08    | 1,34E-08   | TRUE |
| Rv3655c | 3    | 7   | -1,222392421 | -3,221554203 | -3,778758 | 0,0001576 | 0,000389733 | 8,84E-05   | TRUE |
| Rv3658c | 42   | 37  | 0,182864057  | -1,816297725 | -6,248666 | 4,14E-10  | 1,94E-09    | 4,41E-10   | TRUE |
| Rv3660c | 64   | 32  | 1            | -0,999161782 | -3,683047 | 0,0002305 | 0,000561424 | 0,0001274  | TRUE |
| Rv3661  | 139  | 70  | 0,989658056  | -1,009503726 | -5,493997 | 3,93E-08  | 1,51E-07    | 3,43E-08   | TRUE |
| Rv3665c | 80   | 5   | 4            | 2,000838218  | 4,9029741 | 9,44E-07  | 3,10E-06    | 7,03E-07   | TRUE |
| Rv3667  | 284  | 34  | 3,062284278  | 1,063122496  | 5,7747718 | 7,71E-09  | 3,21E-08    | 7,29E-09   | TRUE |
| Rv3672c | 205  | 139 | 0,560539027  | -1,438622755 | -10,24257 | 1,28E-24  | 1,44E-23    | 3,26E-24   | TRUE |
| Rv3673c | 274  | 202 | 0,4398206    | -1,559341182 | -13,10699 | 3,00E-39  | 5,59E-38    | 1,27E-38   | TRUE |
| Rv3674c | 1653 | 115 | 3,845380958  | 1,846219176  | 21,128206 | 4,38E-99  | 2,62E-97    | 5,94E-98   | TRUE |
| Rv3675  | 170  | 11  | 3,949959318  | 1,950797536  | 7,0292832 | 2,08E-12  | 1,17E-11    | 2,66E-12   | TRUE |
| Rv3676  | 795  | 103 | 2,948310523  | 0,949148741  | 8,7990252 | 1,38E-18  | 1,09E-17    | 2,47E-18   | TRUE |
| Rv3677c | 752  | 244 | 1,623851514  | -0,375310268 | -4,25723  | 2,07E-05  | 5,79E-05    | 1,31E-05   | TRUE |
| Rv3678A | 452  | 148 | 1,610725597  | -0,388436185 | -3,423435 | 0,0006184 | 0,001404017 | 0,0003186  | TRUE |
| Rv3678c | 788  | 280 | 1,492768803  | -0,506392979 | -6,015253 | 1,80E-09  | 7,99E-09    | 1,81E-09   | TRUE |
| Rv3679  | 5920 | 870 | 2,76650987   | 0,767348088  | 20,056196 | 1,78E-89  | 9,37E-88    | 2,13E-88   | TRUE |
| Rv3680  | 1911 | 258 | 2,888884808  | 0,889723026  | 12,923443 | 3,32E-38  | 6,03E-37    | 1,37E-37   | TRUE |
| Rv3681c | 270  | 30  | 3,169925001  | 1,17076322   | 6,0861193 | 1,16E-09  | 5,24E-09    | 1,19E-09   | TRUE |
| Rv3683  | 240  | 93  | 1,367731785  | -0,631429997 | -4,229254 | 2,34E-05  | 6,52E-05    | 1,48E-05   | TRUE |
| Rv3684  | 321  | 143 | 1,16655815   | -0,832603632 | -6,678513 | 2,41E-11  | 1,25E-10    | 2,85E-11   | TRUE |
| Rv3686c | 777  | 259 | 1,584962501  | -0,414199281 | -4,808165 | 1,52E-06  | 4,94E-06    | 1,12E-06   | TRUE |
| Rv3694c | 645  | 126 | 2,355875427  | 0,356713645  | 3,3006632 | 0,0009646 | 0,002113471 | 0,00047959 | TRUE |
| Rv3696c | 230  | 28  | 3,038135129  | 1,038973347  | 5,1000398 | 3,40E-07  | 1,18E-06    | 2,68E-07   | TRUE |
| Rv3699  | 332  | 57  | 2,542149417  | 0,542987635  | 3,4898375 | 0,0004833 | 0,00112261  | 0,00025474 | TRUE |
| Rv3701c | 243  | 87  | 1,481869008  | -0,517292774 | -3,418077 | 0,0006307 | 0,001429482 | 0,00032438 | TRUE |
| Rv3703c | 301  | 216 | 0,478732175  | -1,520429607 | -13,30494 | 2,17E-40  | 4,13E-39    | 9,37E-40   | TRUE |
| Rv3704c | 303  | 166 | 0,868134552  | -1,13102723  | -9,282062 | 1,66E-20  | 1,47E-19    | 3,34E-20   | TRUE |
| Rv3705c | 80   | 45  | 0,830074999  | -1,169086783 | -4,962094 | 6,97E-07  | 2,31E-06    | 5,24E-07   | TRUE |

|         |      |     |             |              |           |           |             |            |      |
|---------|------|-----|-------------|--------------|-----------|-----------|-------------|------------|------|
| Rv3708c | 672  | 224 | 1,584962501 | -0,414199281 | -4,471347 | 7,77E-06  | 2,29E-05    | 5,20E-06   | TRUE |
| Rv3709c | 1293 | 159 | 3,023623605 | 1,024461823  | 11,955995 | 6,04E-33  | 9,34E-32    | 2,12E-32   | TRUE |
| Rv3710  | 1064 | 164 | 2,697730431 | 0,698568649  | 7,8250582 | 5,07E-15  | 3,35E-14    | 7,61E-15   | TRUE |
| Rv3711c | 617  | 114 | 2,436236665 | 0,437074883  | 3,9007428 | 9,59E-05  | 0,0002437   | 5,53E-05   | TRUE |
| Rv3713  | 101  | 54  | 0,903323981 | -1,095837801 | -5,160255 | 2,47E-07  | 8,70E-07    | 1,97E-07   | TRUE |
| Rv3715c | 495  | 71  | 2,801537595 | 0,802375814  | 6,0203013 | 1,74E-09  | 7,78E-09    | 1,76E-09   | TRUE |
| Rv3719  | 791  | 108 | 2,872646382 | 0,8734846    | 8,1838195 | 2,75E-16  | 1,95E-15    | 4,43E-16   | TRUE |
| Rv3720  | 694  | 108 | 2,68390435  | 0,684742569  | 6,2089653 | 5,33E-10  | 2,48E-09    | 5,62E-10   | TRUE |
| Rv3722c | 990  | 83  | 3,576245284 | 1,577083502  | 14,632965 | 1,73E-48  | 4,16E-47    | 9,45E-48   | TRUE |
| Rv3723  | 918  | 76  | 3,59442283  | 1,595261048  | 14,208215 | 8,15E-46  | 1,81E-44    | 4,10E-45   | TRUE |
| Rv3724A | 264  | 26  | 3,343954401 | 1,344792619  | 6,7073039 | 1,98E-11  | 1,04E-10    | 2,35E-11   | TRUE |
| Rv3725  | 488  | 183 | 1,415037499 | -0,584124283 | -5,533824 | 3,13E-08  | 1,23E-07    | 2,79E-08   | TRUE |
| Rv3729  | 160  | 101 | 0,663716612 | -1,33544517  | -8,250795 | 1,57E-16  | 1,13E-15    | 2,56E-16   | TRUE |
| Rv3732  | 181  | 24  | 2,914883386 | 0,915721604  | 4,0736154 | 4,63E-05  | 0,00012269  | 2,78E-05   | TRUE |
| Rv3733c | 290  | 105 | 1,465663572 | -0,53349821  | -3,8619   | 0,0001125 | 0,000282993 | 6,42E-05   | TRUE |
| Rv3734c | 644  | 203 | 1,665580961 | -0,333580821 | -3,476279 | 0,0005084 | 0,001176083 | 0,00026688 | TRUE |
| Rv3735  | 156  | 22  | 2,8259706   | 0,826808818  | 3,4676415 | 0,000525  | 0,001212404 | 0,0002751  | TRUE |
| Rv3736  | 244  | 33  | 2,886343218 | 0,887181436  | 4,6050935 | 4,12E-06  | 1,26E-05    | 2,87E-06   | TRUE |
| Rv3737  | 251  | 38  | 2,723616041 | 0,724454259  | 3,9230817 | 8,74E-05  | 0,00022375  | 5,08E-05   | TRUE |
| Rv3740c | 181  | 17  | 3,412383046 | 1,413221264  | 5,767446  | 8,05E-09  | 3,35E-08    | 7,60E-09   | TRUE |
| Rv3747  | 142  | 18  | 2,979822118 | 0,980660336  | 3,8207541 | 0,000133  | 0,000331685 | 7,52E-05   | TRUE |
| Rv3748  | 141  | 9   | 3,969626351 | 1,970464569  | 6,4442232 | 1,16E-10  | 5,70E-10    | 1,29E-10   | TRUE |
| Rv3749c | 231  | 89  | 1,37601561  | -0,623146171 | -4,088876 | 4,33E-05  | 0,000115827 | 2,63E-05   | TRUE |
| Rv3750c | 815  | 79  | 3,366875501 | 1,367713719  | 11,939399 | 7,38E-33  | 1,13E-31    | 2,56E-32   | TRUE |
| Rv3755c | 336  | 39  | 3,106915204 | 1,107753422  | 6,4945689 | 8,33E-11  | 4,14E-10    | 9,39E-11   | TRUE |
| Rv3759c | 485  | 63  | 2,944561014 | 0,945399232  | 6,8494731 | 7,41E-12  | 4,00E-11    | 9,09E-12   | TRUE |
| Rv3761c | 457  | 19  | 4,588122842 | 2,58896106   | 13,694428 | 1,10E-42  | 2,25E-41    | 5,11E-42   | TRUE |
| Rv3762c | 121  | 61  | 0,9881259   | -1,011035882 | -5,135048 | 2,82E-07  | 9,88E-07    | 2,24E-07   | TRUE |
| Rv3763  | 728  | 226 | 1,687615678 | -0,311546104 | -3,438835 | 0,0005842 | 0,001331123 | 0,00030206 | TRUE |
| Rv3765c | 398  | 68  | 2,549161779 | 0,549999997  | 3,8657116 | 0,0001108 | 0,000278788 | 6,33E-05   | TRUE |
| Rv3767c | 540  | 88  | 2,617383978 | 0,618222197  | 5,0020249 | 5,67E-07  | 1,90E-06    | 4,32E-07   | TRUE |
| Rv3771c | 60   | 36  | 0,736965594 | -1,262196188 | -4,714977 | 2,42E-06  | 7,62E-06    | 1,73E-06   | TRUE |
| Rv3773c | 64   | 38  | 0,752072487 | -1,247089295 | -4,798753 | 1,60E-06  | 5,17E-06    | 1,17E-06   | TRUE |
| Rv3778c | 989  | 142 | 2,800079591 | 0,800917809  | 8,4972906 | 1,94E-17  | 1,45E-16    | 3,30E-17   | TRUE |
| Rv3779  | 405  | 37  | 3,452324732 | 1,45316295   | 8,8102198 | 1,25E-18  | 9,87E-18    | 2,24E-18   | TRUE |
| Rv3780  | 685  | 133 | 2,364677742 | 0,36551596   | 3,4801264 | 0,0005012 | 0,001160683 | 0,00026338 | TRUE |
| Rv3781  | 403  | 31  | 3,700439718 | 1,701277936  | 9,8559283 | 6,46E-23  | 6,57E-22    | 1,49E-22   | TRUE |

|         |       |      |              |              |           |           |             |           |      |
|---------|-------|------|--------------|--------------|-----------|-----------|-------------|-----------|------|
| Rv3782  | 939   | 153  | 2,617593505  | 0,618431723  | 6,598625  | 4,15E-11  | 2,11E-10    | 4,79E-11  | TRUE |
| Rv3783  | 330   | 43   | 2,94005746   | 0,940895678  | 5,6272277 | 1,83E-08  | 7,34E-08    | 1,67E-08  | TRUE |
| Rv3784  | 108   | 8    | 3,754887502  | 1,75572572   | 5,2157898 | 1,83E-07  | 6,54E-07    | 1,48E-07  | TRUE |
| Rv3789  | 81    | 2    | 5,339850003  | 3,340688221  | 6,5304861 | 6,56E-11  | 3,29E-10    | 7,47E-11  | TRUE |
| Rv3790  | 242   | 27   | 3,163975735  | 1,164813953  | 5,7385106 | 9,55E-09  | 3,95E-08    | 8,95E-09  | TRUE |
| Rv3791  | 436   | 76   | 2,520256811  | 0,521095029  | 3,8526992 | 0,0001168 | 0,000293098 | 6,65E-05  | TRUE |
| Rv3795  | 734   | 118  | 2,636993203  | 0,637831422  | 5,9965528 | 2,02E-09  | 8,91E-09    | 2,02E-09  | TRUE |
| Rv3796  | 249   | 19   | 3,712074419  | 1,712912637  | 7,7842769 | 7,01E-15  | 4,57E-14    | 1,04E-14  | TRUE |
| Rv3799c | 2402  | 714  | 1,750240172  | -0,24892161  | -4,939532 | 7,83E-07  | 2,58E-06    | 5,86E-07  | TRUE |
| Rv3800c | 5761  | 2353 | 1,291817937  | -0,707343845 | -23,56736 | 8,33E-123 | 6,71E-121   | 1,52E-121 | TRUE |
| Rv3801c | 1899  | 353  | 2,427499817  | 0,428338035  | 6,7188359 | 1,83E-11  | 9,59E-11    | 2,18E-11  | TRUE |
| Rv3805c | 1230  | 408  | 1,592017258  | -0,407144524 | -5,940114 | 2,85E-09  | 1,25E-08    | 2,82E-09  | TRUE |
| Rv3806c | 444   | 207  | 1,100928909  | -0,898232873 | -8,570985 | 1,03E-17  | 7,81E-17    | 1,77E-17  | TRUE |
| Rv3808c | 1693  | 218  | 2,957181933  | 0,958020151  | 12,94293  | 2,58E-38  | 4,73E-37    | 1,07E-37  | TRUE |
| Rv3809c | 268   | 33   | 3,021695071  | 1,022533289  | 5,433639  | 5,52E-08  | 2,09E-07    | 4,74E-08  | TRUE |
| Rv3810  | 675   | 112  | 2,59138877   | 0,592226988  | 5,3816449 | 7,38E-08  | 2,76E-07    | 6,27E-08  | TRUE |
| Rv3811  | 864   | 109  | 2,986703177  | 0,987541396  | 9,4807949 | 2,52E-21  | 2,33E-20    | 5,29E-21  | TRUE |
| Rv3812  | 170   | 22   | 2,949959318  | 0,950797536  | 4,0742612 | 4,62E-05  | 0,000122433 | 2,78E-05  | TRUE |
| Rv3813c | 108   | 59   | 0,872244453  | -1,126917329 | -5,517071 | 3,45E-08  | 1,34E-07    | 3,05E-08  | TRUE |
| Rv3818  | 692   | 101  | 2,776416745  | 0,777254963  | 6,9257071 | 4,34E-12  | 2,38E-11    | 5,41E-12  | TRUE |
| Rv3819  | 87    | 2    | 5,442943496  | 3,443781714  | 6,8533648 | 7,21E-12  | 3,90E-11    | 8,86E-12  | TRUE |
| Rv3820c | 209   | 19   | 3,459431619  | 1,460269837  | 6,3518681 | 2,13E-10  | 1,02E-09    | 2,32E-10  | TRUE |
| Rv3822  | 1318  | 131  | 3,330711653  | 1,331549872  | 14,875983 | 4,72E-50  | 1,22E-48    | 2,76E-49  | TRUE |
| Rv3825c | 5683  | 3820 | 0,573080077  | -1,426081705 | -53,48113 | 0         | 0           | 0         | TRUE |
| Rv3826  | 337   | 220  | 0,615245068  | -1,383916714 | -12,51465 | 6,21E-36  | 1,06E-34    | 2,39E-35  | TRUE |
| Rv3827c | 130   | 111  | 0,227951947  | -1,771209835 | -10,63761 | 1,99E-26  | 2,37E-25    | 5,37E-26  | TRUE |
| Rv3834c | 83    | 6    | 3,790076931  | 1,790915149  | 4,6357025 | 3,56E-06  | 1,10E-05    | 2,50E-06  | TRUE |
| Rv3835  | 431   | 41   | 3,393992054  | 1,394830273  | 8,8124673 | 1,22E-18  | 9,70E-18    | 2,20E-18  | TRUE |
| Rv3836  | 80    | 5    | 4            | 2,000838218  | 4,9029741 | 9,44E-07  | 3,10E-06    | 7,03E-07  | TRUE |
| Rv3837c | 281   | 357  | -0,345353944 | -2,344515726 | -22,86671 | 9,97E-116 | 7,02E-114   | 1,59E-114 | TRUE |
| Rv3841  | 12983 | 2724 | 2,252825179  | 0,253663397  | 10,755319 | 5,59E-27  | 6,79E-26    | 1,54E-26  | TRUE |
| Rv3842c | 546   | 96   | 2,50779464   | 0,508632858  | 4,2175017 | 2,47E-05  | 6,85E-05    | 1,55E-05  | TRUE |
| Rv3848  | 43    | 39   | 0,140862536  | -1,858299246 | -6,516086 | 7,22E-11  | 3,61E-10    | 8,20E-11  | TRUE |
| Rv3849  | 530   | 91   | 2,542053909  | 0,542892127  | 4,4088509 | 1,04E-05  | 3,02E-05    | 6,85E-06  | TRUE |
| Rv3853  | 153   | 20   | 2,935459748  | 0,936297966  | 3,8158026 | 0,0001357 | 0,000337768 | 7,66E-05  | TRUE |
| Rv3854c | 1091  | 132  | 3,047041267  | 1,047879485  | 11,187513 | 4,69E-29  | 6,19E-28    | 1,41E-28  | TRUE |
| Rv3855  | 134   | 11   | 3,606657572  | 1,60749579   | 5,4577224 | 4,82E-08  | 1,84E-07    | 4,17E-08  | TRUE |

|         |       |      |              |              |           |           |             |            |      |
|---------|-------|------|--------------|--------------|-----------|-----------|-------------|------------|------|
| Rv3856c | 268   | 39   | 2,780686972  | 0,78152519   | 4,330081  | 1,49E-05  | 4,25E-05    | 9,65E-06   | TRUE |
| Rv3859c | 3466  | 1086 | 1,674247551  | -0,324914231 | -7,850488 | 4,14E-15  | 2,77E-14    | 6,29E-15   | TRUE |
| Rv3860  | 80    | 42   | 0,929610672  | -1,06955111  | -4,461989 | 8,12E-06  | 2,39E-05    | 5,42E-06   | TRUE |
| Rv3863  | 261   | 30   | 3,121015401  | 1,121853619  | 5,7826431 | 7,35E-09  | 3,08E-08    | 6,99E-09   | TRUE |
| Rv3865  | 639   | 65   | 3,297304308  | 1,298142526  | 10,155575 | 3,13E-24  | 3,46E-23    | 7,85E-24   | TRUE |
| Rv3868  | 1601  | 331  | 2,274070186  | 0,274908404  | 4,0658617 | 4,79E-05  | 0,000126672 | 2,87E-05   | TRUE |
| Rv3869  | 1433  | 230  | 2,639332843  | 0,640171061  | 8,4073821 | 4,19E-17  | 3,09E-16    | 7,00E-17   | TRUE |
| Rv3870  | 2138  | 428  | 2,320579151  | 0,321417369  | 5,4500337 | 5,04E-08  | 1,91E-07    | 4,34E-08   | TRUE |
| Rv3871  | 1718  | 331  | 2,375826914  | 0,376665132  | 5,6700188 | 1,43E-08  | 5,78E-08    | 1,31E-08   | TRUE |
| Rv3872  | 532   | 85   | 2,645891499  | 0,646729717  | 5,1681638 | 2,36E-07  | 8,38E-07    | 1,90E-07   | TRUE |
| Rv3874  | 5611  | 690  | 3,023589646  | 1,024427864  | 24,927227 | 3,77E-137 | 3,23E-135   | 7,34E-136  | TRUE |
| Rv3875  | 13311 | 768  | 4,115368838  | 2,116207056  | 65,687059 | 0         | 0           | 0          | TRUE |
| Rv3876  | 1461  | 129  | 3,501513207  | 1,502351425  | 17,156067 | 5,66E-66  | 2,03E-64    | 4,61E-65   | TRUE |
| Rv3878  | 347   | 30   | 3,531901257  | 1,532739475  | 8,4836778 | 2,18E-17  | 1,63E-16    | 3,69E-17   | TRUE |
| Rv3879c | 763   | 122  | 2,644801909  | 0,645640127  | 6,1803852 | 6,39E-10  | 2,95E-09    | 6,70E-10   | TRUE |
| Rv3884c | 340   | 117  | 1,539026217  | -0,460135565 | -3,561062 | 0,0003694 | 0,000876503 | 0,00019889 | TRUE |
| Rv3885c | 254   | 113  | 1,168505724  | -0,830656058 | -5,92474  | 3,13E-09  | 1,36E-08    | 3,08E-09   | TRUE |
| Rv3887c | 956   | 183  | 2,38516697   | 0,386005188  | 4,3266587 | 1,51E-05  | 4,31E-05    | 9,79E-06   | TRUE |
| Rv3888c | 177   | 26   | 2,767165832  | 0,76800405   | 3,4661293 | 0,000528  | 0,001216395 | 0,00027598 | TRUE |
| Rv3890c | 522   | 70   | 2,89862298   | 0,899461198  | 6,8147512 | 9,44E-12  | 5,04E-11    | 1,14E-11   | TRUE |
| Rv3891c | 107   | 4    | 4,741466986  | 2,742305205  | 6,8345438 | 8,23E-12  | 4,41E-11    | 1,00E-11   | TRUE |
| Rv3893c | 45    | 27   | 0,736965594  | -1,262196188 | -4,083262 | 4,44E-05  | 0,000118181 | 2,68E-05   | TRUE |
| Rv3897c | 117   | 11   | 3,410933101  | 1,411771319  | 4,6333551 | 3,60E-06  | 1,11E-05    | 2,52E-06   | TRUE |
| Rv3898c | 150   | 19   | 2,980891177  | 0,981729395  | 3,9304655 | 8,48E-05  | 0,00021727  | 4,93E-05   | TRUE |
| Rv3900c | 400   | 57   | 2,810966176  | 0,811804394  | 5,4663886 | 4,59E-08  | 1,76E-07    | 3,99E-08   | TRUE |
| Rv3902c | 237   | 18   | 3,718818247  | 1,719656466  | 7,6153676 | 2,63E-14  | 1,67E-13    | 3,78E-14   | TRUE |
| Rv3905c | 317   | 180  | 0,816485934  | -1,182675848 | -10,01696 | 1,28E-23  | 1,36E-22    | 3,10E-23   | TRUE |
| Rv3906c | 100   | 184  | -0,879705766 | -2,878867548 | -18,37332 | 2,15E-75  | 8,83E-74    | 2,00E-74   | TRUE |
| Rv3907c | 449   | 303  | 0,567397651  | -1,431764131 | -15,07001 | 2,55E-51  | 6,80E-50    | 1,54E-50   | TRUE |
| Rv3909  | 822   | 106  | 2,955074129  | 0,955912347  | 9,0004443 | 2,25E-19  | 1,89E-18    | 4,30E-19   | TRUE |
| Rv3915  | 1200  | 191  | 2,651389862  | 0,652228081  | 7,8216887 | 5,21E-15  | 3,44E-14    | 7,80E-15   | TRUE |
| Rv3916c | 257   | 101  | 1,347413066  | -0,651748715 | -4,533271 | 5,81E-06  | 1,74E-05    | 3,94E-06   | TRUE |
| Rv3917c | 916   | 125  | 2,873419503  | 0,874257722  | 8,8135954 | 1,21E-18  | 9,64E-18    | 2,19E-18   | TRUE |
| Rv3920c | 2219  | 629  | 1,818777745  | -0,180384037 | -3,399565 | 0,0006749 | 0,001518499 | 0,00034458 | TRUE |
| Rv3921c | 2305  | 241  | 3,257661699  | 1,258499917  | 18,833857 | 3,99E-79  | 1,81E-77    | 4,10E-78   | TRUE |
| Rv3922c | 706   | 446  | 0,662624473  | -1,336537309 | -17,35338 | 1,86E-67  | 6,73E-66    | 1,53E-66   | TRUE |
| Rv3923c | 1665  | 264  | 2,656912343  | 0,657750561  | 9,2834469 | 1,64E-20  | 1,45E-19    | 3,30E-20   | TRUE |

|         |      |     |             |              |           |           |             |            |       |
|---------|------|-----|-------------|--------------|-----------|-----------|-------------|------------|-------|
| Rv3924c | 921  | 76  | 3,599129833 | 1,599968051  | 14,26177  | 3,79E-46  | 8,49E-45    | 1,93E-45   | TRUE  |
| Rv0003  | 788  | 177 | 2,154446269 | 0,155284487  | 1,6446519 | 0,1000416 | 0,142441933 | 0,03232281 | FALSE |
| Rv0004  | 222  | 46  | 2,27085391  | 0,271692128  | 1,4966066 | 0,1344957 | 0,184504643 | 0,04186765 | FALSE |
| Rv0005  | 2207 | 514 | 2,102246365 | 0,103084583  | 1,8445024 | 0,06511   | 0,097159919 | 0,02204745 | FALSE |
| Rv0008c | 53   | 8   | 2,727920455 | 0,728758673  | 1,8119991 | 0,0699863 | 0,103458063 | 0,02347662 | FALSE |
| Rv0012  | 262  | 65  | 2,011055189 | 0,011893407  | 0,0744509 | 0,9406516 | 0,954200055 | 0,21648154 | FALSE |
| Rv0013  | 116  | 20  | 2,5360529   | 0,536891118  | 2,041728  | 0,0411785 | 0,064885368 | 0,01472374 | FALSE |
| Rv0019c | 609  | 136 | 2,162835577 | 0,163673795  | 1,5216607 | 0,1280941 | 0,177202124 | 0,04021057 | FALSE |
| Rv0022c | 6    | 0   | 3,584962501 | 1,585800719  | 1,1435548 | 0,2528083 | 0,319883217 | 0,07249462 | FALSE |
| Rv0023  | 95   | 19  | 2,321928095 | 0,322766313  | 1,1527782 | 0,2490014 | 0,316080355 | 0,0717247  | FALSE |
| Rv0026  | 144  | 28  | 2,362570079 | 0,363408298  | 1,5867864 | 0,112561  | 0,158211219 | 0,03590116 | FALSE |
| Rv0027  | 13   | 2   | 2,700439718 | 0,701277936  | 0,8676856 | 0,3855664 | 0,457551996 | 0,10381172 | FALSE |
| Rv0028  | 27   | 4   | 2,754887502 | 0,75572572   | 1,334905  | 0,1819074 | 0,240188456 | 0,05450337 | FALSE |
| Rv0029  | 215  | 45  | 2,256339753 | 0,257177971  | 1,397651  | 0,1622179 | 0,218357473 | 0,04954951 | FALSE |
| Rv0031  | 22   | 5   | 2,137503524 | 0,138341742  | 0,2454888 | 0,806078  | 0,84372919  | 0,19145836 | FALSE |
| Rv0032  | 128  | 41  | 1,642447995 | -0,356713787 | -1,663658 | 0,0961808 | 0,137341392 | 0,0311654  | FALSE |
| Rv0033  | 27   | 14  | 0,94753258  | -1,051629202 | -2,540786 | 0,0110604 | 0,019819203 | 0,00449736 | FALSE |
| Rv0034  | 6    | 1   | 2,584962501 | 0,585800719  | 0,502361  | 0,6154136 | 0,680171264 | 0,15423587 | FALSE |
| Rv0035  | 47   | 17  | 1,46712601  | -0,532035771 | -1,54993  | 0,1211582 | 0,16843424  | 0,03822096 | FALSE |
| Rv0036c | 201  | 39  | 2,365649472 | 0,36648769   | 1,8896193 | 0,0588089 | 0,089071526 | 0,02021204 | FALSE |
| Rv0037c | 217  | 67  | 1,695462042 | -0,30369974  | -1,827409 | 0,0676382 | 0,100476555 | 0,02280006 | FALSE |
| Rv0038  | 438  | 119 | 1,879969296 | -0,119192486 | -0,986936 | 0,3236741 | 0,39485643  | 0,08960051 | FALSE |
| Rv0042c | 417  | 119 | 1,80908581  | -0,190075972 | -1,554645 | 0,1200306 | 0,167575424 | 0,03802105 | FALSE |
| Rv0044c | 52   | 18  | 1,530514717 | -0,468647065 | -1,420366 | 0,1555013 | 0,210105185 | 0,0476769  | FALSE |
| Rv0045c | 159  | 40  | 1,99095486  | -0,008206921 | -0,04016  | 0,9679657 | 0,978133911 | 0,22195218 | FALSE |
| Rv0049  | 394  | 107 | 1,880584833 | -0,118576949 | -0,931106 | 0,3517986 | 0,425611554 | 0,0965295  | FALSE |
| Rv0051  | 356  | 106 | 1,747812976 | -0,251348805 | -1,919738 | 0,054891  | 0,083813403 | 0,01901887 | FALSE |
| Rv0052  | 119  | 33  | 1,850423644 | -0,148738138 | -0,64518  | 0,5188106 | 0,589594846 | 0,13377112 | FALSE |
| Rv0057  | 656  | 151 | 2,119147265 | 0,119985483  | 1,1665551 | 0,2433901 | 0,310456184 | 0,07044847 | FALSE |
| Rv0059  | 163  | 25  | 2,704871964 | 0,705710183  | 3,0895973 | 0,0020043 | 0,004158276 | 0,00094359 | FALSE |
| Rv0061c | 448  | 111 | 2,012939056 | 0,013777274  | 0,1127449 | 0,9102328 | 0,929559334 | 0,21093487 | FALSE |
| Rv0063  | 149  | 26  | 2,518728802 | 0,51956702   | 2,2460772 | 0,0246991 | 0,040826955 | 0,00926442 | FALSE |
| Rv0064  | 722  | 175 | 2,044643915 | 0,045482133  | 0,4699495 | 0,6383911 | 0,700170897 | 0,15888223 | FALSE |
| Rv0064A | 47   | 15  | 1,647698256 | -0,351463526 | -0,992343 | 0,3210302 | 0,392359237 | 0,08903385 | FALSE |
| Rv0065  | 38   | 8   | 2,247927513 | 0,248765732  | 0,5691686 | 0,5692417 | 0,638172075 | 0,14477235 | FALSE |
| Rv0067c | 12   | 1   | 3,584962501 | 1,585800719  | 1,6172323 | 0,1058281 | 0,14997707  | 0,03403268 | FALSE |
| Rv0068  | 11   | 2   | 2,459431619 | 0,460269837  | 0,5461941 | 0,5849325 | 0,652240298 | 0,14796402 | FALSE |



|         |     |      |             |              |           |           |             |            |       |
|---------|-----|------|-------------|--------------|-----------|-----------|-------------|------------|-------|
| Rv0069c | 175 | 32   | 2,451211112 | 0,45204933   | 2,1427879 | 0,0321301 | 0,05176522  | 0,01174652 | FALSE |
| Rv0071  | 17  | 0    | 5,087462841 | 3,088301059  | 2,8893671 | 0,0038602 | 0,007608474 | 0,00172651 | FALSE |
| Rv0073  | 888 | 235  | 1,91789892  | -0,081262862 | -0,951928 | 0,3411334 | 0,414360951 | 0,09402646 | FALSE |
| Rv0075  | 277 | 68   | 2,026279325 | 0,027117543  | 0,1740842 | 0,8617993 | 0,888378535 | 0,20159015 | FALSE |
| Rv0077c | 29  | 6    | 2,273018494 | 0,273856713  | 0,5449939 | 0,5857577 | 0,652606912 | 0,14804722 | FALSE |
| Rv0083  | 206 | 48   | 2,101538026 | 0,102376245  | 0,5594082 | 0,5758832 | 0,643970312 | 0,14612923 | FALSE |
| Rv0084  | 238 | 41   | 2,537265759 | 0,538103977  | 2,9306148 | 0,0033829 | 0,006758985 | 0,00153374 | FALSE |
| Rv0085  | 70  | 15   | 2,222392421 | 0,223230639  | 0,6962847 | 0,4862505 | 0,558710024 | 0,12676357 | FALSE |
| Rv0086  | 242 | 47   | 2,364274386 | 0,365112604  | 2,0661385 | 0,0388154 | 0,061654432 | 0,01398567 | FALSE |
| Rv0088  | 327 | 71   | 2,203399706 | 0,204237924  | 1,3815088 | 0,1671226 | 0,224576308 | 0,05095509 | FALSE |
| Rv0089  | 33  | 6    | 2,459431619 | 0,460269837  | 0,946041  | 0,3441277 | 0,417419515 | 0,09470594 | FALSE |
| Rv0090  | 22  | 4    | 2,459431619 | 0,460269837  | 0,7724372 | 0,4398556 | 0,513783596 | 0,1165356  | FALSE |
| Rv0092  | 254 | 82   | 1,631132682 | -0,3680291   | -2,422745 | 0,0154037 | 0,026622379 | 0,00604113 | FALSE |
| Rv0093c | 98  | 19   | 2,366782331 | 0,367620549  | 1,3232232 | 0,1857612 | 0,244580868 | 0,05549083 | FALSE |
| Rv0094c | 7   | 0    | 3,807354922 | 1,80819314   | 1,355158  | 0,1753672 | 0,233310295 | 0,05286234 | FALSE |
| Rv0095c | 28  | 4    | 2,807354922 | 0,80819314   | 1,4406217 | 0,1496916 | 0,203335171 | 0,04613271 | FALSE |
| Rv0100  | 71  | 10   | 2,827819025 | 0,828657243  | 2,3438176 | 0,0190875 | 0,032288706 | 0,00732536 | FALSE |
| Rv0102  | 523 | 118  | 2,148024087 | 0,148862305  | 1,2857911 | 0,198516  | 0,259339841 | 0,05883437 | FALSE |
| Rv0104  | 113 | 32   | 1,820178962 | -0,178982819 | -0,760521 | 0,4469433 | 0,520751686 | 0,11816856 | FALSE |
| Rv0105c | 4   | 0 NA | NA          | NA           | NA        | NA        | NA          | NA         | FALSE |
| Rv0106  | 112 | 15   | 2,900464326 | 0,901302545  | 3,1618102 | 0,0015679 | 0,00332198  | 0,00075362 | FALSE |
| Rv0109  | 90  | 17   | 2,404390255 | 0,405228473  | 1,3887057 | 0,1649223 | 0,221808487 | 0,05032403 | FALSE |
| Rv0110  | 124 | 24   | 2,36923381  | 0,370072028  | 1,4977377 | 0,1342014 | 0,184165058 | 0,04179059 | FALSE |
| Rv0111  | 295 | 70   | 2,075288127 | 0,076126345  | 0,5000674 | 0,6170276 | 0,681096243 | 0,15455382 | FALSE |
| Rv0117  | 30  | 8    | 1,906890596 | -0,092271186 | -0,198999 | 0,8422637 | 0,873606319 | 0,19821199 | FALSE |
| Rv0119  | 147 | 34   | 2,112209504 | 0,113047722  | 0,5208422 | 0,6024767 | 0,668777949 | 0,15175856 | FALSE |
| Rv0121c | 41  | 9    | 2,187627003 | 0,188465221  | 0,4526059 | 0,6508325 | 0,711836796 | 0,16152944 | FALSE |
| Rv0122  | 24  | 5    | 2,263034406 | 0,263872624  | 0,4785419 | 0,6322645 | 0,694997572 | 0,15766436 | FALSE |
| Rv0123  | 39  | 10   | 1,963474124 | -0,035687658 | -0,086899 | 0,9307515 | 0,94573846  | 0,21457858 | FALSE |
| Rv0124  | 9   | 3    | 1,584962501 | -0,414199281 | -0,517344 | 0,6049162 | 0,671013799 | 0,15224451 | FALSE |
| Rv0128  | 197 | 38   | 2,374124306 | 0,374962524  | 1,9111712 | 0,0559826 | 0,085249161 | 0,01934467 | FALSE |
| Rv0130  | 47  | 7    | 2,74723393  | 0,748072148  | 1,7457201 | 0,0808596 | 0,117765967 | 0,02672336 | FALSE |
| Rv0131c | 79  | 14   | 2,496425826 | 0,497264044  | 1,5713097 | 0,1161107 | 0,162534426 | 0,03687564 | FALSE |
| Rv0132c | 37  | 9    | 2,039528364 | 0,040366582  | 0,0944855 | 0,9247235 | 0,941310993 | 0,21357398 | FALSE |
| Rv0135c | 194 | 58   | 1,741931847 | -0,257229935 | -1,451721 | 0,1465793 | 0,199416556 | 0,04525145 | FALSE |
| Rv0136  | 224 | 39   | 2,521952703 | 0,522790921  | 2,7695371 | 0,0056136 | 0,010758037 | 0,00244121 | FALSE |
| Rv0137c | 115 | 16   | 2,845490051 | 0,846328269  | 3,0372578 | 0,0023874 | 0,004888864 | 0,00110938 | FALSE |

|         |      |      |             |              |           |           |             |            |       |
|---------|------|------|-------------|--------------|-----------|-----------|-------------|------------|-------|
| Rv0138  | 177  | 45   | 1,975752454 | -0,023409328 | -0,121181 | 0,9035475 | 0,924407605 | 0,20976584 | FALSE |
| Rv0140  | 68   | 18   | 1,91753784  | -0,081623942 | -0,264545 | 0,7913601 | 0,831856158 | 0,18857881 | FALSE |
| Rv0142  | 59   | 21   | 1,490325627 | -0,508836155 | -1,654178 | 0,0980914 | 0,13971555  | 0,03170414 | FALSE |
| Rv0149  | 530  | 129  | 2,038621294 | 0,039459512  | 0,3496722 | 0,7265847 | 0,776388532 | 0,17617747 | FALSE |
| Rv0150c | 4    | 0 NA | NA          | NA           | NA        | NA        | NA          | NA         | FALSE |
| Rv0151c | 104  | 25   | 2,056583528 | 0,057421746  | 0,2246778 | 0,82223   | 0,856770131 | 0,1944176  | FALSE |
| Rv0152c | 44   | 15   | 1,552541023 | -0,446620759 | -1,240392 | 0,2148305 | 0,278210907 | 0,06310067 | FALSE |
| Rv0153c | 179  | 41   | 2,126263773 | 0,127101991  | 0,6446302 | 0,5191669 | 0,589744866 | 0,13382444 | FALSE |
| Rv0154c | 289  | 62   | 2,220729372 | 0,22156759   | 1,4047199 | 0,1601046 | 0,2157337   | 0,04895412 | FALSE |
| Rv0157A | 51   | 9    | 2,502500341 | 0,503338559  | 1,2765751 | 0,2017523 | 0,263131982 | 0,0597097  | FALSE |
| Rv0160c | 11   | 1    | 3,459431619 | 1,460269837  | 1,4571684 | 0,1450699 | 0,197567576 | 0,0448164  | FALSE |
| Rv0161  | 78   | 19   | 2,037474705 | 0,038312924  | 0,1302551 | 0,8963646 | 0,918965979 | 0,20853103 | FALSE |
| Rv0163  | 122  | 18   | 2,760812336 | 0,761650554  | 2,8569536 | 0,0042773 | 0,008343029 | 0,00189319 | FALSE |
| Rv0166  | 1530 | 340  | 2,169925001 | 0,17076322   | 2,5138826 | 0,011941  | 0,021195038 | 0,00480956 | FALSE |
| Rv0176  | 777  | 177  | 2,134165238 | 0,135003456  | 1,4248326 | 0,1542056 | 0,208497381 | 0,04731206 | FALSE |
| Rv0178  | 609  | 124  | 2,296102108 | 0,296940326  | 2,6975859 | 0,0069844 | 0,013123667 | 0,00297801 | FALSE |
| Rv0181c | 237  | 53   | 2,160822794 | 0,161661012  | 0,9378146 | 0,3483397 | 0,421944625 | 0,09574734 | FALSE |
| Rv0182c | 208  | 61   | 1,769702381 | -0,229459401 | -1,334473 | 0,1820487 | 0,240294581 | 0,05452746 | FALSE |
| Rv0183  | 186  | 38   | 2,291231298 | 0,292069516  | 1,4674355 | 0,1422576 | 0,1939385   | 0,04400837 | FALSE |
| Rv0184  | 111  | 33   | 1,750021747 | -0,249140035 | -1,062051 | 0,2882124 | 0,357399659 | 0,0810881  | FALSE |
| Rv0185  | 225  | 52   | 2,113341473 | 0,114179691  | 0,6507138 | 0,5152313 | 0,586456594 | 0,13307827 | FALSE |
| Rv0186  | 408  | 124  | 1,718229032 | -0,28093275  | -2,308908 | 0,0209487 | 0,035009119 | 0,00794424 | FALSE |
| Rv0187  | 122  | 31   | 1,976541027 | -0,022620755 | -0,097203 | 0,922565  | 0,939720177 | 0,21324056 | FALSE |
| Rv0189c | 579  | 133  | 2,122137102 | 0,122975321  | 1,1226582 | 0,2615827 | 0,32866586  | 0,07455359 | FALSE |
| Rv0191  | 309  | 76   | 2,023535514 | 0,024373733  | 0,1653412 | 0,8686755 | 0,89476521  | 0,20303941 | FALSE |
| Rv0192  | 306  | 99   | 1,628031223 | -0,371130559 | -2,683101 | 0,0072943 | 0,013627996 | 0,00309245 | FALSE |
| Rv0192A | NA   | NA   | NA          | NA           | NA        | NA        | NA          | NA         | FALSE |
| Rv0193c | 46   | 8    | 2,523561956 | 0,524400174  | 1,2585115 | 0,2082068 | 0,270878334 | 0,06145736 | FALSE |
| Rv0195  | 4    | 0 NA | NA          | NA           | NA        | NA        | NA          | NA         | FALSE |
| Rv0199  | 116  | 26   | 2,157541277 | 0,158379495  | 0,6431291 | 0,5201403 | 0,590510513 | 0,13399818 | FALSE |
| Rv0200  | 136  | 30   | 2,180572246 | 0,181410464  | 0,7944581 | 0,4269288 | 0,500388485 | 0,11354776 | FALSE |
| Rv0201c | 229  | 42   | 2,446886365 | 0,447724583  | 2,4295973 | 0,0151156 | 0,026204819 | 0,00594638 | FALSE |
| Rv0203  | 64   | 18   | 1,830074999 | -0,169086783 | -0,53977  | 0,5893555 | 0,65587421  | 0,14883046 | FALSE |
| Rv0207c | 988  | 213  | 2,213657611 | 0,214495829  | 2,5179399 | 0,0118043 | 0,0209997   | 0,00476524 | FALSE |
| Rv0208c | 383  | 82   | 2,223648577 | 0,224486795  | 1,6376305 | 0,1014988 | 0,144464559 | 0,03278178 | FALSE |
| Rv0209  | 103  | 28   | 1,879145605 | -0,120016177 | -0,481925 | 0,6298591 | 0,69312616  | 0,15728364 | FALSE |
| Rv0214  | 65   | 13   | 2,321928095 | 0,322766313  | 0,9535364 | 0,3403184 | 0,413625772 | 0,09385963 | FALSE |

|         |      |     |             |              |           |           |             |            |       |
|---------|------|-----|-------------|--------------|-----------|-----------|-------------|------------|-------|
| Rv0215c | 119  | 21  | 2,502500341 | 0,503338559  | 1,9500327 | 0,0511722 | 0,078991485 | 0,01792469 | FALSE |
| Rv0216  | 113  | 17  | 2,732716121 | 0,733554339  | 2,6610481 | 0,0077898 | 0,014444244 | 0,00327768 | FALSE |
| Rv0217c | 50   | 6   | 3,058893689 | 1,059731907  | 2,4166195 | 0,0156654 | 0,027027238 | 0,006133   | FALSE |
| Rv0218  | 91   | 27  | 1,752907138 | -0,246254644 | -0,950005 | 0,3421099 | 0,415227377 | 0,09420857 | FALSE |
| Rv0219  | 8    | 4   | 1           | -0,999161782 | -1,302124 | 0,192874  | 0,253016808 | 0,05740483 | FALSE |
| Rv0221  | 533  | 140 | 1,928708706 | -0,070453076 | -0,638131 | 0,5233885 | 0,594027149 | 0,13479617 | FALSE |
| Rv0222  | 318  | 75  | 2,084064265 | 0,084902483  | 0,5781742 | 0,5631465 | 0,632237334 | 0,1434668  | FALSE |
| Rv0224c | 55   | 13  | 2,080919995 | 0,081758213  | 0,2316553 | 0,8168058 | 0,853146697 | 0,19358127 | FALSE |
| Rv0225  | 439  | 112 | 1,970722207 | -0,028439574 | -0,232074 | 0,8164804 | 0,8532588   | 0,19358127 | FALSE |
| Rv0226c | 208  | 36  | 2,530514717 | 0,531352935  | 2,7084686 | 0,0067595 | 0,012731266 | 0,00288897 | FALSE |
| Rv0228  | 123  | 40  | 1,62058641  | -0,378575371 | -1,737356 | 0,0823244 | 0,11981081  | 0,02718737 | FALSE |
| Rv0230c | 172  | 46  | 1,902702799 | -0,096458983 | -0,498499 | 0,6181325 | 0,681934161 | 0,15474396 | FALSE |
| Rv0231  | 358  | 82  | 2,126263773 | 0,127101991  | 0,9116897 | 0,3619321 | 0,43414238  | 0,09832204 | FALSE |
| Rv0233  | 502  | 115 | 2,126053503 | 0,126891721  | 1,0778824 | 0,2810862 | 0,349827723 | 0,07938263 | FALSE |
| Rv0234c | 156  | 39  | 2           | 0,000838218  | 0,0040565 | 0,9967634 | 1           | 0,22680161 | FALSE |
| Rv0236c | 609  | 127 | 2,261613731 | 0,262451949  | 2,3985691 | 0,0164593 | 0,028126238 | 0,00638238 | FALSE |
| Rv0237  | 284  | 68  | 2,062284278 | 0,063122496  | 0,4077588 | 0,6834508 | 0,739514338 | 0,16781001 | FALSE |
| Rv0239  | 425  | 110 | 1,949959318 | -0,049202464 | -0,396473 | 0,6917559 | 0,74665715  | 0,16943085 | FALSE |
| Rv0246  | 228  | 41  | 2,47533801  | 0,476176228  | 2,5656605 | 0,010298  | 0,018537261 | 0,00420646 | FALSE |
| Rv0247c | 919  | 243 | 1,919108548 | -0,080053234 | -0,953795 | 0,3401873 | 0,413593911 | 0,0938524  | FALSE |
| Rv0248c | 2140 | 539 | 1,989253619 | -0,009908163 | -0,178029 | 0,8587004 | 0,886574433 | 0,20118077 | FALSE |
| Rv0250c | 472  | 141 | 1,743091697 | -0,256070085 | -2,253934 | 0,0242003 | 0,040052859 | 0,00908876 | FALSE |
| Rv0251c | 86   | 22  | 1,966833136 | -0,032328646 | -0,116831 | 0,9069944 | 0,927452879 | 0,21042411 | FALSE |
| Rv0253  | 40   | 10  | 2           | 0,000838218  | 0,002054  | 0,9983611 | 1           | 0,22680161 | FALSE |
| Rv0257  | 55   | 12  | 2,196397213 | 0,197235431  | 0,5477785 | 0,583844  | 0,651579173 | 0,14785583 | FALSE |
| Rv0258c | 56   | 7   | 3           | 1,000838218  | 2,4401582 | 0,0146808 | 0,025518381 | 0,00579061 | FALSE |
| Rv0259c | 19   | 5   | 1,925999419 | -0,073162363 | -0,125155 | 0,9004007 | 0,922504347 | 0,20920151 | FALSE |
| Rv0260c | 17   | 9   | 0,91753784  | -1,081623942 | -2,084394 | 0,0371243 | 0,059158915 | 0,01342429 | FALSE |
| Rv0262c | 148  | 31  | 2,255257055 | 0,256095273  | 1,1549202 | 0,2481231 | 0,315269818 | 0,07154078 | FALSE |
| Rv0263c | 267  | 65  | 2,038328119 | 0,039166337  | 0,246337  | 0,8054214 | 0,843489598 | 0,19140254 | FALSE |
| Rv0264c | 135  | 37  | 1,867362231 | -0,13179955  | -0,607146 | 0,5437541 | 0,613785347 | 0,13927969 | FALSE |
| Rv0266c | 214  | 36  | 2,571541985 | 0,572380203  | 2,9384158 | 0,0032989 | 0,006601233 | 0,00149795 | FALSE |
| Rv0267  | 17   | 3   | 2,502500341 | 0,503338559  | 0,7370249 | 0,4611072 | 0,534569911 | 0,12130418 | FALSE |
| Rv0268c | 242  | 60  | 2,011972642 | 0,01281086   | 0,0770598 | 0,938576  | 0,952339526 | 0,21610413 | FALSE |
| Rv0272c | 214  | 37  | 2,532013621 | 0,532851839  | 2,7542935 | 0,0058819 | 0,01122313  | 0,00254674 | FALSE |
| Rv0278c | 30   | 3   | 3,321928095 | 1,322766313  | 2,2324089 | 0,0255879 | 0,042181344 | 0,00956576 | FALSE |
| Rv0279c | 65   | 16  | 2,022367813 | 0,023206031  | 0,0722096 | 0,9424351 | 0,955517758 | 0,21682533 | FALSE |

|         |      |     |             |              |           |           |             |            |       |
|---------|------|-----|-------------|--------------|-----------|-----------|-------------|------------|-------|
| Rv0283  | 1243 | 292 | 2,089786022 | 0,09062424   | 1,2192316 | 0,2227563 | 0,287014321 | 0,06512906 | FALSE |
| Rv0287  | 1204 | 306 | 1,976231834 | -0,022929948 | -0,309649 | 0,756828  | 0,802832047 | 0,18217801 | FALSE |
| Rv0292  | 647  | 127 | 2,348937215 | 0,349775433  | 3,2453805 | 0,0011729 | 0,002530671 | 0,00057426 | FALSE |
| Rv0294  | 34   | 2   | 4,087462841 | 2,088301059  | 3,2858673 | 0,0010167 | 0,002219049 | 0,00050354 | FALSE |
| Rv0298  | 881  | 216 | 2,028110707 | 0,028948925  | 0,3313802 | 0,7403573 | 0,788541498 | 0,17893521 | FALSE |
| Rv0300  | 350  | 108 | 1,69632361  | -0,302838172 | -2,313981 | 0,0206688 | 0,034585308 | 0,00784807 | FALSE |
| Rv0302  | 137  | 24  | 2,513069582 | 0,5139078    | 2,132358  | 0,0329774 | 0,052935678 | 0,01201212 | FALSE |
| Rv0303  | 126  | 41  | 1,619727919 | -0,379433863 | -1,762667 | 0,0779567 | 0,113832308 | 0,02583074 | FALSE |
| Rv0304c | 106  | 21  | 2,335603032 | 0,33644125   | 1,2662806 | 0,2054126 | 0,267640387 | 0,06073275 | FALSE |
| Rv0305c | 175  | 56  | 1,64385619  | -0,355305592 | -1,93714  | 0,0527283 | 0,080855476 | 0,01834766 | FALSE |
| Rv0306  | 16   | 4   | 2           | 0,000838218  | 0,0012991 | 0,9989635 | 1           | 0,22680161 | FALSE |
| Rv0307c | 26   | 13  | 1           | -0,999161782 | -2,347455 | 0,0189022 | 0,032037032 | 0,00726982 | FALSE |
| Rv0308  | 660  | 140 | 2,237039197 | 0,237877415  | 2,2728714 | 0,0230339 | 0,038202619 | 0,00866891 | FALSE |
| Rv0310c | 13   | 0   | 4,700439718 | 2,701277936  | 2,3633382 | 0,0181111 | 0,030782293 | 0,00698058 | FALSE |
| Rv0313  | 1448 | 333 | 2,12046752  | 0,121305738  | 1,7522089 | 0,0797379 | 0,116304077 | 0,02639163 | FALSE |
| Rv0316  | 102  | 20  | 2,350497247 | 0,351335465  | 1,2938039 | 0,1957332 | 0,256468973 | 0,05819774 | FALSE |
| Rv0317c | 514  | 100 | 2,361768359 | 0,362606578  | 2,9919945 | 0,0027716 | 0,005608641 | 0,00127271 | FALSE |
| Rv0318c | 35   | 7   | 2,321928095 | 0,322766313  | 0,699699  | 0,4841153 | 0,556905559 | 0,12635414 | FALSE |
| Rv0319  | 46   | 16  | 1,523561956 | -0,475599826 | -1,357362 | 0,1746664 | 0,232967226 | 0,05286234 | FALSE |
| Rv0322  | 79   | 12  | 2,718818247 | 0,719656466  | 2,1880772 | 0,028664  | 0,046753818 | 0,01060934 | FALSE |
| Rv0324  | 75   | 30  | 1,321928095 | -0,677233687 | -2,555781 | 0,010595  | 0,019015503 | 0,004314   | FALSE |
| Rv0325  | 32   | 4   | 3           | 1,000838218  | 1,8445772 | 0,0650991 | 0,097217241 | 0,02204745 | FALSE |
| Rv0326  | 7    | 1   | 2,807354922 | 0,80819314   | 0,7203075 | 0,4713357 | 0,544188486 | 0,12348682 | FALSE |
| Rv0327c | 15   | 0   | 4,906890596 | 2,907728814  | 2,6366199 | 0,0083737 | 0,015400193 | 0,00349216 | FALSE |
| Rv0328  | 28   | 12  | 1,222392421 | -0,776769361 | -1,822255 | 0,0684163 | 0,101365133 | 0,0230017  | FALSE |
| Rv0329c | 13   | 0   | 4,700439718 | 2,701277936  | 2,3633382 | 0,0181111 | 0,030782293 | 0,00698058 | FALSE |
| Rv0330c | 19   | 0   | 5,247927513 | 3,248765732  | 3,1251991 | 0,0017768 | 0,00372166  | 0,00084407 | FALSE |
| Rv0331  | 64   | 10  | 2,678071905 | 0,678910123  | 1,8710751 | 0,0613347 | 0,092417926 | 0,0209674  | FALSE |
| Rv0332  | 70   | 16  | 2,129283017 | 0,130121235  | 0,4124665 | 0,6799975 | 0,736788535 | 0,16715256 | FALSE |
| Rv0333  | 136  | 23  | 2,563900885 | 0,564739103  | 2,3142281 | 0,0206552 | 0,034584659 | 0,00784626 | FALSE |
| Rv0334  | 185  | 36  | 2,361456459 | 0,362294677  | 1,7934057 | 0,0729081 | 0,107094768 | 0,02430186 | FALSE |
| Rv0335c | 3    | 1   | 1,584962501 | -0,414199281 | -0,298688 | 0,7651781 | 0,809729704 | 0,18369394 | FALSE |
| Rv0340  | 198  | 51  | 1,956931278 | -0,042230504 | -0,231973 | 0,8165588 | 0,853114687 | 0,19358127 | FALSE |
| Rv0342  | 954  | 244 | 1,967108118 | -0,032053663 | -0,385887 | 0,6995801 | 0,75386446  | 0,17106633 | FALSE |
| Rv0345  | 100  | 25  | 2           | 0,000838218  | 0,0032477 | 0,9974087 | 1           | 0,22680161 | FALSE |
| Rv0347  | 127  | 37  | 1,779231321 | -0,219930461 | -0,997772 | 0,3183897 | 0,389373332 | 0,08835629 | FALSE |
| Rv0348  | 66   | 29  | 1,186413124 | -0,812748658 | -2,945644 | 0,0032228 | 0,006468616 | 0,00146785 | FALSE |

|         |     |      |              |              |           |           |             |            |       |
|---------|-----|------|--------------|--------------|-----------|-----------|-------------|------------|-------|
| Rv0354c | 9   | 4    | 1,169925001  | -0,82923678  | -1,11297  | 0,2657215 | 0,33275298  | 0,0754721  | FALSE |
| Rv0356c | 72  | 15   | 2,263034406  | 0,263872624  | 0,8288694 | 0,4071783 | 0,479233426 | 0,10874727 | FALSE |
| Rv0357c | 250 | 82   | 1,60823228   | -0,390929502 | -2,563305 | 0,0103681 | 0,018646472 | 0,00423124 | FALSE |
| Rv0358  | 16  | 10   | 0,678071905  | -1,321089877 | -2,574502 | 0,0100385 | 0,018128071 | 0,00411361 | FALSE |
| Rv0359  | 98  | 34   | 1,527247003  | -0,471914779 | -1,964635 | 0,0494565 | 0,07673344  | 0,01741229 | FALSE |
| Rv0360c | 75  | 14   | 2,421463768  | 0,422301987  | 1,3172135 | 0,1877671 | 0,246768844 | 0,05599659 | FALSE |
| Rv0361  | 412 | 79   | 2,382719779  | 0,383557997  | 2,8231559 | 0,0047553 | 0,009216253 | 0,00209134 | FALSE |
| Rv0362  | 44  | 7    | 2,652076697  | 0,652914915  | 1,4987399 | 0,1339411 | 0,183871818 | 0,04172405 | FALSE |
| Rv0366c | 6   | 2    | 1,584962501  | -0,414199281 | -0,422409 | 0,6727265 | 0,731623716 | 0,16595083 | FALSE |
| Rv0367c | 96  | 13   | 2,884522783  | 0,885361001  | 2,8834372 | 0,0039336 | 0,007741597 | 0,00175672 | FALSE |
| Rv0368c | 1   | 3    | -1,584962501 | -3,584124283 | -2,584589 | 0,0097495 | 0,017687268 | 0,00401358 | FALSE |
| Rv0369c | 37  | 15   | 1,30256277   | -0,696599012 | -1,852634 | 0,0639348 | 0,0958051   | 0,02173197 | FALSE |
| Rv0370c | 41  | 5    | 3,03562391   | 1,036462128  | 2,1489342 | 0,0316396 | 0,051152555 | 0,01160512 | FALSE |
| Rv0371c | 1   | 1    | 0            | -1,999161782 | -1,095408 | 0,273338  | 0,341207532 | 0,07737244 | FALSE |
| Rv0372c | 10  | 2    | 2,321928095  | 0,322766313  | 0,3740024 | 0,7084025 | 0,761395133 | 0,17275164 | FALSE |
| Rv0374c | 7   | 0    | 3,807354922  | 1,80819314   | 1,355158  | 0,1753672 | 0,233310295 | 0,05286234 | FALSE |
| Rv0375c | 12  | 2    | 2,584962501  | 0,585800719  | 0,7104468 | 0,4774271 | 0,550415821 | 0,12486342 | FALSE |
| Rv0376c | 48  | 7    | 2,777607579  | 0,778445797  | 1,8261877 | 0,067822  | 0,100654734 | 0,0228362  | FALSE |
| Rv0377  | 77  | 27   | 1,511899039  | -0,487262743 | -1,802876 | 0,0714077 | 0,105322338 | 0,02389966 | FALSE |
| Rv0378  | 2   | 0 NA | NA           | NA           | NA        | NA        | NA          | NA         | FALSE |
| Rv0380c | 24  | 7    | 1,777607579  | -0,221554203 | -0,437057 | 0,6620699 | 0,722124953 | 0,16381872 | FALSE |
| Rv0381c | 73  | 31   | 1,235628248  | -0,763533533 | -2,885618 | 0,0039065 | 0,007692011 | 0,00174547 | FALSE |
| Rv0382c | 379 | 104  | 1,86561432   | -0,133547462 | -1,031172 | 0,3024602 | 0,373015368 | 0,08464435 | FALSE |
| Rv0384c | 708 | 149  | 2,24843703   | 0,249275248  | 2,4620275 | 0,0138154 | 0,024152466 | 0,00548066 | FALSE |
| Rv0387c | 34  | 5    | 2,765534746  | 0,766372964  | 1,5162936 | 0,1294451 | 0,178788871 | 0,04056353 | FALSE |
| Rv0388c | 5   | 0    | 3,321928095  | 1,322766313  | 0,911373  | 0,3620989 | 0,433814702 | 0,09832204 | FALSE |
| Rv0390  | 269 | 74   | 1,862008997  | -0,137152785 | -0,892716 | 0,372009  | 0,44353193  | 0,10064591 | FALSE |
| Rv0391  | 404 | 75   | 2,429392792  | 0,43023101   | 3,1105238 | 0,0018676 | 0,003895109 | 0,00088387 | FALSE |
| Rv0393  | 12  | 4    | 1,584962501  | -0,414199281 | -0,597378 | 0,5502552 | 0,620147636 | 0,14070331 | FALSE |
| Rv0395  | 7   | 0    | 3,807354922  | 1,80819314   | 1,355158  | 0,1753672 | 0,233310295 | 0,05286234 | FALSE |
| Rv0396  | 21  | 2    | 3,392317423  | 1,393155641  | 1,9433061 | 0,0519792 | 0,08000231  | 0,01813637 | FALSE |
| Rv0397  | NA  | NA   | NA           | NA           | NA        | NA        | NA          | NA         | FALSE |
| Rv0397A | 206 | 62   | 1,732304217  | -0,266857565 | -1,554534 | 0,1200572 | 0,167553246 | 0,03802105 | FALSE |
| Rv0398c | 73  | 21   | 1,797507136  | -0,201654646 | -0,691403 | 0,4893124 | 0,561655433 | 0,12745041 | FALSE |
| Rv0399c | 117 | 25   | 2,22650853   | 0,227346748  | 0,916139  | 0,359594  | 0,432126368 | 0,09799977 | FALSE |
| Rv0401  | 61  | 15   | 2,023846742  | 0,02468496   | 0,0743914 | 0,9406989 | 0,95400272  | 0,21648154 | FALSE |
| Rv0403c | 119 | 17   | 2,807354922  | 0,80819314   | 2,9699764 | 0,0029782 | 0,006008247 | 0,00136339 | FALSE |

|         |     |     |             |              |           |           |             |            |       |
|---------|-----|-----|-------------|--------------|-----------|-----------|-------------|------------|-------|
| Rv0406c | 18  | 5   | 1,847996907 | -0,151164875 | -0,255118 | 0,7986318 | 0,837713754 | 0,19009334 | FALSE |
| Rv0408  | 250 | 70  | 1,836501268 | -0,162660514 | -1,025185 | 0,3052758 | 0,375548234 | 0,08521911 | FALSE |
| Rv0409  | 369 | 114 | 1,694586992 | -0,30457479  | -2,390318 | 0,0168338 | 0,028716466 | 0,00651632 | FALSE |
| Rv0411c | 230 | 45  | 2,353636955 | 0,354475173  | 1,9591784 | 0,0500919 | 0,077536285 | 0,01759447 | FALSE |
| Rv0413  | 109 | 28  | 1,960829403 | -0,038332379 | -0,156118 | 0,8759399 | 0,900366689 | 0,2043105  | FALSE |
| Rv0414c | 10  | 4   | 1,321928095 | -0,677233687 | -0,933217 | 0,3507078 | 0,424422093 | 0,09630953 | FALSE |
| Rv0415  | 184 | 60  | 1,61667136  | -0,382490421 | -2,148408 | 0,0316814 | 0,051188576 | 0,01161567 | FALSE |
| Rv0416  | 33  | 14  | 1,237039197 | -0,762122585 | -1,936058 | 0,0528606 | 0,081011182 | 0,01837942 | FALSE |
| Rv0417  | 30  | 8   | 1,906890596 | -0,092271186 | -0,198999 | 0,8422637 | 0,873606319 | 0,19821199 | FALSE |
| Rv0419  | 550 | 116 | 2,245306813 | 0,246145031  | 2,1438137 | 0,0320478 | 0,05167481  | 0,01172601 | FALSE |
| Rv0420c | 18  | 3   | 2,584962501 | 0,585800719  | 0,8701173 | 0,3842363 | 0,456385479 | 0,10354704 | FALSE |
| Rv0421c | 189 | 46  | 2,038680468 | 0,039518686  | 0,2091021 | 0,8343686 | 0,866899253 | 0,19671609 | FALSE |
| Rv0422c | 177 | 54  | 1,712718048 | -0,286443734 | -1,551969 | 0,1206695 | 0,168348309 | 0,03819464 | FALSE |
| Rv0424c | 323 | 60  | 2,428499759 | 0,429337977  | 2,7758768 | 0,0055053 | 0,010560762 | 0,00239644 | FALSE |
| Rv0426c | 434 | 129 | 1,750323977 | -0,248837805 | -2,097602 | 0,0359403 | 0,05736492  | 0,0130172  | FALSE |
| Rv0427c | 143 | 43  | 1,733606582 | -0,2655552   | -1,288556 | 0,1975526 | 0,258423726 | 0,05860591 | FALSE |
| Rv0428c | 62  | 8   | 2,95419631  | 0,955034529  | 2,4695777 | 0,0135273 | 0,023717063 | 0,00538066 | FALSE |
| Rv0431  | 375 | 69  | 2,442222329 | 0,443060547  | 3,0792931 | 0,0020749 | 0,004286801 | 0,00097276 | FALSE |
| Rv0432  | 403 | 98  | 2,039926184 | 0,040764403  | 0,3149134 | 0,7528274 | 0,799663664 | 0,18145905 | FALSE |
| Rv0433  | 507 | 108 | 2,230954435 | 0,231792653  | 1,9430937 | 0,0520048 | 0,079932609 | 0,01813824 | FALSE |
| Rv0436c | 357 | 77  | 2,212993723 | 0,213831941  | 1,5087991 | 0,1313501 | 0,181008018 | 0,0410742  | FALSE |
| Rv0438c | 98  | 14  | 2,807354922 | 0,80819314   | 2,6951974 | 0,0070347 | 0,013211826 | 0,00299802 | FALSE |
| Rv0441c | 41  | 7   | 2,550197083 | 0,551035301  | 1,2427442 | 0,2139621 | 0,277405163 | 0,06292787 | FALSE |
| Rv0442c | 53  | 20  | 1,40599236  | -0,593169422 | -1,85456  | 0,063659  | 0,095482482 | 0,02166269 | FALSE |
| Rv0446c | 227 | 38  | 2,578620974 | 0,579459192  | 3,0600327 | 0,0022131 | 0,004560385 | 0,00103484 | FALSE |
| Rv0448c | 14  | 1   | 3,807354922 | 1,80819314   | 1,9164848 | 0,0553034 | 0,084394139 | 0,01914695 | FALSE |
| Rv0449c | 166 | 33  | 2,330645312 | 0,33148353   | 1,5626568 | 0,1181333 | 0,165102027 | 0,03745933 | FALSE |
| Rv0454  | 3   | 0   | NA          | NA           | NA        | NA        | NA          | NA         | FALSE |
| Rv0456A | 20  | 0   | 5,321928095 | 3,322766313  | 3,2376375 | 0,0012052 | 0,002592561 | 0,00058782 | FALSE |
| Rv0456B | 57  | 11  | 2,373458396 | 0,374296614  | 1,0262819 | 0,3047587 | 0,375087661 | 0,08510132 | FALSE |
| Rv0456c | 34  | 6   | 2,502500341 | 0,503338559  | 1,0423149 | 0,2972657 | 0,367528517 | 0,08339928 | FALSE |
| Rv0457c | 94  | 19  | 2,306661338 | 0,307499556  | 1,0953504 | 0,2733632 | 0,340969123 | 0,07737244 | FALSE |
| Rv0460  | 336 | 111 | 1,597901556 | -0,401260225 | -3,055748 | 0,002245  | 0,004613997 | 0,001047   | FALSE |
| Rv0463  | 289 | 51  | 2,502500341 | 0,503338559  | 3,0390315 | 0,0023734 | 0,004862697 | 0,00110344 | FALSE |
| Rv0464c | 143 | 31  | 2,205675026 | 0,206513245  | 0,9233506 | 0,3558245 | 0,429954657 | 0,09741892 | FALSE |
| Rv0465c | 225 | 49  | 2,199071347 | 0,199909565  | 1,122489  | 0,2616546 | 0,328546832 | 0,07455359 | FALSE |
| Rv0470c | 513 | 104 | 2,302375297 | 0,303213516  | 2,5253503 | 0,0115583 | 0,020608472 | 0,00467472 | FALSE |

|         |     |     |             |              |           |           |             |            |       |
|---------|-----|-----|-------------|--------------|-----------|-----------|-------------|------------|-------|
| Rv0471c | 89  | 30  | 1,568842835 | -0,430318947 | -1,694958 | 0,0900835 | 0,129478572 | 0,02938118 | FALSE |
| Rv0473  | 413 | 87  | 2,247054476 | 0,247892694  | 1,8702777 | 0,0614453 | 0,092425684 | 0,02097316 | FALSE |
| Rv0476  | 381 | 99  | 1,944290567 | -0,054871214 | -0,419045 | 0,6751831 | 0,732981639 | 0,16632761 | FALSE |
| Rv0477  | 262 | 61  | 2,102685664 | 0,103523882  | 0,6378339 | 0,5235818 | 0,594075588 | 0,13480716 | FALSE |
| Rv0478  | 152 | 42  | 1,855610091 | -0,143551691 | -0,703119 | 0,4819813 | 0,554693369 | 0,12587058 | FALSE |
| Rv0480c | 49  | 6   | 3,029747343 | 1,030585562  | 2,3383138 | 0,019371  | 0,032719109 | 0,00742421 | FALSE |
| Rv0481c | 88  | 28  | 1,652076697 | -0,347085085 | -1,339943 | 0,180264  | 0,238257825 | 0,05406528 | FALSE |
| Rv0488  | 22  | 1   | 4,459431619 | 2,460269837  | 2,9195587 | 0,0035053 | 0,006975176 | 0,00158121 | FALSE |
| Rv0491  | 601 | 151 | 1,992816441 | -0,00634534  | -0,060356 | 0,9518721 | 0,963846838 | 0,21871536 | FALSE |
| Rv0492A | 15  | 3   | 2,321928095 | 0,322766313  | 0,4580582 | 0,6469107 | 0,708136443 | 0,16068976 | FALSE |
| Rv0494  | 15  | 0   | 4,906890596 | 2,907728814  | 2,6366199 | 0,0083737 | 0,015400193 | 0,00349216 | FALSE |
| Rv0499  | 173 | 55  | 1,653268514 | -0,345893268 | -1,871959 | 0,0612123 | 0,092286401 | 0,02094156 | FALSE |
| Rv0500  | 319 | 79  | 2,013631866 | 0,014470084  | 0,0999063 | 0,9204187 | 0,938746174 | 0,21296494 | FALSE |
| Rv0504c | 367 | 75  | 2,290817562 | 0,29165578   | 2,058598  | 0,0395328 | 0,062466841 | 0,01417493 | FALSE |
| Rv0513  | 376 | 121 | 1,635725614 | -0,363436167 | -2,908723 | 0,0036291 | 0,007188892 | 0,0016313  | FALSE |
| Rv0515  | 588 | 177 | 1,732066795 | -0,267094987 | -2,629128 | 0,0085604 | 0,015725331 | 0,00356838 | FALSE |
| Rv0516c | 613 | 146 | 2,069918705 | 0,070756923  | 0,6706945 | 0,5024152 | 0,574688371 | 0,13040783 | FALSE |
| Rv0519c | 188 | 36  | 2,38466385  | 0,385502068  | 1,9159757 | 0,0553682 | 0,084411337 | 0,01915455 | FALSE |
| Rv0520  | 18  | 0   | 5,169925001 | 3,17076322   | 3,0092122 | 0,0026193 | 0,005333178 | 0,00120895 | FALSE |
| Rv0521  | NA  | NA  | NA          | NA           | NA        | NA        | NA          | NA         | FALSE |
| Rv0522  | 144 | 38  | 1,921997488 | -0,077164294 | -0,363663 | 0,7161097 | 0,767482817 | 0,17407992 | FALSE |
| Rv0523c | 17  | 5   | 1,765534746 | -0,233627036 | -0,388694 | 0,6975026 | 0,752242314 | 0,17069823 | FALSE |
| Rv0524  | 296 | 83  | 1,834413934 | -0,164747848 | -1,130262 | 0,258366  | 0,325557606 | 0,07387527 | FALSE |
| Rv0528  | 404 | 99  | 2,028854863 | 0,029693081  | 0,2301108 | 0,8180057 | 0,853947672 | 0,19377713 | FALSE |
| Rv0531  | 51  | 24  | 1,087462841 | -0,911698941 | -2,954835 | 0,0031284 | 0,006288623 | 0,00142701 | FALSE |
| Rv0532  | 335 | 110 | 1,606657572 | -0,39250421  | -2,98009  | 0,0028816 | 0,005825315 | 0,00132188 | FALSE |
| Rv0533c | 202 | 34  | 2,570748642 | 0,57158686   | 2,8512688 | 0,0043545 | 0,008468543 | 0,00192167 | FALSE |
| Rv0534c | 56  | 20  | 1,485426827 | -0,513734955 | -1,628469 | 0,1034254 | 0,146941535 | 0,03334386 | FALSE |
| Rv0535  | 71  | 13  | 2,449307401 | 0,450145619  | 1,3595296 | 0,1739788 | 0,232207264 | 0,05269229 | FALSE |
| Rv0536  | 75  | 28  | 1,421463768 | -0,577698013 | -2,142865 | 0,032124  | 0,051776405 | 0,01174652 | FALSE |
| Rv0538  | 151 | 31  | 2,284208429 | 0,285046647  | 1,2919489 | 0,1963748 | 0,257138906 | 0,05834976 | FALSE |
| Rv0539  | 69  | 28  | 1,301169535 | -0,697992247 | -2,53566  | 0,0112236 | 0,020066072 | 0,00455338 | FALSE |
| Rv0540  | 27  | 11  | 1,295455884 | -0,703705898 | -1,600708 | 0,1094415 | 0,15468099  | 0,0350938  | FALSE |
| Rv0541c | 215 | 74  | 1,538739484 | -0,460422298 | -2,833564 | 0,0046032 | 0,00894337  | 0,00202942 | FALSE |
| Rv0543c | 477 | 132 | 1,853451337 | -0,145710445 | -1,264894 | 0,2059093 | 0,268198918 | 0,06085949 | FALSE |
| Rv0548c | 251 | 68  | 1,884080713 | -0,115081069 | -0,720792 | 0,4710376 | 0,544162959 | 0,12348103 | FALSE |
| Rv0550c | 49  | 11  | 2,155278225 | 0,156116444  | 0,4121727 | 0,6802128 | 0,736617058 | 0,16715256 | FALSE |

|         |     |     |             |              |           |           |             |            |       |
|---------|-----|-----|-------------|--------------|-----------|-----------|-------------|------------|-------|
| Rv0551c | 179 | 38  | 2,235888264 | 0,236726482  | 1,1780243 | 0,2387869 | 0,304979142 | 0,06920563 | FALSE |
| Rv0553  | 64  | 10  | 2,678071905 | 0,678910123  | 1,8710751 | 0,0613347 | 0,092417926 | 0,0209674  | FALSE |
| Rv0555  | 409 | 121 | 1,757093796 | -0,242067986 | -1,978553 | 0,0478663 | 0,074412572 | 0,01688564 | FALSE |
| Rv0556  | 320 | 66  | 2,277533976 | 0,278372194  | 1,838922  | 0,0659267 | 0,098267105 | 0,02229869 | FALSE |
| Rv0557  | 133 | 31  | 2,101086125 | 0,101924343  | 0,4475329 | 0,6544904 | 0,715044315 | 0,16225729 | FALSE |
| Rv0561c | 130 | 23  | 2,498805857 | 0,499644075  | 2,0245096 | 0,0429177 | 0,067383594 | 0,01529063 | FALSE |
| Rv0566c | 143 | 23  | 2,636309381 | 0,637147599  | 2,643918  | 0,0081952 | 0,015114363 | 0,00342894 | FALSE |
| Rv0571c | 151 | 29  | 2,380423744 | 0,381261962  | 1,6994617 | 0,0892322 | 0,128489182 | 0,02915666 | FALSE |
| Rv0573c | 19  | 2   | 3,247927513 | 1,248765732  | 1,6988539 | 0,0893467 | 0,128560168 | 0,02916213 | FALSE |
| Rv0574c | 49  | 15  | 1,707819249 | -0,291342533 | -0,831209 | 0,4058557 | 0,477890675 | 0,10842639 | FALSE |
| Rv0575c | 63  | 24  | 1,392317423 | -0,606844359 | -2,073493 | 0,0381264 | 0,060706714 | 0,01377552 | FALSE |
| Rv0576  | 146 | 39  | 1,90442234  | -0,094739442 | -0,450953 | 0,6520231 | 0,712743677 | 0,16173523 | FALSE |
| Rv0579  | 120 | 44  | 1,447458977 | -0,551702805 | -2,576971 | 0,009967  | 0,018015587 | 0,00408808 | FALSE |
| Rv0580c | 239 | 65  | 1,878498995 | -0,120662787 | -0,738176 | 0,4604075 | 0,53422978  | 0,12119646 | FALSE |
| Rv0583c | 85  | 13  | 2,708951218 | 0,709789436  | 2,2423636 | 0,0249379 | 0,041204441 | 0,00935008 | FALSE |
| Rv0585c | 105 | 25  | 2,070389328 | 0,071227546  | 0,2793642 | 0,7799653 | 0,821630159 | 0,18644367 | FALSE |
| Rv0587  | 166 | 30  | 2,468148836 | 0,468987054  | 2,1588052 | 0,0308653 | 0,050013419 | 0,01134641 | FALSE |
| Rv0590A | 8   | 0   | 4           | 2,000838218  | 1,5504405 | 0,1210358 | 0,168501698 | 0,03819582 | FALSE |
| Rv0591  | 18  | 1   | 4,169925001 | 2,17076322   | 2,4499615 | 0,0142871 | 0,024872438 | 0,00564279 | FALSE |
| Rv0592  | 23  | 2   | 3,523561956 | 1,524400174  | 2,175293  | 0,0296082 | 0,048035622 | 0,01089572 | FALSE |
| Rv0593  | 34  | 3   | 3,502500341 | 1,503338559  | 2,6178032 | 0,0088498 | 0,016219119 | 0,00368043 | FALSE |
| Rv0595c | 23  | 1   | 4,523561956 | 2,524400174  | 3,0291375 | 0,0024525 | 0,005014401 | 0,00113786 | FALSE |
| Rv0596c | 14  | 0   | 4,807354922 | 2,80819314   | 2,5028209 | 0,0123208 | 0,021780899 | 0,00494029 | FALSE |
| Rv0598c | 84  | 12  | 2,807354922 | 0,80819314   | 2,4952603 | 0,0125865 | 0,022205797 | 0,0050378  | FALSE |
| Rv0600c | 4   | 2   | 1           | -0,999161782 | -0,920739 | 0,3571866 | 0,429888289 | 0,09752015 | FALSE |
| Rv0601c | NA  | NA  | NA          | NA           | NA        | NA        | NA          | NA         | FALSE |
| Rv0602c | 9   | 1   | 3,169925001 | 1,17076322   | 1,1111126 | 0,2665199 | 0,333382309 | 0,07565085 | FALSE |
| Rv0603  | 3   | 0   | NA          | NA           | NA        | NA        | NA          | NA         | FALSE |
| Rv0604  | 60  | 6   | 3,321928095 | 1,322766313  | 3,1571202 | 0,0015934 | 0,003364131 | 0,00076339 | FALSE |
| Rv0606  | 123 | 36  | 1,772589504 | -0,226572278 | -1,012752 | 0,3111788 | 0,381738496 | 0,0866238  | FALSE |
| Rv0607  | 22  | 1   | 4,459431619 | 2,460269837  | 2,9195587 | 0,0035053 | 0,006975176 | 0,00158121 | FALSE |
| Rv0609  | 370 | 102 | 1,858956119 | -0,140205663 | -1,070884 | 0,2842218 | 0,352894937 | 0,08006604 | FALSE |
| Rv0609A | 85  | 22  | 1,949959318 | -0,049202464 | -0,177291 | 0,8592801 | 0,886940817 | 0,20126391 | FALSE |
| Rv0610c | 112 | 27  | 2,05246742  | 0,053305638  | 0,2166008 | 0,8285195 | 0,862184931 | 0,19558153 | FALSE |
| Rv0611c | 362 | 66  | 2,455451768 | 0,456289986  | 3,1086394 | 0,0018795 | 0,003917963 | 0,00088906 | FALSE |
| Rv0612  | 16  | 8   | 1           | -0,999161782 | -1,841487 | 0,0655502 | 0,097742846 | 0,02217973 | FALSE |
| Rv0614  | 3   | 0   | NA          | NA           | NA        | NA        | NA          | NA         | FALSE |



|         |      |      |             |              |           |           |             |            |       |
|---------|------|------|-------------|--------------|-----------|-----------|-------------|------------|-------|
| Rv0616A | 29   | 13   | 1,157541277 | -0,841620505 | -2,032049 | 0,0421487 | 0,066347853 | 0,0150526  | FALSE |
| Rv0616c | 1    | 0 NA | NA          | NA           | NA        | NA        | NA          | NA         | FALSE |
| Rv0618  | 38   | 8    | 2,247927513 | 0,248765732  | 0,5691686 | 0,5692417 | 0,638172075 | 0,14477235 | FALSE |
| Rv0619  | 8    | 0    | 4           | 2,000838218  | 1,5504405 | 0,1210358 | 0,168501698 | 0,03819582 | FALSE |
| Rv0620  | 5    | 0    | 3,321928095 | 1,322766313  | 0,911373  | 0,3620989 | 0,433814702 | 0,09832204 | FALSE |
| Rv0621  | 63   | 15   | 2,070389328 | 0,071227546  | 0,216392  | 0,8286822 | 0,862013064 | 0,19558153 | FALSE |
| Rv0622  | 23   | 3    | 2,938599455 | 0,939437673  | 1,4835765 | 0,1379213 | 0,188580907 | 0,04278521 | FALSE |
| Rv0623  | 26   | 9    | 1,530514717 | -0,468647065 | -1,004341 | 0,3152141 | 0,385848715 | 0,08755649 | FALSE |
| Rv0624  | 81   | 30   | 1,432959407 | -0,566202375 | -2,178278 | 0,0293854 | 0,047772443 | 0,01084048 | FALSE |
| Rv0625c | 60   | 19   | 1,658963082 | -0,3401987   | -1,083166 | 0,2787348 | 0,347010804 | 0,07874342 | FALSE |
| Rv0626  | 133  | 30   | 2,14839184  | 0,149230058  | 0,6498946 | 0,5157603 | 0,586889367 | 0,13317647 | FALSE |
| Rv0631c | 124  | 31   | 2           | 0,000838218  | 0,0036166 | 0,9971144 | 1           | 0,22680161 | FALSE |
| Rv0634A | 885  | 189  | 2,227291221 | 0,228129439  | 2,5284975 | 0,0114552 | 0,020433863 | 0,00463684 | FALSE |
| Rv0634c | 423  | 112  | 1,917158931 | -0,082002851 | -0,66298  | 0,5073432 | 0,57931717  | 0,13145819 | FALSE |
| Rv0639  | 1388 | 297  | 2,224472732 | 0,22531095   | 3,1293708 | 0,0017518 | 0,003673122 | 0,0008335  | FALSE |
| Rv0641  | 2058 | 542  | 1,924878226 | -0,074283556 | -1,323566 | 0,1856471 | 0,244553117 | 0,05549083 | FALSE |
| Rv0646c | 370  | 102  | 1,858956119 | -0,140205663 | -1,070884 | 0,2842218 | 0,352894937 | 0,08006604 | FALSE |
| Rv0647c | 302  | 67   | 2,172315549 | 0,173153767  | 1,131659  | 0,2577778 | 0,324920338 | 0,07373067 | FALSE |
| Rv0648  | 31   | 8    | 1,95419631  | -0,044965471 | -0,097774 | 0,9221117 | 0,939501053 | 0,21319084 | FALSE |
| Rv0649  | 3    | 0 NA | NA          | NA           | NA        | NA        | NA          | NA         | FALSE |
| Rv0650  | 5    | 1    | 2,321928095 | 0,322766313  | 0,2644593 | 0,791426  | 0,831371461 | 0,18857881 | FALSE |
| Rv0653c | 20   | 3    | 2,736965594 | 0,737803812  | 1,1251444 | 0,2605278 | 0,327601404 | 0,0743272  | FALSE |
| Rv0654  | 171  | 32   | 2,417852515 | 0,418690733  | 1,9732222 | 0,0484703 | 0,075232848 | 0,01707178 | FALSE |
| Rv0656c | 32   | 3    | 3,415037499 | 1,415875717  | 2,4284156 | 0,015165  | 0,02627304  | 0,00596055 | FALSE |
| Rv0657c | 29   | 3    | 3,273018494 | 1,273856713  | 2,1317209 | 0,0330298 | 0,052998172 | 0,0120263  | FALSE |
| Rv0658c | 127  | 34   | 1,901221846 | -0,097939936 | -0,435035 | 0,6635368 | 0,722925151 | 0,1640456  | FALSE |
| Rv0662c | 6    | 1    | 2,584962501 | 0,585800719  | 0,502361  | 0,6154136 | 0,680171264 | 0,15423587 | FALSE |
| Rv0666  | 27   | 2    | 3,754887502 | 1,75572572   | 2,6078618 | 0,009111  | 0,016643667 | 0,00377327 | FALSE |
| Rv0671  | 175  | 50   | 1,807354922 | -0,19180686  | -1,016523 | 0,3093804 | 0,379886824 | 0,08620362 | FALSE |
| Rv0674  | 60   | 25   | 1,263034406 | -0,736127376 | -2,510228 | 0,0120653 | 0,021386828 | 0,00485308 | FALSE |
| Rv0676c | 660  | 176  | 1,906890596 | -0,092271186 | -0,933562 | 0,3505299 | 0,424467295 | 0,09629149 | FALSE |
| Rv0680c | 70   | 8    | 3,129283017 | 1,130121235  | 3,0123511 | 0,0025923 | 0,005291995 | 0,00120086 | FALSE |
| Rv0689c | NA   | NA   | NA          | NA           | NA        | NA        | NA          | NA         | FALSE |
| Rv0690c | 485  | 125  | 1,956056652 | -0,043105129 | -0,370665 | 0,7108874 | 0,763337809 | 0,17321601 | FALSE |
| Rv0691c | 139  | 33   | 2,074546953 | 0,075385171  | 0,3399481 | 0,7338956 | 0,782504505 | 0,17755967 | FALSE |
| Rv0698  | 91   | 22   | 2,048363022 | 0,04920124   | 0,1803354 | 0,8568893 | 0,884936215 | 0,20080903 | FALSE |
| Rv0699  | 6    | 0    | 3,584962501 | 1,585800719  | 1,1435548 | 0,2528083 | 0,319883217 | 0,07249462 | FALSE |

|         |      |     |             |              |           |           |             |            |       |
|---------|------|-----|-------------|--------------|-----------|-----------|-------------|------------|-------|
| Rv0702  | 1348 | 385 | 1,807890146 | -0,191271636 | -2,814143 | 0,0048908 | 0,009464737 | 0,00214773 | FALSE |
| Rv0706  | 643  | 190 | 1,758819319 | -0,240342463 | -2,462559 | 0,0137949 | 0,024138075 | 0,00547739 | FALSE |
| Rv0711  | 361  | 115 | 1,650364976 | -0,348796806 | -2,728364 | 0,0063649 | 0,012063084 | 0,00273735 | FALSE |
| Rv0712  | 132  | 51  | 1,371968777 | -0,627193004 | -3,113045 | 0,0018517 | 0,003864032 | 0,00087682 | FALSE |
| Rv0718  | 833  | 215 | 1,953979836 | -0,045181946 | -0,509412 | 0,6104634 | 0,675931373 | 0,15338181 | FALSE |
| Rv0720  | 608  | 148 | 2,038474148 | 0,039312366  | 0,3731412 | 0,7090434 | 0,76177257  | 0,17286083 | FALSE |
| Rv0724A | 25   | 3   | 3,058893689 | 1,059731907  | 1,7087995 | 0,0874881 | 0,126369903 | 0,02866001 | FALSE |
| Rv0725c | 44   | 11  | 2           | 0,000838218  | 0,0021543 | 0,9982811 | 1           | 0,22680161 | FALSE |
| Rv0727c | 18   | 0   | 5,169925001 | 3,17076322   | 3,0092122 | 0,0026193 | 0,005333178 | 0,00120895 | FALSE |
| Rv0728c | 8    | 1   | 3           | 1,000838218  | 0,9222841 | 0,3563804 | 0,429901931 | 0,09741892 | FALSE |
| Rv0729  | 56   | 10  | 2,485426827 | 0,486265045  | 1,296145  | 0,1949255 | 0,255495596 | 0,05797686 | FALSE |
| Rv0734  | 439  | 101 | 2,119865647 | 0,120703865  | 0,959838  | 0,3371368 | 0,410264533 | 0,0930969  | FALSE |
| Rv0735  | 127  | 23  | 2,465122731 | 0,465960949  | 1,8770401 | 0,0605126 | 0,091301332 | 0,02071803 | FALSE |
| Rv0736  | 38   | 9   | 2,078002512 | 0,07884073   | 0,1857759 | 0,8526205 | 0,881335399 | 0,19996573 | FALSE |
| Rv0737  | 25   | 3   | 3,058893689 | 1,059731907  | 1,7087995 | 0,0874881 | 0,126369903 | 0,02866001 | FALSE |
| Rv0738  | 36   | 12  | 1,584962501 | -0,414199281 | -1,034697 | 0,3008105 | 0,371096889 | 0,08420901 | FALSE |
| Rv0739  | 48   | 13  | 1,884522783 | -0,114638999 | -0,313951 | 0,753558  | 0,800224177 | 0,18158624 | FALSE |
| Rv0740  | 116  | 36  | 1,688055994 | -0,311105788 | -1,370383 | 0,1705673 | 0,228582256 | 0,05184624 | FALSE |
| Rv0741  | 72   | 27  | 1,415037499 | -0,584124283 | -2,125289 | 0,0335625 | 0,053765454 | 0,01220041 | FALSE |
| Rv0742  | 14   | 5   | 1,485426827 | -0,513734955 | -0,814223 | 0,4155172 | 0,487738087 | 0,11067714 | FALSE |
| Rv0743c | 48   | 14  | 1,777607579 | -0,221554203 | -0,618097 | 0,5365116 | 0,606304228 | 0,13758208 | FALSE |
| Rv0744c | 160  | 40  | 2           | 0,000838218  | 0,0041082 | 0,9967222 | 1           | 0,22680161 | FALSE |
| Rv0745  | 10   | 0   | 4,321928095 | 2,322766313  | 1,903164  | 0,0570192 | 0,086593586 | 0,01963463 | FALSE |
| Rv0746  | 76   | 14  | 2,440572591 | 0,44141081   | 1,3813832 | 0,1671612 | 0,224551671 | 0,05095509 | FALSE |
| Rv0747  | 310  | 72  | 2,106199404 | 0,107037622  | 0,7169271 | 0,4734191 | 0,546274101 | 0,12396009 | FALSE |
| Rv0748  | 70   | 10  | 2,807354922 | 0,80819314   | 2,2778437 | 0,0227359 | 0,037811666 | 0,00857838 | FALSE |
| Rv0749A | 30   | 9   | 1,736965594 | -0,262196188 | -0,58237  | 0,5603174 | 0,629419528 | 0,14282738 | FALSE |
| Rv0750  | 87   | 19  | 2,195015982 | 0,195854201  | 0,684288  | 0,4937933 | 0,56630444  | 0,12850536 | FALSE |
| Rv0753c | 272  | 62  | 2,133266531 | 0,134104749  | 0,8374221 | 0,4023554 | 0,474406435 | 0,10765193 | FALSE |
| Rv0754  | 64   | 22  | 1,540568381 | -0,458593401 | -1,539272 | 0,1237378 | 0,171717785 | 0,03896606 | FALSE |
| Rv0755A | 245  | 52  | 2,236198221 | 0,237036439  | 1,3799499 | 0,1676021 | 0,22506726  | 0,05107208 | FALSE |
| Rv0756c | 81   | 14  | 2,532495081 | 0,533333299  | 1,6958522 | 0,0899139 | 0,129281911 | 0,02933655 | FALSE |
| Rv0760c | 195  | 45  | 2,115477217 | 0,116315436  | 0,6168793 | 0,5373144 | 0,607037469 | 0,13774846 | FALSE |
| Rv0763c | 28   | 2   | 3,807354922 | 1,80819314   | 2,7103247 | 0,0067217 | 0,012684465 | 0,00287534 | FALSE |
| Rv0765c | 75   | 9   | 3,058893689 | 1,059731907  | 2,9597571 | 0,0030788 | 0,00620483  | 0,001408   | FALSE |
| Rv0767c | 18   | 3   | 2,584962501 | 0,585800719  | 0,8701173 | 0,3842363 | 0,456385479 | 0,10354704 | FALSE |
| Rv0769  | 69   | 12  | 2,523561956 | 0,524400174  | 1,5413641 | 0,1232282 | 0,171070759 | 0,03881924 | FALSE |

|         |      |      |             |              |           |           |             |            |       |
|---------|------|------|-------------|--------------|-----------|-----------|-------------|------------|-------|
| Rv0770  | 21   | 8    | 1,392317423 | -0,606844359 | -1,197114 | 0,2312621 | 0,296617179 | 0,06730814 | FALSE |
| Rv0771  | 11   | 2    | 2,459431619 | 0,460269837  | 0,5461941 | 0,5849325 | 0,652240298 | 0,14796402 | FALSE |
| Rv0772  | 205  | 42   | 2,287162677 | 0,288000895  | 1,5201815 | 0,1284654 | 0,177591081 | 0,04029883 | FALSE |
| Rv0773c | 368  | 72   | 2,353636955 | 0,354475173  | 2,4782735 | 0,013202  | 0,023193161 | 0,00526297 | FALSE |
| Rv0774c | 110  | 30   | 1,874469118 | -0,124692664 | -0,517859 | 0,6045568 | 0,670898118 | 0,15223967 | FALSE |
| Rv0776c | 19   | 6    | 1,662965013 | -0,336196769 | -0,601936 | 0,547217  | 0,617340908 | 0,14008651 | FALSE |
| Rv0777  | 826  | 167  | 2,306293679 | 0,307131897  | 3,2439158 | 0,001179  | 0,00254094  | 0,00057659 | FALSE |
| Rv0779c | 15   | 1    | 3,906890596 | 1,907728814  | 2,0571599 | 0,0396708 | 0,062634838 | 0,01421305 | FALSE |
| Rv0780  | 191  | 60   | 1,670538232 | -0,328623549 | -1,863156 | 0,0624403 | 0,093743658 | 0,02127224 | FALSE |
| Rv0782  | 113  | 27   | 2,06529146  | 0,066129678  | 0,2693075 | 0,7876931 | 0,828885144 | 0,18808996 | FALSE |
| Rv0784  | 72   | 10   | 2,847996907 | 0,848835125  | 2,4092996 | 0,0159832 | 0,027479352 | 0,00623559 | FALSE |
| Rv0785  | 189  | 45   | 2,070389328 | 0,071227546  | 0,3748152 | 0,7077979 | 0,761263924 | 0,17274541 | FALSE |
| Rv0786c | 45   | 5    | 3,169925001 | 1,17076322   | 2,4845405 | 0,0129719 | 0,022809219 | 0,00517585 | FALSE |
| Rv0787  | 24   | 4    | 2,584962501 | 0,585800719  | 1,0047263 | 0,3150286 | 0,385861172 | 0,08753213 | FALSE |
| Rv0787A | 412  | 108  | 1,931613025 | -0,067548757 | -0,537623 | 0,5908372 | 0,657337659 | 0,14916254 | FALSE |
| Rv0790c | 24   | 3    | 3           | 1,000838218  | 1,5974481 | 0,1101659 | 0,155537553 | 0,03527552 | FALSE |
| Rv0791c | 70   | 10   | 2,807354922 | 0,80819314   | 2,2778437 | 0,0227359 | 0,037811666 | 0,00857838 | FALSE |
| Rv0793  | 4    | 0    | NA          | NA           | NA        | NA        | NA          | NA         | FALSE |
| Rv0795  | 47   | 11   | 2,095157233 | 0,095995451  | 0,2508168 | 0,8019558 | 0,840529769 | 0,19073235 | FALSE |
| Rv0796  | 24   | 3    | 3           | 1,000838218  | 1,5974481 | 0,1101659 | 0,155537553 | 0,03527552 | FALSE |
| Rv0797  | 28   | 10   | 1,485426827 | -0,513734955 | -1,151491 | 0,2495304 | 0,316598994 | 0,07183084 | FALSE |
| Rv0800  | 123  | 46   | 1,418952549 | -0,580209233 | -2,757381 | 0,0058266 | 0,011123069 | 0,00252404 | FALSE |
| Rv0801  | 87   | 24   | 1,857980995 | -0,141180787 | -0,522934 | 0,6010199 | 0,667536552 | 0,15147687 | FALSE |
| Rv0806c | 101  | 17   | 2,570748642 | 0,57158686   | 2,0161034 | 0,0437892 | 0,068547121 | 0,01555157 | FALSE |
| Rv0811c | 346  | 82   | 2,077076223 | 0,077914441  | 0,5541281 | 0,5794912 | 0,647270779 | 0,14687817 | FALSE |
| Rv0812  | 238  | 57   | 2,061927749 | 0,062765967  | 0,371188  | 0,7104975 | 0,763126951 | 0,17316816 | FALSE |
| Rv0813c | 252  | 77   | 1,710493383 | -0,288668399 | -1,866958 | 0,0619075 | 0,093049943 | 0,02111482 | FALSE |
| Rv0814c | 162  | 51   | 1,667424661 | -0,331737121 | -1,733068 | 0,0830835 | 0,12069293  | 0,02738742 | FALSE |
| Rv0815c | 260  | 74   | 1,812914447 | -0,186247334 | -1,201998 | 0,2293644 | 0,294470447 | 0,066821   | FALSE |
| Rv0816c | 34   | 11   | 1,628031223 | -0,371130559 | -0,894287 | 0,3711682 | 0,442730163 | 0,10044879 | FALSE |
| Rv0817c | 84   | 15   | 2,485426827 | 0,486265045  | 1,5874578 | 0,112409  | 0,158110228 | 0,03587825 | FALSE |
| Rv0818  | 839  | 219  | 1,937739941 | -0,061421841 | -0,696962 | 0,4858265 | 0,55846681  | 0,12672685 | FALSE |
| Rv0819  | 209  | 49   | 2,092649288 | 0,093487506  | 0,5153379 | 0,6063169 | 0,672094961 | 0,15251126 | FALSE |
| Rv0821c | 980  | 255  | 1,942284502 | -0,05687728  | -0,697    | 0,4858025 | 0,558602073 | 0,12672685 | FALSE |
| Rv0823c | 1041 | 257  | 2,018129804 | 0,018968022  | 0,2364422 | 0,8130895 | 0,85039118  | 0,19297009 | FALSE |
| Rv0824c | 3855 | 1052 | 1,873596156 | -0,125565626 | -3,091097 | 0,0019942 | 0,004141689 | 0,00093983 | FALSE |
| Rv0825c | 142  | 35   | 2,020464103 | 0,021302321  | 0,0980079 | 0,921926  | 0,939554545 | 0,21319084 | FALSE |

|         |      |      |             |              |           |           |             |            |       |
|---------|------|------|-------------|--------------|-----------|-----------|-------------|------------|-------|
| Rv0826  | 62   | 13   | 2,253756592 | 0,25459481   | 0,7433067 | 0,457296  | 0,531088205 | 0,12051412 | FALSE |
| Rv0827c | 168  | 32   | 2,392317423 | 0,393155641  | 1,8446981 | 0,0650815 | 0,097283053 | 0,02204745 | FALSE |
| Rv0828c | 13   | 0    | 4,700439718 | 2,701277936  | 2,3633382 | 0,0181111 | 0,030782293 | 0,00698058 | FALSE |
| Rv0829  | 40   | 11   | 1,862496476 | -0,136665306 | -0,342969 | 0,7316221 | 0,78050246  | 0,177111   | FALSE |
| Rv0830  | 58   | 9    | 2,688055994 | 0,688894212  | 1,8042782 | 0,0711877 | 0,105056805 | 0,02383495 | FALSE |
| Rv0832  | 47   | 8    | 2,554588852 | 0,55542707   | 1,3401595 | 0,1801935 | 0,238324342 | 0,05406224 | FALSE |
| Rv0833  | 149  | 43   | 1,792903766 | -0,206258016 | -1,011165 | 0,3119373 | 0,382549992 | 0,08680794 | FALSE |
| Rv0834c | 334  | 72   | 2,213779291 | 0,214617509  | 1,4645402 | 0,1430464 | 0,194946446 | 0,04423709 | FALSE |
| Rv0835  | 91   | 17   | 2,420331799 | 0,421170017  | 1,4473297 | 0,1478046 | 0,201014246 | 0,04561399 | FALSE |
| Rv0836c | 3    | 0 NA | NA          | NA           | NA        | NA        | NA          | NA         | FALSE |
| Rv0837c | 21   | 2    | 3,392317423 | 1,393155641  | 1,9433061 | 0,0519792 | 0,08000231  | 0,01813637 | FALSE |
| Rv0841  | 1    | 0 NA | NA          | NA           | NA        | NA        | NA          | NA         | FALSE |
| Rv0843  | 33   | 8    | 2,044394119 | 0,045232337  | 0,0999037 | 0,9204208 | 0,938505548 | 0,21296494 | FALSE |
| Rv0844c | 129  | 31   | 2,057030945 | 0,057869163  | 0,2521613 | 0,8009164 | 0,839886768 | 0,19058644 | FALSE |
| Rv0846c | 119  | 32   | 1,894817763 | -0,104344019 | -0,449143 | 0,6533283 | 0,713972562 | 0,16201409 | FALSE |
| Rv0848  | 203  | 33   | 2,620941798 | 0,621780016  | 3,0823883 | 0,0020535 | 0,004249148 | 0,00096421 | FALSE |
| Rv0851c | 69   | 19   | 1,860596943 | -0,138564839 | -0,456868 | 0,6477662 | 0,708777873 | 0,16081301 | FALSE |
| Rv0852  | 25   | 1    | 4,64385619  | 2,644694408  | 3,240331  | 0,0011939 | 0,0025717   | 0,00058357 | FALSE |
| Rv0853c | 145  | 53   | 1,451988635 | -0,547173146 | -2,807277 | 0,0049962 | 0,009654632 | 0,00219003 | FALSE |
| Rv0854  | 203  | 32   | 2,665335917 | 0,666174135  | 3,2771555 | 0,0010486 | 0,002279836 | 0,00051722 | FALSE |
| Rv0855  | 221  | 64   | 1,787902559 | -0,211259222 | -1,262456 | 0,2067849 | 0,269161596 | 0,06107794 | FALSE |
| Rv0856  | 135  | 52   | 1,376375879 | -0,622785903 | -3,123717 | 0,0017858 | 0,003736492 | 0,00084788 | FALSE |
| Rv0858c | 65   | 15   | 2,115477217 | 0,116315436  | 0,3561426 | 0,7217338 | 0,772041761 | 0,17519111 | FALSE |
| Rv0859  | 675  | 209  | 1,69138456  | -0,307777222 | -3,269042 | 0,0010791 | 0,002339776 | 0,00053094 | FALSE |
| Rv0861c | 784  | 166  | 2,239670413 | 0,240508631  | 2,5035402 | 0,0122958 | 0,021765944 | 0,00493911 | FALSE |
| Rv0865  | 179  | 32   | 2,483815777 | 0,484653995  | 2,3103571 | 0,0208684 | 0,034889762 | 0,00791716 | FALSE |
| Rv0868c | 73   | 14   | 2,382469637 | 0,383307855  | 1,187534  | 0,235017  | 0,300748608 | 0,0682235  | FALSE |
| Rv0870c | 299  | 87   | 1,781058178 | -0,218103604 | -1,517848 | 0,1290526 | 0,17834039  | 0,04046886 | FALSE |
| Rv0871  | 355  | 69   | 2,363150758 | 0,363988976  | 2,4953092 | 0,0125847 | 0,022217648 | 0,0050378  | FALSE |
| Rv0873  | 1061 | 287  | 1,886302014 | -0,112859768 | -1,453129 | 0,146188  | 0,198952845 | 0,04514622 | FALSE |
| Rv0874c | 128  | 21   | 2,607682577 | 0,608520795  | 2,4008959 | 0,016355  | 0,027984413 | 0,0063502  | FALSE |
| Rv0875c | 46   | 14   | 1,716207034 | -0,282954748 | -0,781038 | 0,4347799 | 0,508683419 | 0,11543004 | FALSE |
| Rv0876c | 617  | 129  | 2,257899424 | 0,258737642  | 2,3816422 | 0,0172356 | 0,02937655  | 0,0066661  | FALSE |
| Rv0878c | 90   | 19   | 2,243925583 | 0,244763801  | 0,8624505 | 0,3884397 | 0,46020006  | 0,10442823 | FALSE |
| Rv0879c | 21   | 2    | 3,392317423 | 1,393155641  | 1,9433061 | 0,0519792 | 0,08000231  | 0,01813637 | FALSE |
| Rv0881  | 101  | 26   | 1,957771765 | -0,041390017 | -0,162353 | 0,8710281 | 0,896486076 | 0,20342991 | FALSE |
| Rv0882  | 16   | 3    | 2,415037499 | 0,415875717  | 0,5997955 | 0,5486425 | 0,618772104 | 0,14041128 | FALSE |

|         |      |     |             |              |           |           |             |            |       |
|---------|------|-----|-------------|--------------|-----------|-----------|-------------|------------|-------|
| Rv0884c | 276  | 52  | 2,408084739 | 0,408922957  | 2,4526026 | 0,0141827 | 0,024706951 | 0,00560648 | FALSE |
| Rv0885  | 547  | 111 | 2,300981156 | 0,301819375  | 2,5963542 | 0,0094219 | 0,017156012 | 0,00389303 | FALSE |
| Rv0886  | 91   | 38  | 1,259867127 | -0,739294655 | -3,106463 | 0,0018934 | 0,003942754 | 0,00089469 | FALSE |
| Rv0887c | 8    | 0   | 4           | 2,000838218  | 1,5504405 | 0,1210358 | 0,168501698 | 0,03819582 | FALSE |
| Rv0888  | 240  | 56  | 2,099535674 | 0,100373892  | 0,592212  | 0,5537086 | 0,623416177 | 0,14146511 | FALSE |
| Rv0889c | 246  | 52  | 2,242074787 | 0,242913005  | 1,4156024 | 0,1568919 | 0,211766542 | 0,0480539  | FALSE |
| Rv0890c | 269  | 78  | 1,786060144 | -0,213101638 | -1,40544  | 0,1598904 | 0,215518746 | 0,04890534 | FALSE |
| Rv0893c | 52   | 17  | 1,612976877 | -0,386184905 | -1,153834 | 0,2485681 | 0,315631912 | 0,07162294 | FALSE |
| Rv0895  | 26   | 6   | 2,115477217 | 0,116315436  | 0,2252419 | 0,8217911 | 0,856539104 | 0,19436518 | FALSE |
| Rv0897c | 152  | 35  | 2,118644496 | 0,119482715  | 0,5591507 | 0,5760589 | 0,643984202 | 0,14613239 | FALSE |
| Rv0898c | 125  | 18  | 2,795859283 | 0,796697501  | 3,0066202 | 0,0026417 | 0,005365009 | 0,00121742 | FALSE |
| Rv0899  | 87   | 16  | 2,442943496 | 0,443781714  | 1,4853068 | 0,1374626 | 0,188051468 | 0,04267249 | FALSE |
| Rv0900  | 54   | 16  | 1,754887502 | -0,24427428  | -0,725673 | 0,4680391 | 0,541253794 | 0,12280288 | FALSE |
| Rv0904c | 28   | 3   | 3,222392421 | 1,223230639  | 2,0291217 | 0,0424459 | 0,066735748 | 0,01513457 | FALSE |
| Rv0905  | 324  | 77  | 2,073063462 | 0,07390168   | 0,5089562 | 0,610783  | 0,676095415 | 0,15341904 | FALSE |
| Rv0906  | 268  | 63  | 2,088809267 | 0,089647485  | 0,559973  | 0,5754979 | 0,643721951 | 0,14607288 | FALSE |
| Rv0907  | 279  | 48  | 2,539158811 | 0,539997029  | 3,1831661 | 0,0014567 | 0,003095573 | 0,00070245 | FALSE |
| Rv0909  | 139  | 29  | 2,260960078 | 0,261798296  | 1,1430455 | 0,2530197 | 0,319637955 | 0,07253199 | FALSE |
| Rv0910  | 268  | 58  | 2,208108195 | 0,208946413  | 1,278452  | 0,2010901 | 0,262355064 | 0,0595334  | FALSE |
| Rv0911  | 165  | 31  | 2,412125904 | 0,412964122  | 1,9136797 | 0,0556611 | 0,084792341 | 0,01924101 | FALSE |
| Rv0912  | 84   | 12  | 2,807354922 | 0,80819314   | 2,4952603 | 0,0125865 | 0,022205797 | 0,0050378  | FALSE |
| Rv0915c | 29   | 8   | 1,857980995 | -0,141180787 | -0,301911 | 0,7627199 | 0,807995469 | 0,18330046 | FALSE |
| Rv0916c | 6    | 6   | 0           | -1,999161782 | -2,683198 | 0,0072922 | 0,01363374  | 0,00309245 | FALSE |
| Rv0918  | 20   | 3   | 2,736965594 | 0,737803812  | 1,1251444 | 0,2605278 | 0,327601404 | 0,0743272  | FALSE |
| Rv0921  | 302  | 63  | 2,261124816 | 0,261963034  | 1,6859279 | 0,0918097 | 0,131719671 | 0,02988972 | FALSE |
| Rv0922  | 469  | 118 | 1,990801063 | -0,008360719 | -0,070274 | 0,9439757 | 0,95683375  | 0,2171151  | FALSE |
| Rv0924c | 154  | 30  | 2,359895945 | 0,360734163  | 1,6296427 | 0,103177  | 0,146694388 | 0,03328777 | FALSE |
| Rv0926c | 151  | 22  | 2,778973121 | 0,779811339  | 3,2440048 | 0,0011786 | 0,002541535 | 0,00057659 | FALSE |
| Rv0927c | 35   | 4   | 3,129283017 | 1,130121235  | 2,1300394 | 0,0331684 | 0,053198872 | 0,0120674  | FALSE |
| Rv0929  | 135  | 26  | 2,376375879 | 0,377214097  | 1,5909522 | 0,1116203 | 0,157281379 | 0,03569017 | FALSE |
| Rv0931c | 3501 | 818 | 2,097594313 | 0,098432532  | 2,2208859 | 0,0263587 | 0,043316113 | 0,00982926 | FALSE |
| Rv0934  | 602  | 128 | 2,233619677 | 0,234457895  | 2,1407381 | 0,0322952 | 0,051967416 | 0,0117924  | FALSE |
| Rv0938  | 819  | 213 | 1,943010021 | -0,05615176  | -0,628943 | 0,5293863 | 0,599282322 | 0,13598867 | FALSE |
| Rv0940c | 131  | 25  | 2,389566812 | 0,39040503   | 1,6183042 | 0,1055971 | 0,149703367 | 0,03397057 | FALSE |
| Rv0942  | NA   | NA  | NA          | NA           | NA        | NA        | NA          | NA         | FALSE |
| Rv0944  | 69   | 9   | 2,938599455 | 0,939437673  | 2,5696545 | 0,01018   | 0,018341671 | 0,00416208 | FALSE |
| Rv0945  | 138  | 32  | 2,108524457 | 0,109362675  | 0,4885068 | 0,6251909 | 0,688950232 | 0,15633604 | FALSE |

|         |      |     |             |              |           |           |             |            |       |
|---------|------|-----|-------------|--------------|-----------|-----------|-------------|------------|-------|
| Rv0946c | 240  | 57  | 2,074000581 | 0,0748388    | 0,4435118 | 0,6573956 | 0,718019409 | 0,1629324  | FALSE |
| Rv0949  | 469  | 94  | 2,318855261 | 0,319693479  | 2,5385697 | 0,0111307 | 0,019918028 | 0,00451978 | FALSE |
| Rv0953c | 33   | 14  | 1,237039197 | -0,762122585 | -1,936058 | 0,0528606 | 0,081011182 | 0,01837942 | FALSE |
| Rv0956  | 129  | 25  | 2,367371066 | 0,368209284  | 1,520439  | 0,1284007 | 0,177563922 | 0,04029266 | FALSE |
| Rv0957  | 263  | 63  | 2,061639066 | 0,062477284  | 0,388424  | 0,6977023 | 0,752252016 | 0,17070043 | FALSE |
| Rv0959A | 97   | 33  | 1,555518723 | -0,443643059 | -1,828508 | 0,0674733 | 0,100382809 | 0,02277879 | FALSE |
| Rv0961  | 511  | 105 | 2,282933963 | 0,283772181  | 2,3667802 | 0,0179436 | 0,030543591 | 0,00693093 | FALSE |
| Rv0962c | 9    | 0   | 4,169925001 | 2,17076322   | 1,7323823 | 0,0832055 | 0,12075899  | 0,02738742 | FALSE |
| Rv0963c | 17   | 2   | 3,087462841 | 1,088301059  | 1,4399515 | 0,1498811 | 0,203452465 | 0,04614579 | FALSE |
| Rv0964c | 14   | 1   | 3,807354922 | 1,80819314   | 1,9164848 | 0,0553034 | 0,084394139 | 0,01914695 | FALSE |
| Rv0965c | 118  | 28  | 2,075288127 | 0,076126345  | 0,3162547 | 0,7518092 | 0,798797264 | 0,18126244 | FALSE |
| Rv0967  | 544  | 104 | 2,387023123 | 0,387861341  | 3,278096  | 0,0010451 | 0,002273507 | 0,0005159  | FALSE |
| Rv0974c | 60   | 21  | 1,514573173 | -0,484588609 | -1,581985 | 0,113653  | 0,159632293 | 0,03622363 | FALSE |
| Rv0975c | 59   | 11  | 2,423211431 | 0,424049649  | 1,1727674 | 0,2408891 | 0,307564459 | 0,06979228 | FALSE |
| Rv0976c | 69   | 22  | 1,649092838 | -0,350068944 | -1,197316 | 0,2311833 | 0,296612525 | 0,06730708 | FALSE |
| Rv0977  | 95   | 32  | 1,569855608 | -0,429306174 | -1,746735 | 0,0806834 | 0,117596162 | 0,02668483 | FALSE |
| Rv0978c | 5    | 0   | 3,321928095 | 1,322766313  | 0,911373  | 0,3620989 | 0,433814702 | 0,09832204 | FALSE |
| Rv0979A | 171  | 41  | 2,06030051  | 0,061138728  | 0,3065561 | 0,7591813 | 0,804895415 | 0,18264623 | FALSE |
| Rv0979c | 3    | 1   | 1,584962501 | -0,414199281 | -0,298688 | 0,7651781 | 0,809729704 | 0,18369394 | FALSE |
| Rv0980c | 10   | 0   | 4,321928095 | 2,322766313  | 1,903164  | 0,0570192 | 0,086593586 | 0,01963463 | FALSE |
| Rv0982  | 939  | 274 | 1,776949265 | -0,222212517 | -2,743008 | 0,0060879 | 0,0115938   | 0,00263086 | FALSE |
| Rv0984  | 1250 | 361 | 1,791857353 | -0,207304429 | -2,945158 | 0,0032279 | 0,006475502 | 0,00146942 | FALSE |
| Rv0986  | 44   | 4   | 3,459431619 | 1,460269837  | 2,9143535 | 0,0035643 | 0,00707827  | 0,0016062  | FALSE |
| Rv0988  | 284  | 53  | 2,421826665 | 0,422664883  | 2,5653878 | 0,0103061 | 0,018543375 | 0,00420785 | FALSE |
| Rv0992c | 111  | 33  | 1,750021747 | -0,249140035 | -1,062051 | 0,2882124 | 0,357399659 | 0,0810881  | FALSE |
| Rv0993  | 667  | 205 | 1,702062852 | -0,29709893  | -3,131058 | 0,0017418 | 0,003654025 | 0,00082917 | FALSE |
| Rv0997  | 191  | 64  | 1,577428828 | -0,421732954 | -2,429943 | 0,0151012 | 0,026191321 | 0,00594331 | FALSE |
| Rv0998  | 211  | 62  | 1,766902878 | -0,232258904 | -1,361122 | 0,1734751 | 0,231848733 | 0,05258096 | FALSE |
| Rv0999  | 97   | 29  | 1,741931847 | -0,257229935 | -1,02649  | 0,3046606 | 0,375201008 | 0,08510132 | FALSE |
| Rv1000c | 60   | 11  | 2,447458977 | 0,448297195  | 1,2450479 | 0,2131141 | 0,276578545 | 0,06276098 | FALSE |
| Rv1002c | 287  | 53  | 2,436986472 | 0,43782469   | 2,6643923 | 0,0077128 | 0,014314877 | 0,00324832 | FALSE |
| Rv1003  | 105  | 29  | 1,856264523 | -0,142897259 | -0,581651 | 0,5608021 | 0,629784568 | 0,14291022 | FALSE |
| Rv1004c | 96   | 16  | 2,584962501 | 0,585800719  | 2,0094867 | 0,0444855 | 0,069540624 | 0,0157801  | FALSE |
| Rv1005c | 161  | 38  | 2,082989365 | 0,083827583  | 0,4062436 | 0,6845636 | 0,740109378 | 0,16794503 | FALSE |
| Rv1008  | 25   | 10  | 1,321928095 | -0,677233687 | -1,475554 | 0,1400636 | 0,191178745 | 0,04337462 | FALSE |
| Rv1009  | 411  | 116 | 1,825013589 | -0,174148193 | -1,410185 | 0,158485  | 0,213770457 | 0,04850862 | FALSE |
| Rv1012  | 12   | 3   | 2           | 0,000838218  | 0,001125  | 0,9991024 | 1           | 0,22680161 | FALSE |

|         |      |     |             |              |           |           |             |            |       |
|---------|------|-----|-------------|--------------|-----------|-----------|-------------|------------|-------|
| Rv1019  | 345  | 68  | 2,34298971  | 0,343827929  | 2,3317881 | 0,0197118 | 0,033252138 | 0,00754555 | FALSE |
| Rv1020  | 737  | 174 | 2,082577313 | 0,083415531  | 0,865104  | 0,3869817 | 0,459024341 | 0,10416144 | FALSE |
| Rv1021  | 234  | 59  | 1,98772167  | -0,011440112 | -0,067952 | 0,9458236 | 0,958214297 | 0,21743723 | FALSE |
| Rv1023  | 391  | 102 | 1,938599455 | -0,060562327 | -0,469002 | 0,6390685 | 0,700718942 | 0,15900659 | FALSE |
| Rv1024  | 94   | 33  | 1,510194732 | -0,48896705  | -1,999547 | 0,0455492 | 0,071118801 | 0,01613822 | FALSE |
| Rv1025  | 87   | 12  | 2,857980995 | 0,858819213  | 2,674931  | 0,0074745 | 0,013918453 | 0,00315836 | FALSE |
| Rv1026  | 119  | 30  | 1,987927168 | -0,011234614 | -0,047585 | 0,9620472 | 0,972651654 | 0,22071334 | FALSE |
| Rv1028A | 1    | 0   | NA          | NA           | NA        | NA        | NA          | NA         | FALSE |
| Rv1028c | 164  | 26  | 2,657112286 | 0,657950505  | 2,9133421 | 0,0035758 | 0,007097665 | 0,0016106  | FALSE |
| Rv1029  | 97   | 18  | 2,429987841 | 0,430826059  | 1,5259879 | 0,1270129 | 0,175953198 | 0,03992716 | FALSE |
| Rv1030  | 79   | 17  | 2,216317907 | 0,217156125  | 0,720324  | 0,4713255 | 0,544336142 | 0,12348682 | FALSE |
| Rv1031  | 37   | 7   | 2,402098444 | 0,402936662  | 0,8857137 | 0,3757718 | 0,447612206 | 0,10157181 | FALSE |
| Rv1034c | 1    | 1   | 0           | -1,999161782 | -1,095408 | 0,273338  | 0,341207532 | 0,07737244 | FALSE |
| Rv1035c | 4    | 3   | 0,415037499 | -1,584124283 | -1,615523 | 0,1061976 | 0,150365522 | 0,0341147  | FALSE |
| Rv1037c | 100  | 17  | 2,556393349 | 0,557231567  | 1,9605859 | 0,0499273 | 0,077342284 | 0,01755045 | FALSE |
| Rv1038c | 101  | 22  | 2,198779864 | 0,199618082  | 0,7509747 | 0,4526679 | 0,526410769 | 0,11943511 | FALSE |
| Rv1039c | 10   | 0   | 4,321928095 | 2,322766313  | 1,903164  | 0,0570192 | 0,086593586 | 0,01963463 | FALSE |
| Rv1040c | 8    | 0   | 4           | 2,000838218  | 1,5504405 | 0,1210358 | 0,168501698 | 0,03819582 | FALSE |
| Rv1044  | 33   | 2   | 4,044394119 | 2,045232337  | 3,194172  | 0,0014023 | 0,002987185 | 0,00067767 | FALSE |
| Rv1047  | 17   | 2   | 3,087462841 | 1,088301059  | 1,4399515 | 0,1498811 | 0,203452465 | 0,04614579 | FALSE |
| Rv1048c | 67   | 11  | 2,606657572 | 0,60749579   | 1,7343812 | 0,0828505 | 0,120398762 | 0,02732079 | FALSE |
| Rv1049  | 43   | 5   | 3,10433666  | 1,105174878  | 2,318846  | 0,0204034 | 0,034264831 | 0,00777339 | FALSE |
| Rv1050  | 27   | 3   | 3,169925001 | 1,17076322   | 1,9245101 | 0,0542907 | 0,082944958 | 0,01881816 | FALSE |
| Rv1051c | 1    | 0   | NA          | NA           | NA        | NA        | NA          | NA         | FALSE |
| Rv1053c | NA   | NA  | NA          | NA           | NA        | NA        | NA          | NA         | FALSE |
| Rv1054  | 45   | 15  | 1,584962501 | -0,414199281 | -1,15683  | 0,247342  | 0,314581337 | 0,07136154 | FALSE |
| Rv1058  | 288  | 69  | 2,061400545 | 0,062238763  | 0,404934  | 0,685526  | 0,740946749 | 0,16813505 | FALSE |
| Rv1062  | 46   | 20  | 1,201633861 | -0,797527921 | -2,406734 | 0,0160959 | 0,027612968 | 0,00626591 | FALSE |
| Rv1064c | 19   | 7   | 1,440572591 | -0,55858919  | -1,039408 | 0,2986151 | 0,368907793 | 0,08369916 | FALSE |
| Rv1067c | 9    | 4   | 1,169925001 | -0,82923678  | -1,11297  | 0,2657215 | 0,33275298  | 0,0754721  | FALSE |
| Rv1068c | 13   | 2   | 2,700439718 | 0,701277936  | 0,8676856 | 0,3855664 | 0,457551996 | 0,10381172 | FALSE |
| Rv1073  | 1109 | 274 | 2,017011567 | 0,017849785  | 0,2297043 | 0,8183216 | 0,854051424 | 0,19380067 | FALSE |
| Rv1075c | 24   | 7   | 1,777607579 | -0,221554203 | -0,437057 | 0,6620699 | 0,722124953 | 0,16381872 | FALSE |
| Rv1076  | 265  | 47  | 2,495259698 | 0,496097916  | 2,871831  | 0,004081  | 0,007987847 | 0,0018126  | FALSE |
| Rv1079  | 704  | 175 | 2,008220507 | 0,009058725  | 0,0930112 | 0,9258947 | 0,941895436 | 0,21373417 | FALSE |
| Rv1082  | 284  | 54  | 2,394859617 | 0,395697835  | 2,412961  | 0,0158235 | 0,027264281 | 0,00618679 | FALSE |
| Rv1083  | 58   | 11  | 2,398549376 | 0,399387595  | 1,0998506 | 0,2713972 | 0,339268049 | 0,07698644 | FALSE |

|         |     |      |             |              |           |           |             |            |       |
|---------|-----|------|-------------|--------------|-----------|-----------|-------------|------------|-------|
| Rv1084  | 100 | 34   | 1,556393349 | -0,442768433 | -1,85263  | 0,0639355 | 0,095769656 | 0,02173197 | FALSE |
| Rv1085c | 130 | 43   | 1,596103058 | -0,403058724 | -1,909711 | 0,0561705 | 0,085469251 | 0,01939461 | FALSE |
| Rv1086  | 318 | 68   | 2,225420114 | 0,226258332  | 1,5034985 | 0,1327105 | 0,182691241 | 0,04145615 | FALSE |
| Rv1087A | 5   | 1    | 2,321928095 | 0,322766313  | 0,2644593 | 0,791426  | 0,831371461 | 0,18857881 | FALSE |
| Rv1088  | 4   | 0 NA | NA          | NA           | NA        | NA        | NA          | NA         | FALSE |
| Rv1089  | NA  | NA   | NA          | NA           | NA        | NA        | NA          | NA         | FALSE |
| Rv1089A | 1   | 0 NA | NA          | NA           | NA        | NA        | NA          | NA         | FALSE |
| Rv1090  | 83  | 15   | 2,468148836 | 0,468987054  | 1,5264748 | 0,1268917 | 0,175847049 | 0,03990307 | FALSE |
| Rv1096  | 192 | 41   | 2,227410496 | 0,228248714  | 1,1780926 | 0,2387597 | 0,305043159 | 0,06920563 | FALSE |
| Rv1098c | 516 | 137  | 1,913195172 | -0,085966609 | -0,768186 | 0,4423766 | 0,516193264 | 0,11713417 | FALSE |
| Rv1099c | 393 | 84   | 2,226068079 | 0,226906298  | 1,6760523 | 0,0937279 | 0,13408161  | 0,03042569 | FALSE |
| Rv1100  | 190 | 34   | 2,482392767 | 0,483230985  | 2,3738902 | 0,0176018 | 0,029974712 | 0,00680184 | FALSE |
| Rv1104  | 123 | 25   | 2,298658316 | 0,299496534  | 1,2220658 | 0,2216828 | 0,286098433 | 0,06492123 | FALSE |
| Rv1108c | 528 | 157  | 1,74977337  | -0,249388411 | -2,319046 | 0,0203926 | 0,034268537 | 0,00777339 | FALSE |
| Rv1109c | 545 | 128  | 2,09011242  | 0,090950638  | 0,8100299 | 0,417923  | 0,490416025 | 0,11128482 | FALSE |
| Rv1111c | 332 | 60   | 2,468148836 | 0,468987054  | 3,0531357 | 0,0022646 | 0,004649516 | 0,00105506 | FALSE |
| Rv1115  | 47  | 4    | 3,554588852 | 1,55542707   | 3,1558777 | 0,0016002 | 0,003372176 | 0,00076501 | FALSE |
| Rv1116  | 13  | 0    | 4,700439718 | 2,701277936  | 2,3633382 | 0,0181111 | 0,030782293 | 0,00698058 | FALSE |
| Rv1116A | 51  | 12   | 2,087462841 | 0,088301059  | 0,240651  | 0,8098257 | 0,847202226 | 0,19224646 | FALSE |
| Rv1118c | 34  | 8    | 2,087462841 | 0,088301059  | 0,1964897 | 0,8442269 | 0,875067208 | 0,19856956 | FALSE |
| Rv1119c | 3   | 0 NA | NA          | NA           | NA        | NA        | NA          | NA         | FALSE |
| Rv1120c | 2   | 0 NA | NA          | NA           | NA        | NA        | NA          | NA         | FALSE |
| Rv1121  | 502 | 150  | 1,742724863 | -0,256436918 | -2,32796  | 0,0199142 | 0,033550478 | 0,00761325 | FALSE |
| Rv1124  | 99  | 30   | 1,722466024 | -0,276695757 | -1,119265 | 0,2630272 | 0,330112692 | 0,07489699 | FALSE |
| Rv1125  | 75  | 12   | 2,64385619  | 0,644694408  | 1,9348605 | 0,0530074 | 0,081173073 | 0,01841615 | FALSE |
| Rv1126c | 233 | 38   | 2,616258631 | 0,617096849  | 3,2801172 | 0,0010376 | 0,002261022 | 0,00051307 | FALSE |
| Rv1134  | 12  | 6    | 1           | -0,999161782 | -1,594772 | 0,1107632 | 0,156241026 | 0,03545409 | FALSE |
| Rv1135A | 5   | 0    | 3,321928095 | 1,322766313  | 0,911373  | 0,3620989 | 0,433814702 | 0,09832204 | FALSE |
| Rv1136  | 2   | 1    | 1           | -0,999161782 | -0,65106  | 0,5150075 | 0,58645576  | 0,13305887 | FALSE |
| Rv1139c | 96  | 23   | 2,061400545 | 0,062238763  | 0,2337761 | 0,8151588 | 0,852103458 | 0,19335864 | FALSE |
| Rv1140  | 177 | 46   | 1,944043594 | -0,055118188 | -0,286898 | 0,7741902 | 0,817511719 | 0,18550911 | FALSE |
| Rv1142c | 355 | 76   | 2,223747701 | 0,224585919  | 1,5772906 | 0,1147287 | 0,160799533 | 0,0364885  | FALSE |
| Rv1143  | 145 | 27   | 2,425021588 | 0,425859806  | 1,845835  | 0,0649162 | 0,097091158 | 0,02203185 | FALSE |
| Rv1144  | 77  | 13   | 2,566346823 | 0,567185041  | 1,7481103 | 0,0804449 | 0,117291985 | 0,0266158  | FALSE |
| Rv1146  | 118 | 20   | 2,560714954 | 0,561553173  | 2,144661  | 0,03198   | 0,051628717 | 0,01171555 | FALSE |
| Rv1147  | 35  | 7    | 2,321928095 | 0,322766313  | 0,699699  | 0,4841153 | 0,556905559 | 0,12635414 | FALSE |
| Rv1154c | 39  | 15   | 1,378511623 | -0,620650159 | -1,672513 | 0,0944232 | 0,134929383 | 0,03061807 | FALSE |



|         |      |     |             |              |           |           |             |            |       |
|---------|------|-----|-------------|--------------|-----------|-----------|-------------|------------|-------|
| Rv1155  | 187  | 51  | 1,874469118 | -0,124692664 | -0,675221 | 0,4995354 | 0,571891916 | 0,12977326 | FALSE |
| Rv1158c | 132  | 22  | 2,584962501 | 0,585800719  | 2,3563519 | 0,0184554 | 0,031320219 | 0,00710716 | FALSE |
| Rv1159  | 263  | 76  | 1,790991476 | -0,208170306 | -1,356357 | 0,1749855 | 0,233314027 | 0,05286234 | FALSE |
| Rv1160  | 63   | 15  | 2,070389328 | 0,071227546  | 0,216392  | 0,8286822 | 0,862013064 | 0,19558153 | FALSE |
| Rv1163  | 117  | 38  | 1,622437206 | -0,376724576 | -1,685624 | 0,0918683 | 0,131755858 | 0,02989794 | FALSE |
| Rv1165  | 401  | 83  | 2,272418995 | 0,273257213  | 2,0225558 | 0,043119  | 0,067672587 | 0,01535621 | FALSE |
| Rv1166  | 315  | 93  | 1,760049207 | -0,239112575 | -1,714238 | 0,0864849 | 0,125127158 | 0,02839376 | FALSE |
| Rv1167c | 185  | 48  | 1,94641896  | -0,052742822 | -0,280555 | 0,7790518 | 0,821325972 | 0,18635388 | FALSE |
| Rv1170  | 73   | 14  | 2,382469637 | 0,383307855  | 1,187534  | 0,235017  | 0,300748608 | 0,0682235  | FALSE |
| Rv1171  | 143  | 42  | 1,767553914 | -0,231607868 | -1,11724  | 0,2638915 | 0,330934246 | 0,07509106 | FALSE |
| Rv1178  | 952  | 253 | 1,911824189 | -0,087337593 | -1,060452 | 0,2889391 | 0,358131878 | 0,081267   | FALSE |
| Rv1183  | 96   | 25  | 1,941106311 | -0,058055471 | -0,222657 | 0,8238027 | 0,858182184 | 0,19473802 | FALSE |
| Rv1185c | 1438 | 374 | 1,942953501 | -0,056208281 | -0,83439  | 0,4040613 | 0,476275504 | 0,10806733 | FALSE |
| Rv1187  | 337  | 62  | 2,442408471 | 0,443246689  | 2,920214  | 0,0034979 | 0,006974602 | 0,00158121 | FALSE |
| Rv1188  | 55   | 15  | 1,874469118 | -0,124692664 | -0,366175 | 0,7142342 | 0,766201438 | 0,17384218 | FALSE |
| Rv1189  | 40   | 9   | 2,152003093 | 0,152841312  | 0,3647949 | 0,7152645 | 0,766785336 | 0,17399832 | FALSE |
| Rv1190  | 30   | 2   | 3,906890596 | 1,907728814  | 2,9092699 | 0,0036227 | 0,007181746 | 0,00162927 | FALSE |
| Rv1191  | 101  | 33  | 1,613817363 | -0,385344418 | -1,604353 | 0,1086362 | 0,153625427 | 0,03486056 | FALSE |
| Rv1192  | 479  | 132 | 1,859487726 | -0,139674056 | -1,213762 | 0,2248385 | 0,289413564 | 0,0656735  | FALSE |
| Rv1193  | 202  | 64  | 1,658211483 | -0,340950299 | -1,992186 | 0,0463506 | 0,072284223 | 0,01640268 | FALSE |
| Rv1195  | 562  | 175 | 1,683215208 | -0,315946573 | -3,066291 | 0,0021673 | 0,004468339 | 0,00101395 | FALSE |
| Rv1199c | 8    | 1   | 3           | 1,000838218  | 0,9222841 | 0,3563804 | 0,429901931 | 0,09741892 | FALSE |
| Rv1200  | 176  | 27  | 2,704544116 | 0,705382335  | 3,2091392 | 0,0013313 | 0,002847487 | 0,00064615 | FALSE |
| Rv1203c | 12   | 7   | 0,777607579 | -1,221554203 | -2,026341 | 0,0427299 | 0,067115345 | 0,01522976 | FALSE |
| Rv1207  | 222  | 71  | 1,644668747 | -0,354493035 | -2,176555 | 0,0295138 | 0,047921982 | 0,01087442 | FALSE |
| Rv1209  | 242  | 83  | 1,543823806 | -0,455337976 | -2,970437 | 0,0029738 | 0,006002321 | 0,00136204 | FALSE |
| Rv1210  | 135  | 31  | 2,122619287 | 0,123457505  | 0,5441081 | 0,5863671 | 0,652916962 | 0,1481594  | FALSE |
| Rv1211  | 1086 | 227 | 2,258259901 | 0,259098119  | 3,1643172 | 0,0015545 | 0,003297924 | 0,00074836 | FALSE |
| Rv1212c | 101  | 17  | 2,570748642 | 0,57158686   | 2,0161034 | 0,0437892 | 0,068547121 | 0,01555157 | FALSE |
| Rv1213  | 177  | 31  | 2,51340924  | 0,514247458  | 2,425225  | 0,0152989 | 0,026464412 | 0,00600528 | FALSE |
| Rv1217c | 115  | 29  | 1,987509056 | -0,011652726 | -0,048523 | 0,9612998 | 0,972145231 | 0,22059843 | FALSE |
| Rv1221  | 676  | 168 | 2,008562014 | 0,009400232  | 0,0945724 | 0,9246545 | 0,941605268 | 0,21357398 | FALSE |
| Rv1223  | 1505 | 359 | 2,067707738 | 0,068545956  | 1,0187112 | 0,3083401 | 0,378727267 | 0,08594049 | FALSE |
| Rv1224  | 262  | 45  | 2,541569905 | 0,542408123  | 3,0971299 | 0,001954  | 0,004060455 | 0,0009214  | FALSE |
| Rv1225c | 28   | 10  | 1,485426827 | -0,513734955 | -1,151491 | 0,2495304 | 0,316598994 | 0,07183084 | FALSE |
| Rv1226c | 125  | 47  | 1,411195433 | -0,587966349 | -2,820663 | 0,0047924 | 0,009283604 | 0,00210663 | FALSE |
| Rv1227c | 58   | 8   | 2,857980995 | 0,858819213  | 2,1840585 | 0,028958  | 0,047194282 | 0,01070532 | FALSE |

|         |      |     |             |              |           |           |             |            |       |
|---------|------|-----|-------------|--------------|-----------|-----------|-------------|------------|-------|
| Rv1228  | 44   | 10  | 2,137503524 | 0,138341742  | 0,3471757 | 0,7284593 | 0,778180843 | 0,17658418 | FALSE |
| Rv1229c | 559  | 134 | 2,060615282 | 0,061453501  | 0,5571496 | 0,5774252 | 0,645328691 | 0,14643748 | FALSE |
| Rv1236  | 140  | 26  | 2,428843299 | 0,429681517  | 1,8287938 | 0,0674305 | 0,100356954 | 0,02277292 | FALSE |
| Rv1237  | 103  | 23  | 2,162938571 | 0,163776789  | 0,6260852 | 0,5312591 | 0,601229787 | 0,13643059 | FALSE |
| Rv1244  | 152  | 37  | 2,038474148 | 0,039312366  | 0,1865464 | 0,8520163 | 0,881288289 | 0,19996573 | FALSE |
| Rv1249c | 269  | 82  | 1,713910358 | -0,285251424 | -1,904952 | 0,0567863 | 0,086339635 | 0,01959212 | FALSE |
| Rv1254  | 150  | 24  | 2,64385619  | 0,644694408  | 2,7363532 | 0,0062124 | 0,01181665  | 0,00268078 | FALSE |
| Rv1256c | 32   | 4   | 3           | 1,000838218  | 1,8445772 | 0,0650991 | 0,097217241 | 0,02204745 | FALSE |
| Rv1257c | 215  | 61  | 1,817455512 | -0,18170627  | -1,065536 | 0,2866333 | 0,355609231 | 0,08069457 | FALSE |
| Rv1258c | 63   | 9   | 2,807354922 | 0,80819314   | 2,1609489 | 0,0306993 | 0,049764889 | 0,01129261 | FALSE |
| Rv1259  | 102  | 21  | 2,280107919 | 0,280946137  | 1,0472904 | 0,2949657 | 0,364913591 | 0,08279636 | FALSE |
| Rv1260  | 524  | 139 | 1,914481929 | -0,084679853 | -0,762363 | 0,4458435 | 0,51962369  | 0,1179126  | FALSE |
| Rv1261c | 215  | 58  | 1,890211854 | -0,108949927 | -0,630883 | 0,5281168 | 0,598532322 | 0,13581848 | FALSE |
| Rv1262c | 76   | 19  | 2           | 0,000838218  | 0,0028313 | 0,997741  | 1           | 0,22680161 | FALSE |
| Rv1264  | 825  | 197 | 2,06619849  | 0,067036708  | 0,7376854 | 0,4607056 | 0,534261413 | 0,12123418 | FALSE |
| Rv1265  | 305  | 66  | 2,208271313 | 0,209109531  | 1,3648907 | 0,1722874 | 0,230495759 | 0,05230392 | FALSE |
| Rv1266c | 281  | 49  | 2,519716476 | 0,520554694  | 3,0899321 | 0,002002  | 0,004155777 | 0,00094303 | FALSE |
| Rv1268c | 6    | 0   | 3,584962501 | 1,585800719  | 1,1435548 | 0,2528083 | 0,319883217 | 0,07249462 | FALSE |
| Rv1269c | 37   | 12  | 1,624490865 | -0,374670917 | -0,942386 | 0,3459953 | 0,41936244  | 0,09516139 | FALSE |
| Rv1271c | 19   | 1   | 4,247927513 | 2,248765732  | 2,5725352 | 0,0100957 | 0,018214691 | 0,00413137 | FALSE |
| Rv1272c | 188  | 29  | 2,696607857 | 0,697446075  | 3,2839436 | 0,0010237 | 0,002233015 | 0,00050671 | FALSE |
| Rv1273c | 95   | 20  | 2,247927513 | 0,248765732  | 0,8999481 | 0,3681479 | 0,439592833 | 0,09975206 | FALSE |
| Rv1279  | 312  | 63  | 2,308122295 | 0,308960513  | 2,0046541 | 0,045     | 0,070317012 | 0,01595628 | FALSE |
| Rv1281c | 314  | 87  | 1,851677253 | -0,147484529 | -1,039029 | 0,2987913 | 0,368952021 | 0,0837223  | FALSE |
| Rv1282c | 129  | 42  | 1,618909833 | -0,380251949 | -1,787628 | 0,073836  | 0,108336733 | 0,02458369 | FALSE |
| Rv1283c | 220  | 78  | 1,495957495 | -0,503204287 | -3,155979 | 0,0015996 | 0,003373715 | 0,00076501 | FALSE |
| Rv1284  | 193  | 43  | 2,166192283 | 0,167030501  | 0,8735799 | 0,3823471 | 0,454620702 | 0,10316217 | FALSE |
| Rv1285  | 85   | 23  | 1,88582898  | -0,113332802 | -0,412934 | 0,6796547 | 0,736821941 | 0,16715256 | FALSE |
| Rv1286  | 176  | 34  | 2,371968777 | 0,372806996  | 1,7967139 | 0,0723811 | 0,106558746 | 0,0241712  | FALSE |
| Rv1288  | 55   | 8   | 2,781359714 | 0,782197932  | 1,9629657 | 0,0496502 | 0,076973366 | 0,01745987 | FALSE |
| Rv1289  | 261  | 47  | 2,473317145 | 0,474155363  | 2,7343908 | 0,0062496 | 0,011878724 | 0,00269551 | FALSE |
| Rv1290A | 21   | 2   | 3,392317423 | 1,393155641  | 1,9433061 | 0,0519792 | 0,08000231  | 0,01813637 | FALSE |
| Rv1291c | NA   | NA  | NA          | NA           | NA        | NA        | NA          | NA         | FALSE |
| Rv1300  | 805  | 236 | 1,770201924 | -0,228959858 | -2,619829 | 0,0087974 | 0,01613058  | 0,00366034 | FALSE |
| Rv1303  | 654  | 157 | 2,058526077 | 0,059364295  | 0,5823746 | 0,5603144 | 0,629595412 | 0,14282738 | FALSE |
| Rv1304  | 1271 | 280 | 2,182465298 | 0,183303516  | 2,4539943 | 0,0141279 | 0,024644193 | 0,00559224 | FALSE |
| Rv1306  | 881  | 239 | 1,882131401 | -0,117030381 | -1,373993 | 0,1694439 | 0,227153882 | 0,05154558 | FALSE |

|         |      |      |             |              |           |           |             |            |       |
|---------|------|------|-------------|--------------|-----------|-----------|-------------|------------|-------|
| Rv1307  | 1733 | 424  | 2,031135485 | 0,031973703  | 0,5131876 | 0,6078201 | 0,673382732 | 0,15280348 | FALSE |
| Rv1308  | 3068 | 746  | 2,040050947 | 0,040889165  | 0,872194  | 0,3831026 | 0,455381716 | 0,10333486 | FALSE |
| Rv1314c | 100  | 25   | 2           | 0,000838218  | 0,0032477 | 0,9974087 | 1           | 0,22680161 | FALSE |
| Rv1316c | 46   | 10   | 2,201633861 | 0,202472079  | 0,5137923 | 0,6073972 | 0,673103289 | 0,15274007 | FALSE |
| Rv1318c | 109  | 38   | 1,520256811 | -0,478904971 | -2,105211 | 0,035273  | 0,056368138 | 0,01279101 | FALSE |
| Rv1319c | 105  | 17   | 2,626782676 | 0,627620895  | 2,235348  | 0,0253945 | 0,041923799 | 0,00951332 | FALSE |
| Rv1322A | 1359 | 319  | 2,090917127 | 0,091755345  | 1,2905542 | 0,1968583 | 0,257686405 | 0,058474   | FALSE |
| Rv1323  | 1508 | 345  | 2,127968162 | 0,12880638   | 1,8962717 | 0,0579241 | 0,087866444 | 0,01993858 | FALSE |
| Rv1325c | 57   | 23   | 1,309328058 | -0,689833724 | -2,274478 | 0,0229373 | 0,038106368 | 0,00864707 | FALSE |
| Rv1327c | 688  | 204  | 1,753839413 | -0,245322369 | -2,602335 | 0,0092591 | 0,016875265 | 0,00382932 | FALSE |
| Rv1329c | 164  | 60   | 1,450661409 | -0,548500373 | -2,993492 | 0,002758  | 0,005584051 | 0,00126713 | FALSE |
| Rv1330c | 81   | 26   | 1,639410285 | -0,359751497 | -1,335384 | 0,1817506 | 0,240061693 | 0,05447461 | FALSE |
| Rv1333  | 503  | 125  | 2,008630305 | 0,009468523  | 0,082166  | 0,9345147 | 0,948706833 | 0,2152798  | FALSE |
| Rv1339  | 295  | 88   | 1,745139526 | -0,254022256 | -1,766916 | 0,0772423 | 0,112872814 | 0,02561301 | FALSE |
| Rv1341  | 204  | 44   | 2,212993723 | 0,213831941  | 1,1404982 | 0,2540788 | 0,320770413 | 0,07278897 | FALSE |
| Rv1343c | 43   | 6    | 2,841302254 | 0,842140472  | 1,8493585 | 0,0644061 | 0,096401333 | 0,02187531 | FALSE |
| Rv1344  | 120  | 26   | 2,206450877 | 0,207289096  | 0,8489003 | 0,3959368 | 0,467957618 | 0,10618857 | FALSE |
| Rv1345  | 196  | 68   | 1,527247003 | -0,471914779 | -2,778506 | 0,005461  | 0,010480776 | 0,00237829 | FALSE |
| Rv1346  | 222  | 47   | 2,239827015 | 0,240665233  | 1,3328437 | 0,1825831 | 0,240919272 | 0,05466921 | FALSE |
| Rv1347c | 28   | 7    | 2           | 0,000838218  | 0,0017185 | 0,9986288 | 1           | 0,22680161 | FALSE |
| Rv1348  | 134  | 35   | 1,936806174 | -0,062355608 | -0,282757 | 0,7773631 | 0,819983928 | 0,1860701  | FALSE |
| Rv1349  | 49   | 15   | 1,707819249 | -0,291342533 | -0,831209 | 0,4058557 | 0,477890675 | 0,10842639 | FALSE |
| Rv1351  | 64   | 15   | 2,093109404 | 0,093947623  | 0,2865425 | 0,7744627 | 0,817580518 | 0,18552472 | FALSE |
| Rv1353c | 18   | 0    | 5,169925001 | 3,17076322   | 3,0092122 | 0,0026193 | 0,005333178 | 0,00120895 | FALSE |
| Rv1355c | 128  | 20   | 2,678071905 | 0,678910123  | 2,6461384 | 0,0081416 | 0,015026049 | 0,0034097  | FALSE |
| Rv1356c | 48   | 5    | 3,263034406 | 1,263872624  | 2,72576   | 0,0064154 | 0,012141165 | 0,00275506 | FALSE |
| Rv1357c | 0    | 1 NA | NA          | NA           | NA        | NA        | NA          | NA         | FALSE |
| Rv1358  | 32   | 10   | 1,678071905 | -0,321089877 | -0,744126 | 0,4568005 | 0,530669013 | 0,12041899 | FALSE |
| Rv1359  | 26   | 2    | 3,700439718 | 1,701277936  | 2,5032576 | 0,0123056 | 0,021773562 | 0,00494029 | FALSE |
| Rv1360  | 283  | 74   | 1,935204877 | -0,063956905 | -0,421605 | 0,6733133 | 0,731555856 | 0,16599586 | FALSE |
| Rv1365c | 57   | 11   | 2,373458396 | 0,374296614  | 1,0262819 | 0,3047587 | 0,375087661 | 0,08510132 | FALSE |
| Rv1368  | 187  | 59   | 1,664251411 | -0,334910371 | -1,880858 | 0,0599913 | 0,090584112 | 0,02055528 | FALSE |
| Rv1369c | 8    | 1    | 3           | 1,000838218  | 0,9222841 | 0,3563804 | 0,429901931 | 0,09741892 | FALSE |
| Rv1370c | 16   | 5    | 1,678071905 | -0,321089877 | -0,526174 | 0,5987677 | 0,665503639 | 0,15099428 | FALSE |
| Rv1371  | 1    | 1    | 0           | -1,999161782 | -1,095408 | 0,273338  | 0,341207532 | 0,07737244 | FALSE |
| Rv1373  | 71   | 15   | 2,242856524 | 0,243694742  | 0,7628152 | 0,4455736 | 0,519462694 | 0,11787606 | FALSE |
| Rv1376  | 132  | 24   | 2,459431619 | 0,460269837  | 1,892128  | 0,0584739 | 0,088598225 | 0,02010464 | FALSE |

|         |      |     |             |              |           |           |             |            |       |
|---------|------|-----|-------------|--------------|-----------|-----------|-------------|------------|-------|
| Rv1379  | 700  | 207 | 1,757724154 | -0,241437628 | -2,581635 | 0,0098333 | 0,017814748 | 0,00404251 | FALSE |
| Rv1382  | 46   | 7   | 2,716207034 | 0,717045252  | 1,6643423 | 0,096044  | 0,137195843 | 0,03113237 | FALSE |
| Rv1383  | 80   | 28  | 1,514573173 | -0,484588609 | -1,826731 | 0,0677402 | 0,100590088 | 0,02282582 | FALSE |
| Rv1384  | 355  | 109 | 1,70349089  | -0,295670892 | -2,272475 | 0,0230578 | 0,038226193 | 0,00867426 | FALSE |
| Rv1385  | 21   | 13  | 0,691877705 | -1,307284077 | -2,911672 | 0,003595  | 0,00713214  | 0,00161842 | FALSE |
| Rv1388  | 1534 | 332 | 2,208043336 | 0,208881554  | 3,0587721 | 0,0022225 | 0,004574838 | 0,00103812 | FALSE |
| Rv1389  | 475  | 109 | 2,123599378 | 0,124437597  | 1,0286466 | 0,3036458 | 0,374126522 | 0,08489649 | FALSE |
| Rv1391  | 1296 | 351 | 1,884522783 | -0,114638999 | -1,63195  | 0,1026901 | 0,146054694 | 0,03314262 | FALSE |
| Rv1395  | 97   | 14  | 2,79255792  | 0,793396138  | 2,6390758 | 0,0083132 | 0,015314065 | 0,00347506 | FALSE |
| Rv1396c | 210  | 66  | 1,669851398 | -0,329310384 | -1,957958 | 0,050235  | 0,077727247 | 0,01763781 | FALSE |
| Rv1397c | 600  | 124 | 2,27462238  | 0,275460598  | 2,4931509 | 0,0126615 | 0,022313209 | 0,0050633  | FALSE |
| Rv1399c | 139  | 28  | 2,311586151 | 0,312424369  | 1,3521701 | 0,1763209 | 0,234065843 | 0,05311404 | FALSE |
| Rv1400c | 96   | 36  | 1,415037499 | -0,584124283 | -2,454093 | 0,014124  | 0,024648331 | 0,00559224 | FALSE |
| Rv1401  | 115  | 40  | 1,523561956 | -0,475599826 | -2,146227 | 0,0318548 | 0,051447786 | 0,01167449 | FALSE |
| Rv1403c | 17   | 1   | 4,087462841 | 2,088301059  | 2,3234536 | 0,0201548 | 0,033912342 | 0,00769208 | FALSE |
| Rv1406  | 40   | 8   | 2,321928095 | 0,322766313  | 0,7480107 | 0,4544537 | 0,528098252 | 0,11983564 | FALSE |
| Rv1407  | 130  | 29  | 2,164386818 | 0,165225036  | 0,7094212 | 0,4780631 | 0,550746593 | 0,12495673 | FALSE |
| Rv1409  | 482  | 127 | 1,924204649 | -0,074957132 | -0,646123 | 0,5181997 | 0,58915531  | 0,13369066 | FALSE |
| Rv1410c | 2114 | 593 | 1,833871367 | -0,165290415 | -3,032462 | 0,0024257 | 0,004962065 | 0,00112599 | FALSE |
| Rv1411c | 735  | 185 | 1,990218979 | -0,008942803 | -0,094115 | 0,9250179 | 0,941246287 | 0,21358686 | FALSE |
| Rv1413  | 34   | 10  | 1,765534746 | -0,233627036 | -0,549699 | 0,5825257 | 0,650291967 | 0,14756374 | FALSE |
| Rv1414  | 23   | 9   | 1,353636955 | -0,645524827 | -1,341642 | 0,179712  | 0,238046707 | 0,05399017 | FALSE |
| Rv1418  | 426  | 130 | 1,712341807 | -0,286819975 | -2,411205 | 0,0158999 | 0,02736006  | 0,00620852 | FALSE |
| Rv1419  | 634  | 146 | 2,118514471 | 0,119352689  | 1,1408971 | 0,2539128 | 0,320663443 | 0,07276469 | FALSE |
| Rv1420  | 579  | 149 | 1,958251018 | -0,040910764 | -0,384242 | 0,7007991 | 0,754765556 | 0,1712708  | FALSE |
| Rv1422  | 242  | 65  | 1,896495424 | -0,102666358 | -0,630042 | 0,5286673 | 0,598812094 | 0,13588197 | FALSE |
| Rv1423  | 320  | 94  | 1,767339243 | -0,231822539 | -1,673001 | 0,0943272 | 0,134841002 | 0,03059801 | FALSE |
| Rv1425  | 469  | 120 | 1,966553517 | -0,032608265 | -0,275235 | 0,7831359 | 0,824529665 | 0,18710162 | FALSE |
| Rv1426c | 244  | 47  | 2,376148486 | 0,376986704  | 2,1377276 | 0,0325389 | 0,052316861 | 0,0118717  | FALSE |
| Rv1430  | 42   | 5   | 3,070389328 | 1,071227546  | 2,2344354 | 0,0254544 | 0,042005148 | 0,00953177 | FALSE |
| Rv1431  | 80   | 11  | 2,862496476 | 0,863334694  | 2,5765282 | 0,0099798 | 0,018030395 | 0,00409144 | FALSE |
| Rv1432  | 45   | 14  | 1,684498174 | -0,314663608 | -0,863805 | 0,3876952 | 0,459663259 | 0,10429075 | FALSE |
| Rv1434  | 8    | 3   | 1,415037499 | -0,584124283 | -0,708414 | 0,4786884 | 0,551144976 | 0,12504713 | FALSE |
| Rv1439c | 52   | 13  | 2           | 0,000838218  | 0,002342  | 0,9981314 | 1           | 0,22680161 | FALSE |
| Rv1441c | 34   | 11  | 1,628031223 | -0,371130559 | -0,894287 | 0,3711682 | 0,442730163 | 0,10044879 | FALSE |
| Rv1443c | 104  | 28  | 1,893084796 | -0,106076986 | -0,426983 | 0,669392  | 0,72860002  | 0,16531053 | FALSE |
| Rv1447c | 627  | 124 | 2,338125322 | 0,338963541  | 3,1018633 | 0,0019231 | 0,004002415 | 0,00090822 | FALSE |

|         |      |     |             |              |           |           |             |            |       |
|---------|------|-----|-------------|--------------|-----------|-----------|-------------|------------|-------|
| Rv1449c | 1089 | 249 | 2,128786307 | 0,129624525  | 1,621257  | 0,1049625 | 0,149071733 | 0,0338048  | FALSE |
| Rv1450c | 68   | 15  | 2,180572246 | 0,181410464  | 0,5617563 | 0,574282  | 0,643182834 | 0,1458522  | FALSE |
| Rv1452c | 25   | 7   | 1,836501268 | -0,162660514 | -0,32417  | 0,7458095 | 0,793384364 | 0,18000988 | FALSE |
| Rv1453  | 19   | 4   | 2,247927513 | 0,248765732  | 0,402461  | 0,6873448 | 0,7426073   | 0,16848878 | FALSE |
| Rv1454c | 108  | 22  | 2,295455884 | 0,296294102  | 1,1335076 | 0,2570012 | 0,324044937 | 0,07353202 | FALSE |
| Rv1455  | 55   | 11  | 2,321928095 | 0,322766313  | 0,8771237 | 0,3804195 | 0,452669912 | 0,10270401 | FALSE |
| Rv1456c | 164  | 30  | 2,450661409 | 0,451499627  | 2,0720195 | 0,0382636 | 0,060900616 | 0,01381952 | FALSE |
| Rv1458c | 153  | 46  | 1,733825887 | -0,265335895 | -1,331702 | 0,1829583 | 0,241333566 | 0,05476322 | FALSE |
| Rv1459c | 238  | 71  | 1,745070644 | -0,254091138 | -1,587481 | 0,1124038 | 0,158159313 | 0,03587825 | FALSE |
| Rv1460  | 97   | 29  | 1,741931847 | -0,257229935 | -1,02649  | 0,3046606 | 0,375201008 | 0,08510132 | FALSE |
| Rv1465  | 129  | 49  | 1,396517411 | -0,602644371 | -2,944456 | 0,0032352 | 0,006486908 | 0,00147142 | FALSE |
| Rv1467c | 106  | 34  | 1,640457613 | -0,358704169 | -1,522914 | 0,1277803 | 0,17683004  | 0,04012613 | FALSE |
| Rv1469  | 161  | 36  | 2,160991877 | 0,161830095  | 0,7737275 | 0,4390919 | 0,513423837 | 0,11649059 | FALSE |
| Rv1470  | 40   | 4   | 3,321928095 | 1,322766313  | 2,5777685 | 0,0099441 | 0,017994664 | 0,00408106 | FALSE |
| Rv1471  | 45   | 7   | 2,684498174 | 0,685336392  | 1,5820256 | 0,1136437 | 0,159676127 | 0,03622363 | FALSE |
| Rv1473A | 48   | 16  | 1,584962501 | -0,414199281 | -1,19477  | 0,232177  | 0,297548713 | 0,06750855 | FALSE |
| Rv1474c | 104  | 16  | 2,700439718 | 0,701277936  | 2,4542361 | 0,0141184 | 0,024649435 | 0,00559224 | FALSE |
| Rv1475c | 1077 | 282 | 1,933251182 | -0,0659106   | -0,84808  | 0,3963933 | 0,468356822 | 0,10627916 | FALSE |
| Rv1476  | 301  | 62  | 2,279423366 | 0,280261584  | 1,7950019 | 0,0726534 | 0,106760433 | 0,02422599 | FALSE |
| Rv1477  | 901  | 195 | 2,208052982 | 0,2088912    | 2,3439183 | 0,0190824 | 0,032300769 | 0,00732536 | FALSE |
| Rv1478  | 339  | 60  | 2,498250868 | 0,499089086  | 3,2660972 | 0,0010904 | 0,002361653 | 0,0005359  | FALSE |
| Rv1480  | 444  | 113 | 1,974236904 | -0,024924878 | -0,204424 | 0,8380221 | 0,870236765 | 0,19747344 | FALSE |
| Rv1482c | 5    | 2   | 1,321928095 | -0,677233687 | -0,659883 | 0,5093289 | 0,580911835 | 0,13174386 | FALSE |
| Rv1484  | 679  | 184 | 1,883705808 | -0,115455974 | -1,189609 | 0,2342    | 0,299897656 | 0,06805254 | FALSE |
| Rv1487  | 554  | 166 | 1,738702735 | -0,260459047 | -2,485692 | 0,01293   | 0,022745668 | 0,00516143 | FALSE |
| Rv1488  | 731  | 156 | 2,228325377 | 0,229163595  | 2,3079065 | 0,0210043 | 0,035087295 | 0,00796198 | FALSE |
| Rv1489  | 299  | 71  | 2,074254555 | 0,075092773  | 0,4967005 | 0,6194003 | 0,68314169  | 0,15501797 | FALSE |
| Rv1490  | 43   | 4   | 3,426264755 | 1,427102973  | 2,8318375 | 0,0046281 | 0,008985168 | 0,00203841 | FALSE |
| Rv1491c | 149  | 45  | 1,727315424 | -0,271846358 | -1,347942 | 0,1776769 | 0,235707296 | 0,05348651 | FALSE |
| Rv1493  | 370  | 76  | 2,283453947 | 0,284292165  | 2,0173827 | 0,0436556 | 0,068378738 | 0,01551645 | FALSE |
| Rv1494  | 56   | 13  | 2,106915204 | 0,107753422  | 0,3066891 | 0,7590801 | 0,8050045   | 0,18264623 | FALSE |
| Rv1495  | 26   | 4   | 2,700439718 | 0,701277936  | 1,2270964 | 0,2197864 | 0,284022735 | 0,06441693 | FALSE |
| Rv1496  | 212  | 37  | 2,518467089 | 0,519305307  | 2,6779776 | 0,0074068 | 0,013812052 | 0,00313422 | FALSE |
| Rv1497  | 739  | 227 | 1,702882067 | -0,296279715 | -3,286242 | 0,0010153 | 0,002217324 | 0,00050315 | FALSE |
| Rv1499  | 17   | 1   | 4,087462841 | 2,088301059  | 2,3234536 | 0,0201548 | 0,033912342 | 0,00769208 | FALSE |
| Rv1503c | 179  | 29  | 2,625834782 | 0,626673     | 2,9147371 | 0,0035599 | 0,007073138 | 0,00160503 | FALSE |
| Rv1504c | 24   | 7   | 1,777607579 | -0,221554203 | -0,437057 | 0,6620699 | 0,722124953 | 0,16381872 | FALSE |

|         |      |     |             |              |           |           |             |            |       |
|---------|------|-----|-------------|--------------|-----------|-----------|-------------|------------|-------|
| Rv1507c | 226  | 42  | 2,42786154  | 0,428699758  | 2,3187005 | 0,0204113 | 0,034256207 | 0,00777339 | FALSE |
| Rv1508A | 74   | 9   | 3,039528364 | 1,040366582  | 2,8959365 | 0,0037803 | 0,00746967  | 0,00169501 | FALSE |
| Rv1509  | 196  | 40  | 2,292781749 | 0,293619967  | 1,5139599 | 0,130036  | 0,179510684 | 0,04073442 | FALSE |
| Rv1510  | 72   | 28  | 1,362570079 | -0,636591702 | -2,337343 | 0,0194214 | 0,03277613  | 0,00743753 | FALSE |
| Rv1512  | 252  | 54  | 2,222392421 | 0,223230639  | 1,3211714 | 0,1864442 | 0,245275498 | 0,05565772 | FALSE |
| Rv1513  | 146  | 24  | 2,604862058 | 0,605700276  | 2,5535315 | 0,0106637 | 0,019125731 | 0,00434    | FALSE |
| Rv1514c | 79   | 11  | 2,84434913  | 0,845187348  | 2,5144496 | 0,0119218 | 0,021175284 | 0,004804   | FALSE |
| Rv1516c | 76   | 13  | 2,547487795 | 0,548326013  | 1,6844711 | 0,0920907 | 0,132002739 | 0,02994852 | FALSE |
| Rv1518  | 8    | 0   | 4           | 2,000838218  | 1,5504405 | 0,1210358 | 0,168501698 | 0,03819582 | FALSE |
| Rv1519  | 7    | 0   | 3,807354922 | 1,80819314   | 1,355158  | 0,1753672 | 0,233310295 | 0,05286234 | FALSE |
| Rv1524  | 141  | 32  | 2,139551352 | 0,140389571  | 0,6304803 | 0,5283804 | 0,598659054 | 0,13584724 | FALSE |
| Rv1525  | 132  | 44  | 1,584962501 | -0,414199281 | -1,981357 | 0,0475513 | 0,073981164 | 0,01678775 | FALSE |
| Rv1526c | 33   | 4   | 3,044394119 | 1,045232337  | 1,9412739 | 0,0522251 | 0,080224203 | 0,01820087 | FALSE |
| Rv1527c | 745  | 167 | 2,157392323 | 0,158230541  | 1,6286372 | 0,1033898 | 0,146943979 | 0,03334386 | FALSE |
| Rv1531  | 152  | 46  | 1,724365557 | -0,274796224 | -1,376923 | 0,1685361 | 0,226013669 | 0,05128684 | FALSE |
| Rv1532c | 39   | 13  | 1,584962501 | -0,414199281 | -1,076948 | 0,2815037 | 0,350126279 | 0,07943841 | FALSE |
| Rv1534  | 113  | 35  | 1,690895945 | -0,308265836 | -1,339539 | 0,1803953 | 0,238351388 | 0,05408651 | FALSE |
| Rv1535  | 599  | 143 | 2,066540856 | 0,067379074  | 0,6317083 | 0,5275775 | 0,598265001 | 0,13575782 | FALSE |
| Rv1536  | 1187 | 265 | 2,16325567  | 0,164093888  | 2,1300239 | 0,0331696 | 0,053179289 | 0,0120674  | FALSE |
| Rv1537  | 54   | 8   | 2,754887502 | 0,75572572   | 1,8878521 | 0,0590458 | 0,089361733 | 0,02027789 | FALSE |
| Rv1538c | 109  | 29  | 1,91020333  | -0,088958452 | -0,365498 | 0,7147397 | 0,766431026 | 0,17391792 | FALSE |
| Rv1539  | 821  | 178 | 2,205504981 | 0,206343199  | 2,2110787 | 0,0270304 | 0,044253987 | 0,01004208 | FALSE |
| Rv1540  | 270  | 50  | 2,432959407 | 0,433797625  | 2,5622842 | 0,0103986 | 0,018692869 | 0,00424177 | FALSE |
| Rv1541c | 50   | 8   | 2,64385619  | 0,644694408  | 1,5797979 | 0,1141532 | 0,160277701 | 0,03635546 | FALSE |
| Rv1542c | NA   | NA  | NA          | NA           | NA        | NA        | NA          | NA         | FALSE |
| Rv1545  | 319  | 74  | 2,107959248 | 0,108797466  | 0,7389932 | 0,4599111 | 0,533810923 | 0,12113195 | FALSE |
| Rv1550  | 122  | 44  | 1,471305719 | -0,527856063 | -2,475794 | 0,013294  | 0,023334031 | 0,00529494 | FALSE |
| Rv1551  | 68   | 19  | 1,839535328 | -0,159626454 | -0,524393 | 0,600005  | 0,666597144 | 0,1512637  | FALSE |
| Rv1553  | 6    | 3   | 1           | -0,999161782 | -1,127672 | 0,2594587 | 0,326621426 | 0,07409303 | FALSE |
| Rv1554  | 13   | 1   | 3,700439718 | 1,701277936  | 1,7700667 | 0,076716  | 0,112228491 | 0,02544792 | FALSE |
| Rv1555  | 13   | 5   | 1,378511623 | -0,620650159 | -0,965617 | 0,3342359 | 0,406985636 | 0,09232435 | FALSE |
| Rv1556  | 51   | 7   | 2,86507042  | 0,865908638  | 2,0623932 | 0,0391703 | 0,062055718 | 0,01407623 | FALSE |
| Rv1557  | 222  | 54  | 2,039528364 | 0,040366582  | 0,2314535 | 0,8169625 | 0,853084526 | 0,19358127 | FALSE |
| Rv1558  | 104  | 40  | 1,378511623 | -0,620650159 | -2,731266 | 0,0063092 | 0,011974647 | 0,00271695 | FALSE |
| Rv1559  | 558  | 161 | 1,793204434 | -0,205957348 | -1,954092 | 0,0506904 | 0,078309011 | 0,01776749 | FALSE |
| Rv1560  | 71   | 12  | 2,564784619 | 0,565622837  | 1,6744484 | 0,0940425 | 0,134482841 | 0,03051674 | FALSE |
| Rv1561  | 64   | 12  | 2,415037499 | 0,415875717  | 1,1996054 | 0,2302926 | 0,29556592  | 0,06706958 | FALSE |

|         |      |      |             |              |           |           |             |            |       |
|---------|------|------|-------------|--------------|-----------|-----------|-------------|------------|-------|
| Rv1562c | 133  | 32   | 2,055282436 | 0,056120654  | 0,2483803 | 0,8038402 | 0,842169156 | 0,19107898 | FALSE |
| Rv1563c | 149  | 51   | 1,546743178 | -0,452418603 | -2,314616 | 0,0206339 | 0,034578405 | 0,00784484 | FALSE |
| Rv1564c | 404  | 80   | 2,336283388 | 0,337121606  | 2,4770057 | 0,013249  | 0,023265345 | 0,00527935 | FALSE |
| Rv1567c | 37   | 16   | 1,209453366 | -0,789708416 | -2,134425 | 0,032808  | 0,052706628 | 0,01196015 | FALSE |
| Rv1568  | 132  | 36   | 1,874469118 | -0,124692664 | -0,56729  | 0,5705174 | 0,639238805 | 0,14505556 | FALSE |
| Rv1570  | 131  | 38   | 1,785495488 | -0,213666294 | -0,983434 | 0,3253941 | 0,396831908 | 0,09004878 | FALSE |
| Rv1571  | 45   | 4    | 3,491853096 | 1,492691314  | 2,9958434 | 0,0027369 | 0,005546871 | 0,00125855 | FALSE |
| Rv1572c | 8    | 0    | 4           | 2,000838218  | 1,5504405 | 0,1210358 | 0,168501698 | 0,03819582 | FALSE |
| Rv1573  | 1    | 2    | -1          | -2,999161782 | -1,954274 | 0,0506689 | 0,078306429 | 0,01776749 | FALSE |
| Rv1574  | 2    | 0 NA | NA          | NA           | NA        | NA        | NA          | NA         | FALSE |
| Rv1575  | 1    | 0 NA | NA          | NA           | NA        | NA        | NA          | NA         | FALSE |
| Rv1576c | 195  | 65   | 1,584962501 | -0,414199281 | -2,408253 | 0,0160291 | 0,027546249 | 0,00624901 | FALSE |
| Rv1577c | 75   | 12   | 2,64385619  | 0,644694408  | 1,9348605 | 0,0530074 | 0,081173073 | 0,01841615 | FALSE |
| Rv1578c | 44   | 17   | 1,371968777 | -0,627193004 | -1,797261 | 0,0722942 | 0,106550265 | 0,0241712  | FALSE |
| Rv1579c | 5    | 1    | 2,321928095 | 0,322766313  | 0,2644593 | 0,791426  | 0,831371461 | 0,18857881 | FALSE |
| Rv1581c | 5    | 0    | 3,321928095 | 1,322766313  | 0,911373  | 0,3620989 | 0,433814702 | 0,09832204 | FALSE |
| Rv1583c | 10   | 3    | 1,736965594 | -0,262196188 | -0,336229 | 0,7366979 | 0,784855879 | 0,17809888 | FALSE |
| Rv1584c | 43   | 4    | 3,426264755 | 1,427102973  | 2,8318375 | 0,0046281 | 0,008985168 | 0,00203841 | FALSE |
| Rv1586c | 139  | 53   | 1,391020618 | -0,608141164 | -3,087281 | 0,00202   | 0,004188614 | 0,00095048 | FALSE |
| Rv1587c | 3    | 0 NA | NA          | NA           | NA        | NA        | NA          | NA         | FALSE |
| Rv1588c | 83   | 22   | 1,915607813 | -0,083553969 | -0,299282 | 0,7647249 | 0,809684555 | 0,18369394 | FALSE |
| Rv1589  | 419  | 95   | 2,140950825 | 0,141789043  | 1,0975002 | 0,2724228 | 0,340388249 | 0,0772284  | FALSE |
| Rv1591  | 374  | 118  | 1,664251411 | -0,334910371 | -2,660095 | 0,0078119 | 0,014478369 | 0,00328542 | FALSE |
| Rv1598c | 349  | 104  | 1,746643508 | -0,252518274 | -1,909997 | 0,0561335 | 0,085446047 | 0,01938935 | FALSE |
| Rv1603  | 365  | 111  | 1,717336787 | -0,281824994 | -2,191096 | 0,0284448 | 0,046415569 | 0,01053258 | FALSE |
| Rv1604  | 257  | 54   | 2,250737047 | 0,251575265  | 1,4962589 | 0,1345862 | 0,184564663 | 0,04188127 | FALSE |
| Rv1605  | 298  | 71   | 2,069421401 | 0,070259619  | 0,4643425 | 0,6424024 | 0,704178694 | 0,15979167 | FALSE |
| Rv1608c | 124  | 17   | 2,866733469 | 0,867571687  | 3,2211588 | 0,0012767 | 0,002739629 | 0,00062167 | FALSE |
| Rv1609  | 463  | 136  | 1,767405542 | -0,23175624  | -2,011879 | 0,0442327 | 0,069172821 | 0,01569664 | FALSE |
| Rv1611  | 1693 | 385  | 2,136651622 | 0,13748984   | 2,1415571 | 0,0322291 | 0,051903527 | 0,01177791 | FALSE |
| Rv1613  | 1291 | 348  | 1,891329789 | -0,107831992 | -1,530274 | 0,1259488 | 0,174663204 | 0,03963444 | FALSE |
| Rv1616  | 227  | 53   | 2,098628033 | 0,099466251  | 0,5708293 | 0,5681154 | 0,637271628 | 0,14460917 | FALSE |
| Rv1617  | 818  | 180  | 2,184103937 | 0,184942155  | 1,9854821 | 0,0470909 | 0,073351642 | 0,01664153 | FALSE |
| Rv1621c | 255  | 86   | 1,568088682 | -0,4310731   | -2,874586 | 0,0040456 | 0,007930304 | 0,00179954 | FALSE |
| Rv1622c | 237  | 79   | 1,584962501 | -0,414199281 | -2,655003 | 0,0079308 | 0,014684948 | 0,0033323  | FALSE |
| Rv1624c | 145  | 52   | 1,479469372 | -0,51969241  | -2,653619 | 0,0079634 | 0,014731489 | 0,00334286 | FALSE |
| Rv1626  | 1146 | 293  | 1,967634474 | -0,031527308 | -0,41598  | 0,6774246 | 0,735212592 | 0,16683386 | FALSE |

|         |      |     |             |              |           |           |             |            |       |
|---------|------|-----|-------------|--------------|-----------|-----------|-------------|------------|-------|
| Rv1629  | 338  | 67  | 2,334790246 | 0,335628464  | 2,2561705 | 0,02406   | 0,039837302 | 0,00903985 | FALSE |
| Rv1632c | 94   | 15  | 2,647698256 | 0,648536474  | 2,1775904 | 0,0294365 | 0,047826044 | 0,01085041 | FALSE |
| Rv1633  | 560  | 168 | 1,736965594 | -0,262196188 | -2,516547 | 0,0118511 | 0,021073388 | 0,00478196 | FALSE |
| Rv1638  | 1178 | 311 | 1,921353054 | -0,077808728 | -1,049262 | 0,2940577 | 0,364018736 | 0,08260284 | FALSE |
| Rv1640c | 354  | 63  | 2,490325627 | 0,491163845  | 3,2891018 | 0,0010051 | 0,00219857  | 0,00049873 | FALSE |
| Rv1643  | 625  | 176 | 1,828280761 | -0,170881021 | -1,705503 | 0,0881006 | 0,126952391 | 0,02880794 | FALSE |
| Rv1644  | 774  | 199 | 1,959565136 | -0,039596646 | -0,429915 | 0,6672574 | 0,726577351 | 0,16487436 | FALSE |
| Rv1645c | 211  | 44  | 2,26166757  | 0,262505788  | 1,4119665 | 0,1579598 | 0,213134985 | 0,04836442 | FALSE |
| Rv1646  | 619  | 171 | 1,855943084 | -0,143218698 | -1,41573  | 0,1568546 | 0,211788604 | 0,0480539  | FALSE |
| Rv1647  | 119  | 20  | 2,572889668 | 0,573727887  | 2,1957861 | 0,0281073 | 0,045902704 | 0,01041621 | FALSE |
| Rv1648  | 242  | 46  | 2,395301281 | 0,396139499  | 2,229695  | 0,0257677 | 0,042433319 | 0,00962894 | FALSE |
| Rv1649  | 250  | 45  | 2,473931188 | 0,474769406  | 2,6793226 | 0,0073771 | 0,013763194 | 0,00312313 | FALSE |
| Rv1650  | 606  | 184 | 1,719612027 | -0,279549754 | -2,79958  | 0,0051169 | 0,009854057 | 0,00223607 | FALSE |
| Rv1652  | 68   | 11  | 2,628031223 | 0,628869441  | 1,8020646 | 0,0715352 | 0,105471026 | 0,0239334  | FALSE |
| Rv1653  | 58   | 24  | 1,273018494 | -0,726143287 | -2,430352 | 0,0150842 | 0,026173351 | 0,00593924 | FALSE |
| Rv1654  | 78   | 26  | 1,584962501 | -0,414199281 | -1,523054 | 0,1277453 | 0,176843575 | 0,04012613 | FALSE |
| Rv1655  | 46   | 13  | 1,823122238 | -0,176039544 | -0,477001 | 0,6333614 | 0,695815446 | 0,15789389 | FALSE |
| Rv1656  | 76   | 13  | 2,547487795 | 0,548326013  | 1,6844711 | 0,0920907 | 0,132002739 | 0,02994852 | FALSE |
| Rv1657  | 54   | 9   | 2,584962501 | 0,585800719  | 1,5071001 | 0,131785  | 0,181543841 | 0,04119157 | FALSE |
| Rv1658  | 366  | 94  | 1,961110987 | -0,038050795 | -0,283981 | 0,7764246 | 0,819213102 | 0,18589519 | FALSE |
| Rv1659  | 195  | 37  | 2,397876948 | 0,398715166  | 2,0135884 | 0,0440528 | 0,068918719 | 0,01563898 | FALSE |
| Rv1661  | 919  | 252 | 1,866641128 | -0,132520654 | -1,593348 | 0,1110822 | 0,156579034 | 0,03553079 | FALSE |
| Rv1663  | 163  | 41  | 1,99117615  | -0,007985632 | -0,039564 | 0,9684407 | 0,978112732 | 0,22195257 | FALSE |
| Rv1664  | 465  | 120 | 1,95419631  | -0,044965471 | -0,378725 | 0,7048918 | 0,758345139 | 0,17208308 | FALSE |
| Rv1666c | 78   | 17  | 2,197939378 | 0,198777596  | 0,6572643 | 0,511011  | 0,582325143 | 0,13214076 | FALSE |
| Rv1667c | 62   | 9   | 2,784271309 | 0,785109527  | 2,0908474 | 0,0365417 | 0,058277661 | 0,01322432 | FALSE |
| Rv1668c | 100  | 27  | 1,888968688 | -0,110193094 | -0,435247 | 0,663383  | 0,723057262 | 0,1640456  | FALSE |
| Rv1669  | 6    | 2   | 1,584962501 | -0,414199281 | -0,422409 | 0,6727265 | 0,731623716 | 0,16595083 | FALSE |
| Rv1671  | 20   | 8   | 1,321928095 | -0,677233687 | -1,319773 | 0,1869107 | 0,245807227 | 0,05577838 | FALSE |
| Rv1672c | 114  | 37  | 1,623436649 | -0,375725133 | -1,65917  | 0,0970816 | 0,138552554 | 0,03143455 | FALSE |
| Rv1673c | 24   | 5   | 2,263034406 | 0,263872624  | 0,4785419 | 0,6322645 | 0,694997572 | 0,15766436 | FALSE |
| Rv1674c | 8    | 2   | 2           | 0,000838218  | 0,0009186 | 0,9992671 | 1           | 0,22680161 | FALSE |
| Rv1675c | 21   | 5   | 2,070389328 | 0,071227546  | 0,1249325 | 0,900577  | 0,922205786 | 0,20920151 | FALSE |
| Rv1677  | 431  | 110 | 1,970184346 | -0,028977436 | -0,23432  | 0,8147365 | 0,85188778  | 0,1933097  | FALSE |
| Rv1678  | 367  | 104 | 1,819196535 | -0,179965247 | -1,378447 | 0,1680654 | 0,225459169 | 0,05116102 | FALSE |
| Rv1679  | 335  | 79  | 2,084236537 | 0,085074755  | 0,5946166 | 0,5520998 | 0,621782312 | 0,14109435 | FALSE |
| Rv1680  | 133  | 32  | 2,055282436 | 0,056120654  | 0,2483803 | 0,8038402 | 0,842169156 | 0,19107898 | FALSE |



|         |     |     |             |              |           |           |             |            |       |
|---------|-----|-----|-------------|--------------|-----------|-----------|-------------|------------|-------|
| Rv1681  | 97  | 23  | 2,076350886 | 0,077189104  | 0,2906835 | 0,7712934 | 0,815107512 | 0,18496355 | FALSE |
| Rv1684  | 112 | 15  | 2,900464326 | 0,901302545  | 3,1618102 | 0,0015679 | 0,00332198  | 0,00075362 | FALSE |
| Rv1686c | 37  | 6   | 2,624490865 | 0,625329083  | 1,3225991 | 0,1859687 | 0,244731626 | 0,05553431 | FALSE |
| Rv1687c | 60  | 12  | 2,321928095 | 0,322766313  | 0,916127  | 0,3596003 | 0,431936539 | 0,09799977 | FALSE |
| Rv1688  | 34  | 5   | 2,765534746 | 0,766372964  | 1,5162936 | 0,1294451 | 0,178788871 | 0,04056353 | FALSE |
| Rv1689  | 384 | 103 | 1,898461974 | -0,100699808 | -0,778212 | 0,4364438 | 0,510478789 | 0,11583744 | FALSE |
| Rv1690  | 199 | 33  | 2,592230501 | 0,593068719  | 2,9254634 | 0,0034394 | 0,006861476 | 0,001557   | FALSE |
| Rv1694  | 501 | 134 | 1,902577603 | -0,096584179 | -0,851989 | 0,3942201 | 0,466627901 | 0,10588683 | FALSE |
| Rv1695  | 465 | 112 | 2,053731984 | 0,054570202  | 0,4517602 | 0,6514417 | 0,712305549 | 0,16163581 | FALSE |
| Rv1702c | 64  | 7   | 3,192645078 | 1,193483296  | 3,0086299 | 0,0026243 | 0,005335146 | 0,00121065 | FALSE |
| Rv1704c | 517 | 103 | 2,327519943 | 0,328358161  | 2,733475  | 0,006267  | 0,011906071 | 0,00270172 | FALSE |
| Rv1705c | 23  | 9   | 1,353636955 | -0,645524827 | -1,341642 | 0,179712  | 0,238046707 | 0,05399017 | FALSE |
| Rv1706A | NA  | NA  | NA          | NA           | NA        | NA        | NA          | NA         | FALSE |
| Rv1706c | 63  | 23  | 1,453717967 | -0,545443814 | -1,843972 | 0,0651873 | 0,097238481 | 0,02206528 | FALSE |
| Rv1707  | 422 | 103 | 2,034598662 | 0,03543688   | 0,2803965 | 0,7791733 | 0,821234483 | 0,18635388 | FALSE |
| Rv1711  | 365 | 104 | 1,811312936 | -0,187848846 | -1,436867 | 0,1507559 | 0,204183146 | 0,04633308 | FALSE |
| Rv1712  | 317 | 80  | 1,986410935 | -0,012750847 | -0,088175 | 0,9297379 | 0,945317379 | 0,21451067 | FALSE |
| Rv1713  | 418 | 132 | 1,662965013 | -0,336196769 | -2,823693 | 0,0047474 | 0,009205351 | 0,00208887 | FALSE |
| Rv1714  | 120 | 32  | 1,906890596 | -0,092271186 | -0,398008 | 0,6906241 | 0,745639632 | 0,16919996 | FALSE |
| Rv1715  | 22  | 4   | 2,459431619 | 0,460269837  | 0,7724372 | 0,4398556 | 0,513783596 | 0,1165356  | FALSE |
| Rv1716  | 41  | 7   | 2,550197083 | 0,551035301  | 1,2427442 | 0,2139621 | 0,277405163 | 0,06292787 | FALSE |
| Rv1717  | 8   | 1   | 3           | 1,000838218  | 0,9222841 | 0,3563804 | 0,429901931 | 0,09741892 | FALSE |
| Rv1718  | 78  | 21  | 1,893084796 | -0,106076986 | -0,369775 | 0,7115502 | 0,763841631 | 0,17333034 | FALSE |
| Rv1719  | 127 | 29  | 2,130703692 | 0,13154191   | 0,5615098 | 0,57445   | 0,643005784 | 0,1458522  | FALSE |
| Rv1720c | 19  | 1   | 4,247927513 | 2,248765732  | 2,5725352 | 0,0100957 | 0,018214691 | 0,00413137 | FALSE |
| Rv1721c | 9   | 4   | 1,169925001 | -0,82923678  | -1,11297  | 0,2657215 | 0,33275298  | 0,0754721  | FALSE |
| Rv1722  | 94  | 22  | 2,095157233 | 0,095995451  | 0,3547131 | 0,7228045 | 0,772872698 | 0,17535589 | FALSE |
| Rv1723  | 46  | 11  | 2,064130337 | 0,064968556  | 0,1688395 | 0,8659229 | 0,892279511 | 0,20244891 | FALSE |
| Rv1724c | 39  | 5   | 2,963474124 | 0,964312342  | 1,9745016 | 0,0483247 | 0,075066067 | 0,01702723 | FALSE |
| Rv1725c | 41  | 16  | 1,357552005 | -0,641609777 | -1,779225 | 0,0752028 | 0,110178276 | 0,02500157 | FALSE |
| Rv1726  | 7   | 3   | 1,222392421 | -0,776769361 | -0,91112  | 0,362232  | 0,433316091 | 0,09832774 | FALSE |
| Rv1727  | 3   | 0   | NA          | NA           | NA        | NA        | NA          | NA         | FALSE |
| Rv1729c | 47  | 8   | 2,554588852 | 0,55542707   | 1,3401595 | 0,1801935 | 0,238324342 | 0,05406224 | FALSE |
| Rv1731  | 269 | 72  | 1,901537361 | -0,097624421 | -0,631091 | 0,5279809 | 0,598550375 | 0,13581848 | FALSE |
| Rv1734c | 1   | 0   | NA          | NA           | NA        | NA        | NA          | NA         | FALSE |
| Rv1735c | 12  | 0   | 4,584962501 | 2,585800719  | 2,2174871 | 0,0265898 | 0,043641391 | 0,00989895 | FALSE |
| Rv1739c | 75  | 30  | 1,321928095 | -0,677233687 | -2,555781 | 0,010595  | 0,019015503 | 0,004314   | FALSE |

|         |      |      |             |              |           |           |             |            |       |
|---------|------|------|-------------|--------------|-----------|-----------|-------------|------------|-------|
| Rv1742  | 88   | 15   | 2,552541023 | 0,553379241  | 1,8276922 | 0,0675958 | 0,100527027 | 0,02280006 | FALSE |
| Rv1744c | 18   | 1    | 4,169925001 | 2,17076322   | 2,4499615 | 0,0142871 | 0,024872438 | 0,00564279 | FALSE |
| Rv1745c | 20   | 0    | 5,321928095 | 3,322766313  | 3,2376375 | 0,0012052 | 0,002592561 | 0,00058782 | FALSE |
| Rv1746  | 155  | 38   | 2,028196892 | 0,02903511   | 0,1393796 | 0,8891502 | 0,912281075 | 0,2070141  | FALSE |
| Rv1752  | 93   | 12   | 2,95419631  | 0,955034529  | 3,024622  | 0,0024894 | 0,00508723  | 0,00115439 | FALSE |
| Rv1755c | 7    | 0    | 3,807354922 | 1,80819314   | 1,355158  | 0,1753672 | 0,233310295 | 0,05286234 | FALSE |
| Rv1756c | 10   | 1    | 3,321928095 | 1,322766313  | 1,2888772 | 0,1974408 | 0,258363117 | 0,05860591 | FALSE |
| Rv1757c | 14   | 6    | 1,222392421 | -0,776769361 | -1,288522 | 0,1975643 | 0,258310528 | 0,05860591 | FALSE |
| Rv1758  | 2    | 0 NA | NA          | NA           | NA        | NA        | NA          | NA         | FALSE |
| Rv1759c | 25   | 7    | 1,836501268 | -0,162660514 | -0,32417  | 0,7458095 | 0,793384364 | 0,18000988 | FALSE |
| Rv1760  | 152  | 22   | 2,788495895 | 0,789334113  | 3,2890428 | 0,0010053 | 0,002197812 | 0,00049873 | FALSE |
| Rv1763  | 60   | 12   | 2,321928095 | 0,322766313  | 0,916127  | 0,3596003 | 0,431936539 | 0,09799977 | FALSE |
| Rv1764  | 28   | 2    | 3,807354922 | 1,80819314   | 2,7103247 | 0,0067217 | 0,012684465 | 0,00287534 | FALSE |
| Rv1765A | 4    | 2    | 1           | -0,999161782 | -0,920739 | 0,3571866 | 0,429888289 | 0,09752015 | FALSE |
| Rv1766  | 95   | 25   | 1,925999419 | -0,073162363 | -0,279862 | 0,7795836 | 0,821447453 | 0,18640221 | FALSE |
| Rv1767  | 38   | 12   | 1,662965013 | -0,336196769 | -0,851271 | 0,394619  | 0,466819798 | 0,10593038 | FALSE |
| Rv1768  | 253  | 58   | 2,12501258  | 0,125850798  | 0,7590162 | 0,4478429 | 0,521645704 | 0,11837143 | FALSE |
| Rv1770  | 1744 | 478  | 1,867317517 | -0,131844265 | -2,184042 | 0,0289592 | 0,047176802 | 0,01070532 | FALSE |
| Rv1771  | 610  | 149  | 2,033496912 | 0,03433513   | 0,3267163 | 0,7438825 | 0,791654767 | 0,17964167 | FALSE |
| Rv1773c | 55   | 15   | 1,874469118 | -0,124692664 | -0,366175 | 0,7142342 | 0,766201438 | 0,17384218 | FALSE |
| Rv1774  | 112  | 31   | 1,853158612 | -0,14600317  | -0,614115 | 0,5391395 | 0,608924976 | 0,13817677 | FALSE |
| Rv1776c | 22   | 4    | 2,459431619 | 0,460269837  | 0,7724372 | 0,4398556 | 0,513783596 | 0,1165356  | FALSE |
| Rv1777  | 19   | 7    | 1,440572591 | -0,55858919  | -1,039408 | 0,2986151 | 0,368907793 | 0,08369916 | FALSE |
| Rv1779c | 477  | 149  | 1,678676936 | -0,320484846 | -2,867662 | 0,0041352 | 0,008085826 | 0,00183483 | FALSE |
| Rv1780  | 128  | 31   | 2,04580369  | 0,046641908  | 0,2028442 | 0,8392568 | 0,870831057 | 0,19760829 | FALSE |
| Rv1782  | 1602 | 384  | 2,060695932 | 0,06153415   | 0,9446882 | 0,3448181 | 0,418064093 | 0,09486677 | FALSE |
| Rv1783  | 3585 | 821  | 2,126518992 | 0,12735721   | 2,8932682 | 0,0038126 | 0,007525885 | 0,00170777 | FALSE |
| Rv1785c | 175  | 33   | 2,406816992 | 0,407655211  | 1,9472765 | 0,0515016 | 0,079468811 | 0,018033   | FALSE |
| Rv1786  | 38   | 8    | 2,247927513 | 0,248765732  | 0,5691686 | 0,5692417 | 0,638172075 | 0,14477235 | FALSE |
| Rv1787  | 97   | 26   | 1,899473124 | -0,099688658 | -0,387099 | 0,6986828 | 0,753103313 | 0,17089361 | FALSE |
| Rv1788  | 23   | 5    | 2,201633861 | 0,202472079  | 0,3633038 | 0,716378  | 0,767353266 | 0,17407992 | FALSE |
| Rv1789  | 554  | 149  | 1,894573646 | -0,104588136 | -0,971529 | 0,3312848 | 0,403890898 | 0,0916506  | FALSE |
| Rv1790  | 78   | 23   | 1,761840263 | -0,237321519 | -0,846313 | 0,3973782 | 0,469379972 | 0,10651133 | FALSE |
| Rv1791  | 497  | 115  | 2,111611991 | 0,112450209  | 0,9528208 | 0,3406809 | 0,413938786 | 0,09393066 | FALSE |
| Rv1794  | 794  | 183  | 2,117295359 | 0,118133577  | 1,2640499 | 0,2062121 | 0,268504642 | 0,06092886 | FALSE |
| Rv1796  | 1170 | 324  | 1,852442812 | -0,14671897  | -1,995495 | 0,0459889 | 0,07177693  | 0,01628756 | FALSE |
| Rv1798  | 1775 | 431  | 2,04205925  | 0,042897468  | 0,6954998 | 0,4867421 | 0,55903054  | 0,12685477 | FALSE |

|         |      |     |             |              |           |           |             |            |       |
|---------|------|-----|-------------|--------------|-----------|-----------|-------------|------------|-------|
| Rv1799  | 87   | 30  | 1,5360529   | -0,463108882 | -1,813776 | 0,0697122 | 0,103110827 | 0,02339344 | FALSE |
| Rv1800  | 390  | 81  | 2,267480311 | 0,268318529  | 1,9602441 | 0,0499673 | 0,077373738 | 0,01755759 | FALSE |
| Rv1803c | 238  | 68  | 1,807354922 | -0,19180686  | -1,185482 | 0,2358268 | 0,301589188 | 0,06843638 | FALSE |
| Rv1804c | 21   | 5   | 2,070389328 | 0,071227546  | 0,1249325 | 0,900577  | 0,922205786 | 0,20920151 | FALSE |
| Rv1805c | 1    | 0   | NA          | NA           | NA        | NA        | NA          | NA         | FALSE |
| Rv1807  | 74   | 14  | 2,402098444 | 0,402936662  | 1,2526    | 0,2103513 | 0,273442855 | 0,06203834 | FALSE |
| Rv1809  | 148  | 29  | 2,351472371 | 0,352310589  | 1,5625526 | 0,1181579 | 0,165077809 | 0,03745933 | FALSE |
| Rv1810  | 85   | 18  | 2,239465935 | 0,240304153  | 0,8235151 | 0,4102152 | 0,481801249 | 0,10932996 | FALSE |
| Rv1811  | 264  | 73  | 1,85456956  | -0,144592221 | -0,933553 | 0,3505345 | 0,424342594 | 0,09629149 | FALSE |
| Rv1812c | 231  | 55  | 2,070389328 | 0,071227546  | 0,4143787 | 0,6785968 | 0,736282148 | 0,16707656 | FALSE |
| Rv1817  | 73   | 14  | 2,382469637 | 0,383307855  | 1,187534  | 0,235017  | 0,300748608 | 0,0682235  | FALSE |
| Rv1818c | 157  | 52  | 1,594181031 | -0,404980751 | -2,109407 | 0,0349095 | 0,055809883 | 0,01266433 | FALSE |
| Rv1820  | 324  | 106 | 1,611929548 | -0,387232234 | -2,888738 | 0,0038679 | 0,007619896 | 0,0017291  | FALSE |
| Rv1823  | 132  | 28  | 2,237039197 | 0,237877415  | 1,0163166 | 0,3094786 | 0,379889114 | 0,08620414 | FALSE |
| Rv1824  | 100  | 23  | 2,120294234 | 0,121132452  | 0,4596551 | 0,6457638 | 0,707077298 | 0,16044942 | FALSE |
| Rv1827  | 2425 | 585 | 2,051476217 | 0,052314436  | 0,989952  | 0,3221976 | 0,393542047 | 0,08930225 | FALSE |
| Rv1831  | 493  | 110 | 2,164084123 | 0,164922341  | 1,3791937 | 0,167835  | 0,225226746 | 0,05110828 | FALSE |
| Rv1833c | 69   | 13  | 2,408084739 | 0,408922957  | 1,2262379 | 0,2201092 | 0,28416059  | 0,0644815  | FALSE |
| Rv1834  | 12   | 10  | 0,263034406 | -1,736127376 | -3,148526 | 0,001641  | 0,003455395 | 0,00078371 | FALSE |
| Rv1836c | 942  | 225 | 2,065802058 | 0,066640277  | 0,7836785 | 0,4332288 | 0,507019082 | 0,11505237 | FALSE |
| Rv1838c | 62   | 8   | 2,95419631  | 0,955034529  | 2,4695777 | 0,0135273 | 0,023717063 | 0,00538066 | FALSE |
| Rv1839c | 113  | 16  | 2,820178962 | 0,821017181  | 2,9335271 | 0,0033513 | 0,00669929  | 0,0015202  | FALSE |
| Rv1840c | 25   | 10  | 1,321928095 | -0,677233687 | -1,475554 | 0,1400636 | 0,191178745 | 0,04337462 | FALSE |
| Rv1841c | 261  | 65  | 2,005538184 | 0,006376402  | 0,0398772 | 0,9681911 | 0,978111042 | 0,22195218 | FALSE |
| Rv1844c | 563  | 132 | 2,092596993 | 0,093435211  | 0,8454287 | 0,3978716 | 0,469821977 | 0,10661163 | FALSE |
| Rv1848  | 83   | 25  | 1,731183242 | -0,26797854  | -0,991045 | 0,3216634 | 0,393011292 | 0,08918181 | FALSE |
| Rv1849  | 31   | 7   | 2,146841388 | 0,147679606  | 0,3105752 | 0,7561236 | 0,802408562 | 0,18205742 | FALSE |
| Rv1850  | 172  | 54  | 1,671377253 | -0,327784529 | -1,763278 | 0,0778537 | 0,113724002 | 0,02580616 | FALSE |
| Rv1852  | 41   | 13  | 1,657112286 | -0,342049495 | -0,900542 | 0,3678317 | 0,43934832  | 0,09969657 | FALSE |
| Rv1854c | 551  | 107 | 2,364441522 | 0,36527974   | 3,1192328 | 0,0018132 | 0,003791816 | 0,00086044 | FALSE |
| Rv1855c | 241  | 40  | 2,590961241 | 0,591799459  | 3,213261  | 0,0013124 | 0,002808457 | 0,00063729 | FALSE |
| Rv1858  | 53   | 11  | 2,268488836 | 0,269327054  | 0,7251549 | 0,468357  | 0,541383366 | 0,12285029 | FALSE |
| Rv1860  | 183  | 36  | 2,345774837 | 0,346613055  | 1,711123  | 0,0870584 | 0,125864493 | 0,02856107 | FALSE |
| Rv1861  | 87   | 26  | 1,742503778 | -0,256658004 | -0,969879 | 0,3321069 | 0,4047681   | 0,09184966 | FALSE |
| Rv1864c | 112  | 34  | 1,719892081 | -0,279269701 | -1,202101 | 0,2293242 | 0,294514742 | 0,066821   | FALSE |
| Rv1866  | 126  | 18  | 2,807354922 | 0,80819314   | 3,0560852 | 0,0022425 | 0,004611221 | 0,00104637 | FALSE |
| Rv1867  | 86   | 24  | 1,841302254 | -0,157859528 | -0,583025 | 0,5598764 | 0,629282611 | 0,14279631 | FALSE |

|         |       |      |              |              |           |           |             |            |       |
|---------|-------|------|--------------|--------------|-----------|-----------|-------------|------------|-------|
| Rv1868  | 249   | 48   | 2,375039431  | 0,375877649  | 2,153583  | 0,0312729 | 0,050590759 | 0,01148001 | FALSE |
| Rv1869c | 720   | 179  | 2,008037319  | 0,008875537  | 0,0921634 | 0,9265682 | 0,942337563 | 0,21383449 | FALSE |
| Rv1872c | 12464 | 3020 | 2,045146684  | 0,045984902  | 1,9806089 | 0,0476352 | 0,074082427 | 0,01681073 | FALSE |
| Rv1873  | 10    | 0    | 4,321928095  | 2,322766313  | 1,903164  | 0,0570192 | 0,086593586 | 0,01963463 | FALSE |
| Rv1874  | 68    | 15   | 2,180572246  | 0,181410464  | 0,5617563 | 0,574282  | 0,643182834 | 0,1458522  | FALSE |
| Rv1875  | 105   | 14   | 2,906890596  | 0,907728814  | 3,0798011 | 0,0020714 | 0,004281739 | 0,00097161 | FALSE |
| Rv1878  | 85    | 10   | 3,087462841  | 1,088301059  | 3,2198727 | 0,0012825 | 0,002750453 | 0,00062413 | FALSE |
| Rv1879  | 38    | 14   | 1,440572591  | -0,55858919  | -1,469954 | 0,1415741 | 0,193073439 | 0,04381207 | FALSE |
| Rv1880c | 753   | 207  | 1,863019097  | -0,136142685 | -1,482559 | 0,1381916 | 0,188852255 | 0,0428542  | FALSE |
| Rv1881c | 262   | 57   | 2,200532987  | 0,201371205  | 1,2198308 | 0,222529  | 0,287002767 | 0,06511764 | FALSE |
| Rv1887  | 1853  | 409  | 2,179690133  | 0,180528351  | 2,9200517 | 0,0034997 | 0,006974708 | 0,00158121 | FALSE |
| Rv1888A | 3     | 2    | 0,584962501  | -1,414199281 | -1,212765 | 0,2252197 | 0,289715063 | 0,06572048 | FALSE |
| Rv1888c | 147   | 25   | 2,555816155  | 0,556654373  | 2,3748859 | 0,0175544 | 0,029906894 | 0,00678645 | FALSE |
| Rv1889c | 4     | 5    | -0,321928095 | -2,321089877 | -2,689541 | 0,007155  | 0,013393187 | 0,00303917 | FALSE |
| Rv1890c | 19    | 2    | 3,247927513  | 1,248765732  | 1,6988539 | 0,0893467 | 0,128560168 | 0,02916213 | FALSE |
| Rv1895  | 101   | 27   | 1,903323981  | -0,095837801 | -0,379489 | 0,704325  | 0,75794212  | 0,17199163 | FALSE |
| Rv1897c | 21    | 3    | 2,807354922  | 0,80819314   | 1,247613  | 0,2121728 | 0,2755382   | 0,06252491 | FALSE |
| Rv1898  | 136   | 27   | 2,332575339  | 0,333413557  | 1,4221706 | 0,1549767 | 0,209468198 | 0,04753236 | FALSE |
| Rv1901  | 285   | 66   | 2,11042399   | 0,111262208  | 0,7140141 | 0,4752184 | 0,548189986 | 0,12439484 | FALSE |
| Rv1902c | 173   | 30   | 2,527737632  | 0,52857585   | 2,4583561 | 0,0139575 | 0,024390011 | 0,00553456 | FALSE |
| Rv1903  | 48    | 10   | 2,263034406  | 0,263872624  | 0,6767648 | 0,4985552 | 0,571516272 | 0,12966918 | FALSE |
| Rv1904  | 602   | 181  | 1,73377379   | -0,265387992 | -2,642471 | 0,0082304 | 0,015168461 | 0,00344202 | FALSE |
| Rv1910c | 83    | 27   | 1,620151929  | -0,379009853 | -1,428895 | 0,1530343 | 0,207126737 | 0,04700104 | FALSE |
| Rv1914c | 249   | 67   | 1,893912742  | -0,10524904  | -0,655461 | 0,5121712 | 0,583478716 | 0,13240253 | FALSE |
| Rv1915  | 786   | 169  | 2,217506066  | 0,218344284  | 2,284483  | 0,0223432 | 0,037229162 | 0,00844801 | FALSE |
| Rv1916  | 383   | 103  | 1,894700055  | -0,104461727 | -0,806758 | 0,4198057 | 0,492478766 | 0,11175289 | FALSE |
| Rv1918c | 190   | 30   | 2,662965013  | 0,663803231  | 3,1604912 | 0,001575  | 0,003333476 | 0,00075623 | FALSE |
| Rv1919c | 555   | 108  | 2,361456459  | 0,362294677  | 3,1065618 | 0,0018928 | 0,003943515 | 0,00089469 | FALSE |
| Rv1920  | 157   | 23   | 2,771058793  | 0,771897011  | 3,2787544 | 0,0010427 | 0,002270715 | 0,00051511 | FALSE |
| Rv1921c | 37    | 10   | 1,887525271  | -0,111636511 | -0,268281 | 0,7884834 | 0,829384867 | 0,18817826 | FALSE |
| Rv1922  | 78    | 10   | 2,963474124  | 0,964312342  | 2,7923894 | 0,005232  | 0,010051215 | 0,00228081 | FALSE |
| Rv1924c | 114   | 40   | 1,510961919  | -0,488199863 | -2,198282 | 0,027929  | 0,045668357 | 0,01036303 | FALSE |
| Rv1928c | 66    | 16   | 2,044394119  | 0,045232337  | 0,1412865 | 0,8876436 | 0,911090778 | 0,2067171  | FALSE |
| Rv1929c | 147   | 27   | 2,444784843  | 0,445623061  | 1,9381229 | 0,0526082 | 0,080765612 | 0,01832727 | FALSE |
| Rv1930c | 4     | 2    | 1            | -0,999161782 | -0,920739 | 0,3571866 | 0,429888289 | 0,09752015 | FALSE |
| Rv1931c | 70    | 23   | 1,605721061  | -0,393440721 | -1,3656   | 0,1720646 | 0,230275822 | 0,05225401 | FALSE |
| Rv1933c | 6     | 3    | 1            | -0,999161782 | -1,127672 | 0,2594587 | 0,326621426 | 0,07409303 | FALSE |

|         |     |    |              |              |           |           |             |            |       |
|---------|-----|----|--------------|--------------|-----------|-----------|-------------|------------|-------|
| Rv1934c | 11  | 3  | 1,874469118  | -0,124692664 | -0,163756 | 0,8699229 | 0,895699199 | 0,20322483 | FALSE |
| Rv1936  | 100 | 24 | 2,058893689  | 0,059731907  | 0,2290863 | 0,8188019 | 0,854326598 | 0,19386312 | FALSE |
| Rv1938  | 44  | 15 | 1,552541023  | -0,446620759 | -1,240392 | 0,2148305 | 0,278210907 | 0,06310067 | FALSE |
| Rv1939  | 28  | 5  | 2,485426827  | 0,486265045  | 0,9165067 | 0,3594012 | 0,432026304 | 0,09799977 | FALSE |
| Rv1940  | 72  | 25 | 1,526068812  | -0,47309297  | -1,688507 | 0,091314  | 0,1311277   | 0,02974998 | FALSE |
| Rv1941  | 71  | 11 | 2,690315501  | 0,691153719  | 2,0020366 | 0,0452808 | 0,070727698 | 0,01604947 | FALSE |
| Rv1942c | 91  | 21 | 2,115477217  | 0,116315436  | 0,4213967 | 0,6734655 | 0,731519633 | 0,16599586 | FALSE |
| Rv1943c | 62  | 12 | 2,36923381   | 0,370072028  | 1,0590438 | 0,2895798 | 0,358756958 | 0,08139606 | FALSE |
| Rv1944c | 19  | 5  | 1,925999419  | -0,073162363 | -0,125155 | 0,9004007 | 0,922504347 | 0,20920151 | FALSE |
| Rv1945  | 110 | 38 | 1,5334322    | -0,465729582 | -2,051973 | 0,0401723 | 0,063375765 | 0,01438118 | FALSE |
| Rv1946c | 6   | 0  | 3,584962501  | 1,585800719  | 1,1435548 | 0,2528083 | 0,319883217 | 0,07249462 | FALSE |
| Rv1948c | 21  | 1  | 4,392317423  | 2,393155641  | 2,8070784 | 0,0049993 | 0,009653498 | 0,00219003 | FALSE |
| Rv1949c | 76  | 22 | 1,788495895  | -0,210665887 | -0,738144 | 0,4604269 | 0,534095209 | 0,12119646 | FALSE |
| Rv1951c | 15  | 2  | 2,906890596  | 0,907728814  | 1,1640334 | 0,2444105 | 0,311505887 | 0,07067525 | FALSE |
| Rv1953  | 29  | 2  | 3,857980995  | 1,858819213  | 2,8107595 | 0,0049425 | 0,009555446 | 0,00216831 | FALSE |
| Rv1954A | 289 | 80 | 1,852997588  | -0,146164194 | -0,987651 | 0,3233235 | 0,394550691 | 0,08953113 | FALSE |
| Rv1954c | 8   | 1  | 3            | 1,000838218  | 0,9222841 | 0,3563804 | 0,429901931 | 0,09741892 | FALSE |
| Rv1955  | 75  | 13 | 2,528378972  | 0,52921719   | 1,6203936 | 0,1051477 | 0,149119993 | 0,03383819 | FALSE |
| Rv1956  | 71  | 9  | 2,979822118  | 0,980660336  | 2,7016418 | 0,0068998 | 0,012980123 | 0,00294474 | FALSE |
| Rv1961  | 8   | 1  | 3            | 1,000838218  | 0,9222841 | 0,3563804 | 0,429901931 | 0,09741892 | FALSE |
| Rv1962c | 68  | 8  | 3,087462841  | 1,088301059  | 2,879932  | 0,0039776 | 0,007804821 | 0,00177106 | FALSE |
| Rv1963c | 98  | 21 | 2,222392421  | 0,223230639  | 0,8238613 | 0,4100184 | 0,481785311 | 0,10931006 | FALSE |
| Rv1964  | 20  | 1  | 4,321928095  | 2,322766313  | 2,6914838 | 0,0071135 | 0,013340765 | 0,00302584 | FALSE |
| Rv1965  | 19  | 10 | 0,925999419  | -1,073162363 | -2,183157 | 0,0290243 | 0,047253553 | 0,01072053 | FALSE |
| Rv1966  | 24  | 6  | 2            | 0,000838218  | 0,001591  | 0,9987305 | 1           | 0,22680161 | FALSE |
| Rv1967  | 13  | 5  | 1,378511623  | -0,620650159 | -0,965617 | 0,3342359 | 0,406985636 | 0,09232435 | FALSE |
| Rv1968  | 6   | 0  | 3,584962501  | 1,585800719  | 1,1435548 | 0,2528083 | 0,319883217 | 0,07249462 | FALSE |
| Rv1969  | 3   | 4  | -0,415037499 | -2,414199281 | -2,46205  | 0,0138145 | 0,024161642 | 0,00548066 | FALSE |
| Rv1970  | 16  | 1  | 4            | 2,000838218  | 2,1926565 | 0,0283321 | 0,046250809 | 0,0104952  | FALSE |
| Rv1971  | 26  | 7  | 1,893084796  | -0,106076986 | -0,213486 | 0,8309477 | 0,864027845 | 0,19606452 | FALSE |
| Rv1972  | 13  | 5  | 1,378511623  | -0,620650159 | -0,965617 | 0,3342359 | 0,406985636 | 0,09232435 | FALSE |
| Rv1973  | 2   | 0  | NA           | NA           | NA        | NA        | NA          | NA         | FALSE |
| Rv1974  | 2   | 0  | NA           | NA           | NA        | NA        | NA          | NA         | FALSE |
| Rv1975  | 2   | 0  | NA           | NA           | NA        | NA        | NA          | NA         | FALSE |
| Rv1977  | 124 | 18 | 2,784271309  | 0,785109527  | 2,9569449 | 0,003107  | 0,006258504 | 0,00142017 | FALSE |
| Rv1978  | 75  | 21 | 1,836501268  | -0,162660514 | -0,561487 | 0,5744655 | 0,642749461 | 0,1458522  | FALSE |
| Rv1982A | 37  | 9  | 2,039528364  | 0,040366582  | 0,0944855 | 0,9247235 | 0,941310993 | 0,21357398 | FALSE |

|         |      |     |             |              |           |           |             |            |       |
|---------|------|-----|-------------|--------------|-----------|-----------|-------------|------------|-------|
| Rv1983  | 159  | 24  | 2,727920455 | 0,728758673  | 3,1385489 | 0,0016979 | 0,003571404 | 0,00081042 | FALSE |
| Rv1986  | 97   | 12  | 3,014950341 | 1,01578856   | 3,2510805 | 0,0011497 | 0,002483193 | 0,00056348 | FALSE |
| Rv1989c | 269  | 71  | 1,921715243 | -0,077446539 | -0,498904 | 0,6178471 | 0,681810026 | 0,15471579 | FALSE |
| Rv1990A | 79   | 10  | 2,981852653 | 0,982690871  | 2,854686  | 0,0043079 | 0,008390377 | 0,001903   | FALSE |
| Rv1995  | 11   | 1   | 3,459431619 | 1,460269837  | 1,4571684 | 0,1450699 | 0,197567576 | 0,0448164  | FALSE |
| Rv1997  | 425  | 93  | 2,19216022  | 0,192998438  | 1,4912454 | 0,1358971 | 0,186232831 | 0,04225981 | FALSE |
| Rv1998c | 30   | 15  | 1           | -0,999161782 | -2,521575 | 0,0116831 | 0,020793352 | 0,00471841 | FALSE |
| Rv1999c | 9    | 2   | 2,169925001 | 0,17076322   | 0,1927264 | 0,8471733 | 0,877083966 | 0,19894886 | FALSE |
| Rv2003c | 96   | 14  | 2,777607579 | 0,778445797  | 2,5826466 | 0,0098046 | 0,017770781 | 0,00403253 | FALSE |
| Rv2004c | 308  | 58  | 2,408805546 | 0,409643764  | 2,5951477 | 0,009455  | 0,017192545 | 0,00390132 | FALSE |
| Rv2006  | 275  | 50  | 2,459431619 | 0,460269837  | 2,7311474 | 0,0063114 | 0,011973186 | 0,00271695 | FALSE |
| Rv2008c | 16   | 0   | 5           | 3,000838218  | 2,7653074 | 0,0056869 | 0,010885321 | 0,00246829 | FALSE |
| Rv2011c | 8    | 1   | 3           | 1,000838218  | 0,9222841 | 0,3563804 | 0,429901931 | 0,09741892 | FALSE |
| Rv2012  | 20   | 0   | 5,321928095 | 3,322766313  | 3,2376375 | 0,0012052 | 0,002592561 | 0,00058782 | FALSE |
| Rv2013  | NA   | NA  | NA          | NA           | NA        | NA        | NA          | NA         | FALSE |
| Rv2014  | 1    | 0   | NA          | NA           | NA        | NA        | NA          | NA         | FALSE |
| Rv2016  | 32   | 4   | 3           | 1,000838218  | 1,8445772 | 0,0650991 | 0,097217241 | 0,02204745 | FALSE |
| Rv2017  | 58   | 15  | 1,9510904   | -0,048071382 | -0,143054 | 0,8862472 | 0,910012709 | 0,20649936 | FALSE |
| Rv2018  | 149  | 30  | 2,312277925 | 0,313116143  | 1,4028999 | 0,1606467 | 0,216390212 | 0,0491031  | FALSE |
| Rv2023c | 45   | 16  | 1,491853096 | -0,507308686 | -1,439925 | 0,1498887 | 0,203357803 | 0,04614579 | FALSE |
| Rv2025c | 24   | 1   | 4,584962501 | 2,585800719  | 3,1360048 | 0,0017127 | 0,003599652 | 0,00081661 | FALSE |
| Rv2026c | 124  | 27  | 2,199308808 | 0,200147026  | 0,8342335 | 0,4041494 | 0,47623705  | 0,10806733 | FALSE |
| Rv2033c | 176  | 34  | 2,371968777 | 0,372806996  | 1,7967139 | 0,0723811 | 0,106558746 | 0,0241712  | FALSE |
| Rv2034  | 20   | 0   | 5,321928095 | 3,322766313  | 3,2376375 | 0,0012052 | 0,002592561 | 0,00058782 | FALSE |
| Rv2038c | 168  | 32  | 2,392317423 | 0,393155641  | 1,8446981 | 0,0650815 | 0,097283053 | 0,02204745 | FALSE |
| Rv2039c | 66   | 21  | 1,652076697 | -0,347085085 | -1,160416 | 0,2458795 | 0,313175748 | 0,07105412 | FALSE |
| Rv2043c | 168  | 45  | 1,900464326 | -0,098697455 | -0,504296 | 0,6140532 | 0,679524621 | 0,15419719 | FALSE |
| Rv2044c | 4    | 3   | 0,415037499 | -1,584124283 | -1,615523 | 0,1061976 | 0,150365522 | 0,0341147  | FALSE |
| Rv2046  | 109  | 31  | 1,813988014 | -0,185173767 | -0,773604 | 0,439165  | 0,513357119 | 0,11649059 | FALSE |
| Rv2049c | 40   | 17  | 1,234465254 | -0,764696528 | -2,139688 | 0,03238   | 0,052082631 | 0,01181855 | FALSE |
| Rv2051c | 1201 | 255 | 2,235666999 | 0,236505217  | 3,0494926 | 0,0022923 | 0,004703831 | 0,00106739 | FALSE |
| Rv2054  | 175  | 38  | 2,203283598 | 0,204121817  | 1,01005   | 0,3124714 | 0,383085801 | 0,08692953 | FALSE |
| Rv2055c | 24   | 4   | 2,584962501 | 0,585800719  | 1,0047263 | 0,3150286 | 0,385861172 | 0,08753213 | FALSE |
| Rv2056c | 22   | 1   | 4,459431619 | 2,460269837  | 2,9195587 | 0,0035053 | 0,006975176 | 0,00158121 | FALSE |
| Rv2060  | NA   | NA  | NA          | NA           | NA        | NA        | NA          | NA         | FALSE |
| Rv2061c | 127  | 50  | 1,344828497 | -0,654333285 | -3,200663 | 0,0013711 | 0,002924652 | 0,00066366 | FALSE |
| Rv2062c | 472  | 148 | 1,673189684 | -0,325972098 | -2,90419  | 0,003682  | 0,007286488 | 0,00165344 | FALSE |

|         |     |     |             |              |           |           |             |            |       |
|---------|-----|-----|-------------|--------------|-----------|-----------|-------------|------------|-------|
| Rv2063  | 22  | 4   | 2,459431619 | 0,460269837  | 0,7724372 | 0,4398556 | 0,513783596 | 0,1165356  | FALSE |
| Rv2063A | 7   | 0   | 3,807354922 | 1,80819314   | 1,355158  | 0,1753672 | 0,233310295 | 0,05286234 | FALSE |
| Rv2064  | 45  | 22  | 1,032421478 | -0,966740304 | -2,971352 | 0,0029649 | 0,005987522 | 0,00135868 | FALSE |
| Rv2065  | 87  | 30  | 1,5360529   | -0,463108882 | -1,813776 | 0,0697122 | 0,103110827 | 0,02339344 | FALSE |
| Rv2067c | 385 | 105 | 1,874469118 | -0,124692664 | -0,968905 | 0,3325925 | 0,405234669 | 0,09195553 | FALSE |
| Rv2068c | 603 | 129 | 2,224786936 | 0,225625155  | 2,0649601 | 0,0389268 | 0,061781576 | 0,01401943 | FALSE |
| Rv2071c | 13  | 9   | 0,530514717 | -1,468647065 | -2,646636 | 0,0081297 | 0,015018008 | 0,00340669 | FALSE |
| Rv2072c | 54  | 11  | 2,295455884 | 0,296294102  | 0,8014997 | 0,4228424 | 0,495893727 | 0,11252781 | FALSE |
| Rv2074  | 408 | 94  | 2,11783649  | 0,118674708  | 0,9100846 | 0,3627779 | 0,433705953 | 0,09841621 | FALSE |
| Rv2075c | 115 | 20  | 2,523561956 | 0,524400174  | 1,9899145 | 0,0466004 | 0,072616286 | 0,01647803 | FALSE |
| Rv2076c | 190 | 30  | 2,662965013 | 0,663803231  | 3,1604912 | 0,001575  | 0,003333476 | 0,00075623 | FALSE |
| Rv2077A | 6   | 2   | 1,584962501 | -0,414199281 | -0,422409 | 0,6727265 | 0,731623716 | 0,16595083 | FALSE |
| Rv2079  | 367 | 89  | 2,043902822 | 0,04474104   | 0,3296043 | 0,7416989 | 0,789757191 | 0,17921108 | FALSE |
| Rv2081c | 87  | 25  | 1,799087306 | -0,200074476 | -0,748679 | 0,4540506 | 0,527785263 | 0,11976461 | FALSE |
| Rv2082  | 694 | 175 | 1,987580741 | -0,011581041 | -0,118485 | 0,9056837 | 0,926352855 | 0,21020726 | FALSE |
| Rv2083  | 168 | 58  | 1,534336428 | -0,464825354 | -2,530617 | 0,0113862 | 0,020319999 | 0,004611   | FALSE |
| Rv2084  | 279 | 79  | 1,820340564 | -0,178821218 | -1,193965 | 0,2324916 | 0,297806743 | 0,06757807 | FALSE |
| Rv2086  | 8   | 4   | 1           | -0,999161782 | -1,302124 | 0,192874  | 0,253016808 | 0,05740483 | FALSE |
| Rv2087  | 16  | 7   | 1,192645078 | -0,806516704 | -1,437633 | 0,1505381 | 0,20399323  | 0,04628203 | FALSE |
| Rv2089c | 43  | 13  | 1,725825037 | -0,273336745 | -0,728257 | 0,4664564 | 0,539740122 | 0,12245944 | FALSE |
| Rv2090  | 31  | 3   | 3,36923381  | 1,370072028  | 2,3312786 | 0,0197387 | 0,033283169 | 0,00755259 | FALSE |
| Rv2091c | 807 | 231 | 1,804675822 | -0,19448596  | -2,214855 | 0,02677   | 0,043864149 | 0,00995362 | FALSE |
| Rv2093c | 570 | 170 | 1,745427173 | -0,253734609 | -2,453387 | 0,0141518 | 0,024674902 | 0,00559921 | FALSE |
| Rv2095c | 250 | 85  | 1,556393349 | -0,442768433 | -2,929412 | 0,003396  | 0,00678176  | 0,00153891 | FALSE |
| Rv2096c | 296 | 100 | 1,565597176 | -0,433564606 | -3,116358 | 0,001831  | 0,003822894 | 0,00086749 | FALSE |
| Rv2102  | 433 | 108 | 2,003335713 | 0,004173931  | 0,033636  | 0,9731674 | 0,982006437 | 0,22280762 | FALSE |
| Rv2103c | 79  | 24  | 1,718818247 | -0,280343534 | -1,013651 | 0,3107491 | 0,381329949 | 0,08653109 | FALSE |
| Rv2104c | 167 | 42  | 1,99138687  | -0,007774912 | -0,038988 | 0,9688996 | 0,978325689 | 0,22200089 | FALSE |
| Rv2105  | 54  | 10  | 2,432959407 | 0,433797625  | 1,145827  | 0,2518667 | 0,319357802 | 0,07245677 | FALSE |
| Rv2106  | 19  | 2   | 3,247927513 | 1,248765732  | 1,6988539 | 0,0893467 | 0,128560168 | 0,02916213 | FALSE |
| Rv2107  | 19  | 0   | 5,247927513 | 3,248765732  | 3,1251991 | 0,0017768 | 0,00372166  | 0,00084407 | FALSE |
| Rv2109c | 762 | 157 | 2,279026439 | 0,279864657  | 2,8525013 | 0,0043377 | 0,008439933 | 0,00191518 | FALSE |
| Rv2117  | 14  | 6   | 1,222392421 | -0,776769361 | -1,288522 | 0,1975643 | 0,258310528 | 0,05860591 | FALSE |
| Rv2118c | 144 | 35  | 2,040641984 | 0,041480203  | 0,1915111 | 0,8481252 | 0,877493657 | 0,19912017 | FALSE |
| Rv2119  | 113 | 20  | 2,498250868 | 0,499089086  | 1,8855788 | 0,0593517 | 0,089738633 | 0,02035952 | FALSE |
| Rv2120c | 118 | 19  | 2,634715536 | 0,635553754  | 2,3963523 | 0,0165592 | 0,028272449 | 0,00641556 | FALSE |
| Rv2122c | 16  | 0   | 5           | 3,000838218  | 2,7653074 | 0,0056869 | 0,010885321 | 0,00246829 | FALSE |

|         |      |     |             |              |           |           |             |            |       |
|---------|------|-----|-------------|--------------|-----------|-----------|-------------|------------|-------|
| Rv2123  | 3    | 2   | 0,584962501 | -1,414199281 | -1,212765 | 0,2252197 | 0,289715063 | 0,06572048 | FALSE |
| Rv2125  | 257  | 74  | 1,796171184 | -0,202990598 | -1,306259 | 0,1914645 | 0,251376881 | 0,05704224 | FALSE |
| Rv2126c | 9    | 2   | 2,169925001 | 0,17076322   | 0,1927264 | 0,8471733 | 0,877083966 | 0,19894886 | FALSE |
| Rv2129c | 114  | 23  | 2,309328058 | 0,310166276  | 1,2161669 | 0,2239213 | 0,288421228 | 0,06544832 | FALSE |
| Rv2130c | 564  | 172 | 1,713286598 | -0,285875184 | -2,764928 | 0,0056935 | 0,010884772 | 0,00246996 | FALSE |
| Rv2132  | 43   | 12  | 1,841302254 | -0,157859528 | -0,412256 | 0,6801521 | 0,736753618 | 0,16715256 | FALSE |
| Rv2133c | 137  | 29  | 2,240051088 | 0,240889306  | 1,04795   | 0,2946617 | 0,364651889 | 0,08274652 | FALSE |
| Rv2135c | 152  | 40  | 1,925999419 | -0,073162363 | -0,354006 | 0,7233343 | 0,773124802 | 0,17543687 | FALSE |
| Rv2138  | 154  | 37  | 2,057333175 | 0,058171393  | 0,2769406 | 0,7818257 | 0,823370019 | 0,18683847 | FALSE |
| Rv2141c | 119  | 36  | 1,724892762 | -0,27426902  | -1,215859 | 0,2240387 | 0,288478226 | 0,06546125 | FALSE |
| Rv2146c | 508  | 103 | 2,30218416  | 0,303022378  | 2,5115092 | 0,0120216 | 0,021318908 | 0,00483767 | FALSE |
| Rv2148c | 208  | 50  | 2,056583528 | 0,057421746  | 0,3177517 | 0,7506733 | 0,797805309 | 0,18103735 | FALSE |
| Rv2149c | 245  | 64  | 1,936637939 | -0,062523843 | -0,38339  | 0,7014304 | 0,755239278 | 0,1713783  | FALSE |
| Rv2150c | 1047 | 264 | 1,987651608 | -0,011510174 | -0,144653 | 0,8849845 | 0,908952851 | 0,20625886 | FALSE |
| Rv2152c | 455  | 133 | 1,7744403   | -0,224721482 | -1,931521 | 0,0534186 | 0,08169175  | 0,01853743 | FALSE |
| Rv2154c | 992  | 273 | 1,861439169 | -0,137722612 | -1,721994 | 0,0850706 | 0,12326174  | 0,02797046 | FALSE |
| Rv2157c | 327  | 78  | 2,067744607 | 0,068582825  | 0,4749452 | 0,634826  | 0,697036137 | 0,15817089 | FALSE |
| Rv2160c | NA   | NA  | NA          | NA           | NA        | NA        | NA          | NA         | FALSE |
| Rv2162c | 1299 | 339 | 1,938044252 | -0,06111753  | -0,863002 | 0,3881365 | 0,45997912  | 0,1043781  | FALSE |
| Rv2167c | 6    | 1   | 2,584962501 | 0,585800719  | 0,502361  | 0,6154136 | 0,680171264 | 0,15423587 | FALSE |
| Rv2168c | 19   | 4   | 2,247927513 | 0,248765732  | 0,402461  | 0,6873448 | 0,7426073   | 0,16848878 | FALSE |
| Rv2169c | 433  | 100 | 2,114367025 | 0,115205243  | 0,910697  | 0,3624551 | 0,433451417 | 0,09835845 | FALSE |
| Rv2170  | 33   | 4   | 3,044394119 | 1,045232337  | 1,9412739 | 0,0522251 | 0,080224203 | 0,01820087 | FALSE |
| Rv2172c | 563  | 166 | 1,761951681 | -0,237210101 | -2,272958 | 0,0230287 | 0,03822612  | 0,00866891 | FALSE |
| Rv2173  | 155  | 28  | 2,468769483 | 0,469607701  | 2,088583  | 0,0367453 | 0,058578562 | 0,0132926  | FALSE |
| Rv2174  | 360  | 101 | 1,833641614 | -0,165520168 | -1,252513 | 0,210383  | 0,273393965 | 0,06203834 | FALSE |
| Rv2175c | 25   | 8   | 1,64385619  | -0,355305592 | -0,732134 | 0,4640867 | 0,537313298 | 0,12190882 | FALSE |
| Rv2177c | 63   | 8   | 2,977279923 | 0,978118142  | 2,5394063 | 0,0111041 | 0,019879477 | 0,00451104 | FALSE |
| Rv2179c | 38   | 10  | 1,925999419 | -0,073162363 | -0,176997 | 0,8595107 | 0,886946652 | 0,20126523 | FALSE |
| Rv2181  | 594  | 119 | 2,319501357 | 0,320339576  | 2,8624511 | 0,0042038 | 0,008211845 | 0,00186343 | FALSE |
| Rv2182c | 766  | 176 | 2,121768963 | 0,122607181  | 1,2875697 | 0,1978958 | 0,258615327 | 0,05868479 | FALSE |
| Rv2183c | 150  | 24  | 2,64385619  | 0,644694408  | 2,7363532 | 0,0062124 | 0,01181665  | 0,00268078 | FALSE |
| Rv2186c | 207  | 51  | 2,021061616 | 0,021899834  | 0,1216408 | 0,9031835 | 0,924274967 | 0,20973574 | FALSE |
| Rv2188c | 99   | 30  | 1,722466024 | -0,276695757 | -1,119265 | 0,2630272 | 0,330112692 | 0,07489699 | FALSE |
| Rv2192c | 230  | 68  | 1,75802721  | -0,241134572 | -1,47767  | 0,139496  | 0,190568866 | 0,04324374 | FALSE |
| Rv2201  | 186  | 33  | 2,494764692 | 0,49560291   | 2,4037416 | 0,0162282 | 0,0278279   | 0,00631468 | FALSE |
| Rv2205c | 151  | 50  | 1,59454855  | -0,404613232 | -2,066694 | 0,038763  | 0,061595997 | 0,01397731 | FALSE |



|         |      |     |             |              |           |           |             |            |       |
|---------|------|-----|-------------|--------------|-----------|-----------|-------------|------------|-------|
| Rv2207  | 196  | 66  | 1,570315725 | -0,428846057 | -2,506152 | 0,0122053 | 0,021625197 | 0,00490551 | FALSE |
| Rv2208  | 100  | 26  | 1,943416472 | -0,05574531  | -0,218118 | 0,827337  | 0,861408915 | 0,19547023 | FALSE |
| Rv2211c | 349  | 69  | 2,338558769 | 0,339396988  | 2,316824  | 0,0205133 | 0,034398185 | 0,00780561 | FALSE |
| Rv2212  | 272  | 73  | 1,897638282 | -0,1015235   | -0,660393 | 0,5090017 | 0,58104279  | 0,13174386 | FALSE |
| Rv2215  | 1228 | 258 | 2,25086759  | 0,251705808  | 3,2731521 | 0,0010636 | 0,002309829 | 0,00052414 | FALSE |
| Rv2216  | 575  | 132 | 2,123024026 | 0,123862245  | 1,1266679 | 0,2598829 | 0,326946801 | 0,07419051 | FALSE |
| Rv2217  | 229  | 55  | 2,057844075 | 0,058682293  | 0,3406531 | 0,7333648 | 0,782149988 | 0,17748486 | FALSE |
| Rv2219A | 202  | 69  | 1,549687026 | -0,449474756 | -2,676163 | 0,007447  | 0,013873938 | 0,00314826 | FALSE |
| Rv2221c | 741  | 191 | 1,955900904 | -0,043260878 | -0,459865 | 0,6456134 | 0,707108967 | 0,16044942 | FALSE |
| Rv2223c | 235  | 75  | 1,647698256 | -0,351463526 | -2,219082 | 0,0264811 | 0,043499214 | 0,00987081 | FALSE |
| Rv2224c | 708  | 198 | 1,83824893  | -0,160912852 | -1,706423 | 0,0879294 | 0,126752037 | 0,02876247 | FALSE |
| Rv2225  | 170  | 33  | 2,364996817 | 0,365835035  | 1,7348917 | 0,08276   | 0,120311612 | 0,02730102 | FALSE |
| Rv2230c | 183  | 65  | 1,493332025 | -0,505829757 | -2,894679 | 0,0037955 | 0,007495903 | 0,00170096 | FALSE |
| Rv2231A | NA   | NA  | NA          | NA           | NA        | NA        | NA          | NA         | FALSE |
| Rv2231B | 25   | 3   | 3,058893689 | 1,059731907  | 1,7087995 | 0,0874881 | 0,126369903 | 0,02866001 | FALSE |
| Rv2231c | 130  | 29  | 2,164386818 | 0,165225036  | 0,7094212 | 0,4780631 | 0,550746593 | 0,12495673 | FALSE |
| Rv2232  | 84   | 25  | 1,748461233 | -0,250700549 | -0,929928 | 0,3524085 | 0,425957449 | 0,09665793 | FALSE |
| Rv2234  | 74   | 12  | 2,624490865 | 0,625329083  | 1,8704536 | 0,0614208 | 0,092459478 | 0,02097283 | FALSE |
| Rv2235  | 112  | 23  | 2,283792966 | 0,284631184  | 1,1111156 | 0,2665186 | 0,333486439 | 0,07565085 | FALSE |
| Rv2237  | 155  | 29  | 2,41814341  | 0,418981628  | 1,8798439 | 0,0601293 | 0,090757809 | 0,02059469 | FALSE |
| Rv2237A | 714  | 177 | 2,012174714 | 0,013012932  | 0,1344651 | 0,8930348 | 0,916028421 | 0,20786444 | FALSE |
| Rv2241  | 1770 | 466 | 1,9253475   | -0,073814282 | -1,219509 | 0,222651  | 0,286972414 | 0,06511955 | FALSE |
| Rv2242  | 253  | 54  | 2,228106073 | 0,228944291  | 1,3563296 | 0,1749943 | 0,2332469   | 0,05286234 | FALSE |
| Rv2249c | 32   | 7   | 2,192645078 | 0,193483296  | 0,4101445 | 0,6817    | 0,737923622 | 0,16742607 | FALSE |
| Rv2250A | 12   | 4   | 1,584962501 | -0,414199281 | -0,597378 | 0,5502552 | 0,620147636 | 0,14070331 | FALSE |
| Rv2250c | 15   | 0   | 4,906890596 | 2,907728814  | 2,6366199 | 0,0083737 | 0,015400193 | 0,00349216 | FALSE |
| Rv2251  | 101  | 22  | 2,198779864 | 0,199618082  | 0,7509747 | 0,4526679 | 0,526410769 | 0,11943511 | FALSE |
| Rv2252  | 107  | 19  | 2,493539473 | 0,494377691  | 1,8189975 | 0,0689118 | 0,102041735 | 0,02315088 | FALSE |
| Rv2255c | 67   | 9   | 2,896164189 | 0,897002407  | 2,4356041 | 0,0148669 | 0,025819123 | 0,00585886 | FALSE |
| Rv2256c | 1273 | 297 | 2,099697583 | 0,100535801  | 1,3664647 | 0,1717932 | 0,229990577 | 0,05218928 | FALSE |
| Rv2257c | 252  | 82  | 1,619727919 | -0,379433863 | -2,492891 | 0,0126708 | 0,022319586 | 0,00506474 | FALSE |
| Rv2260  | 141  | 33  | 2,095157233 | 0,095995451  | 0,4344388 | 0,6639698 | 0,723197185 | 0,16410733 | FALSE |
| Rv2261c | 12   | 8   | 0,584962501 | -1,414199281 | -2,42554  | 0,0152856 | 0,026458845 | 0,0060027  | FALSE |
| Rv2263  | 124  | 39  | 1,668794092 | -0,33036769  | -1,509608 | 0,1311435 | 0,180786434 | 0,04102391 | FALSE |
| Rv2264c | 111  | 20  | 2,472487771 | 0,47332599   | 1,7802787 | 0,0750304 | 0,110048241 | 0,02497206 | FALSE |
| Rv2265  | 33   | 2   | 4,044394119 | 2,045232337  | 3,194172  | 0,0014023 | 0,002987185 | 0,00067767 | FALSE |
| Rv2266  | 261  | 49  | 2,413196152 | 0,414034371  | 2,4126896 | 0,0158353 | 0,027272673 | 0,00618758 | FALSE |

|         |     |     |             |              |           |           |             |            |       |
|---------|-----|-----|-------------|--------------|-----------|-----------|-------------|------------|-------|
| Rv2268c | 38  | 9   | 2,078002512 | 0,07884073   | 0,1857759 | 0,8526205 | 0,881335399 | 0,19996573 | FALSE |
| Rv2269c | NA  | NA  | NA          | NA           | NA        | NA        | NA          | NA         | FALSE |
| Rv2270  | 17  | 1   | 4,087462841 | 2,088301059  | 2,3234536 | 0,0201548 | 0,033912342 | 0,00769208 | FALSE |
| Rv2272  | 71  | 32  | 1,14974712  | -0,849414662 | -3,213375 | 0,0013118 | 0,002808868 | 0,00063729 | FALSE |
| Rv2273  | 8   | 2   | 2           | 0,000838218  | 0,0009186 | 0,9992671 | 1           | 0,22680161 | FALSE |
| Rv2274A | 14  | 0   | 4,807354922 | 2,80819314   | 2,5028209 | 0,0123208 | 0,021780899 | 0,00494029 | FALSE |
| Rv2277c | 8   | 1   | 3           | 1,000838218  | 0,9222841 | 0,3563804 | 0,429901931 | 0,09741892 | FALSE |
| Rv2278  | 56  | 15  | 1,900464326 | -0,098697455 | -0,291146 | 0,7709398 | 0,814952124 | 0,18492829 | FALSE |
| Rv2279  | 25  | 5   | 2,321928095 | 0,322766313  | 0,5913521 | 0,5542845 | 0,623619523 | 0,14148932 | FALSE |
| Rv2280  | 830 | 221 | 1,909064967 | -0,090096815 | -1,021908 | 0,3068245 | 0,377218099 | 0,08559803 | FALSE |
| Rv2281  | 107 | 44  | 1,282035368 | -0,717126414 | -3,25499  | 0,001134  | 0,002450607 | 0,00055609 | FALSE |
| Rv2282c | 42  | 4   | 3,392317423 | 1,393155641  | 2,7482601 | 0,0059912 | 0,011417965 | 0,00259033 | FALSE |
| Rv2283  | 1   | 0   | NA          | NA           | NA        | NA        | NA          | NA         | FALSE |
| Rv2284  | 141 | 21  | 2,74723393  | 0,748072148  | 3,0237391 | 0,0024967 | 0,005099455 | 0,00115716 | FALSE |
| Rv2287  | 108 | 20  | 2,432959407 | 0,433797625  | 1,6204658 | 0,1051323 | 0,149151674 | 0,03383819 | FALSE |
| Rv2288  | 529 | 124 | 2,092927602 | 0,09376582   | 0,8223479 | 0,4108789 | 0,482437185 | 0,10947426 | FALSE |
| Rv2289  | 396 | 96  | 2,044394119 | 0,045232337  | 0,3461123 | 0,7292583 | 0,778823403 | 0,17672999 | FALSE |
| Rv2291  | 630 | 140 | 2,169925001 | 0,17076322   | 1,6127364 | 0,1068018 | 0,151139667 | 0,03429649 | FALSE |
| Rv2292c | 11  | 0   | 4,459431619 | 2,460269837  | 2,064437  | 0,0389763 | 0,061810432 | 0,01402034 | FALSE |
| Rv2293c | 61  | 12  | 2,345774837 | 0,346613055  | 0,9878866 | 0,3232082 | 0,394532085 | 0,08952691 | FALSE |
| Rv2296  | 264 | 55  | 2,263034406 | 0,263872624  | 1,5872442 | 0,1124573 | 0,158121842 | 0,03588088 | FALSE |
| Rv2297  | 428 | 106 | 2,013546532 | 0,01438475   | 0,1150458 | 0,9084089 | 0,928417856 | 0,21065951 | FALSE |
| Rv2298  | 286 | 64  | 2,159871337 | 0,160709555  | 1,0243295 | 0,3056797 | 0,375927874 | 0,08530526 | FALSE |
| Rv2300c | 52  | 8   | 2,700439718 | 0,701277936  | 1,7353866 | 0,0826724 | 0,120250699 | 0,02728216 | FALSE |
| Rv2301  | 115 | 38  | 1,597562538 | -0,401599244 | -1,789194 | 0,0735836 | 0,1080468   | 0,02451789 | FALSE |
| Rv2302  | 260 | 63  | 2,04508789  | 0,045926108  | 0,2847067 | 0,7758688 | 0,818845772 | 0,18581184 | FALSE |
| Rv2303c | 47  | 23  | 1,031026896 | -0,968134886 | -3,041782 | 0,0023518 | 0,004820983 | 0,00109397 | FALSE |
| Rv2305  | 80  | 22  | 1,862496476 | -0,136665306 | -0,485037 | 0,6276503 | 0,691274212 | 0,1568634  | FALSE |
| Rv2306A | 28  | 13  | 1,106915204 | -0,892246578 | -2,135466 | 0,032723  | 0,052591448 | 0,01193401 | FALSE |
| Rv2307A | 28  | 8   | 1,807354922 | -0,19180686  | -0,406591 | 0,6843086 | 0,740137953 | 0,16792849 | FALSE |
| Rv2307B | 20  | 1   | 4,321928095 | 2,322766313  | 2,6914838 | 0,0071135 | 0,013340765 | 0,00302584 | FALSE |
| Rv2308  | 30  | 3   | 3,321928095 | 1,322766313  | 2,2324089 | 0,0255879 | 0,042181344 | 0,00956576 | FALSE |
| Rv2309A | 7   | 5   | 0,485426827 | -1,513734955 | -2,017418 | 0,0436519 | 0,068413674 | 0,01551645 | FALSE |
| Rv2310  | 2   | 0   | NA          | NA           | NA        | NA        | NA          | NA         | FALSE |
| Rv2311  | 26  | 4   | 2,700439718 | 0,701277936  | 1,2270964 | 0,2197864 | 0,284022735 | 0,06441693 | FALSE |
| Rv2312  | 36  | 7   | 2,362570079 | 0,363408298  | 0,7933715 | 0,4275614 | 0,500981078 | 0,11368223 | FALSE |
| Rv2313c | 436 | 128 | 1,768184325 | -0,230977457 | -1,945496 | 0,0517153 | 0,079767311 | 0,01810074 | FALSE |

|         |      |      |             |              |           |           |             |            |       |
|---------|------|------|-------------|--------------|-----------|-----------|-------------|------------|-------|
| Rv2316  | 27   | 3    | 3,169925001 | 1,17076322   | 1,9245101 | 0,0542907 | 0,082944958 | 0,01881816 | FALSE |
| Rv2318  | 29   | 8    | 1,857980995 | -0,141180787 | -0,301911 | 0,7627199 | 0,807995469 | 0,18330046 | FALSE |
| Rv2319c | 48   | 15   | 1,678071905 | -0,321089877 | -0,911369 | 0,3621012 | 0,433290973 | 0,09832204 | FALSE |
| Rv2320c | 84   | 17   | 2,304854582 | 0,3056928    | 1,0296849 | 0,303158  | 0,373700568 | 0,08478659 | FALSE |
| Rv2321c | 28   | 6    | 2,222392421 | 0,223230639  | 0,4403642 | 0,6596734 | 0,720008781 | 0,16336122 | FALSE |
| Rv2323c | 22   | 2    | 3,459431619 | 1,460269837  | 2,0607512 | 0,0393268 | 0,062216132 | 0,01411237 | FALSE |
| Rv2324  | 16   | 5    | 1,678071905 | -0,321089877 | -0,526174 | 0,5987677 | 0,665503639 | 0,15099428 | FALSE |
| Rv2328  | 89   | 13   | 2,775293713 | 0,776131931  | 2,4803046 | 0,013127  | 0,023071729 | 0,00523542 | FALSE |
| Rv2331A | 79   | 10   | 2,981852653 | 0,982690871  | 2,854686  | 0,0043079 | 0,008390377 | 0,001903   | FALSE |
| Rv2332  | 139  | 22   | 2,659509454 | 0,660347672  | 2,6907508 | 0,0071291 | 0,013357406 | 0,00303105 | FALSE |
| Rv2334  | 345  | 66   | 2,386058432 | 0,38689665   | 2,6043605 | 0,0092046 | 0,016791351 | 0,00381028 | FALSE |
| Rv2335  | 258  | 88   | 1,551795637 | -0,447366145 | -3,009221 | 0,0026192 | 0,005341304 | 0,00120895 | FALSE |
| Rv2336  | 107  | 14   | 2,934112064 | 0,934950282  | 3,1871593 | 0,0014368 | 0,003056443 | 0,00069357 | FALSE |
| Rv2340c | 160  | 44   | 1,862496476 | -0,136665306 | -0,685962 | 0,4927371 | 0,565257427 | 0,12826777 | FALSE |
| Rv2341  | 6    | 4    | 0,584962501 | -1,414199281 | -1,715111 | 0,0863248 | 0,124941358 | 0,02835159 | FALSE |
| Rv2343c | 587  | 131  | 2,163793692 | 0,16463191   | 1,5024096 | 0,1329914 | 0,183013928 | 0,04151825 | FALSE |
| Rv2344c | 358  | 87   | 2,040872281 | 0,0417105    | 0,3036461 | 0,7613975 | 0,807028166 | 0,18313019 | FALSE |
| Rv2348c | 894  | 203  | 2,138795104 | 0,139633322  | 1,5795437 | 0,1142114 | 0,160245379 | 0,03635546 | FALSE |
| Rv2353c | 4    | 0 NA | NA          | NA           | NA        | NA        | NA          | NA         | FALSE |
| Rv2354  | 49   | 8    | 2,614709844 | 0,615548062  | 1,5007766 | 0,1334133 | 0,183402655 | 0,04161759 | FALSE |
| Rv2355  | 20   | 4    | 2,321928095 | 0,322766313  | 0,5289207 | 0,5968605 | 0,663851571 | 0,15064067 | FALSE |
| Rv2358  | 193  | 39   | 2,307054818 | 0,307893037  | 1,5714648 | 0,1160747 | 0,162570552 | 0,03687564 | FALSE |
| Rv2359  | 79   | 14   | 2,496425826 | 0,497264044  | 1,5713097 | 0,1161107 | 0,162534426 | 0,03687564 | FALSE |
| Rv2360c | 85   | 21   | 2,017073513 | 0,017911731  | 0,0637948 | 0,9491336 | 0,961320744 | 0,21814214 | FALSE |
| Rv2362c | 186  | 31   | 2,584962501 | 0,585800719  | 2,7971463 | 0,0051556 | 0,009918908 | 0,00225079 | FALSE |
| Rv2363  | 128  | 26   | 2,299560282 | 0,3003985    | 1,2502177 | 0,21122   | 0,274391242 | 0,06226464 | FALSE |
| Rv2364c | 198  | 31   | 2,67516031  | 0,675998528  | 3,278685  | 0,0010429 | 0,00227002  | 0,00051511 | FALSE |
| Rv2365c | 12   | 9    | 0,415037499 | -1,584124283 | -2,798178 | 0,0051392 | 0,009892088 | 0,0022447  | FALSE |
| Rv2366c | 433  | 103  | 2,071722688 | 0,072560906  | 0,5778491 | 0,563366  | 0,63230381  | 0,14348188 | FALSE |
| Rv2367c | 404  | 81   | 2,31836148  | 0,319199698  | 2,3526208 | 0,0186416 | 0,031609027 | 0,0071727  | FALSE |
| Rv2371  | 16   | 0    | 5           | 3,000838218  | 2,7653074 | 0,0056869 | 0,010885321 | 0,00246829 | FALSE |
| Rv2374c | 1068 | 270  | 1,983880335 | -0,015281447 | -0,194093 | 0,8461029 | 0,876551098 | 0,19890628 | FALSE |
| Rv2377c | 26   | 8    | 1,700439718 | -0,298722064 | -0,621605 | 0,5342018 | 0,603953483 | 0,13702901 | FALSE |
| Rv2379c | 206  | 37   | 2,477047162 | 0,47788538   | 2,4467548 | 0,0144149 | 0,025078218 | 0,00569073 | FALSE |
| Rv2381c | 136  | 36   | 1,91753784  | -0,081623942 | -0,37413  | 0,7083073 | 0,761604113 | 0,17275164 | FALSE |
| Rv2383c | 158  | 46   | 1,780218792 | -0,21894299  | -1,107729 | 0,2679787 | 0,335100767 | 0,0760408  | FALSE |
| Rv2384  | 44   | 13   | 1,7589919   | -0,240169881 | -0,643578 | 0,5198492 | 0,590349856 | 0,13396172 | FALSE |

|         |      |     |             |              |           |           |             |            |       |
|---------|------|-----|-------------|--------------|-----------|-----------|-------------|------------|-------|
| Rv2385  | 37   | 4   | 3,209453366 | 1,210291584  | 2,3130558 | 0,0207196 | 0,034655636 | 0,00786403 | FALSE |
| Rv2387  | 172  | 63  | 1,448984831 | -0,550176951 | -3,075908 | 0,0020986 | 0,004331234 | 0,00098284 | FALSE |
| Rv2390c | 169  | 34  | 2,313416595 | 0,314254813  | 1,4992357 | 0,1338125 | 0,183759208 | 0,04169849 | FALSE |
| Rv2395  | 439  | 84  | 2,385759707 | 0,386597925  | 2,9357639 | 0,0033273 | 0,006654549 | 0,00151005 | FALSE |
| Rv2395B | 735  | 188 | 1,967011588 | -0,032150194 | -0,339716 | 0,7340707 | 0,782479695 | 0,17755967 | FALSE |
| Rv2397c | 114  | 46  | 1,309328058 | -0,689833724 | -3,216665 | 0,0012969 | 0,002779876 | 0,00063081 | FALSE |
| Rv2398c | 106  | 32  | 1,727920455 | -0,271241327 | -1,134258 | 0,2566862 | 0,323751272 | 0,07346538 | FALSE |
| Rv2399c | 128  | 40  | 1,678071905 | -0,321089877 | -1,488297 | 0,1366726 | 0,187100525 | 0,0424567  | FALSE |
| Rv2401  | 1    | 4   | -2          | -3,999161782 | -3,098932 | 0,0019422 | 0,004037961 | 0,00091629 | FALSE |
| Rv2401A | 7    | 4   | 0,807354922 | -1,19180686  | -1,502188 | 0,1330485 | 0,182996812 | 0,04151825 | FALSE |
| Rv2402  | 414  | 76  | 2,445559444 | 0,446397662  | 3,2579723 | 0,0011221 | 0,002427656 | 0,0005507  | FALSE |
| Rv2404c | 434  | 105 | 2,047305715 | 0,048143933  | 0,3854716 | 0,6998881 | 0,753990321 | 0,17109489 | FALSE |
| Rv2406c | 403  | 115 | 1,809145978 | -0,190015804 | -1,527819 | 0,1265575 | 0,175445583 | 0,03981197 | FALSE |
| Rv2407  | 14   | 4   | 1,807354922 | -0,19180686  | -0,287502 | 0,7737281 | 0,817461446 | 0,1854977  | FALSE |
| Rv2408  | 10   | 0   | 4,321928095 | 2,322766313  | 1,903164  | 0,0570192 | 0,086593586 | 0,01963463 | FALSE |
| Rv2410c | 346  | 87  | 1,991684732 | -0,00747705  | -0,05397  | 0,9569593 | 0,968252294 | 0,21971504 | FALSE |
| Rv2413c | 162  | 46  | 1,816288047 | -0,182873735 | -0,931041 | 0,3518324 | 0,425456694 | 0,0965295  | FALSE |
| Rv2415c | 40   | 13  | 1,621488377 | -0,377673405 | -0,988213 | 0,3230483 | 0,394459021 | 0,08951033 | FALSE |
| Rv2416c | 49   | 17  | 1,527247003 | -0,471914779 | -1,389184 | 0,1647769 | 0,221726409 | 0,05031398 | FALSE |
| Rv2417c | 219  | 60  | 1,867896464 | -0,131265318 | -0,770114 | 0,4412322 | 0,515010245 | 0,11686572 | FALSE |
| Rv2418c | 341  | 69  | 2,305103472 | 0,30594169   | 2,0763737 | 0,0378594 | 0,060305929 | 0,01368457 | FALSE |
| Rv2419c | 420  | 82  | 2,356693513 | 0,357531731  | 2,6690359 | 0,0076069 | 0,014145091 | 0,00320979 | FALSE |
| Rv2422  | 1    | 0   | NA          | NA           | NA        | NA        | NA          | NA         | FALSE |
| Rv2423  | 47   | 8   | 2,554588852 | 0,55542707   | 1,3401595 | 0,1801935 | 0,238324342 | 0,05406224 | FALSE |
| Rv2424c | 55   | 8   | 2,781359714 | 0,782197932  | 1,9629657 | 0,0496502 | 0,076973366 | 0,01745987 | FALSE |
| Rv2425c | 690  | 163 | 2,081724397 | 0,082562616  | 0,8286175 | 0,4073209 | 0,47925819  | 0,10875289 | FALSE |
| Rv2426c | 303  | 65  | 2,22080617  | 0,221644389  | 1,4388266 | 0,1501997 | 0,203639545 | 0,04620972 | FALSE |
| Rv2428  | 53   | 20  | 1,40599236  | -0,593169422 | -1,85456  | 0,063659  | 0,095482482 | 0,02166269 | FALSE |
| Rv2429  | 62   | 12  | 2,36923381  | 0,370072028  | 1,0590438 | 0,2895798 | 0,358756958 | 0,08139606 | FALSE |
| Rv2432c | 49   | 9   | 2,444784843 | 0,445623061  | 1,1189487 | 0,263162  | 0,330124363 | 0,07491156 | FALSE |
| Rv2433c | 7    | 2   | 1,807354922 | -0,19180686  | -0,203294 | 0,8389052 | 0,870695283 | 0,19757749 | FALSE |
| Rv2435c | 147  | 26  | 2,499232627 | 0,500070845  | 2,1545039 | 0,0312007 | 0,050505009 | 0,01145821 | FALSE |
| Rv2436  | 46   | 12  | 1,938599455 | -0,060562327 | -0,16085  | 0,8722116 | 0,897235944 | 0,20360007 | FALSE |
| Rv2438A | NA   | NA  | NA          | NA           | NA        | NA        | NA          | NA         | FALSE |
| Rv2438c | 992  | 255 | 1,959842874 | -0,039318908 | -0,483301 | 0,6288819 | 0,692243993 | 0,15708346 | FALSE |
| Rv2443  | 210  | 36  | 2,544320516 | 0,545158734  | 2,7854976 | 0,0053446 | 0,010262393 | 0,00232873 | FALSE |
| Rv2444c | 2954 | 776 | 1,928541269 | -0,070620513 | -1,506973 | 0,1318175 | 0,18152528  | 0,04119157 | FALSE |

|         |     |     |             |              |           |           |             |            |       |
|---------|-----|-----|-------------|--------------|-----------|-----------|-------------|------------|-------|
| Rv2445c | 171 | 29  | 2,55987152  | 0,560709738  | 2,5782906 | 0,009929  | 0,017979871 | 0,00407998 | FALSE |
| Rv2446c | 234 | 44  | 2,410933101 | 0,411771319  | 2,2728785 | 0,0230335 | 0,038217974 | 0,00866891 | FALSE |
| Rv2447c | 264 | 84  | 1,652076697 | -0,347085085 | -2,320981 | 0,0202879 | 0,034107123 | 0,00773956 | FALSE |
| Rv2449c | 268 | 88  | 1,606657572 | -0,39250421  | -2,665414 | 0,0076894 | 0,014278159 | 0,00323999 | FALSE |
| Rv2450c | 28  | 3   | 3,222392421 | 1,223230639  | 2,0291217 | 0,0424459 | 0,066735748 | 0,01513457 | FALSE |
| Rv2451  | 7   | 0   | 3,807354922 | 1,80819314   | 1,355158  | 0,1753672 | 0,233310295 | 0,05286234 | FALSE |
| Rv2453c | 456 | 107 | 2,091423028 | 0,092261246  | 0,7514314 | 0,4523931 | 0,52632397  | 0,11943302 | FALSE |
| Rv2454c | 596 | 123 | 2,276654015 | 0,277492233  | 2,5022691 | 0,01234   | 0,021795338 | 0,00494578 | FALSE |
| Rv2456c | 338 | 102 | 1,728454094 | -0,270707688 | -2,021407 | 0,0432376 | 0,067831779 | 0,01539233 | FALSE |
| Rv2458  | 44  | 11  | 2           | 0,000838218  | 0,0021543 | 0,9982811 | 1           | 0,22680161 | FALSE |
| Rv2461c | 756 | 224 | 1,754887502 | -0,24427428  | -2,715819 | 0,0066112 | 0,012493831 | 0,00283509 | FALSE |
| Rv2463  | 919 | 271 | 1,76177201  | -0,237389772 | -2,906603 | 0,0036538 | 0,007234171 | 0,00164157 | FALSE |
| Rv2465c | 93  | 25  | 1,895302621 | -0,103859161 | -0,395176 | 0,6927132 | 0,747485898 | 0,16959556 | FALSE |
| Rv2468A | 165 | 37  | 2,156868849 | 0,157707067  | 0,7638705 | 0,4449444 | 0,519036021 | 0,11777924 | FALSE |
| Rv2468c | 370 | 113 | 1,711202498 | -0,287959284 | -2,256472 | 0,0240411 | 0,039822813 | 0,00903656 | FALSE |
| Rv2471  | 246 | 82  | 1,584962501 | -0,414199281 | -2,704953 | 0,0068314 | 0,012860649 | 0,00291833 | FALSE |
| Rv2474c | 143 | 32  | 2,159871337 | 0,160709555  | 0,7242821 | 0,4688926 | 0,541843626 | 0,12295473 | FALSE |
| Rv2475c | 480 | 109 | 2,138706271 | 0,139544489  | 1,1565501 | 0,2474562 | 0,314523781 | 0,07137149 | FALSE |
| Rv2478c | 164 | 25  | 2,713695815 | 0,714534033  | 3,1330154 | 0,0017302 | 0,003631679 | 0,0008241  | FALSE |
| Rv2479c | 11  | 0   | 4,459431619 | 2,460269837  | 2,064437  | 0,0389763 | 0,061810432 | 0,01402034 | FALSE |
| Rv2481c | 16  | 0   | 5           | 3,000838218  | 2,7653074 | 0,0056869 | 0,010885321 | 0,00246829 | FALSE |
| Rv2483c | 639 | 192 | 1,73470962  | -0,264452162 | -2,712457 | 0,0066786 | 0,012615213 | 0,00286263 | FALSE |
| Rv2484c | 430 | 125 | 1,782408565 | -0,216753217 | -1,808614 | 0,0705111 | 0,104155665 | 0,02363492 | FALSE |
| Rv2488c | 150 | 36  | 2,058893689 | 0,059731907  | 0,2805762 | 0,7790355 | 0,821528319 | 0,18635388 | FALSE |
| Rv2489c | 19  | 0   | 5,247927513 | 3,248765732  | 3,1251991 | 0,0017768 | 0,00372166  | 0,00084407 | FALSE |
| Rv2490c | 97  | 19  | 2,351985329 | 0,352823547  | 1,2667102 | 0,2052589 | 0,267528508 | 0,06070736 | FALSE |
| Rv2491  | 11  | 9   | 0,289506617 | -1,709655165 | -2,954932 | 0,0031274 | 0,006289852 | 0,00142701 | FALSE |
| Rv2492  | 44  | 5   | 3,137503524 | 1,138341742  | 2,4022028 | 0,0162967 | 0,027896733 | 0,0063303  | FALSE |
| Rv2493  | 42  | 10  | 2,070389328 | 0,071227546  | 0,1766823 | 0,8597579 | 0,886969741 | 0,20127047 | FALSE |
| Rv2494  | 53  | 13  | 2,027480736 | 0,028318955  | 0,0794998 | 0,9366351 | 0,950614693 | 0,21571273 | FALSE |
| Rv2495c | 499 | 141 | 1,823344653 | -0,175817129 | -1,569224 | 0,1165956 | 0,163126368 | 0,03701651 | FALSE |
| Rv2502c | 482 | 98  | 2,298179492 | 0,29901771   | 2,4157232 | 0,015704  | 0,027082007 | 0,00614543 | FALSE |
| Rv2506  | 85  | 11  | 2,949959318 | 0,950797536  | 2,880887  | 0,0039656 | 0,007787025 | 0,00176659 | FALSE |
| Rv2508c | 180 | 28  | 2,684498174 | 0,685336392  | 3,1641481 | 0,0015554 | 0,003298066 | 0,00074839 | FALSE |
| Rv2509  | 249 | 59  | 2,077358883 | 0,078197101  | 0,4717495 | 0,6371056 | 0,698955366 | 0,1586064  | FALSE |
| Rv2511  | 126 | 23  | 2,453717967 | 0,454556186  | 1,8274826 | 0,0676272 | 0,100516985 | 0,02280006 | FALSE |
| Rv2512c | 9   | 0   | 4,169925001 | 2,17076322   | 1,7323823 | 0,0832055 | 0,12075899  | 0,02738742 | FALSE |

|         |      |      |             |              |           |           |             |            |       |
|---------|------|------|-------------|--------------|-----------|-----------|-------------|------------|-------|
| Rv2515c | 94   | 17   | 2,46712601  | 0,467964229  | 1,6212294 | 0,1049684 | 0,14899966  | 0,0338048  | FALSE |
| Rv2516c | 247  | 46   | 2,424805276 | 0,425643494  | 2,4080416 | 0,0160384 | 0,027550205 | 0,00624901 | FALSE |
| Rv2517c | 365  | 106  | 1,783832199 | -0,215329583 | -1,654932 | 0,0979383 | 0,139547859 | 0,03166609 | FALSE |
| Rv2523c | 127  | 39   | 1,703282468 | -0,295879314 | -1,360119 | 0,1737923 | 0,232036795 | 0,05265361 | FALSE |
| Rv2526  | 8    | 0    | 4           | 2,000838218  | 1,5504405 | 0,1210358 | 0,168501698 | 0,03819582 | FALSE |
| Rv2528c | 8    | 3    | 1,415037499 | -0,584124283 | -0,708414 | 0,4786884 | 0,551144976 | 0,12504713 | FALSE |
| Rv2529  | 9    | 3    | 1,584962501 | -0,414199281 | -0,517344 | 0,6049162 | 0,671013799 | 0,15224451 | FALSE |
| Rv2531c | 586  | 146  | 2,004932296 | 0,005770514  | 0,0540851 | 0,9568673 | 0,968407695 | 0,21971504 | FALSE |
| Rv2535c | 242  | 70   | 1,78958022  | -0,209581562 | -1,310212 | 0,1901241 | 0,249783293 | 0,05668063 | FALSE |
| Rv2536  | 1050 | 246  | 2,093659107 | 0,094497325  | 1,1676304 | 0,2429559 | 0,310002608 | 0,07034555 | FALSE |
| Rv2537c | 128  | 36   | 1,830074999 | -0,169086783 | -0,763365 | 0,4452456 | 0,519233783 | 0,11782412 | FALSE |
| Rv2538c | 289  | 64   | 2,174925683 | 0,175763901  | 1,1232095 | 0,2613485 | 0,328476279 | 0,07453758 | FALSE |
| Rv2539c | 69   | 18   | 1,938599455 | -0,060562327 | -0,197001 | 0,8438264 | 0,874882066 | 0,19852755 | FALSE |
| Rv2541  | 54   | 17   | 1,667424661 | -0,331737121 | -1,000553 | 0,3170431 | 0,387967148 | 0,0880372  | FALSE |
| Rv2543  | 7    | 4    | 0,807354922 | -1,19180686  | -1,502188 | 0,1330485 | 0,182996812 | 0,04151825 | FALSE |
| Rv2544  | 4    | 0    | NA          | NA           | NA        | NA        | NA          | NA         | FALSE |
| Rv2545  | 1    | 1    | 0           | -1,999161782 | -1,095408 | 0,273338  | 0,341207532 | 0,07737244 | FALSE |
| Rv2546  | 8    | 2    | 2           | 0,000838218  | 0,0009186 | 0,9992671 | 1           | 0,22680161 | FALSE |
| Rv2547  | 40   | 4    | 3,321928095 | 1,322766313  | 2,5777685 | 0,0099441 | 0,017994664 | 0,00408106 | FALSE |
| Rv2550c | 149  | 51   | 1,546743178 | -0,452418603 | -2,314616 | 0,0206339 | 0,034578405 | 0,00784484 | FALSE |
| Rv2552c | 223  | 58   | 1,942918905 | -0,056242877 | -0,328668 | 0,742407  | 0,790297755 | 0,17933374 | FALSE |
| Rv2554c | 162  | 52   | 1,639410285 | -0,359751497 | -1,888569 | 0,0589496 | 0,089250447 | 0,02025264 | FALSE |
| Rv2555c | 4130 | 1077 | 1,939123532 | -0,06003825  | -1,512604 | 0,1303804 | 0,179797248 | 0,04079945 | FALSE |
| Rv2559c | 72   | 11   | 2,710493383 | 0,711331601  | 2,0677025 | 0,038668  | 0,061469811 | 0,01394868 | FALSE |
| Rv2562  | 57   | 8    | 2,832890014 | 0,833728232  | 2,1110508 | 0,0347679 | 0,055617431 | 0,0126181  | FALSE |
| Rv2563  | 157  | 51   | 1,622195407 | -0,376966375 | -1,95398  | 0,0507036 | 0,078298751 | 0,01776749 | FALSE |
| Rv2565  | 235  | 79   | 1,572736198 | -0,426425583 | -2,727588 | 0,0063799 | 0,012085714 | 0,00274248 | FALSE |
| Rv2567  | 566  | 117  | 2,274293523 | 0,275131741  | 2,418707  | 0,0155758 | 0,026896182 | 0,00610326 | FALSE |
| Rv2569c | 144  | 36   | 2           | 0,000838218  | 0,0038973 | 0,9968904 | 1           | 0,22680161 | FALSE |
| Rv2570  | 9    | 0    | 4,169925001 | 2,17076322   | 1,7323823 | 0,0832055 | 0,12075899  | 0,02738742 | FALSE |
| Rv2571c | 160  | 43   | 1,89566334  | -0,103498442 | -0,516511 | 0,6054978 | 0,671375682 | 0,15234804 | FALSE |
| Rv2572c | 391  | 82   | 2,253472793 | 0,254311011  | 1,8648127 | 0,0622077 | 0,093429932 | 0,02120105 | FALSE |
| Rv2573  | 5    | 2    | 1,321928095 | -0,677233687 | -0,659883 | 0,5093289 | 0,580911835 | 0,13174386 | FALSE |
| Rv2575  | 269  | 52   | 2,371022644 | 0,371860863  | 2,2160348 | 0,0266891 | 0,043767931 | 0,00993178 | FALSE |
| Rv2577  | 35   | 3    | 3,544320516 | 1,545158734  | 2,7101955 | 0,0067244 | 0,012674247 | 0,00287534 | FALSE |
| Rv2578c | 28   | 8    | 1,807354922 | -0,19180686  | -0,406591 | 0,6843086 | 0,740137953 | 0,16792849 | FALSE |
| Rv2579  | 219  | 55   | 1,993427346 | -0,005734436 | -0,032919 | 0,9737391 | 0,982206427 | 0,22288151 | FALSE |

|         |      |      |             |              |           |           |             |            |       |
|---------|------|------|-------------|--------------|-----------|-----------|-------------|------------|-------|
| Rv2580c | 617  | 133  | 2,213844244 | 0,214682462  | 1,9912695 | 0,0464513 | 0,072412566 | 0,0164318  | FALSE |
| Rv2583c | 2165 | 533  | 2,022159587 | 0,022997805  | 0,4132654 | 0,6794121 | 0,736761477 | 0,16715256 | FALSE |
| Rv2586c | 936  | 202  | 2,212153237 | 0,212991455  | 2,4341951 | 0,0149249 | 0,025908451 | 0,00587913 | FALSE |
| Rv2587c | 1320 | 295  | 2,16175107  | 0,162589288  | 2,2262537 | 0,0259972 | 0,042757686 | 0,00970254 | FALSE |
| Rv2589  | 328  | 91   | 1,849757364 | -0,149404417 | -1,076126 | 0,281871  | 0,350362132 | 0,0795039  | FALSE |
| Rv2594c | 603  | 121  | 2,317150955 | 0,317989173  | 2,8640671 | 0,0041824 | 0,008174114 | 0,00185486 | FALSE |
| Rv2596  | 67   | 15   | 2,159198595 | 0,160036813  | 0,4937385 | 0,6214909 | 0,685160053 | 0,15545425 | FALSE |
| Rv2597  | 112  | 16   | 2,807354922 | 0,80819314   | 2,881296  | 0,0039604 | 0,007782739 | 0,00176605 | FALSE |
| Rv2598  | 20   | 6    | 1,736965594 | -0,262196188 | -0,475502 | 0,6344294 | 0,696794685 | 0,1581161  | FALSE |
| Rv2601  | 61   | 9    | 2,760812336 | 0,761650554  | 2,020144  | 0,0433684 | 0,068010006 | 0,01543278 | FALSE |
| Rv2601A | 89   | 12   | 2,89077093  | 0,891609148  | 2,7928855 | 0,005224  | 0,010040706 | 0,00227843 | FALSE |
| Rv2605c | 466  | 124  | 1,909989834 | -0,089171948 | -0,757649 | 0,4486613 | 0,522444687 | 0,11855274 | FALSE |
| Rv2607  | 55   | 7    | 2,974004791 | 0,97484301   | 2,3660962 | 0,0179768 | 0,030586882 | 0,00694075 | FALSE |
| Rv2609c | 350  | 82   | 2,093659107 | 0,094497325  | 0,6740001 | 0,5003112 | 0,572447772 | 0,1298994  | FALSE |
| Rv2610c | 362  | 106  | 1,771925433 | -0,227236349 | -1,742842 | 0,0813612 | 0,118452788 | 0,02687921 | FALSE |
| Rv2611c | 164  | 39   | 2,072149786 | 0,072988004  | 0,3576648 | 0,7205942 | 0,771031843 | 0,17496194 | FALSE |
| Rv2612c | 224  | 74   | 1,597901556 | -0,401260225 | -2,494916 | 0,0125987 | 0,022212471 | 0,00504044 | FALSE |
| Rv2614A | 2    | 0 NA | NA          | NA           | NA        | NA        | NA          | NA         | FALSE |
| Rv2615c | 127  | 32   | 1,988684687 | -0,010477095 | -0,045838 | 0,9634396 | 0,97380979  | 0,22097615 | FALSE |
| Rv2617c | 82   | 14   | 2,550197083 | 0,551035301  | 1,7575229 | 0,0788287 | 0,115020524 | 0,02610037 | FALSE |
| Rv2618  | 10   | 8    | 0,321928095 | -1,677233687 | -2,748501 | 0,0059868 | 0,011417844 | 0,00259033 | FALSE |
| Rv2620c | 69   | 16   | 2,108524457 | 0,109362675  | 0,3454199 | 0,7297787 | 0,779168199 | 0,17680823 | FALSE |
| Rv2621c | 116  | 21   | 2,465663572 | 0,46650179   | 1,7958192 | 0,0725233 | 0,106668586 | 0,02420064 | FALSE |
| Rv2622  | 27   | 7    | 1,94753258  | -0,051629202 | -0,104892 | 0,9164616 | 0,935193924 | 0,21221347 | FALSE |
| Rv2626c | 629  | 176  | 1,837484588 | -0,161677194 | -1,61622  | 0,1060468 | 0,150232947 | 0,03409074 | FALSE |
| Rv2629  | 1023 | 279  | 1,874469118 | -0,124692664 | -1,579691 | 0,1141777 | 0,160255046 | 0,03635546 | FALSE |
| Rv2630  | 147  | 24   | 2,614709844 | 0,615548062  | 2,5994807 | 0,0093365 | 0,017008374 | 0,00385953 | FALSE |
| Rv2635  | 1    | 0 NA | NA          | NA           | NA        | NA        | NA          | NA         | FALSE |
| Rv2636  | 53   | 21   | 1,335603032 | -0,66355875  | -2,100096 | 0,0357204 | 0,057036946 | 0,01294278 | FALSE |
| Rv2637  | 103  | 34   | 1,599037686 | -0,400124096 | -1,686616 | 0,0916772 | 0,131577538 | 0,02985747 | FALSE |
| Rv2638  | 74   | 19   | 1,961525852 | -0,03763593  | -0,12628  | 0,89951   | 0,92195096  | 0,20920151 | FALSE |
| Rv2640c | 54   | 26   | 1,054447784 | -0,944713998 | -3,168685 | 0,0015313 | 0,003250511 | 0,0007376  | FALSE |
| Rv2642  | 47   | 6    | 2,969626351 | 0,970464569  | 2,1790831 | 0,0293255 | 0,047714423 | 0,01082732 | FALSE |
| Rv2643  | 123  | 19   | 2,694586992 | 0,69542521   | 2,6494445 | 0,0080624 | 0,014907731 | 0,00338285 | FALSE |
| Rv2644c | 2    | 0 NA | NA          | NA           | NA        | NA        | NA          | NA         | FALSE |
| Rv2645  | 29   | 10   | 1,5360529   | -0,463108882 | -1,047163 | 0,2950242 | 0,364871545 | 0,08279636 | FALSE |
| Rv2646  | 68   | 10   | 2,765534746 | 0,766372964  | 2,144379  | 0,0320025 | 0,051644016 | 0,01171902 | FALSE |

|         |      |     |             |              |           |           |             |            |       |
|---------|------|-----|-------------|--------------|-----------|-----------|-------------|------------|-------|
| Rv2647  | 16   | 7   | 1,192645078 | -0,806516704 | -1,437633 | 0,1505381 | 0,20399323  | 0,04628203 | FALSE |
| Rv2648  | 51   | 14  | 1,86507042  | -0,134091362 | -0,379804 | 0,7040908 | 0,757896897 | 0,17198136 | FALSE |
| Rv2649  | 28   | 3   | 3,222392421 | 1,223230639  | 2,0291217 | 0,0424459 | 0,066735748 | 0,01513457 | FALSE |
| Rv2650c | 99   | 33  | 1,584962501 | -0,414199281 | -1,715886 | 0,0861828 | 0,124781597 | 0,02831534 | FALSE |
| Rv2651c | 108  | 30  | 1,847996907 | -0,151164875 | -0,624927 | 0,5320192 | 0,601744732 | 0,13654744 | FALSE |
| Rv2652c | 11   | 2   | 2,459431619 | 0,460269837  | 0,5461941 | 0,5849325 | 0,652240298 | 0,14796402 | FALSE |
| Rv2653c | 1    | 0   | NA          | NA           | NA        | NA        | NA          | NA         | FALSE |
| Rv2654c | NA   | NA  | NA          | NA           | NA        | NA        | NA          | NA         | FALSE |
| Rv2655c | 32   | 2   | 4           | 2,000838218  | 3,1008917 | 0,0019294 | 0,004013454 | 0,00091073 | FALSE |
| Rv2656c | 6    | 0   | 3,584962501 | 1,585800719  | 1,1435548 | 0,2528083 | 0,319883217 | 0,07249462 | FALSE |
| Rv2657c | 69   | 19  | 1,860596943 | -0,138564839 | -0,456868 | 0,6477662 | 0,708777873 | 0,16081301 | FALSE |
| Rv2658c | 12   | 0   | 4,584962501 | 2,585800719  | 2,2174871 | 0,0265898 | 0,043641391 | 0,00989895 | FALSE |
| Rv2659c | 61   | 8   | 2,930737338 | 0,931575556  | 2,3991433 | 0,0164335 | 0,028106527 | 0,00637791 | FALSE |
| Rv2660c | NA   | NA  | NA          | NA           | NA        | NA        | NA          | NA         | FALSE |
| Rv2661c | 27   | 2   | 3,754887502 | 1,75572572   | 2,6078618 | 0,009111  | 0,016643667 | 0,00377327 | FALSE |
| Rv2662  | 11   | 0   | 4,459431619 | 2,460269837  | 2,064437  | 0,0389763 | 0,061810432 | 0,01402034 | FALSE |
| Rv2663  | 21   | 1   | 4,392317423 | 2,393155641  | 2,8070784 | 0,0049993 | 0,009653498 | 0,00219003 | FALSE |
| Rv2664  | 23   | 9   | 1,353636955 | -0,645524827 | -1,341642 | 0,179712  | 0,238046707 | 0,05399017 | FALSE |
| Rv2665  | 98   | 32  | 1,614709844 | -0,384451938 | -1,576441 | 0,1149242 | 0,161016392 | 0,03653771 | FALSE |
| Rv2667  | 20   | 2   | 3,321928095 | 1,322766313  | 1,8227509 | 0,0683411 | 0,101329842 | 0,02298505 | FALSE |
| Rv2671  | 91   | 19  | 2,259867127 | 0,260705345  | 0,9211635 | 0,3569651 | 0,42988406  | 0,09752015 | FALSE |
| Rv2672  | 308  | 96  | 1,68182404  | -0,317337742 | -2,280331 | 0,0225881 | 0,03760548  | 0,00853341 | FALSE |
| Rv2675c | 330  | 75  | 2,137503524 | 0,138341742  | 0,9508544 | 0,3416783 | 0,41489508  | 0,09414766 | FALSE |
| Rv2676c | 387  | 81  | 2,256339753 | 0,257177971  | 1,8752305 | 0,060761  | 0,091641084 | 0,02079512 | FALSE |
| Rv2677c | 155  | 47  | 1,721535554 | -0,277626228 | -1,405455 | 0,1598861 | 0,215586603 | 0,04890534 | FALSE |
| Rv2679  | 108  | 24  | 2,169925001 | 0,17076322   | 0,6676417 | 0,5043623 | 0,576414108 | 0,13079943 | FALSE |
| Rv2680  | 254  | 57  | 2,155794673 | 0,156632891  | 0,9414946 | 0,3464515 | 0,419786352 | 0,09525759 | FALSE |
| Rv2682c | 1352 | 374 | 1,853984976 | -0,145176805 | -2,122095 | 0,0338298 | 0,054171561 | 0,01229257 | FALSE |
| Rv2683  | 113  | 29  | 1,962197967 | -0,036963815 | -0,153246 | 0,8782046 | 0,902459388 | 0,20478537 | FALSE |
| Rv2684  | 252  | 57  | 2,144389909 | 0,145228127  | 0,8712187 | 0,3836348 | 0,455876911 | 0,10344723 | FALSE |
| Rv2685  | 225  | 62  | 1,859584881 | -0,139576901 | -0,831217 | 0,4058512 | 0,478099517 | 0,10842639 | FALSE |
| Rv2686c | 43   | 13  | 1,725825037 | -0,273336745 | -0,728257 | 0,4664564 | 0,539740122 | 0,12245944 | FALSE |
| Rv2688c | 102  | 31  | 1,718229032 | -0,28093275  | -1,154342 | 0,24836   | 0,315469131 | 0,07158601 | FALSE |
| Rv2689c | 115  | 26  | 2,145050333 | 0,145888551  | 0,5911263 | 0,5544358 | 0,623522867 | 0,14148932 | FALSE |
| Rv2690c | 256  | 47  | 2,445411148 | 0,446249366  | 2,5610445 | 0,0104358 | 0,018751157 | 0,004255   | FALSE |
| Rv2692  | 295  | 77  | 1,937784604 | -0,061377178 | -0,412905 | 0,679676  | 0,736642547 | 0,16715256 | FALSE |
| Rv2693c | 134  | 22  | 2,606657572 | 0,60749579   | 2,4528238 | 0,014174  | 0,024702678 | 0,00560551 | FALSE |



|         |      |      |              |              |           |           |             |            |       |
|---------|------|------|--------------|--------------|-----------|-----------|-------------|------------|-------|
| Rv2695  | 29   | 4    | 2,857980995  | 0,858819213  | 1,544353  | 0,1225028 | 0,170183594 | 0,03860433 | FALSE |
| Rv2697c | 336  | 82   | 2,034765418  | 0,035603636  | 0,2513632 | 0,8015333 | 0,840310276 | 0,19068254 | FALSE |
| Rv2700  | 48   | 10   | 2,263034406  | 0,263872624  | 0,6767648 | 0,4985552 | 0,571516272 | 0,12966918 | FALSE |
| Rv2701c | 116  | 24   | 2,273018494  | 0,273856713  | 1,0900126 | 0,2757076 | 0,343404624 | 0,0779128  | FALSE |
| Rv2702  | 257  | 76   | 1,757697036  | -0,241464746 | -1,564239 | 0,1177616 | 0,164640752 | 0,03736015 | FALSE |
| Rv2705c | 33   | 12   | 1,459431619  | -0,539730163 | -1,319268 | 0,1870795 | 0,245947144 | 0,05581013 | FALSE |
| Rv2706c | 2    | 5    | -1,321928095 | -3,321089877 | -3,236004 | 0,0012122 | 0,002603893 | 0,00059087 | FALSE |
| Rv2708c | 243  | 81   | 1,584962501  | -0,414199281 | -2,688406 | 0,0071794 | 0,013432429 | 0,00304808 | FALSE |
| Rv2715  | 331  | 64   | 2,370687407  | 0,371525625  | 2,4561495 | 0,0140435 | 0,024529432 | 0,0055662  | FALSE |
| Rv2716  | 182  | 54   | 1,752907138  | -0,246254644 | -1,343548 | 0,1790946 | 0,237468241 | 0,05387705 | FALSE |
| Rv2717c | 101  | 39   | 1,372809264  | -0,626352518 | -2,718996 | 0,006548  | 0,012380361 | 0,00280934 | FALSE |
| Rv2718c | 188  | 66   | 1,510194732  | -0,48896705  | -2,827877 | 0,0046858 | 0,009090367 | 0,00206278 | FALSE |
| Rv2719c | 74   | 16   | 2,209453366  | 0,210291584  | 0,6759212 | 0,4990907 | 0,571631684 | 0,12969538 | FALSE |
| Rv2723  | 147  | 26   | 2,499232627  | 0,500070845  | 2,1545039 | 0,0312007 | 0,050505009 | 0,01145821 | FALSE |
| Rv2724c | 290  | 71   | 2,030161971  | 0,031000189  | 0,2034895 | 0,8387525 | 0,87076593  | 0,19757749 | FALSE |
| Rv2727c | 71   | 16   | 2,14974712   | 0,150585338  | 0,4790307 | 0,6319168 | 0,695002756 | 0,15766436 | FALSE |
| Rv2729c | 403  | 122  | 1,723898691  | -0,275263091 | -2,246194 | 0,0246916 | 0,040831689 | 0,00926442 | FALSE |
| Rv2732c | 341  | 102  | 1,741202587  | -0,257959195 | -1,930474 | 0,0535482 | 0,081858107 | 0,01857518 | FALSE |
| Rv2734  | 77   | 22   | 1,807354922  | -0,19180686  | -0,674265 | 0,5001431 | 0,572421424 | 0,12989342 | FALSE |
| Rv2736c | 127  | 22   | 2,529253068  | 0,530091286  | 2,1117773 | 0,0347056 | 0,055551429 | 0,01260569 | FALSE |
| Rv2737A | 3    | 0 NA | NA           | NA           | NA        | NA        | NA          | NA         | FALSE |
| Rv2737c | 1401 | 318  | 2,139358285  | 0,140196503  | 1,9854004 | 0,0470999 | 0,073336821 | 0,01664153 | FALSE |
| Rv2738c | 46   | 8    | 2,523561956  | 0,524400174  | 1,2585115 | 0,2082068 | 0,270878334 | 0,06145736 | FALSE |
| Rv2739c | 119  | 45   | 1,402964667  | -0,596197115 | -2,794639 | 0,0051958 | 0,00999129  | 0,00226722 | FALSE |
| Rv2740  | 74   | 29   | 1,351472371  | -0,647689411 | -2,415536 | 0,0157121 | 0,027084123 | 0,00614591 | FALSE |
| Rv2742c | 51   | 8    | 2,672425342  | 0,67326356   | 1,6579935 | 0,0973188 | 0,138815642 | 0,03149994 | FALSE |
| Rv2744c | 1245 | 332  | 1,906890596  | -0,092271186 | -1,282423 | 0,1996942 | 0,26070632  | 0,05915927 | FALSE |
| Rv2749  | 74   | 12   | 2,624490865  | 0,625329083  | 1,8704536 | 0,0614208 | 0,092459478 | 0,02097283 | FALSE |
| Rv2751  | 370  | 68   | 2,443918619  | 0,444756837  | 3,0694997 | 0,0021442 | 0,004422925 | 0,00100365 | FALSE |
| Rv2754c | 39   | 5    | 2,963474124  | 0,964312342  | 1,9745016 | 0,0483247 | 0,075066067 | 0,01702723 | FALSE |
| Rv2755c | 44   | 6    | 2,874469118  | 0,875307336  | 1,9332732 | 0,0532025 | 0,081424464 | 0,01847677 | FALSE |
| Rv2756c | 341  | 86   | 1,987363174  | -0,011798608 | -0,084609 | 0,9325726 | 0,947222827 | 0,21494305 | FALSE |
| Rv2758c | 22   | 2    | 3,459431619  | 1,460269837  | 2,0607512 | 0,0393268 | 0,062216132 | 0,01411237 | FALSE |
| Rv2759c | 33   | 6    | 2,459431619  | 0,460269837  | 0,946041  | 0,3441277 | 0,417419515 | 0,09470594 | FALSE |
| Rv2760c | 27   | 2    | 3,754887502  | 1,75572572   | 2,6078618 | 0,009111  | 0,016643667 | 0,00377327 | FALSE |
| Rv2761c | 111  | 37   | 1,584962501  | -0,414199281 | -1,816913 | 0,0692304 | 0,102455814 | 0,02324919 | FALSE |
| Rv2763c | 362  | 111  | 1,705430021  | -0,293731761 | -2,278959 | 0,0226695 | 0,037725089 | 0,00856055 | FALSE |

|         |     |     |             |              |           |           |             |            |       |
|---------|-----|-----|-------------|--------------|-----------|-----------|-------------|------------|-------|
| Rv2765  | 106 | 20  | 2,40599236  | 0,406830578  | 1,5126439 | 0,1303701 | 0,179877503 | 0,04079945 | FALSE |
| Rv2766c | 43  | 5   | 3,10433666  | 1,105174878  | 2,318846  | 0,0204034 | 0,034264831 | 0,00777339 | FALSE |
| Rv2767c | 13  | 1   | 3,700439718 | 1,701277936  | 1,7700667 | 0,076716  | 0,112228491 | 0,02544792 | FALSE |
| Rv2768c | 66  | 17  | 1,956931278 | -0,042230504 | -0,133925 | 0,8934622 | 0,916228495 | 0,20790985 | FALSE |
| Rv2769c | 23  | 9   | 1,353636955 | -0,645524827 | -1,341642 | 0,179712  | 0,238046707 | 0,05399017 | FALSE |
| Rv2771c | 167 | 39  | 2,098302074 | 0,099140292  | 0,4880263 | 0,6255312 | 0,689132671 | 0,15637744 | FALSE |
| Rv2772c | 185 | 64  | 1,531381461 | -0,467780321 | -2,673836 | 0,0074989 | 0,013957402 | 0,0031672  | FALSE |
| Rv2773c | 314 | 93  | 1,755461938 | -0,243699844 | -1,745737 | 0,0808567 | 0,117805252 | 0,02672336 | FALSE |
| Rv2774c | 37  | 5   | 2,887525271 | 0,888363489  | 1,7952075 | 0,0726206 | 0,106752072 | 0,0242241  | FALSE |
| Rv2775  | 80  | 9   | 3,152003093 | 1,152841312  | 3,2721785 | 0,0010672 | 0,002315249 | 0,00052537 | FALSE |
| Rv2776c | 91  | 20  | 2,185866545 | 0,186704763  | 0,6682078 | 0,504001  | 0,576168051 | 0,1307436  | FALSE |
| Rv2777c | 289 | 54  | 2,42003818  | 0,420876398  | 2,5777236 | 0,0099454 | 0,017984626 | 0,00408106 | FALSE |
| Rv2780  | 624 | 178 | 1,809668788 | -0,189492994 | -1,895856 | 0,0579791 | 0,087916051 | 0,01994984 | FALSE |
| Rv2786c | 197 | 34  | 2,534588978 | 0,535427196  | 2,6542071 | 0,0079495 | 0,014712734 | 0,0033386  | FALSE |
| Rv2787  | 127 | 29  | 2,130703692 | 0,13154191   | 0,5615098 | 0,57445   | 0,643005784 | 0,1458522  | FALSE |
| Rv2790c | 455 | 143 | 1,669851398 | -0,329310384 | -2,882264 | 0,0039483 | 0,007766615 | 0,00176239 | FALSE |
| Rv2796c | 108 | 31  | 1,800691192 | -0,19847059  | -0,827246 | 0,4080977 | 0,479885911 | 0,1088817  | FALSE |
| Rv2797c | 152 | 51  | 1,575502171 | -0,42365961  | -2,178312 | 0,0293828 | 0,047787931 | 0,01084048 | FALSE |
| Rv2798c | 253 | 62  | 2,028797264 | 0,029635482  | 0,1817394 | 0,8557873 | 0,884029597 | 0,2006033  | FALSE |
| Rv2800  | 158 | 41  | 1,946228744 | -0,052933038 | -0,260216 | 0,7946968 | 0,834029835 | 0,18925739 | FALSE |
| Rv2801c | 24  | 1   | 4,584962501 | 2,585800719  | 3,1360048 | 0,0017127 | 0,003599652 | 0,00081661 | FALSE |
| Rv2802c | 68  | 23  | 1,563900885 | -0,435260897 | -1,499845 | 0,1336546 | 0,183638272 | 0,04166379 | FALSE |
| Rv2804c | 3   | 1   | 1,584962501 | -0,414199281 | -0,298688 | 0,7651781 | 0,809729704 | 0,18369394 | FALSE |
| Rv2805  | 73  | 24  | 1,604862058 | -0,394299724 | -1,39781  | 0,1621702 | 0,218367767 | 0,04954951 | FALSE |
| Rv2806  | 6   | 0   | 3,584962501 | 1,585800719  | 1,1435548 | 0,2528083 | 0,319883217 | 0,07249462 | FALSE |
| Rv2807  | NA  | NA  | NA          | NA           | NA        | NA        | NA          | NA         | FALSE |
| Rv2810c | 12  | 2   | 2,584962501 | 0,585800719  | 0,7104468 | 0,4774271 | 0,550415821 | 0,12486342 | FALSE |
| Rv2811  | 6   | 3   | 1           | -0,999161782 | -1,127672 | 0,2594587 | 0,326621426 | 0,07409303 | FALSE |
| Rv2812  | 11  | 3   | 1,874469118 | -0,124692664 | -0,163756 | 0,8699229 | 0,895699199 | 0,20322483 | FALSE |
| Rv2813  | 1   | 0   | NA          | NA           | NA        | NA        | NA          | NA         | FALSE |
| Rv2814c | 12  | 3   | 2           | 0,000838218  | 0,001125  | 0,9991024 | 1           | 0,22680161 | FALSE |
| Rv2815c | 22  | 2   | 3,459431619 | 1,460269837  | 2,0607512 | 0,0393268 | 0,062216132 | 0,01411237 | FALSE |
| Rv2817c | 24  | 9   | 1,415037499 | -0,584124283 | -1,227015 | 0,2198168 | 0,283876073 | 0,06441693 | FALSE |
| Rv2818c | 107 | 28  | 1,934112064 | -0,065049718 | -0,263707 | 0,7920055 | 0,831426542 | 0,18866665 | FALSE |
| Rv2819c | 142 | 53  | 1,421826665 | -0,577335117 | -2,946581 | 0,0032131 | 0,006452346 | 0,00146416 | FALSE |
| Rv2820c | 49  | 21  | 1,222392421 | -0,776769361 | -2,410636 | 0,0159247 | 0,027390843 | 0,00621551 | FALSE |
| Rv2821c | 34  | 16  | 1,087462841 | -0,911698941 | -2,412596 | 0,0158394 | 0,027267756 | 0,00618758 | FALSE |

|         |      |     |             |              |           |           |             |            |       |
|---------|------|-----|-------------|--------------|-----------|-----------|-------------|------------|-------|
| Rv2824c | 70   | 28  | 1,321928095 | -0,677233687 | -2,469115 | 0,0135448 | 0,023731945 | 0,00538408 | FALSE |
| Rv2827c | 183  | 59  | 1,633056789 | -0,366104993 | -2,044961 | 0,0408587 | 0,064407157 | 0,01461522 | FALSE |
| Rv2828A | 25   | 6   | 2,058893689 | 0,059731907  | 0,1145407 | 0,9088092 | 0,928466101 | 0,21065951 | FALSE |
| Rv2828c | 53   | 22  | 1,268488836 | -0,730672946 | -2,339558 | 0,0193066 | 0,032624297 | 0,00740308 | FALSE |
| Rv2829c | 85   | 11  | 2,949959318 | 0,950797536  | 2,880887  | 0,0039656 | 0,007787025 | 0,00176659 | FALSE |
| Rv2830c | 198  | 36  | 2,459431619 | 0,460269837  | 2,3174116 | 0,0204813 | 0,034359136 | 0,00779675 | FALSE |
| Rv2831  | 20   | 9   | 1,152003093 | -0,847158688 | -1,700254 | 0,0890831 | 0,128321319 | 0,02911857 | FALSE |
| Rv2833c | 39   | 4   | 3,285402219 | 1,286240437  | 2,4907725 | 0,0127466 | 0,022443071 | 0,00509276 | FALSE |
| Rv2834c | 28   | 4   | 2,807354922 | 0,80819314   | 1,4406217 | 0,1496916 | 0,203335171 | 0,04613271 | FALSE |
| Rv2835c | 57   | 8   | 2,832890014 | 0,833728232  | 2,1110508 | 0,0347679 | 0,055617431 | 0,0126181  | FALSE |
| Rv2841c | 597  | 122 | 2,290849784 | 0,291688002  | 2,6260152 | 0,0086391 | 0,015855093 | 0,00359783 | FALSE |
| Rv2842c | 762  | 176 | 2,114215569 | 0,115053787  | 1,2066659 | 0,2275608 | 0,292440494 | 0,06636037 | FALSE |
| Rv2843  | 35   | 6   | 2,544320516 | 0,545158734  | 1,1371272 | 0,2554851 | 0,322339504 | 0,07314503 | FALSE |
| Rv2844  | 185  | 39  | 2,245979242 | 0,24681746   | 1,2464757 | 0,2125898 | 0,275988851 | 0,06262717 | FALSE |
| Rv2846c | 2327 | 598 | 1,960253821 | -0,038907961 | -0,732716 | 0,4637316 | 0,537138803 | 0,12188711 | FALSE |
| Rv2851c | 381  | 70  | 2,444364171 | 0,445202389  | 3,1176812 | 0,0018228 | 0,003807795 | 0,00086406 | FALSE |
| Rv2853  | 98   | 24  | 2,029747343 | 0,030585562  | 0,116712  | 0,9070883 | 0,92730849  | 0,21042411 | FALSE |
| Rv2856  | 204  | 62  | 1,718229032 | -0,28093275  | -1,632539 | 0,102566  | 0,145930805 | 0,0331145  | FALSE |
| Rv2858c | 316  | 65  | 2,281412935 | 0,282251153  | 1,8516091 | 0,064082  | 0,095952663 | 0,0217735  | FALSE |
| Rv2859c | 216  | 56  | 1,94753258  | -0,051629202 | -0,296696 | 0,766699  | 0,810903934 | 0,18400968 | FALSE |
| Rv2860c | 400  | 97  | 2,043943348 | 0,044781566  | 0,3444166 | 0,730533  | 0,779551441 | 0,1768952  | FALSE |
| Rv2862A | NA   | NA  | NA          | NA           | NA        | NA        | NA          | NA         | FALSE |
| Rv2862c | 52   | 12  | 2,115477217 | 0,116315436  | 0,3185425 | 0,7500735 | 0,797382685 | 0,18094145 | FALSE |
| Rv2863  | 2    | 0   | NA          | NA           | NA        | NA        | NA          | NA         | FALSE |
| Rv2865  | 78   | 12  | 2,700439718 | 0,701277936  | 2,1254183 | 0,0335517 | 0,053770014 | 0,01220041 | FALSE |
| Rv2866  | 11   | 1   | 3,459431619 | 1,460269837  | 1,4571684 | 0,1450699 | 0,197567576 | 0,0448164  | FALSE |
| Rv2869c | 680  | 149 | 2,190222416 | 0,191060634  | 1,8681092 | 0,0617469 | 0,092843919 | 0,02106807 | FALSE |
| Rv2870c | 181  | 37  | 2,290392521 | 0,29123074   | 1,4436283 | 0,1488436 | 0,202287741 | 0,04590297 | FALSE |
| Rv2873  | 50   | 7   | 2,836501268 | 0,837339486  | 1,984499  | 0,0472002 | 0,073463985 | 0,01667039 | FALSE |
| Rv2874  | 50   | 17  | 1,556393349 | -0,442768433 | -1,309985 | 0,1902009 | 0,249801026 | 0,05668465 | FALSE |
| Rv2875  | 48   | 7   | 2,777607579 | 0,778445797  | 1,8261877 | 0,067822  | 0,100654734 | 0,0228362  | FALSE |
| Rv2877c | 62   | 23  | 1,430634354 | -0,568527428 | -1,914337 | 0,0555771 | 0,084697128 | 0,01921941 | FALSE |
| Rv2878c | 90   | 17  | 2,404390255 | 0,405228473  | 1,3887057 | 0,1649223 | 0,221808487 | 0,05032403 | FALSE |
| Rv2880c | 143  | 23  | 2,636309381 | 0,637147599  | 2,643918  | 0,0081952 | 0,015114363 | 0,00342894 | FALSE |
| Rv2883c | 1162 | 275 | 2,079106545 | 0,079944763  | 1,0418226 | 0,2974939 | 0,367695432 | 0,08343716 | FALSE |
| Rv2884  | 103  | 20  | 2,364572432 | 0,36541065   | 1,3489225 | 0,1773619 | 0,235368519 | 0,05340964 | FALSE |
| Rv2887  | 92   | 12  | 2,938599455 | 0,939437673  | 2,9671956 | 0,0030053 | 0,00605976  | 0,00137508 | FALSE |

|         |      |      |             |              |           |           |             |            |       |
|---------|------|------|-------------|--------------|-----------|-----------|-------------|------------|-------|
| Rv2891  | 6    | 1    | 2,584962501 | 0,585800719  | 0,502361  | 0,6154136 | 0,680171264 | 0,15423587 | FALSE |
| Rv2892c | 102  | 17   | 2,584962501 | 0,585800719  | 2,0713344 | 0,0383276 | 0,06097777  | 0,01383703 | FALSE |
| Rv2893  | 7    | 5    | 0,485426827 | -1,513734955 | -2,017418 | 0,0436519 | 0,068413674 | 0,01551645 | FALSE |
| Rv2894c | 181  | 55   | 1,718486174 | -0,280675608 | -1,53627  | 0,1244722 | 0,172676114 | 0,03918353 | FALSE |
| Rv2896c | 103  | 33   | 1,642106408 | -0,357055374 | -1,49388  | 0,1352071 | 0,185351706 | 0,04205986 | FALSE |
| Rv2897c | 30   | 7    | 2,099535674 | 0,100373892  | 0,2093663 | 0,8341623 | 0,866913312 | 0,19671609 | FALSE |
| Rv2898c | 134  | 27   | 2,311201688 | 0,312039906  | 1,3260807 | 0,184813  | 0,243617102 | 0,0552814  | FALSE |
| Rv2899c | 195  | 56   | 1,799975392 | -0,19918639  | -1,115756 | 0,2645268 | 0,331520029 | 0,07522826 | FALSE |
| Rv2900c | 858  | 177  | 2,277228287 | 0,278066506  | 3,0084231 | 0,0026261 | 0,005336027 | 0,00121085 | FALSE |
| Rv2901c | 927  | 199  | 2,219800908 | 0,220639126  | 2,5061138 | 0,0122066 | 0,021617851 | 0,00490551 | FALSE |
| Rv2905  | 766  | 165  | 2,214878368 | 0,215716586  | 2,2290934 | 0,0258077 | 0,042481441 | 0,00963985 | FALSE |
| Rv2911  | 36   | 6    | 2,584962501 | 0,585800719  | 1,2305369 | 0,2184961 | 0,282540556 | 0,06411388 | FALSE |
| Rv2912c | 37   | 10   | 1,887525271 | -0,111636511 | -0,268281 | 0,7884834 | 0,829384867 | 0,18817826 | FALSE |
| Rv2913c | 222  | 50   | 2,150559677 | 0,151397895  | 0,851539  | 0,39447   | 0,466783576 | 0,10592216 | FALSE |
| Rv2914c | 110  | 22   | 2,321928095 | 0,322766313  | 1,2404577 | 0,2148061 | 0,278316494 | 0,06310067 | FALSE |
| Rv2915c | 223  | 53   | 2,072979445 | 0,073817663  | 0,4217551 | 0,6732038 | 0,731638428 | 0,16599586 | FALSE |
| Rv2917  | 44   | 8    | 2,459431619 | 0,460269837  | 1,092397  | 0,2746586 | 0,342476661 | 0,07771453 | FALSE |
| Rv2920c | 236  | 40   | 2,560714954 | 0,561553173  | 3,0330936 | 0,0024206 | 0,004954264 | 0,00112422 | FALSE |
| Rv2921c | 560  | 144  | 1,959358016 | -0,039803766 | -0,367587 | 0,713181  | 0,765383925 | 0,17368031 | FALSE |
| Rv2924c | 78   | 9    | 3,115477217 | 1,116315436  | 3,1485128 | 0,001641  | 0,003453705 | 0,00078371 | FALSE |
| Rv2925c | 1528 | 336  | 2,185111405 | 0,185949623  | 2,7284616 | 0,006363  | 0,012065321 | 0,00273735 | FALSE |
| Rv2930  | 834  | 211  | 1,982804385 | -0,016357397 | -0,183615 | 0,8543153 | 0,882740205 | 0,20031071 | FALSE |
| Rv2943  | 103  | 22   | 2,227068909 | 0,227907127  | 0,8616133 | 0,3889003 | 0,460607477 | 0,10450009 | FALSE |
| Rv2943A | 23   | 5    | 2,201633861 | 0,202472079  | 0,3633038 | 0,716378  | 0,767353266 | 0,17407992 | FALSE |
| Rv2944  | 59   | 6    | 3,297680549 | 1,298518767  | 3,086252  | 0,002027  | 0,00420093  | 0,00095327 | FALSE |
| Rv2946c | 3131 | 705  | 2,150928346 | 0,151766564  | 3,2080685 | 0,0013363 | 0,00285656  | 0,00064821 | FALSE |
| Rv2947c | 3136 | 790  | 1,989001001 | -0,010160781 | -0,22108  | 0,8250301 | 0,85923392  | 0,19497668 | FALSE |
| Rv2948c | 2194 | 497  | 2,142245769 | 0,143083987  | 2,5350014 | 0,0112447 | 0,020094719 | 0,00455988 | FALSE |
| Rv2949c | 1236 | 335  | 1,883445743 | -0,115716039 | -1,60897  | 0,1076229 | 0,152246988 | 0,03454777 | FALSE |
| Rv2952  | 416  | 102  | 2,028014376 | 0,028852594  | 0,2269276 | 0,82048   | 0,855398669 | 0,19410639 | FALSE |
| Rv2953  | 576  | 142  | 2,020177882 | 0,0210161    | 0,1947731 | 0,8455706 | 0,87622973  | 0,19883336 | FALSE |
| Rv2955c | 188  | 37   | 2,345135486 | 0,345973704  | 1,7313364 | 0,0833918 | 0,120918076 | 0,02743863 | FALSE |
| Rv2956  | 257  | 47   | 2,451035698 | 0,451873916  | 2,5958532 | 0,0094356 | 0,017165199 | 0,00389511 | FALSE |
| Rv2958c | 159  | 26   | 2,612443237 | 0,613281455  | 2,6946115 | 0,0070471 | 0,013228778 | 0,00300186 | FALSE |
| Rv2961  | 3    | 0 NA | NA          | NA           | NA        | NA        | NA          | NA         | FALSE |
| Rv2965c | 97   | 16   | 2,599912842 | 0,60075106   | 2,0661172 | 0,0388174 | 0,061632803 | 0,01398567 | FALSE |
| Rv2966c | 104  | 28   | 1,893084796 | -0,106076986 | -0,426983 | 0,669392  | 0,72860002  | 0,16531053 | FALSE |

|         |      |     |             |              |           |           |             |            |       |
|---------|------|-----|-------------|--------------|-----------|-----------|-------------|------------|-------|
| Rv2968c | 161  | 56  | 1,523561956 | -0,475599826 | -2,53949  | 0,0111014 | 0,019883736 | 0,00451104 | FALSE |
| Rv2969c | 708  | 141 | 2,328054198 | 0,328892416  | 3,2038606 | 0,001356  | 0,002893934 | 0,00065669 | FALSE |
| Rv2970A | 66   | 21  | 1,652076697 | -0,347085085 | -1,160416 | 0,2458795 | 0,313175748 | 0,07105412 | FALSE |
| Rv2970c | 477  | 93  | 2,358686645 | 0,359524863  | 2,859299  | 0,0042458 | 0,008289789 | 0,00188111 | FALSE |
| Rv2972c | 19   | 3   | 2,662965013 | 0,663803231  | 0,999396  | 0,3176029 | 0,388531606 | 0,08816528 | FALSE |
| Rv2973c | 114  | 20  | 2,510961919 | 0,511800137  | 1,9378657 | 0,0526396 | 0,080782341 | 0,01833106 | FALSE |
| Rv2974c | 88   | 24  | 1,874469118 | -0,124692664 | -0,463184 | 0,6432325 | 0,704892765 | 0,15995371 | FALSE |
| Rv2975c | 208  | 41  | 2,342887714 | 0,343725932  | 1,8099843 | 0,0702982 | 0,103880166 | 0,02357241 | FALSE |
| Rv2976c | 140  | 24  | 2,544320516 | 0,545158734  | 2,2743113 | 0,0229473 | 0,038106968 | 0,0086472  | FALSE |
| Rv2979c | 175  | 60  | 1,544320516 | -0,454841266 | -2,52296  | 0,0116371 | 0,020730316 | 0,00470411 | FALSE |
| Rv2980  | 47   | 4   | 3,554588852 | 1,55542707   | 3,1558777 | 0,0016002 | 0,003372176 | 0,00076501 | FALSE |
| Rv2981c | 207  | 48  | 2,108524457 | 0,109362675  | 0,5983077 | 0,5496347 | 0,61971386  | 0,14062498 | FALSE |
| Rv2982c | 250  | 77  | 1,698997744 | -0,300164038 | -1,937442 | 0,0526914 | 0,080830308 | 0,01834195 | FALSE |
| Rv2983  | 15   | 2   | 2,906890596 | 0,907728814  | 1,1640334 | 0,2444105 | 0,311505887 | 0,07067525 | FALSE |
| Rv2984  | 468  | 106 | 2,142444265 | 0,143282483  | 1,1718293 | 0,2412656 | 0,307945461 | 0,06987874 | FALSE |
| Rv2987c | 189  | 56  | 1,754887502 | -0,24427428  | -1,357668 | 0,1745691 | 0,232916258 | 0,05285317 | FALSE |
| Rv2988c | 386  | 107 | 1,850990051 | -0,148171731 | -1,157542 | 0,2470512 | 0,314414284 | 0,07134664 | FALSE |
| Rv2989  | 114  | 37  | 1,623436649 | -0,375725133 | -1,65917  | 0,0970816 | 0,138552554 | 0,03143455 | FALSE |
| Rv2990c | 581  | 148 | 1,972940988 | -0,026220794 | -0,246069 | 0,8056291 | 0,843483185 | 0,19140254 | FALSE |
| Rv2991  | 32   | 15  | 1,093109404 | -0,906052377 | -2,323789 | 0,0201368 | 0,033910986 | 0,00769208 | FALSE |
| Rv2992c | 461  | 86  | 2,422358186 | 0,423196404  | 3,2724215 | 0,0010663 | 0,002314533 | 0,00052521 | FALSE |
| Rv2994  | 224  | 41  | 2,449802917 | 0,450641136  | 2,4173548 | 0,0156338 | 0,026984504 | 0,0061233  | FALSE |
| Rv2996c | 785  | 160 | 2,294620749 | 0,295458967  | 3,0483221 | 0,0023012 | 0,004719738 | 0,001071   | FALSE |
| Rv2997  | 39   | 16  | 1,285402219 | -0,713759563 | -1,954708 | 0,0506175 | 0,078257723 | 0,01775818 | FALSE |
| Rv2998  | 94   | 22  | 2,095157233 | 0,095995451  | 0,3547131 | 0,7228045 | 0,772872698 | 0,17535589 | FALSE |
| Rv2998A | NA   | NA  | NA          | NA           | NA        | NA        | NA          | NA         | FALSE |
| Rv2999  | 74   | 11  | 2,750021747 | 0,750859965  | 2,1976059 | 0,0279772 | 0,045728176 | 0,0103766  | FALSE |
| Rv3000  | 56   | 14  | 2           | 0,000838218  | 0,0024304 | 0,9980609 | 1           | 0,22680161 | FALSE |
| Rv3001c | 1098 | 320 | 1,778734244 | -0,220427538 | -2,941574 | 0,0032655 | 0,006540918 | 0,00148426 | FALSE |
| Rv3002c | 247  | 76  | 1,700439718 | -0,298722064 | -1,91605  | 0,0553587 | 0,084429565 | 0,01915455 | FALSE |
| Rv3003c | 757  | 190 | 1,994293882 | -0,0048679   | -0,051955 | 0,9585646 | 0,969627826 | 0,22002718 | FALSE |
| Rv3004  | 45   | 17  | 1,404390255 | -0,594771527 | -1,713958 | 0,0865365 | 0,125155855 | 0,02840027 | FALSE |
| Rv3006  | 428  | 101 | 2,083255504 | 0,084093722  | 0,6644839 | 0,5063806 | 0,578553068 | 0,1312848  | FALSE |
| Rv3007c | 170  | 26  | 2,708951218 | 0,709789436  | 3,1712418 | 0,0015179 | 0,003223774 | 0,00073154 | FALSE |
| Rv3009c | 798  | 193 | 2,047787899 | 0,048626117  | 0,5279411 | 0,5975403 | 0,664420286 | 0,15076973 | FALSE |
| Rv3011c | 181  | 57  | 1,666955873 | -0,332205909 | -1,834631 | 0,0665604 | 0,099136752 | 0,02249603 | FALSE |
| Rv3012c | 20   | 2   | 3,321928095 | 1,322766313  | 1,8227509 | 0,0683411 | 0,101329842 | 0,02298505 | FALSE |

|         |     |      |             |              |           |           |             |            |       |
|---------|-----|------|-------------|--------------|-----------|-----------|-------------|------------|-------|
| Rv3014c | 233 | 73   | 1,674361586 | -0,324800196 | -2,032573 | 0,0420956 | 0,066304009 | 0,01504565 | FALSE |
| Rv3015c | 100 | 27   | 1,888968688 | -0,110193094 | -0,435247 | 0,663383  | 0,723057262 | 0,1640456  | FALSE |
| Rv3016  | 109 | 34   | 1,680721484 | -0,318440298 | -1,361436 | 0,1733759 | 0,23187343  | 0,05258096 | FALSE |
| Rv3017c | 26  | 8    | 1,700439718 | -0,298722064 | -0,621605 | 0,5342018 | 0,603953483 | 0,13702901 | FALSE |
| Rv3018A | 4   | 0 NA | NA          | NA           | NA        | NA        | NA          | NA         | FALSE |
| Rv3019c | 25  | 3    | 3,058893689 | 1,059731907  | 1,7087995 | 0,0874881 | 0,126369903 | 0,02866001 | FALSE |
| Rv3020c | 7   | 0    | 3,807354922 | 1,80819314   | 1,355158  | 0,1753672 | 0,233310295 | 0,05286234 | FALSE |
| Rv3022A | 13  | 3    | 2,115477217 | 0,116315436  | 0,1592695 | 0,8734565 | 0,89816518  | 0,20378437 | FALSE |
| Rv3023c | 7   | 0    | 3,807354922 | 1,80819314   | 1,355158  | 0,1753672 | 0,233310295 | 0,05286234 | FALSE |
| Rv3025c | 578 | 165  | 1,808603468 | -0,190558314 | -1,83521  | 0,0664746 | 0,099046419 | 0,02247554 | FALSE |
| Rv3026c | 47  | 9    | 2,38466385  | 0,385502068  | 0,9579538 | 0,338086  | 0,411166007 | 0,09330147 | FALSE |
| Rv3030  | 108 | 39   | 1,469485283 | -0,529676499 | -2,338173 | 0,0193783 | 0,032717426 | 0,00742421 | FALSE |
| Rv3031  | 178 | 48   | 1,89077093  | -0,108390852 | -0,57103  | 0,5679795 | 0,637300496 | 0,14460917 | FALSE |
| Rv3032  | 122 | 32   | 1,930737338 | -0,068424444 | -0,296368 | 0,7669487 | 0,810950592 | 0,18402027 | FALSE |
| Rv3032A | 55  | 11   | 2,321928095 | 0,322766313  | 0,8771237 | 0,3804195 | 0,452669912 | 0,10270401 | FALSE |
| Rv3033  | 74  | 16   | 2,209453366 | 0,210291584  | 0,6759212 | 0,4990907 | 0,571631684 | 0,12969538 | FALSE |
| Rv3034c | 226 | 49   | 2,205469118 | 0,206307336  | 1,1596976 | 0,246172  | 0,313396454 | 0,07111568 | FALSE |
| Rv3035  | 131 | 40   | 1,711494907 | -0,287666875 | -1,341122 | 0,1798807 | 0,238070328 | 0,05402273 | FALSE |
| Rv3036c | 137 | 22   | 2,638600464 | 0,639438682  | 2,5961278 | 0,0094281 | 0,0171594   | 0,0038938  | FALSE |
| Rv3037c | 130 | 30   | 2,115477217 | 0,116315436  | 0,5036708 | 0,6144928 | 0,679820313 | 0,15423587 | FALSE |
| Rv3038c | 691 | 159  | 2,119658945 | 0,120497163  | 1,2022815 | 0,2292545 | 0,294521088 | 0,066821   | FALSE |
| Rv3040c | 78  | 32   | 1,285402219 | -0,713759563 | -2,764415 | 0,0057025 | 0,010896638 | 0,00247266 | FALSE |
| Rv3042c | 853 | 246  | 1,793887426 | -0,205274356 | -2,407953 | 0,0160423 | 0,027544918 | 0,00624901 | FALSE |
| Rv3044  | 409 | 104  | 1,975517315 | -0,023644467 | -0,186079 | 0,8523826 | 0,881436049 | 0,19996573 | FALSE |
| Rv3046c | 119 | 34   | 1,807354922 | -0,19180686  | -0,838232 | 0,4019005 | 0,474011862 | 0,1075624  | FALSE |
| Rv3055  | 69  | 10   | 2,786596362 | 0,78743458   | 2,2113676 | 0,0270104 | 0,044239606 | 0,01003882 | FALSE |
| Rv3056  | 89  | 25   | 1,831877241 | -0,167284541 | -0,629546 | 0,5289914 | 0,599007214 | 0,13592624 | FALSE |
| Rv3057c | 248 | 43   | 2,527931556 | 0,528769774  | 2,9444224 | 0,0032356 | 0,006484315 | 0,00147142 | FALSE |
| Rv3060c | 305 | 78   | 1,967263214 | -0,031898568 | -0,217088 | 0,8281397 | 0,862017142 | 0,19558153 | FALSE |
| Rv3061c | 453 | 115  | 1,977877189 | -0,021284593 | -0,176218 | 0,8601231 | 0,887114372 | 0,20130329 | FALSE |
| Rv3063  | 177 | 56   | 1,660250628 | -0,338911154 | -1,853014 | 0,0638803 | 0,095759819 | 0,02172974 | FALSE |
| Rv3064c | 27  | 2    | 3,754887502 | 1,75572572   | 2,6078618 | 0,009111  | 0,016643667 | 0,00377327 | FALSE |
| Rv3065  | 47  | 13   | 1,854149134 | -0,145012648 | -0,395048 | 0,6928074 | 0,747383015 | 0,16959556 | FALSE |
| Rv3066  | 13  | 1    | 3,700439718 | 1,701277936  | 1,7700667 | 0,076716  | 0,112228491 | 0,02544792 | FALSE |
| Rv3067  | 23  | 5    | 2,201633861 | 0,202472079  | 0,3633038 | 0,716378  | 0,767353266 | 0,17407992 | FALSE |
| Rv3068c | 130 | 50   | 1,378511623 | -0,620650159 | -3,053676 | 0,0022606 | 0,004643564 | 0,00105371 | FALSE |
| Rv3070  | 38  | 15   | 1,341036918 | -0,658124864 | -1,762019 | 0,0780661 | 0,113949884 | 0,02585742 | FALSE |

|         |     |      |             |              |           |           |             |            |       |
|---------|-----|------|-------------|--------------|-----------|-----------|-------------|------------|-------|
| Rv3071  | 38  | 4    | 3,247927513 | 1,248765732  | 2,4025508 | 0,0162812 | 0,027888359 | 0,00632703 | FALSE |
| Rv3073c | 31  | 7    | 2,146841388 | 0,147679606  | 0,3105752 | 0,7561236 | 0,802408562 | 0,18205742 | FALSE |
| Rv3074  | 75  | 24   | 1,64385619  | -0,355305592 | -1,268114 | 0,2047571 | 0,266962684 | 0,06057896 | FALSE |
| Rv3076  | 305 | 88   | 1,793233814 | -0,205927968 | -1,444374 | 0,1486339 | 0,202072415 | 0,04585411 | FALSE |
| Rv3079c | 63  | 25   | 1,333423734 | -0,665738048 | -2,298058 | 0,0215585 | 0,035997705 | 0,00816857 | FALSE |
| Rv3080c | 276 | 65   | 2,086156644 | 0,086994862  | 0,5517093 | 0,5811475 | 0,648937083 | 0,14725629 | FALSE |
| Rv3081  | 107 | 16   | 2,741466986 | 0,742305205  | 2,6163535 | 0,0088874 | 0,016280586 | 0,00369438 | FALSE |
| Rv3082c | 23  | 3    | 2,938599455 | 0,939437673  | 1,4835765 | 0,1379213 | 0,188580907 | 0,04278521 | FALSE |
| Rv3084  | 28  | 6    | 2,222392421 | 0,223230639  | 0,4403642 | 0,6596734 | 0,720008781 | 0,16336122 | FALSE |
| Rv3085  | 35  | 3    | 3,544320516 | 1,545158734  | 2,7101955 | 0,0067244 | 0,012674247 | 0,00287534 | FALSE |
| Rv3086  | 264 | 59   | 2,16175107  | 0,162589288  | 0,9953246 | 0,3195784 | 0,390705893 | 0,08865867 | FALSE |
| Rv3087  | 125 | 30   | 2,058893689 | 0,059731907  | 0,256128  | 0,797852  | 0,837118423 | 0,18995825 | FALSE |
| Rv3088  | 77  | 9    | 3,096861539 | 1,097699757  | 3,0860367 | 0,0020284 | 0,004201764 | 0,00095346 | FALSE |
| Rv3089  | 107 | 19   | 2,493539473 | 0,494377691  | 1,8189975 | 0,0689118 | 0,102041735 | 0,02315088 | FALSE |
| Rv3090  | 29  | 8    | 1,857980995 | -0,141180787 | -0,301911 | 0,7627199 | 0,807995469 | 0,18330046 | FALSE |
| Rv3091  | 212 | 48   | 2,142957954 | 0,143796172  | 0,7913971 | 0,4287123 | 0,502031271 | 0,11392054 | FALSE |
| Rv3092c | 705 | 183  | 1,945779609 | -0,053382173 | -0,554465 | 0,579261  | 0,647196964 | 0,14686142 | FALSE |
| Rv3094c | 263 | 66   | 1,99452487  | -0,004636912 | -0,029165 | 0,9767329 | 0,984722504 | 0,22345245 | FALSE |
| Rv3097c | 53  | 17   | 1,640457613 | -0,358704169 | -1,076844 | 0,28155   | 0,350073527 | 0,07943841 | FALSE |
| Rv3098c | 67  | 13   | 2,365649472 | 0,36648769   | 1,0909352 | 0,2753014 | 0,343115432 | 0,07784718 | FALSE |
| Rv3104c | 494 | 142  | 1,798620112 | -0,20054167  | -1,788555 | 0,0736865 | 0,108157626 | 0,02454304 | FALSE |
| Rv3106  | 131 | 45   | 1,541569905 | -0,457591877 | -2,197081 | 0,0280147 | 0,045770423 | 0,01038619 | FALSE |
| Rv3107c | 95  | 26   | 1,86941589  | -0,129745892 | -0,501196 | 0,6162329 | 0,68040949  | 0,15439798 | FALSE |
| Rv3108  | 1   | 0 NA | NA          | NA           | NA        | NA        | NA          | NA         | FALSE |
| Rv3110  | 30  | 6    | 2,321928095 | 0,322766313  | 0,6477946 | 0,5171178 | 0,588094778 | 0,13345    | FALSE |
| Rv3111  | 18  | 0    | 5,169925001 | 3,17076322   | 3,0092122 | 0,0026193 | 0,005333178 | 0,00120895 | FALSE |
| Rv3112  | 12  | 2    | 2,584962501 | 0,585800719  | 0,7104468 | 0,4774271 | 0,550415821 | 0,12486342 | FALSE |
| Rv3113  | 21  | 2    | 3,392317423 | 1,393155641  | 1,9433061 | 0,0519792 | 0,08000231  | 0,01813637 | FALSE |
| Rv3114  | 12  | 0    | 4,584962501 | 2,585800719  | 2,2174871 | 0,0265898 | 0,043641391 | 0,00989895 | FALSE |
| Rv3115  | 23  | 2    | 3,523561956 | 1,524400174  | 2,175293  | 0,0296082 | 0,048035622 | 0,01089572 | FALSE |
| Rv3116  | 383 | 100  | 1,937344392 | -0,06181739  | -0,4739   | 0,635571  | 0,697659953 | 0,15831244 | FALSE |
| Rv3121  | 256 | 45   | 2,508146904 | 0,508985122  | 2,8894999 | 0,0038586 | 0,007609064 | 0,00172651 | FALSE |
| Rv3124  | 42  | 4    | 3,392317423 | 1,393155641  | 2,7482601 | 0,0059912 | 0,011417965 | 0,00259033 | FALSE |
| Rv3126c | 8   | 2    | 2           | 0,000838218  | 0,0009186 | 0,9992671 | 1           | 0,22680161 | FALSE |
| Rv3129  | 15  | 0    | 4,906890596 | 2,907728814  | 2,6366199 | 0,0083737 | 0,015400193 | 0,00349216 | FALSE |
| Rv3133c | 532 | 152  | 1,807354922 | -0,19180686  | -1,772563 | 0,0763011 | 0,111745894 | 0,02535729 | FALSE |
| Rv3137  | 201 | 46   | 2,127489735 | 0,128327953  | 0,6895431 | 0,4904816 | 0,562833659 | 0,12771777 | FALSE |

|         |      |     |             |              |           |           |             |            |       |
|---------|------|-----|-------------|--------------|-----------|-----------|-------------|------------|-------|
| Rv3138  | 102  | 15  | 2,765534746 | 0,766372964  | 2,6263369 | 0,0086309 | 0,015847487 | 0,0035961  | FALSE |
| Rv3141  | 403  | 82  | 2,297084024 | 0,297922242  | 2,2011809 | 0,0277232 | 0,04535063  | 0,01029093 | FALSE |
| Rv3142c | 198  | 54  | 1,874469118 | -0,124692664 | -0,694799 | 0,4871813 | 0,559372103 | 0,12693228 | FALSE |
| Rv3143  | 6    | 0   | 3,584962501 | 1,585800719  | 1,1435548 | 0,2528083 | 0,319883217 | 0,07249462 | FALSE |
| Rv3146  | 1068 | 238 | 2,165878168 | 0,166716386  | 2,0517247 | 0,0401964 | 0,063388526 | 0,01438407 | FALSE |
| Rv3148  | 1600 | 389 | 2,040229845 | 0,041068063  | 0,6323341 | 0,5271686 | 0,597973203 | 0,13569161 | FALSE |
| Rv3149  | 377  | 125 | 1,592636429 | -0,406525353 | -3,282331 | 0,0010295 | 0,002244583 | 0,00050934 | FALSE |
| Rv3150  | 1164 | 253 | 2,201881768 | 0,202719986  | 2,5883817 | 0,0096428 | 0,017501715 | 0,00397148 | FALSE |
| Rv3156  | 2225 | 533 | 2,061597898 | 0,062436116  | 1,1296667 | 0,2586167 | 0,325769492 | 0,07392336 | FALSE |
| Rv3160c | 79   | 15  | 2,396890153 | 0,397728371  | 1,2786521 | 0,2010196 | 0,262349865 | 0,05953222 | FALSE |
| Rv3163c | 71   | 19  | 1,901819606 | -0,097342176 | -0,323252 | 0,7465046 | 0,793802694 | 0,18012908 | FALSE |
| Rv3164c | 156  | 35  | 2,156119202 | 0,15695742   | 0,7393092 | 0,4597193 | 0,533745289 | 0,12111706 | FALSE |
| Rv3165c | 19   | 11  | 0,788495895 | -1,210665887 | -2,522273 | 0,0116599 | 0,020761488 | 0,00471118 | FALSE |
| Rv3166c | 91   | 14  | 2,700439718 | 0,701277936  | 2,2957209 | 0,0216918 | 0,036205095 | 0,00821563 | FALSE |
| Rv3167c | 7    | 0   | 3,807354922 | 1,80819314   | 1,355158  | 0,1753672 | 0,233310295 | 0,05286234 | FALSE |
| Rv3169  | 96   | 39  | 1,299560282 | -0,6996015   | -2,998663 | 0,0027117 | 0,005498632 | 0,00124775 | FALSE |
| Rv3170  | 59   | 26  | 1,182203331 | -0,816958451 | -2,80152  | 0,0050862 | 0,009804577 | 0,00222485 | FALSE |
| Rv3171c | 609  | 182 | 1,742503778 | -0,256658004 | -2,56648  | 0,0102737 | 0,018501962 | 0,00419845 | FALSE |
| Rv3173c | 261  | 86  | 1,601641242 | -0,39752054  | -2,666302 | 0,0076691 | 0,014250553 | 0,00323296 | FALSE |
| Rv3174  | 21   | 9   | 1,222392421 | -0,776769361 | -1,578115 | 0,1145392 | 0,160591087 | 0,0364412  | FALSE |
| Rv3175  | 20   | 1   | 4,321928095 | 2,322766313  | 2,6914838 | 0,0071135 | 0,013340765 | 0,00302584 | FALSE |
| Rv3177  | 7    | 7   | 0           | -1,999161782 | -2,898187 | 0,0037533 | 0,007420004 | 0,00168374 | FALSE |
| Rv3178  | 3    | 0   | NA          | NA           | NA        | NA        | NA          | NA         | FALSE |
| Rv3179  | 39   | 5   | 2,963474124 | 0,964312342  | 1,9745016 | 0,0483247 | 0,075066067 | 0,01702723 | FALSE |
| Rv3180c | 21   | 2   | 3,392317423 | 1,393155641  | 1,9433061 | 0,0519792 | 0,08000231  | 0,01813637 | FALSE |
| Rv3181c | 5    | 2   | 1,321928095 | -0,677233687 | -0,659883 | 0,5093289 | 0,580911835 | 0,13174386 | FALSE |
| Rv3182  | 54   | 10  | 2,432959407 | 0,433797625  | 1,145827  | 0,2518667 | 0,319357802 | 0,07245677 | FALSE |
| Rv3183  | 6    | 1   | 2,584962501 | 0,585800719  | 0,502361  | 0,6154136 | 0,680171264 | 0,15423587 | FALSE |
| Rv3184  | 55   | 8   | 2,781359714 | 0,782197932  | 1,9629657 | 0,0496502 | 0,076973366 | 0,01745987 | FALSE |
| Rv3185  | 29   | 4   | 2,857980995 | 0,858819213  | 1,544353  | 0,1225028 | 0,170183594 | 0,03860433 | FALSE |
| Rv3186  | 59   | 12  | 2,297680549 | 0,298518767  | 0,8437509 | 0,3988086 | 0,470787565 | 0,10683074 | FALSE |
| Rv3187  | 22   | 1   | 4,459431619 | 2,460269837  | 2,9195587 | 0,0035053 | 0,006975176 | 0,00158121 | FALSE |
| Rv3188  | 170  | 27  | 2,654503434 | 0,655341652  | 2,9557351 | 0,0031192 | 0,006278293 | 0,0014243  | FALSE |
| Rv3189  | 66   | 16  | 2,044394119 | 0,045232337  | 0,1412865 | 0,8876436 | 0,911090778 | 0,2067171  | FALSE |
| Rv3190A | 178  | 29  | 2,617752436 | 0,618590654  | 2,8731179 | 0,0040644 | 0,007963283 | 0,00180702 | FALSE |
| Rv3191c | 5    | 0   | 3,321928095 | 1,322766313  | 0,911373  | 0,3620989 | 0,433814702 | 0,09832204 | FALSE |
| Rv3192  | 4    | 1   | 2           | 0,000838218  | 0,0006495 | 0,9994817 | 0,999862021 | 0,22680161 | FALSE |



|         |      |     |             |              |           |           |             |            |       |
|---------|------|-----|-------------|--------------|-----------|-----------|-------------|------------|-------|
| Rv3194c | 180  | 42  | 2,099535674 | 0,100373892  | 0,5128621 | 0,6080478 | 0,673445815 | 0,15281779 | FALSE |
| Rv3195  | 121  | 18  | 2,748938236 | 0,749776454  | 2,8066326 | 0,0050062 | 0,009659772 | 0,00219199 | FALSE |
| Rv3196  | 6    | 0   | 3,584962501 | 1,585800719  | 1,1435548 | 0,2528083 | 0,319883217 | 0,07249462 | FALSE |
| Rv3196A | 23   | 2   | 3,523561956 | 1,524400174  | 2,175293  | 0,0296082 | 0,048035622 | 0,01089572 | FALSE |
| Rv3198A | 99   | 19  | 2,381429107 | 0,382267325  | 1,3794401 | 0,1677591 | 0,225201461 | 0,05110254 | FALSE |
| Rv3199c | 292  | 74  | 1,980371193 | -0,018790589 | -0,124841 | 0,9006492 | 0,921920656 | 0,20920151 | FALSE |
| Rv3202c | 165  | 27  | 2,611434712 | 0,61227293   | 2,7409512 | 0,0061262 | 0,011660993 | 0,0026461  | FALSE |
| Rv3203  | 106  | 20  | 2,40599236  | 0,406830578  | 1,5126439 | 0,1303701 | 0,179877503 | 0,04079945 | FALSE |
| Rv3204  | 91   | 26  | 1,807354922 | -0,19180686  | -0,733006 | 0,4635547 | 0,537091563 | 0,12187639 | FALSE |
| Rv3206c | 718  | 211 | 1,766740845 | -0,232420937 | -2,513055 | 0,0119691 | 0,021235281 | 0,00481869 | FALSE |
| Rv3208  | 533  | 143 | 1,898120386 | -0,101041396 | -0,920051 | 0,3575462 | 0,430058608 | 0,09758856 | FALSE |
| Rv3212  | 560  | 135 | 2,05246742  | 0,053305638  | 0,4843954 | 0,6281053 | 0,691582158 | 0,15693328 | FALSE |
| Rv3215  | 118  | 16  | 2,882643049 | 0,883481267  | 3,19107   | 0,0014175 | 0,003016999 | 0,00068461 | FALSE |
| Rv3218  | 36   | 15  | 1,263034406 | -0,736127376 | -1,944397 | 0,0518476 | 0,079940234 | 0,01813637 | FALSE |
| Rv3221A | 807  | 167 | 2,272720571 | 0,273558789  | 2,8725502 | 0,0040717 | 0,007973644 | 0,00180937 | FALSE |
| Rv3221c | 616  | 127 | 2,278101854 | 0,278940072  | 2,5565518 | 0,0105715 | 0,018986395 | 0,00430838 | FALSE |
| Rv3222c | 433  | 108 | 2,003335713 | 0,004173931  | 0,033636  | 0,9731674 | 0,982006437 | 0,22280762 | FALSE |
| Rv3224  | 593  | 126 | 2,234608371 | 0,235446589  | 2,1332645 | 0,032903  | 0,052837771 | 0,01198991 | FALSE |
| Rv3224A | 117  | 19  | 2,622437206 | 0,623275424  | 2,3450618 | 0,0190239 | 0,032215702 | 0,00731036 | FALSE |
| Rv3224B | 95   | 17  | 2,482392767 | 0,483230985  | 1,678555  | 0,0932388 | 0,133527168 | 0,03029988 | FALSE |
| Rv3225c | 291  | 72  | 2,014950341 | 0,01578856   | 0,1040909 | 0,9170972 | 0,935600478 | 0,21230572 | FALSE |
| Rv3226c | 163  | 36  | 2,178803153 | 0,179641371  | 0,8615404 | 0,3889405 | 0,460516708 | 0,10450009 | FALSE |
| Rv3228  | 110  | 32  | 1,781359714 | -0,217802068 | -0,919264 | 0,3579576 | 0,430422235 | 0,09767107 | FALSE |
| Rv3231c | 66   | 20  | 1,722466024 | -0,276695757 | -0,913866 | 0,3607871 | 0,433032317 | 0,09826335 | FALSE |
| Rv3232c | 419  | 95  | 2,140950825 | 0,141789043  | 1,0975002 | 0,2724228 | 0,340388249 | 0,0772284  | FALSE |
| Rv3233c | 329  | 74  | 2,152490408 | 0,153328626  | 1,0495347 | 0,2939321 | 0,363977453 | 0,08259348 | FALSE |
| Rv3234c | 220  | 61  | 1,850622376 | -0,148539406 | -0,876065 | 0,3809946 | 0,453149199 | 0,10282826 | FALSE |
| Rv3235  | 29   | 4   | 2,857980995 | 0,858819213  | 1,544353  | 0,1225028 | 0,170183594 | 0,03860433 | FALSE |
| Rv3236c | 494  | 157 | 1,653746483 | -0,345415299 | -3,15897  | 0,0015833 | 0,003344643 | 0,00075896 | FALSE |
| Rv3238c | 206  | 53  | 1,958580073 | -0,040581709 | -0,227311 | 0,8201822 | 0,855314234 | 0,19408723 | FALSE |
| Rv3239c | 261  | 86  | 1,601641242 | -0,39752054  | -2,666302 | 0,0076691 | 0,014250553 | 0,00323296 | FALSE |
| Rv3242c | 45   | 15  | 1,584962501 | -0,414199281 | -1,15683  | 0,247342  | 0,314581337 | 0,07136154 | FALSE |
| Rv3244c | 685  | 147 | 2,220287833 | 0,221126051  | 2,1587328 | 0,0308709 | 0,050001992 | 0,01134641 | FALSE |
| Rv3247c | 130  | 34  | 1,934904972 | -0,06425681  | -0,287091 | 0,7740429 | 0,817575087 | 0,18550911 | FALSE |
| Rv3248c | 1826 | 487 | 1,906693088 | -0,092468694 | -1,556739 | 0,1195325 | 0,16693919  | 0,03788171 | FALSE |
| Rv3249c | 238  | 61  | 1,964080426 | -0,035081356 | -0,211014 | 0,8328765 | 0,86580521  | 0,19646783 | FALSE |
| Rv3253c | 116  | 40  | 1,5360529   | -0,463108882 | -2,094389 | 0,0362254 | 0,057796475 | 0,01311513 | FALSE |

|         |      |      |             |              |           |           |             |            |       |
|---------|------|------|-------------|--------------|-----------|-----------|-------------|------------|-------|
| Rv3254  | 242  | 40   | 2,596935142 | 0,597773361  | 3,2490592 | 0,0011579 | 0,002499537 | 0,00056719 | FALSE |
| Rv3255c | 363  | 74   | 2,294372372 | 0,29521059   | 2,071024  | 0,0383566 | 0,060999289 | 0,01384191 | FALSE |
| Rv3256c | 227  | 55   | 2,045188774 | 0,046026992  | 0,2666032 | 0,7897747 | 0,830410955 | 0,1884362  | FALSE |
| Rv3257c | 1310 | 286  | 2,19547976  | 0,196317978  | 2,6622581 | 0,0077618 | 0,014399188 | 0,00326745 | FALSE |
| Rv3258c | 254  | 55   | 2,207324973 | 0,208163191  | 1,24011   | 0,2149347 | 0,278117596 | 0,06311023 | FALSE |
| Rv3259  | 29   | 12   | 1,273018494 | -0,726143287 | -1,7185   | 0,0857055 | 0,124136106 | 0,02816887 | FALSE |
| Rv3264c | 1061 | 249  | 2,091207009 | 0,092045227  | 1,1437633 | 0,2527218 | 0,320287541 | 0,07249462 | FALSE |
| Rv3266c | 234  | 51   | 2,197939378 | 0,198777596  | 1,1384629 | 0,2549272 | 0,321738565 | 0,07300866 | FALSE |
| Rv3268  | 336  | 72   | 2,222392421 | 0,223230639  | 1,5255915 | 0,1271116 | 0,176028169 | 0,03994417 | FALSE |
| Rv3272  | 363  | 111  | 1,709409872 | -0,28975191  | -2,249632 | 0,0244723 | 0,040486047 | 0,00918706 | FALSE |
| Rv3275c | 197  | 54   | 1,867164317 | -0,131997465 | -0,734571 | 0,4626006 | 0,536143593 | 0,12166128 | FALSE |
| Rv3279c | 102  | 18   | 2,502500341 | 0,503338559  | 1,805372  | 0,0710165 | 0,104862976 | 0,02379542 | FALSE |
| Rv3281  | 670  | 139  | 2,269076213 | 0,269914431  | 2,5840592 | 0,0097645 | 0,017706298 | 0,0040179  | FALSE |
| Rv3282  | 232  | 52   | 2,157541277 | 0,158379495  | 0,9095506 | 0,3630595 | 0,433911162 | 0,09846278 | FALSE |
| Rv3286c | 116  | 24   | 2,273018494 | 0,273856713  | 1,0900126 | 0,2757076 | 0,343404624 | 0,0779128  | FALSE |
| Rv3291c | 43   | 15   | 1,519374159 | -0,479787623 | -1,324869 | 0,1852146 | 0,244064941 | 0,05538302 | FALSE |
| Rv3294c | 2    | 0 NA | NA          | NA           | NA        | NA        | NA          | NA         | FALSE |
| Rv3295  | 713  | 168  | 2,085440844 | 0,086279062  | 0,879669  | 0,3790386 | 0,451231005 | 0,10239298 | FALSE |
| Rv3297  | 26   | 11   | 1,2410081   | -0,758153682 | -1,708365 | 0,0875687 | 0,126347488 | 0,02866543 | FALSE |
| Rv3298c | 205  | 37   | 2,470026734 | 0,470864952  | 2,4078791 | 0,0160455 | 0,027538483 | 0,00624901 | FALSE |
| Rv3299c | 707  | 218  | 1,69738208  | -0,301779702 | -3,277063 | 0,0010489 | 0,002279325 | 0,00051722 | FALSE |
| Rv3300c | 296  | 94   | 1,654864514 | -0,344297268 | -2,436732 | 0,0148206 | 0,025750061 | 0,00584318 | FALSE |
| Rv3301c | 696  | 184  | 1,91938154  | -0,079780242 | -0,827121 | 0,4081683 | 0,479825818 | 0,1088817  | FALSE |
| Rv3302c | 573  | 128  | 2,162391329 | 0,163229547  | 1,4720931 | 0,1409957 | 0,192351145 | 0,04364817 | FALSE |
| Rv3303c | 280  | 49   | 2,514573173 | 0,515411391  | 3,0566764 | 0,0022381 | 0,004604538 | 0,00104486 | FALSE |
| Rv3305c | 268  | 79   | 1,762308442 | -0,23685334  | -1,565611 | 0,1174396 | 0,164248855 | 0,03727122 | FALSE |
| Rv3306c | 265  | 87   | 1,606905054 | -0,392256728 | -2,648667 | 0,008081  | 0,014935086 | 0,00338906 | FALSE |
| Rv3312c | 221  | 78   | 1,502500341 | -0,496661441 | -3,118478 | 0,0018179 | 0,003799532 | 0,00086219 | FALSE |
| Rv3314c | 134  | 40   | 1,744161096 | -0,255000686 | -1,19558  | 0,2318607 | 0,297288194 | 0,0674604  | FALSE |
| Rv3315c | 73   | 16   | 2,189824559 | 0,190662777  | 0,610749  | 0,5413657 | 0,611264369 | 0,13870763 | FALSE |
| Rv3316  | 135  | 32   | 2,076815597 | 0,077653815  | 0,3449672 | 0,730119  | 0,779320559 | 0,1768428  | FALSE |
| Rv3322c | 29   | 13   | 1,157541277 | -0,841620505 | -2,032049 | 0,0421487 | 0,066347853 | 0,0150526  | FALSE |
| Rv3323c | 192  | 44   | 2,125530882 | 0,1263691    | 0,6638653 | 0,5067765 | 0,578837698 | 0,13134939 | FALSE |
| Rv3324c | 29   | 6    | 2,273018494 | 0,273856713  | 0,5449939 | 0,5857577 | 0,652606912 | 0,14804722 | FALSE |
| Rv3325  | 60   | 8    | 2,906890596 | 0,907728814  | 2,3280888 | 0,0199074 | 0,033553311 | 0,00761325 | FALSE |
| Rv3326  | 19   | 1    | 4,247927513 | 2,248765732  | 2,5725352 | 0,0100957 | 0,018214691 | 0,00413137 | FALSE |
| Rv3327  | 45   | 15   | 1,584962501 | -0,414199281 | -1,15683  | 0,247342  | 0,314581337 | 0,07136154 | FALSE |

|         |     |    |             |              |           |           |             |            |       |
|---------|-----|----|-------------|--------------|-----------|-----------|-------------|------------|-------|
| Rv3329  | 150 | 38 | 1,980891177 | -0,018270605 | -0,08699  | 0,9306796 | 0,946031066 | 0,21457858 | FALSE |
| Rv3330  | 185 | 49 | 1,916671616 | -0,082490165 | -0,441058 | 0,6591711 | 0,719759375 | 0,16332723 | FALSE |
| Rv3331  | 262 | 69 | 1,924898545 | -0,074263237 | -0,47187  | 0,6370193 | 0,699055131 | 0,1586064  | FALSE |
| Rv3333c | 5   | 4  | 0,321928095 | -1,677233687 | -1,943479 | 0,0519583 | 0,08007958  | 0,01813637 | FALSE |
| Rv3335c | 397 | 94 | 2,078406345 | 0,079244564  | 0,6035663 | 0,546132  | 0,616293163 | 0,13984876 | FALSE |
| Rv3337  | 259 | 87 | 1,573864792 | -0,42529699  | -2,855369 | 0,0042987 | 0,008380631 | 0,00190173 | FALSE |
| Rv3341  | 143 | 29 | 2,301890342 | 0,30272856   | 1,3311612 | 0,183136  | 0,241487245 | 0,05479809 | FALSE |
| Rv3342  | 132 | 33 | 2           | 0,000838218  | 0,0037314 | 0,9970228 | 1           | 0,22680161 | FALSE |
| Rv3344c | 22  | 1  | 4,459431619 | 2,460269837  | 2,9195587 | 0,0035053 | 0,006975176 | 0,00158121 | FALSE |
| Rv3345c | 32  | 17 | 0,912537159 | -1,086624623 | -2,875496 | 0,0040339 | 0,007911409 | 0,00179525 | FALSE |
| Rv3346c | 50  | 12 | 2,058893689 | 0,059731907  | 0,1619862 | 0,8713167 | 0,896549238 | 0,20344424 | FALSE |
| Rv3348  | 19  | 10 | 0,925999419 | -1,073162363 | -2,183157 | 0,0290243 | 0,047253553 | 0,01072053 | FALSE |
| Rv3349c | 16  | 2  | 3           | 1,000838218  | 1,3043088 | 0,1921283 | 0,252164429 | 0,05722095 | FALSE |
| Rv3351c | 4   | 1  | 2           | 0,000838218  | 0,0006495 | 0,9994817 | 0,999862021 | 0,22680161 | FALSE |
| Rv3352c | 5   | 0  | 3,321928095 | 1,322766313  | 0,911373  | 0,3620989 | 0,433814702 | 0,09832204 | FALSE |
| Rv3354  | 28  | 7  | 2           | 0,000838218  | 0,0017185 | 0,9986288 | 1           | 0,22680161 | FALSE |
| Rv3355c | 127 | 35 | 1,85940167  | -0,139760112 | -0,62531  | 0,5317675 | 0,601632555 | 0,13652198 | FALSE |
| Rv3356c | 182 | 52 | 1,807354922 | -0,19180686  | -1,036656 | 0,2998961 | 0,370084529 | 0,08397929 | FALSE |
| Rv3357  | 27  | 2  | 3,754887502 | 1,75572572   | 2,6078618 | 0,009111  | 0,016643667 | 0,00377327 | FALSE |
| Rv3358  | 18  | 0  | 5,169925001 | 3,17076322   | 3,0092122 | 0,0026193 | 0,005333178 | 0,00120895 | FALSE |
| Rv3359  | 27  | 11 | 1,295455884 | -0,703705898 | -1,600708 | 0,1094415 | 0,15468099  | 0,0350938  | FALSE |
| Rv3361c | 89  | 27 | 1,720845929 | -0,278315853 | -1,067742 | 0,285637  | 0,354484643 | 0,08043937 | FALSE |
| Rv3362c | 118 | 29 | 2,024662054 | 0,025500272  | 0,1068703 | 0,9148919 | 0,933833727 | 0,21190481 | FALSE |
| Rv3363c | 61  | 18 | 1,760812336 | -0,238349446 | -0,751797 | 0,4521731 | 0,526223269 | 0,11941017 | FALSE |
| Rv3364c | 171 | 55 | 1,636492801 | -0,362668981 | -1,95705  | 0,0503416 | 0,077861602 | 0,01766829 | FALSE |
| Rv3366  | 6   | 6  | 0           | -1,999161782 | -2,683198 | 0,0072922 | 0,01363374  | 0,00309245 | FALSE |
| Rv3367  | 246 | 47 | 2,387925654 | 0,388763872  | 2,209015  | 0,0271736 | 0,044469991 | 0,0100911  | FALSE |
| Rv3368c | 40  | 16 | 1,321928095 | -0,677233687 | -1,866455 | 0,0619777 | 0,093120092 | 0,02113074 | FALSE |
| Rv3369  | 58  | 21 | 1,465663572 | -0,53349821  | -1,726955 | 0,0841757 | 0,122009849 | 0,02768638 | FALSE |
| Rv3370c | 102 | 32 | 1,672425342 | -0,32673644  | -1,353247 | 0,1759768 | 0,233687688 | 0,05302823 | FALSE |
| Rv3372  | 92  | 16 | 2,523561956 | 0,524400174  | 1,7798238 | 0,0751048 | 0,110116491 | 0,02498755 | FALSE |
| Rv3373  | 86  | 16 | 2,426264755 | 0,427102973  | 1,4253585 | 0,1540536 | 0,208399041 | 0,04728164 | FALSE |
| Rv3374  | 46  | 11 | 2,064130337 | 0,064968556  | 0,1688395 | 0,8659229 | 0,892279511 | 0,20244891 | FALSE |
| Rv3375  | 76  | 19 | 2           | 0,000838218  | 0,0028313 | 0,997741  | 1           | 0,22680161 | FALSE |
| Rv3377c | 279 | 62 | 2,169925001 | 0,17076322   | 1,0731337 | 0,2832111 | 0,351806216 | 0,07983159 | FALSE |
| Rv3378c | 74  | 15 | 2,30256277  | 0,303400988  | 0,9595855 | 0,3372639 | 0,410292606 | 0,09310327 | FALSE |
| Rv3379c | 81  | 11 | 2,880418384 | 0,881256602  | 2,638195  | 0,0083349 | 0,015346731 | 0,00348247 | FALSE |

|         |     |      |             |              |           |           |             |            |       |
|---------|-----|------|-------------|--------------|-----------|-----------|-------------|------------|-------|
| Rv3380c | 10  | 2    | 2,321928095 | 0,322766313  | 0,3740024 | 0,7084025 | 0,761395133 | 0,17275164 | FALSE |
| Rv3381c | 22  | 7    | 1,652076697 | -0,347085085 | -0,669957 | 0,5028853 | 0,575059292 | 0,130492   | FALSE |
| Rv3384c | 60  | 10   | 2,584962501 | 0,585800719  | 1,5886253 | 0,112145  | 0,157851521 | 0,03581954 | FALSE |
| Rv3385c | 226 | 74   | 1,610725597 | -0,388436185 | -2,420554 | 0,0154969 | 0,026771689 | 0,00607501 | FALSE |
| Rv3387  | 24  | 3    | 3           | 1,000838218  | 1,5974481 | 0,1101659 | 0,155537553 | 0,03527552 | FALSE |
| Rv3388  | 25  | 8    | 1,64385619  | -0,355305592 | -0,732134 | 0,4640867 | 0,537313298 | 0,12190882 | FALSE |
| Rv3390  | 119 | 33   | 1,850423644 | -0,148738138 | -0,64518  | 0,5188106 | 0,589594846 | 0,13377112 | FALSE |
| Rv3391  | 176 | 34   | 2,371968777 | 0,372806996  | 1,7967139 | 0,0723811 | 0,106558746 | 0,0241712  | FALSE |
| Rv3393  | 127 | 43   | 1,562419932 | -0,43674185  | -2,057259 | 0,0396613 | 0,062644878 | 0,01421305 | FALSE |
| Rv3395A | 13  | 1    | 3,700439718 | 1,701277936  | 1,7700667 | 0,076716  | 0,112228491 | 0,02544792 | FALSE |
| Rv3397c | 71  | 10   | 2,827819025 | 0,828657243  | 2,3438176 | 0,0190875 | 0,032288706 | 0,00732536 | FALSE |
| Rv3398c | 30  | 2    | 3,906890596 | 1,907728814  | 2,9092699 | 0,0036227 | 0,007181746 | 0,00162927 | FALSE |
| Rv3399  | 87  | 13   | 2,742503778 | 0,743341996  | 2,3620569 | 0,0181739 | 0,030855649 | 0,00700174 | FALSE |
| Rv3400  | 176 | 54   | 1,704544116 | -0,294617665 | -1,593997 | 0,1109368 | 0,156429997 | 0,03549697 | FALSE |
| Rv3401  | 435 | 104  | 2,064431873 | 0,065270091  | 0,5216458 | 0,601917  | 0,668344766 | 0,15166027 | FALSE |
| Rv3405c | 98  | 21   | 2,222392421 | 0,223230639  | 0,8238613 | 0,4100184 | 0,481785311 | 0,10931006 | FALSE |
| Rv3406  | 25  | 2    | 3,64385619  | 1,644694408  | 2,3963879 | 0,0165576 | 0,028281946 | 0,00641556 | FALSE |
| Rv3410c | 476 | 105  | 2,180572246 | 0,181410464  | 1,4864316 | 0,137165  | 0,187709478 | 0,04259489 | FALSE |
| Rv3415c | 26  | 11   | 1,2410081   | -0,758153682 | -1,708365 | 0,0875687 | 0,126347488 | 0,02866543 | FALSE |
| Rv3417c | 307 | 85   | 1,852703909 | -0,146457873 | -1,020047 | 0,3077063 | 0,378066547 | 0,08579056 | FALSE |
| Rv3419c | 204 | 70   | 1,543142325 | -0,456019457 | -2,731637 | 0,0063021 | 0,011966934 | 0,00271553 | FALSE |
| Rv3421c | 52  | 15   | 1,793549123 | -0,205612659 | -0,595399 | 0,5515768 | 0,621370704 | 0,14100095 | FALSE |
| Rv3422c | 144 | 23   | 2,646363045 | 0,647201264  | 2,6903201 | 0,0071384 | 0,013368308 | 0,00303353 | FALSE |
| Rv3426  | 53  | 6    | 3,142957954 | 1,143796172  | 2,6465951 | 0,0081307 | 0,015012799 | 0,00340669 | FALSE |
| Rv3427c | 84  | 10   | 3,070389328 | 1,071227546  | 3,1599952 | 0,0015777 | 0,003335576 | 0,0007567  | FALSE |
| Rv3428c | 13  | 1    | 3,700439718 | 1,701277936  | 1,7700667 | 0,076716  | 0,112228491 | 0,02544792 | FALSE |
| Rv3431c | 74  | 30   | 1,30256277  | -0,696599012 | -2,620056 | 0,0087915 | 0,016127371 | 0,00365961 | FALSE |
| Rv3433c | 68  | 23   | 1,563900885 | -0,435260897 | -1,499845 | 0,1336546 | 0,183638272 | 0,04166379 | FALSE |
| Rv3438  | 145 | 25   | 2,5360529   | 0,536891118  | 2,2827371 | 0,0224459 | 0,037384484 | 0,00848326 | FALSE |
| Rv3440c | 37  | 13   | 1,509013647 | -0,490148134 | -1,257757 | 0,2084797 | 0,27109917  | 0,06151761 | FALSE |
| Rv3444c | 9   | 2    | 2,169925001 | 0,17076322   | 0,1927264 | 0,8471733 | 0,877083966 | 0,19894886 | FALSE |
| Rv3445c | 54  | 16   | 1,754887502 | -0,24427428  | -0,725673 | 0,4680391 | 0,541253794 | 0,12280288 | FALSE |
| Rv3446c | 5   | 2    | 1,321928095 | -0,677233687 | -0,659883 | 0,5093289 | 0,580911835 | 0,13174386 | FALSE |
| Rv3448  | 18  | 4    | 2,169925001 | 0,17076322   | 0,2725569 | 0,7851938 | 0,826475709 | 0,18754321 | FALSE |
| Rv3449  | 3   | 0 NA | NA          | NA           | NA        | NA        | NA          | NA         | FALSE |
| Rv3450c | 103 | 39   | 1,401098308 | -0,598063474 | -2,608953 | 0,009082  | 0,016613786 | 0,00376999 | FALSE |
| Rv3451  | 170 | 27   | 2,654503434 | 0,655341652  | 2,9557351 | 0,0031192 | 0,006278293 | 0,0014243  | FALSE |

|         |      |     |             |              |           |           |             |            |       |
|---------|------|-----|-------------|--------------|-----------|-----------|-------------|------------|-------|
| Rv3453  | 8    | 1   | 3           | 1,000838218  | 0,9222841 | 0,3563804 | 0,429901931 | 0,09741892 | FALSE |
| Rv3455c | 316  | 102 | 1,631355406 | -0,367806376 | -2,700621 | 0,006921  | 0,013010729 | 0,00295238 | FALSE |
| Rv3457c | 1343 | 314 | 2,096622841 | 0,097461059  | 1,3613589 | 0,1734003 | 0,231827396 | 0,05258096 | FALSE |
| Rv3458c | 1209 | 311 | 1,958827759 | -0,040334023 | -0,547456 | 0,5840655 | 0,651641935 | 0,14787007 | FALSE |
| Rv3462c | 1303 | 282 | 2,208070016 | 0,208908234  | 2,8192475 | 0,0048136 | 0,009320073 | 0,0021149  | FALSE |
| Rv3463  | 56   | 9   | 2,637429921 | 0,638268139  | 1,6570822 | 0,0975029 | 0,139027948 | 0,03154811 | FALSE |
| Rv3466  | 111  | 24  | 2,209453366 | 0,210291584  | 0,8278392 | 0,4077616 | 0,479633661 | 0,10883809 | FALSE |
| Rv3467  | 14   | 0   | 4,807354922 | 2,80819314   | 2,5028209 | 0,0123208 | 0,021780899 | 0,00494029 | FALSE |
| Rv3468c | 11   | 5   | 1,137503524 | -0,861658258 | -1,285746 | 0,1985317 | 0,259274505 | 0,05883437 | FALSE |
| Rv3469c | 22   | 8   | 1,459431619 | -0,539730163 | -1,077174 | 0,2814026 | 0,350111004 | 0,07943841 | FALSE |
| Rv3470c | 20   | 11  | 0,862496476 | -1,136665306 | -2,398665 | 0,016455  | 0,02813106  | 0,00638238 | FALSE |
| Rv3471c | 6    | 2   | 1,584962501 | -0,414199281 | -0,422409 | 0,6727265 | 0,731623716 | 0,16595083 | FALSE |
| Rv3473c | 6    | 1   | 2,584962501 | 0,585800719  | 0,502361  | 0,6154136 | 0,680171264 | 0,15423587 | FALSE |
| Rv3474  | 57   | 10  | 2,510961919 | 0,511800137  | 1,3702591 | 0,170606  | 0,228478828 | 0,05184624 | FALSE |
| Rv3482c | 191  | 31  | 2,623232518 | 0,624070736  | 2,9997113 | 0,0027024 | 0,005482559 | 0,0012441  | FALSE |
| Rv3483c | 332  | 86  | 1,948774677 | -0,050387105 | -0,358921 | 0,7196545 | 0,770235331 | 0,17478119 | FALSE |
| Rv3484  | 427  | 82  | 2,380540255 | 0,381378473  | 2,8588478 | 0,0042518 | 0,00829748  | 0,00188286 | FALSE |
| Rv3486  | 24   | 3   | 3           | 1,000838218  | 1,5974481 | 0,1101659 | 0,155537553 | 0,03527552 | FALSE |
| Rv3488  | 32   | 7   | 2,192645078 | 0,193483296  | 0,4101445 | 0,6817    | 0,737923622 | 0,16742607 | FALSE |
| Rv3490  | 1716 | 371 | 2,209558461 | 0,210396679  | 3,2579089 | 0,0011224 | 0,002426867 | 0,0005507  | FALSE |
| Rv3492c | 191  | 43  | 2,151164073 | 0,152002291  | 0,7929136 | 0,4278281 | 0,501144703 | 0,11371936 | FALSE |
| Rv3493c | 89   | 26  | 1,775293713 | -0,223868069 | -0,850791 | 0,3948857 | 0,466995288 | 0,1059702  | FALSE |
| Rv3494c | 375  | 99  | 1,921390165 | -0,077771617 | -0,59158  | 0,5541318 | 0,623714562 | 0,14148932 | FALSE |
| Rv3495c | 555  | 152 | 1,868416448 | -0,130745334 | -1,221126 | 0,2220382 | 0,286463378 | 0,06500404 | FALSE |
| Rv3496c | 399  | 91  | 2,132450296 | 0,133288514  | 1,0082578 | 0,3133307 | 0,384020006 | 0,08714152 | FALSE |
| Rv3497c | 232  | 57  | 2,025090981 | 0,025929199  | 0,1523653 | 0,8788988 | 0,902937438 | 0,20489385 | FALSE |
| Rv3499c | 347  | 63  | 2,461511929 | 0,462350147  | 3,0807263 | 0,002065  | 0,004270696 | 0,0009691  | FALSE |
| Rv3504  | 75   | 10  | 2,906890596 | 0,907728814  | 2,6028906 | 0,0092441 | 0,016855713 | 0,00382489 | FALSE |
| Rv3505  | 153  | 32  | 2,257387843 | 0,258226061  | 1,1836016 | 0,2365708 | 0,302442543 | 0,06863002 | FALSE |
| Rv3506  | 29   | 5   | 2,5360529   | 0,536891118  | 1,0208428 | 0,3073289 | 0,377720575 | 0,08571205 | FALSE |
| Rv3507  | 163  | 28  | 2,541373232 | 0,54221145   | 2,4420222 | 0,0146052 | 0,025398189 | 0,00576334 | FALSE |
| Rv3511  | 48   | 16  | 1,584962501 | -0,414199281 | -1,19477  | 0,232177  | 0,297548713 | 0,06750855 | FALSE |
| Rv3512  | 65   | 8   | 3,022367813 | 1,023206031  | 2,6773013 | 0,0074218 | 0,013833421 | 0,00313907 | FALSE |
| Rv3513c | 41   | 5   | 3,03562391  | 1,036462128  | 2,1489342 | 0,0316396 | 0,051152555 | 0,01160512 | FALSE |
| Rv3514  | 294  | 87  | 1,756728849 | -0,242432933 | -1,680064 | 0,0929448 | 0,13315451  | 0,03021532 | FALSE |
| Rv3515c | 62   | 17  | 1,866733469 | -0,132428313 | -0,413454 | 0,6792743 | 0,736814625 | 0,16715256 | FALSE |
| Rv3517  | 25   | 5   | 2,321928095 | 0,322766313  | 0,5913521 | 0,5542845 | 0,623619523 | 0,14148932 | FALSE |

|         |     |     |             |              |           |           |             |            |       |
|---------|-----|-----|-------------|--------------|-----------|-----------|-------------|------------|-------|
| Rv3522  | 49  | 7   | 2,807354922 | 0,80819314   | 1,905772  | 0,0566798 | 0,086210988 | 0,01956293 | FALSE |
| Rv3525c | 63  | 19  | 1,72935241  | -0,269809372 | -0,869595 | 0,384522  | 0,456518565 | 0,10359283 | FALSE |
| Rv3526  | 555 | 114 | 2,283453947 | 0,284292165  | 2,4708984 | 0,0134774 | 0,023645421 | 0,0053656  | FALSE |
| Rv3527  | 28  | 2   | 3,807354922 | 1,80819314   | 2,7103247 | 0,0067217 | 0,012684465 | 0,00287534 | FALSE |
| Rv3529c | 82  | 16  | 2,357552005 | 0,358390223  | 1,1818879 | 0,2372502 | 0,303212794 | 0,06880481 | FALSE |
| Rv3530c | 28  | 3   | 3,222392421 | 1,223230639  | 2,0291217 | 0,0424459 | 0,066735748 | 0,01513457 | FALSE |
| Rv3532  | 143 | 37  | 1,950417971 | -0,048743811 | -0,227798 | 0,8198034 | 0,85514531  | 0,1940489  | FALSE |
| Rv3534c | 109 | 18  | 2,598259323 | 0,599097541  | 2,1847965 | 0,0289038 | 0,047125453 | 0,01069367 | FALSE |
| Rv3535c | 196 | 34  | 2,527247003 | 0,528085221  | 2,6144829 | 0,0089363 | 0,016362407 | 0,00371294 | FALSE |
| Rv3537  | 59  | 22  | 1,423211431 | -0,575950351 | -1,894263 | 0,0581901 | 0,088202002 | 0,02001473 | FALSE |
| Rv3538  | 41  | 7   | 2,550197083 | 0,551035301  | 1,2427442 | 0,2139621 | 0,277405163 | 0,06292787 | FALSE |
| Rv3540c | 126 | 23  | 2,453717967 | 0,454556186  | 1,8274826 | 0,0676272 | 0,100516985 | 0,02280006 | FALSE |
| Rv3541c | 46  | 15  | 1,61667136  | -0,382490421 | -1,074155 | 0,2827531 | 0,351347936 | 0,0797276  | FALSE |
| Rv3542c | 72  | 25  | 1,526068812 | -0,47309297  | -1,688507 | 0,091314  | 0,1311277   | 0,02974998 | FALSE |
| Rv3543c | 110 | 29  | 1,923378718 | -0,075783063 | -0,312077 | 0,7549821 | 0,801520706 | 0,18188044 | FALSE |
| Rv3544c | 156 | 33  | 2,2410081   | 0,241846318  | 1,1225215 | 0,2616408 | 0,328634119 | 0,07455359 | FALSE |
| Rv3545c | 229 | 39  | 2,553801569 | 0,554639787  | 2,9545225 | 0,0031315 | 0,006291781 | 0,00142773 | FALSE |
| Rv3546  | 98  | 19  | 2,366782331 | 0,367620549  | 1,3232232 | 0,1857612 | 0,244580868 | 0,05549083 | FALSE |
| Rv3547  | 223 | 47  | 2,246311048 | 0,247149266  | 1,3702924 | 0,1705957 | 0,228542552 | 0,05184624 | FALSE |
| Rv3548c | 222 | 56  | 1,987060944 | -0,012100838 | -0,070017 | 0,9441798 | 0,956794724 | 0,2171151  | FALSE |
| Rv3550  | 56  | 17  | 1,719892081 | -0,279269701 | -0,849999 | 0,3953257 | 0,467375419 | 0,10605646 | FALSE |
| Rv3552  | 32  | 3   | 3,415037499 | 1,415875717  | 2,4284156 | 0,015165  | 0,02627304  | 0,00596055 | FALSE |
| Rv3553  | 58  | 9   | 2,688055994 | 0,688894212  | 1,8042782 | 0,0711877 | 0,105056805 | 0,02383495 | FALSE |
| Rv3555c | 32  | 12  | 1,415037499 | -0,584124283 | -1,416839 | 0,1565299 | 0,211422601 | 0,04797585 | FALSE |
| Rv3559c | 40  | 10  | 2           | 0,000838218  | 0,002054  | 0,9983611 | 1           | 0,22680161 | FALSE |
| Rv3560c | 54  | 5   | 3,432959407 | 1,433797625  | 3,1846414 | 0,0014493 | 0,003081497 | 0,00069925 | FALSE |
| Rv3561  | 42  | 16  | 1,392317423 | -0,606844359 | -1,692987 | 0,0904579 | 0,129969312 | 0,02949253 | FALSE |
| Rv3562  | 84  | 17  | 2,304854582 | 0,3056928    | 1,0296849 | 0,303158  | 0,373700568 | 0,08478659 | FALSE |
| Rv3563  | 26  | 4   | 2,700439718 | 0,701277936  | 1,2270964 | 0,2197864 | 0,284022735 | 0,06441693 | FALSE |
| Rv3564  | 43  | 17  | 1,338801913 | -0,660359868 | -1,881457 | 0,0599097 | 0,090495565 | 0,02053518 | FALSE |
| Rv3565  | 52  | 8   | 2,700439718 | 0,701277936  | 1,7353866 | 0,0826724 | 0,120250699 | 0,02728216 | FALSE |
| Rv3567c | 82  | 13  | 2,657112286 | 0,657950505  | 2,0600052 | 0,039398  | 0,062278911 | 0,01413228 | FALSE |
| Rv3568c | 397 | 78  | 2,347592978 | 0,348431196  | 2,5328528 | 0,0113138 | 0,020200004 | 0,00458377 | FALSE |
| Rv3573c | 79  | 11  | 2,84434913  | 0,845187348  | 2,5144496 | 0,0119218 | 0,021175284 | 0,004804   | FALSE |
| Rv3574  | 67  | 15  | 2,159198595 | 0,160036813  | 0,4937385 | 0,6214909 | 0,685160053 | 0,15545425 | FALSE |
| Rv3575c | 162 | 46  | 1,816288047 | -0,182873735 | -0,931041 | 0,3518324 | 0,425456694 | 0,0965295  | FALSE |
| Rv3577  | 158 | 28  | 2,496425826 | 0,497264044  | 2,22221   | 0,0262691 | 0,04318691  | 0,00979994 | FALSE |

|         |     |     |             |              |           |           |             |            |       |
|---------|-----|-----|-------------|--------------|-----------|-----------|-------------|------------|-------|
| Rv3578  | 45  | 14  | 1,684498174 | -0,314663608 | -0,863805 | 0,3876952 | 0,459663259 | 0,10429075 | FALSE |
| Rv3579c | 787 | 229 | 1,781016037 | -0,218145744 | -2,46339  | 0,013763  | 0,024092929 | 0,00546715 | FALSE |
| Rv3586  | 94  | 17  | 2,46712601  | 0,467964229  | 1,6212294 | 0,1049684 | 0,14899966  | 0,0338048  | FALSE |
| Rv3589  | 110 | 18  | 2,611434712 | 0,61227293   | 2,2379486 | 0,0252244 | 0,04166041  | 0,00945355 | FALSE |
| Rv3590c | 92  | 14  | 2,716207034 | 0,717045252  | 2,3537597 | 0,0185846 | 0,031525908 | 0,00715383 | FALSE |
| Rv3591c | 25  | 4   | 2,64385619  | 0,644694408  | 1,1170794 | 0,2639604 | 0,33091538  | 0,07509106 | FALSE |
| Rv3594  | 49  | 12  | 2,029747343 | 0,030585562  | 0,0825267 | 0,9342279 | 0,948659832 | 0,21526914 | FALSE |
| Rv3595c | 141 | 46  | 1,615989396 | -0,383172386 | -1,88424  | 0,0595325 | 0,089960263 | 0,02041371 | FALSE |
| Rv3598c | 939 | 261 | 1,847075351 | -0,152086431 | -1,854678 | 0,0636423 | 0,095511826 | 0,02166269 | FALSE |
| Rv3599c | 4   | 1   | 2           | 0,000838218  | 0,0006495 | 0,9994817 | 0,999862021 | 0,22680161 | FALSE |
| Rv3600c | 199 | 62  | 1,68242831  | -0,316733472 | -1,829197 | 0,0673701 | 0,100304827 | 0,02276109 | FALSE |
| Rv3601c | 198 | 42  | 2,237039197 | 0,237877415  | 1,2447504 | 0,2132235 | 0,276629467 | 0,06277254 | FALSE |
| Rv3602c | 98  | 36  | 1,444784843 | -0,554376939 | -2,341153 | 0,0192243 | 0,032499188 | 0,00737469 | FALSE |
| Rv3603c | 338 | 64  | 2,400879436 | 0,401717654  | 2,6696818 | 0,0075923 | 0,014124574 | 0,00320514 | FALSE |
| Rv3605c | 386 | 113 | 1,772278075 | -0,226883707 | -1,796799 | 0,0723675 | 0,106618331 | 0,0241712  | FALSE |
| Rv3606c | 168 | 28  | 2,584962501 | 0,585800719  | 2,658346  | 0,0078525 | 0,0145469   | 0,00330097 | FALSE |
| Rv3612c | 317 | 82  | 1,950787026 | -0,048374756 | -0,336593 | 0,7364238 | 0,78477583  | 0,17808071 | FALSE |
| Rv3617  | 173 | 62  | 1,480431917 | -0,518729865 | -2,892706 | 0,0038194 | 0,007535608 | 0,00170997 | FALSE |
| Rv3618  | 82  | 32  | 1,357552005 | -0,641609777 | -2,516242 | 0,0118614 | 0,021082143 | 0,00478394 | FALSE |
| Rv3619c | 101 | 15  | 2,751320887 | 0,752159105  | 2,5712851 | 0,0101322 | 0,01826387  | 0,00414442 | FALSE |
| Rv3620c | 91  | 11  | 3,048363022 | 1,04920124   | 3,2337233 | 0,0012219 | 0,002623346 | 0,00059529 | FALSE |
| Rv3621c | 20  | 2   | 3,321928095 | 1,322766313  | 1,8227509 | 0,0683411 | 0,101329842 | 0,02298505 | FALSE |
| Rv3622c | 2   | 1   | 1           | -0,999161782 | -0,65106  | 0,5150075 | 0,58645576  | 0,13305887 | FALSE |
| Rv3623  | 112 | 36  | 1,637429921 | -0,361731861 | -1,579466 | 0,1142291 | 0,160213233 | 0,03635546 | FALSE |
| Rv3625c | 160 | 40  | 2           | 0,000838218  | 0,0041082 | 0,9967222 | 1           | 0,22680161 | FALSE |
| Rv3626c | 353 | 65  | 2,44115656  | 0,441994778  | 2,9809498 | 0,0028736 | 0,005811957 | 0,00131884 | FALSE |
| Rv3627c | 387 | 70  | 2,466906739 | 0,467744957  | 3,2883661 | 0,0010077 | 0,002201882 | 0,00049965 | FALSE |
| Rv3629c | 244 | 42  | 2,538419915 | 0,539258133  | 2,9730994 | 0,0029481 | 0,005956591 | 0,00135166 | FALSE |
| Rv3630  | 211 | 35  | 2,591816172 | 0,59265439   | 3,0104973 | 0,0026082 | 0,00532165  | 0,00120758 | FALSE |
| Rv3631  | 164 | 29  | 2,499571009 | 0,500409228  | 2,2770924 | 0,0227807 | 0,037862253 | 0,00859167 | FALSE |
| Rv3633  | 666 | 131 | 2,345955366 | 0,346793584  | 3,2663216 | 0,0010895 | 0,002361079 | 0,00053577 | FALSE |
| Rv3635  | 101 | 19  | 2,410283969 | 0,411122187  | 1,4910021 | 0,135961  | 0,186255649 | 0,04226498 | FALSE |
| Rv3637  | 2   | 0   | NA          | NA           | NA        | NA        | NA          | NA         | FALSE |
| Rv3638  | 2   | 0   | NA          | NA           | NA        | NA        | NA          | NA         | FALSE |
| Rv3639c | 5   | 3   | 0,736965594 | -1,262196188 | -1,361063 | 0,1734937 | 0,2317559   | 0,05258096 | FALSE |
| Rv3640c | 9   | 2   | 2,169925001 | 0,17076322   | 0,1927264 | 0,8471733 | 0,877083966 | 0,19894886 | FALSE |
| Rv3641c | 86  | 11  | 2,966833136 | 0,967671354  | 2,9406002 | 0,0032758 | 0,006558191 | 0,00148818 | FALSE |

|         |      |      |             |              |           |           |             |            |       |       |
|---------|------|------|-------------|--------------|-----------|-----------|-------------|------------|-------|-------|
| Rv3643  | NA   | NA   | NA          | NA           | NA        | NA        | NA          | NA         | NA    | FALSE |
| Rv3644c | 135  | 50   | 1,432959407 | -0,566202375 | -2,812197 | 0,0049204 | 0,009517496 | 0,0021597  | FALSE |       |
| Rv3648c | 4931 | 1248 | 1,982262319 | -0,016899463 | -0,461859 | 0,6441826 | 0,705737832 | 0,16014547 | FALSE |       |
| Rv3649  | 91   | 31   | 1,55359833  | -0,445563452 | -1,779308 | 0,0751892 | 0,110199268 | 0,02500157 | FALSE |       |
| Rv3650  | 5    | 1    | 2,321928095 | 0,322766313  | 0,2644593 | 0,791426  | 0,831371461 | 0,18857881 | FALSE |       |
| Rv3652  | 20   | 7    | 1,514573173 | -0,484588609 | -0,913347 | 0,3610601 | 0,433228162 | 0,09830779 | FALSE |       |
| Rv3653  | 12   | 8    | 0,584962501 | -1,414199281 | -2,42554  | 0,0152856 | 0,026458845 | 0,0060027  | FALSE |       |
| Rv3654c | 8    | 1    | 3           | 1,000838218  | 0,9222841 | 0,3563804 | 0,429901931 | 0,09741892 | FALSE |       |
| Rv3656c | 13   | 3    | 2,115477217 | 0,116315436  | 0,1592695 | 0,8734565 | 0,89816518  | 0,20378437 | FALSE |       |
| Rv3657c | 9    | 4    | 1,169925001 | -0,82923678  | -1,11297  | 0,2657215 | 0,33275298  | 0,0754721  | FALSE |       |
| Rv3659c | 25   | 12   | 1,058893689 | -0,940268093 | -2,144193 | 0,0320174 | 0,051646862 | 0,01171966 | FALSE |       |
| Rv3662c | 70   | 15   | 2,222392421 | 0,223230639  | 0,6962847 | 0,4862505 | 0,558710024 | 0,12676357 | FALSE |       |
| Rv3663c | 91   | 27   | 1,752907138 | -0,246254644 | -0,950005 | 0,3421099 | 0,415227377 | 0,09420857 | FALSE |       |
| Rv3664c | 82   | 22   | 1,898120386 | -0,101041396 | -0,360825 | 0,7182302 | 0,76891964  | 0,17448264 | FALSE |       |
| Rv3666c | 105  | 26   | 2,0138058   | 0,014644018  | 0,0580018 | 0,9537472 | 0,96549766  | 0,21908997 | FALSE |       |
| Rv3668c | 136  | 23   | 2,563900885 | 0,564739103  | 2,3142281 | 0,0206552 | 0,034584659 | 0,00784626 | FALSE |       |
| Rv3669  | 214  | 40   | 2,419538892 | 0,42037711   | 2,2156863 | 0,026713  | 0,043788885 | 0,00993654 | FALSE |       |
| Rv3670  | 73   | 8    | 3,189824559 | 1,190662777  | 3,2071972 | 0,0013404 | 0,0028629   | 0,00064947 | FALSE |       |
| Rv3671c | 392  | 80   | 2,292781749 | 0,293619967  | 2,1411718 | 0,0322602 | 0,051932315 | 0,01178444 | FALSE |       |
| Rv3682  | 1215 | 344  | 1,820475844 | -0,178685938 | -2,490367 | 0,0127611 | 0,022458645 | 0,0050963  | FALSE |       |
| Rv3685c | 387  | 89   | 2,120456325 | 0,121294543  | 0,9055044 | 0,3651982 | 0,436335016 | 0,0990128  | FALSE |       |
| Rv3687c | 182  | 54   | 1,752907138 | -0,246254644 | -1,343548 | 0,1790946 | 0,237468241 | 0,05387705 | FALSE |       |
| Rv3688c | 215  | 64   | 1,74819285  | -0,250968932 | -1,489469 | 0,1363639 | 0,186742718 | 0,04237551 | FALSE |       |
| Rv3689  | 431  | 83   | 2,376504628 | 0,377342846  | 2,8438055 | 0,0044578 | 0,008665186 | 0,0019663  | FALSE |       |
| Rv3690  | 111  | 22   | 2,334984248 | 0,335822466  | 1,2935587 | 0,1958179 | 0,256494774 | 0,05820359 | FALSE |       |
| Rv3691  | 216  | 39   | 2,469485283 | 0,470323501  | 2,4690327 | 0,0135479 | 0,023726841 | 0,00538408 | FALSE |       |
| Rv3692  | 244  | 64   | 1,930737338 | -0,068424444 | -0,419143 | 0,6751114 | 0,733105498 | 0,16632761 | FALSE |       |
| Rv3693  | 189  | 38   | 2,314314911 | 0,315153129  | 1,5897608 | 0,1118887 | 0,157546994 | 0,03575044 | FALSE |       |
| Rv3695  | 239  | 52   | 2,20042709  | 0,201265308  | 1,1644604 | 0,2442375 | 0,311436328 | 0,07067089 | FALSE |       |
| Rv3697A | 51   | 7    | 2,86507042  | 0,865908638  | 2,0623932 | 0,0391703 | 0,062055718 | 0,01407623 | FALSE |       |
| Rv3697c | 98   | 13   | 2,914270126 | 0,915108344  | 2,9957214 | 0,002738  | 0,005546241 | 0,00125855 | FALSE |       |
| Rv3698  | 80   | 21   | 1,929610672 | -0,06955111  | -0,243988 | 0,8072398 | 0,844721052 | 0,19168343 | FALSE |       |
| Rv3700c | 64   | 29   | 1,142019005 | -0,857142777 | -3,082734 | 0,0020511 | 0,004246443 | 0,0009636  | FALSE |       |
| Rv3702c | 147  | 45   | 1,707819249 | -0,291342533 | -1,439741 | 0,1499407 | 0,203358414 | 0,04614593 | FALSE |       |
| Rv3705A | 74   | 12   | 2,624490865 | 0,625329083  | 1,8704536 | 0,0614208 | 0,092459478 | 0,02097283 | FALSE |       |
| Rv3706c | 30   | 3    | 3,321928095 | 1,322766313  | 2,2324089 | 0,0255879 | 0,042181344 | 0,00956576 | FALSE |       |
| Rv3707c | 98   | 37   | 1,405256478 | -0,593905303 | -2,525322 | 0,0115592 | 0,020600793 | 0,00467472 | FALSE |       |



|         |      |     |             |              |           |           |             |            |       |
|---------|------|-----|-------------|--------------|-----------|-----------|-------------|------------|-------|
| Rv3712  | 66   | 14  | 2,237039197 | 0,237877415  | 0,7186318 | 0,4723678 | 0,545220561 | 0,12372102 | FALSE |
| Rv3714c | 79   | 10  | 2,981852653 | 0,982690871  | 2,854686  | 0,0043079 | 0,008390377 | 0,001903   | FALSE |
| Rv3716c | 239  | 50  | 2,257010618 | 0,257848836  | 1,4772776 | 0,1396012 | 0,190646562 | 0,04326137 | FALSE |
| Rv3717  | 250  | 74  | 1,756330919 | -0,242830863 | -1,551881 | 0,1206907 | 0,168318238 | 0,03819464 | FALSE |
| Rv3718c | 71   | 9   | 2,979822118 | 0,980660336  | 2,7016418 | 0,0068998 | 0,012980123 | 0,00294474 | FALSE |
| Rv3721c | 555  | 137 | 2,018311878 | 0,019150096  | 0,1742693 | 0,8616538 | 0,888460813 | 0,20159015 | FALSE |
| Rv3724B | 67   | 13  | 2,365649472 | 0,36648769   | 1,0909352 | 0,2753014 | 0,343115432 | 0,07784718 | FALSE |
| Rv3726  | 637  | 196 | 1,700439718 | -0,298722064 | -3,077387 | 0,0020882 | 0,004312044 | 0,00097849 | FALSE |
| Rv3727  | 73   | 8   | 3,189824559 | 1,190662777  | 3,2071972 | 0,0013404 | 0,0028629   | 0,00064947 | FALSE |
| Rv3728  | 109  | 35  | 1,638901308 | -0,360260474 | -1,551434 | 0,1207977 | 0,168407957 | 0,03819582 | FALSE |
| Rv3730c | 113  | 20  | 2,498250868 | 0,499089086  | 1,8855788 | 0,0593517 | 0,089738633 | 0,02035952 | FALSE |
| Rv3731  | 141  | 23  | 2,615989396 | 0,616827614  | 2,5506003 | 0,0107538 | 0,019278552 | 0,00437467 | FALSE |
| Rv3738c | 29   | 6   | 2,273018494 | 0,273856713  | 0,5449939 | 0,5857577 | 0,652606912 | 0,14804722 | FALSE |
| Rv3739c | 25   | 6   | 2,058893689 | 0,059731907  | 0,1145407 | 0,9088092 | 0,928466101 | 0,21065951 | FALSE |
| Rv3741c | 41   | 6   | 2,772589504 | 0,773427722  | 1,6783598 | 0,0932769 | 0,133533228 | 0,03030125 | FALSE |
| Rv3742c | 12   | 3   | 2           | 0,000838218  | 0,001125  | 0,9991024 | 1           | 0,22680161 | FALSE |
| Rv3743c | 39   | 17  | 1,197939378 | -0,801222404 | -2,227745 | 0,0258975 | 0,042611499 | 0,00966937 | FALSE |
| Rv3744  | 84   | 33  | 1,347923303 | -0,651238478 | -2,589281 | 0,0096177 | 0,017464117 | 0,00396294 | FALSE |
| Rv3745c | NA   | NA  | NA          | NA           | NA        | NA        | NA          | NA         | FALSE |
| Rv3746c | 50   | 23  | 1,120294234 | -0,878867548 | -2,804361 | 0,0050416 | 0,009723328 | 0,00220641 | FALSE |
| Rv3751  | 9    | 0   | 4,169925001 | 2,17076322   | 1,7323823 | 0,0832055 | 0,12075899  | 0,02738742 | FALSE |
| Rv3752c | 37   | 19  | 0,961525852 | -1,03763593  | -2,927643 | 0,0034154 | 0,006817016 | 0,00154691 | FALSE |
| Rv3753c | 235  | 59  | 1,993873897 | -0,005287885 | -0,031443 | 0,9749165 | 0,983142627 | 0,22309395 | FALSE |
| Rv3754  | 88   | 11  | 3           | 1,000838218  | 3,0589201 | 0,0022214 | 0,004574966 | 0,00103812 | FALSE |
| Rv3756c | 244  | 83  | 1,555697906 | -0,443463876 | -2,898935 | 0,0037443 | 0,007406032 | 0,00168057 | FALSE |
| Rv3757c | 153  | 54  | 1,502500341 | -0,496661441 | -2,59467  | 0,0094682 | 0,017208531 | 0,00390495 | FALSE |
| Rv3758c | 161  | 55  | 1,549557165 | -0,449604617 | -2,389896 | 0,0168531 | 0,028737025 | 0,00652098 | FALSE |
| Rv3760  | 30   | 3   | 3,321928095 | 1,322766313  | 2,2324089 | 0,0255879 | 0,042181344 | 0,00956576 | FALSE |
| Rv3764c | 138  | 34  | 2,021061616 | 0,021899834  | 0,0993173 | 0,9208863 | 0,938737559 | 0,21301758 | FALSE |
| Rv3766  | 116  | 21  | 2,465663572 | 0,46650179   | 1,7958192 | 0,0725233 | 0,106668586 | 0,02420064 | FALSE |
| Rv3768  | 84   | 10  | 3,070389328 | 1,071227546  | 3,1599952 | 0,0015777 | 0,003335576 | 0,0007567  | FALSE |
| Rv3769  | 291  | 50  | 2,541019153 | 0,541857371  | 3,261058  | 0,00111   | 0,002402708 | 0,00054522 | FALSE |
| Rv3770A | 3    | 2   | 0,584962501 | -1,414199281 | -1,212765 | 0,2252197 | 0,289715063 | 0,06572048 | FALSE |
| Rv3770B | 84   | 36  | 1,222392421 | -0,776769361 | -3,156305 | 0,0015978 | 0,003371748 | 0,00076501 | FALSE |
| Rv3770c | 49   | 10  | 2,292781749 | 0,293619967  | 0,756951  | 0,4490792 | 0,522776988 | 0,11862814 | FALSE |
| Rv3772  | 87   | 17  | 2,355480655 | 0,356318873  | 1,210788  | 0,2259767 | 0,290499331 | 0,06591988 | FALSE |
| Rv3774  | 1170 | 277 | 2,078550648 | 0,079388867  | 1,0382359 | 0,2991602 | 0,369292008 | 0,08379945 | FALSE |

|         |      |      |             |              |           |           |             |            |       |
|---------|------|------|-------------|--------------|-----------|-----------|-------------|------------|-------|
| Rv3775  | 296  | 71   | 2,059706246 | 0,060544464  | 0,3994623 | 0,6895526 | 0,744686565 | 0,16898369 | FALSE |
| Rv3776  | 51   | 10   | 2,350497247 | 0,351335465  | 0,9148456 | 0,3602727 | 0,432546567 | 0,09815312 | FALSE |
| Rv3777  | 181  | 32   | 2,499845887 | 0,500684105  | 2,3934128 | 0,0166925 | 0,028487678 | 0,0064644  | FALSE |
| Rv3785  | 194  | 34   | 2,512450001 | 0,513288219  | 2,5347165 | 0,0112538 | 0,02010196  | 0,00456152 | FALSE |
| Rv3786c | 117  | 21   | 2,478047297 | 0,478885515  | 1,8474514 | 0,0646818 | 0,096777249 | 0,02196062 | FALSE |
| Rv3787c | 38   | 4    | 3,247927513 | 1,248765732  | 2,4025508 | 0,0162812 | 0,027888359 | 0,00632703 | FALSE |
| Rv3788  | 103  | 15   | 2,779609932 | 0,78044815   | 2,6811038 | 0,007338  | 0,013703111 | 0,0031095  | FALSE |
| Rv3792  | 246  | 63   | 1,965234582 | -0,0339272   | -0,207432 | 0,8356725 | 0,868025389 | 0,19697163 | FALSE |
| Rv3793  | 334  | 94   | 1,829115441 | -0,170046341 | -1,240389 | 0,2148316 | 0,278075487 | 0,06310067 | FALSE |
| Rv3794  | 1057 | 273  | 1,95300252  | -0,046159261 | -0,586382 | 0,5576192 | 0,626924175 | 0,14226114 | FALSE |
| Rv3797  | 89   | 15   | 2,568842835 | 0,569681053  | 1,8868564 | 0,0591796 | 0,089529918 | 0,02031606 | FALSE |
| Rv3798  | 196  | 35   | 2,485426827 | 0,486265045  | 2,4249479 | 0,0153106 | 0,02647301  | 0,00600723 | FALSE |
| Rv3802c | 590  | 119  | 2,309753381 | 0,310591599  | 2,7706607 | 0,0055943 | 0,010726201 | 0,00243398 | FALSE |
| Rv3803c | 1158 | 261  | 2,149513541 | 0,15035176   | 1,9322394 | 0,05333   | 0,081587811 | 0,01851384 | FALSE |
| Rv3804c | 6895 | 1823 | 1,91923599  | -0,079925792 | -2,612963 | 0,0089761 | 0,01642773  | 0,00372777 | FALSE |
| Rv3807c | 570  | 179  | 1,671002332 | -0,32815945  | -3,214211 | 0,001308  | 0,00280222  | 0,00063588 | FALSE |
| Rv3814c | 314  | 84   | 1,902303326 | -0,096858456 | -0,676407 | 0,4987823 | 0,571527478 | 0,12969056 | FALSE |
| Rv3815c | 286  | 65   | 2,137503524 | 0,138341742  | 0,8851866 | 0,376056  | 0,4478155   | 0,10161794 | FALSE |
| Rv3816c | 275  | 63   | 2,126007885 | 0,126846103  | 0,7974546 | 0,425187  | 0,498495151 | 0,11311813 | FALSE |
| Rv3817  | 51   | 23   | 1,148863386 | -0,850298396 | -2,726667 | 0,0063978 | 0,012113671 | 0,00274882 | FALSE |
| Rv3821  | 288  | 68   | 2,08246216  | 0,083300378  | 0,539989  | 0,5892046 | 0,655891304 | 0,14883046 | FALSE |
| Rv3823c | 1811 | 512  | 1,822570831 | -0,176590951 | -3,004236 | 0,0026625 | 0,005404443 | 0,00122637 | FALSE |
| Rv3824c | 778  | 225  | 1,789845154 | -0,209316628 | -2,346532 | 0,018949  | 0,03210264  | 0,00728471 | FALSE |
| Rv3828c | 316  | 62   | 2,349584438 | 0,350422656  | 2,2718231 | 0,0230972 | 0,03827536  | 0,00868541 | FALSE |
| Rv3829c | 94   | 15   | 2,647698256 | 0,648536474  | 2,1775904 | 0,0294365 | 0,047826044 | 0,01085041 | FALSE |
| Rv3830c | 24   | 4    | 2,584962501 | 0,585800719  | 1,0047263 | 0,3150286 | 0,385861172 | 0,08753213 | FALSE |
| Rv3831  | 23   | 4    | 2,523561956 | 0,524400174  | 0,8898971 | 0,3735211 | 0,445200153 | 0,10102447 | FALSE |
| Rv3832c | 8    | 2    | 2           | 0,000838218  | 0,0009186 | 0,9992671 | 1           | 0,22680161 | FALSE |
| Rv3833  | 28   | 9    | 1,637429921 | -0,361731861 | -0,789712 | 0,4296962 | 0,503034126 | 0,11414811 | FALSE |
| Rv3838c | 90   | 36   | 1,321928095 | -0,677233687 | -2,799733 | 0,0051145 | 0,009854189 | 0,00223607 | FALSE |
| Rv3839  | 17   | 7    | 1,280107919 | -0,719053863 | -1,301303 | 0,1931547 | 0,253258651 | 0,05746925 | FALSE |
| Rv3840  | 5    | 2    | 1,321928095 | -0,677233687 | -0,659883 | 0,5093289 | 0,580911835 | 0,13174386 | FALSE |
| Rv3843c | 769  | 165  | 2,220517574 | 0,221355792  | 2,289603  | 0,0220443 | 0,03674678  | 0,00833855 | FALSE |
| Rv3844  | 24   | 5    | 2,263034406 | 0,263872624  | 0,4785419 | 0,6322645 | 0,694997572 | 0,15766436 | FALSE |
| Rv3845  | 5    | 3    | 0,736965594 | -1,262196188 | -1,361063 | 0,1734937 | 0,2317559   | 0,05258096 | FALSE |
| Rv3846  | 362  | 77   | 2,233059346 | 0,233897565  | 1,6561318 | 0,0976951 | 0,139251741 | 0,03159889 | FALSE |
| Rv3847  | 528  | 123  | 2,101879614 | 0,102717832  | 0,8986115 | 0,3688596 | 0,440309442 | 0,09991467 | FALSE |

|         |      |     |             |              |           |           |             |            |       |
|---------|------|-----|-------------|--------------|-----------|-----------|-------------|------------|-------|
| Rv3850  | 202  | 37  | 2,448758117 | 0,449596335  | 2,2906582 | 0,0219832 | 0,036660343 | 0,00831894 | FALSE |
| Rv3851  | 40   | 5   | 3           | 1,000838218  | 2,0623033 | 0,0391789 | 0,062031894 | 0,01407623 | FALSE |
| Rv3852  | 219  | 46  | 2,251225104 | 0,252063322  | 1,3837667 | 0,1664299 | 0,223721731 | 0,05076676 | FALSE |
| Rv3857c | 54   | 7   | 2,94753258  | 0,948370798  | 2,2913087 | 0,0219456 | 0,036613072 | 0,00830821 | FALSE |
| Rv3858c | 1517 | 417 | 1,863101797 | -0,136059985 | -2,103475 | 0,0354242 | 0,056586943 | 0,01284066 | FALSE |
| Rv3861  | 4    | 1   | 2           | 0,000838218  | 0,0006495 | 0,9994817 | 0,999862021 | 0,22680161 | FALSE |
| Rv3862c | 86   | 16  | 2,426264755 | 0,427102973  | 1,4253585 | 0,1540536 | 0,208399041 | 0,04728164 | FALSE |
| Rv3864  | 874  | 188 | 2,216900618 | 0,217738836  | 2,4026042 | 0,0162788 | 0,027902463 | 0,00632703 | FALSE |
| Rv3866  | 589  | 161 | 1,871206946 | -0,127954836 | -1,230543 | 0,218494  | 0,282630469 | 0,06411388 | FALSE |
| Rv3867  | 376  | 102 | 1,88216351  | -0,116998272 | -0,897228 | 0,369597  | 0,44105615  | 0,10008411 | FALSE |
| Rv3873  | 1130 | 245 | 2,205469118 | 0,206307336  | 2,5937914 | 0,0094924 | 0,017244609 | 0,00391313 | FALSE |
| Rv3877  | 1088 | 236 | 2,204819792 | 0,20565801   | 2,5373784 | 0,0111686 | 0,019976881 | 0,00453314 | FALSE |
| Rv3880c | 259  | 71  | 1,867061168 | -0,132100614 | -0,842958 | 0,399252  | 0,471169888 | 0,1069175  | FALSE |
| Rv3881c | 2117 | 596 | 1,828637034 | -0,170524748 | -3,133559 | 0,001727  | 0,003626885 | 0,00082301 | FALSE |
| Rv3882c | 881  | 242 | 1,864134972 | -0,13502681  | -1,590234 | 0,1117821 | 0,157453122 | 0,03572914 | FALSE |
| Rv3883c | 351  | 95  | 1,885471612 | -0,11369017  | -0,841887 | 0,3998511 | 0,4717358   | 0,10704591 | FALSE |
| Rv3886c | 203  | 55  | 1,883976204 | -0,115185578 | -0,648809 | 0,5164619 | 0,587518197 | 0,13331916 | FALSE |
| Rv3889c | 118  | 34  | 1,795180208 | -0,203981574 | -0,889559 | 0,3737029 | 0,445282204 | 0,10104309 | FALSE |
| Rv3892c | 36   | 18  | 1           | -0,999161782 | -2,762254 | 0,0057404 | 0,010963721 | 0,00248788 | FALSE |
| Rv3894c | 1245 | 364 | 1,774135387 | -0,225026395 | -3,200348 | 0,0013726 | 0,002926273 | 0,00066403 | FALSE |
| Rv3895c | 221  | 56  | 1,980547637 | -0,018614145 | -0,107583 | 0,9143265 | 0,933498235 | 0,21182868 | FALSE |
| Rv3896c | 180  | 38  | 2,243925583 | 0,244763801  | 1,2197183 | 0,2225717 | 0,286963968 | 0,06511764 | FALSE |
| Rv3899c | 109  | 16  | 2,768184325 | 0,769022543  | 2,7231011 | 0,0064672 | 0,01223345  | 0,002776   | FALSE |
| Rv3901c | 50   | 5   | 3,321928095 | 1,322766313  | 2,882038  | 0,0039511 | 0,007768304 | 0,00176278 | FALSE |
| Rv3903c | 320  | 69  | 2,213403638 | 0,214241856  | 1,4310964 | 0,1524026 | 0,20634255  | 0,04682309 | FALSE |
| Rv3904c | 83   | 30  | 1,468148836 | -0,531012946 | -2,055394 | 0,039841  | 0,062878281 | 0,01426829 | FALSE |
| Rv3908  | 242  | 73  | 1,729038678 | -0,270123103 | -1,706503 | 0,0879144 | 0,126776738 | 0,02876247 | FALSE |
| Rv3910  | 1128 | 253 | 2,156557778 | 0,157395996  | 1,9939412 | 0,0461585 | 0,072013073 | 0,01634115 | FALSE |
| Rv3911  | 39   | 10  | 1,963474124 | -0,035687658 | -0,086899 | 0,9307515 | 0,94573846  | 0,21457858 | FALSE |
| Rv3912  | 31   | 9   | 1,784271309 | -0,214890473 | -0,481227 | 0,6303551 | 0,69347858  | 0,15736361 | FALSE |
| Rv3913  | 345  | 86  | 2,004187797 | 0,005026015  | 0,0361471 | 0,971165  | 0,980362148 | 0,222463   | FALSE |
| Rv3914  | 79   | 27  | 1,548893246 | -0,450268536 | -1,676712 | 0,0935988 | 0,133945452 | 0,0303948  | FALSE |
| Rv3918c | 461  | 91  | 2,3408283   | 0,341666518  | 2,6795808 | 0,0073714 | 0,013759094 | 0,0031222  | FALSE |
| Rv3919c | 1099 | 234 | 2,231610951 | 0,232449169  | 2,8690351 | 0,0041173 | 0,008054799 | 0,00182779 | FALSE |

**(1) Benjamini Y & Hochberg Y.** "Controlling the false discovery rate: a practical and powerful approach to multiple testing". J. R. Stat. Soc. Ser. B 1995;57:289-300

**(2) Storey JD & Tibshirani R.** "Statistical significance for genomewide studies" Proc Natl Acad Sci U S A. 2003; 100(16):9440-5.

**Convention Description****DS (reads)** Read count mapping to sense strand of gene - Dextrose stationary**FS (reads)** Read count mapping to sense strand of gene - Fatty Acids stationary

Upper part: TRUE significant

Lower part: FALSE significant

**Table 1D. DEGseq Test in Stationary Phase of Growth**

| Gene Names | DS (reads) | FS (reads) | log2               |              |              | p-value  | q-value (1) | q-value (2) | Signature (p-value < 0,001) |
|------------|------------|------------|--------------------|--------------|--------------|----------|-------------|-------------|-----------------------------|
|            |            |            | log2 (Fold_change) | normalized   | z-score      |          |             |             |                             |
| Rv0001     | 98         | 4          | 4,614709844        | 4,124570404  | 9,060223635  | 1,30E-19 | 9,38E-19    | 2,29E-19    | TRUE                        |
| Rv0003     | 95         | 151        | -0,668549131       | -1,158688571 | -6,260832812 | 3,83E-10 | 1,66E-09    | 4,06E-10    | TRUE                        |
| Rv0005     | 235        | 363        | -0,627308791       | -1,117448231 | -9,430835746 | 4,07E-21 | 3,12E-20    | 7,63E-21    | TRUE                        |
| Rv0006     | 203        | 463        | -1,189532466       | -1,679671906 | -14,52380297 | 8,56E-48 | 1,42E-46    | 3,46E-47    | TRUE                        |
| Rv0007     | 60         | 91         | -0,600904045       | -1,091043485 | -4,630275159 | 3,65E-06 | 1,12E-05    | 2,73E-06    | TRUE                        |
| Rv0009     | 10         | 171        | -4,09592442        | -4,58606386  | -14,55924725 | 5,10E-48 | 8,55E-47    | 2,09E-47    | TRUE                        |
| Rv0014c    | 56         | 8          | 2,807354922        | 2,317215482  | 5,262902322  | 1,42E-07 | 5,02E-07    | 1,23E-07    | TRUE                        |
| Rv0015c    | 55         | 86         | -0,644905041       | -1,135044481 | -4,647207953 | 3,36E-06 | 1,04E-05    | 2,53E-06    | TRUE                        |
| Rv0016c    | 75         | 15         | 2,321928095        | 1,831788655  | 5,23732184   | 1,63E-07 | 5,74E-07    | 1,40E-07    | TRUE                        |
| Rv0017c    | 28         | 132        | -2,237039197       | -2,727178637 | -10,49799595 | 8,82E-26 | 8,03E-25    | 1,96E-25    | TRUE                        |
| Rv0019c    | 82         | 199        | -1,279072616       | -1,769212056 | -9,872814559 | 5,46E-23 | 4,57E-22    | 1,12E-22    | TRUE                        |
| Rv0021c    | 44         | 6          | 2,874469118        | 2,384329678  | 4,74464949   | 2,09E-06 | 6,60E-06    | 1,61E-06    | TRUE                        |
| Rv0023     | 52         | 9          | 2,530514717        | 2,040375277  | 4,685016681  | 2,80E-06 | 8,71E-06    | 2,13E-06    | TRUE                        |
| Rv0024     | 31         | 0          | 5,95419631         | 5,46405687   | 5,352154412  | 8,69E-08 | 3,13E-07    | 7,64E-08    | TRUE                        |
| Rv0026     | 41         | 123        | -1,584962501       | -2,075101941 | -8,633298829 | 5,96E-18 | 3,97E-17    | 9,71E-18    | TRUE                        |
| Rv0028     | 36         | 3          | 3,584962501        | 3,094823061  | 4,925219514  | 8,43E-07 | 2,78E-06    | 6,78E-07    | TRUE                        |
| Rv0029     | 37         | 177        | -2,258152184       | -2,748291624 | -12,20609567 | 2,88E-34 | 3,29E-33    | 8,05E-34    | TRUE                        |
| Rv0030     | 68         | 10         | 2,765534746        | 2,275395306  | 5,736222696  | 9,68E-09 | 3,78E-08    | 9,23E-09    | TRUE                        |
| Rv0035     | 1          | 11         | -3,459431619       | -3,949571059 | -3,550816934 | 0,000384 | 0,0009136   | 0,00022317  | TRUE                        |
| Rv0038     | 84         | 24         | 1,807354922        | 1,317215482  | 4,357436673  | 1,32E-05 | 3,75E-05    | 9,15E-06    | TRUE                        |
| Rv0039c    | 9          | 28         | -1,637429921       | -2,127569361 | -4,184759638 | 2,85E-05 | 7,81E-05    | 1,91E-05    | TRUE                        |
| Rv0041     | 95         | 134        | -0,496233582       | -0,986373022 | -5,172910328 | 2,30E-07 | 8,01E-07    | 1,96E-07    | TRUE                        |
| Rv0043c    | 45         | 77         | -0,774933444       | -1,265072884 | -4,791816571 | 1,65E-06 | 5,30E-06    | 1,29E-06    | TRUE                        |
| Rv0045c    | 124        | 12         | 3,36923381         | 2,87909437   | 8,827851039  | 1,07E-18 | 7,43E-18    | 1,81E-18    | TRUE                        |

|         |      |     |              |              |              |          |            |            |      |
|---------|------|-----|--------------|--------------|--------------|----------|------------|------------|------|
| Rv0047c | 458  | 238 | 0,944386025  | 0,454246585  | 4,076158686  | 4,58E-05 | 0,00012246 | 2,99E-05   | TRUE |
| Rv0048c | 8    | 58  | -2,857980995 | -3,348120435 | -7,671320803 | 1,70E-14 | 9,47E-14   | 2,31E-14   | TRUE |
| Rv0049  | 77   | 19  | 2,018859027  | 1,528719587  | 4,667529883  | 3,05E-06 | 9,42E-06   | 2,30E-06   | TRUE |
| Rv0058  | 33   | 185 | -2,486987341 | -2,977126781 | -12,9923441  | 1,35E-38 | 1,78E-37   | 4,34E-38   | TRUE |
| Rv0064  | 748  | 661 | 0,178387998  | -0,311751442 | -4,084375252 | 4,42E-05 | 0,00011845 | 2,89E-05   | TRUE |
| Rv0067c | 17   | 1   | 4,087462841  | 3,597323401  | 3,605971653  | 0,000311 | 0,00074802 | 0,00018273 | TRUE |
| Rv0070c | 52   | 5   | 3,378511623  | 2,888372183  | 5,725761782  | 1,03E-08 | 4,01E-08   | 9,81E-09   | TRUE |
| Rv0072  | 27   | 56  | -1,05246742  | -1,54260686  | -4,748885836 | 2,05E-06 | 6,48E-06   | 1,58E-06   | TRUE |
| Rv0073  | 22   | 191 | -3,117997209 | -3,608136649 | -14,34197267 | 1,20E-46 | 1,95E-45   | 4,78E-46   | TRUE |
| Rv0075  | 65   | 83  | -0,352671618 | -0,842811058 | -3,56610757  | 0,000362 | 0,00086642 | 0,00021172 | TRUE |
| Rv0076c | 205  | 3   | 6,094517599  | 5,604378159  | 13,77804089  | 3,46E-43 | 5,19E-42   | 1,27E-42   | TRUE |
| Rv0077c | 708  | 78  | 3,182203331  | 2,692063891  | 20,37825643  | 2,61E-92 | 8,35E-91   | 2,04E-91   | TRUE |
| Rv0078  | 92   | 5   | 4,201633861  | 3,711494421  | 8,485507076  | 2,15E-17 | 1,38E-16   | 3,38E-17   | TRUE |
| Rv0078A | 154  | 170 | -0,142604395 | -0,632743835 | -3,974040258 | 7,07E-05 | 0,00018445 | 4,51E-05   | TRUE |
| Rv0079  | 88   | 356 | -2,016301812 | -2,506441252 | -16,46495188 | 6,55E-61 | 1,33E-59   | 3,26E-60   | TRUE |
| Rv0080  | 8    | 133 | -4,055282436 | -4,545421876 | -12,81607075 | 1,33E-37 | 1,73E-36   | 4,22E-37   | TRUE |
| Rv0087  | 25   | 72  | -1,526068812 | -2,016208252 | -6,483415635 | 8,97E-11 | 4,05E-10   | 9,89E-11   | TRUE |
| Rv0092  | 34   | 72  | -1,08246216  | -1,5726016   | -5,461042459 | 4,73E-08 | 1,74E-07   | 4,25E-08   | TRUE |
| Rv0095c | 15   | 1   | 3,906890596  | 3,416751156  | 3,319453818  | 0,000902 | 0,00199607 | 0,00048679 | TRUE |
| Rv0097  | 5    | 62  | -3,632268215 | -4,122407656 | -8,539430504 | 1,35E-17 | 8,74E-17   | 2,13E-17   | TRUE |
| Rv0099  | 48   | 115 | -1,26052755  | -1,75066699  | -7,449979893 | 9,34E-14 | 4,98E-13   | 1,22E-13   | TRUE |
| Rv0100  | 7    | 33  | -2,237039197 | -2,727178637 | -5,248713752 | 1,53E-07 | 5,41E-07   | 1,32E-07   | TRUE |
| Rv0101  | 62   | 235 | -1,922320636 | -2,412460076 | -13,08626621 | 3,95E-39 | 5,29E-38   | 1,29E-38   | TRUE |
| Rv0102  | 61   | 150 | -1,298081353 | -1,788220793 | -8,634838506 | 5,88E-18 | 3,93E-17   | 9,59E-18   | TRUE |
| Rv0103c | 91   | 259 | -1,509013647 | -1,999153088 | -12,23035317 | 2,14E-34 | 2,45E-33   | 5,99E-34   | TRUE |
| Rv0106  | 17   | 212 | -3,640457613 | -4,130597053 | -15,80041368 | 3,09E-56 | 5,83E-55   | 1,42E-55   | TRUE |
| Rv0108c | 51   | 8   | 2,672425342  | 2,182285902  | 4,841897303  | 1,29E-06 | 4,18E-06   | 1,02E-06   | TRUE |
| Rv0110  | 22   | 2   | 3,459431619  | 2,969292179  | 3,775269792  | 0,00016  | 0,00040113 | 9,79E-05   | TRUE |
| Rv0116c | 71   | 200 | -1,49410907  | -1,98424851  | -10,69444081 | 1,08E-26 | 1,03E-25   | 2,51E-26   | TRUE |
| Rv0118c | 5    | 25  | -2,321928095 | -2,812067535 | -4,641811333 | 3,45E-06 | 1,06E-05   | 2,59E-06   | TRUE |
| Rv0120c | 72   | 357 | -2,309855263 | -2,799994703 | -17,50525955 | 1,31E-68 | 3,02E-67   | 7,38E-68   | TRUE |
| Rv0125  | 145  | 30  | 2,273018494  | 1,782879054  | 7,148364385  | 8,78E-13 | 4,42E-12   | 1,08E-12   | TRUE |
| Rv0126  | 126  | 152 | -0,27064759  | -0,76078703  | -4,418923511 | 9,92E-06 | 2,87E-05   | 7,01E-06   | TRUE |
| Rv0127  | 93   | 24  | 1,95419631   | 1,46405687   | 4,968031367  | 6,76E-07 | 2,25E-06   | 5,50E-07   | TRUE |
| Rv0134  | 163  | 74  | 1,139274789  | 0,649135349  | 3,358730872  | 0,000783 | 0,00175829 | 0,00042965 | TRUE |
| Rv0135c | 272  | 81  | 1,747612838  | 1,257473398  | 7,564275155  | 3,90E-14 | 2,12E-13   | 5,17E-14   | TRUE |
| Rv0136  | 2709 | 98  | 4,788834834  | 4,298695394  | 48,1991963   | 0        | 0          | 0          | TRUE |

|         |      |      |              |              |              |          |            |            |      |
|---------|------|------|--------------|--------------|--------------|----------|------------|------------|------|
| Rv0138  | 214  | 74   | 1,532013621  | 1,041874181  | 5,770587436  | 7,90E-09 | 3,10E-08   | 7,58E-09   | TRUE |
| Rv0139  | 150  | 27   | 2,473931188  | 1,983791748  | 7,813059407  | 5,58E-15 | 3,22E-14   | 7,87E-15   | TRUE |
| Rv0141c | 67   | 10   | 2,744161096  | 2,254021656  | 5,661331725  | 1,50E-08 | 5,73E-08   | 1,40E-08   | TRUE |
| Rv0142  | 109  | 13   | 3,067744607  | 2,577605167  | 7,807405548  | 5,84E-15 | 3,36E-14   | 8,20E-15   | TRUE |
| Rv0143c | 47   | 93   | -0,984569959 | -1,474709399 | -5,91989791  | 3,22E-09 | 1,31E-08   | 3,20E-09   | TRUE |
| Rv0144  | 85   | 200  | -1,234465254 | -1,724604694 | -9,722937958 | 2,41E-22 | 1,95E-21   | 4,76E-22   | TRUE |
| Rv0146  | 78   | 111  | -0,509013647 | -0,999153088 | -4,758421299 | 1,95E-06 | 6,19E-06   | 1,51E-06   | TRUE |
| Rv0149  | 167  | 65   | 1,361336479  | 0,871197039  | 4,390419862  | 1,13E-05 | 3,25E-05   | 7,94E-06   | TRUE |
| Rv0155  | 39   | 6    | 2,700439718  | 2,210300278  | 4,267677572  | 1,98E-05 | 5,51E-05   | 1,35E-05   | TRUE |
| Rv0160c | 4    | 23   | -2,523561956 | -3,013701396 | -4,607661767 | 4,07E-06 | 1,24E-05   | 3,02E-06   | TRUE |
| Rv0164  | 10   | 25   | -1,321928095 | -1,812067535 | -3,557099429 | 0,000375 | 0,00089558 | 0,00021884 | TRUE |
| Rv0165c | 44   | 9    | 2,289506617  | 1,799367177  | 3,962619043  | 7,41E-05 | 0,00019254 | 4,70E-05   | TRUE |
| Rv0166  | 47   | 13   | 1,854149134  | 1,364009693  | 3,347873009  | 0,000814 | 0,00182236 | 0,0004453  | TRUE |
| Rv0170  | 44   | 124  | -1,494764692 | -1,984904132 | -8,422183347 | 3,70E-17 | 2,35E-16   | 5,74E-17   | TRUE |
| Rv0171  | 42   | 59   | -0,490325627 | -0,980465067 | -3,415164226 | 0,000637 | 0,00145439 | 0,00035528 | TRUE |
| Rv0172  | 66   | 16   | 2,044394119  | 1,554254679  | 4,374046456  | 1,22E-05 | 3,49E-05   | 8,52E-06   | TRUE |
| Rv0173  | 32   | 117  | -1,87036472  | -2,36050416  | -9,115883304 | 7,80E-20 | 5,66E-19   | 1,38E-19   | TRUE |
| Rv0174  | 83   | 196  | -1,239670413 | -1,729809853 | -9,645531503 | 5,13E-22 | 4,06E-21   | 9,92E-22   | TRUE |
| Rv0175  | 93   | 144  | -0,63076619  | -1,12090563  | -5,953448053 | 2,63E-09 | 1,07E-08   | 2,62E-09   | TRUE |
| Rv0181c | 60   | 118  | -0,975752454 | -1,465891894 | -6,638685954 | 3,16E-11 | 1,46E-10   | 3,58E-11   | TRUE |
| Rv0185  | 33   | 94   | -1,510194732 | -2,000334172 | -7,370045964 | 1,71E-13 | 8,95E-13   | 2,19E-13   | TRUE |
| Rv0186  | 57   | 303  | -2,410283969 | -2,900423409 | -16,41674405 | 1,45E-60 | 2,94E-59   | 7,18E-60   | TRUE |
| Rv0186A | 3725 | 115  | 5,017534659  | 4,527395219  | 57,22301116  | 0        | 0          | 0          | TRUE |
| Rv0190  | 152  | 45   | 1,756074417  | 1,265934977  | 5,683901586  | 1,32E-08 | 5,06E-08   | 1,24E-08   | TRUE |
| Rv0194  | 85   | 7    | 3,602036014  | 3,111896574  | 7,587443057  | 3,26E-14 | 1,78E-13   | 4,36E-14   | TRUE |
| Rv0195  | 138  | 3    | 5,523561956  | 5,033422516  | 11,20862747  | 3,70E-29 | 3,80E-28   | 9,29E-29   | TRUE |
| Rv0197  | 44   | 4    | 3,459431619  | 2,969292179  | 5,339079798  | 9,34E-08 | 3,35E-07   | 8,19E-08   | TRUE |
| Rv0198c | 156  | 182  | -0,222392421 | -0,712531861 | -4,566870214 | 4,95E-06 | 1,49E-05   | 3,63E-06   | TRUE |
| Rv0206c | 221  | 308  | -0,478883981 | -0,969023421 | -7,729173957 | 1,08E-14 | 6,11E-14   | 1,49E-14   | TRUE |
| Rv0207c | 71   | 250  | -1,816037165 | -2,306176605 | -13,1428436  | 1,87E-39 | 2,54E-38   | 6,20E-39   | TRUE |
| Rv0208c | 47   | 102  | -1,11783649  | -1,60797593  | -6,605690632 | 3,96E-11 | 1,82E-10   | 4,44E-11   | TRUE |
| Rv0211  | 476  | 2226 | -2,225420114 | -2,715559554 | -43,062807   | 0        | 0          | 0          | TRUE |
| Rv0212c | 94   | 21   | 2,162271429  | 1,672131989  | 5,502483203  | 3,74E-08 | 1,38E-07   | 3,38E-08   | TRUE |
| Rv0214  | 195  | 205  | -0,072149786 | -0,562289226 | -3,925893232 | 8,64E-05 | 0,00022331 | 5,46E-05   | TRUE |
| Rv0215c | 34   | 6    | 2,502500341  | 2,0123609    | 3,754475262  | 0,000174 | 0,00043371 | 0,00010591 | TRUE |
| Rv0217c | 9    | 26   | -1,530514717 | -2,020654157 | -3,901506284 | 9,56E-05 | 0,00024584 | 6,01E-05   | TRUE |
| Rv0218  | 17   | 36   | -1,08246216  | -1,5726016   | -3,861426708 | 0,000113 | 0,00028715 | 7,02E-05   | TRUE |

|         |      |      |              |              |              |           |            |            |      |
|---------|------|------|--------------|--------------|--------------|-----------|------------|------------|------|
| Rv0223c | 252  | 94   | 1,422691072  | 0,932551632  | 5,712324123  | 1,11E-08  | 4,32E-08   | 1,05E-08   | TRUE |
| Rv0227c | 17   | 110  | -2,693896872 | -3,184036312 | -10,33687311 | 4,80E-25  | 4,28E-24   | 1,05E-24   | TRUE |
| Rv0229c | 32   | 5    | 2,678071905  | 2,187932465  | 3,841482865  | 0,000122  | 0,00031111 | 7,60E-05   | TRUE |
| Rv0230c | 19   | 38   | -1           | -1,49013944  | -3,813322495 | 0,000137  | 0,0003461  | 8,45E-05   | TRUE |
| Rv0232  | 335  | 5    | 6,06608919   | 5,57594975   | 17,610518    | 2,05E-69  | 4,78E-68   | 1,17E-68   | TRUE |
| Rv0233  | 880  | 26   | 5,080919995  | 4,590780555  | 27,87770572  | 4,97E-171 | 3,96E-169  | 9,68E-170  | TRUE |
| Rv0235c | 89   | 10   | 3,153805336  | 2,663665896  | 7,182425114  | 6,85E-13  | 3,48E-12   | 8,50E-13   | TRUE |
| Rv0236c | 74   | 17   | 2,121990524  | 1,631851084  | 4,797858614  | 1,60E-06  | 5,15E-06   | 1,26E-06   | TRUE |
| Rv0238  | 64   | 16   | 2            | 1,50986056   | 4,216545609  | 2,48E-05  | 6,86E-05   | 1,68E-05   | TRUE |
| Rv0239  | 81   | 14   | 2,532495081  | 2,042355641  | 5,851004997  | 4,89E-09  | 1,96E-08   | 4,78E-09   | TRUE |
| Rv0240  | 37   | 8    | 2,209453366  | 1,719313926  | 3,520589993  | 0,000431  | 0,00101353 | 0,00024766 | TRUE |
| Rv0241c | 55   | 13   | 2,080919995  | 1,590780555  | 4,060963102  | 4,89E-05  | 0,00013031 | 3,18E-05   | TRUE |
| Rv0243  | 144  | 242  | -0,748938236 | -1,239077676 | -8,359258572 | 6,31E-17  | 3,96E-16   | 9,68E-17   | TRUE |
| Rv0244c | 369  | 185  | 0,996095546  | 0,505956106  | 4,038551446  | 5,38E-05  | 0,00014239 | 3,48E-05   | TRUE |
| Rv0246  | 32   | 122  | -1,930737338 | -2,420876778 | -9,447367963 | 3,47E-21  | 2,68E-20   | 6,54E-21   | TRUE |
| Rv0247c | 327  | 30   | 3,44625623   | 2,95611679   | 14,52507535  | 8,40E-48  | 1,40E-46   | 3,41E-47   | TRUE |
| Rv0248c | 1519 | 120  | 3,662015559  | 3,171876119  | 32,37052434  | 7,14E-230 | 8,71E-228  | 2,13E-228  | TRUE |
| Rv0249c | 1756 | 62   | 4,823880819  | 4,333741379  | 38,87682066  | 0         | 0          | 0          | TRUE |
| Rv0250c | 701  | 20   | 5,131342539  | 4,641203099  | 24,93487058  | 3,12E-137 | 1,64E-135  | 4,02E-136  | TRUE |
| Rv0251c | 3125 | 185  | 4,078259014  | 3,588119574  | 48,8869892   | 0         | 0          | 0          | TRUE |
| Rv0252  | 51   | 10   | 2,350497247  | 1,860357807  | 4,364446164  | 1,27E-05  | 3,63E-05   | 8,88E-06   | TRUE |
| Rv0253  | 20   | 40   | -1           | -1,49013944  | -3,912392901 | 9,14E-05  | 0,00023555 | 5,76E-05   | TRUE |
| Rv0258c | 24   | 66   | -1,459431619 | -1,949571059 | -6,07193143  | 1,26E-09  | 5,26E-09   | 1,28E-09   | TRUE |
| Rv0260c | 21   | 108  | -2,362570079 | -2,852709519 | -9,718994678 | 2,50E-22  | 2,02E-21   | 4,93E-22   | TRUE |
| Rv0263c | 64   | 7    | 3,192645078  | 2,702505638  | 6,137980394  | 8,36E-10  | 3,54E-09   | 8,64E-10   | TRUE |
| Rv0266c | 142  | 160  | -0,172180975 | -0,662320415 | -4,014915795 | 5,95E-05  | 0,00015659 | 3,83E-05   | TRUE |
| Rv0268c | 127  | 33   | 1,944290567  | 1,454151127  | 5,776314318  | 7,64E-09  | 3,01E-08   | 7,35E-09   | TRUE |
| Rv0269c | 61   | 12   | 2,345774837  | 1,855635397  | 4,764999295  | 1,89E-06  | 6,01E-06   | 1,47E-06   | TRUE |
| Rv0273c | 95   | 10   | 3,247927513  | 2,757788073  | 7,55850936   | 4,08E-14  | 2,21E-13   | 5,39E-14   | TRUE |
| Rv0275c | 521  | 109  | 2,256955238  | 1,766815797  | 13,46817436  | 2,41E-41  | 3,47E-40   | 8,48E-41   | TRUE |
| Rv0276  | 772  | 364  | 1,084662397  | 0,594522957  | 6,761613208  | 1,36E-11  | 6,45E-11   | 1,58E-11   | TRUE |
| Rv0280  | 148  | 663  | -2,163411694 | -2,653551135 | -23,19323604 | 5,33E-119 | 2,36E-117  | 5,78E-118  | TRUE |
| Rv0281  | 140  | 352  | -1,330148602 | -1,820288042 | -13,39216447 | 6,72E-41  | 9,54E-40   | 2,33E-40   | TRUE |
| Rv0282  | 583  | 1081 | -0,890798735 | -1,380938175 | -19,22587272 | 2,25E-82  | 6,46E-81   | 1,58E-81   | TRUE |
| Rv0283  | 75   | 108  | -0,526068812 | -1,016208252 | -4,759692106 | 1,94E-06  | 6,16E-06   | 1,51E-06   | TRUE |
| Rv0284  | 245  | 648  | -1,403212064 | -1,893351504 | -18,66597043 | 9,37E-78  | 2,44E-76   | 5,96E-77   | TRUE |
| Rv0285  | 2    | 16   | -3           | -3,49013944  | -4,097902859 | 4,17E-05  | 0,00011197 | 2,74E-05   | TRUE |



|         |     |     |              |              |              |           |            |            |      |
|---------|-----|-----|--------------|--------------|--------------|-----------|------------|------------|------|
| Rv0286  | 52  | 135 | -1,376375879 | -1,866515319 | -8,435047243 | 3,31E-17  | 2,12E-16   | 5,18E-17   | TRUE |
| Rv0287  | 24  | 152 | -2,662965013 | -3,153104453 | -12,0979472  | 1,08E-33  | 1,21E-32   | 2,96E-33   | TRUE |
| Rv0288  | 27  | 82  | -1,602664502 | -2,092803942 | -7,087216261 | 1,37E-12  | 6,82E-12   | 1,67E-12   | TRUE |
| Rv0289  | 282 | 680 | -1,269839584 | -1,759979024 | -18,19078403 | 6,11E-74  | 1,55E-72   | 3,78E-73   | TRUE |
| Rv0290  | 40  | 211 | -2,399171094 | -2,889310534 | -13,67274409 | 1,48E-42  | 2,18E-41   | 5,34E-42   | TRUE |
| Rv0291  | 17  | 94  | -2,46712601  | -2,95726545  | -9,23067773  | 2,69E-20  | 1,99E-19   | 4,86E-20   | TRUE |
| Rv0293c | 101 | 489 | -2,275479172 | -2,765618612 | -20,35836787 | 3,91E-92  | 1,24E-90   | 3,04E-91   | TRUE |
| Rv0296c | 14  | 0   | 4,807354922  | 4,317215482  | 3,466634614  | 0,000527  | 0,00122282 | 0,0002988  | TRUE |
| Rv0297  | 103 | 149 | -0,532667993 | -1,022807433 | -5,620722129 | 1,90E-08  | 7,22E-08   | 1,77E-08   | TRUE |
| Rv0298  | 203 | 50  | 2,021479727  | 1,531340287  | 7,58872213   | 3,23E-14  | 1,77E-13   | 4,32E-14   | TRUE |
| Rv0300  | 116 | 19  | 2,610053482  | 2,119914042  | 7,170902711  | 7,45E-13  | 3,77E-12   | 9,22E-13   | TRUE |
| Rv0302  | 646 | 6   | 6,750427854  | 6,260288414  | 24,38657796  | 2,37E-131 | 1,20E-129  | 2,94E-130  | TRUE |
| Rv0303  | 265 | 61  | 2,119111212  | 1,628971772  | 9,068835694  | 1,20E-19  | 8,68E-19   | 2,12E-19   | TRUE |
| Rv0304c | 40  | 10  | 2            | 1,50986056   | 3,333424491  | 0,000858  | 0,00191366 | 0,00046748 | TRUE |
| Rv0305c | 74  | 15  | 2,30256277   | 1,81242333   | 5,164592259  | 2,41E-07  | 8,36E-07   | 2,04E-07   | TRUE |
| Rv0308  | 64  | 319 | -2,317412614 | -2,807552054 | -16,57000543 | 1,15E-61  | 2,38E-60   | 5,83E-61   | TRUE |
| Rv0309  | 119 | 153 | -0,362570079 | -0,852709519 | -4,890562087 | 1,01E-06  | 3,29E-06   | 8,04E-07   | TRUE |
| Rv0312  | 31  | 169 | -2,446683126 | -2,936822566 | -12,33546735 | 5,83E-35  | 6,78E-34   | 1,66E-34   | TRUE |
| Rv0313  | 600 | 687 | -0,195347598 | -0,685487038 | -8,58096381  | 9,41E-18  | 6,15E-17   | 1,50E-17   | TRUE |
| Rv0319  | 29  | 5   | 2,5360529    | 2,04591346   | 3,50480564   | 0,000457  | 0,00107008 | 0,00026124 | TRUE |
| Rv0321  | 2   | 77  | -5,266786541 | -5,756925981 | -10,01165083 | 1,35E-23  | 1,16E-22   | 2,84E-23   | TRUE |
| Rv0323c | 78  | 5   | 3,963474124  | 3,473334684  | 7,619938014  | 2,54E-14  | 1,39E-13   | 3,41E-14   | TRUE |
| Rv0324  | 127 | 4   | 4,988684687  | 4,498545247  | 10,54333762  | 5,45E-26  | 5,03E-25   | 1,23E-25   | TRUE |
| Rv0325  | 59  | 2   | 4,882643049  | 4,392503609  | 7,146883451  | 8,88E-13  | 4,46E-12   | 1,09E-12   | TRUE |
| Rv0327c | 165 | 1   | 7,366322214  | 6,876182774  | 12,1661591   | 4,71E-34  | 5,33E-33   | 1,30E-33   | TRUE |
| Rv0328  | 72  | 2   | 5,169925001  | 4,679785561  | 8,002970824  | 1,21E-15  | 7,16E-15   | 1,75E-15   | TRUE |
| Rv0330c | 64  | 1   | 6            | 5,50986056   | 7,693397928  | 1,43E-14  | 8,02E-14   | 1,96E-14   | TRUE |
| Rv0331  | 409 | 10  | 5,354028938  | 4,863889498  | 19,203305    | 3,47E-82  | 9,83E-81   | 2,40E-81   | TRUE |
| Rv0332  | 170 | 3   | 5,824428435  | 5,334288995  | 12,51437603  | 6,23E-36  | 7,39E-35   | 1,81E-35   | TRUE |
| Rv0333  | 70  | 17  | 2,041820176  | 1,551680736  | 4,49920072   | 6,82E-06  | 2,00E-05   | 4,90E-06   | TRUE |
| Rv0334  | 118 | 8   | 3,882643049  | 3,392503609  | 9,283412139  | 1,64E-20  | 1,23E-19   | 3,01E-20   | TRUE |
| Rv0338c | 274 | 81  | 1,75818208   | 1,26804264   | 7,641842194  | 2,14E-14  | 1,18E-13   | 2,89E-14   | TRUE |
| Rv0339c | 22  | 2   | 3,459431619  | 2,969292179  | 3,775269792  | 0,00016   | 0,00040113 | 9,79E-05   | TRUE |
| Rv0340  | 92  | 145 | -0,656347134 | -1,146486574 | -6,083394382 | 1,18E-09  | 4,90E-09   | 1,20E-09   | TRUE |
| Rv0341  | 72  | 495 | -2,781359714 | -3,271499154 | -22,19509901 | 3,83E-109 | 1,45E-107  | 3,55E-108  | TRUE |
| Rv0342  | 247 | 310 | -0,327757174 | -0,817896614 | -6,718685202 | 1,83E-11  | 8,64E-11   | 2,11E-11   | TRUE |
| Rv0347  | 191 | 214 | -0,164038158 | -0,654177598 | -4,592934069 | 4,37E-06  | 1,32E-05   | 3,23E-06   | TRUE |

|         |       |      |              |              |              |           |            |            |      |
|---------|-------|------|--------------|--------------|--------------|-----------|------------|------------|------|
| Rv0348  | 86    | 7    | 3,618909833  | 3,128770393  | 7,650924894  | 2,00E-14  | 1,11E-13   | 2,70E-14   | TRUE |
| Rv0349  | 57    | 6    | 3,247927513  | 2,757788073  | 5,854710454  | 4,78E-09  | 1,92E-08   | 4,68E-09   | TRUE |
| Rv0350  | 11315 | 1071 | 3,401206199  | 2,911066759  | 85,14210613  | 0         | 0          | 0          | TRUE |
| Rv0351  | 3994  | 441  | 3,178983772  | 2,688844332  | 48,43299336  | 0         | 0          | 0          | TRUE |
| Rv0352  | 4439  | 1222 | 1,860990424  | 1,370850983  | 32,75007264  | 3,03E-235 | 3,82E-233  | 9,32E-234  | TRUE |
| Rv0353  | 622   | 117  | 2,410406051  | 1,920266611  | 15,5748269   | 1,08E-54  | 2,00E-53   | 4,88E-54   | TRUE |
| Rv0355c | 66    | 81   | -0,295455884 | -0,785595324 | -3,316441244 | 0,000912  | 0,00200917 | 0,00049095 | TRUE |
| Rv0363c | 73    | 134  | -0,876264632 | -1,366404072 | -6,709119745 | 1,96E-11  | 9,21E-11   | 2,25E-11   | TRUE |
| Rv0366c | 15    | 1    | 3,906890596  | 3,416751156  | 3,319453818  | 0,000902  | 0,00199607 | 0,00048679 | TRUE |
| Rv0367c | 49    | 13   | 1,914270126  | 1,424130686  | 3,532044672  | 0,000412  | 0,00097474 | 0,00023818 | TRUE |
| Rv0374c | 32    | 2    | 4            | 3,50986056   | 4,900805323  | 9,54E-07  | 3,13E-06   | 7,64E-07   | TRUE |
| Rv0377  | 29    | 82   | -1,499571009 | -1,98971045  | -6,859563209 | 6,91E-12  | 3,32E-11   | 8,12E-12   | TRUE |
| Rv0382c | 439   | 87   | 2,335133634  | 1,844994194  | 12,73562392  | 3,75E-37  | 4,77E-36   | 1,17E-36   | TRUE |
| Rv0383c | 680   | 181  | 1,909545049  | 1,419405609  | 13,12994361  | 2,22E-39  | 3,00E-38   | 7,32E-39   | TRUE |
| Rv0384c | 4052  | 1030 | 1,975989837  | 1,485850397  | 33,23428625  | 3,44E-242 | 4,98E-240  | 1,22E-240  | TRUE |
| Rv0385  | 44    | 4    | 3,459431619  | 2,969292179  | 5,339079798  | 9,34E-08  | 3,35E-07   | 8,19E-08   | TRUE |
| Rv0386  | 125   | 9    | 3,795859283  | 3,305719843  | 9,451482672  | 3,34E-21  | 2,58E-20   | 6,30E-21   | TRUE |
| Rv0390  | 48    | 75   | -0,64385619  | -1,13399563  | -4,336570589 | 1,45E-05  | 4,10E-05   | 1,00E-05   | TRUE |
| Rv0392c | 33    | 3    | 3,459431619  | 2,969292179  | 4,623760527  | 3,77E-06  | 1,15E-05   | 2,81E-06   | TRUE |
| Rv0398c | 15    | 68   | -2,180572246 | -2,670711686 | -7,451127411 | 9,25E-14  | 4,94E-13   | 1,21E-13   | TRUE |
| Rv0404  | 22    | 1    | 4,459431619  | 3,969292179  | 4,243748384  | 2,20E-05  | 6,09E-05   | 1,49E-05   | TRUE |
| Rv0405  | 206   | 82   | 1,328948523  | 0,838809083  | 4,721488095  | 2,34E-06  | 7,36E-06   | 1,80E-06   | TRUE |
| Rv0409  | 37    | 135  | -1,867362231 | -2,357501671 | -9,784774081 | 1,31E-22  | 1,07E-21   | 2,62E-22   | TRUE |
| Rv0410c | 100   | 36   | 1,473931188  | 0,983791748  | 3,762168256  | 0,000168  | 0,00042139 | 0,00010297 | TRUE |
| Rv0420c | 44    | 8    | 2,459431619  | 1,969292179  | 4,210987639  | 2,54E-05  | 7,02E-05   | 1,72E-05   | TRUE |
| Rv0422c | 69    | 100  | -0,535331733 | -1,025471173 | -4,614312898 | 3,94E-06  | 1,20E-05   | 2,93E-06   | TRUE |
| Rv0423c | 588   | 294  | 1            | 0,50986056   | 5,134824227  | 2,82E-07  | 9,72E-07   | 2,38E-07   | TRUE |
| Rv0425c | 204   | 97   | 1,0725125    | 0,58237306   | 3,410380046  | 0,000649  | 0,00147885 | 0,00036137 | TRUE |
| Rv0426c | 161   | 47   | 1,776328026  | 1,286188586  | 5,922552507  | 3,17E-09  | 1,29E-08   | 3,15E-09   | TRUE |
| Rv0440  | 4007  | 2393 | 0,743702113  | 0,253562673  | 6,991287398  | 2,72E-12  | 1,33E-11   | 3,26E-12   | TRUE |
| Rv0442c | 21    | 79   | -1,911463325 | -2,401602765 | -7,566799855 | 3,83E-14  | 2,08E-13   | 5,09E-14   | TRUE |
| Rv0443  | 179   | 69   | 1,37529132   | 0,88515188   | 4,607115682  | 4,08E-06  | 1,24E-05   | 3,03E-06   | TRUE |
| Rv0445c | 26    | 4    | 2,700439718  | 2,210300278  | 3,484523047  | 0,000493  | 0,00114939 | 0,00028069 | TRUE |
| Rv0449c | 16    | 81   | -2,339850003 | -2,829989443 | -8,38268412  | 5,17E-17  | 3,27E-16   | 7,99E-17   | TRUE |
| Rv0452  | 25    | 1    | 4,64385619   | 4,15371675   | 4,585143448  | 4,54E-06  | 1,37E-05   | 3,34E-06   | TRUE |
| Rv0455c | 468   | 66   | 2,8259706    | 2,33583116   | 15,29001881  | 8,91E-53  | 1,60E-51   | 3,92E-52   | TRUE |
| Rv0460  | 87    | 24   | 1,857980995  | 1,367841555  | 4,564786318  | 5,00E-06  | 1,50E-05   | 3,66E-06   | TRUE |

|         |     |      |              |              |              |           |            |            |      |
|---------|-----|------|--------------|--------------|--------------|-----------|------------|------------|------|
| Rv0465c | 194 | 86   | 1,173648087  | 0,683508647  | 3,835430797  | 0,000125  | 0,00031763 | 7,76E-05   | TRUE |
| Rv0467  | 298 | 1182 | -1,9878458   | -2,47798524  | -29,82235326 | 2,00E-195 | 1,82E-193  | 4,45E-194  | TRUE |
| Rv0468  | 102 | 299  | -1,551576332 | -2,041715772 | -13,32237562 | 1,72E-40  | 2,38E-39   | 5,83E-40   | TRUE |
| Rv0469  | 185 | 87   | 1,088437965  | 0,598298525  | 3,32724348   | 0,000877  | 0,00194827 | 0,00047607 | TRUE |
| Rv0470c | 52  | 8    | 2,700439718  | 2,210300278  | 4,92791943   | 8,31E-07  | 2,74E-06   | 6,70E-07   | TRUE |
| Rv0474  | 105 | 35   | 1,584962501  | 1,094823061  | 4,208409643  | 2,57E-05  | 7,10E-05   | 1,73E-05   | TRUE |
| Rv0477  | 231 | 58   | 1,993768046  | 1,503628606  | 7,987093048  | 1,38E-15  | 8,14E-15   | 1,99E-15   | TRUE |
| Rv0481c | 8   | 21   | -1,392317423 | -1,882456863 | -3,345703932 | 0,000821  | 0,00183457 | 0,00044829 | TRUE |
| Rv0484c | 16  | 37   | -1,209453366 | -1,699592806 | -4,138722688 | 3,49E-05  | 9,44E-05   | 2,31E-05   | TRUE |
| Rv0485  | 385 | 197  | 0,966662816  | 0,476523376  | 3,905138961  | 9,42E-05  | 0,00024241 | 5,92E-05   | TRUE |
| Rv0486  | 99  | 36   | 1,459431619  | 0,969292179  | 3,697416637  | 0,000218  | 0,0005356  | 0,00013088 | TRUE |
| Rv0487  | 25  | 70   | -1,485426827 | -1,975566267 | -6,308137599 | 2,82E-10  | 1,23E-09   | 3,02E-10   | TRUE |
| Rv0489  | 56  | 2    | 4,807354922  | 4,317215482  | 6,933334577  | 4,11E-12  | 1,99E-11   | 4,87E-12   | TRUE |
| Rv0490  | 306 | 103  | 1,570887316  | 1,080747875  | 7,110237347  | 1,16E-12  | 5,78E-12   | 1,41E-12   | TRUE |
| Rv0491  | 148 | 42   | 1,817135943  | 1,326996503  | 5,817235721  | 5,98E-09  | 2,38E-08   | 5,81E-09   | TRUE |
| Rv0492c | 36  | 6    | 2,584962501  | 2,094823061  | 3,964576773  | 7,35E-05  | 0,00019122 | 4,67E-05   | TRUE |
| Rv0493c | 32  | 4    | 3            | 2,50986056   | 4,167603461  | 3,08E-05  | 8,39E-05   | 2,05E-05   | TRUE |
| Rv0495c | 35  | 8    | 2,129283017  | 1,639143577  | 3,310118966  | 0,000933  | 0,0020528  | 0,00050133 | TRUE |
| Rv0496  | 107 | 40   | 1,419538892  | 0,929399451  | 3,711295752  | 0,000206  | 0,00050834 | 0,00012422 | TRUE |
| Rv0497  | 28  | 2    | 3,807354922  | 3,317215482  | 4,479742164  | 7,47E-06  | 2,18E-05   | 5,34E-06   | TRUE |
| Rv0499  | 18  | 1    | 4,169925001  | 3,679785561  | 3,741720075  | 0,000183  | 0,00045386 | 0,00011073 | TRUE |
| Rv0500A | 68  | 130  | -0,934904972 | -1,425044412 | -6,822105453 | 8,97E-12  | 4,28E-11   | 1,05E-11   | TRUE |
| Rv0501  | 245 | 352  | -0,52279368  | -1,01293312  | -8,572113816 | 1,02E-17  | 6,62E-17   | 1,62E-17   | TRUE |
| Rv0502  | 663 | 1962 | -1,565244266 | -2,055383706 | -34,31337995 | 4,96E-258 | 7,44E-256  | 1,82E-256  | TRUE |
| Rv0503c | 124 | 272  | -1,133266531 | -1,623405971 | -10,86295519 | 1,73E-27  | 1,70E-26   | 4,15E-27   | TRUE |
| Rv0507  | 41  | 106  | -1,37036845  | -1,86050789  | -7,457897604 | 8,79E-14  | 4,71E-13   | 1,15E-13   | TRUE |
| Rv0509  | 335 | 495  | -0,56326743  | -1,05340687  | -10,49898285 | 8,73E-26  | 7,97E-25   | 1,95E-25   | TRUE |
| Rv0510  | 107 | 173  | -0,693161241 | -1,183300681 | -6,814770438 | 9,44E-12  | 4,50E-11   | 1,10E-11   | TRUE |
| Rv0512  | 82  | 128  | -0,642447995 | -1,132587435 | -5,659903222 | 1,51E-08  | 5,78E-08   | 1,41E-08   | TRUE |
| Rv0516c | 146 | 9    | 4,019899557  | 3,529760117  | 10,49158726  | 9,44E-26  | 8,56E-25   | 2,09E-25   | TRUE |
| Rv0517  | 57  | 10   | 2,510961919  | 2,020822479  | 4,874585136  | 1,09E-06  | 3,56E-06   | 8,70E-07   | TRUE |
| Rv0530  | 171 | 50   | 1,773996325  | 1,283856885  | 6,095148675  | 1,09E-09  | 4,57E-09   | 1,12E-09   | TRUE |
| Rv0530A | 218 | 54   | 2,013296823  | 1,523157383  | 7,833246148  | 4,75E-15  | 2,75E-14   | 6,73E-15   | TRUE |
| Rv0538  | 44  | 9    | 2,289506617  | 1,799367177  | 3,962619043  | 7,41E-05  | 0,00019254 | 4,70E-05   | TRUE |
| Rv0543c | 66  | 17   | 1,956931278  | 1,466791838  | 4,190949647  | 2,78E-05  | 7,63E-05   | 1,86E-05   | TRUE |
| Rv0545c | 49  | 151  | -1,623694895 | -2,113834335 | -9,679145953 | 3,70E-22  | 2,94E-21   | 7,17E-22   | TRUE |
| Rv0547c | 13  | 107  | -3,041027268 | -3,531166708 | -10,64627568 | 1,81E-26  | 1,72E-25   | 4,19E-26   | TRUE |

|         |      |     |              |              |              |           |            |            |      |
|---------|------|-----|--------------|--------------|--------------|-----------|------------|------------|------|
| Rv0548c | 57   | 216 | -1,921997488 | -2,412136928 | -12,54497526 | 4,24E-36  | 5,07E-35   | 1,24E-35   | TRUE |
| Rv0550c | 15   | 35  | -1,222392421 | -1,712531861 | -4,04686551  | 5,19E-05  | 0,00013752 | 3,36E-05   | TRUE |
| Rv0551c | 64   | 12  | 2,415037499  | 1,924898059  | 5,00254266   | 5,66E-07  | 1,89E-06   | 4,62E-07   | TRUE |
| Rv0552  | 31   | 127 | -2,034488376 | -2,524627816 | -9,873009315 | 5,45E-23  | 4,57E-22   | 1,12E-22   | TRUE |
| Rv0553  | 28   | 5   | 2,485426827  | 1,995287387  | 3,388223397  | 0,000703  | 0,00159619 | 0,00038962 | TRUE |
| Rv0555  | 36   | 5   | 2,847996907  | 2,357857467  | 4,263547075  | 2,01E-05  | 5,60E-05   | 1,37E-05   | TRUE |
| Rv0557  | 114  | 45  | 1,341036918  | 0,850897478  | 3,55526508   | 0,000378  | 0,00090075 | 0,0002201  | TRUE |
| Rv0558  | 92   | 203 | -1,141773961 | -1,631913401 | -9,419265388 | 4,54E-21  | 3,48E-20   | 8,50E-21   | TRUE |
| Rv0559c | 117  | 23  | 2,346802764  | 1,856663323  | 6,601867535  | 4,06E-11  | 1,86E-10   | 4,55E-11   | TRUE |
| Rv0560c | 32   | 6   | 2,415037499  | 1,924898059  | 3,537273632  | 0,000404  | 0,00095738 | 0,0002338  | TRUE |
| Rv0561c | 32   | 3   | 3,415037499  | 2,924898059  | 4,519725553  | 6,19E-06  | 1,83E-05   | 4,46E-06   | TRUE |
| Rv0562  | 56   | 224 | -2           | -2,49013944  | -13,01124681 | 1,06E-38  | 1,40E-37   | 3,42E-38   | TRUE |
| Rv0563  | 1340 | 150 | 3,159198595  | 2,669059155  | 27,91367496  | 1,82E-171 | 1,48E-169  | 3,62E-170  | TRUE |
| Rv0564c | 18   | 75  | -2,058893689 | -2,549033129 | -7,6279237   | 2,39E-14  | 1,31E-13   | 3,21E-14   | TRUE |
| Rv0568  | 96   | 171 | -0,832890014 | -1,323029454 | -7,394024815 | 1,42E-13  | 7,51E-13   | 1,83E-13   | TRUE |
| Rv0569  | 40   | 220 | -2,459431619 | -2,949571059 | -14,10445742 | 3,57E-45  | 5,59E-44   | 1,37E-44   | TRUE |
| Rv0570  | 74   | 487 | -2,718324596 | -3,208464036 | -21,82798963 | 1,26E-105 | 4,59E-104  | 1,12E-104  | TRUE |
| Rv0575c | 323  | 22  | 3,875958736  | 3,385819296  | 15,34765482  | 3,67E-53  | 6,67E-52   | 1,63E-52   | TRUE |
| Rv0577  | 111  | 37  | 1,584962501  | 1,094823061  | 4,326997395  | 1,51E-05  | 4,27E-05   | 1,04E-05   | TRUE |
| Rv0582  | 50   | 5   | 3,321928095  | 2,831788655  | 5,558818098  | 2,72E-08  | 1,01E-07   | 2,47E-08   | TRUE |
| Rv0585c | 36   | 111 | -1,624490865 | -2,114630305 | -8,300454885 | 1,04E-16  | 6,45E-16   | 1,58E-16   | TRUE |
| Rv0586  | 2115 | 909 | 1,218305464  | 0,728166024  | 13,40737305  | 5,47E-41  | 7,80E-40   | 1,91E-40   | TRUE |
| Rv0587  | 503  | 209 | 1,267055458  | 0,776916018  | 6,908732679  | 4,89E-12  | 2,36E-11   | 5,77E-12   | TRUE |
| Rv0589  | 289  | 55  | 2,393565969  | 1,903426529  | 10,55224215  | 4,96E-26  | 4,59E-25   | 1,12E-25   | TRUE |
| Rv0590  | 94   | 249 | -1,40541308  | -1,89555252  | -11,57643946 | 5,43E-31  | 5,74E-30   | 1,40E-30   | TRUE |
| Rv0590A | 22   | 3   | 2,874469118  | 2,384329678  | 3,354941462  | 0,000794  | 0,00177948 | 0,00043458 | TRUE |
| Rv0595c | 3    | 98  | -5,029747343 | -5,519886783 | -11,28377232 | 1,58E-29  | 1,63E-28   | 3,97E-29   | TRUE |
| Rv0598c | 12   | 30  | -1,321928095 | -1,812067535 | -3,896621826 | 9,75E-05  | 0,0002501  | 6,11E-05   | TRUE |
| Rv0599c | 23   | 2   | 3,523561956  | 3,033422516  | 3,899907717  | 9,62E-05  | 0,00024706 | 6,03E-05   | TRUE |
| Rv0605  | 41   | 10  | 2,03562391   | 1,54548447   | 3,433203297  | 0,000596  | 0,00136978 | 0,00033462 | TRUE |
| Rv0608  | 350  | 403 | -0,203424917 | -0,693564357 | -6,638229756 | 3,17E-11  | 1,47E-10   | 3,59E-11   | TRUE |
| Rv0609  | 363  | 65  | 2,481457925  | 1,991318485  | 12,18578248  | 3,70E-34  | 4,21E-33   | 1,03E-33   | TRUE |
| Rv0611c | 186  | 236 | -0,343484238 | -0,833623678 | -5,95816909  | 2,55E-09  | 1,04E-08   | 2,55E-09   | TRUE |
| Rv0612  | 88   | 32  | 1,459431619  | 0,969292179  | 3,485930374  | 0,00049   | 0,00114472 | 0,00027972 | TRUE |
| Rv0613c | 13   | 86  | -2,725825037 | -3,215964477 | -9,180522662 | 4,29E-20  | 3,13E-19   | 7,65E-20   | TRUE |
| Rv0625c | 18   | 51  | -1,502500341 | -1,992639781 | -5,414814227 | 6,14E-08  | 2,23E-07   | 5,46E-08   | TRUE |
| Rv0628c | 131  | 256 | -0,966576998 | -1,456716439 | -9,733650944 | 2,17E-22  | 1,76E-21   | 4,29E-22   | TRUE |

|         |      |      |              |              |              |           |            |            |      |
|---------|------|------|--------------|--------------|--------------|-----------|------------|------------|------|
| Rv0631c | 38   | 8    | 2,247927513  | 1,757788073  | 3,623450812  | 0,000291  | 0,00070377 | 0,00017197 | TRUE |
| Rv0634B | 191  | 500  | -1,388355457 | -1,878494897 | -16,30792713 | 8,67E-60  | 1,72E-58   | 4,20E-59   | TRUE |
| Rv0634c | 72   | 11   | 2,710493383  | 2,220353943  | 5,814956742  | 6,06E-09  | 2,40E-08   | 5,88E-09   | TRUE |
| Rv0636  | 136  | 48   | 1,502500341  | 1,0123609    | 4,492628838  | 7,03E-06  | 2,06E-05   | 5,04E-06   | TRUE |
| Rv0641  | 309  | 342  | -0,146389487 | -0,636528927 | -5,66774725  | 1,45E-08  | 5,54E-08   | 1,35E-08   | TRUE |
| Rv0642c | 57   | 135  | -1,243925583 | -1,734065023 | -8,018465171 | 1,07E-15  | 6,34E-15   | 1,55E-15   | TRUE |
| Rv0643c | 63   | 257  | -2,028344626 | -2,518484066 | -14,02657784 | 1,07E-44  | 1,66E-43   | 4,06E-44   | TRUE |
| Rv0644c | 55   | 11   | 2,321928095  | 1,831788655  | 4,484926836  | 7,29E-06  | 2,14E-05   | 5,22E-06   | TRUE |
| Rv0645c | 50   | 153  | -1,613531653 | -2,103671093 | -9,713299462 | 2,65E-22  | 2,13E-21   | 5,21E-22   | TRUE |
| Rv0651  | 119  | 164  | -0,462734241 | -0,952873681 | -5,560752431 | 2,69E-08  | 1,00E-07   | 2,45E-08   | TRUE |
| Rv0653c | 47   | 7    | 2,74723393   | 2,25709449   | 4,745549832  | 2,08E-06  | 6,58E-06   | 1,61E-06   | TRUE |
| Rv0654  | 1161 | 104  | 3,480712539  | 2,990573099  | 27,53141655  | 7,39E-167 | 5,44E-165  | 1,33E-165  | TRUE |
| Rv0655  | 937  | 96   | 3,286942737  | 2,796803297  | 23,91926479  | 1,93E-126 | 9,31E-125  | 2,27E-125  | TRUE |
| Rv0656c | 22   | 3    | 2,874469118  | 2,384329678  | 3,354941462  | 0,000794  | 0,00177948 | 0,00043458 | TRUE |
| Rv0658c | 32   | 119  | -1,894817763 | -2,384957203 | -9,24943321  | 2,26E-20  | 1,68E-19   | 4,09E-20   | TRUE |
| Rv0661c | 1    | 14   | -3,807354922 | -4,297494362 | -4,103720019 | 4,07E-05  | 0,0001093  | 2,67E-05   | TRUE |
| Rv0667  | 3696 | 2939 | 0,330639398  | -0,159500042 | -4,538147057 | 5,68E-06  | 1,68E-05   | 4,11E-06   | TRUE |
| Rv0668  | 1002 | 1147 | -0,194982883 | -0,685122323 | -11,08812088 | 1,43E-28  | 1,43E-27   | 3,50E-28   | TRUE |
| Rv0669c | 36   | 4    | 3,169925001  | 2,679785561  | 4,582741107  | 4,59E-06  | 1,38E-05   | 3,37E-06   | TRUE |
| Rv0670  | 246  | 22   | 3,483082887  | 2,992943447  | 12,67372762  | 8,27E-37  | 1,04E-35   | 2,54E-36   | TRUE |
| Rv0671  | 111  | 17   | 2,706953025  | 2,216813585  | 7,213117748  | 5,47E-13  | 2,79E-12   | 6,81E-13   | TRUE |
| Rv0672  | 181  | 52   | 1,799406169  | 1,309266729  | 6,366886653  | 1,93E-10  | 8,49E-10   | 2,08E-10   | TRUE |
| Rv0673  | 58   | 6    | 3,273018494  | 2,782879054  | 5,933722508  | 2,96E-09  | 1,21E-08   | 2,95E-09   | TRUE |
| Rv0676c | 761  | 118  | 2,689109594  | 2,198970154  | 18,7983212   | 7,79E-79  | 2,06E-77   | 5,03E-78   | TRUE |
| Rv0677c | 388  | 14   | 4,79255792   | 4,30241848   | 18,23555863  | 2,69E-74  | 6,92E-73   | 1,69E-73   | TRUE |
| Rv0678  | 1856 | 116  | 4            | 3,50986056   | 37,34364852  | 3,21E-305 | 7,38E-303  | 1,80E-303  | TRUE |
| Rv0684  | 708  | 756  | -0,094636874 | -0,584776314 | -7,815101731 | 5,49E-15  | 3,17E-14   | 7,75E-15   | TRUE |
| Rv0685  | 301  | 963  | -1,677772311 | -2,167911751 | -24,8482666  | 2,70E-136 | 1,41E-134  | 3,43E-135  | TRUE |
| Rv0695  | 23   | 68   | -1,563900885 | -2,054040325 | -6,37700882  | 1,81E-10  | 7,97E-10   | 1,95E-10   | TRUE |
| Rv0700  | 348  | 501  | -0,525723297 | -1,015862737 | -10,25258046 | 1,15E-24  | 1,02E-23   | 2,49E-24   | TRUE |
| Rv0701  | 207  | 621  | -1,584962501 | -2,075101941 | -19,40521116 | 6,97E-84  | 2,06E-82   | 5,04E-83   | TRUE |
| Rv0702  | 78   | 306  | -1,971985624 | -2,462125064 | -15,11027173 | 1,39E-51  | 2,43E-50   | 5,93E-51   | TRUE |
| Rv0703  | 81   | 118  | -0,542793046 | -1,032932487 | -5,042461451 | 4,60E-07  | 1,55E-06   | 3,78E-07   | TRUE |
| Rv0704  | 105  | 454  | -2,11230297  | -2,60244241  | -18,98818754 | 2,14E-80  | 5,75E-79   | 1,41E-79   | TRUE |
| Rv0705  | 97   | 382  | -1,977515986 | -2,467655426 | -16,90522886 | 4,12E-64  | 8,98E-63   | 2,19E-63   | TRUE |
| Rv0706  | 36   | 86   | -1,256339753 | -1,746479193 | -6,431626561 | 1,26E-10  | 5,63E-10   | 1,38E-10   | TRUE |
| Rv0707  | 117  | 145  | -0,30954437  | -0,79968381  | -4,506116555 | 6,60E-06  | 1,94E-05   | 4,75E-06   | TRUE |

|         |      |     |              |              |              |           |            |            |      |
|---------|------|-----|--------------|--------------|--------------|-----------|------------|------------|------|
| Rv0708  | 93   | 230 | -1,30633124  | -1,79647068  | -10,72696187 | 7,61E-27  | 7,28E-26   | 1,78E-26   | TRUE |
| Rv0709  | 69   | 340 | -2,300866479 | -2,791005919 | -17,05494147 | 3,21E-65  | 7,13E-64   | 1,74E-64   | TRUE |
| Rv0710  | 48   | 187 | -1,961931959 | -2,452071399 | -11,78368588 | 4,74E-32  | 5,10E-31   | 1,25E-31   | TRUE |
| Rv0712  | 56   | 10  | 2,485426827  | 1,995287387  | 4,791738808  | 1,65E-06  | 5,30E-06   | 1,29E-06   | TRUE |
| Rv0713  | 40   | 8   | 2,321928095  | 1,831788655  | 3,824727988  | 0,000131  | 0,00033089 | 8,09E-05   | TRUE |
| Rv0715  | 53   | 124 | -1,226275856 | -1,716415296 | -7,629868371 | 2,35E-14  | 1,30E-13   | 3,17E-14   | TRUE |
| Rv0716  | 41   | 113 | -1,462626958 | -1,952766398 | -7,953887479 | 1,81E-15  | 1,06E-14   | 2,59E-15   | TRUE |
| Rv0718  | 26   | 179 | -2,783376059 | -3,273515499 | -13,34856714 | 1,21E-40  | 1,70E-39   | 4,14E-40   | TRUE |
| Rv0721  | 145  | 217 | -0,581642142 | -1,071781582 | -7,048280701 | 1,81E-12  | 8,94E-12   | 2,19E-12   | TRUE |
| Rv0722  | 74   | 133 | -0,84582907  | -1,33596851  | -6,56971756  | 5,04E-11  | 2,30E-10   | 5,61E-11   | TRUE |
| Rv0724  | 432  | 716 | -0,728928275 | -1,219067715 | -14,20177085 | 8,93E-46  | 1,42E-44   | 3,48E-45   | TRUE |
| Rv0725c | 18   | 1   | 4,169925001  | 3,679785561  | 3,741720075  | 0,000183  | 0,00045386 | 0,00011073 | TRUE |
| Rv0728c | 11   | 26  | -1,2410081   | -1,73114754  | -3,514493801 | 0,000441  | 0,00103334 | 0,0002525  | TRUE |
| Rv0730  | 38   | 65  | -0,77444403  | -1,26457974  | -4,401235008 | 1,08E-05  | 3,10E-05   | 7,57E-06   | TRUE |
| Rv0732  | 18   | 45  | -1,321928095 | -1,812067535 | -4,772421364 | 1,82E-06  | 5,80E-06   | 1,42E-06   | TRUE |
| Rv0740  | 65   | 16  | 2,022367813  | 1,532228373  | 4,295630682  | 1,74E-05  | 4,89E-05   | 1,19E-05   | TRUE |
| Rv0741  | 29   | 5   | 2,5360529    | 2,04591346   | 3,50480564   | 0,000457  | 0,00107008 | 0,00026124 | TRUE |
| Rv0743c | 66   | 2   | 5,044394119  | 4,554254679  | 7,620705697  | 2,52E-14  | 1,39E-13   | 3,39E-14   | TRUE |
| Rv0744c | 121  | 26  | 2,218423519  | 1,728284079  | 6,390166964  | 1,66E-10  | 7,32E-10   | 1,79E-10   | TRUE |
| Rv0747  | 80   | 98  | -0,292781749 | -0,782921189 | -3,637233646 | 0,000276  | 0,00067091 | 0,00016394 | TRUE |
| Rv0751c | 243  | 46  | 2,401250548  | 1,911111108  | 9,701970802  | 2,96E-22  | 2,37E-21   | 5,79E-22   | TRUE |
| Rv0752c | 846  | 41  | 4,366961849  | 3,876822408  | 26,1239594   | 1,95E-150 | 1,15E-148  | 2,82E-149  | TRUE |
| Rv0753c | 1787 | 261 | 2,775417922  | 2,285278482  | 29,50606901  | 2,41E-191 | 2,09E-189  | 5,10E-190  | TRUE |
| Rv0754  | 522  | 23  | 4,504344041  | 4,0142046    | 20,74598566  | 1,33E-95  | 4,41E-94   | 1,08E-94   | TRUE |
| Rv0755A | 155  | 45  | 1,784271309  | 1,294131869  | 5,838968455  | 5,25E-09  | 2,10E-08   | 5,13E-09   | TRUE |
| Rv0755c | 540  | 130 | 2,054447784  | 1,564308344  | 12,57395183  | 2,94E-36  | 3,56E-35   | 8,70E-36   | TRUE |
| Rv0757  | 366  | 99  | 1,886343218  | 1,396203778  | 9,511621015  | 1,88E-21  | 1,46E-20   | 3,56E-21   | TRUE |
| Rv0758  | 333  | 167 | 0,995674075  | 0,505534635  | 3,833462419  | 0,000126  | 0,00031998 | 7,82E-05   | TRUE |
| Rv0762c | 54   | 5   | 3,432959407  | 2,942819967  | 5,889000323  | 3,89E-09  | 1,57E-08   | 3,83E-09   | TRUE |
| Rv0763c | 25   | 1   | 4,64385619   | 4,15371675   | 4,585143448  | 4,54E-06  | 1,37E-05   | 3,34E-06   | TRUE |
| Rv0764c | 521  | 39  | 3,739737343  | 3,249597903  | 19,15610471  | 8,61E-82  | 2,40E-80   | 5,87E-81   | TRUE |
| Rv0766c | 308  | 12  | 4,68182404   | 4,1916846    | 16,13546225  | 1,44E-58  | 2,78E-57   | 6,79E-58   | TRUE |
| Rv0767c | 275  | 89  | 1,627554377  | 1,137414937  | 7,024392453  | 2,15E-12  | 1,06E-11   | 2,58E-12   | TRUE |
| Rv0768  | 548  | 34  | 4,010569242  | 3,520429802  | 20,30763892  | 1,10E-91  | 3,44E-90   | 8,40E-91   | TRUE |
| Rv0769  | 131  | 17  | 2,94596016   | 2,45582072   | 8,328744144  | 8,17E-17  | 5,10E-16   | 1,25E-16   | TRUE |
| Rv0770  | 59   | 0   | 6,882643049  | 6,392503609  | 7,354577957  | 1,92E-13  | 1,00E-12   | 2,45E-13   | TRUE |
| Rv0774c | 2    | 12  | -2,584962501 | -3,075101941 | -3,3600313   | 0,000779  | 0,00175205 | 0,00042788 | TRUE |

|         |      |     |              |              |              |           |            |            |      |
|---------|------|-----|--------------|--------------|--------------|-----------|------------|------------|------|
| Rv0775  | 73   | 22  | 1,73039294   | 1,2402535    | 3,876109021  | 0,000106  | 0,00027179 | 6,64E-05   | TRUE |
| Rv0777  | 71   | 206 | -1,536753408 | -2,026892848 | -11,005329   | 3,60E-28  | 3,57E-27   | 8,72E-28   | TRUE |
| Rv0778  | 21   | 91  | -2,115477217 | -2,605616657 | -8,50504681  | 1,82E-17  | 1,17E-16   | 2,86E-17   | TRUE |
| Rv0782  | 41   | 97  | -1,242360838 | -1,732500278 | -6,79239924  | 1,10E-11  | 5,24E-11   | 1,28E-11   | TRUE |
| Rv0783c | 71   | 96  | -0,435215381 | -0,925354821 | -4,151086063 | 3,31E-05  | 8,99E-05   | 2,20E-05   | TRUE |
| Rv0788  | 49   | 89  | -0,861023587 | -1,351163027 | -5,420842668 | 5,93E-08  | 2,16E-07   | 5,29E-08   | TRUE |
| Rv0790c | 308  | 100 | 1,622930351  | 1,132790911  | 7,409799053  | 1,26E-13  | 6,70E-13   | 1,64E-13   | TRUE |
| Rv0791c | 983  | 26  | 5,240607888  | 4,750468448  | 29,6571276   | 2,74E-193 | 2,44E-191  | 5,95E-192  | TRUE |
| Rv0792c | 1354 | 237 | 2,514268775  | 2,024129335  | 23,79856767  | 3,46E-125 | 1,65E-123  | 4,02E-124  | TRUE |
| Rv0793  | 82   | 2   | 5,357552005  | 4,867412565  | 8,598925655  | 8,05E-18  | 5,32E-17   | 1,30E-17   | TRUE |
| Rv0796  | 26   | 54  | -1,054447784 | -1,544587224 | -4,667690039 | 3,05E-06  | 9,42E-06   | 2,30E-06   | TRUE |
| Rv0802c | 42   | 63  | -0,584962501 | -1,075101941 | -3,806730259 | 0,000141  | 0,00035499 | 8,67E-05   | TRUE |
| Rv0805  | 230  | 445 | -0,952171475 | -1,442310915 | -12,74014505 | 3,54E-37  | 4,51E-36   | 1,10E-36   | TRUE |
| Rv0808  | 459  | 126 | 1,86507042   | 1,37493098   | 10,52880864  | 6,36E-26  | 5,86E-25   | 1,43E-25   | TRUE |
| Rv0809  | 37   | 59  | -0,673189684 | -1,163329124 | -3,92571349  | 8,65E-05  | 0,00022333 | 5,46E-05   | TRUE |
| Rv0810c | 94   | 133 | -0,500693584 | -0,990833024 | -5,172869074 | 2,31E-07  | 8,01E-07   | 1,96E-07   | TRUE |
| Rv0812  | 24   | 78  | -1,700439718 | -2,190579158 | -7,113546843 | 1,13E-12  | 5,66E-12   | 1,38E-12   | TRUE |
| Rv0814c | 59   | 76  | -0,365284464 | -0,855423904 | -3,455896985 | 0,000548  | 0,00126581 | 0,00030931 | TRUE |
| Rv0815c | 55   | 74  | -0,428093652 | -0,918233092 | -3,620869851 | 0,000294  | 0,00070863 | 0,00017316 | TRUE |
| Rv0822c | 126  | 29  | 2,119298928  | 1,629159488  | 6,253388103  | 4,02E-10  | 1,74E-09   | 4,25E-10   | TRUE |
| Rv0823c | 739  | 133 | 2,474148119  | 1,984008679  | 17,34833491  | 2,03E-67  | 4,64E-66   | 1,13E-66   | TRUE |
| Rv0824c | 1236 | 250 | 2,305678743  | 1,815539303  | 21,14514213  | 3,06E-99  | 1,07E-97   | 2,61E-98   | TRUE |
| Rv0825c | 25   | 2   | 3,64385619   | 3,15371675   | 4,139971022  | 3,47E-05  | 9,40E-05   | 2,30E-05   | TRUE |
| Rv0826  | 171  | 6   | 4,832890014  | 4,342750574  | 12,13379672  | 6,99E-34  | 7,87E-33   | 1,92E-33   | TRUE |
| Rv0827c | 269  | 29  | 3,213481367  | 2,723341927  | 12,63612069  | 1,33E-36  | 1,65E-35   | 4,04E-36   | TRUE |
| Rv0829  | 1    | 40  | -5,321928095 | -5,812067535 | -7,215681918 | 5,37E-13  | 2,74E-12   | 6,70E-13   | TRUE |
| Rv0830  | 121  | 39  | 1,633461018  | 1,143321578  | 4,678372448  | 2,89E-06  | 8,98E-06   | 2,19E-06   | TRUE |
| Rv0834c | 382  | 164 | 1,219876823  | 0,729737383  | 5,700999288  | 1,19E-08  | 4,60E-08   | 1,12E-08   | TRUE |
| Rv0835  | 54   | 8   | 2,754887502  | 2,264748062  | 5,097180599  | 3,45E-07  | 1,18E-06   | 2,88E-07   | TRUE |
| Rv0836c | 72   | 0   | 7,169925001  | 6,679785561  | 8,077365014  | 6,62E-16  | 3,98E-15   | 9,72E-16   | TRUE |
| Rv0837c | 488  | 15  | 5,023846742  | 4,533707302  | 20,70398027  | 3,19E-95  | 1,05E-93   | 2,56E-94   | TRUE |
| Rv0838  | 32   | 6   | 2,415037499  | 1,924898059  | 3,537273632  | 0,000404  | 0,00095738 | 0,0002338  | TRUE |
| Rv0840c | 319  | 42  | 2,925095191  | 2,434955751  | 12,93419005  | 2,89E-38  | 3,77E-37   | 9,21E-38   | TRUE |
| Rv0846c | 165  | 37  | 2,156868849  | 1,666729409  | 7,273698298  | 3,50E-13  | 1,81E-12   | 4,42E-13   | TRUE |
| Rv0847  | 1014 | 396 | 1,356485317  | 0,866345877  | 10,77407787  | 4,56E-27  | 4,41E-26   | 1,08E-26   | TRUE |
| Rv0848  | 202  | 273 | -0,434545658 | -0,924685098 | -6,997162698 | 2,61E-12  | 1,28E-11   | 3,13E-12   | TRUE |
| Rv0849  | 154  | 11  | 3,807354922  | 3,317215482  | 10,50634677  | 8,08E-26  | 7,40E-25   | 1,81E-25   | TRUE |

|         |     |     |              |              |              |           |            |            |      |
|---------|-----|-----|--------------|--------------|--------------|-----------|------------|------------|------|
| Rv0850  | 14  | 33  | -1,237039197 | -1,727178637 | -3,953095494 | 7,71E-05  | 0,00019977 | 4,88E-05   | TRUE |
| Rv0857  | 55  | 13  | 2,080919995  | 1,590780555  | 4,060963102  | 4,89E-05  | 0,00013031 | 3,18E-05   | TRUE |
| Rv0859  | 171 | 79  | 1,114071767  | 0,623932327  | 3,321098113  | 0,000897  | 0,00199055 | 0,0004864  | TRUE |
| Rv0860  | 546 | 736 | -0,430804815 | -0,920944255 | -11,4553034  | 2,21E-30  | 2,32E-29   | 5,67E-30   | TRUE |
| Rv0861c | 73  | 194 | -1,410088283 | -1,900227723 | -10,23473606 | 1,39E-24  | 1,22E-23   | 2,97E-24   | TRUE |
| Rv0863  | 45  | 9   | 2,321928095  | 1,831788655  | 4,056747417  | 4,98E-05  | 0,00013228 | 3,23E-05   | TRUE |
| Rv0869c | 62  | 20  | 1,632268215  | 1,142128775  | 3,345932109  | 0,00082   | 0,00183411 | 0,00044818 | TRUE |
| Rv0872c | 225 | 299 | -0,410220483 | -0,900359923 | -7,160475377 | 8,04E-13  | 4,06E-12   | 9,92E-13   | TRUE |
| Rv0873  | 194 | 42  | 2,207595419  | 1,717455979  | 8,056073039  | 7,88E-16  | 4,72E-15   | 1,15E-15   | TRUE |
| Rv0876c | 216 | 88  | 1,295455884  | 0,805316443  | 4,668746083  | 3,03E-06  | 9,39E-06   | 2,29E-06   | TRUE |
| Rv0884c | 125 | 52  | 1,265344567  | 0,775205126  | 3,43648954   | 0,000589  | 0,00135447 | 0,00033097 | TRUE |
| Rv0885  | 515 | 510 | 0,014075185  | -0,476064255 | -5,323568623 | 1,02E-07  | 3,64E-07   | 8,89E-08   | TRUE |
| Rv0886  | 149 | 63  | 1,241888597  | 0,751749157  | 3,653281139  | 0,000259  | 0,00063388 | 0,00015489 | TRUE |
| Rv0888  | 14  | 45  | -1,684498174 | -2,174637614 | -5,378528158 | 7,51E-08  | 2,72E-07   | 6,64E-08   | TRUE |
| Rv0896  | 182 | 205 | -0,171685459 | -0,661824899 | -4,541794928 | 5,58E-06  | 1,66E-05   | 4,05E-06   | TRUE |
| Rv0897c | 54  | 13  | 2,054447784  | 1,564308344  | 3,975106541  | 7,03E-05  | 0,00018375 | 4,49E-05   | TRUE |
| Rv0898c | 57  | 11  | 2,373458396  | 1,883318955  | 4,652454617  | 3,28E-06  | 1,01E-05   | 2,47E-06   | TRUE |
| Rv0900  | 10  | 35  | -1,807354922 | -2,297494362 | -4,905797105 | 9,30E-07  | 3,06E-06   | 7,47E-07   | TRUE |
| Rv0903c | 191 | 21  | 3,185111405  | 2,694971965  | 10,58835638  | 3,37E-26  | 3,14E-25   | 7,67E-26   | TRUE |
| Rv0907  | 4   | 18  | -2,169925001 | -2,660064441 | -3,825235052 | 0,000131  | 0,00033043 | 8,07E-05   | TRUE |
| Rv0910  | 42  | 143 | -1,767553914 | -2,257693354 | -9,812501275 | 9,95E-23  | 8,19E-22   | 2,00E-22   | TRUE |
| Rv0913c | 29  | 144 | -2,311944006 | -2,802083446 | -11,12072202 | 9,95E-29  | 1,00E-27   | 2,45E-28   | TRUE |
| Rv0914c | 76  | 8   | 3,247927513  | 2,757788073  | 6,760486804  | 1,38E-11  | 6,49E-11   | 1,59E-11   | TRUE |
| Rv0917  | 125 | 21  | 2,573466862  | 2,083327422  | 7,361981983  | 1,81E-13  | 9,50E-13   | 2,32E-13   | TRUE |
| Rv0918  | 30  | 5   | 2,584962501  | 2,094823061  | 3,619136355  | 0,000296  | 0,00071273 | 0,00017411 | TRUE |
| Rv0919  | 98  | 15  | 2,707819249  | 2,217679808  | 6,779168342  | 1,21E-11  | 5,73E-11   | 1,40E-11   | TRUE |
| Rv0921  | 219 | 47  | 2,220198208  | 1,730058768  | 8,60353928   | 7,73E-18  | 5,12E-17   | 1,25E-17   | TRUE |
| Rv0922  | 156 | 64  | 1,285402219  | 0,795262779  | 3,924793438  | 8,68E-05  | 0,00022404 | 5,47E-05   | TRUE |
| Rv0925c | 6   | 25  | -2,058893689 | -2,549033129 | -4,403855696 | 1,06E-05  | 3,06E-05   | 7,48E-06   | TRUE |
| Rv0926c | 16  | 51  | -1,672425342 | -2,162564782 | -5,706040724 | 1,16E-08  | 4,47E-08   | 1,09E-08   | TRUE |
| Rv0931c | 267 | 937 | -1,811209306 | -2,301348746 | -25,42328831 | 1,39E-142 | 7,89E-141  | 1,93E-141  | TRUE |
| Rv0935  | 62  | 19  | 1,706268797  | 1,216129357  | 3,517323105  | 0,000436  | 0,00102547 | 0,00025058 | TRUE |
| Rv0939  | 86  | 237 | -1,462478494 | -1,952617934 | -11,51943241 | 1,05E-30  | 1,11E-29   | 2,72E-30   | TRUE |
| Rv0940c | 158 | 17  | 3,216317907  | 2,726178467  | 9,689156785  | 3,35E-22  | 2,67E-21   | 6,53E-22   | TRUE |
| Rv0941c | 62  | 11  | 2,494764692  | 2,004625252  | 5,057329238  | 4,25E-07  | 1,43E-06   | 3,50E-07   | TRUE |
| Rv0946c | 25  | 67  | -1,422233001 | -1,912372441 | -6,039844474 | 1,54E-09  | 6,37E-09   | 1,56E-09   | TRUE |
| Rv0949  | 46  | 68  | -0,563900885 | -1,054040325 | -3,891627166 | 9,96E-05  | 0,00025514 | 6,23E-05   | TRUE |



|         |      |      |              |              |              |           |            |            |      |
|---------|------|------|--------------|--------------|--------------|-----------|------------|------------|------|
| Rv0953c | 36   | 93   | -1,36923381  | -1,85937325  | -6,982665728 | 2,90E-12  | 1,41E-11   | 3,45E-12   | TRUE |
| Rv0954  | 97   | 194  | -1           | -1,49013944  | -8,617266043 | 6,86E-18  | 4,55E-17   | 1,11E-17   | TRUE |
| Rv0955  | 62   | 109  | -0,813988014 | -1,304127454 | -5,83774947  | 5,29E-09  | 2,11E-08   | 5,16E-09   | TRUE |
| Rv0958  | 53   | 80   | -0,59400764  | -1,08414708  | -4,319084702 | 1,57E-05  | 4,41E-05   | 1,08E-05   | TRUE |
| Rv0959A | 24   | 59   | -1,297680549 | -1,787819989 | -5,414239686 | 6,15E-08  | 2,24E-07   | 5,47E-08   | TRUE |
| Rv0960  | 17   | 318  | -4,225420114 | -4,715559554 | -19,96267033 | 1,16E-88  | 3,58E-87   | 8,74E-88   | TRUE |
| Rv0967  | 2408 | 388  | 2,633706835  | 2,143567395  | 32,93720367  | 6,45E-238 | 8,40E-236  | 2,05E-236  | TRUE |
| Rv0968  | 1984 | 46   | 5,430634354  | 4,940494914  | 42,40622896  | 0         | 0          | 0          | TRUE |
| Rv0969  | 2355 | 137  | 4,103479262  | 3,613339821  | 42,54105693  | 0         | 0          | 0          | TRUE |
| Rv0970  | 282  | 9    | 4,969626351  | 4,479486911  | 15,69660132  | 1,60E-55  | 2,98E-54   | 7,29E-55   | TRUE |
| Rv0971c | 15   | 1    | 3,906890596  | 3,416751156  | 3,319453818  | 0,000902  | 0,00199607 | 0,00048679 | TRUE |
| Rv0979c | 17   | 0    | 5,087462841  | 4,597323401  | 3,875161076  | 0,000107  | 0,00027267 | 6,66E-05   | TRUE |
| Rv0980c | 56   | 3    | 4,222392421  | 3,732252981  | 6,633359691  | 3,28E-11  | 1,51E-10   | 3,70E-11   | TRUE |
| Rv0981  | 208  | 90   | 1,208586622  | 0,718447182  | 4,149257119  | 3,34E-05  | 9,04E-05   | 2,21E-05   | TRUE |
| Rv0983  | 1843 | 197  | 3,225788536  | 2,735649096  | 33,17399067  | 2,55E-241 | 3,56E-239  | 8,70E-240  | TRUE |
| Rv0984  | 798  | 243  | 1,715432433  | 1,225292993  | 12,6998306   | 5,93E-37  | 7,51E-36   | 1,84E-36   | TRUE |
| Rv0985c | 92   | 7    | 3,716207034  | 3,226067594  | 8,022994345  | 1,03E-15  | 6,12E-15   | 1,50E-15   | TRUE |
| Rv0986  | 66   | 12   | 2,459431619  | 1,969292179  | 5,157442969  | 2,50E-07  | 8,68E-07   | 2,12E-07   | TRUE |
| Rv0989c | 337  | 14   | 4,589249859  | 4,099110419  | 16,77231446  | 3,89E-63  | 8,39E-62   | 2,05E-62   | TRUE |
| Rv0990c | 483  | 178  | 1,440145948  | 0,950006508  | 8,033376104  | 9,48E-16  | 5,64E-15   | 1,38E-15   | TRUE |
| Rv0991c | 1209 | 1064 | 0,184316094  | -0,305823346 | -5,091277803 | 3,56E-07  | 1,21E-06   | 2,96E-07   | TRUE |
| Rv0994  | 75   | 121  | -0,690044547 | -1,180183987 | -5,687075306 | 1,29E-08  | 4,97E-08   | 1,21E-08   | TRUE |
| Rv0995  | 21   | 66   | -1,652076697 | -2,142216137 | -6,452852873 | 1,10E-10  | 4,91E-10   | 1,20E-10   | TRUE |
| Rv0996  | 347  | 32   | 3,438791853  | 2,948652413  | 14,94432362  | 1,70E-50  | 2,92E-49   | 7,13E-50   | TRUE |
| Rv1005c | 37   | 63   | -0,767826558 | -1,257965998 | -4,315268669 | 1,59E-05  | 4,48E-05   | 1,10E-05   | TRUE |
| Rv1006  | 133  | 340  | -1,354108501 | -1,844247941 | -13,27975646 | 3,03E-40  | 4,17E-39   | 1,02E-39   | TRUE |
| Rv1010  | 26   | 4    | 2,700439718  | 2,210300278  | 3,484523047  | 0,000493  | 0,00114939 | 0,00028069 | TRUE |
| Rv1020  | 105  | 32   | 1,714245518  | 1,224106078  | 4,601105995  | 4,20E-06  | 1,27E-05   | 3,11E-06   | TRUE |
| Rv1023  | 58   | 12   | 2,273018494  | 1,782879054  | 4,52081013   | 6,16E-06  | 1,82E-05   | 4,44E-06   | TRUE |
| Rv1038c | 28   | 4    | 2,807354922  | 2,317215482  | 3,721387151  | 0,000198  | 0,00048922 | 0,00011951 | TRUE |
| Rv1039c | 25   | 74   | -1,565597176 | -2,055736616 | -6,655965393 | 2,81E-11  | 1,31E-10   | 3,19E-11   | TRUE |
| Rv1041c | 108  | 201  | -0,896164189 | -1,386303629 | -8,308407312 | 9,70E-17  | 6,04E-16   | 1,48E-16   | TRUE |
| Rv1043c | 76   | 9    | 3,078002512  | 2,587863072  | 6,533520765  | 6,42E-11  | 2,91E-10   | 7,12E-11   | TRUE |
| Rv1046c | 380  | 77   | 2,303069068  | 1,812929628  | 11,70755562  | 1,17E-31  | 1,25E-30   | 3,06E-31   | TRUE |
| Rv1047  | 74   | 123  | -0,73306114  | -1,22320058  | -5,898744183 | 3,66E-09  | 1,48E-08   | 3,62E-09   | TRUE |
| Rv1048c | 462  | 43   | 3,425484287  | 2,935344847  | 17,2063165   | 2,38E-66  | 5,37E-65   | 1,31E-65   | TRUE |
| Rv1049  | 25   | 1    | 4,64385619   | 4,15371675   | 4,585143448  | 4,54E-06  | 1,37E-05   | 3,34E-06   | TRUE |

|         |      |     |              |              |              |           |            |            |      |
|---------|------|-----|--------------|--------------|--------------|-----------|------------|------------|------|
| Rv1052  | 52   | 162 | -1,639410285 | -2,129549725 | -10,07263699 | 7,30E-24  | 6,31E-23   | 1,54E-23   | TRUE |
| Rv1057  | 18   | 200 | -3,473931188 | -3,964070628 | -15,15920489 | 6,59E-52  | 1,16E-50   | 2,84E-51   | TRUE |
| Rv1060  | 39   | 5   | 2,963474124  | 2,473334684  | 4,562755644  | 5,05E-06  | 1,51E-05   | 3,69E-06   | TRUE |
| Rv1061  | 57   | 5   | 3,510961919  | 3,020822479  | 6,127362787  | 8,93E-10  | 3,77E-09   | 9,21E-10   | TRUE |
| Rv1062  | 13   | 38  | -1,547487795 | -2,037627235 | -4,742380602 | 2,11E-06  | 6,67E-06   | 1,63E-06   | TRUE |
| Rv1063c | 62   | 77  | -0,31259023  | -0,80272967  | -3,294230804 | 0,000987  | 0,00216511 | 0,00052906 | TRUE |
| Rv1065  | 179  | 835 | -2,22181661  | -2,71195605  | -26,33573623 | 7,48E-153 | 4,63E-151  | 1,13E-151  | TRUE |
| Rv1066  | 39   | 221 | -2,502500341 | -2,992639781 | -14,2362307  | 5,46E-46  | 8,74E-45   | 2,13E-45   | TRUE |
| Rv1071c | 48   | 7   | 2,777607579  | 2,287468139  | 4,834792004  | 1,33E-06  | 4,32E-06   | 1,06E-06   | TRUE |
| Rv1072  | 3057 | 731 | 2,064173241  | 1,574033801  | 30,09664141  | 5,36E-199 | 5,23E-197  | 1,28E-197  | TRUE |
| Rv1073  | 944  | 151 | 2,64423831   | 2,15409887   | 20,67169713  | 6,23E-95  | 2,03E-93   | 4,95E-94   | TRUE |
| Rv1074c | 98   | 113 | -0,205469118 | -0,695608558 | -3,523090444 | 0,000427  | 0,00100462 | 0,00024549 | TRUE |
| Rv1075c | 22   | 1   | 4,459431619  | 3,969292179  | 4,243748384  | 2,20E-05  | 6,09E-05   | 1,49E-05   | TRUE |
| Rv1076  | 43   | 9   | 2,256339753  | 1,766200313  | 3,867286197  | 0,00011   | 0,0002807  | 6,85E-05   | TRUE |
| Rv1078  | 18   | 43  | -1,256339753 | -1,746479193 | -4,547696497 | 5,42E-06  | 1,62E-05   | 3,95E-06   | TRUE |
| Rv1080c | 625  | 177 | 1,820106829  | 1,329967389  | 11,97855356  | 4,60E-33  | 5,02E-32   | 1,23E-32   | TRUE |
| Rv1082  | 83   | 126 | -0,602240492 | -1,092379932 | -5,454024534 | 4,92E-08  | 1,81E-07   | 4,42E-08   | TRUE |
| Rv1084  | 12   | 26  | -1,115477217 | -1,605616657 | -3,331333345 | 0,000864  | 0,0019226  | 0,00046965 | TRUE |
| Rv1087  | 29   | 87  | -1,584962501 | -2,075101941 | -7,260610238 | 3,85E-13  | 1,98E-12   | 4,84E-13   | TRUE |
| Rv1093  | 57   | 87  | -0,610053482 | -1,100192922 | -4,558082298 | 5,16E-06  | 1,54E-05   | 3,77E-06   | TRUE |
| Rv1094  | 349  | 381 | -0,126563961 | -0,616703401 | -5,816082394 | 6,02E-09  | 2,39E-08   | 5,84E-09   | TRUE |
| Rv1096  | 20   | 70  | -1,807354922 | -2,297494362 | -6,937998941 | 3,98E-12  | 1,93E-11   | 4,71E-12   | TRUE |
| Rv1102c | 16   | 1   | 4            | 3,50986056   | 3,465376216  | 0,000529  | 0,00122564 | 0,00029914 | TRUE |
| Rv1106c | 50   | 13  | 1,943416472  | 1,453277032  | 3,62258318   | 0,000292  | 0,00070526 | 0,00017223 | TRUE |
| Rv1108c | 47   | 12  | 1,969626351  | 1,479486911  | 3,559357578  | 0,000372  | 0,00088845 | 0,0002171  | TRUE |
| Rv1109c | 34   | 6   | 2,502500341  | 2,0123609    | 3,754475262  | 0,000174  | 0,00043371 | 0,00010591 | TRUE |
| Rv1110  | 208  | 61  | 1,769702381  | 1,279562941  | 6,70496497   | 2,01E-11  | 9,46E-11   | 2,31E-11   | TRUE |
| Rv1113  | 9    | 36  | -2           | -2,49013944  | -5,215520675 | 1,83E-07  | 6,43E-07   | 1,57E-07   | TRUE |
| Rv1114  | 21   | 1   | 4,392317423  | 3,902177983  | 4,123753811  | 3,73E-05  | 0,00010052 | 2,46E-05   | TRUE |
| Rv1122  | 12   | 95  | -2,984893108 | -3,475032548 | -9,968526587 | 2,09E-23  | 1,79E-22   | 4,37E-23   | TRUE |
| Rv1123c | 17   | 80  | -2,234465254 | -2,724604694 | -8,16837591  | 3,13E-16  | 1,91E-15   | 4,66E-16   | TRUE |
| Rv1126c | 17   | 37  | -1,121990524 | -1,612129964 | -3,985695487 | 6,73E-05  | 0,0001761  | 4,30E-05   | TRUE |
| Rv1127c | 44   | 61  | -0,471305719 | -0,961445159 | -3,416452077 | 0,000634  | 0,00144964 | 0,00035423 | TRUE |
| Rv1128c | 26   | 544 | -4,387023123 | -4,877162563 | -26,26032546 | 5,45E-152 | 3,32E-150  | 8,12E-151  | TRUE |
| Rv1129c | 35   | 78  | -1,156119202 | -1,646258642 | -5,874814335 | 4,23E-09  | 1,71E-08   | 4,17E-09   | TRUE |
| Rv1130  | 702  | 677 | 0,052315197  | -0,437824243 | -5,679571085 | 1,35E-08  | 5,18E-08   | 1,27E-08   | TRUE |
| Rv1133c | 156  | 360 | -1,206450877 | -1,696590318 | -12,8968746  | 4,69E-38  | 6,10E-37   | 1,49E-37   | TRUE |

|         |      |      |              |              |              |           |            |            |      |
|---------|------|------|--------------|--------------|--------------|-----------|------------|------------|------|
| Rv1135c | 27   | 3    | 3,169925001  | 2,679785561  | 3,968756079  | 7,22E-05  | 0,00018828 | 4,60E-05   | TRUE |
| Rv1140  | 14   | 132  | -3,237039197 | -3,727178637 | -12,06441699 | 1,63E-33  | 1,81E-32   | 4,41E-33   | TRUE |
| Rv1141c | 19   | 45   | -1,243925583 | -1,734065023 | -4,629141499 | 3,67E-06  | 1,12E-05   | 2,74E-06   | TRUE |
| Rv1146  | 26   | 137  | -2,397592365 | -2,887731805 | -11,01386085 | 3,28E-28  | 3,26E-27   | 7,96E-28   | TRUE |
| Rv1147  | 2    | 62   | -4,95419631  | -5,44433575  | -8,968803996 | 3,00E-19  | 2,12E-18   | 5,17E-19   | TRUE |
| Rv1149  | 302  | 599  | -0,988007453 | -1,478146894 | -15,05649767 | 3,13E-51  | 5,46E-50   | 1,33E-50   | TRUE |
| Rv1151c | 40   | 78   | -0,963474124 | -1,453613564 | -5,363458102 | 8,16E-08  | 2,94E-07   | 7,19E-08   | TRUE |
| Rv1154c | 14   | 49   | -1,807354922 | -2,297494362 | -5,804668999 | 6,45E-09  | 2,55E-08   | 6,24E-09   | TRUE |
| Rv1155  | 45   | 6    | 2,906890596  | 2,416751156  | 4,836261985  | 1,32E-06  | 4,29E-06   | 1,05E-06   | TRUE |
| Rv1156  | 210  | 100  | 1,070389328  | 0,580249888  | 3,448840462  | 0,000563  | 0,00129782 | 0,00031713 | TRUE |
| Rv1159  | 44   | 10   | 2,137503524  | 1,647364084  | 3,724706433  | 0,000196  | 0,00048359 | 0,00011817 | TRUE |
| Rv1161  | 1648 | 2313 | -0,489049023 | -0,979188463 | -21,40854681 | 1,11E-101 | 3,98E-100  | 9,74E-101  | TRUE |
| Rv1162  | 276  | 775  | -1,489528043 | -1,979667483 | -21,02868238 | 3,58E-98  | 1,23E-96   | 3,00E-97   | TRUE |
| Rv1165  | 15   | 41   | -1,450661409 | -1,940800849 | -4,771347097 | 1,83E-06  | 5,83E-06   | 1,42E-06   | TRUE |
| Rv1167c | 170  | 37   | 2,199937571  | 1,70979813   | 7,517559482  | 5,58E-14  | 3,01E-13   | 7,36E-14   | TRUE |
| Rv1168c | 1324 | 31   | 5,416491096  | 4,926351656  | 34,62348698  | 1,12E-262 | 1,99E-260  | 4,86E-261  | TRUE |
| Rv1169c | 704  | 57   | 3,626541604  | 3,136402164  | 21,91923664  | 1,70E-106 | 6,27E-105  | 1,53E-105  | TRUE |
| Rv1171  | 43   | 103  | -1,260235772 | -1,750375213 | -7,049695641 | 1,79E-12  | 8,86E-12   | 2,17E-12   | TRUE |
| Rv1173  | 989  | 3922 | -1,987547109 | -2,477686549 | -54,40876651 | 0         | 0          | 0          | TRUE |
| Rv1174c | 292  | 135  | 1,113008962  | 0,622869522  | 4,333682809  | 1,47E-05  | 4,15E-05   | 1,01E-05   | TRUE |
| Rv1175c | 91   | 34   | 1,420331799  | 0,930192359  | 3,424995473  | 0,000615  | 0,00140811 | 0,00034408 | TRUE |
| Rv1178  | 226  | 60   | 1,913288367  | 1,423148927  | 7,582349572  | 3,39E-14  | 1,85E-13   | 4,53E-14   | TRUE |
| Rv1179c | 5    | 97   | -4,277984747 | -4,768124187 | -11,04645225 | 2,28E-28  | 2,27E-27   | 5,55E-28   | TRUE |
| Rv1180  | 26   | 166  | -2,674599713 | -3,164739153 | -12,66399211 | 9,36E-37  | 1,17E-35   | 2,85E-36   | TRUE |
| Rv1181  | 50   | 329  | -2,718087584 | -3,208227024 | -17,93912234 | 5,84E-72  | 1,41E-70   | 3,44E-71   | TRUE |
| Rv1183  | 13   | 89   | -2,775293713 | -3,265433153 | -9,401997878 | 5,35E-21  | 4,09E-20   | 1,00E-20   | TRUE |
| Rv1184c | 16   | 293  | -4,194756854 | -4,684896294 | -19,13862199 | 1,20E-81  | 3,33E-80   | 8,15E-81   | TRUE |
| Rv1185c | 19   | 235  | -3,628589433 | -4,118728873 | -16,62193203 | 4,83E-62  | 1,02E-60   | 2,49E-61   | TRUE |
| Rv1186c | 45   | 161  | -1,839063782 | -2,329203222 | -10,60936398 | 2,70E-26  | 2,52E-25   | 6,17E-26   | TRUE |
| Rv1187  | 22   | 204  | -3,212993723 | -3,703133163 | -14,96392636 | 1,26E-50  | 2,18E-49   | 5,33E-50   | TRUE |
| Rv1194c | 103  | 465  | -2,174586379 | -2,664725819 | -19,46553913 | 2,15E-84  | 6,42E-83   | 1,57E-83   | TRUE |
| Rv1195  | 4    | 24   | -2,584962501 | -3,075101941 | -4,751829479 | 2,02E-06  | 6,39E-06   | 1,56E-06   | TRUE |
| Rv1198  | 89   | 15   | 2,568842835  | 2,078703395  | 6,203119597  | 5,54E-10  | 2,39E-09   | 5,84E-10   | TRUE |
| Rv1199c | 25   | 48   | -0,941106311 | -1,431245751 | -4,158683376 | 3,20E-05  | 8,70E-05   | 2,13E-05   | TRUE |
| Rv1200  | 43   | 9    | 2,256339753  | 1,766200313  | 3,867286197  | 0,00011   | 0,0002807  | 6,85E-05   | TRUE |
| Rv1206  | 63   | 12   | 2,392317423  | 1,902177983  | 4,924070344  | 8,48E-07  | 2,79E-06   | 6,81E-07   | TRUE |
| Rv1210  | 28   | 5    | 2,485426827  | 1,995287387  | 3,388223397  | 0,000703  | 0,00159619 | 0,00038962 | TRUE |

|         |      |      |              |              |              |           |            |            |      |
|---------|------|------|--------------|--------------|--------------|-----------|------------|------------|------|
| Rv1215c | 28   | 45   | -0,684498174 | -1,174637614 | -3,454962323 | 0,00055   | 0,00126946 | 0,0003102  | TRUE |
| Rv1217c | 22   | 72   | -1,710493383 | -2,200632823 | -6,853862312 | 7,19E-12  | 3,45E-11   | 8,43E-12   | TRUE |
| Rv1221  | 5122 | 1888 | 1,439848488  | 0,949709048  | 26,24152805  | 8,93E-152 | 5,37E-150  | 1,31E-150  | TRUE |
| Rv1222  | 1173 | 191  | 2,61855847   | 2,12841903   | 22,87245013  | 8,74E-116 | 3,79E-114  | 9,27E-115  | TRUE |
| Rv1223  | 1924 | 383  | 2,328692502  | 1,838553062  | 26,6194301   | 4,04E-156 | 2,59E-154  | 6,33E-155  | TRUE |
| Rv1225c | 13   | 35   | -1,428843299 | -1,918982739 | -4,37535592  | 1,21E-05  | 3,47E-05   | 8,47E-06   | TRUE |
| Rv1226c | 12   | 402  | -5,06608919  | -5,556228631 | -22,86105264 | 1,13E-115 | 4,87E-114  | 1,19E-114  | TRUE |
| Rv1228  | 113  | 126  | -0,157100961 | -0,647240401 | -3,490743033 | 0,000482  | 0,00112497 | 0,00027489 | TRUE |
| Rv1229c | 79   | 176  | -1,15565087  | -1,645790311 | -8,823659266 | 1,11E-18  | 7,68E-18   | 1,88E-18   | TRUE |
| Rv1232c | 58   | 158  | -1,445799753 | -1,935939193 | -9,351705584 | 8,62E-21  | 6,54E-20   | 1,60E-20   | TRUE |
| Rv1233c | 21   | 86   | -2,033947332 | -2,524086772 | -8,123330138 | 4,54E-16  | 2,75E-15   | 6,73E-16   | TRUE |
| Rv1234  | 85   | 6    | 3,824428435  | 3,334288995  | 7,82232577   | 5,19E-15  | 3,00E-14   | 7,33E-15   | TRUE |
| Rv1238  | 108  | 402  | -1,896164189 | -2,386303629 | -17,00881692 | 7,07E-65  | 1,56E-63   | 3,81E-64   | TRUE |
| Rv1239c | 44   | 159  | -1,853451337 | -2,343590777 | -10,58195326 | 3,61E-26  | 3,35E-25   | 8,19E-26   | TRUE |
| Rv1241  | 40   | 7    | 2,514573173  | 2,024433733  | 4,088181528  | 4,35E-05  | 0,0001166  | 2,85E-05   | TRUE |
| Rv1242  | 31   | 4    | 2,95419631   | 2,46405687   | 4,05919916   | 4,92E-05  | 0,00013103 | 3,20E-05   | TRUE |
| Rv1248c | 559  | 929  | -0,732830314 | -1,222969754 | -16,22082826 | 3,59E-59  | 7,05E-58   | 1,72E-58   | TRUE |
| Rv1249c | 72   | 25   | 1,526068812  | 1,035929372  | 3,331184008  | 0,000865  | 0,00192199 | 0,00046965 | TRUE |
| Rv1250  | 71   | 143  | -1,010124217 | -1,500263657 | -7,435267969 | 1,04E-13  | 5,56E-13   | 1,36E-13   | TRUE |
| Rv1252c | 15   | 1    | 3,906890596  | 3,416751156  | 3,319453818  | 0,000902  | 0,00199607 | 0,00048679 | TRUE |
| Rv1253  | 32   | 99   | -1,62935662  | -2,11949606  | -7,850302729 | 4,15E-15  | 2,42E-14   | 5,90E-15   | TRUE |
| Rv1255c | 105  | 4    | 4,714245518  | 4,224106078  | 9,440308276  | 3,72E-21  | 2,86E-20   | 6,98E-21   | TRUE |
| Rv1256c | 184  | 3    | 5,938599455  | 5,448460015  | 13,03764415  | 7,47E-39  | 9,93E-38   | 2,43E-38   | TRUE |
| Rv1259  | 112  | 26   | 2,106915204  | 1,616775764  | 5,863459546  | 4,53E-09  | 1,82E-08   | 4,45E-09   | TRUE |
| Rv1263  | 33   | 6    | 2,459431619  | 1,969292179  | 3,646801958  | 0,000266  | 0,00064784 | 0,00015816 | TRUE |
| Rv1264  | 135  | 263  | -0,962103392 | -1,452242832 | -9,843222151 | 7,33E-23  | 6,09E-22   | 1,49E-22   | TRUE |
| Rv1274  | 284  | 72   | 1,979822118  | 1,489682678  | 8,795462959  | 1,42E-18  | 9,81E-18   | 2,40E-18   | TRUE |
| Rv1275  | 74   | 23   | 1,68589141   | 1,19575197   | 3,79167181   | 0,00015   | 0,00037674 | 9,21E-05   | TRUE |
| Rv1281c | 37   | 72   | -0,960471636 | -1,450611076 | -5,145050393 | 2,67E-07  | 9,23E-07   | 2,25E-07   | TRUE |
| Rv1282c | 15   | 89   | -2,568842835 | -3,058982275 | -9,128398473 | 6,95E-20  | 5,06E-19   | 1,24E-19   | TRUE |
| Rv1284  | 11   | 93   | -3,079727192 | -3,569866633 | -9,967032266 | 2,12E-23  | 1,81E-22   | 4,42E-23   | TRUE |
| Rv1286  | 1206 | 1377 | -0,191298652 | -0,681438092 | -12,09458007 | 1,13E-33  | 1,26E-32   | 3,08E-33   | TRUE |
| Rv1288  | 63   | 115  | -0,868210127 | -1,358349567 | -6,187190901 | 6,12E-10  | 2,63E-09   | 6,43E-10   | TRUE |
| Rv1290c | 34   | 110  | -1,693896872 | -2,184036312 | -8,43213916  | 3,39E-17  | 2,17E-16   | 5,30E-17   | TRUE |
| Rv1292  | 40   | 10   | 2            | 1,50986056   | 3,333424491  | 0,000858  | 0,00191366 | 0,00046748 | TRUE |
| Rv1293  | 117  | 221  | -0,91753784  | -1,40767728  | -8,8137159   | 1,21E-18  | 8,38E-18   | 2,05E-18   | TRUE |
| Rv1294  | 122  | 342  | -1,487115177 | -1,977254617 | -13,95381368 | 2,98E-44  | 4,60E-43   | 1,12E-43   | TRUE |

|         |      |     |              |              |              |           |            |            |      |
|---------|------|-----|--------------|--------------|--------------|-----------|------------|------------|------|
| Rv1295  | 32   | 73  | -1,189824559 | -1,679963999 | -5,765959407 | 8,12E-09  | 3,19E-08   | 7,79E-09   | TRUE |
| Rv1296  | 241  | 518 | -1,103918951 | -1,594058391 | -14,79795448 | 1,51E-49  | 2,58E-48   | 6,29E-49   | TRUE |
| Rv1297  | 2808 | 847 | 1,729109061  | 1,238969621  | 24,06334807  | 6,05E-128 | 2,99E-126  | 7,31E-127  | TRUE |
| Rv1298  | 555  | 250 | 1,150559677  | 0,660420237  | 6,295051311  | 3,07E-10  | 1,34E-09   | 3,28E-10   | TRUE |
| Rv1299  | 906  | 362 | 1,323521353  | 0,833381913  | 9,852065207  | 6,71E-23  | 5,60E-22   | 1,37E-22   | TRUE |
| Rv1300  | 621  | 262 | 1,245026457  | 0,754887017  | 7,488016085  | 6,99E-14  | 3,76E-13   | 9,18E-14   | TRUE |
| Rv1301  | 169  | 49  | 1,786169592  | 1,296030152  | 6,103953349  | 1,03E-09  | 4,33E-09   | 1,06E-09   | TRUE |
| Rv1302  | 174  | 70  | 1,313660479  | 0,823521039  | 4,271416423  | 1,94E-05  | 5,42E-05   | 1,32E-05   | TRUE |
| Rv1303  | 40   | 9   | 2,152003093  | 1,661863653  | 3,573627395  | 0,000352  | 0,0008432  | 0,00020598 | TRUE |
| Rv1304  | 80   | 7   | 3,514573173  | 3,024433733  | 7,263262718  | 3,78E-13  | 1,95E-12   | 4,76E-13   | TRUE |
| Rv1305  | 51   | 7   | 2,86507042   | 2,37493098   | 5,096314956  | 3,46E-07  | 1,18E-06   | 2,89E-07   | TRUE |
| Rv1306  | 59   | 10  | 2,560714954  | 2,070575514  | 5,037848148  | 4,71E-07  | 1,58E-06   | 3,86E-07   | TRUE |
| Rv1307  | 127  | 153 | -0,268703156 | -0,758842596 | -4,423600089 | 9,71E-06  | 2,81E-05   | 6,87E-06   | TRUE |
| Rv1308  | 104  | 244 | -1,230297619 | -1,720437059 | -10,7214918  | 8,07E-27  | 7,69E-26   | 1,88E-26   | TRUE |
| Rv1309  | 64   | 88  | -0,459431619 | -0,949571059 | -4,061255441 | 4,88E-05  | 0,00013028 | 3,18E-05   | TRUE |
| Rv1310  | 162  | 315 | -0,959358016 | -1,449497456 | -10,75768563 | 5,45E-27  | 5,24E-26   | 1,28E-26   | TRUE |
| Rv1311  | 64   | 164 | -1,357552005 | -1,847691445 | -9,23350766  | 2,62E-20  | 1,94E-19   | 4,74E-20   | TRUE |
| Rv1316c | 1    | 14  | -3,807354922 | -4,297494362 | -4,103720019 | 4,07E-05  | 0,0001093  | 2,67E-05   | TRUE |
| Rv1317c | 16   | 355 | -4,471675214 | -4,961814654 | -21,26644812 | 2,32E-100 | 8,24E-99   | 2,01E-99   | TRUE |
| Rv1319c | 15   | 44  | -1,552541023 | -2,042680463 | -5,11126193  | 3,20E-07  | 1,10E-06   | 2,68E-07   | TRUE |
| Rv1320c | 10   | 43  | -2,10433666  | -2,5944761   | -5,832516169 | 5,46E-09  | 2,18E-08   | 5,32E-09   | TRUE |
| Rv1321  | 37   | 127 | -1,779231321 | -2,269370761 | -9,276211454 | 1,76E-20  | 1,31E-19   | 3,21E-20   | TRUE |
| Rv1322A | 112  | 200 | -0,836501268 | -1,326640708 | -8,013476948 | 1,12E-15  | 6,60E-15   | 1,61E-15   | TRUE |
| Rv1324  | 94   | 308 | -1,712197689 | -2,202337129 | -14,18468449 | 1,14E-45  | 1,81E-44   | 4,42E-45   | TRUE |
| Rv1326c | 105  | 333 | -1,665132849 | -2,155272289 | -14,55242776 | 5,64E-48  | 9,41E-47   | 2,30E-47   | TRUE |
| Rv1328  | 45   | 167 | -1,891851196 | -2,381990636 | -10,94952997 | 6,68E-28  | 6,60E-27   | 1,61E-27   | TRUE |
| Rv1330c | 11   | 38  | -1,788495895 | -2,278635335 | -5,086369555 | 3,65E-07  | 1,24E-06   | 3,03E-07   | TRUE |
| Rv1332  | 232  | 60  | 1,9510904    | 1,460950959  | 7,834923673  | 4,69E-15  | 2,72E-14   | 6,65E-15   | TRUE |
| Rv1333  | 39   | 90  | -1,206450877 | -1,696590318 | -6,447075972 | 1,14E-10  | 5,09E-10   | 1,24E-10   | TRUE |
| Rv1334  | 446  | 100 | 2,15704371   | 1,66690427   | 11,96139363  | 5,66E-33  | 6,14E-32   | 1,50E-32   | TRUE |
| Rv1336  | 162  | 27  | 2,584962501  | 2,094823061  | 8,410651146  | 4,08E-17  | 2,59E-16   | 6,33E-17   | TRUE |
| Rv1337  | 210  | 83  | 1,339206086  | 0,849066646  | 4,816845244  | 1,46E-06  | 4,70E-06   | 1,15E-06   | TRUE |
| Rv1339  | 45   | 103 | -1,194647431 | -1,684786871 | -6,863110418 | 6,74E-12  | 3,25E-11   | 7,94E-12   | TRUE |
| Rv1340  | 29   | 199 | -2,778643625 | -3,268783065 | -14,06586736 | 6,16E-45  | 9,58E-44   | 2,34E-44   | TRUE |
| Rv1343c | 10   | 28  | -1,485426827 | -1,975566267 | -3,989497602 | 6,62E-05  | 0,00017353 | 4,24E-05   | TRUE |
| Rv1344  | 16   | 57  | -1,832890014 | -2,323029454 | -6,302276739 | 2,93E-10  | 1,28E-09   | 3,13E-10   | TRUE |
| Rv1346  | 80   | 22  | 1,862496476  | 1,372357036  | 4,388290662  | 1,14E-05  | 3,28E-05   | 8,02E-06   | TRUE |

|         |      |     |              |              |              |           |            |            |      |
|---------|------|-----|--------------|--------------|--------------|-----------|------------|------------|------|
| Rv1349  | 13   | 93  | -2,838719093 | -3,328858533 | -9,690547526 | 3,31E-22  | 2,64E-21   | 6,45E-22   | TRUE |
| Rv1350  | 16   | 60  | -1,906890596 | -2,397030036 | -6,586970712 | 4,49E-11  | 2,06E-10   | 5,02E-11   | TRUE |
| Rv1351  | 11   | 27  | -1,295455884 | -1,785595324 | -3,659396841 | 0,000253  | 0,00061934 | 0,00015134 | TRUE |
| Rv1353c | 4    | 126 | -4,977279923 | -5,467419364 | -12,78880801 | 1,89E-37  | 2,44E-36   | 5,96E-37   | TRUE |
| Rv1355c | 67   | 241 | -1,846800146 | -2,336939586 | -13,00662017 | 1,12E-38  | 1,48E-37   | 3,62E-38   | TRUE |
| Rv1357c | 0    | 9   | -4,169925001 | -4,660064441 | -3,350615657 | 0,000806  | 0,00180544 | 0,00044117 | TRUE |
| Rv1358  | 28   | 77  | -1,459431619 | -1,949571059 | -6,558487188 | 5,44E-11  | 2,47E-10   | 6,04E-11   | TRUE |
| Rv1360  | 12   | 34  | -1,502500341 | -1,992639781 | -4,421124277 | 9,82E-06  | 2,84E-05   | 6,94E-06   | TRUE |
| Rv1364c | 138  | 32  | 2,108524457  | 1,618385017  | 6,513311631  | 7,35E-11  | 3,33E-10   | 8,14E-11   | TRUE |
| Rv1373  | 76   | 165 | -1,118394701 | -1,608534141 | -8,404093873 | 4,31E-17  | 2,73E-16   | 6,68E-17   | TRUE |
| Rv1375  | 123  | 24  | 2,357552005  | 1,867412565  | 6,795569454  | 1,08E-11  | 5,13E-11   | 1,25E-11   | TRUE |
| Rv1377c | 17   | 56  | -1,719892081 | -2,210031521 | -6,060411122 | 1,36E-09  | 5,63E-09   | 1,38E-09   | TRUE |
| Rv1378c | 27   | 50  | -0,888968688 | -1,379108128 | -4,126949725 | 3,68E-05  | 9,93E-05   | 2,43E-05   | TRUE |
| Rv1379  | 24   | 111 | -2,209453366 | -2,699592806 | -9,574958621 | 1,02E-21  | 7,96E-21   | 1,94E-21   | TRUE |
| Rv1384  | 11   | 91  | -3,048363022 | -3,538502462 | -9,825910576 | 8,71E-23  | 7,22E-22   | 1,76E-22   | TRUE |
| Rv1386  | 287  | 76  | 1,916979413  | 1,426839973  | 8,561577409  | 1,11E-17  | 7,25E-17   | 1,77E-17   | TRUE |
| Rv1387  | 761  | 350 | 1,120541532  | 0,630402092  | 7,074171914  | 1,50E-12  | 7,46E-12   | 1,82E-12   | TRUE |
| Rv1389  | 65   | 21  | 1,63005039   | 1,13991095   | 3,420594646  | 0,000625  | 0,00142942 | 0,00034929 | TRUE |
| Rv1390  | 303  | 74  | 2,033720618  | 1,543581178  | 9,326179437  | 1,10E-20  | 8,29E-20   | 2,03E-20   | TRUE |
| Rv1392  | 676  | 587 | 0,203662743  | -0,286476697 | -3,552131848 | 0,000382  | 0,00090987 | 0,00022233 | TRUE |
| Rv1395  | 313  | 535 | -0,773376234 | -1,263515674 | -12,62393568 | 1,56E-36  | 1,91E-35   | 4,68E-36   | TRUE |
| Rv1397c | 481  | 49  | 3,29518324   | 2,8050438    | 17,16060493  | 5,24E-66  | 1,18E-64   | 2,87E-65   | TRUE |
| Rv1398c | 2903 | 449 | 2,692757222  | 2,202617782  | 36,79006376  | 2,66E-296 | 5,77E-294  | 1,41E-294  | TRUE |
| Rv1401  | 11   | 92  | -3,064130337 | -3,554269777 | -9,896699693 | 4,30E-23  | 3,62E-22   | 8,85E-23   | TRUE |
| Rv1403c | 118  | 5   | 4,560714954  | 4,070575514  | 9,903981367  | 4,00E-23  | 3,38E-22   | 8,26E-23   | TRUE |
| Rv1405c | 740  | 76  | 3,283453947  | 2,793314507  | 21,24134292  | 3,96E-100 | 1,39E-98   | 3,41E-99   | TRUE |
| Rv1407  | 56   | 106 | -0,920565533 | -1,410704973 | -6,113330513 | 9,76E-10  | 4,10E-09   | 1,00E-09   | TRUE |
| Rv1409  | 36   | 144 | -2           | -2,49013944  | -10,43171032 | 1,78E-25  | 1,59E-24   | 3,90E-25   | TRUE |
| Rv1415  | 196  | 54  | 1,859822342  | 1,369682902  | 6,859050868  | 6,93E-12  | 3,33E-11   | 8,14E-12   | TRUE |
| Rv1420  | 100  | 133 | -0,411426246 | -0,901565686 | -4,780223871 | 1,75E-06  | 5,60E-06   | 1,37E-06   | TRUE |
| Rv1421  | 42   | 69  | -0,716207034 | -1,206346474 | -4,369712737 | 1,24E-05  | 3,55E-05   | 8,68E-06   | TRUE |
| Rv1427c | 4    | 22  | -2,459431619 | -2,949571059 | -4,459773863 | 8,20E-06  | 2,39E-05   | 5,85E-06   | TRUE |
| Rv1429  | 92   | 128 | -0,476438044 | -0,966577484 | -4,971306772 | 6,65E-07  | 2,21E-06   | 5,41E-07   | TRUE |
| Rv1433  | 15   | 75  | -2,321928095 | -2,812067535 | -8,040066563 | 8,98E-16  | 5,35E-15   | 1,31E-15   | TRUE |
| Rv1439c | 25   | 4   | 2,64385619   | 2,15371675   | 3,362189686  | 0,000773  | 0,00174293 | 0,00042553 | TRUE |
| Rv1443c | 12   | 92  | -2,938599455 | -3,428738895 | -9,757134402 | 1,72E-22  | 1,40E-21   | 3,42E-22   | TRUE |
| Rv1445c | 8    | 42  | -2,392317423 | -2,882456863 | -6,092360002 | 1,11E-09  | 4,65E-09   | 1,14E-09   | TRUE |

|         |      |      |              |              |              |          |            |            |      |
|---------|------|------|--------------|--------------|--------------|----------|------------|------------|------|
| Rv1448c | 66   | 178  | -1,431339312 | -1,921478752 | -9,876679119 | 5,25E-23 | 4,41E-22   | 1,08E-22   | TRUE |
| Rv1451  | 73   | 18   | 2,019899557  | 1,529760117  | 4,546941214  | 5,44E-06 | 1,62E-05   | 3,96E-06   | TRUE |
| Rv1455  | 40   | 5    | 3            | 2,50986056   | 4,659537972  | 3,17E-06 | 9,78E-06   | 2,39E-06   | TRUE |
| Rv1460  | 182  | 387  | -1,088395116 | -1,578534556 | -12,69886955 | 6,00E-37 | 7,58E-36   | 1,85E-36   | TRUE |
| Rv1465  | 32   | 60   | -0,906890596 | -1,397030036 | -4,565434518 | 4,98E-06 | 1,49E-05   | 3,65E-06   | TRUE |
| Rv1466  | 64   | 173  | -1,434628228 | -1,924767668 | -9,748046118 | 1,88E-22 | 1,53E-21   | 3,73E-22   | TRUE |
| Rv1468c | 25   | 62   | -1,310340121 | -1,800479561 | -5,577247193 | 2,44E-08 | 9,15E-08   | 2,24E-08   | TRUE |
| Rv1469  | 9    | 66   | -2,874469118 | -3,364608558 | -8,200157515 | 2,40E-16 | 1,48E-15   | 3,61E-16   | TRUE |
| Rv1473  | 426  | 214  | 0,993242634  | 0,503103194  | 4,317150158  | 1,58E-05 | 4,45E-05   | 1,09E-05   | TRUE |
| Rv1474c | 20   | 2    | 3,321928095  | 2,831788655  | 3,515665651  | 0,000439 | 0,00103034 | 0,00025169 | TRUE |
| Rv1475c | 210  | 55   | 1,932885804  | 1,442746364  | 7,384470927  | 1,53E-13 | 8,06E-13   | 1,97E-13   | TRUE |
| Rv1476  | 28   | 68   | -1,280107919 | -1,770247359 | -5,773001421 | 7,79E-09 | 3,06E-08   | 7,48E-09   | TRUE |
| Rv1484  | 25   | 68   | -1,443606651 | -1,933746092 | -6,130013241 | 8,79E-10 | 3,71E-09   | 9,06E-10   | TRUE |
| Rv1485  | 41   | 226  | -2,462626958 | -2,952766398 | -14,3031035  | 2,09E-46 | 3,40E-45   | 8,32E-46   | TRUE |
| Rv1487  | 150  | 198  | -0,40053793  | -0,89067737  | -5,773336806 | 7,77E-09 | 3,06E-08   | 7,48E-09   | TRUE |
| Rv1488  | 135  | 145  | -0,103093493 | -0,593232933 | -3,464585875 | 0,000531 | 0,00122707 | 0,00029984 | TRUE |
| Rv1490  | 30   | 80   | -1,415037499 | -1,905176939 | -6,583272947 | 4,60E-11 | 2,10E-10   | 5,14E-11   | TRUE |
| Rv1492  | 124  | 36   | 1,784271309  | 1,294131869  | 5,222428548  | 1,77E-07 | 6,21E-07   | 1,52E-07   | TRUE |
| Rv1495  | 4    | 63   | -3,977279923 | -4,467419364 | -8,787058407 | 1,54E-18 | 1,05E-17   | 2,57E-18   | TRUE |
| Rv1496  | 37   | 67   | -0,856635825 | -1,346775265 | -4,691572271 | 2,71E-06 | 8,47E-06   | 2,07E-06   | TRUE |
| Rv1502  | 36   | 115  | -1,67556505  | -2,16570449  | -8,57651667  | 9,78E-18 | 6,39E-17   | 1,56E-17   | TRUE |
| Rv1506c | 54   | 0    | 6,754887502  | 6,264748062  | 7,049782203  | 1,79E-12 | 8,87E-12   | 2,17E-12   | TRUE |
| Rv1507c | 26   | 96   | -1,884522783 | -2,374662223 | -8,286425384 | 1,17E-16 | 7,23E-16   | 1,77E-16   | TRUE |
| Rv1510  | 40   | 67   | -0,744161096 | -1,234300536 | -4,384396116 | 1,16E-05 | 3,33E-05   | 8,15E-06   | TRUE |
| Rv1515c | 5    | 65   | -3,700439718 | -4,190579158 | -8,783804378 | 1,58E-18 | 1,08E-17   | 2,65E-18   | TRUE |
| Rv1517  | 18   | 0    | 5,169925001  | 4,679785561  | 4,001442646  | 6,30E-05 | 0,00016528 | 4,04E-05   | TRUE |
| Rv1522c | 133  | 25   | 2,411426246  | 1,921286806  | 7,202749669  | 5,90E-13 | 3,00E-12   | 7,33E-13   | TRUE |
| Rv1524  | 5    | 64   | -3,678071905 | -4,168211345 | -8,70311897  | 3,23E-18 | 2,17E-17   | 5,31E-18   | TRUE |
| Rv1526c | 62   | 17   | 1,866733469  | 1,376594029  | 3,872230903  | 0,000108 | 0,00027543 | 6,73E-05   | TRUE |
| Rv1527c | 779  | 126  | 2,628199595  | 2,138060155  | 18,68904119  | 6,08E-78 | 1,59E-76   | 3,89E-77   | TRUE |
| Rv1528c | 921  | 4451 | -2,272856439 | -2,762995879 | -61,52260241 | 0        | 0          | 0          | TRUE |
| Rv1529  | 145  | 155  | -0,096215315 | -0,586354755 | -3,544795403 | 0,000393 | 0,00093273 | 0,00022792 | TRUE |
| Rv1531  | 21   | 72   | -1,777607579 | -2,267747019 | -6,981216002 | 2,93E-12 | 1,43E-11   | 3,49E-12   | TRUE |
| Rv1532c | 42   | 3    | 3,807354922  | 3,317215482  | 5,486565619  | 4,10E-08 | 1,51E-07   | 3,69E-08   | TRUE |
| Rv1533  | 2701 | 182  | 3,891483284  | 3,401343844  | 44,4979378   | 0        | 0          | 0          | TRUE |
| Rv1534  | 61   | 8    | 2,930737338  | 2,440597898  | 5,66292813   | 1,49E-08 | 5,69E-08   | 1,39E-08   | TRUE |
| Rv1535  | 161  | 257  | -0,674707671 | -1,164847111 | -8,20336574  | 2,34E-16 | 1,44E-15   | 3,52E-16   | TRUE |

|         |     |     |              |              |              |           |            |            |      |
|---------|-----|-----|--------------|--------------|--------------|-----------|------------|------------|------|
| Rv1538c | 12  | 26  | -1,115477217 | -1,605616657 | -3,331333345 | 0,000864  | 0,0019226  | 0,00046965 | TRUE |
| Rv1541c | 2   | 104 | -5,700439718 | -6,190579158 | -11,60601217 | 3,84E-31  | 4,10E-30   | 1,00E-30   | TRUE |
| Rv1542c | 2   | 119 | -5,894817763 | -6,384957203 | -12,38051341 | 3,33E-35  | 3,88E-34   | 9,49E-35   | TRUE |
| Rv1543  | 38  | 78  | -1,037474705 | -1,527614145 | -5,564674536 | 2,63E-08  | 9,81E-08   | 2,40E-08   | TRUE |
| Rv1544  | 29  | 45  | -0,633872101 | -1,124011541 | -3,335189372 | 0,000852  | 0,00190319 | 0,00046506 | TRUE |
| Rv1547  | 62  | 153 | -1,303191532 | -1,793330972 | -8,737957593 | 2,37E-18  | 1,61E-17   | 3,93E-18   | TRUE |
| Rv1551  | 2   | 14  | -2,807354922 | -3,297494362 | -3,74459426  | 0,000181  | 0,00044999 | 0,00010996 | TRUE |
| Rv1552  | 48  | 4   | 3,584962501  | 3,094823061  | 5,687177019  | 1,29E-08  | 4,97E-08   | 1,21E-08   | TRUE |
| Rv1553  | 18  | 1   | 4,169925001  | 3,679785561  | 3,741720075  | 0,000183  | 0,00045386 | 0,00011073 | TRUE |
| Rv1557  | 46  | 89  | -0,952171475 | -1,442310915 | -5,695833936 | 1,23E-08  | 4,73E-08   | 1,16E-08   | TRUE |
| Rv1558  | 8   | 153 | -4,257387843 | -4,747527283 | -13,86306744 | 1,06E-43  | 1,62E-42   | 3,95E-43   | TRUE |
| Rv1559  | 44  | 82  | -0,898120386 | -1,388259826 | -5,311862647 | 1,09E-07  | 3,88E-07   | 9,47E-08   | TRUE |
| Rv1561  | 16  | 1   | 4            | 3,50986056   | 3,465376216  | 0,000529  | 0,00122564 | 0,00029914 | TRUE |
| Rv1562c | 14  | 117 | -3,063009798 | -3,553149238 | -11,1594108  | 6,44E-29  | 6,57E-28   | 1,60E-28   | TRUE |
| Rv1563c | 8   | 92  | -3,523561956 | -4,013701396 | -10,32064817 | 5,68E-25  | 5,05E-24   | 1,23E-24   | TRUE |
| Rv1564c | 38  | 466 | -3,616258631 | -4,106398071 | -23,38840106 | 5,61E-121 | 2,55E-119  | 6,22E-120  | TRUE |
| Rv1573  | 3   | 23  | -2,938599455 | -3,428738895 | -4,87842283  | 1,07E-06  | 3,49E-06   | 8,54E-07   | TRUE |
| Rv1576c | 203 | 407 | -1,003549067 | -1,493688507 | -12,50574036 | 6,94E-36  | 8,22E-35   | 2,01E-35   | TRUE |
| Rv1577c | 204 | 222 | -0,121990524 | -0,612129964 | -4,409381451 | 1,04E-05  | 2,99E-05   | 7,31E-06   | TRUE |
| Rv1578c | 42  | 1   | 5,392317423  | 4,902177983  | 6,160744652  | 7,24E-10  | 3,09E-09   | 7,54E-10   | TRUE |
| Rv1580c | 16  | 1   | 4            | 3,50986056   | 3,465376216  | 0,000529  | 0,00122564 | 0,00029914 | TRUE |
| Rv1582c | 64  | 19  | 1,752072487  | 1,261933047  | 3,678884561  | 0,000234  | 0,0005746  | 0,00014041 | TRUE |
| Rv1585c | 48  | 5   | 3,263034406  | 2,772894966  | 5,387939222  | 7,13E-08  | 2,58E-07   | 6,31E-08   | TRUE |
| Rv1586c | 720 | 11  | 6,032421478  | 5,542282038  | 25,81334509  | 6,28E-147 | 3,66E-145  | 8,94E-146  | TRUE |
| Rv1589  | 197 | 42  | 2,229734397  | 1,739594957  | 8,191291915  | 2,58E-16  | 1,58E-15   | 3,87E-16   | TRUE |
| Rv1590  | 49  | 1   | 5,614709844  | 5,124570404  | 6,693273368  | 2,18E-11  | 1,02E-10   | 2,50E-11   | TRUE |
| Rv1591  | 110 | 20  | 2,459431619  | 1,969292179  | 6,658378597  | 2,77E-11  | 1,29E-10   | 3,15E-11   | TRUE |
| Rv1592c | 177 | 47  | 1,913016698  | 1,422877258  | 6,709045402  | 1,96E-11  | 9,21E-11   | 2,25E-11   | TRUE |
| Rv1593c | 356 | 18  | 4,30580843   | 3,815668989  | 16,85470183  | 9,69E-64  | 2,10E-62   | 5,14E-63   | TRUE |
| Rv1594  | 827 | 23  | 5,168181563  | 4,678042123  | 27,12514515  | 4,98E-162 | 3,47E-160  | 8,48E-161  | TRUE |
| Rv1595  | 294 | 103 | 1,513171818  | 1,023032378  | 6,663520659  | 2,67E-11  | 1,25E-10   | 3,05E-11   | TRUE |
| Rv1596  | 327 | 15  | 4,44625623   | 3,95611679   | 16,34532075  | 4,70E-60  | 9,41E-59   | 2,30E-59   | TRUE |
| Rv1597  | 81  | 5   | 4,017921908  | 3,527782468  | 7,812758517  | 5,59E-15  | 3,22E-14   | 7,87E-15   | TRUE |
| Rv1598c | 97  | 18  | 2,429987841  | 1,939848401  | 6,190544789  | 6,00E-10  | 2,58E-09   | 6,30E-10   | TRUE |
| Rv1600  | 46  | 88  | -0,935869663 | -1,426009103 | -5,615568211 | 1,96E-08  | 7,41E-08   | 1,81E-08   | TRUE |
| Rv1601  | 17  | 62  | -1,866733469 | -2,356872909 | -6,629664171 | 3,36E-11  | 1,55E-10   | 3,79E-11   | TRUE |
| Rv1602  | 31  | 65  | -1,068171503 | -1,558310943 | -5,15435709  | 2,55E-07  | 8,80E-07   | 2,15E-07   | TRUE |



|         |     |     |              |              |              |           |            |            |      |
|---------|-----|-----|--------------|--------------|--------------|-----------|------------|------------|------|
| Rv1604  | 20  | 113 | -2,498250868 | -2,988390308 | -10,17225915 | 2,64E-24  | 2,30E-23   | 5,63E-24   | TRUE |
| Rv1606  | 8   | 39  | -2,285402219 | -2,775541659 | -5,758693668 | 8,48E-09  | 3,32E-08   | 8,10E-09   | TRUE |
| Rv1607  | 22  | 39  | -0,8259706   | -1,31611004  | -3,51647553  | 0,000437  | 0,00102813 | 0,00025123 | TRUE |
| Rv1618  | 27  | 100 | -1,888968688 | -2,379108128 | -8,466626266 | 2,53E-17  | 1,62E-16   | 3,96E-17   | TRUE |
| Rv1620c | 13  | 86  | -2,725825037 | -3,215964477 | -9,180522662 | 4,29E-20  | 3,13E-19   | 7,65E-20   | TRUE |
| Rv1622c | 49  | 3   | 4,029747343  | 3,539607903  | 6,084420367  | 1,17E-09  | 4,88E-09   | 1,19E-09   | TRUE |
| Rv1623c | 56  | 7   | 3            | 2,50986056   | 5,513276715  | 3,52E-08  | 1,30E-07   | 3,19E-08   | TRUE |
| Rv1626  | 90  | 34  | 1,404390255  | 0,914250815  | 3,357010592  | 0,000788  | 0,00176825 | 0,00043208 | TRUE |
| Rv1627c | 198 | 202 | -0,028854863 | -0,518994303 | -3,624084889 | 0,00029   | 0,00070335 | 0,00017178 | TRUE |
| Rv1628c | 281 | 131 | 1,101003319  | 0,610863879  | 4,17797933   | 2,94E-05  | 8,03E-05   | 1,96E-05   | TRUE |
| Rv1629  | 17  | 46  | -1,436099115 | -1,926238555 | -5,028687529 | 4,94E-07  | 1,66E-06   | 4,05E-07   | TRUE |
| Rv1630  | 246 | 272 | -0,144948336 | -0,635087776 | -5,043960402 | 4,56E-07  | 1,54E-06   | 3,75E-07   | TRUE |
| Rv1631  | 93  | 142 | -0,610588308 | -1,100727748 | -5,825865845 | 5,68E-09  | 2,26E-08   | 5,53E-09   | TRUE |
| Rv1636  | 75  | 8   | 3,22881869   | 2,73867925   | 6,691447664  | 2,21E-11  | 1,03E-10   | 2,53E-11   | TRUE |
| Rv1639c | 61  | 77  | -0,336049203 | -0,826188643 | -3,376744312 | 0,000733  | 0,00166046 | 0,00040574 | TRUE |
| Rv1640c | 90  | 23  | 1,96829114   | 1,4781517    | 4,92224841   | 8,56E-07  | 2,81E-06   | 6,87E-07   | TRUE |
| Rv1645c | 140 | 149 | -0,089885504 | -0,580024944 | -3,441741219 | 0,000578  | 0,00133001 | 0,000325   | TRUE |
| Rv1649  | 13  | 141 | -3,439111634 | -3,929251074 | -12,69261031 | 6,50E-37  | 8,19E-36   | 2,00E-36   | TRUE |
| Rv1651c | 75  | 14  | 2,421463768  | 1,931324328  | 5,427473561  | 5,72E-08  | 2,09E-07   | 5,11E-08   | TRUE |
| Rv1652  | 48  | 157 | -1,709658248 | -2,199797688 | -10,11908413 | 4,55E-24  | 3,95E-23   | 9,66E-24   | TRUE |
| Rv1654  | 35  | 76  | -1,118644496 | -1,608783937 | -5,703917022 | 1,17E-08  | 4,52E-08   | 1,11E-08   | TRUE |
| Rv1659  | 21  | 0   | 5,392317423  | 4,902177983  | 4,356287558  | 1,32E-05  | 3,76E-05   | 9,19E-06   | TRUE |
| Rv1662  | 222 | 860 | -1,953776983 | -2,443916423 | -25,23208456 | 1,78E-140 | 9,66E-139  | 2,36E-139  | TRUE |
| Rv1663  | 259 | 993 | -1,93884162  | -2,42898106  | -27,01945263 | 8,73E-161 | 5,98E-159  | 1,46E-159  | TRUE |
| Rv1664  | 224 | 324 | -0,532495081 | -1,022634521 | -8,288694886 | 1,14E-16  | 7,11E-16   | 1,74E-16   | TRUE |
| Rv1665  | 191 | 268 | -0,488660362 | -0,978799802 | -7,269944464 | 3,60E-13  | 1,86E-12   | 4,54E-13   | TRUE |
| Rv1669  | 24  | 52  | -1,115477217 | -1,605616657 | -4,711315623 | 2,46E-06  | 7,71E-06   | 1,88E-06   | TRUE |
| Rv1670  | 15  | 36  | -1,263034406 | -1,753173846 | -4,172188065 | 3,02E-05  | 8,23E-05   | 2,01E-05   | TRUE |
| Rv1672c | 41  | 143 | -1,802319332 | -2,292458772 | -9,903745429 | 4,01E-23  | 3,38E-22   | 8,26E-23   | TRUE |
| Rv1674c | 34  | 6   | 2,502500341  | 2,0123609    | 3,754475262  | 0,000174  | 0,00043371 | 0,00010591 | TRUE |
| Rv1677  | 2   | 12  | -2,584962501 | -3,075101941 | -3,3600313   | 0,000779  | 0,00175205 | 0,00042788 | TRUE |
| Rv1678  | 7   | 43  | -2,618909833 | -3,109049273 | -6,393028567 | 1,63E-10  | 7,22E-10   | 1,76E-10   | TRUE |
| Rv1679  | 6   | 39  | -2,700439718 | -3,190579158 | -6,160413248 | 7,26E-10  | 3,09E-09   | 7,55E-10   | TRUE |
| Rv1683  | 59  | 106 | -0,845277405 | -1,335416845 | -5,863076706 | 4,54E-09  | 1,83E-08   | 4,46E-09   | TRUE |
| Rv1684  | 4   | 50  | -3,64385619  | -4,13399563  | -7,674732979 | 1,66E-14  | 9,23E-14   | 2,26E-14   | TRUE |
| Rv1690  | 10  | 59  | -2,560714954 | -3,050854395 | -7,422931959 | 1,15E-13  | 6,09E-13   | 1,49E-13   | TRUE |
| Rv1691  | 12  | 44  | -1,874469118 | -2,364608558 | -5,595746826 | 2,20E-08  | 8,26E-08   | 2,02E-08   | TRUE |

|         |     |      |              |              |              |           |            |            |      |
|---------|-----|------|--------------|--------------|--------------|-----------|------------|------------|------|
| Rv1692  | 9   | 30   | -1,736965594 | -2,227105034 | -4,456753187 | 8,32E-06  | 2,42E-05   | 5,93E-06   | TRUE |
| Rv1696  | 59  | 91   | -0,625151591 | -1,115291031 | -4,713329712 | 2,44E-06  | 7,64E-06   | 1,87E-06   | TRUE |
| Rv1697  | 17  | 40   | -1,234465254 | -1,724604694 | -4,347691391 | 1,38E-05  | 3,90E-05   | 9,54E-06   | TRUE |
| Rv1699  | 79  | 109  | -0,464403577 | -0,954543017 | -4,539784443 | 5,63E-06  | 1,67E-05   | 4,08E-06   | TRUE |
| Rv1701  | 12  | 101  | -3,073248982 | -3,563388422 | -10,37971056 | 3,07E-25  | 2,74E-24   | 6,70E-25   | TRUE |
| Rv1705c | 41  | 6    | 2,772589504  | 2,282450064  | 4,46243208   | 8,10E-06  | 2,37E-05   | 5,78E-06   | TRUE |
| Rv1706c | 10  | 26   | -1,378511623 | -1,868651063 | -3,704318614 | 0,000212  | 0,00052155 | 0,00012744 | TRUE |
| Rv1714  | 153 | 16   | 3,257387843  | 2,767248403  | 9,609592804  | 7,28E-22  | 5,72E-21   | 1,40E-21   | TRUE |
| Rv1718  | 74  | 3    | 4,624490865  | 4,134351425  | 7,878286785  | 3,32E-15  | 1,94E-14   | 4,73E-15   | TRUE |
| Rv1719  | 63  | 5    | 3,655351829  | 3,165212389  | 6,582913028  | 4,61E-11  | 2,10E-10   | 5,14E-11   | TRUE |
| Rv1722  | 48  | 12   | 2            | 1,50986056   | 3,651600921  | 0,000261  | 0,00063725 | 0,00015572 | TRUE |
| Rv1724c | 30  | 1    | 4,906890596  | 4,416751156  | 5,1028704    | 3,35E-07  | 1,14E-06   | 2,80E-07   | TRUE |
| Rv1726  | 3   | 19   | -2,662965013 | -3,153104453 | -4,277001811 | 1,89E-05  | 5,30E-05   | 1,29E-05   | TRUE |
| Rv1733c | 42  | 116  | -1,465663572 | -1,955803012 | -8,067080659 | 7,20E-16  | 4,32E-15   | 1,06E-15   | TRUE |
| Rv1736c | 59  | 343  | -2,539421717 | -3,029561157 | -17,84095518 | 3,40E-71  | 8,04E-70   | 1,97E-70   | TRUE |
| Rv1737c | 21  | 76   | -1,855610091 | -2,345749531 | -7,319626697 | 2,49E-13  | 1,29E-12   | 3,16E-13   | TRUE |
| Rv1738  | 275 | 2478 | -3,171672664 | -3,661812104 | -51,98872489 | 0         | 0          | 0          | TRUE |
| Rv1741  | 105 | 7    | 3,906890596  | 3,416751156  | 8,782691651  | 1,60E-18  | 1,09E-17   | 2,67E-18   | TRUE |
| Rv1749c | 117 | 353  | -1,593159654 | -2,083299094 | -14,66476366 | 1,08E-48  | 1,82E-47   | 4,46E-48   | TRUE |
| Rv1750c | 87  | 629  | -2,853972711 | -3,344112151 | -25,25645845 | 9,62E-141 | 5,29E-139  | 1,29E-139  | TRUE |
| Rv1753c | 31  | 5    | 2,632268215  | 2,142128775  | 3,731327674  | 0,00019   | 0,0004718  | 0,00011525 | TRUE |
| Rv1754c | 1   | 38   | -5,247927513 | -5,738066953 | -7,03304115  | 2,02E-12  | 9,96E-12   | 2,43E-12   | TRUE |
| Rv1755c | 18  | 0    | 5,169925001  | 4,679785561  | 4,001442646  | 6,30E-05  | 0,00016528 | 4,04E-05   | TRUE |
| Rv1760  | 209 | 310  | -0,568765273 | -1,058904713 | -8,342450814 | 7,28E-17  | 4,56E-16   | 1,11E-16   | TRUE |
| Rv1763  | 23  | 40   | -0,798366139 | -1,288505579 | -3,503300345 | 0,00046   | 0,00107453 | 0,00026257 | TRUE |
| Rv1764  | 19  | 45   | -1,243925583 | -1,734065023 | -4,629141499 | 3,67E-06  | 1,12E-05   | 2,74E-06   | TRUE |
| Rv1767  | 156 | 17   | 3,197939378  | 2,707799938  | 9,593232772  | 8,54E-22  | 6,69E-21   | 1,64E-21   | TRUE |
| Rv1770  | 126 | 259  | -1,039528364 | -1,529667804 | -10,15164344 | 3,26E-24  | 2,84E-23   | 6,94E-24   | TRUE |
| Rv1773c | 64  | 98   | -0,614709844 | -1,104849284 | -4,854269304 | 1,21E-06  | 3,94E-06   | 9,62E-07   | TRUE |
| Rv1774  | 118 | 34   | 1,795180208  | 1,305040768  | 5,127733511  | 2,93E-07  | 1,01E-06   | 2,47E-07   | TRUE |
| Rv1775  | 183 | 32   | 2,515699838  | 2,025560398  | 8,748093212  | 2,17E-18  | 1,47E-17   | 3,60E-18   | TRUE |
| Rv1776c | 28  | 4    | 2,807354922  | 2,317215482  | 3,721387151  | 0,000198  | 0,00048922 | 0,00011951 | TRUE |
| Rv1777  | 19  | 99   | -2,381429107 | -2,871568547 | -9,336137159 | 9,99E-21  | 7,56E-20   | 1,85E-20   | TRUE |
| Rv1779c | 88  | 183  | -1,05626822  | -1,54640766  | -8,601047707 | 7,90E-18  | 5,23E-17   | 1,28E-17   | TRUE |
| Rv1780  | 10  | 123  | -3,62058641  | -4,11072585  | -12,01825317 | 2,85E-33  | 3,14E-32   | 7,68E-33   | TRUE |
| Rv1782  | 647 | 232  | 1,479640907  | 0,989501467  | 9,619286835  | 6,63E-22  | 5,22E-21   | 1,28E-21   | TRUE |
| Rv1785c | 39  | 6    | 2,700439718  | 2,210300278  | 4,267677572  | 1,98E-05  | 5,51E-05   | 1,35E-05   | TRUE |

|         |      |     |              |              |              |           |            |            |      |
|---------|------|-----|--------------|--------------|--------------|-----------|------------|------------|------|
| Rv1789  | 73   | 126 | -0,787455365 | -1,277594805 | -6,177239264 | 6,52E-10  | 2,80E-09   | 6,84E-10   | TRUE |
| Rv1790  | 18   | 56  | -1,637429921 | -2,127569361 | -5,918255403 | 3,25E-09  | 1,32E-08   | 3,23E-09   | TRUE |
| Rv1793  | 384  | 543 | -0,499845887 | -0,989985327 | -10,4490212  | 1,48E-25  | 1,34E-24   | 3,26E-25   | TRUE |
| Rv1794  | 199  | 241 | -0,276264716 | -0,766404156 | -5,600371264 | 2,14E-08  | 8,05E-08   | 1,97E-08   | TRUE |
| Rv1795  | 367  | 690 | -0,910816299 | -1,400955739 | -15,52356077 | 2,40E-54  | 4,41E-53   | 1,08E-53   | TRUE |
| Rv1796  | 280  | 532 | -0,925999419 | -1,416138859 | -13,74044691 | 5,81E-43  | 8,63E-42   | 2,11E-42   | TRUE |
| Rv1797  | 204  | 406 | -0,992910575 | -1,483050015 | -12,42429591 | 1,93E-35  | 2,27E-34   | 5,54E-35   | TRUE |
| Rv1798  | 206  | 221 | -0,101402032 | -0,591541472 | -4,266665593 | 1,98E-05  | 5,53E-05   | 1,35E-05   | TRUE |
| Rv1799  | 11   | 34  | -1,628031223 | -2,118170663 | -4,598511656 | 4,26E-06  | 1,29E-05   | 3,15E-06   | TRUE |
| Rv1800  | 249  | 82  | 1,602449927  | 1,112310487  | 6,564951239  | 5,20E-11  | 2,37E-10   | 5,79E-11   | TRUE |
| Rv1804c | 19   | 91  | -2,259867127 | -2,750006567 | -8,754521088 | 2,05E-18  | 1,39E-17   | 3,41E-18   | TRUE |
| Rv1806  | 1346 | 240 | 2,487572099  | 1,997432659  | 23,52382851  | 2,33E-122 | 1,07E-120  | 2,61E-121  | TRUE |
| Rv1808  | 1191 | 552 | 1,109433241  | 0,619293801  | 8,713777556  | 2,94E-18  | 1,99E-17   | 4,85E-18   | TRUE |
| Rv1811  | 303  | 114 | 1,410283969  | 0,920144529  | 6,193943746  | 5,87E-10  | 2,53E-09   | 6,17E-10   | TRUE |
| Rv1813c | 112  | 33  | 1,762960803  | 1,272821363  | 4,899595987  | 9,60E-07  | 3,14E-06   | 7,68E-07   | TRUE |
| Rv1814  | 92   | 162 | -0,816288047 | -1,306427487 | -7,126929411 | 1,03E-12  | 5,14E-12   | 1,26E-12   | TRUE |
| Rv1816  | 63   | 82  | -0,380272081 | -0,870411521 | -3,643164408 | 0,000269  | 0,00065605 | 0,00016031 | TRUE |
| Rv1817  | 165  | 24  | 2,781359714  | 2,291220273  | 8,973287125  | 2,88E-19  | 2,04E-18   | 4,98E-19   | TRUE |
| Rv1818c | 16   | 47  | -1,554588852 | -2,044728292 | -5,286067175 | 1,25E-07  | 4,44E-07   | 1,09E-07   | TRUE |
| Rv1826  | 66   | 11  | 2,584962501  | 2,094823061  | 5,368140403  | 7,96E-08  | 2,87E-07   | 7,02E-08   | TRUE |
| Rv1827  | 578  | 237 | 1,286182434  | 0,796042994  | 7,563538088  | 3,92E-14  | 2,12E-13   | 5,19E-14   | TRUE |
| Rv1829  | 58   | 103 | -0,828519532 | -1,318658972 | -5,723571753 | 1,04E-08  | 4,05E-08   | 9,90E-09   | TRUE |
| Rv1832  | 429  | 543 | -0,33997455  | -0,83011399  | -9,008023986 | 2,10E-19  | 1,50E-18   | 3,65E-19   | TRUE |
| Rv1835c | 35   | 56  | -0,678071905 | -1,168211345 | -3,837397066 | 0,000124  | 0,00031592 | 7,72E-05   | TRUE |
| Rv1837c | 98   | 22  | 2,155278225  | 1,665138785  | 5,601638033  | 2,12E-08  | 8,00E-08   | 1,95E-08   | TRUE |
| Rv1838c | 27   | 0   | 5,754887502  | 5,264748062  | 4,981858627  | 6,30E-07  | 2,10E-06   | 5,14E-07   | TRUE |
| Rv1842c | 47   | 195 | -2,052741462 | -2,542880902 | -12,28392011 | 1,11E-34  | 1,28E-33   | 3,13E-34   | TRUE |
| Rv1843c | 138  | 162 | -0,231325546 | -0,721464986 | -4,355814499 | 1,33E-05  | 3,77E-05   | 9,21E-06   | TRUE |
| Rv1845c | 80   | 20  | 2            | 1,50986056   | 4,714286094  | 2,43E-06  | 7,61E-06   | 1,86E-06   | TRUE |
| Rv1847  | 8    | 91  | -3,50779464  | -3,99793408  | -10,25205336 | 1,16E-24  | 1,02E-23   | 2,50E-24   | TRUE |
| Rv1848  | 13   | 287 | -4,464467209 | -4,954606649 | -19,11725202 | 1,81E-81  | 4,99E-80   | 1,22E-80   | TRUE |
| Rv1849  | 8    | 63  | -2,977279923 | -3,467419364 | -8,110619942 | 5,04E-16  | 3,04E-15   | 7,43E-16   | TRUE |
| Rv1850  | 47   | 79  | -0,749191896 | -1,239331337 | -4,776156669 | 1,79E-06  | 5,71E-06   | 1,39E-06   | TRUE |
| Rv1855c | 95   | 28  | 1,762500686  | 1,272361246  | 4,5111359    | 6,45E-06  | 1,90E-05   | 4,64E-06   | TRUE |
| Rv1857  | 19   | 88  | -2,211504105 | -2,701643545 | -8,528775317 | 1,48E-17  | 9,56E-17   | 2,34E-17   | TRUE |
| Rv1870c | 258  | 113 | 1,191048293  | 0,700908853  | 4,522229782  | 6,12E-06  | 1,81E-05   | 4,42E-06   | TRUE |
| Rv1871c | 484  | 643 | -0,40981169  | -0,89995113  | -10,50024348 | 8,62E-26  | 7,88E-25   | 1,93E-25   | TRUE |

|         |      |      |              |              |              |           |            |            |      |
|---------|------|------|--------------|--------------|--------------|-----------|------------|------------|------|
| Rv1872c | 1372 | 1407 | -0,036341847 | -0,526481287 | -9,703785259 | 2,91E-22  | 2,33E-21   | 5,70E-22   | TRUE |
| Rv1874  | 92   | 118  | -0,359081093 | -0,849220533 | -4,279767281 | 1,87E-05  | 5,24E-05   | 1,28E-05   | TRUE |
| Rv1876  | 203  | 16   | 3,665335917  | 3,175196477  | 11,8340247   | 2,60E-32  | 2,81E-31   | 6,86E-32   | TRUE |
| Rv1877  | 402  | 75   | 2,422233001  | 1,932093561  | 12,57094763  | 3,05E-36  | 3,69E-35   | 9,01E-36   | TRUE |
| Rv1878  | 104  | 10   | 3,378511623  | 2,888372183  | 8,097605024  | 5,61E-16  | 3,38E-15   | 8,25E-16   | TRUE |
| Rv1879  | 93   | 17   | 2,45169597   | 1,96155653   | 6,106365161  | 1,02E-09  | 4,28E-09   | 1,04E-09   | TRUE |
| Rv1882c | 51   | 9    | 2,502500341  | 2,0123609    | 4,598313319  | 4,26E-06  | 1,29E-05   | 3,15E-06   | TRUE |
| Rv1883c | 80   | 141  | -0,817623258 | -1,307762698 | -6,654102232 | 2,85E-11  | 1,32E-10   | 3,23E-11   | TRUE |
| Rv1887  | 82   | 192  | -1,227410496 | -1,717549936 | -9,499075312 | 2,12E-21  | 1,64E-20   | 4,01E-21   | TRUE |
| Rv1891  | 74   | 131  | -0,823969636 | -1,314109076 | -6,437784277 | 1,21E-10  | 5,41E-10   | 1,32E-10   | TRUE |
| Rv1893  | 13   | 59   | -2,182203331 | -2,672342771 | -6,942785624 | 3,84E-12  | 1,87E-11   | 4,56E-12   | TRUE |
| Rv1894c | 782  | 56   | 3,803669875  | 3,313530435  | 23,66879108  | 7,56E-124 | 3,56E-122  | 8,69E-123  | TRUE |
| Rv1895  | 587  | 44   | 3,737785074  | 3,247645634  | 20,3283765   | 7,22E-92  | 2,27E-90   | 5,55E-91   | TRUE |
| Rv1898  | 41   | 180  | -2,134301092 | -2,624440532 | -12,00946342 | 3,17E-33  | 3,48E-32   | 8,49E-33   | TRUE |
| Rv1900c | 28   | 85   | -1,602036014 | -2,092175454 | -7,214329458 | 5,42E-13  | 2,77E-12   | 6,76E-13   | TRUE |
| Rv1902c | 46   | 177  | -1,944043594 | -2,434183034 | -11,41592256 | 3,48E-30  | 3,65E-29   | 8,91E-30   | TRUE |
| Rv1904  | 141  | 43   | 1,713286598  | 1,223147158  | 5,328674979  | 9,89E-08  | 3,54E-07   | 8,66E-08   | TRUE |
| Rv1906c | 118  | 24   | 2,297680549  | 1,807541109  | 6,509796472  | 7,53E-11  | 3,41E-10   | 8,32E-11   | TRUE |
| Rv1908c | 1253 | 1029 | 0,284143432  | -0,205996008 | -3,431351955 | 0,000601  | 0,00137795 | 0,00033671 | TRUE |
| Rv1909c | 124  | 30   | 2,047305715  | 1,557166275  | 6,003861286  | 1,93E-09  | 7,93E-09   | 1,94E-09   | TRUE |
| Rv1911c | 132  | 141  | -0,095157233 | -0,585296673 | -3,375383738 | 0,000737  | 0,00166772 | 0,00040752 | TRUE |
| Rv1912c | 41   | 4    | 3,357552005  | 2,867412565  | 5,065662123  | 4,07E-07  | 1,38E-06   | 3,37E-07   | TRUE |
| Rv1915  | 249  | 104  | 1,259562214  | 0,769422774  | 4,819308006  | 1,44E-06  | 4,65E-06   | 1,14E-06   | TRUE |
| Rv1919c | 28   | 48   | -0,777607579 | -1,267747019 | -3,7894815   | 0,000151  | 0,00037959 | 9,28E-05   | TRUE |
| Rv1920  | 35   | 53   | -0,598637438 | -1,088776878 | -3,52756926  | 0,000419  | 0,00098837 | 0,00024151 | TRUE |
| Rv1927  | 22   | 99   | -2,169925001 | -2,660064441 | -8,971378188 | 2,93E-19  | 2,07E-18   | 5,06E-19   | TRUE |
| Rv1928c | 86   | 22   | 1,966833136  | 1,476693696  | 4,808079124  | 1,52E-06  | 4,90E-06   | 1,20E-06   | TRUE |
| Rv1931c | 16   | 33   | -1,044394119 | -1,534533559 | -3,631409209 | 0,000282  | 0,00068539 | 0,00016748 | TRUE |
| Rv1933c | 10   | 124  | -3,632268215 | -4,122407656 | -12,07683095 | 1,40E-33  | 1,56E-32   | 3,81E-33   | TRUE |
| Rv1934c | 34   | 0    | 6,087462841  | 5,597323401  | 5,610779812  | 2,01E-08  | 7,60E-08   | 1,86E-08   | TRUE |
| Rv1935c | 75   | 4    | 4,22881869   | 3,73867925   | 7,681321146  | 1,57E-14  | 8,78E-14   | 2,15E-14   | TRUE |
| Rv1936  | 811  | 11   | 6,204126486  | 5,713987046  | 27,41699296  | 1,72E-165 | 1,24E-163  | 3,04E-164  | TRUE |
| Rv1937  | 441  | 117  | 1,914270126  | 1,424130686  | 10,59867567  | 3,02E-26  | 2,82E-25   | 6,88E-26   | TRUE |
| Rv1938  | 179  | 14   | 3,676460855  | 3,186321415  | 11,12984551  | 8,98E-29  | 9,08E-28   | 2,22E-28   | TRUE |
| Rv1939  | 74   | 5    | 3,887525271  | 3,397385831  | 7,355864001  | 1,90E-13  | 9,93E-13   | 2,43E-13   | TRUE |
| Rv1949c | 46   | 9    | 2,353636955  | 1,863497515  | 4,149711128  | 3,33E-05  | 9,03E-05   | 2,21E-05   | TRUE |
| Rv1950c | 128  | 22   | 2,540568381  | 2,050428941  | 7,374094916  | 1,65E-13  | 8,70E-13   | 2,13E-13   | TRUE |

|         |      |      |              |              |              |           |            |            |      |
|---------|------|------|--------------|--------------|--------------|-----------|------------|------------|------|
| Rv1951c | 22   | 3    | 2,874469118  | 2,384329678  | 3,354941462  | 0,000794  | 0,00177948 | 0,00043458 | TRUE |
| Rv1952  | 36   | 2    | 4,169925001  | 3,679785561  | 5,291617937  | 1,21E-07  | 4,32E-07   | 1,06E-07   | TRUE |
| Rv1953  | 29   | 5    | 2,5360529    | 2,04591346   | 3,50480564   | 0,000457  | 0,00107008 | 0,00026124 | TRUE |
| Rv1954A | 1344 | 9    | 7,222392421  | 6,732252981  | 34,85828911  | 3,19E-266 | 5,93E-264  | 1,45E-264  | TRUE |
| Rv1955  | 533  | 3    | 7,473029222  | 6,982889782  | 21,7994931   | 2,35E-105 | 8,48E-104  | 2,07E-104  | TRUE |
| Rv1956  | 405  | 81   | 2,321928095  | 1,831788655  | 12,17256975  | 4,35E-34  | 4,94E-33   | 1,21E-33   | TRUE |
| Rv1957  | 185  | 2    | 6,531381461  | 6,04124202   | 13,08022018  | 4,27E-39  | 5,71E-38   | 1,40E-38   | TRUE |
| Rv1958c | 70   | 5    | 3,807354922  | 3,317215482  | 7,083188701  | 1,41E-12  | 7,01E-12   | 1,71E-12   | TRUE |
| Rv1959c | 186  | 13   | 3,838719093  | 3,348579653  | 11,59253826  | 4,50E-31  | 4,78E-30   | 1,17E-30   | TRUE |
| Rv1960c | 48   | 4    | 3,584962501  | 3,094823061  | 5,687177019  | 1,29E-08  | 4,97E-08   | 1,21E-08   | TRUE |
| Rv1961  | 50   | 3    | 4,058893689  | 3,568754249  | 6,165584334  | 7,02E-10  | 3,00E-09   | 7,33E-10   | TRUE |
| Rv1962A | 30   | 4    | 2,906890596  | 2,416751156  | 3,948765691  | 7,86E-05  | 0,00020329 | 4,97E-05   | TRUE |
| Rv1962c | 46   | 2    | 4,523561956  | 4,033422516  | 6,166718024  | 6,97E-10  | 2,99E-09   | 7,29E-10   | TRUE |
| Rv1964  | 51   | 4    | 3,672425342  | 3,182285902  | 5,937212204  | 2,90E-09  | 1,18E-08   | 2,89E-09   | TRUE |
| Rv1965  | 61   | 7    | 3,123382416  | 2,633242975  | 5,909313475  | 3,44E-09  | 1,39E-08   | 3,40E-09   | TRUE |
| Rv1966  | 51   | 6    | 3,087462841  | 2,597323401  | 5,362828088  | 8,19E-08  | 2,95E-07   | 7,21E-08   | TRUE |
| Rv1968  | 18   | 1    | 4,169925001  | 3,679785561  | 3,741720075  | 0,000183  | 0,00045386 | 0,00011073 | TRUE |
| Rv1971  | 23   | 2    | 3,523561956  | 3,033422516  | 3,899907717  | 9,62E-05  | 0,00024706 | 6,03E-05   | TRUE |
| Rv1976c | 62   | 7    | 3,146841388  | 2,656701948  | 5,986244891  | 2,15E-09  | 8,81E-09   | 2,15E-09   | TRUE |
| Rv1979c | 69   | 402  | -2,542527234 | -3,032666674 | -19,32448113 | 3,34E-83  | 9,82E-82   | 2,40E-82   | TRUE |
| Rv1982c | 79   | 102  | -0,368644594 | -0,858784034 | -4,017126844 | 5,89E-05  | 0,00015523 | 3,79E-05   | TRUE |
| Rv1985c | 448  | 164  | 1,449802917  | 0,959663477  | 7,802211789  | 6,08E-15  | 3,49E-14   | 8,54E-15   | TRUE |
| Rv1986  | 312  | 129  | 1,274174963  | 0,784035523  | 5,483448544  | 4,17E-08  | 1,54E-07   | 3,75E-08   | TRUE |
| Rv1987  | 51   | 332  | -2,702614089 | -3,192753529 | -17,98200211 | 2,70E-72  | 6,58E-71   | 1,61E-71   | TRUE |
| Rv1988  | 10   | 33   | -1,722466024 | -2,212605465 | -4,655542579 | 3,23E-06  | 9,96E-06   | 2,43E-06   | TRUE |
| Rv1989c | 318  | 1214 | -1,932669751 | -2,422809191 | -29,83525819 | 1,36E-195 | 1,27E-193  | 3,10E-194  | TRUE |
| Rv1990c | 434  | 1491 | -1,78051331  | -2,27065275  | -31,82264584 | 3,15E-222 | 3,61E-220  | 8,83E-221  | TRUE |
| Rv1991A | 59   | 240  | -2,024247546 | -2,514386986 | -13,54215496 | 8,82E-42  | 1,28E-40   | 3,13E-41   | TRUE |
| Rv1991c | 23   | 62   | -1,430634354 | -1,920773794 | -5,827121152 | 5,64E-09  | 2,25E-08   | 5,49E-09   | TRUE |
| Rv1992c | 170  | 274  | -0,688641147 | -1,178780587 | -8,551113036 | 1,22E-17  | 7,92E-17   | 1,94E-17   | TRUE |
| Rv1995  | 24   | 3    | 3            | 2,50986056   | 3,609238347  | 0,000307  | 0,00073934 | 0,00018066 | TRUE |
| Rv1996  | 219  | 476  | -1,120030704 | -1,610170144 | -14,28826768 | 2,59E-46  | 4,20E-45   | 1,03E-45   | TRUE |
| Rv1997  | 83   | 190  | -1,194816177 | -1,684955617 | -9,322655382 | 1,13E-20  | 8,55E-20   | 2,09E-20   | TRUE |
| Rv2003c | 8    | 24   | -1,584962501 | -2,075101941 | -3,813294602 | 0,000137  | 0,00034592 | 8,45E-05   | TRUE |
| Rv2004c | 40   | 143  | -1,837943242 | -2,328082682 | -9,995738448 | 1,59E-23  | 1,36E-22   | 3,33E-23   | TRUE |
| Rv2005c | 38   | 342  | -3,169925001 | -3,660064441 | -19,29427331 | 6,00E-83  | 1,75E-81   | 4,27E-82   | TRUE |
| Rv2006  | 15   | 99   | -2,722466024 | -3,212605465 | -9,845490338 | 7,17E-23  | 5,97E-22   | 1,46E-22   | TRUE |

|         |      |      |              |              |              |           |            |            |      |
|---------|------|------|--------------|--------------|--------------|-----------|------------|------------|------|
| Rv2007c | 146  | 898  | -2,620747076 | -3,110886516 | -29,23524588 | 6,92E-188 | 5,87E-186  | 1,43E-186  | TRUE |
| Rv2008c | 86   | 4    | 4,426264755  | 3,936125315  | 8,368479592  | 5,84E-17  | 3,67E-16   | 8,97E-17   | TRUE |
| Rv2010  | 103  | 175  | -0,764710585 | -1,254850025 | -7,178907548 | 7,03E-13  | 3,56E-12   | 8,71E-13   | TRUE |
| Rv2011c | 516  | 188  | 1,456638404  | 0,966498964  | 8,423497172  | 3,65E-17  | 2,33E-16   | 5,69E-17   | TRUE |
| Rv2012  | 176  | 4    | 5,459431619  | 4,969292179  | 12,6365887   | 1,33E-36  | 1,65E-35   | 4,03E-36   | TRUE |
| Rv2014  | 8    | 54   | -2,754887502 | -3,245026942 | -7,303456243 | 2,80E-13  | 1,46E-12   | 3,56E-13   | TRUE |
| Rv2016  | 101  | 17   | 2,570748642  | 2,080609201  | 6,612001266  | 3,79E-11  | 1,74E-10   | 4,26E-11   | TRUE |
| Rv2017  | 80   | 112  | -0,485426827 | -0,975566267 | -4,686094777 | 2,78E-06  | 8,68E-06   | 2,12E-06   | TRUE |
| Rv2018  | 75   | 26   | 1,528378972  | 1,038239532  | 3,406100495  | 0,000659  | 0,00150047 | 0,00036665 | TRUE |
| Rv2021c | 84   | 24   | 1,807354922  | 1,317215482  | 4,357436673  | 1,32E-05  | 3,75E-05   | 9,15E-06   | TRUE |
| Rv2022c | 244  | 271  | -0,151411704 | -0,641551144 | -5,080216102 | 3,77E-07  | 1,28E-06   | 3,13E-07   | TRUE |
| Rv2025c | 136  | 1    | 7,087462841  | 6,597323401  | 11,12210482  | 9,79E-29  | 9,88E-28   | 2,41E-28   | TRUE |
| Rv2026c | 25   | 162  | -2,695993813 | -3,186133253 | -12,54841815 | 4,06E-36  | 4,87E-35   | 1,19E-35   | TRUE |
| Rv2027c | 45   | 3    | 3,906890596  | 3,416751156  | 5,749515552  | 8,95E-09  | 3,49E-08   | 8,54E-09   | TRUE |
| Rv2029c | 22   | 53   | -1,268488836 | -1,758628276 | -5,07334935  | 3,91E-07  | 1,32E-06   | 3,23E-07   | TRUE |
| Rv2030c | 90   | 616  | -2,774933444 | -3,265072884 | -24,7399386  | 3,98E-135 | 2,04E-133  | 4,99E-134  | TRUE |
| Rv2031c | 89   | 963  | -3,435658557 | -3,925797997 | -33,17122605 | 2,80E-241 | 3,77E-239  | 9,21E-240  | TRUE |
| Rv2032  | 144  | 479  | -1,733956844 | -2,224096284 | -17,79885402 | 7,21E-71  | 1,70E-69   | 4,15E-70   | TRUE |
| Rv2036  | 1088 | 165  | 2,721140627  | 2,231001187  | 22,6816737   | 6,80E-114 | 2,79E-112  | 6,83E-113  | TRUE |
| Rv2039c | 8    | 92   | -3,523561956 | -4,013701396 | -10,32064817 | 5,68E-25  | 5,05E-24   | 1,23E-24   | TRUE |
| Rv2045c | 75   | 25   | 1,584962501  | 1,094823061  | 3,556682153  | 0,000376  | 0,00089645 | 0,00021905 | TRUE |
| Rv2048c | 1387 | 1127 | 0,299480272  | -0,190659168 | -3,332974535 | 0,000859  | 0,00191512 | 0,00046776 | TRUE |
| Rv2050  | 420  | 215  | 0,966052668  | 0,475913228  | 4,074114315  | 4,62E-05  | 0,00012346 | 3,02E-05   | TRUE |
| Rv2051c | 64   | 126  | -0,977279923 | -1,467419364 | -6,865412878 | 6,63E-12  | 3,20E-11   | 7,82E-12   | TRUE |
| Rv2052c | 107  | 16   | 2,741466986  | 2,251327546  | 7,149315017  | 8,72E-13  | 4,39E-12   | 1,07E-12   | TRUE |
| Rv2053c | 155  | 62   | 1,321928095  | 0,831788655  | 4,066051454  | 4,78E-05  | 0,00012772 | 3,12E-05   | TRUE |
| Rv2058c | 3    | 35   | -3,544320516 | -4,034459956 | -6,375532844 | 1,82E-10  | 8,04E-10   | 1,96E-10   | TRUE |
| Rv2059  | 158  | 286  | -0,856090589 | -1,346230029 | -9,691994933 | 3,26E-22  | 2,61E-21   | 6,38E-22   | TRUE |
| Rv2062c | 19   | 167  | -3,135776779 | -3,625916219 | -13,43515879 | 3,76E-41  | 5,40E-40   | 1,32E-40   | TRUE |
| Rv2068c | 127  | 18   | 2,818759685  | 2,328620245  | 7,949152946  | 1,88E-15  | 1,10E-14   | 2,69E-15   | TRUE |
| Rv2076c | 272  | 33   | 3,043068722  | 2,552929282  | 12,268369    | 1,34E-34  | 1,55E-33   | 3,78E-34   | TRUE |
| Rv2077c | 847  | 484  | 0,807354922  | 0,317215482  | 3,965477476  | 7,32E-05  | 0,00019069 | 4,66E-05   | TRUE |
| Rv2078  | 0    | 12   | -4,584962501 | -5,075101941 | -3,921139694 | 8,81E-05  | 0,00022731 | 5,55E-05   | TRUE |
| Rv2079  | 49   | 79   | -0,689070904 | -1,179210344 | -4,592060812 | 4,39E-06  | 1,33E-05   | 3,24E-06   | TRUE |
| Rv2080  | 21   | 38   | -0,855610091 | -1,345749531 | -3,531083582 | 0,000414  | 0,00097651 | 0,00023862 | TRUE |
| Rv2084  | 11   | 50   | -2,184424571 | -2,674564011 | -6,394170795 | 1,61E-10  | 7,17E-10   | 1,75E-10   | TRUE |
| Rv2087  | 26   | 4    | 2,700439718  | 2,210300278  | 3,484523047  | 0,000493  | 0,00114939 | 0,00028069 | TRUE |

|         |     |     |              |              |              |          |            |            |      |
|---------|-----|-----|--------------|--------------|--------------|----------|------------|------------|------|
| Rv2091c | 160 | 509 | -1,669593751 | -2,159733191 | -18,01711441 | 1,43E-72 | 3,56E-71   | 8,69E-72   | TRUE |
| Rv2092c | 57  | 74  | -0,376563351 | -0,866702792 | -3,448329872 | 0,000564 | 0,00129951 | 0,00031754 | TRUE |
| Rv2093c | 307 | 76  | 2,014167332  | 1,524027892  | 9,300111708  | 1,40E-20 | 1,05E-19   | 2,57E-20   | TRUE |
| Rv2094c | 200 | 311 | -0,63691458  | -1,12705402  | -8,789202185 | 1,51E-18 | 1,04E-17   | 2,53E-18   | TRUE |
| Rv2101  | 49  | 95  | -0,955145764 | -1,445285204 | -5,893823632 | 3,77E-09 | 1,53E-08   | 3,73E-09   | TRUE |
| Rv2103c | 50  | 13  | 1,943416472  | 1,453277032  | 3,62258318   | 0,000292 | 0,00070526 | 0,00017223 | TRUE |
| Rv2106  | 18  | 56  | -1,637429921 | -2,127569361 | -5,918255403 | 3,25E-09 | 1,32E-08   | 3,23E-09   | TRUE |
| Rv2108  | 28  | 5   | 2,485426827  | 1,995287387  | 3,388223397  | 0,000703 | 0,00159619 | 0,00038962 | TRUE |
| Rv2110c | 197 | 56  | 1,814696897  | 1,324557457  | 6,702194212  | 2,05E-11 | 9,62E-11   | 2,35E-11   | TRUE |
| Rv2111c | 197 | 37  | 2,412598454  | 1,922459014  | 8,769939149  | 1,79E-18 | 1,22E-17   | 2,98E-18   | TRUE |
| Rv2124c | 237 | 320 | -0,433184846 | -0,923324286 | -7,566575656 | 3,83E-14 | 2,08E-13   | 5,09E-14   | TRUE |
| Rv2128  | 23  | 3   | 2,938599455  | 2,448460015  | 3,483678286  | 0,000495 | 0,0011513  | 0,00028124 | TRUE |
| Rv2130c | 206 | 25  | 3,042644337  | 2,552504897  | 10,67539302  | 1,33E-26 | 1,26E-25   | 3,07E-26   | TRUE |
| Rv2131c | 59  | 12  | 2,297680549  | 1,807541109  | 4,602975774  | 4,16E-06 | 1,26E-05   | 3,09E-06   | TRUE |
| Rv2133c | 77  | 15  | 2,359895945  | 1,869756505  | 5,381167929  | 7,40E-08 | 2,68E-07   | 6,54E-08   | TRUE |
| Rv2134c | 273 | 69  | 1,984232684  | 1,494093244  | 8,642311142  | 5,51E-18 | 3,68E-17   | 9,00E-18   | TRUE |
| Rv2136c | 63  | 127 | -1,011404763 | -1,501544203 | -7,011303921 | 2,36E-12 | 1,16E-11   | 2,83E-12   | TRUE |
| Rv2137c | 313 | 711 | -1,183686903 | -1,673826343 | -17,95708238 | 4,22E-72 | 1,02E-70   | 2,50E-71   | TRUE |
| Rv2138  | 69  | 16  | 2,108524457  | 1,618385017  | 4,605425086  | 4,12E-06 | 1,25E-05   | 3,05E-06   | TRUE |
| Rv2142c | 39  | 8   | 2,285402219  | 1,795262779  | 3,724811106  | 0,000195 | 0,0004837  | 0,00011817 | TRUE |
| Rv2145c | 155 | 37  | 2,06667104   | 1,5765316    | 6,77335071   | 1,26E-11 | 5,96E-11   | 1,46E-11   | TRUE |
| Rv2146c | 153 | 61  | 1,326650505  | 0,836511065  | 4,05933883   | 4,92E-05 | 0,00013109 | 3,20E-05   | TRUE |
| Rv2152c | 9   | 26  | -1,530514717 | -2,020654157 | -3,901506284 | 9,56E-05 | 0,00024584 | 6,01E-05   | TRUE |
| Rv2155c | 37  | 77  | -1,057333175 | -1,547472615 | -5,581514817 | 2,38E-08 | 8,94E-08   | 2,19E-08   | TRUE |
| Rv2158c | 193 | 381 | -0,98119015  | -1,47132959  | -11,96461976 | 5,44E-33 | 5,92E-32   | 1,45E-32   | TRUE |
| Rv2163c | 93  | 119 | -0,355658952 | -0,845798392 | -4,283088633 | 1,84E-05 | 5,17E-05   | 1,26E-05   | TRUE |
| Rv2165c | 164 | 33  | 2,313157885  | 1,823018445  | 7,719637751  | 1,17E-14 | 6,57E-14   | 1,61E-14   | TRUE |
| Rv2172c | 304 | 55  | 2,4665678    | 1,97642836   | 11,09648191  | 1,30E-28 | 1,31E-27   | 3,19E-28   | TRUE |
| Rv2173  | 29  | 5   | 2,5360529    | 2,04591346   | 3,50480564   | 0,000457 | 0,00107008 | 0,00026124 | TRUE |
| Rv2174  | 43  | 8   | 2,426264755  | 1,936125315  | 4,116338757  | 3,85E-05 | 0,0001037  | 2,53E-05   | TRUE |
| Rv2175c | 26  | 2   | 3,700439718  | 3,210300278  | 4,255775205  | 2,08E-05 | 5,79E-05   | 1,42E-05   | TRUE |
| Rv2176  | 35  | 8   | 2,129283017  | 1,639143577  | 3,310118966  | 0,000933 | 0,0020528  | 0,00050133 | TRUE |
| Rv2177c | 21  | 2   | 3,392317423  | 2,902177983  | 3,647272202  | 0,000265 | 0,00064767 | 0,00015816 | TRUE |
| Rv2182c | 611 | 322 | 0,924111692  | 0,433972252  | 4,514332782  | 6,35E-06 | 1,87E-05   | 4,57E-06   | TRUE |
| Rv2185c | 59  | 167 | -1,501061243 | -1,991200683 | -9,794602587 | 1,19E-22 | 9,74E-22   | 2,38E-22   | TRUE |
| Rv2188c | 32  | 71  | -1,14974712  | -1,63988656  | -5,589448258 | 2,28E-08 | 8,55E-08   | 2,09E-08   | TRUE |
| Rv2193  | 54  | 7   | 2,94753258   | 2,45739314   | 5,349166144  | 8,84E-08 | 3,18E-07   | 7,76E-08   | TRUE |

|         |     |      |              |              |              |          |            |            |      |
|---------|-----|------|--------------|--------------|--------------|----------|------------|------------|------|
| Rv2195  | 83  | 23   | 1,851477475  | 1,361338035  | 4,442408214  | 8,90E-06 | 2,59E-05   | 6,33E-06   | TRUE |
| Rv2196  | 59  | 89   | -0,593090382 | -1,083229822 | -4,552468559 | 5,30E-06 | 1,58E-05   | 3,86E-06   | TRUE |
| Rv2197c | 27  | 48   | -0,830074999 | -1,320214439 | -3,910594309 | 9,21E-05 | 0,00023716 | 5,80E-05   | TRUE |
| Rv2198c | 299 | 134  | 1,157912484  | 0,667773044  | 4,665031731  | 3,09E-06 | 9,53E-06   | 2,33E-06   | TRUE |
| Rv2202c | 387 | 380  | 0,026334148  | -0,463805292 | -4,485756223 | 7,27E-06 | 2,13E-05   | 5,20E-06   | TRUE |
| Rv2203  | 37  | 72   | -0,960471636 | -1,450611076 | -5,145050393 | 2,67E-07 | 9,23E-07   | 2,25E-07   | TRUE |
| Rv2204c | 930 | 1221 | -0,392760579 | -0,882900019 | -14,24590025 | 4,75E-46 | 7,64E-45   | 1,87E-45   | TRUE |
| Rv2206  | 34  | 75   | -1,141355849 | -1,631495289 | -5,723680485 | 1,04E-08 | 4,05E-08   | 9,90E-09   | TRUE |
| Rv2210c | 59  | 14   | 2,075288127  | 1,585148687  | 4,195254465  | 2,73E-05 | 7,50E-05   | 1,83E-05   | TRUE |
| Rv2212  | 27  | 44   | -0,704544116 | -1,194683557 | -3,462607307 | 0,000535 | 0,00123539 | 0,00030188 | TRUE |
| Rv2216  | 64  | 9    | 2,830074999  | 2,339935559  | 5,659139041  | 1,52E-08 | 5,80E-08   | 1,42E-08   | TRUE |
| Rv2218  | 112 | 40   | 1,485426827  | 0,995287387  | 4,020045734  | 5,82E-05 | 0,00015353 | 3,75E-05   | TRUE |
| Rv2219  | 131 | 160  | -0,288505093 | -0,778644533 | -4,625835699 | 3,73E-06 | 1,14E-05   | 2,78E-06   | TRUE |
| Rv2220  | 101 | 303  | -1,584962501 | -2,075101941 | -13,55186737 | 7,72E-42 | 1,13E-40   | 2,75E-41   | TRUE |
| Rv2221c | 126 | 254  | -1,011404763 | -1,501544203 | -9,916534692 | 3,53E-23 | 2,99E-22   | 7,30E-23   | TRUE |
| Rv2230c | 33  | 263  | -2,99452487  | -3,48466431  | -16,60561208 | 6,35E-62 | 1,33E-60   | 3,26E-61   | TRUE |
| Rv2235  | 33  | 6    | 2,459431619  | 1,969292179  | 3,646801958  | 0,000266 | 0,00064784 | 0,00015816 | TRUE |
| Rv2239c | 75  | 21   | 1,836501268  | 1,346361828  | 4,18726904   | 2,82E-05 | 7,75E-05   | 1,89E-05   | TRUE |
| Rv2244  | 104 | 134  | -0,365649472 | -0,855788912 | -4,590822991 | 4,42E-06 | 1,33E-05   | 3,26E-06   | TRUE |
| Rv2247  | 89  | 148  | -0,733719935 | -1,223859375 | -6,473395099 | 9,58E-11 | 4,32E-10   | 1,05E-10   | TRUE |
| Rv2253  | 2   | 128  | -6           | -6,49013944  | -12,81594808 | 1,33E-37 | 1,73E-36   | 4,22E-37   | TRUE |
| Rv2256c | 386 | 194  | 0,992544195  | 0,502404755  | 4,104125571  | 4,06E-05 | 0,00010922 | 2,67E-05   | TRUE |
| Rv2258c | 28  | 53   | -0,920565533 | -1,410704973 | -4,322579693 | 1,54E-05 | 4,35E-05   | 1,06E-05   | TRUE |
| Rv2260  | 3   | 53   | -4,142957954 | -4,633097394 | -8,121863432 | 4,59E-16 | 2,78E-15   | 6,80E-16   | TRUE |
| Rv2263  | 21  | 42   | -1           | -1,49013944  | -4,009016476 | 6,10E-05 | 0,00016023 | 3,92E-05   | TRUE |
| Rv2264c | 66  | 15   | 2,137503524  | 1,647364084  | 4,56187192   | 5,07E-06 | 1,52E-05   | 3,71E-06   | TRUE |
| Rv2273  | 0   | 10   | -4,321928095 | -4,812067535 | -3,552252568 | 0,000382 | 0,00091001 | 0,00022233 | TRUE |
| Rv2279  | 16  | 51   | -1,672425342 | -2,162564782 | -5,706040724 | 1,16E-08 | 4,47E-08   | 1,09E-08   | TRUE |
| Rv2285  | 20  | 103  | -2,364572432 | -2,854711872 | -9,494693796 | 2,21E-21 | 1,71E-20   | 4,17E-21   | TRUE |
| Rv2286c | 42  | 10   | 2,070389328  | 1,580249888  | 3,531645707  | 0,000413 | 0,00097562 | 0,0002384  | TRUE |
| Rv2289  | 22  | 48   | -1,125530882 | -1,615670322 | -4,546884845 | 5,44E-06 | 1,62E-05   | 3,96E-06   | TRUE |
| Rv2293c | 9   | 54   | -2,584962501 | -3,075101941 | -7,127847886 | 1,02E-12 | 5,12E-12   | 1,25E-12   | TRUE |
| Rv2295  | 392 | 28   | 3,807354922  | 3,317215482  | 16,76359707  | 4,51E-63 | 9,67E-62   | 2,36E-62   | TRUE |
| Rv2296  | 137 | 14   | 3,290677161  | 2,800537721  | 9,149653196  | 5,71E-20 | 4,16E-19   | 1,02E-19   | TRUE |
| Rv2297  | 155 | 32   | 2,276124405  | 1,785984965  | 7,39968121   | 1,37E-13 | 7,21E-13   | 1,76E-13   | TRUE |
| Rv2298  | 124 | 17   | 2,866733469  | 2,376594029  | 7,950140456  | 1,86E-15 | 1,09E-14   | 2,67E-15   | TRUE |
| Rv2299c | 233 | 97   | 1,264273302  | 0,774133862  | 4,686557959  | 2,78E-06 | 8,67E-06   | 2,12E-06   | TRUE |



|         |     |     |              |              |              |           |            |            |      |
|---------|-----|-----|--------------|--------------|--------------|-----------|------------|------------|------|
| Rv2301  | 64  | 17  | 1,912537159  | 1,422397719  | 4,032958483  | 5,51E-05  | 0,00014572 | 3,56E-05   | TRUE |
| Rv2305  | 33  | 6   | 2,459431619  | 1,969292179  | 3,646801958  | 0,000266  | 0,00064784 | 0,00015816 | TRUE |
| Rv2307A | 26  | 1   | 4,700439718  | 4,210300278  | 4,693399321  | 2,69E-06  | 8,40E-06   | 2,05E-06   | TRUE |
| Rv2307B | 36  | 60  | -0,736965594 | -1,227105034 | -4,129976819 | 3,63E-05  | 9,80E-05   | 2,40E-05   | TRUE |
| Rv2307D | 66  | 0   | 7,044394119  | 6,554254679  | 7,755025481  | 8,83E-15  | 5,02E-14   | 1,23E-14   | TRUE |
| Rv2314c | 109 | 200 | -0,875671865 | -1,365811305 | -8,194254595 | 2,52E-16  | 1,55E-15   | 3,78E-16   | TRUE |
| Rv2318  | 11  | 56  | -2,347923303 | -2,838062743 | -6,980048487 | 2,95E-12  | 1,44E-11   | 3,51E-12   | TRUE |
| Rv2322c | 15  | 1   | 3,906890596  | 3,416751156  | 3,319453818  | 0,000902  | 0,00199607 | 0,00048679 | TRUE |
| Rv2329c | 34  | 147 | -2,112209504 | -2,602348944 | -10,80263056 | 3,34E-27  | 3,24E-26   | 7,92E-27   | TRUE |
| Rv2330c | 1   | 51  | -5,672425342 | -6,162564782 | -8,129918528 | 4,30E-16  | 2,61E-15   | 6,38E-16   | TRUE |
| Rv2331  | 35  | 251 | -2,842260537 | -3,332399977 | -15,92829813 | 4,03E-57  | 7,76E-56   | 1,90E-56   | TRUE |
| Rv2331A | 14  | 41  | -1,550197083 | -2,040336523 | -4,930268842 | 8,21E-07  | 2,71E-06   | 6,63E-07   | TRUE |
| Rv2332  | 192 | 346 | -0,849665727 | -1,339805167 | -10,62178271 | 2,36E-26  | 2,23E-25   | 5,44E-26   | TRUE |
| Rv2333c | 199 | 316 | -0,667156128 | -1,157295568 | -9,049762078 | 1,43E-19  | 1,03E-18   | 2,52E-19   | TRUE |
| Rv2334  | 46  | 78  | -0,761840263 | -1,251979703 | -4,783764142 | 1,72E-06  | 5,51E-06   | 1,35E-06   | TRUE |
| Rv2336  | 16  | 1   | 4            | 3,50986056   | 3,465376216  | 0,000529  | 0,00122564 | 0,00029914 | TRUE |
| Rv2338c | 69  | 4   | 4,108524457  | 3,618385017  | 7,280799702  | 3,32E-13  | 1,72E-12   | 4,20E-13   | TRUE |
| Rv2344c | 32  | 52  | -0,700439718 | -1,190579158 | -3,754015947 | 0,000174  | 0,00043395 | 0,00010604 | TRUE |
| Rv2348c | 104 | 19  | 2,452512205  | 1,962372765  | 6,459213467  | 1,05E-10  | 4,71E-10   | 1,15E-10   | TRUE |
| Rv2352c | 353 | 377 | -0,09489634  | -0,58503578  | -5,518589966 | 3,42E-08  | 1,27E-07   | 3,10E-08   | TRUE |
| Rv2353c | 22  | 1   | 4,459431619  | 3,969292179  | 4,243748384  | 2,20E-05  | 6,09E-05   | 1,49E-05   | TRUE |
| Rv2354  | 25  | 42  | -0,748461233 | -1,238600673 | -3,480757896 | 0,0005    | 0,00116289 | 0,00028416 | TRUE |
| Rv2355  | 14  | 54  | -1,94753258  | -2,43767202  | -6,310276226 | 2,79E-10  | 1,22E-09   | 2,98E-10   | TRUE |
| Rv2356c | 208 | 22  | 3,2410081    | 2,750868659  | 11,17003971  | 5,72E-29  | 5,86E-28   | 1,43E-28   | TRUE |
| Rv2360c | 18  | 1   | 4,169925001  | 3,679785561  | 3,741720075  | 0,000183  | 0,00045386 | 0,00011073 | TRUE |
| Rv2361c | 56  | 10  | 2,485426827  | 1,995287387  | 4,791738808  | 1,65E-06  | 5,30E-06   | 1,29E-06   | TRUE |
| Rv2362c | 57  | 86  | -0,593374741 | -1,083514181 | -4,476025021 | 7,60E-06  | 2,22E-05   | 5,43E-06   | TRUE |
| Rv2363  | 23  | 52  | -1,176877762 | -1,667017202 | -4,839708238 | 1,30E-06  | 4,22E-06   | 1,03E-06   | TRUE |
| Rv2364c | 19  | 1   | 4,247927513  | 3,757788073  | 3,873034813  | 0,000107  | 0,00027479 | 6,71E-05   | TRUE |
| Rv2366c | 43  | 11  | 1,966833136  | 1,476693696  | 3,399737544  | 0,000675  | 0,00153315 | 0,00037463 | TRUE |
| Rv2367c | 50  | 6   | 3,058893689  | 2,568754249  | 5,277646198  | 1,31E-07  | 4,65E-07   | 1,14E-07   | TRUE |
| Rv2368c | 200 | 92  | 1,120294234  | 0,630154794  | 3,623682473  | 0,00029   | 0,00070357 | 0,00017192 | TRUE |
| Rv2372c | 168 | 37  | 2,182864057  | 1,692724617  | 7,420500422  | 1,17E-13  | 6,20E-13   | 1,51E-13   | TRUE |
| Rv2373c | 820 | 175 | 2,228268988  | 1,738129548  | 16,70779105  | 1,15E-62  | 2,44E-61   | 5,96E-62   | TRUE |
| Rv2374c | 444 | 116 | 1,936434871  | 1,446295431  | 10,75877422  | 5,39E-27  | 5,20E-26   | 1,27E-26   | TRUE |
| Rv2376c | 6   | 96  | -4           | -4,49013944  | -10,85941162 | 1,80E-27  | 1,76E-26   | 4,30E-27   | TRUE |
| Rv2380c | 57  | 487 | -3,094887948 | -3,585027388 | -22,84850777 | 1,51E-115 | 6,42E-114  | 1,57E-114  | TRUE |

|         |     |     |              |              |              |           |            |            |      |
|---------|-----|-----|--------------|--------------|--------------|-----------|------------|------------|------|
| Rv2383c | 51  | 188 | -1,88216351  | -2,37230295  | -11,58993841 | 4,63E-31  | 4,92E-30   | 1,20E-30   | TRUE |
| Rv2385  | 1   | 15  | -3,906890596 | -4,397030036 | -4,271817722 | 1,94E-05  | 5,42E-05   | 1,32E-05   | TRUE |
| Rv2389c | 106 | 41  | 1,37036845   | 0,88022901   | 3,528422459  | 0,000418  | 0,00098579 | 0,00024088 | TRUE |
| Rv2390c | 45  | 5   | 3,169925001  | 2,679785561  | 5,123678572  | 3,00E-07  | 1,03E-06   | 2,52E-07   | TRUE |
| Rv2391  | 362 | 28  | 3,692490965  | 3,202351525  | 15,86412232  | 1,12E-56  | 2,14E-55   | 5,23E-56   | TRUE |
| Rv2392  | 50  | 5   | 3,321928095  | 2,831788655  | 5,558818098  | 2,72E-08  | 1,01E-07   | 2,47E-08   | TRUE |
| Rv2395  | 52  | 130 | -1,321928095 | -1,812067535 | -8,11207446  | 4,98E-16  | 3,01E-15   | 7,35E-16   | TRUE |
| Rv2395A | 248 | 327 | -0,398950515 | -0,889089955 | -7,409193602 | 1,27E-13  | 6,72E-13   | 1,64E-13   | TRUE |
| Rv2395B | 145 | 206 | -0,506591437 | -0,996730877 | -6,470000825 | 9,80E-11  | 4,41E-10   | 1,08E-10   | TRUE |
| Rv2396  | 111 | 388 | -1,805496976 | -2,295636416 | -16,32966602 | 6,07E-60  | 1,21E-58   | 2,96E-59   | TRUE |
| Rv2398c | 82  | 96  | -0,227410496 | -0,717549936 | -3,336934113 | 0,000847  | 0,00189236 | 0,00046241 | TRUE |
| Rv2399c | 117 | 302 | -1,36804002  | -1,85817946  | -12,57943941 | 2,74E-36  | 3,33E-35   | 8,14E-36   | TRUE |
| Rv2400c | 244 | 288 | -0,239187664 | -0,729327104 | -5,863854081 | 4,52E-09  | 1,82E-08   | 4,45E-09   | TRUE |
| Rv2403c | 33  | 49  | -0,570315725 | -1,060455165 | -3,319854302 | 0,000901  | 0,0019983  | 0,00048679 | TRUE |
| Rv2405  | 77  | 13  | 2,566346823  | 2,076207383  | 5,765328214  | 8,15E-09  | 3,20E-08   | 7,81E-09   | TRUE |
| Rv2406c | 144 | 153 | -0,087462841 | -0,577602281 | -3,474540767 | 0,000512  | 0,00118876 | 0,00029048 | TRUE |
| Rv2409c | 38  | 99  | -1,381429107 | -1,871568547 | -7,236366232 | 4,61E-13  | 2,36E-12   | 5,77E-13   | TRUE |
| Rv2410c | 33  | 181 | -2,455451768 | -2,945591208 | -12,78465266 | 2,00E-37  | 2,57E-36   | 6,27E-37   | TRUE |
| Rv2411c | 105 | 322 | -1,61667136  | -2,1068108   | -14,10620353 | 3,48E-45  | 5,48E-44   | 1,34E-44   | TRUE |
| Rv2413c | 24  | 41  | -0,772589504 | -1,262728944 | -3,491431748 | 0,00048   | 0,00112275 | 0,00027435 | TRUE |
| Rv2416c | 15  | 121 | -3,011972642 | -3,502112082 | -11,28495    | 1,56E-29  | 1,61E-28   | 3,93E-29   | TRUE |
| Rv2420c | 21  | 45  | -1,099535674 | -1,589675114 | -4,351216077 | 1,35E-05  | 3,84E-05   | 9,40E-06   | TRUE |
| Rv2421c | 163 | 520 | -1,673639659 | -2,163779099 | -18,23221035 | 2,87E-74  | 7,31E-73   | 1,79E-73   | TRUE |
| Rv2428  | 10  | 252 | -4,655351829 | -5,145491269 | -17,99829392 | 2,01E-72  | 4,97E-71   | 1,21E-71   | TRUE |
| Rv2429  | 5   | 31  | -2,632268215 | -3,122407656 | -5,438854204 | 5,36E-08  | 1,96E-07   | 4,80E-08   | TRUE |
| Rv2430c | 91  | 694 | -2,930997212 | -3,421136652 | -26,78112071 | 5,36E-158 | 3,49E-156  | 8,53E-157  | TRUE |
| Rv2431c | 52  | 417 | -3,003463855 | -3,493603295 | -20,93210295 | 2,73E-97  | 9,20E-96   | 2,25E-96   | TRUE |
| Rv2434c | 20  | 63  | -1,655351829 | -2,145491269 | -6,310534762 | 2,78E-10  | 1,22E-09   | 2,98E-10   | TRUE |
| Rv2437  | 3   | 22  | -2,874469118 | -3,364608558 | -4,7342718   | 2,20E-06  | 6,92E-06   | 1,69E-06   | TRUE |
| Rv2438c | 158 | 262 | -0,729642253 | -1,219781693 | -8,591225682 | 8,60E-18  | 5,67E-17   | 1,38E-17   | TRUE |
| Rv2440c | 163 | 171 | -0,069124361 | -0,559263801 | -3,568019542 | 0,00036   | 0,00086065 | 0,00021031 | TRUE |
| Rv2441c | 167 | 253 | -0,599289282 | -1,089428722 | -7,712453696 | 1,23E-14  | 6,93E-14   | 1,69E-14   | TRUE |
| Rv2443  | 41  | 66  | -0,686842115 | -1,176981555 | -4,190896182 | 2,78E-05  | 7,63E-05   | 1,86E-05   | TRUE |
| Rv2444c | 791 | 460 | 0,782043834  | 0,291904393  | 3,541718067  | 0,000398  | 0,00094311 | 0,00023045 | TRUE |
| Rv2445c | 12  | 228 | -4,247927513 | -4,738066953 | -16,91747965 | 3,34E-64  | 7,34E-63   | 1,79E-63   | TRUE |
| Rv2447c | 7   | 29  | -2,050626073 | -2,540765513 | -4,734503175 | 2,20E-06  | 6,92E-06   | 1,69E-06   | TRUE |
| Rv2448c | 138 | 212 | -0,619395998 | -1,109535438 | -7,164924388 | 7,78E-13  | 3,94E-12   | 9,62E-13   | TRUE |

|         |      |     |              |              |              |           |            |            |      |
|---------|------|-----|--------------|--------------|--------------|-----------|------------|------------|------|
| Rv2449c | 34   | 83  | -1,28757659  | -1,77771603  | -6,396722454 | 1,59E-10  | 7,06E-10   | 1,73E-10   | TRUE |
| Rv2452c | 38   | 0   | 6,247927513  | 5,757788073  | 5,934372354  | 2,95E-09  | 1,20E-08   | 2,94E-09   | TRUE |
| Rv2453c | 71   | 123 | -0,792767386 | -1,282906826 | -6,122977295 | 9,18E-10  | 3,86E-09   | 9,44E-10   | TRUE |
| Rv2457c | 460  | 249 | 0,885488119  | 0,395348679  | 3,591886984  | 0,000328  | 0,00078843 | 0,00019266 | TRUE |
| Rv2459  | 78   | 101 | -0,372809264 | -0,862948704 | -4,013869261 | 5,97E-05  | 0,00015718 | 3,84E-05   | TRUE |
| Rv2461c | 578  | 233 | 1,310739538  | 0,820600098  | 7,763728027  | 8,25E-15  | 4,71E-14   | 1,15E-14   | TRUE |
| Rv2463  | 56   | 167 | -1,57634937  | -2,06648881  | -10,03315519 | 1,09E-23  | 9,37E-23   | 2,29E-23   | TRUE |
| Rv2464c | 171  | 15  | 3,510961919  | 3,020822479  | 10,61332922  | 2,58E-26  | 2,43E-25   | 5,93E-26   | TRUE |
| Rv2466c | 362  | 178 | 1,024112456  | 0,533973016  | 4,20107924   | 2,66E-05  | 7,33E-05   | 1,79E-05   | TRUE |
| Rv2468A | 24   | 2   | 3,584962501  | 3,094823061  | 4,021408351  | 5,79E-05  | 0,0001528  | 3,73E-05   | TRUE |
| Rv2470  | 59   | 17  | 1,795180208  | 1,305040768  | 3,625718765  | 0,000288  | 0,00069935 | 0,00017089 | TRUE |
| Rv2471  | 56   | 15  | 1,900464326  | 1,410324886  | 3,748283293  | 0,000178  | 0,0004437  | 0,00010842 | TRUE |
| Rv2472  | 36   | 2   | 4,169925001  | 3,679785561  | 5,291617937  | 1,21E-07  | 4,32E-07   | 1,06E-07   | TRUE |
| Rv2473  | 33   | 136 | -2,043068722 | -2,533208162 | -10,23639678 | 1,36E-24  | 1,20E-23   | 2,93E-24   | TRUE |
| Rv2477c | 274  | 762 | -1,475615105 | -1,965754545 | -20,75486519 | 1,11E-95  | 3,70E-94   | 9,04E-95   | TRUE |
| Rv2484c | 94   | 30  | 1,647698256  | 1,157558816  | 4,16448403   | 3,12E-05  | 8,50E-05   | 2,08E-05   | TRUE |
| Rv2487c | 32   | 4   | 3            | 2,50986056   | 4,167603461  | 3,08E-05  | 8,39E-05   | 2,05E-05   | TRUE |
| Rv2495c | 212  | 233 | -0,13626569  | -0,62640513  | -4,611278682 | 4,00E-06  | 1,22E-05   | 2,97E-06   | TRUE |
| Rv2496c | 616  | 582 | 0,081911198  | -0,408228242 | -4,934764704 | 8,02E-07  | 2,65E-06   | 6,48E-07   | TRUE |
| Rv2500c | 527  | 784 | -0,573050692 | -1,063190133 | -13,3168903  | 1,85E-40  | 2,56E-39   | 6,25E-40   | TRUE |
| Rv2501c | 402  | 148 | 1,441598326  | 0,951458886  | 7,337806689  | 2,17E-13  | 1,13E-12   | 2,77E-13   | TRUE |
| Rv2502c | 154  | 36  | 2,096861539  | 1,606722099  | 6,844842255  | 7,66E-12  | 3,66E-11   | 8,95E-12   | TRUE |
| Rv2503c | 496  | 97  | 2,354283468  | 1,864144028  | 13,63278026  | 2,56E-42  | 3,74E-41   | 9,14E-42   | TRUE |
| Rv2504c | 431  | 10  | 5,429615964  | 4,939476524  | 19,75889129  | 6,73E-87  | 2,04E-85   | 4,98E-86   | TRUE |
| Rv2505c | 96   | 18  | 2,415037499  | 1,924898059  | 6,126939288  | 8,96E-10  | 3,77E-09   | 9,22E-10   | TRUE |
| Rv2507  | 60   | 183 | -1,608809243 | -2,098948683 | -10,60803443 | 2,73E-26  | 2,55E-25   | 6,24E-26   | TRUE |
| Rv2508c | 22   | 2   | 3,459431619  | 2,969292179  | 3,775269792  | 0,00016   | 0,00040113 | 9,79E-05   | TRUE |
| Rv2510c | 69   | 9   | 2,938599455  | 2,448460015  | 6,03402683   | 1,60E-09  | 6,60E-09   | 1,61E-09   | TRUE |
| Rv2511  | 19   | 181 | -3,251918374 | -3,742057814 | -14,14742014 | 1,94E-45  | 3,06E-44   | 7,48E-45   | TRUE |
| Rv2512c | 24   | 40  | -0,736965594 | -1,227105034 | -3,372049912 | 0,000746  | 0,00168706 | 0,00041224 | TRUE |
| Rv2514c | 304  | 3   | 6,662965013  | 6,172825573  | 16,74660429  | 6,00E-63  | 1,28E-61   | 3,13E-62   | TRUE |
| Rv2515c | 999  | 183 | 2,44864103   | 1,958501589  | 20,00217208  | 5,27E-89  | 1,63E-87   | 3,99E-88   | TRUE |
| Rv2516c | 1833 | 351 | 2,38466385   | 1,89452441   | 26,5130766   | 6,85E-155 | 4,31E-153  | 1,05E-153  | TRUE |
| Rv2517c | 1745 | 291 | 2,584135978  | 2,093996538  | 27,61813468  | 6,74E-168 | 5,16E-166  | 1,26E-166  | TRUE |
| Rv2518c | 133  | 378 | -1,506959989 | -1,997099429 | -14,76657177 | 2,41E-49  | 4,07E-48   | 9,94E-49   | TRUE |
| Rv2519  | 252  | 51  | 2,304854582  | 1,814715141  | 9,539773947  | 1,43E-21  | 1,12E-20   | 2,73E-21   | TRUE |
| Rv2522c | 27   | 74  | -1,454565863 | -1,944705304 | -6,418805138 | 1,37E-10  | 6,12E-10   | 1,49E-10   | TRUE |

|         |      |      |              |              |              |          |            |            |      |
|---------|------|------|--------------|--------------|--------------|----------|------------|------------|------|
| Rv2523c | 1    | 11   | -3,459431619 | -3,949571059 | -3,550816934 | 0,000384 | 0,0009136  | 0,00022317 | TRUE |
| Rv2524c | 401  | 392  | 0,032748582  | -0,457390858 | -4,498089819 | 6,86E-06 | 2,01E-05   | 4,92E-06   | TRUE |
| Rv2525c | 53   | 6    | 3,142957954  | 2,652818514  | 5,53034195   | 3,20E-08 | 1,19E-07   | 2,90E-08   | TRUE |
| Rv2527  | 34   | 7    | 2,280107919  | 1,789968479  | 3,470771699  | 0,000519 | 0,00120485 | 0,00029441 | TRUE |
| Rv2530A | 72   | 12   | 2,584962501  | 2,094823061  | 5,606856099  | 2,06E-08 | 7,77E-08   | 1,90E-08   | TRUE |
| Rv2533c | 49   | 75   | -0,614108846 | -1,104248286 | -4,244639435 | 2,19E-05 | 6,08E-05   | 1,48E-05   | TRUE |
| Rv2534c | 91   | 28   | 1,700439718  | 1,210300278  | 4,245193509  | 2,18E-05 | 6,07E-05   | 1,48E-05   | TRUE |
| Rv2536  | 55   | 373  | -2,761672107 | -3,251811547 | -19,21523043 | 2,76E-82 | 7,87E-81   | 1,92E-81   | TRUE |
| Rv2542  | 13   | 0    | 4,700439718  | 4,210300278  | 3,318724439  | 0,000904 | 0,00199507 | 0,00048723 | TRUE |
| Rv2549c | 52   | 6    | 3,115477217  | 2,625337777  | 5,447050664  | 5,12E-08 | 1,88E-07   | 4,59E-08   | TRUE |
| Rv2550c | 87   | 9    | 3,273018494  | 2,782879054  | 7,267376708  | 3,67E-13 | 1,89E-12   | 4,62E-13   | TRUE |
| Rv2555c | 2901 | 1752 | 0,727547521  | 0,237408081  | 5,579691736  | 2,41E-08 | 9,03E-08   | 2,21E-08   | TRUE |
| Rv2556c | 97   | 32   | 1,599912842  | 1,109773402  | 4,089516296  | 4,32E-05 | 0,00011602 | 2,83E-05   | TRUE |
| Rv2559c | 11   | 41   | -1,898120386 | -2,388259826 | -5,433318073 | 5,53E-08 | 2,02E-07   | 4,95E-08   | TRUE |
| Rv2560  | 29   | 4    | 2,857980995  | 2,367841555  | 3,836199272  | 0,000125 | 0,00031695 | 7,74E-05   | TRUE |
| Rv2565  | 35   | 52   | -0,571156701 | -1,061296141 | -3,422196189 | 0,000621 | 0,00142186 | 0,00034744 | TRUE |
| Rv2568c | 20   | 1    | 4,321928095  | 3,831788655  | 4,000274753  | 6,33E-05 | 0,00016593 | 4,05E-05   | TRUE |
| Rv2570  | 22   | 1    | 4,459431619  | 3,969292179  | 4,243748384  | 2,20E-05 | 6,09E-05   | 1,49E-05   | TRUE |
| Rv2574  | 43   | 8    | 2,426264755  | 1,936125315  | 4,116338757  | 3,85E-05 | 0,0001037  | 2,53E-05   | TRUE |
| Rv2575  | 42   | 72   | -0,777607579 | -1,267747019 | -4,641249067 | 3,46E-06 | 1,06E-05   | 2,60E-06   | TRUE |
| Rv2580c | 20   | 66   | -1,722466024 | -2,212605465 | -6,584073493 | 4,58E-11 | 2,09E-10   | 5,11E-11   | TRUE |
| Rv2583c | 566  | 551  | 0,038749734  | -0,451389706 | -5,269389721 | 1,37E-07 | 4,85E-07   | 1,19E-07   | TRUE |
| Rv2584c | 95   | 195  | -1,037474705 | -1,527614145 | -8,799376452 | 1,38E-18 | 9,49E-18   | 2,32E-18   | TRUE |
| Rv2586c | 34   | 102  | -1,584962501 | -2,075101941 | -7,861728653 | 3,79E-15 | 2,21E-14   | 5,40E-15   | TRUE |
| Rv2591  | 34   | 5    | 2,765534746  | 2,275395306  | 4,056059164  | 4,99E-05 | 0,00013258 | 3,24E-05   | TRUE |
| Rv2594c | 33   | 1    | 5,044394119  | 4,554254679  | 5,388615916  | 7,10E-08 | 2,57E-07   | 6,29E-08   | TRUE |
| Rv2596  | 20   | 2    | 3,321928095  | 2,831788655  | 3,515665651  | 0,000439 | 0,00103034 | 0,00025169 | TRUE |
| Rv2601  | 10   | 34   | -1,765534746 | -2,255674186 | -4,781719288 | 1,74E-06 | 5,56E-06   | 1,36E-06   | TRUE |
| Rv2601A | 84   | 26   | 1,691877705  | 1,201738265  | 4,055791489  | 5,00E-05 | 0,00013259 | 3,24E-05   | TRUE |
| Rv2607  | 31   | 5    | 2,632268215  | 2,142128775  | 3,731327674  | 0,00019  | 0,0004718  | 0,00011525 | TRUE |
| Rv2609c | 11   | 49   | -2,155278225 | -2,645417666 | -6,292625456 | 3,12E-10 | 1,36E-09   | 3,32E-10   | TRUE |
| Rv2613c | 55   | 4    | 3,781359714  | 3,291220273  | 6,25746945   | 3,91E-10 | 1,70E-09   | 4,15E-10   | TRUE |
| Rv2614c | 135  | 167  | -0,306888695 | -0,797028135 | -4,822165702 | 1,42E-06 | 4,59E-06   | 1,12E-06   | TRUE |
| Rv2615c | 59   | 10   | 2,560714954  | 2,070575514  | 5,037848148  | 4,71E-07 | 1,58E-06   | 3,86E-07   | TRUE |
| Rv2617c | 355  | 6    | 5,886712714  | 5,396573274  | 18,09944469  | 3,22E-73 | 8,11E-72   | 1,98E-72   | TRUE |
| Rv2619c | 31   | 6    | 2,36923381   | 1,87909437   | 3,425802561  | 0,000613 | 0,00140476 | 0,00034326 | TRUE |
| Rv2620c | 84   | 114  | -0,440572591 | -0,930712031 | -4,545590447 | 5,48E-06 | 1,63E-05   | 3,98E-06   | TRUE |

|         |     |      |              |              |              |           |            |            |      |
|---------|-----|------|--------------|--------------|--------------|-----------|------------|------------|------|
| Rv2621c | 203 | 49   | 2,050626073  | 1,560486633  | 7,694191515  | 1,42E-14  | 7,98E-14   | 1,95E-14   | TRUE |
| Rv2622  | 53  | 175  | -1,723290657 | -2,213430097 | -10,72438588 | 7,82E-27  | 7,47E-26   | 1,82E-26   | TRUE |
| Rv2623  | 240 | 1312 | -2,450661409 | -2,940800849 | -34,41279413 | 1,62E-259 | 2,64E-257  | 6,45E-258  | TRUE |
| Rv2624c | 76  | 154  | -1,018859027 | -1,508998467 | -7,749196002 | 9,25E-15  | 5,24E-14   | 1,28E-14   | TRUE |
| Rv2625c | 65  | 296  | -2,187085553 | -2,677224993 | -15,56811935 | 1,20E-54  | 2,21E-53   | 5,40E-54   | TRUE |
| Rv2626c | 41  | 167  | -2,026152288 | -2,516291728 | -11,30074873 | 1,30E-29  | 1,35E-28   | 3,29E-29   | TRUE |
| Rv2627c | 90  | 714  | -2,987927168 | -3,478066608 | -27,34527626 | 1,23E-164 | 8,73E-163  | 2,13E-163  | TRUE |
| Rv2628  | 57  | 538  | -3,238572348 | -3,728711788 | -24,36362448 | 4,16E-131 | 2,08E-129  | 5,09E-130  | TRUE |
| Rv2629  | 393 | 1132 | -1,526272741 | -2,016412181 | -25,72834059 | 5,63E-146 | 3,24E-144  | 7,91E-145  | TRUE |
| Rv2631  | 96  | 150  | -0,64385619  | -1,13399563  | -6,133274008 | 8,61E-10  | 3,64E-09   | 8,89E-10   | TRUE |
| Rv2632c | 109 | 134  | -0,297904866 | -0,788044306 | -4,277344836 | 1,89E-05  | 5,29E-05   | 1,29E-05   | TRUE |
| Rv2638  | 62  | 7    | 3,146841388  | 2,656701948  | 5,986244891  | 2,15E-09  | 8,81E-09   | 2,15E-09   | TRUE |
| Rv2639c | 153 | 53   | 1,529467388  | 1,039327948  | 4,869331534  | 1,12E-06  | 3,65E-06   | 8,92E-07   | TRUE |
| Rv2640c | 82  | 19   | 2,109624491  | 1,619485051  | 5,023051521  | 5,09E-07  | 1,70E-06   | 4,17E-07   | TRUE |
| Rv2641  | 206 | 23   | 3,162938571  | 2,672799131  | 10,94785548  | 6,80E-28  | 6,71E-27   | 1,64E-27   | TRUE |
| Rv2642  | 99  | 506  | -2,353636955 | -2,843776395 | -21,00805271 | 5,54E-98  | 1,88E-96   | 4,59E-97   | TRUE |
| Rv2643  | 755 | 176  | 2,100901216  | 1,610761776  | 15,18842576  | 4,22E-52  | 7,49E-51   | 1,83E-51   | TRUE |
| Rv2645  | 19  | 2    | 3,247927513  | 2,757788073  | 3,380169168  | 0,000724  | 0,00164085 | 0,00040095 | TRUE |
| Rv2649  | 8   | 65   | -3,022367813 | -3,512507253 | -8,280533049 | 1,23E-16  | 7,58E-16   | 1,85E-16   | TRUE |
| Rv2650c | 199 | 418  | -1,070734512 | -1,560873952 | -13,09038536 | 3,74E-39  | 5,03E-38   | 1,23E-38   | TRUE |
| Rv2651c | 257 | 339  | -0,399516914 | -0,889656354 | -7,548075482 | 4,42E-14  | 2,39E-13   | 5,83E-14   | TRUE |
| Rv2656c | 32  | 58   | -0,857980995 | -1,348120435 | -4,368414827 | 1,25E-05  | 3,57E-05   | 8,72E-06   | TRUE |
| Rv2657c | 59  | 98   | -0,732066795 | -1,222206235 | -5,261768102 | 1,43E-07  | 5,05E-07   | 1,23E-07   | TRUE |
| Rv2658c | 34  | 3    | 3,502500341  | 3,0123609    | 4,725967407  | 2,29E-06  | 7,21E-06   | 1,76E-06   | TRUE |
| Rv2659c | 290 | 7    | 5,372554168  | 4,882414728  | 16,17932438  | 7,06E-59  | 1,37E-57   | 3,35E-58   | TRUE |
| Rv2660c | 0   | 17   | -5,087462841 | -5,577602281 | -4,701454602 | 2,58E-06  | 8,08E-06   | 1,98E-06   | TRUE |
| Rv2661c | 2   | 18   | -3,169925001 | -3,660064441 | -4,425842147 | 9,61E-06  | 2,78E-05   | 6,80E-06   | TRUE |
| Rv2662  | 202 | 7    | 4,850856561  | 4,360717121  | 13,20134344  | 8,62E-40  | 1,18E-38   | 2,88E-39   | TRUE |
| Rv2663  | 141 | 16   | 3,139551352  | 2,649411912  | 9,014408272  | 1,98E-19  | 1,41E-18   | 3,45E-19   | TRUE |
| Rv2669  | 58  | 7    | 3,050626073  | 2,560486633  | 5,674046384  | 1,39E-08  | 5,34E-08   | 1,31E-08   | TRUE |
| Rv2670c | 15  | 76   | -2,341036918 | -2,831176358 | -8,121551787 | 4,60E-16  | 2,79E-15   | 6,81E-16   | TRUE |
| Rv2671  | 58  | 4    | 3,857980995  | 3,367841555  | 6,488734009  | 8,66E-11  | 3,91E-10   | 9,56E-11   | TRUE |
| Rv2672  | 72  | 159  | -1,142957954 | -1,633097394 | -8,340232278 | 7,41E-17  | 4,64E-16   | 1,13E-16   | TRUE |
| Rv2678c | 19  | 75   | -1,980891177 | -2,471030617 | -7,495140531 | 6,62E-14  | 3,56E-13   | 8,70E-14   | TRUE |
| Rv2681  | 53  | 10   | 2,40599236   | 1,91585292   | 4,538072965  | 5,68E-06  | 1,68E-05   | 4,11E-06   | TRUE |
| Rv2687c | 80  | 10   | 3            | 2,50986056   | 6,589692463  | 4,41E-11  | 2,02E-10   | 4,94E-11   | TRUE |
| Rv2689c | 23  | 46   | -1           | -1,49013944  | -4,195595109 | 2,72E-05  | 7,50E-05   | 1,83E-05   | TRUE |

|         |      |      |              |              |              |           |            |            |      |
|---------|------|------|--------------|--------------|--------------|-----------|------------|------------|------|
| Rv2691  | 41   | 155  | -1,918572401 | -2,408711841 | -10,61777018 | 2,46E-26  | 2,32E-25   | 5,66E-26   | TRUE |
| Rv2692  | 46   | 134  | -1,542527234 | -2,032666674 | -8,892027283 | 6,00E-19  | 4,21E-18   | 1,03E-18   | TRUE |
| Rv2693c | 430  | 85   | 2,338801913  | 1,848662473  | 12,6213717   | 1,61E-36  | 1,97E-35   | 4,82E-36   | TRUE |
| Rv2694c | 1518 | 85   | 4,158565139  | 3,668425699  | 34,33730442  | 2,18E-258 | 3,40E-256  | 8,32E-257  | TRUE |
| Rv2696c | 502  | 1264 | -1,332237194 | -1,822376634 | -25,41502259 | 1,72E-142 | 9,60E-141  | 2,35E-141  | TRUE |
| Rv2697c | 110  | 411  | -1,90163487  | -2,39177431  | -17,22134135 | 1,84E-66  | 4,17E-65   | 1,02E-65   | TRUE |
| Rv2698  | 16   | 71   | -2,14974712  | -2,63988656  | -7,566163105 | 3,84E-14  | 2,09E-13   | 5,10E-14   | TRUE |
| Rv2699c | 260  | 329  | -0,339575961 | -0,829715401 | -7,007301706 | 2,43E-12  | 1,19E-11   | 2,91E-12   | TRUE |
| Rv2703  | 371  | 640  | -0,786652718 | -1,276792158 | -13,92158199 | 4,68E-44  | 7,17E-43   | 1,75E-43   | TRUE |
| Rv2705c | 36   | 3    | 3,584962501  | 3,094823061  | 4,925219514  | 8,43E-07  | 2,78E-06   | 6,78E-07   | TRUE |
| Rv2707  | 1640 | 885  | 0,889946455  | 0,399807014  | 6,860374968  | 6,87E-12  | 3,31E-11   | 8,08E-12   | TRUE |
| Rv2710  | 2816 | 742  | 1,924156242  | 1,434016802  | 26,96116159  | 4,22E-160 | 2,84E-158  | 6,94E-159  | TRUE |
| Rv2711  | 1235 | 609  | 1,019996909  | 0,529857469  | 7,71092193   | 1,25E-14  | 7,01E-14   | 1,71E-14   | TRUE |
| Rv2712c | 18   | 53   | -1,557995453 | -2,048134893 | -5,619401311 | 1,92E-08  | 7,27E-08   | 1,78E-08   | TRUE |
| Rv2713  | 232  | 439  | -0,920096134 | -1,410235574 | -12,44150468 | 1,56E-35  | 1,84E-34   | 4,48E-35   | TRUE |
| Rv2714  | 185  | 59   | 1,648738411  | 1,158598971  | 5,846842948  | 5,01E-09  | 2,00E-08   | 4,90E-09   | TRUE |
| Rv2717c | 66   | 118  | -0,83824893  | -1,32838837  | -6,161061384 | 7,23E-10  | 3,08E-09   | 7,54E-10   | TRUE |
| Rv2718c | 36   | 116  | -1,688055994 | -2,178195434 | -8,644676857 | 5,40E-18  | 3,62E-17   | 8,85E-18   | TRUE |
| Rv2721c | 61   | 295  | -2,273833807 | -2,763973247 | -15,80590832 | 2,83E-56  | 5,37E-55   | 1,31E-55   | TRUE |
| Rv2722  | 20   | 118  | -2,560714954 | -3,050854395 | -10,49791387 | 8,83E-26  | 8,02E-25   | 1,96E-25   | TRUE |
| Rv2723  | 28   | 123  | -2,135159583 | -2,625299023 | -9,928949429 | 3,12E-23  | 2,64E-22   | 6,46E-23   | TRUE |
| Rv2724c | 66   | 105  | -0,669851398 | -1,159990838 | -5,225276453 | 1,74E-07  | 6,12E-07   | 1,49E-07   | TRUE |
| Rv2728c | 42   | 6    | 2,807354922  | 2,317215482  | 4,557778468  | 5,17E-06  | 1,54E-05   | 3,77E-06   | TRUE |
| Rv2731  | 224  | 54   | 2,05246742   | 1,56232798   | 8,089428688  | 5,99E-16  | 3,61E-15   | 8,81E-16   | TRUE |
| Rv2732c | 14   | 40   | -1,514573173 | -2,004712613 | -4,814373753 | 1,48E-06  | 4,76E-06   | 1,16E-06   | TRUE |
| Rv2733c | 10   | 41   | -2,03562391  | -2,52576335  | -5,610835457 | 2,01E-08  | 7,60E-08   | 1,86E-08   | TRUE |
| Rv2734  | 61   | 6    | 3,345774837  | 2,855635397  | 6,166111351  | 7,00E-10  | 2,99E-09   | 7,31E-10   | TRUE |
| Rv2741  | 14   | 43   | -1,618909833 | -2,109049273 | -5,157354346 | 2,50E-07  | 8,67E-07   | 2,12E-07   | TRUE |
| Rv2742c | 81   | 12   | 2,754887502  | 2,264748062  | 6,242822842  | 4,30E-10  | 1,86E-09   | 4,54E-10   | TRUE |
| Rv2743c | 296  | 63   | 2,232173442  | 1,742034002  | 10,0511001   | 9,08E-24  | 7,83E-23   | 1,91E-23   | TRUE |
| Rv2744c | 2113 | 356  | 2,569343621  | 2,079204181  | 30,25942914  | 3,92E-201 | 4,03E-199  | 9,85E-200  | TRUE |
| Rv2745c | 1214 | 304  | 1,997625193  | 1,507485753  | 18,35558697  | 2,98E-75  | 7,70E-74   | 1,88E-74   | TRUE |
| Rv2746c | 18   | 1    | 4,169925001  | 3,679785561  | 3,741720075  | 0,000183  | 0,00045386 | 0,00011073 | TRUE |
| Rv2748c | 80   | 16   | 2,321928095  | 1,831788655  | 5,409097101  | 6,33E-08  | 2,30E-07   | 5,63E-08   | TRUE |
| Rv2749  | 27   | 94   | -1,79970135  | -2,28984079  | -8,023847079 | 1,02E-15  | 6,09E-15   | 1,49E-15   | TRUE |
| Rv2750  | 24   | 66   | -1,459431619 | -1,949571059 | -6,07193143  | 1,26E-09  | 5,26E-09   | 1,28E-09   | TRUE |
| Rv2753c | 79   | 142  | -0,845966371 | -1,336105811 | -6,788953119 | 1,13E-11  | 5,36E-11   | 1,31E-11   | TRUE |

|         |      |      |              |              |              |           |            |            |      |
|---------|------|------|--------------|--------------|--------------|-----------|------------|------------|------|
| Rv2760c | 2    | 12   | -2,584962501 | -3,075101941 | -3,3600313   | 0,000779  | 0,00175205 | 0,00042788 | TRUE |
| Rv2764c | 198  | 216  | -0,125530882 | -0,615670322 | -4,371828351 | 1,23E-05  | 3,52E-05   | 8,60E-06   | TRUE |
| Rv2768c | 57   | 12   | 2,247927513  | 1,757788073  | 4,437848742  | 9,09E-06  | 2,64E-05   | 6,45E-06   | TRUE |
| Rv2773c | 30   | 63   | -1,070389328 | -1,560528768 | -5,079700658 | 3,78E-07  | 1,28E-06   | 3,13E-07   | TRUE |
| Rv2774c | 27   | 47   | -0,79970135  | -1,28984079  | -3,800566652 | 0,000144  | 0,00036371 | 8,89E-05   | TRUE |
| Rv2778c | 79   | 97   | -0,296132094 | -0,786271534 | -3,632000318 | 0,000281  | 0,00068425 | 0,0001672  | TRUE |
| Rv2780  | 4182 | 1345 | 1,636586889  | 1,146447449  | 27,63985525  | 3,70E-168 | 2,89E-166  | 7,05E-167  | TRUE |
| Rv2781c | 69   | 85   | -0,300866479 | -0,791005919 | -3,417548647 | 0,000632  | 0,00144466 | 0,00035301 | TRUE |
| Rv2783c | 273  | 748  | -1,454137319 | -1,944276759 | -20,41436084 | 1,25E-92  | 4,02E-91   | 9,83E-92   | TRUE |
| Rv2784c | 83   | 158  | -0,928741317 | -1,418880757 | -7,496649883 | 6,55E-14  | 3,53E-13   | 8,62E-14   | TRUE |
| Rv2785c | 174  | 284  | -0,706803624 | -1,196943064 | -8,812183475 | 1,23E-18  | 8,48E-18   | 2,07E-18   | TRUE |
| Rv2788  | 83   | 111  | -0,419376435 | -0,909515875 | -4,399350123 | 1,09E-05  | 3,12E-05   | 7,63E-06   | TRUE |
| Rv2789c | 25   | 44   | -0,815575429 | -1,305714869 | -3,712291704 | 0,000205  | 0,00050667 | 0,00012381 | TRUE |
| Rv2790c | 29   | 46   | -0,665580961 | -1,155720401 | -3,448172966 | 0,000564  | 0,0012995  | 0,00031754 | TRUE |
| Rv2791c | 1938 | 1823 | 0,088254009  | -0,401885431 | -8,620597413 | 6,66E-18  | 4,43E-17   | 1,08E-17   | TRUE |
| Rv2793c | 151  | 248  | -0,715791571 | -1,205931011 | -8,283386217 | 1,20E-16  | 7,41E-16   | 1,81E-16   | TRUE |
| Rv2794c | 29   | 239  | -3,042885813 | -3,533025253 | -15,91538409 | 4,96E-57  | 9,49E-56   | 2,32E-56   | TRUE |
| Rv2795c | 19   | 87   | -2,195015982 | -2,685155422 | -8,452536978 | 2,85E-17  | 1,83E-16   | 4,47E-17   | TRUE |
| Rv2800  | 29   | 101  | -1,800230488 | -2,290369928 | -8,318439398 | 8,91E-17  | 5,56E-16   | 1,36E-16   | TRUE |
| Rv2801A | 31   | 4    | 2,95419631   | 2,46405687   | 4,05919916   | 4,92E-05  | 0,00013103 | 3,20E-05   | TRUE |
| Rv2808  | 20   | 67   | -1,744161096 | -2,234300536 | -6,67367629  | 2,49E-11  | 1,17E-10   | 2,85E-11   | TRUE |
| Rv2809  | 22   | 2    | 3,459431619  | 2,969292179  | 3,775269792  | 0,00016   | 0,00040113 | 9,79E-05   | TRUE |
| Rv2816c | 4    | 76   | -4,247927513 | -4,738066953 | -9,766906948 | 1,56E-22  | 1,27E-21   | 3,11E-22   | TRUE |
| Rv2818c | 13   | 35   | -1,428843299 | -1,918982739 | -4,37535592  | 1,21E-05  | 3,47E-05   | 8,47E-06   | TRUE |
| Rv2819c | 29   | 123  | -2,08453351  | -2,57467295  | -9,823293486 | 8,94E-23  | 7,39E-22   | 1,81E-22   | TRUE |
| Rv2823c | 47   | 6    | 2,969626351  | 2,479486911  | 5,016042718  | 5,27E-07  | 1,76E-06   | 4,31E-07   | TRUE |
| Rv2827c | 163  | 23   | 2,825166198  | 2,335026758  | 9,0205033    | 1,87E-19  | 1,34E-18   | 3,27E-19   | TRUE |
| Rv2830c | 87   | 7    | 3,635588574  | 3,145449134  | 7,713974263  | 1,22E-14  | 6,86E-14   | 1,68E-14   | TRUE |
| Rv2833c | 11   | 25   | -1,184424571 | -1,674564011 | -3,36644829  | 0,000761  | 0,00171971 | 0,00042022 | TRUE |
| Rv2836c | 86   | 27   | 1,671377253  | 1,181237812  | 4,04814645   | 5,16E-05  | 0,00013686 | 3,34E-05   | TRUE |
| Rv2837c | 246  | 66   | 1,898120386  | 1,407980946  | 7,847127876  | 4,26E-15  | 2,47E-14   | 6,04E-15   | TRUE |
| Rv2838c | 310  | 102  | 1,603699063  | 1,113559623  | 7,332028337  | 2,27E-13  | 1,18E-12   | 2,89E-13   | TRUE |
| Rv2839c | 2009 | 540  | 1,895446252  | 1,405306812  | 22,41717401  | 2,68E-111 | 1,06E-109  | 2,58E-110  | TRUE |
| Rv2840c | 107  | 118  | -0,141176063 | -0,631315503 | -3,304070655 | 0,000953  | 0,00209288 | 0,00051141 | TRUE |
| Rv2841c | 147  | 46   | 1,676110389  | 1,185970949  | 5,309623459  | 1,10E-07  | 3,92E-07   | 9,58E-08   | TRUE |
| Rv2842c | 277  | 48   | 2,528779665  | 2,038640225  | 10,80833468  | 3,14E-27  | 3,06E-26   | 7,48E-27   | TRUE |
| Rv2845c | 44   | 156  | -1,8259706   | -2,31611004  | -10,40817792 | 2,28E-25  | 2,04E-24   | 4,98E-25   | TRUE |

|         |      |      |              |              |              |           |            |            |      |
|---------|------|------|--------------|--------------|--------------|-----------|------------|------------|------|
| Rv2846c | 244  | 441  | -0,853897508 | -1,344036948 | -12,02170364 | 2,73E-33  | 3,02E-32   | 7,39E-33   | TRUE |
| Rv2847c | 56   | 122  | -1,123382416 | -1,613521856 | -7,242406828 | 4,41E-13  | 2,26E-12   | 5,53E-13   | TRUE |
| Rv2849c | 74   | 10   | 2,887525271  | 2,397385831  | 6,172887504  | 6,71E-10  | 2,87E-09   | 7,02E-10   | TRUE |
| Rv2850c | 33   | 51   | -0,628031223 | -1,118170663 | -3,535727198 | 0,000407  | 0,00096183 | 0,00023503 | TRUE |
| Rv2856  | 21   | 67   | -1,673771768 | -2,163911208 | -6,54275676  | 6,04E-11  | 2,74E-10   | 6,70E-11   | TRUE |
| Rv2857c | 14   | 78   | -2,478047297 | -2,968186737 | -8,423496335 | 3,65E-17  | 2,33E-16   | 5,69E-17   | TRUE |
| Rv2864c | 25   | 4    | 2,64385619   | 2,15371675   | 3,362189686  | 0,000773  | 0,00174293 | 0,00042553 | TRUE |
| Rv2865  | 118  | 33   | 1,83824893   | 1,34810949   | 5,257566876  | 1,46E-07  | 5,16E-07   | 1,26E-07   | TRUE |
| Rv2866  | 20   | 0    | 5,321928095  | 4,831788655  | 4,241681249  | 2,22E-05  | 6,14E-05   | 1,50E-05   | TRUE |
| Rv2867c | 181  | 65   | 1,477478074  | 0,987338634  | 5,076899051  | 3,84E-07  | 1,30E-06   | 3,18E-07   | TRUE |
| Rv2868c | 3291 | 3837 | -0,221452738 | -0,711592179 | -21,02954843 | 3,52E-98  | 1,22E-96   | 2,97E-97   | TRUE |
| Rv2869c | 149  | 531  | -1,83339953  | -2,32353897  | -19,2439286  | 1,59E-82  | 4,59E-81   | 1,12E-81   | TRUE |
| Rv2872  | 2    | 74   | -5,209453366 | -5,699592806 | -9,813953621 | 9,80E-23  | 8,09E-22   | 1,98E-22   | TRUE |
| Rv2874  | 62   | 85   | -0,455194626 | -0,945334066 | -3,976526422 | 6,99E-05  | 0,0001829  | 4,47E-05   | TRUE |
| Rv2875  | 27   | 71   | -1,394859617 | -1,884999057 | -6,157688501 | 7,38E-10  | 3,14E-09   | 7,67E-10   | TRUE |
| Rv2876  | 12   | 61   | -2,345774837 | -2,835914277 | -7,282211555 | 3,28E-13  | 1,70E-12   | 4,16E-13   | TRUE |
| Rv2877c | 62   | 221  | -1,833706249 | -2,323845689 | -12,4134392  | 2,21E-35  | 2,59E-34   | 6,33E-35   | TRUE |
| Rv2878c | 91   | 119  | -0,387023123 | -0,877162563 | -4,41783324  | 9,97E-06  | 2,88E-05   | 7,04E-06   | TRUE |
| Rv2883c | 34   | 128  | -1,912537159 | -2,402676599 | -9,634518906 | 5,72E-22  | 4,51E-21   | 1,10E-21   | TRUE |
| Rv2885c | 41   | 164  | -2           | -2,49013944  | -11,13272176 | 8,69E-29  | 8,82E-28   | 2,15E-28   | TRUE |
| Rv2887  | 27   | 53   | -0,973032952 | -1,463172392 | -4,442765442 | 8,88E-06  | 2,59E-05   | 6,32E-06   | TRUE |
| Rv2888c | 67   | 98   | -0,548620654 | -1,038760094 | -4,61647766  | 3,90E-06  | 1,19E-05   | 2,91E-06   | TRUE |
| Rv2889c | 63   | 190  | -1,592575685 | -2,082715125 | -10,75569078 | 5,57E-27  | 5,35E-26   | 1,31E-26   | TRUE |
| Rv2890c | 43   | 188  | -2,128324097 | -2,618463537 | -12,25823518 | 1,52E-34  | 1,75E-33   | 4,27E-34   | TRUE |
| Rv2895c | 95   | 118  | -0,312787441 | -0,802926881 | -4,079063624 | 4,52E-05  | 0,00012111 | 2,96E-05   | TRUE |
| Rv2897c | 21   | 61   | -1,538419915 | -2,028559355 | -5,991311908 | 2,08E-09  | 8,56E-09   | 2,09E-09   | TRUE |
| Rv2900c | 235  | 96   | 1,291554446  | 0,801415006  | 4,84951366   | 1,24E-06  | 4,02E-06   | 9,83E-07   | TRUE |
| Rv2903c | 121  | 26   | 2,218423519  | 1,728284079  | 6,390166964  | 1,66E-10  | 7,32E-10   | 1,79E-10   | TRUE |
| Rv2904c | 179  | 204  | -0,188609565 | -0,678749005 | -4,632943946 | 3,61E-06  | 1,10E-05   | 2,70E-06   | TRUE |
| Rv2906c | 92   | 22   | 2,064130337  | 1,573990897  | 5,212025298  | 1,87E-07  | 6,53E-07   | 1,60E-07   | TRUE |
| Rv2907c | 79   | 96   | -0,281181753 | -0,771321193 | -3,553720196 | 0,00038   | 0,0009055  | 0,00022126 | TRUE |
| Rv2908c | 37   | 4    | 3,209453366  | 2,719313926  | 4,682303045  | 2,84E-06  | 8,82E-06   | 2,16E-06   | TRUE |
| Rv2909c | 72   | 8    | 3,169925001  | 2,679785561  | 6,481066983  | 9,11E-11  | 4,11E-10   | 1,00E-10   | TRUE |
| Rv2910c | 125  | 36   | 1,795859283  | 1,305719843  | 5,279784534  | 1,29E-07  | 4,60E-07   | 1,12E-07   | TRUE |
| Rv2912c | 1107 | 9    | 6,942514505  | 6,452375065  | 31,82710141  | 2,73E-222 | 3,23E-220  | 7,90E-221  | TRUE |
| Rv2913c | 5281 | 56   | 6,559240504  | 6,069101064  | 69,91325517  | 0         | 0          | 0          | TRUE |
| Rv2914c | 62   | 9    | 2,784271309  | 2,294131869  | 5,504496236  | 3,70E-08  | 1,37E-07   | 3,35E-08   | TRUE |



|         |      |      |              |              |              |           |            |            |      |
|---------|------|------|--------------|--------------|--------------|-----------|------------|------------|------|
| Rv2916c | 123  | 332  | -1,432524926 | -1,922664366 | -13,49574879 | 1,66E-41  | 2,40E-40   | 5,85E-41   | TRUE |
| Rv2917  | 15   | 46   | -1,61667136  | -2,1068108   | -5,33064578  | 9,79E-08  | 3,51E-07   | 8,58E-08   | TRUE |
| Rv2919c | 220  | 256  | -0,218640286 | -0,708779727 | -5,391726333 | 6,98E-08  | 2,53E-07   | 6,19E-08   | TRUE |
| Rv2920c | 117  | 150  | -0,358453971 | -0,848593411 | -4,822427812 | 1,42E-06  | 4,58E-06   | 1,12E-06   | TRUE |
| Rv2922c | 53   | 73   | -0,461904104 | -0,952043544 | -3,706952698 | 0,00021   | 0,00051648 | 0,00012621 | TRUE |
| Rv2923c | 32   | 5    | 2,678071905  | 2,187932465  | 3,841482865  | 0,000122  | 0,00031111 | 7,60E-05   | TRUE |
| Rv2927c | 148  | 16   | 3,209453366  | 2,719313926  | 9,365011981  | 7,60E-21  | 5,80E-20   | 1,42E-20   | TRUE |
| Rv2930  | 357  | 162  | 1,139930261  | 0,649790821  | 4,975903019  | 6,49E-07  | 2,16E-06   | 5,29E-07   | TRUE |
| Rv2931  | 206  | 714  | -1,793279737 | -2,283419177 | -22,08530221 | 4,38E-108 | 1,63E-106  | 3,98E-107  | TRUE |
| Rv2933  | 88   | 197  | -1,162620201 | -1,652759641 | -9,36360976  | 7,71E-21  | 5,87E-20   | 1,43E-20   | TRUE |
| Rv2934  | 37   | 56   | -0,597901556 | -1,088040996 | -3,624053851 | 0,00029   | 0,000703   | 0,00017178 | TRUE |
| Rv2935  | 538  | 183  | 1,555762524  | 1,065623084  | 9,321854261  | 1,14E-20  | 8,60E-20   | 2,10E-20   | TRUE |
| Rv2940c | 2437 | 1536 | 0,665928035  | 0,175788595  | 3,825876346  | 0,00013   | 0,00032978 | 8,06E-05   | TRUE |
| Rv2941  | 360  | 586  | -0,702903758 | -1,193043198 | -12,62907863 | 1,46E-36  | 1,80E-35   | 4,39E-36   | TRUE |
| Rv2946c | 96   | 211  | -1,136136688 | -1,626276128 | -9,579317966 | 9,77E-22  | 7,64E-21   | 1,87E-21   | TRUE |
| Rv2947c | 106  | 205  | -0,951559645 | -1,441699085 | -8,642592946 | 5,50E-18  | 3,68E-17   | 8,99E-18   | TRUE |
| Rv2958c | 37   | 3    | 3,624490865  | 3,134351425  | 5,022411989  | 5,10E-07  | 1,71E-06   | 4,18E-07   | TRUE |
| Rv2962c | 165  | 66   | 1,321928095  | 0,831788655  | 4,195195997  | 2,73E-05  | 7,50E-05   | 1,83E-05   | TRUE |
| Rv2963  | 159  | 44   | 1,853451337  | 1,363311897  | 6,15572604   | 7,47E-10  | 3,17E-09   | 7,75E-10   | TRUE |
| Rv2964  | 46   | 6    | 2,938599455  | 2,448460015  | 4,926713676  | 8,36E-07  | 2,76E-06   | 6,74E-07   | TRUE |
| Rv2967c | 92   | 35   | 1,394278939  | 0,904139499  | 3,362460147  | 0,000773  | 0,00174374 | 0,00042553 | TRUE |
| Rv2986c | 122  | 42   | 1,538419915  | 1,048280475  | 4,378699736  | 1,19E-05  | 3,42E-05   | 8,36E-06   | TRUE |
| Rv2987c | 219  | 7    | 4,967432138  | 4,477292698  | 13,83087599  | 1,66E-43  | 2,52E-42   | 6,16E-43   | TRUE |
| Rv2988c | 282  | 33   | 3,095157233  | 2,605017793  | 12,63222     | 1,40E-36  | 1,73E-35   | 4,24E-36   | TRUE |
| Rv2989  | 43   | 10   | 2,10433666   | 1,61419722   | 3,628798656  | 0,000285  | 0,00069171 | 0,00016897 | TRUE |
| Rv2990c | 262  | 126  | 1,056143078  | 0,566003638  | 3,767119286  | 0,000165  | 0,00041338 | 0,00010101 | TRUE |
| Rv2995c | 50   | 167  | -1,739848103 | -2,229987543 | -10,52445596 | 6,66E-26  | 6,12E-25   | 1,50E-25   | TRUE |
| Rv2996c | 37   | 116  | -1,648527629 | -2,13866707  | -8,546147191 | 1,27E-17  | 8,26E-17   | 2,02E-17   | TRUE |
| Rv2998  | 7    | 57   | -3,025535092 | -3,515674532 | -7,75694402  | 8,70E-15  | 4,95E-14   | 1,21E-14   | TRUE |
| Rv3000  | 5    | 32   | -2,678071905 | -3,168211345 | -5,562616667 | 2,66E-08  | 9,92E-08   | 2,42E-08   | TRUE |
| Rv3001c | 147  | 623  | -2,083416008 | -2,573555448 | -22,10901875 | 2,59E-108 | 9,72E-107  | 2,37E-107  | TRUE |
| Rv3003c | 244  | 578  | -1,244188345 | -1,734327785 | -16,59903447 | 7,08E-62  | 1,48E-60   | 3,61E-61   | TRUE |
| Rv3005c | 39   | 88   | -1,1740294   | -1,66416884  | -6,288439529 | 3,21E-10  | 1,40E-09   | 3,41E-10   | TRUE |
| Rv3007c | 195  | 61   | 1,676592976  | 1,186453536  | 6,117536496  | 9,50E-10  | 3,99E-09   | 9,76E-10   | TRUE |
| Rv3008  | 96   | 22   | 2,125530882  | 1,635391442  | 5,473276265  | 4,42E-08  | 1,62E-07   | 3,97E-08   | TRUE |
| Rv3009c | 152  | 49   | 1,633217669  | 1,143078229  | 5,242746404  | 1,58E-07  | 5,58E-07   | 1,36E-07   | TRUE |
| Rv3010c | 224  | 29   | 2,949373927  | 2,459234487  | 10,90012511  | 1,15E-27  | 1,13E-26   | 2,77E-27   | TRUE |

|         |      |      |              |              |              |           |            |            |      |
|---------|------|------|--------------|--------------|--------------|-----------|------------|------------|------|
| Rv3011c | 8    | 55   | -2,781359714 | -3,271499154 | -7,396891837 | 1,39E-13  | 7,36E-13   | 1,80E-13   | TRUE |
| Rv3015c | 39   | 83   | -1,089637212 | -1,579776653 | -5,882869009 | 4,03E-09  | 1,63E-08   | 3,97E-09   | TRUE |
| Rv3017c | 34   | 119  | -1,807354922 | -2,297494362 | -9,046325266 | 1,48E-19  | 1,06E-18   | 2,59E-19   | TRUE |
| Rv3020c | 19   | 45   | -1,243925583 | -1,734065023 | -4,629141499 | 3,67E-06  | 1,12E-05   | 2,74E-06   | TRUE |
| Rv3022A | 29   | 1    | 4,857980995  | 4,367841555  | 5,003773252  | 5,62E-07  | 1,88E-06   | 4,59E-07   | TRUE |
| Rv3023c | 19   | 52   | -1,452512205 | -1,942651645 | -5,376861451 | 7,58E-08  | 2,74E-07   | 6,69E-08   | TRUE |
| Rv3026c | 8    | 43   | -2,426264755 | -2,916404195 | -6,200480685 | 5,63E-10  | 2,43E-09   | 5,93E-10   | TRUE |
| Rv3027c | 61   | 17   | 1,843274496  | 1,353135056  | 3,790800345  | 0,00015   | 0,00037783 | 9,23E-05   | TRUE |
| Rv3028c | 44   | 90   | -1,032421478 | -1,522560918 | -5,962925712 | 2,48E-09  | 1,02E-08   | 2,48E-09   | TRUE |
| Rv3029c | 79   | 178  | -1,171952683 | -1,662092123 | -8,936274432 | 4,03E-19  | 2,83E-18   | 6,92E-19   | TRUE |
| Rv3032  | 5    | 19   | -1,925999419 | -2,416138859 | -3,723799479 | 0,000196  | 0,00048503 | 0,00011852 | TRUE |
| Rv3034c | 57   | 12   | 2,247927513  | 1,757788073  | 4,437848742  | 9,09E-06  | 2,64E-05   | 6,45E-06   | TRUE |
| Rv3036c | 46   | 9    | 2,353636955  | 1,863497515  | 4,149711128  | 3,33E-05  | 9,03E-05   | 2,21E-05   | TRUE |
| Rv3037c | 42   | 6    | 2,807354922  | 2,317215482  | 4,557778468  | 5,17E-06  | 1,54E-05   | 3,77E-06   | TRUE |
| Rv3038c | 82   | 21   | 1,965234582  | 1,475095142  | 4,691137796  | 2,72E-06  | 8,48E-06   | 2,07E-06   | TRUE |
| Rv3040c | 11   | 70   | -2,669851398 | -3,159990838 | -8,217718959 | 2,07E-16  | 1,28E-15   | 3,13E-16   | TRUE |
| Rv3041c | 64   | 7    | 3,192645078  | 2,702505638  | 6,137980394  | 8,36E-10  | 3,54E-09   | 8,64E-10   | TRUE |
| Rv3043c | 262  | 543  | -1,051385386 | -1,541524826 | -14,78593793 | 1,81E-49  | 3,06E-48   | 7,49E-49   | TRUE |
| Rv3044  | 22   | 97   | -2,140481224 | -2,630620664 | -8,826918662 | 1,08E-18  | 7,48E-18   | 1,83E-18   | TRUE |
| Rv3045  | 111  | 180  | -0,69743723  | -1,18757667  | -6,971270044 | 3,14E-12  | 1,53E-11   | 3,73E-12   | TRUE |
| Rv3046c | 85   | 20   | 2,087462841  | 1,597323401  | 5,063546679  | 4,12E-07  | 1,39E-06   | 3,40E-07   | TRUE |
| Rv3049c | 538  | 252  | 1,094182439  | 0,604042999  | 5,724426736  | 1,04E-08  | 4,04E-08   | 9,87E-09   | TRUE |
| Rv3050c | 240  | 89   | 1,431157165  | 0,941017725  | 5,616968262  | 1,94E-08  | 7,35E-08   | 1,80E-08   | TRUE |
| Rv3051c | 2654 | 1218 | 1,123654237  | 0,633514797  | 13,28928132  | 2,67E-40  | 3,69E-39   | 9,01E-40   | TRUE |
| Rv3052c | 1627 | 1018 | 0,67647669   | 0,18633725   | 3,305039922  | 0,00095   | 0,00208683 | 0,00050993 | TRUE |
| Rv3053c | 489  | 160  | 1,61176256   | 1,12162312   | 9,26353898   | 1,98E-20  | 1,47E-19   | 3,60E-20   | TRUE |
| Rv3054c | 411  | 11   | 5,223562965  | 4,733423525  | 19,16227812  | 7,65E-82  | 2,15E-80   | 5,25E-81   | TRUE |
| Rv3055  | 35   | 3    | 3,544320516  | 3,054181076  | 4,826428313  | 1,39E-06  | 4,50E-06   | 1,10E-06   | TRUE |
| Rv3058c | 92   | 16   | 2,523561956  | 2,033422516  | 6,218030338  | 5,03E-10  | 2,17E-09   | 5,31E-10   | TRUE |
| Rv3059  | 76   | 215  | -1,500265336 | -1,990404776 | -11,11088928 | 1,11E-28  | 1,11E-27   | 2,72E-28   | TRUE |
| Rv3060c | 449  | 77   | 2,543785094  | 2,053645654  | 13,82719725  | 1,75E-43  | 2,64E-42   | 6,46E-43   | TRUE |
| Rv3061c | 1313 | 101  | 3,700439718  | 3,210300278  | 30,25579265  | 4,38E-201 | 4,38E-199  | 1,07E-199  | TRUE |
| Rv3062  | 299  | 91   | 1,716207034  | 1,226067594  | 7,775102314  | 7,54E-15  | 4,32E-14   | 1,05E-14   | TRUE |
| Rv3063  | 109  | 6    | 4,183221824  | 3,693082384  | 9,219876224  | 2,97E-20  | 2,19E-19   | 5,36E-20   | TRUE |
| Rv3068c | 42   | 59   | -0,490325627 | -0,980465067 | -3,415164226 | 0,000637  | 0,00145439 | 0,00035528 | TRUE |
| Rv3072c | 44   | 3    | 3,874469118  | 3,384329678  | 5,663051865  | 1,49E-08  | 5,69E-08   | 1,39E-08   | TRUE |
| Rv3074  | 6    | 22   | -1,874469118 | -2,364608558 | -3,956736542 | 7,60E-05  | 0,00019701 | 4,81E-05   | TRUE |

|         |     |      |              |              |              |           |            |            |      |
|---------|-----|------|--------------|--------------|--------------|-----------|------------|------------|------|
| Rv3077  | 32  | 113  | -1,820178962 | -2,310318402 | -8,84480832  | 9,17E-19  | 6,42E-18   | 1,57E-18   | TRUE |
| Rv3078  | 11  | 38   | -1,788495895 | -2,278635335 | -5,086369555 | 3,65E-07  | 1,24E-06   | 3,03E-07   | TRUE |
| Rv3079c | 63  | 7    | 3,169925001  | 2,679785561  | 6,06246144   | 1,34E-09  | 5,56E-09   | 1,36E-09   | TRUE |
| Rv3080c | 135 | 32   | 2,076815597  | 1,586676157  | 6,350700036  | 2,14E-10  | 9,41E-10   | 2,30E-10   | TRUE |
| Rv3082c | 86  | 7    | 3,618909833  | 3,128770393  | 7,650924894  | 2,00E-14  | 1,11E-13   | 2,70E-14   | TRUE |
| Rv3086  | 158 | 57   | 1,470890734  | 0,980751294  | 4,717037091  | 2,39E-06  | 7,52E-06   | 1,84E-06   | TRUE |
| Rv3089  | 71  | 128  | -0,85025288  | -1,340392321 | -6,461400318 | 1,04E-10  | 4,65E-10   | 1,14E-10   | TRUE |
| Rv3094c | 115 | 19   | 2,597562538  | 2,107423097  | 7,113235262  | 1,13E-12  | 5,67E-12   | 1,38E-12   | TRUE |
| Rv3095  | 83  | 4    | 4,375039431  | 3,884899991  | 8,186574719  | 2,69E-16  | 1,65E-15   | 4,02E-16   | TRUE |
| Rv3097c | 165 | 61   | 1,435584877  | 0,945445437  | 4,675414601  | 2,93E-06  | 9,10E-06   | 2,22E-06   | TRUE |
| Rv3098A | 85  | 110  | -0,371968777 | -0,862108217 | -4,185458396 | 2,85E-05  | 7,79E-05   | 1,90E-05   | TRUE |
| Rv3099c | 42  | 7    | 2,584962501  | 2,094823061  | 4,282244797  | 1,85E-05  | 5,19E-05   | 1,27E-05   | TRUE |
| Rv3104c | 46  | 73   | -0,666262603 | -1,156402043 | -4,345976552 | 1,39E-05  | 3,93E-05   | 9,61E-06   | TRUE |
| Rv3105c | 31  | 49   | -0,660513534 | -1,150652974 | -3,546356385 | 0,000391  | 0,00092779 | 0,00022671 | TRUE |
| Rv3115  | 46  | 166  | -1,851477475 | -2,341616915 | -10,80701777 | 3,19E-27  | 3,10E-26   | 7,57E-27   | TRUE |
| Rv3116  | 93  | 26   | 1,838719093  | 1,348579653  | 4,66868429   | 3,03E-06  | 9,39E-06   | 2,29E-06   | TRUE |
| Rv3117  | 177 | 194  | -0,132307292 | -0,622446732 | -4,183791133 | 2,87E-05  | 7,83E-05   | 1,91E-05   | TRUE |
| Rv3118  | 97  | 208  | -1,100526876 | -1,590666316 | -9,360296085 | 7,95E-21  | 6,04E-20   | 1,48E-20   | TRUE |
| Rv3119  | 149 | 25   | 2,575312331  | 2,085172891  | 8,042361416  | 8,81E-16  | 5,27E-15   | 1,29E-15   | TRUE |
| Rv3120  | 35  | 4    | 3,129283017  | 2,639143577  | 4,481563945  | 7,41E-06  | 2,17E-05   | 5,30E-06   | TRUE |
| Rv3122  | 57  | 1    | 5,832890014  | 5,342750574  | 7,247128734  | 4,26E-13  | 2,19E-12   | 5,34E-13   | TRUE |
| Rv3123  | 34  | 2    | 4,087462841  | 3,597323401  | 5,099638986  | 3,40E-07  | 1,16E-06   | 2,84E-07   | TRUE |
| Rv3124  | 13  | 0    | 4,700439718  | 4,210300278  | 3,318724439  | 0,000904  | 0,00199507 | 0,00048723 | TRUE |
| Rv3127  | 98  | 559  | -2,511994629 | -3,002134069 | -22,67977609 | 7,09E-114 | 2,89E-112  | 7,05E-113  | TRUE |
| Rv3130c | 244 | 1422 | -2,542968412 | -3,033107852 | -36,36576001 | 1,48E-289 | 2,89E-287  | 7,07E-288  | TRUE |
| Rv3131  | 147 | 985  | -2,74430757  | -3,23444701  | -31,16113225 | 3,58E-213 | 3,89E-211  | 9,50E-212  | TRUE |
| Rv3132c | 67  | 248  | -1,88810712  | -2,37824656  | -13,33163622 | 1,52E-40  | 2,11E-39   | 5,16E-40   | TRUE |
| Rv3133c | 36  | 428  | -3,571541985 | -4,061681425 | -22,34266212 | 1,42E-110 | 5,50E-109  | 1,34E-109  | TRUE |
| Rv3134c | 64  | 402  | -2,651051691 | -3,141191131 | -19,64296644 | 6,64E-86  | 1,99E-84   | 4,87E-85   | TRUE |
| Rv3135  | 4   | 29   | -2,857980995 | -3,348120435 | -5,424373582 | 5,82E-08  | 2,12E-07   | 5,19E-08   | TRUE |
| Rv3136  | 27  | 126  | -2,222392421 | -2,712531861 | -10,22744085 | 1,49E-24  | 1,31E-23   | 3,20E-24   | TRUE |
| Rv3137  | 14  | 43   | -1,618909833 | -2,109049273 | -5,157354346 | 2,50E-07  | 8,67E-07   | 2,12E-07   | TRUE |
| Rv3138  | 52  | 75   | -0,528378972 | -1,018518412 | -3,973705833 | 7,08E-05  | 0,00018459 | 4,51E-05   | TRUE |
| Rv3139  | 209 | 356  | -0,768374299 | -1,258513739 | -10,26422631 | 1,02E-24  | 9,04E-24   | 2,21E-24   | TRUE |
| Rv3140  | 255 | 349  | -0,452729789 | -0,942869229 | -8,042206804 | 8,82E-16  | 5,27E-15   | 1,29E-15   | TRUE |
| Rv3150  | 15  | 44   | -1,552541023 | -2,042680463 | -5,11126193  | 3,20E-07  | 1,10E-06   | 2,68E-07   | TRUE |
| Rv3155  | 1   | 66   | -6,044394119 | -6,534533559 | -9,194608354 | 3,76E-20  | 2,76E-19   | 6,75E-20   | TRUE |

|         |      |      |              |              |              |          |            |            |      |
|---------|------|------|--------------|--------------|--------------|----------|------------|------------|------|
| Rv3158  | 60   | 168  | -1,485426827 | -1,975566267 | -9,773204528 | 1,47E-22 | 1,20E-21   | 2,93E-22   | TRUE |
| Rv3159c | 96   | 5    | 4,263034406  | 3,772894966  | 8,718159137  | 2,83E-18 | 1,91E-17   | 4,68E-18   | TRUE |
| Rv3160c | 72   | 3    | 4,584962501  | 4,094823061  | 7,749695285  | 9,21E-15 | 5,23E-14   | 1,28E-14   | TRUE |
| Rv3161c | 254  | 15   | 4,081794091  | 3,591654651  | 13,93112275  | 4,10E-44 | 6,30E-43   | 1,54E-43   | TRUE |
| Rv3166c | 31   | 82   | -1,403355694 | -1,893495134 | -6,63762254  | 3,19E-11 | 1,47E-10   | 3,60E-11   | TRUE |
| Rv3167c | 24   | 57   | -1,247927513 | -1,738066953 | -5,218378434 | 1,80E-07 | 6,33E-07   | 1,55E-07   | TRUE |
| Rv3168  | 139  | 18   | 2,949016071  | 2,458876631  | 8,585445433  | 9,05E-18 | 5,95E-17   | 1,45E-17   | TRUE |
| Rv3169  | 65   | 10   | 2,700439718  | 2,210300278  | 5,509614779  | 3,60E-08 | 1,33E-07   | 3,25E-08   | TRUE |
| Rv3171c | 97   | 110  | -0,181446871 | -0,671586311 | -3,369959542 | 0,000752 | 0,00169893 | 0,00041514 | TRUE |
| Rv3172c | 111  | 216  | -0,960471636 | -1,450611076 | -8,912581405 | 4,99E-19 | 3,50E-18   | 8,56E-19   | TRUE |
| Rv3173c | 140  | 51   | 1,456857675  | 0,966718235  | 4,387291736  | 1,15E-05 | 3,29E-05   | 8,05E-06   | TRUE |
| Rv3174  | 28   | 1    | 4,807354922  | 4,317215482  | 4,902577089  | 9,46E-07 | 3,10E-06   | 7,58E-07   | TRUE |
| Rv3175  | 19   | 1    | 4,247927513  | 3,757788073  | 3,873034813  | 0,000107 | 0,00027479 | 6,71E-05   | TRUE |
| Rv3176c | 128  | 20   | 2,678071905  | 2,187932465  | 7,683311972  | 1,55E-14 | 8,66E-14   | 2,12E-14   | TRUE |
| Rv3177  | 23   | 53   | -1,204358499 | -1,694497939 | -4,942975371 | 7,69E-07 | 2,55E-06   | 6,23E-07   | TRUE |
| Rv3181c | 18   | 49   | -1,444784843 | -1,934924283 | -5,205649297 | 1,93E-07 | 6,75E-07   | 1,65E-07   | TRUE |
| Rv3185  | 21   | 39   | -0,893084796 | -1,383224236 | -3,653059899 | 0,000259 | 0,00063403 | 0,00015493 | TRUE |
| Rv3187  | 22   | 47   | -1,095157233 | -1,585296673 | -4,437984035 | 9,08E-06 | 2,64E-05   | 6,45E-06   | TRUE |
| Rv3188  | 136  | 247  | -0,86090439  | -1,35104383  | -9,031323826 | 1,70E-19 | 1,22E-18   | 2,97E-19   | TRUE |
| Rv3189  | 148  | 347  | -1,229338487 | -1,719477927 | -12,78173396 | 2,07E-37 | 2,66E-36   | 6,49E-37   | TRUE |
| Rv3190c | 24   | 52   | -1,115477217 | -1,605616657 | -4,711315623 | 2,46E-06 | 7,71E-06   | 1,88E-06   | TRUE |
| Rv3198c | 60   | 122  | -1,023846742 | -1,513986182 | -6,913887015 | 4,72E-12 | 2,28E-11   | 5,58E-12   | TRUE |
| Rv3200c | 75   | 24   | 1,64385619   | 1,15371675   | 3,709946732  | 0,000207 | 0,00051074 | 0,0001248  | TRUE |
| Rv3201c | 108  | 135  | -0,321928095 | -0,812067535 | -4,40577464  | 1,05E-05 | 3,04E-05   | 7,42E-06   | TRUE |
| Rv3203  | 52   | 9    | 2,530514717  | 2,040375277  | 4,685016681  | 2,80E-06 | 8,71E-06   | 2,13E-06   | TRUE |
| Rv3205c | 705  | 284  | 1,311732328  | 0,821592888  | 8,58406286   | 9,16E-18 | 6,01E-17   | 1,47E-17   | TRUE |
| Rv3206c | 2484 | 1378 | 0,850089286  | 0,359949845  | 7,6599671    | 1,86E-14 | 1,03E-13   | 2,52E-14   | TRUE |
| Rv3207c | 43   | 211  | -2,294834434 | -2,784973874 | -13,41950358 | 4,65E-41 | 6,65E-40   | 1,62E-40   | TRUE |
| Rv3208  | 38   | 106  | -1,479992941 | -1,970132381 | -7,748702312 | 9,28E-15 | 5,25E-14   | 1,28E-14   | TRUE |
| Rv3208A | 5    | 25   | -2,321928095 | -2,812067535 | -4,641811333 | 3,45E-06 | 1,06E-05   | 2,59E-06   | TRUE |
| Rv3211  | 276  | 41   | 2,750972452  | 2,260833012  | 11,5126435   | 1,14E-30 | 1,20E-29   | 2,93E-30   | TRUE |
| Rv3212  | 50   | 13   | 1,943416472  | 1,453277032  | 3,62258318   | 0,000292 | 0,00070526 | 0,00017223 | TRUE |
| Rv3219  | 1851 | 9541 | -2,365835589 | -2,855975029 | -91,85675603 | 0        | 0          | 0          | TRUE |
| Rv3220c | 285  | 663  | -1,218046951 | -1,708186391 | -17,59047699 | 2,91E-69 | 6,77E-68   | 1,66E-68   | TRUE |
| Rv3221A | 457  | 66   | 2,791656236  | 2,301516796  | 14,97604841  | 1,05E-50 | 1,83E-49   | 4,47E-50   | TRUE |
| Rv3221c | 160  | 53   | 1,59400764   | 1,1038682    | 5,229885134  | 1,70E-07 | 5,97E-07   | 1,46E-07   | TRUE |
| Rv3222c | 329  | 108  | 1,607056272  | 1,116916832  | 7,57184041   | 3,68E-14 | 2,01E-13   | 4,90E-14   | TRUE |

|         |      |      |              |              |              |           |            |            |      |
|---------|------|------|--------------|--------------|--------------|-----------|------------|------------|------|
| Rv3223c | 806  | 421  | 0,936959605  | 0,446820165  | 5,327410227  | 9,96E-08  | 3,57E-07   | 8,71E-08   | TRUE |
| Rv3227  | 19   | 35   | -0,881355504 | -1,371494944 | -3,438281182 | 0,000585  | 0,00134633 | 0,00032898 | TRUE |
| Rv3228  | 15   | 30   | -1           | -1,49013944  | -3,38820319  | 0,000704  | 0,00159446 | 0,00038962 | TRUE |
| Rv3230c | 654  | 1029 | -0,653880441 | -1,144019881 | -16,19137756 | 5,80E-59  | 1,13E-57   | 2,77E-58   | TRUE |
| Rv3231c | 13   | 40   | -1,621488377 | -2,111627817 | -4,97804066  | 6,42E-07  | 2,14E-06   | 5,23E-07   | TRUE |
| Rv3233c | 31   | 1    | 4,95419631   | 4,46405687   | 5,199977714  | 1,99E-07  | 6,95E-07   | 1,70E-07   | TRUE |
| Rv3234c | 48   | 8    | 2,584962501  | 2,094823061  | 4,577925567  | 4,70E-06  | 1,41E-05   | 3,45E-06   | TRUE |
| Rv3236c | 84   | 271  | -1,689831619 | -2,179971059 | -13,22114794 | 6,62E-40  | 9,08E-39   | 2,22E-39   | TRUE |
| Rv3239c | 92   | 28   | 1,716207034  | 1,226067594  | 4,312265816  | 1,62E-05  | 4,54E-05   | 1,11E-05   | TRUE |
| Rv3240c | 555  | 283  | 0,971685718  | 0,481546278  | 4,734682229  | 2,19E-06  | 6,92E-06   | 1,69E-06   | TRUE |
| Rv3245c | 155  | 28   | 2,468769483  | 1,978630043  | 7,928654211  | 2,22E-15  | 1,30E-14   | 3,16E-15   | TRUE |
| Rv3247c | 28   | 1    | 4,807354922  | 4,317215482  | 4,902577089  | 9,46E-07  | 3,10E-06   | 7,58E-07   | TRUE |
| Rv3248c | 1640 | 113  | 3,859301137  | 3,369161697  | 34,52653692  | 3,21E-261 | 5,45E-259  | 1,33E-259  | TRUE |
| Rv3249c | 544  | 7    | 6,280107919  | 5,789968479  | 22,45487955  | 1,15E-111 | 4,57E-110  | 1,12E-110  | TRUE |
| Rv3250c | 1261 | 110  | 3,518992847  | 3,028853407  | 28,86860669  | 2,96E-183 | 2,46E-181  | 6,01E-182  | TRUE |
| Rv3251c | 568  | 13   | 5,449307401  | 4,959167961  | 22,69627205  | 4,88E-114 | 2,03E-112  | 4,95E-113  | TRUE |
| Rv3252c | 1442 | 282  | 2,354304097  | 1,864164657  | 23,25655836  | 1,22E-119 | 5,48E-118  | 1,34E-118  | TRUE |
| Rv3257c | 255  | 62   | 2,040157126  | 1,550017686  | 8,581494822  | 9,36E-18  | 6,14E-17   | 1,50E-17   | TRUE |
| Rv3258c | 35   | 8    | 2,129283017  | 1,639143577  | 3,310118966  | 0,000933  | 0,0020528  | 0,00050133 | TRUE |
| Rv3260c | 58   | 132  | -1,186413124 | -1,676552564 | -7,742678981 | 9,73E-15  | 5,50E-14   | 1,34E-14   | TRUE |
| Rv3264c | 57   | 88   | -0,626541604 | -1,116681045 | -4,639631869 | 3,49E-06  | 1,07E-05   | 2,62E-06   | TRUE |
| Rv3266c | 53   | 6    | 3,142957954  | 2,652818514  | 5,53034195   | 3,20E-08  | 1,19E-07   | 2,90E-08   | TRUE |
| Rv3267  | 67   | 7    | 3,258734268  | 2,768594828  | 6,360514567  | 2,01E-10  | 8,84E-10   | 2,16E-10   | TRUE |
| Rv3268  | 62   | 15   | 2,047305715  | 1,557166275  | 4,245217275  | 2,18E-05  | 6,07E-05   | 1,48E-05   | TRUE |
| Rv3272  | 49   | 10   | 2,292781749  | 1,802642309  | 4,186956655  | 2,83E-05  | 7,74E-05   | 1,89E-05   | TRUE |
| Rv3273  | 69   | 109  | -0,659659868 | -1,149799308 | -5,286450115 | 1,25E-07  | 4,44E-07   | 1,08E-07   | TRUE |
| Rv3274c | 164  | 39   | 2,072149786  | 1,582010346  | 6,98483498   | 2,85E-12  | 1,39E-11   | 3,41E-12   | TRUE |
| Rv3283  | 199  | 92   | 1,113062664  | 0,622923224  | 3,577610109  | 0,000347  | 0,00083173 | 0,00020324 | TRUE |
| Rv3288c | 649  | 113  | 2,521895706  | 2,031756266  | 16,51089315  | 3,06E-61  | 6,30E-60   | 1,54E-60   | TRUE |
| Rv3289c | 398  | 44   | 3,177193002  | 2,687053562  | 15,26184317  | 1,37E-52  | 2,46E-51   | 6,01E-52   | TRUE |
| Rv3290c | 1629 | 379  | 2,10371685   | 1,61357741   | 22,34930111  | 1,23E-110 | 4,79E-109  | 1,17E-109  | TRUE |
| Rv3295  | 153  | 51   | 1,584962501  | 1,094823061  | 5,080229914  | 3,77E-07  | 1,28E-06   | 3,13E-07   | TRUE |
| Rv3296  | 29   | 112  | -1,949373927 | -2,439513367 | -9,092118123 | 9,71E-20  | 7,04E-19   | 1,72E-19   | TRUE |
| Rv3300c | 25   | 4    | 2,64385619   | 2,15371675   | 3,362189686  | 0,000773  | 0,00174293 | 0,00042553 | TRUE |
| Rv3301c | 63   | 262  | -2,056143078 | -2,546282518 | -14,24989894 | 4,49E-46  | 7,24E-45   | 1,77E-45   | TRUE |
| Rv3309c | 84   | 11   | 2,932885804  | 2,442746364  | 6,64875782   | 2,96E-11  | 1,37E-10   | 3,35E-11   | TRUE |
| Rv3312A | 7    | 20   | -1,514573173 | -2,004712613 | -3,404228495 | 0,000664  | 0,00150992 | 0,00036896 | TRUE |

|         |     |     |              |              |              |          |            |            |      |
|---------|-----|-----|--------------|--------------|--------------|----------|------------|------------|------|
| Rv3312c | 62  | 18  | 1,784271309  | 1,294131869  | 3,692668133  | 0,000222 | 0,00054536 | 0,00013326 | TRUE |
| Rv3314c | 8   | 59  | -2,882643049 | -3,372782489 | -7,760925373 | 8,43E-15 | 4,81E-14   | 1,17E-14   | TRUE |
| Rv3316  | 9   | 22  | -1,289506617 | -1,779646057 | -3,295608847 | 0,000982 | 0,00215573 | 0,00052677 | TRUE |
| Rv3318  | 8   | 23  | -1,523561956 | -2,013701396 | -3,661297266 | 0,000251 | 0,00061515 | 0,00015031 | TRUE |
| Rv3323c | 51  | 105 | -1,041820176 | -1,531959616 | -6,469986833 | 9,80E-11 | 4,40E-10   | 1,08E-10   | TRUE |
| Rv3326  | 19  | 51  | -1,424497829 | -1,914637269 | -5,273658162 | 1,34E-07 | 4,74E-07   | 1,16E-07   | TRUE |
| Rv3333c | 10  | 32  | -1,678071905 | -2,168211345 | -4,527169984 | 5,98E-06 | 1,77E-05   | 4,32E-06   | TRUE |
| Rv3334  | 575 | 97  | 2,567505304  | 2,077365864  | 15,76424529  | 5,48E-56 | 1,03E-54   | 2,52E-55   | TRUE |
| Rv3338  | 61  | 96  | -0,654225163 | -1,144364603 | -4,942340019 | 7,72E-07 | 2,56E-06   | 6,25E-07   | TRUE |
| Rv3339c | 72  | 16  | 2,169925001  | 1,679785561  | 4,831288112  | 1,36E-06 | 4,39E-06   | 1,07E-06   | TRUE |
| Rv3340  | 110 | 459 | -2,06099063  | -2,55113007  | -18,88331882 | 1,56E-79 | 4,16E-78   | 1,02E-78   | TRUE |
| Rv3341  | 42  | 272 | -2,695145418 | -3,185284859 | -16,25872266 | 1,94E-59 | 3,82E-58   | 9,34E-59   | TRUE |
| Rv3342  | 27  | 220 | -3,026472211 | -3,516611651 | -15,24190468 | 1,86E-52 | 3,32E-51   | 8,12E-52   | TRUE |
| Rv3343c | 195 | 421 | -1,110346109 | -1,600485549 | -13,37849367 | 8,08E-41 | 1,14E-39   | 2,79E-40   | TRUE |
| Rv3347c | 789 | 459 | 0,781531147  | 0,291391707  | 3,531332839  | 0,000413 | 0,00097618 | 0,00023854 | TRUE |
| Rv3352c | 3   | 27  | -3,169925001 | -3,660064441 | -5,420546782 | 5,94E-08 | 2,17E-07   | 5,29E-08   | TRUE |
| Rv3354  | 10  | 49  | -2,292781749 | -2,782921189 | -6,463828312 | 1,02E-10 | 4,58E-10   | 1,12E-10   | TRUE |
| Rv3357  | 15  | 122 | -3,023846742 | -3,513986182 | -11,34653751 | 7,72E-30 | 8,03E-29   | 1,96E-29   | TRUE |
| Rv3360  | 24  | 63  | -1,392317423 | -1,882456863 | -5,795107596 | 6,83E-09 | 2,70E-08   | 6,59E-09   | TRUE |
| Rv3365c | 39  | 60  | -0,621488377 | -1,111627817 | -3,816952781 | 0,000135 | 0,00034127 | 8,34E-05   | TRUE |
| Rv3370c | 84  | 26  | 1,691877705  | 1,201738265  | 4,055791489  | 5,00E-05 | 0,00013259 | 3,24E-05   | TRUE |
| Rv3371  | 46  | 285 | -2,631256153 | -3,121395593 | -16,49062104 | 4,29E-61 | 8,76E-60   | 2,14E-60   | TRUE |
| Rv3372  | 12  | 35  | -1,544320516 | -2,034459956 | -4,546744047 | 5,45E-06 | 1,62E-05   | 3,96E-06   | TRUE |
| Rv3373  | 4   | 16  | -2           | -2,49013944  | -3,476972493 | 0,000507 | 0,00117873 | 0,00028803 | TRUE |
| Rv3374  | 0   | 11  | -4,459431619 | -4,949571059 | -3,741863271 | 0,000183 | 0,00045461 | 0,00011073 | TRUE |
| Rv3376  | 57  | 330 | -2,5334322   | -3,02357164  | -17,48302879 | 1,93E-68 | 4,43E-67   | 1,08E-67   | TRUE |
| Rv3384c | 34  | 80  | -1,234465254 | -1,724604694 | -6,148754546 | 7,81E-10 | 3,31E-09   | 8,09E-10   | TRUE |
| Rv3385c | 48  | 81  | -0,754887502 | -1,245026942 | -4,853677782 | 1,21E-06 | 3,94E-06   | 9,64E-07   | TRUE |
| Rv3389c | 60  | 244 | -2,023846742 | -2,513986182 | -13,65334401 | 1,93E-42 | 2,84E-41   | 6,94E-42   | TRUE |
| Rv3392c | 4   | 15  | -1,906890596 | -2,397030036 | -3,293394471 | 0,00099  | 0,00217034 | 0,00053034 | TRUE |
| Rv3395c | 15  | 1   | 3,906890596  | 3,416751156  | 3,319453818  | 0,000902 | 0,00199607 | 0,00048679 | TRUE |
| Rv3396c | 30  | 210 | -2,807354922 | -3,297494362 | -14,5040272  | 1,14E-47 | 1,88E-46   | 4,60E-47   | TRUE |
| Rv3399  | 28  | 64  | -1,192645078 | -1,682784518 | -5,405219194 | 6,47E-08 | 2,35E-07   | 5,75E-08   | TRUE |
| Rv3402c | 37  | 175 | -2,241757746 | -2,731897186 | -12,09885481 | 1,07E-33 | 1,20E-32   | 2,94E-33   | TRUE |
| Rv3403c | 77  | 14  | 2,459431619  | 1,969292179  | 5,570706121  | 2,54E-08 | 9,49E-08   | 2,32E-08   | TRUE |
| Rv3404c | 41  | 10  | 2,03562391   | 1,54548447   | 3,433203297  | 0,000596 | 0,00136978 | 0,00033462 | TRUE |
| Rv3405c | 159 | 44  | 1,853451337  | 1,363311897  | 6,15572604   | 7,47E-10 | 3,17E-09   | 7,75E-10   | TRUE |

|         |      |     |              |              |              |           |            |            |      |
|---------|------|-----|--------------|--------------|--------------|-----------|------------|------------|------|
| Rv3406  | 970  | 16  | 5,921840937  | 5,431701497  | 29,93308991  | 7,30E-197 | 6,96E-195  | 1,70E-195  | TRUE |
| Rv3407  | 1412 | 479 | 1,559642528  | 1,069503087  | 15,15575605  | 6,94E-52  | 1,22E-50   | 2,98E-51   | TRUE |
| Rv3408  | 416  | 71  | 2,550692599  | 2,060553159  | 13,33794312  | 1,39E-40  | 1,95E-39   | 4,76E-40   | TRUE |
| Rv3410c | 102  | 9   | 3,502500341  | 3,0123609    | 8,185812016  | 2,70E-16  | 1,65E-15   | 4,04E-16   | TRUE |
| Rv3411c | 208  | 92  | 1,176877762  | 0,686738322  | 3,987988476  | 6,66E-05  | 0,00017452 | 4,26E-05   | TRUE |
| Rv3414c | 43   | 9   | 2,256339753  | 1,766200313  | 3,867286197  | 0,00011   | 0,0002807  | 6,85E-05   | TRUE |
| Rv3417c | 663  | 302 | 1,134460321  | 0,644320881  | 6,731962392  | 1,67E-11  | 7,89E-11   | 1,93E-11   | TRUE |
| Rv3418c | 1797 | 664 | 1,436335262  | 0,946195822  | 15,45797514  | 6,67E-54  | 1,22E-52   | 2,97E-53   | TRUE |
| Rv3423c | 18   | 75  | -2,058893689 | -2,549033129 | -7,6279237   | 2,39E-14  | 1,31E-13   | 3,21E-14   | TRUE |
| Rv3425  | 64   | 6   | 3,415037499  | 2,924898059  | 6,391931547  | 1,64E-10  | 7,26E-10   | 1,77E-10   | TRUE |
| Rv3426  | 20   | 131 | -2,711494907 | -3,201634347 | -11,30841977 | 1,19E-29  | 1,24E-28   | 3,03E-29   | TRUE |
| Rv3427c | 16   | 52  | -1,700439718 | -2,190579158 | -5,808087196 | 6,32E-09  | 2,50E-08   | 6,12E-09   | TRUE |
| Rv3428c | 35   | 5   | 2,807354922  | 2,317215482  | 4,160650393  | 3,17E-05  | 8,64E-05   | 2,11E-05   | TRUE |
| Rv3432c | 16   | 44  | -1,459431619 | -1,949571059 | -4,957633144 | 7,14E-07  | 2,37E-06   | 5,79E-07   | TRUE |
| Rv3434c | 30   | 3   | 3,321928095  | 2,831788655  | 4,305809644  | 1,66E-05  | 4,67E-05   | 1,14E-05   | TRUE |
| Rv3437  | 35   | 61  | -0,801454321 | -1,291593761 | -4,334387224 | 1,46E-05  | 4,14E-05   | 1,01E-05   | TRUE |
| Rv3438  | 64   | 6   | 3,415037499  | 2,924898059  | 6,391931547  | 1,64E-10  | 7,26E-10   | 1,77E-10   | TRUE |
| Rv3439c | 22   | 46  | -1,064130337 | -1,554269777 | -4,327792259 | 1,51E-05  | 4,26E-05   | 1,04E-05   | TRUE |
| Rv3440c | 15   | 1   | 3,906890596  | 3,416751156  | 3,319453818  | 0,000902  | 0,00199607 | 0,00048679 | TRUE |
| Rv3445c | 6    | 66  | -3,459431619 | -3,949571059 | -8,69786094  | 3,38E-18  | 2,27E-17   | 5,55E-18   | TRUE |
| Rv3450c | 41   | 59  | -0,525091045 | -1,015230485 | -3,51501718  | 0,00044   | 0,00103193 | 0,00025216 | TRUE |
| Rv3454  | 21   | 99  | -2,237039197 | -2,727178637 | -9,091367076 | 9,78E-20  | 7,07E-19   | 1,73E-19   | TRUE |
| Rv3456c | 184  | 257 | -0,482062593 | -0,972202033 | -7,079211802 | 1,45E-12  | 7,20E-12   | 1,76E-12   | TRUE |
| Rv3457c | 373  | 446 | -0,25786808  | -0,74800752  | -7,461150541 | 8,58E-14  | 4,60E-13   | 1,12E-13   | TRUE |
| Rv3458c | 236  | 100 | 1,23878686   | 0,74864742   | 4,58155645   | 4,62E-06  | 1,39E-05   | 3,39E-06   | TRUE |
| Rv3459c | 221  | 237 | -0,10084069  | -0,59098013  | -4,414734209 | 1,01E-05  | 2,92E-05   | 7,13E-06   | TRUE |
| Rv3461c | 176  | 61  | 1,528694281  | 1,038554841  | 5,219416707  | 1,79E-07  | 6,30E-07   | 1,54E-07   | TRUE |
| Rv3463  | 134  | 14  | 3,258734268  | 2,768594828  | 8,99535731   | 2,35E-19  | 1,67E-18   | 4,09E-19   | TRUE |
| Rv3464  | 108  | 38  | 1,506959989  | 1,016820549  | 4,017978991  | 5,87E-05  | 0,00015477 | 3,78E-05   | TRUE |
| Rv3465  | 27   | 60  | -1,152003093 | -1,642142533 | -5,143264162 | 2,70E-07  | 9,31E-07   | 2,27E-07   | TRUE |
| Rv3468c | 4    | 51  | -3,672425342 | -4,162564782 | -7,766125101 | 8,09E-15  | 4,63E-14   | 1,13E-14   | TRUE |
| Rv3472  | 52   | 12  | 2,115477217  | 1,625337777  | 4,010339398  | 6,06E-05  | 0,00015944 | 3,90E-05   | TRUE |
| Rv3475  | 12   | 48  | -2           | -2,49013944  | -6,022407442 | 1,72E-09  | 7,08E-09   | 1,73E-09   | TRUE |
| Rv3476c | 35   | 75  | -1,099535674 | -1,589675114 | -5,617532521 | 1,94E-08  | 7,34E-08   | 1,79E-08   | TRUE |
| Rv3477  | 86   | 424 | -2,3016557   | -2,79179514  | -19,04919353 | 6,67E-81  | 1,82E-79   | 4,45E-80   | TRUE |
| Rv3478  | 51   | 553 | -3,438710328 | -3,928849768 | -25,13936732 | 1,85E-139 | 9,88E-138  | 2,41E-138  | TRUE |
| Rv3479  | 82   | 250 | -1,60823228  | -2,09837172  | -12,39718867 | 2,71E-35  | 3,16E-34   | 7,73E-35   | TRUE |

|         |      |     |              |              |              |           |            |            |      |
|---------|------|-----|--------------|--------------|--------------|-----------|------------|------------|------|
| Rv3480c | 84   | 117 | -0,478047297 | -0,968186737 | -4,759430802 | 1,94E-06  | 6,16E-06   | 1,51E-06   | TRUE |
| Rv3483c | 50   | 66  | -0,40053793  | -0,89067737  | -3,332782708 | 0,00086   | 0,0019148  | 0,00046776 | TRUE |
| Rv3485c | 23   | 158 | -2,780218792 | -3,270358232 | -12,53577296 | 4,76E-36  | 5,68E-35   | 1,39E-35   | TRUE |
| Rv3487c | 31   | 75  | -1,27462238  | -1,76476182  | -6,049857926 | 1,45E-09  | 6,00E-09   | 1,47E-09   | TRUE |
| Rv3491  | 82   | 27  | 1,602664502  | 1,112525062  | 3,767531948  | 0,000165  | 0,00041297 | 0,00010091 | TRUE |
| Rv3501c | 34   | 1   | 5,087462841  | 4,597323401  | 5,480324324  | 4,25E-08  | 1,56E-07   | 3,82E-08   | TRUE |
| Rv3502c | 278  | 20  | 3,797012978  | 3,306873538  | 14,09786059  | 3,91E-45  | 6,11E-44   | 1,49E-44   | TRUE |
| Rv3503c | 255  | 51  | 2,321928095  | 1,831788655  | 9,658067644  | 4,54E-22  | 3,60E-21   | 8,79E-22   | TRUE |
| Rv3504  | 478  | 163 | 1,552138654  | 1,061999214  | 8,761945337  | 1,92E-18  | 1,31E-17   | 3,20E-18   | TRUE |
| Rv3505  | 221  | 20  | 3,465974465  | 2,975835024  | 11,97918236  | 4,57E-33  | 5,00E-32   | 1,22E-32   | TRUE |
| Rv3507  | 46   | 12  | 1,938599455  | 1,448460015  | 3,466026399  | 0,000528  | 0,00122486 | 0,00029914 | TRUE |
| Rv3513c | 134  | 19  | 2,818161677  | 2,328022237  | 8,164060539  | 3,24E-16  | 1,97E-15   | 4,82E-16   | TRUE |
| Rv3515c | 491  | 33  | 3,895185095  | 3,405045655  | 18,9677546   | 3,15E-80  | 8,43E-79   | 2,06E-79   | TRUE |
| Rv3516  | 93   | 2   | 5,539158811  | 5,049019371  | 9,204936042  | 3,42E-20  | 2,51E-19   | 6,14E-20   | TRUE |
| Rv3517  | 26   | 64  | -1,299560282 | -1,789699722 | -5,643103401 | 1,67E-08  | 6,35E-08   | 1,55E-08   | TRUE |
| Rv3518c | 314  | 151 | 1,05621601   | 0,56607657   | 4,124702426  | 3,71E-05  | 0,00010018 | 2,45E-05   | TRUE |
| Rv3519  | 54   | 15  | 1,847996907  | 1,357857467  | 3,576173546  | 0,000349  | 0,0008358  | 0,00020423 | TRUE |
| Rv3520c | 142  | 176 | -0,309684499 | -0,799823939 | -4,965404857 | 6,86E-07  | 2,28E-06   | 5,57E-07   | TRUE |
| Rv3521  | 47   | 7   | 2,74723393   | 2,25709449   | 4,745549832  | 2,08E-06  | 6,58E-06   | 1,61E-06   | TRUE |
| Rv3526  | 1388 | 273 | 2,346034712  | 1,855895272  | 22,74770846  | 1,51E-114 | 6,35E-113  | 1,55E-113  | TRUE |
| Rv3529c | 181  | 42  | 2,107528464  | 1,617389024  | 7,456240307  | 8,90E-14  | 4,76E-13   | 1,16E-13   | TRUE |
| Rv3530c | 94   | 6   | 3,969626351  | 3,479486911  | 8,370968348  | 5,71E-17  | 3,60E-16   | 8,80E-17   | TRUE |
| Rv3531c | 790  | 54  | 3,870821341  | 3,380681901  | 23,99078916  | 3,47E-127 | 1,69E-125  | 4,14E-126  | TRUE |
| Rv3533c | 151  | 18  | 3,068479738  | 2,578340298  | 9,190898216  | 3,90E-20  | 2,85E-19   | 6,97E-20   | TRUE |
| Rv3534c | 309  | 84  | 1,879145605  | 1,389006165  | 8,705128491  | 3,17E-18  | 2,14E-17   | 5,23E-18   | TRUE |
| Rv3535c | 720  | 252 | 1,514573173  | 1,024433733  | 10,44276208  | 1,58E-25  | 1,42E-24   | 3,48E-25   | TRUE |
| Rv3536c | 379  | 60  | 2,659163443  | 2,169024003  | 13,15128607  | 1,67E-39  | 2,28E-38   | 5,56E-39   | TRUE |
| Rv3537  | 159  | 58  | 1,45490196   | 0,96476252   | 4,667718987  | 3,05E-06  | 9,42E-06   | 2,30E-06   | TRUE |
| Rv3538  | 96   | 6   | 4            | 3,50986056   | 8,488605103  | 2,09E-17  | 1,35E-16   | 3,29E-17   | TRUE |
| Rv3542c | 30   | 5   | 2,584962501  | 2,094823061  | 3,619136355  | 0,000296  | 0,00071273 | 0,00017411 | TRUE |
| Rv3543c | 86   | 30  | 1,519374159  | 1,029234719  | 3,621379342  | 0,000293  | 0,00070767 | 0,00017292 | TRUE |
| Rv3544c | 270  | 61  | 2,146078259  | 1,655938819  | 9,262161529  | 2,00E-20  | 1,49E-19   | 3,64E-20   | TRUE |
| Rv3545c | 715  | 192 | 1,896836931  | 1,406697491  | 13,37279427  | 8,72E-41  | 1,23E-39   | 3,00E-40   | TRUE |
| Rv3546  | 294  | 28  | 3,392317423  | 2,902177983  | 13,6482085   | 2,07E-42  | 3,04E-41   | 7,42E-42   | TRUE |
| Rv3547  | 97   | 4   | 4,599912842  | 4,109773402  | 9,004600218  | 2,16E-19  | 1,54E-18   | 3,76E-19   | TRUE |
| Rv3556c | 64   | 11  | 2,540568381  | 2,050428941  | 5,214108218  | 1,85E-07  | 6,47E-07   | 1,58E-07   | TRUE |
| Rv3560c | 17   | 1   | 4,087462841  | 3,597323401  | 3,605971653  | 0,000311  | 0,00074802 | 0,00018273 | TRUE |



|         |      |      |              |              |              |           |            |            |      |
|---------|------|------|--------------|--------------|--------------|-----------|------------|------------|------|
| Rv3562  | 4    | 34   | -3,087462841 | -3,577602281 | -6,031304693 | 1,63E-09  | 6,71E-09   | 1,64E-09   | TRUE |
| Rv3566A | 25   | 2    | 3,64385619   | 3,15371675   | 4,139971022  | 3,47E-05  | 9,40E-05   | 2,30E-05   | TRUE |
| Rv3567c | 94   | 4    | 4,554588852  | 4,064449412  | 8,835622507  | 9,95E-19  | 6,94E-18   | 1,70E-18   | TRUE |
| Rv3568c | 400  | 34   | 3,556393349  | 3,066253908  | 16,34863363  | 4,45E-60  | 8,95E-59   | 2,19E-59   | TRUE |
| Rv3569c | 453  | 32   | 3,82336724   | 3,3332278    | 18,05791523  | 6,84E-73  | 1,71E-71   | 4,18E-72   | TRUE |
| Rv3570c | 854  | 91   | 3,230297619  | 2,740158179  | 22,5929392   | 5,08E-113 | 2,05E-111  | 5,00E-112  | TRUE |
| Rv3571  | 399  | 172  | 1,213980182  | 0,723840741  | 5,785381098  | 7,23E-09  | 2,85E-08   | 6,97E-09   | TRUE |
| Rv3572  | 33   | 4    | 3,044394119  | 2,554254679  | 4,274074367  | 1,92E-05  | 5,37E-05   | 1,31E-05   | TRUE |
| Rv3573c | 145  | 54   | 1,425021588  | 0,934882148  | 4,341816005  | 1,41E-05  | 4,00E-05   | 9,79E-06   | TRUE |
| Rv3574  | 139  | 10   | 3,797012978  | 3,306873538  | 9,968251433  | 2,10E-23  | 1,79E-22   | 4,37E-23   | TRUE |
| Rv3575c | 14   | 40   | -1,514573173 | -2,004712613 | -4,814373753 | 1,48E-06  | 4,76E-06   | 1,16E-06   | TRUE |
| Rv3576  | 50   | 5    | 3,321928095  | 2,831788655  | 5,558818098  | 2,72E-08  | 1,01E-07   | 2,47E-08   | TRUE |
| Rv3580c | 245  | 329  | -0,425305835 | -0,915445275 | -7,61724314  | 2,59E-14  | 1,42E-13   | 3,47E-14   | TRUE |
| Rv3581c | 356  | 160  | 1,153805336  | 0,663665896  | 5,062832769  | 4,13E-07  | 1,40E-06   | 3,41E-07   | TRUE |
| Rv3582c | 1382 | 280  | 2,303258883  | 1,813119443  | 22,34047729  | 1,49E-110 | 5,72E-109  | 1,40E-109  | TRUE |
| Rv3583c | 3190 | 1369 | 1,220433977  | 0,730294537  | 16,52172782  | 2,56E-61  | 5,29E-60   | 1,29E-60   | TRUE |
| Rv3585  | 15   | 1    | 3,906890596  | 3,416751156  | 3,319453818  | 0,000902  | 0,00199607 | 0,00048679 | TRUE |
| Rv3592  | 65   | 20   | 1,700439718  | 1,210300278  | 3,587781905  | 0,000334  | 0,00080045 | 0,00019559 | TRUE |
| Rv3593  | 94   | 6    | 3,969626351  | 3,479486911  | 8,370968348  | 5,71E-17  | 3,60E-16   | 8,80E-17   | TRUE |
| Rv3596c | 2074 | 1649 | 0,330824495  | -0,159314945 | -3,389597806 | 0,0007    | 0,00159006 | 0,00038854 | TRUE |
| Rv3597c | 359  | 54   | 2,732952532  | 2,242813092  | 13,06668496  | 5,10E-39  | 6,80E-38   | 1,66E-38   | TRUE |
| Rv3600c | 40   | 9    | 2,152003093  | 1,661863653  | 3,573627395  | 0,000352  | 0,0008432  | 0,00020598 | TRUE |
| Rv3601c | 57   | 6    | 3,247927513  | 2,757788073  | 5,854710454  | 4,78E-09  | 1,92E-08   | 4,68E-09   | TRUE |
| Rv3602c | 58   | 18   | 1,688055994  | 1,197916554  | 3,361606105  | 0,000775  | 0,0017441  | 0,00042618 | TRUE |
| Rv3603c | 323  | 50   | 2,691534165  | 2,201394725  | 12,25279226  | 1,62E-34  | 1,86E-33   | 4,56E-34   | TRUE |
| Rv3608c | 88   | 126  | -0,517848305 | -1,007987745 | -5,106829244 | 3,28E-07  | 1,12E-06   | 2,74E-07   | TRUE |
| Rv3609c | 87   | 30   | 1,5360529    | 1,04591346   | 3,690716584  | 0,000224  | 0,00054921 | 0,0001342  | TRUE |
| Rv3610c | 756  | 341  | 1,148614495  | 0,658475055  | 7,329069599  | 2,32E-13  | 1,21E-12   | 2,95E-13   | TRUE |
| Rv3612c | 35   | 75   | -1,099535674 | -1,589675114 | -5,617532521 | 1,94E-08  | 7,34E-08   | 1,79E-08   | TRUE |
| Rv3613c | 29   | 102  | -1,814444347 | -2,304583787 | -8,390707151 | 4,83E-17  | 3,06E-16   | 7,47E-17   | TRUE |
| Rv3614c | 229  | 602  | -1,394415889 | -1,884555329 | -17,93440285 | 6,35E-72  | 1,52E-70   | 3,72E-71   | TRUE |
| Rv3615c | 177  | 1301 | -2,877799697 | -3,367939137 | -36,44206373 | 9,19E-291 | 1,89E-288  | 4,61E-289  | TRUE |
| Rv3616c | 372  | 2197 | -2,562160343 | -3,052299783 | -45,35400385 | 0         | 0          | 0          | TRUE |
| Rv3620c | 27   | 3    | 3,169925001  | 2,679785561  | 3,968756079  | 7,22E-05  | 0,00018828 | 4,60E-05   | TRUE |
| Rv3623  | 9    | 25   | -1,473931188 | -1,964070628 | -3,755250696 | 0,000173  | 0,00043292 | 0,00010579 | TRUE |
| Rv3629c | 67   | 97   | -0,533823652 | -1,023963092 | -4,539060645 | 5,65E-06  | 1,68E-05   | 4,09E-06   | TRUE |
| Rv3635  | 71   | 4    | 4,14974712   | 3,659607679  | 7,416538836  | 1,20E-13  | 6,38E-13   | 1,56E-13   | TRUE |

|         |      |      |              |              |              |           |            |            |      |
|---------|------|------|--------------|--------------|--------------|-----------|------------|------------|------|
| Rv3641c | 78   | 17   | 2,197939378  | 1,707799938  | 5,087683933  | 3,62E-07  | 1,24E-06   | 3,02E-07   | TRUE |
| Rv3642c | 182  | 82   | 1,150242636  | 0,660103196  | 3,602256429  | 0,000315  | 0,00075809 | 0,00018524 | TRUE |
| Rv3645  | 49   | 153  | -1,642677999 | -2,132817439 | -9,798253866 | 1,15E-22  | 9,42E-22   | 2,30E-22   | TRUE |
| Rv3646c | 147  | 42   | 1,807354922  | 1,317215482  | 5,76457744   | 8,19E-09  | 3,21E-08   | 7,83E-09   | TRUE |
| Rv3651  | 39   | 70   | -0,843880798 | -1,334020238 | -4,760564967 | 1,93E-06  | 6,14E-06   | 1,50E-06   | TRUE |
| Rv3668c | 29   | 4    | 2,857980995  | 2,367841555  | 3,836199272  | 0,000125  | 0,00031695 | 7,74E-05   | TRUE |
| Rv3670  | 10   | 24   | -1,263034406 | -1,753173846 | -3,406545954 | 0,000658  | 0,0014989  | 0,00036627 | TRUE |
| Rv3671c | 41   | 198  | -2,271804615 | -2,761944056 | -12,94351046 | 2,56E-38  | 3,35E-37   | 8,19E-38   | TRUE |
| Rv3672c | 61   | 16   | 1,930737338  | 1,440597898  | 3,975116049  | 7,03E-05  | 0,00018387 | 4,49E-05   | TRUE |
| Rv3673c | 144  | 41   | 1,812372997  | 1,322233557  | 5,722197731  | 1,05E-08  | 4,08E-08   | 9,97E-09   | TRUE |
| Rv3674c | 816  | 329  | 1,310481568  | 0,820342128  | 9,223853013  | 2,87E-20  | 2,12E-19   | 5,17E-20   | TRUE |
| Rv3675  | 29   | 75   | -1,370837695 | -1,860977135 | -6,274200227 | 3,51E-10  | 1,53E-09   | 3,73E-10   | TRUE |
| Rv3677c | 61   | 18   | 1,760812336  | 1,270672896  | 3,611020132  | 0,000305  | 0,00073473 | 0,00017954 | TRUE |
| Rv3679  | 3754 | 1361 | 1,463761583  | 0,973622143  | 22,91267801  | 3,47E-116 | 1,52E-114  | 3,72E-115  | TRUE |
| Rv3680  | 452  | 552  | -0,288345494 | -0,778484934 | -8,594207095 | 8,38E-18  | 5,53E-17   | 1,35E-17   | TRUE |
| Rv3682  | 184  | 356  | -0,952171475 | -1,442310915 | -11,39426578 | 4,47E-30  | 4,66E-29   | 1,14E-29   | TRUE |
| Rv3683  | 42   | 92   | -1,131244533 | -1,621383973 | -6,311109043 | 2,77E-10  | 1,22E-09   | 2,97E-10   | TRUE |
| Rv3684  | 31   | 65   | -1,068171503 | -1,558310943 | -5,15435709  | 2,55E-07  | 8,80E-07   | 2,15E-07   | TRUE |
| Rv3685c | 31   | 61   | -0,976541027 | -1,466680467 | -4,774845093 | 1,80E-06  | 5,74E-06   | 1,40E-06   | TRUE |
| Rv3686c | 21   | 217  | -3,36923381  | -3,85937325  | -15,65488295 | 3,08E-55  | 5,72E-54   | 1,40E-54   | TRUE |
| Rv3687c | 36   | 8    | 2,169925001  | 1,679785561  | 3,416167737  | 0,000635  | 0,00145031 | 0,00035439 | TRUE |
| Rv3694c | 119  | 130  | -0,12755005  | -0,61768949  | -3,40122539  | 0,000671  | 0,00152571 | 0,00037282 | TRUE |
| Rv3695  | 25   | 48   | -0,941106311 | -1,431245751 | -4,158683376 | 3,20E-05  | 8,70E-05   | 2,13E-05   | TRUE |
| Rv3697A | 33   | 67   | -1,021695071 | -1,511834511 | -5,11804571  | 3,09E-07  | 1,06E-06   | 2,59E-07   | TRUE |
| Rv3699  | 93   | 31   | 1,584962501  | 1,094823061  | 3,96060251   | 7,48E-05  | 0,00019398 | 4,74E-05   | TRUE |
| Rv3703c | 28   | 65   | -1,215012891 | -1,705152331 | -5,498338853 | 3,83E-08  | 1,42E-07   | 3,46E-08   | TRUE |
| Rv3704c | 29   | 153  | -2,399406848 | -2,889546288 | -11,64299837 | 2,49E-31  | 2,67E-30   | 6,51E-31   | TRUE |
| Rv3705A | 22   | 2    | 3,459431619  | 2,969292179  | 3,775269792  | 0,00016   | 0,00040113 | 9,79E-05   | TRUE |
| Rv3708c | 18   | 37   | -1,039528364 | -1,529667804 | -3,836254947 | 0,000125  | 0,00031719 | 7,74E-05   | TRUE |
| Rv3709c | 46   | 185  | -2,007819504 | -2,497958945 | -11,84523646 | 2,28E-32  | 2,46E-31   | 6,02E-32   | TRUE |
| Rv3710  | 327  | 112  | 1,545791903  | 1,055652463  | 7,210902033  | 5,56E-13  | 2,83E-12   | 6,91E-13   | TRUE |
| Rv3711c | 80   | 8    | 3,321928095  | 2,831788655  | 7,031489731  | 2,04E-12  | 1,01E-11   | 2,46E-12   | TRUE |
| Rv3717  | 9    | 51   | -2,502500341 | -2,992639781 | -6,838284007 | 8,01E-12  | 3,83E-11   | 9,36E-12   | TRUE |
| Rv3720  | 78   | 177  | -1,182203331 | -1,672342771 | -8,950171103 | 3,55E-19  | 2,50E-18   | 6,11E-19   | TRUE |
| Rv3722c | 152  | 67   | 1,181838323  | 0,691698883  | 3,430656146  | 0,000602  | 0,00138068 | 0,00033738 | TRUE |
| Rv3723  | 84   | 131  | -0,641105579 | -1,131245019 | -5,720406606 | 1,06E-08  | 4,12E-08   | 1,01E-08   | TRUE |
| Rv3724B | 33   | 3    | 3,459431619  | 2,969292179  | 4,623760527  | 3,77E-06  | 1,15E-05   | 2,81E-06   | TRUE |

|         |     |     |              |              |              |          |            |            |      |
|---------|-----|-----|--------------|--------------|--------------|----------|------------|------------|------|
| Rv3725  | 61  | 126 | -1,046542586 | -1,536682026 | -7,10367024  | 1,21E-12 | 6,06E-12   | 1,48E-12   | TRUE |
| Rv3728  | 32  | 86  | -1,426264755 | -1,916404195 | -6,852589949 | 7,25E-12 | 3,47E-11   | 8,49E-12   | TRUE |
| Rv3731  | 48  | 92  | -0,938599455 | -1,428738895 | -5,750066621 | 8,92E-09 | 3,49E-08   | 8,52E-09   | TRUE |
| Rv3733c | 75  | 21  | 1,836501268  | 1,346361828  | 4,18726904   | 2,82E-05 | 7,75E-05   | 1,89E-05   | TRUE |
| Rv3735  | 106 | 24  | 2,142957954  | 1,652818514  | 5,795073222  | 6,83E-09 | 2,70E-08   | 6,59E-09   | TRUE |
| Rv3736  | 88  | 25  | 1,815575429  | 1,325435989  | 4,48143486   | 7,41E-06 | 2,17E-05   | 5,30E-06   | TRUE |
| Rv3737  | 46  | 11  | 2,064130337  | 1,573990897  | 3,68535998   | 0,000228 | 0,00056054 | 0,00013697 | TRUE |
| Rv3740c | 95  | 167 | -0,813848684 | -1,303988124 | -7,225652835 | 4,99E-13 | 2,55E-12   | 6,24E-13   | TRUE |
| Rv3743c | 168 | 15  | 3,485426827  | 2,995287387  | 10,47714591  | 1,10E-25 | 9,94E-25   | 2,43E-25   | TRUE |
| Rv3746c | 59  | 14  | 2,075288127  | 1,585148687  | 4,195254465  | 2,73E-05 | 7,50E-05   | 1,83E-05   | TRUE |
| Rv3749c | 136 | 38  | 1,839535328  | 1,349395888  | 5,648531497  | 1,62E-08 | 6,16E-08   | 1,51E-08   | TRUE |
| Rv3750c | 327 | 114 | 1,520256811  | 1,030117371  | 7,06769705   | 1,58E-12 | 7,81E-12   | 1,91E-12   | TRUE |
| Rv3751  | 23  | 2   | 3,523561956  | 3,033422516  | 3,899907717  | 9,62E-05 | 0,00024706 | 6,03E-05   | TRUE |
| Rv3757c | 2   | 37  | -4,209453366 | -4,699592806 | -6,804575943 | 1,01E-11 | 4,83E-11   | 1,18E-11   | TRUE |
| Rv3762c | 19  | 34  | -0,839535328 | -1,329674768 | -3,30936854  | 0,000935 | 0,00205599 | 0,00050239 | TRUE |
| Rv3763  | 41  | 146 | -1,832272554 | -2,322411994 | -10,08536956 | 6,41E-24 | 5,56E-23   | 1,36E-23   | TRUE |
| Rv3764c | 57  | 122 | -1,097847323 | -1,587986763 | -7,159406615 | 8,10E-13 | 4,09E-12   | 9,99E-13   | TRUE |
| Rv3765c | 87  | 263 | -1,595975493 | -2,086114933 | -12,6681581  | 8,88E-37 | 1,11E-35   | 2,72E-36   | TRUE |
| Rv3767c | 74  | 170 | -1,199937571 | -1,690077011 | -8,837165209 | 9,82E-19 | 6,86E-18   | 1,68E-18   | TRUE |
| Rv3768  | 24  | 0   | 5,584962501  | 5,094823061  | 4,681172797  | 2,85E-06 | 8,86E-06   | 2,17E-06   | TRUE |
| Rv3769  | 43  | 5   | 3,10433666   | 2,61419722   | 4,941786677  | 7,74E-07 | 2,56E-06   | 6,26E-07   | TRUE |
| Rv3770A | 2   | 18  | -3,169925001 | -3,660064441 | -4,425842147 | 9,61E-06 | 2,78E-05   | 6,80E-06   | TRUE |
| Rv3774  | 78  | 95  | -0,284453389 | -0,77459283  | -3,548141174 | 0,000388 | 0,00092208 | 0,00022532 | TRUE |
| Rv3776  | 31  | 1   | 4,95419631   | 4,46405687   | 5,199977714  | 1,99E-07 | 6,95E-07   | 1,70E-07   | TRUE |
| Rv3779  | 70  | 17  | 2,041820176  | 1,551680736  | 4,49920072   | 6,82E-06 | 2,00E-05   | 4,90E-06   | TRUE |
| Rv3780  | 120 | 139 | -0,212050477 | -0,702189917 | -3,940022347 | 8,15E-05 | 0,0002107  | 5,15E-05   | TRUE |
| Rv3781  | 47  | 174 | -1,888354644 | -2,378494084 | -11,16706293 | 5,91E-29 | 6,04E-28   | 1,48E-28   | TRUE |
| Rv3783  | 10  | 63  | -2,655351829 | -3,145491269 | -7,779739137 | 7,27E-15 | 4,17E-14   | 1,02E-14   | TRUE |
| Rv3785  | 38  | 81  | -1,091922489 | -1,582061929 | -5,817651694 | 5,97E-09 | 2,37E-08   | 5,80E-09   | TRUE |
| Rv3791  | 3   | 20  | -2,736965594 | -3,227105034 | -4,433874302 | 9,26E-06 | 2,69E-05   | 6,56E-06   | TRUE |
| Rv3797  | 32  | 6   | 2,415037499  | 1,924898059  | 3,537273632  | 0,000404 | 0,00095738 | 0,0002338  | TRUE |
| Rv3799c | 153 | 554 | -1,856354323 | -2,346493763 | -19,77189836 | 5,20E-87 | 1,59E-85   | 3,88E-86   | TRUE |
| Rv3800c | 670 | 897 | -0,42094689  | -0,91108633  | -12,53444131 | 4,84E-36 | 5,76E-35   | 1,41E-35   | TRUE |
| Rv3804c | 172 | 292 | -0,763559804 | -1,253699244 | -9,267556961 | 1,90E-20 | 1,42E-19   | 3,47E-20   | TRUE |
| Rv3815c | 19  | 141 | -2,891623839 | -3,381763279 | -12,01134236 | 3,10E-33 | 3,41E-32   | 8,33E-33   | TRUE |
| Rv3821  | 49  | 10  | 2,292781749  | 1,802642309  | 4,186956655  | 2,83E-05 | 7,74E-05   | 1,89E-05   | TRUE |
| Rv3823c | 111 | 145 | -0,385493224 | -0,875632664 | -4,869547478 | 1,12E-06 | 3,65E-06   | 8,92E-07   | TRUE |

|         |      |      |              |              |              |           |            |            |      |
|---------|------|------|--------------|--------------|--------------|-----------|------------|------------|------|
| Rv3824c | 51   | 78   | -0,612976877 | -1,103116317 | -4,325123386 | 1,52E-05  | 4,30E-05   | 1,05E-05   | TRUE |
| Rv3825c | 490  | 1352 | -1,464241497 | -1,954380937 | -27,5518676  | 4,20E-167 | 3,16E-165  | 7,71E-166  | TRUE |
| Rv3830c | 39   | 3    | 3,700439718  | 3,210300278  | 5,212261173  | 1,87E-07  | 6,53E-07   | 1,60E-07   | TRUE |
| Rv3831  | 13   | 0    | 4,700439718  | 4,210300278  | 3,318724439  | 0,000904  | 0,00199507 | 0,00048723 | TRUE |
| Rv3832c | 27   | 1    | 4,754887502  | 4,264748062  | 4,799162662  | 1,59E-06  | 5,12E-06   | 1,25E-06   | TRUE |
| Rv3833  | 107  | 0    | 7,741466986  | 7,251327546  | 9,681401011  | 3,62E-22  | 2,88E-21   | 7,03E-22   | TRUE |
| Rv3835  | 58   | 12   | 2,273018494  | 1,782879054  | 4,52081013   | 6,16E-06  | 1,82E-05   | 4,44E-06   | TRUE |
| Rv3837c | 245  | 88   | 1,47720632   | 0,98706688   | 5,90558569   | 3,51E-09  | 1,42E-08   | 3,48E-09   | TRUE |
| Rv3840  | 16   | 1    | 4            | 3,50986056   | 3,465376216  | 0,000529  | 0,00122564 | 0,00029914 | TRUE |
| Rv3841  | 910  | 46   | 4,306160779  | 3,816021339  | 26,95222411  | 5,37E-160 | 3,56E-158  | 8,69E-159  | TRUE |
| Rv3844  | 36   | 6    | 2,584962501  | 2,094823061  | 3,964576773  | 7,35E-05  | 0,00019122 | 4,67E-05   | TRUE |
| Rv3846  | 28   | 71   | -1,342392197 | -1,832531637 | -6,040975028 | 1,53E-09  | 6,34E-09   | 1,55E-09   | TRUE |
| Rv3847  | 91   | 128  | -0,49220536  | -0,9823448   | -5,03861211  | 4,69E-07  | 1,58E-06   | 3,85E-07   | TRUE |
| Rv3848  | 43   | 10   | 2,10433666   | 1,61419722   | 3,628798656  | 0,000285  | 0,00069171 | 0,00016897 | TRUE |
| Rv3849  | 23   | 3    | 2,938599455  | 2,448460015  | 3,483678286  | 0,000495  | 0,0011513  | 0,00028124 | TRUE |
| Rv3852  | 8    | 121  | -3,918863237 | -4,409002677 | -12,14097924 | 6,41E-34  | 7,23E-33   | 1,77E-33   | TRUE |
| Rv3854c | 1279 | 71   | 4,171053429  | 3,680913989  | 31,5552646   | 1,52E-218 | 1,69E-216  | 4,14E-217  | TRUE |
| Rv3855  | 323  | 7    | 5,528035433  | 5,037895993  | 17,1505215   | 6,23E-66  | 1,39E-64   | 3,40E-65   | TRUE |
| Rv3858c | 119  | 447  | -1,909313258 | -2,399452698 | -17,9938153  | 2,18E-72  | 5,35E-71   | 1,31E-71   | TRUE |
| Rv3862c | 157  | 10   | 3,972692654  | 3,482553214  | 10,82235008  | 2,70E-27  | 2,63E-26   | 6,44E-27   | TRUE |
| Rv3863  | 464  | 99   | 2,228624375  | 1,738484935  | 12,56748149  | 3,19E-36  | 3,84E-35   | 9,39E-36   | TRUE |
| Rv3864  | 636  | 89   | 2,837149524  | 2,347010084  | 17,87631245  | 1,80E-71  | 4,30E-70   | 1,05E-70   | TRUE |
| Rv3865  | 350  | 173  | 1,016582884  | 0,526443444  | 4,077891501  | 4,54E-05  | 0,00012164 | 2,97E-05   | TRUE |
| Rv3866  | 401  | 61   | 2,716721089  | 2,226581649  | 13,74884827  | 5,17E-43  | 7,71E-42   | 1,88E-42   | TRUE |
| Rv3867  | 185  | 51   | 1,858956119  | 1,368816679  | 6,66053834   | 2,73E-11  | 1,27E-10   | 3,11E-11   | TRUE |
| Rv3868  | 756  | 325  | 1,217946516  | 0,727807076  | 8,003902941  | 1,21E-15  | 7,12E-15   | 1,74E-15   | TRUE |
| Rv3871  | 340  | 638  | -0,908021678 | -1,398161118 | -14,90393386 | 3,11E-50  | 5,32E-49   | 1,30E-49   | TRUE |
| Rv3872  | 557  | 97   | 2,521620675  | 2,031481235  | 15,29388863  | 8,40E-53  | 1,52E-51   | 3,71E-52   | TRUE |
| Rv3873  | 1427 | 120  | 3,571879024  | 3,081739584  | 30,96272852  | 1,71E-210 | 1,81E-208  | 4,42E-209  | TRUE |
| Rv3874  | 1907 | 825  | 1,208838819  | 0,718699379  | 12,58417443  | 2,58E-36  | 3,15E-35   | 7,69E-36   | TRUE |
| Rv3875  | 3834 | 1370 | 1,484674444  | 0,994535004  | 23,56822555  | 8,16E-123 | 3,80E-121  | 9,28E-122  | TRUE |
| Rv3876  | 412  | 57   | 2,853610513  | 2,363471073  | 14,44610687  | 2,65E-47  | 4,35E-46   | 1,06E-46   | TRUE |
| Rv3877  | 189  | 24   | 2,977279923  | 2,487140483  | 10,07701217  | 6,98E-24  | 6,05E-23   | 1,48E-23   | TRUE |
| Rv3878  | 199  | 73   | 1,446800062  | 0,956660622  | 5,185522439  | 2,15E-07  | 7,50E-07   | 1,83E-07   | TRUE |
| Rv3880c | 96   | 32   | 1,584962501  | 1,094823061  | 4,023984452  | 5,72E-05  | 0,00015129 | 3,70E-05   | TRUE |
| Rv3881c | 617  | 143  | 2,109255342  | 1,619115902  | 13,78049915  | 3,34E-43  | 5,04E-42   | 1,23E-42   | TRUE |
| Rv3888c | 32   | 5    | 2,678071905  | 2,187932465  | 3,841482865  | 0,000122  | 0,00031111 | 7,60E-05   | TRUE |

|         |     |     |              |              |              |          |            |            |       |
|---------|-----|-----|--------------|--------------|--------------|----------|------------|------------|-------|
| Rv3889c | 64  | 5   | 3,678071905  | 3,187932465  | 6,656321672  | 2,81E-11 | 1,31E-10   | 3,19E-11   | TRUE  |
| Rv3892c | 33  | 6   | 2,459431619  | 1,969292179  | 3,646801958  | 0,000266 | 0,00064784 | 0,00015816 | TRUE  |
| Rv3894c | 111 | 131 | -0,239007135 | -0,729146575 | -3,953248136 | 7,71E-05 | 0,00019978 | 4,88E-05   | TRUE  |
| Rv3895c | 84  | 13  | 2,691877705  | 2,201738265  | 6,248371766  | 4,15E-10 | 1,80E-09   | 4,39E-10   | TRUE  |
| Rv3898c | 24  | 2   | 3,584962501  | 3,094823061  | 4,021408351  | 5,79E-05 | 0,0001528  | 3,73E-05   | TRUE  |
| Rv3899c | 25  | 4   | 2,64385619   | 2,15371675   | 3,362189686  | 0,000773 | 0,00174293 | 0,00042553 | TRUE  |
| Rv3900c | 61  | 10  | 2,608809243  | 2,118669803  | 5,198007979  | 2,01E-07 | 7,02E-07   | 1,71E-07   | TRUE  |
| Rv3905c | 31  | 64  | -1,04580369  | -1,53594313  | -5,060716323 | 4,18E-07 | 1,41E-06   | 3,44E-07   | TRUE  |
| Rv3907c | 23  | 65  | -1,498805857 | -1,988945297 | -6,105644962 | 1,02E-09 | 4,29E-09   | 1,05E-09   | TRUE  |
| Rv3909  | 87  | 15  | 2,5360529    | 2,04591346   | 6,070675058  | 1,27E-09 | 5,29E-09   | 1,29E-09   | TRUE  |
| Rv3913  | 545 | 155 | 1,813988014  | 1,323848574  | 11,14547992  | 7,53E-29 | 7,66E-28   | 1,87E-28   | TRUE  |
| Rv3914  | 112 | 13  | 3,106915204  | 2,616775764  | 7,980038758  | 1,46E-15 | 8,60E-15   | 2,10E-15   | TRUE  |
| Rv3915  | 331 | 463 | -0,484180976 | -0,974320416 | -9,521042472 | 1,71E-21 | 1,33E-20   | 3,26E-21   | TRUE  |
| Rv3916c | 339 | 152 | 1,15721395   | 0,66707451   | 4,962845259  | 6,95E-07 | 2,31E-06   | 5,64E-07   | TRUE  |
| Rv3918c | 50  | 66  | -0,40053793  | -0,89067737  | -3,332782708 | 0,00086  | 0,0019148  | 0,00046776 | TRUE  |
| Rv3921c | 133 | 352 | -1,404149183 | -1,894288623 | -13,75893472 | 4,50E-43 | 6,73E-42   | 1,65E-42   | TRUE  |
| Rv3923c | 128 | 140 | -0,129283017 | -0,619422457 | -3,538498081 | 0,000402 | 0,00095411 | 0,00023314 | TRUE  |
| Rv3924c | 128 | 491 | -1,939579214 | -2,429718654 | -18,99707111 | 1,80E-80 | 4,89E-79   | 1,19E-79   | TRUE  |
| Rv0002  | 59  | 27  | 1,127755547  | 0,637616107  | 1,98866796   | 0,046738 | 0,0724539  | 0,01770455 | FALSE |
| Rv0004  | 11  | 13  | -0,2410081   | -0,73114754  | -1,248169793 | 0,211969 | 0,27697457 | 0,06766909 | FALSE |
| Rv0008c | 13  | 7   | 0,893084796  | 0,402945356  | 0,614383992  | 0,538962 | 0,61557329 | 0,15037508 | FALSE |
| Rv0010c | 42  | 14  | 1,584962501  | 1,094823061  | 2,661516989  | 0,007779 | 0,01450657 | 0,00354477 | FALSE |
| Rv0011c | 44  | 15  | 1,552541023  | 1,062401583  | 2,658376023  | 0,007852 | 0,01462154 | 0,00357286 | FALSE |
| Rv0012  | 53  | 45  | 0,236067358  | -0,254072082 | -0,876562118 | 0,380725 | 0,45745516 | 0,11164947 | FALSE |
| Rv0013  | 21  | 4   | 2,392317423  | 1,902177983  | 2,842851455  | 0,004471 | 0,00876506 | 0,00214072 | FALSE |
| Rv0018c | 144 | 70  | 1,040641984  | 0,550502544  | 2,723357879  | 0,006462 | 0,01223807 | 0,00299045 | FALSE |
| Rv0020c | 253 | 190 | 0,413137966  | -0,077001474 | -0,563000961 | 0,573434 | 0,64943755 | 0,15869399 | FALSE |
| Rv0022c | 5   | 0   | 3,321928095  | 2,831788655  | 1,757822924  | 0,078778 | 0,11610745 | 0,02833413 | FALSE |
| Rv0025  | 23  | 24  | -0,061400545 | -0,551539985 | -1,319782477 | 0,186908 | 0,24800353 | 0,06060116 | FALSE |
| Rv0027  | 30  | 10  | 1,584962501  | 1,094823061  | 2,2493739    | 0,024489 | 0,04062381 | 0,00992246 | FALSE |
| Rv0031  | 1   | 1   | 0            | -0,49013944  | -0,241962819 | 0,808809 | 0,84800619 | 0,20685444 | FALSE |
| Rv0032  | 18  | 5   | 1,847996907  | 1,357857467  | 2,064658238  | 0,038955 | 0,06181253 | 0,015092   | FALSE |
| Rv0033  | 2   | 1   | 1            | 0,50986056   | 0,29932164   | 0,764695 | 0,81465901 | 0,19872219 | FALSE |
| Rv0034  | 4   | 1   | 2            | 1,50986056   | 1,054098848  | 0,291838 | 0,3631117  | 0,08848889 | FALSE |
| Rv0036c | 9   | 7   | 0,362570079  | -0,127569361 | -0,1774247   | 0,859175 | 0,88805654 | 0,2165029  | FALSE |
| Rv0037c | 44  | 16  | 1,459431619  | 0,969292179  | 2,464847336  | 0,013707 | 0,02424755 | 0,00592369 | FALSE |
| Rv0040c | 21  | 11  | 0,932885804  | 0,442746364  | 0,852107338  | 0,394155 | 0,47019197 | 0,1148767  | FALSE |

|         |     |     |              |              |              |          |            |            |       |
|---------|-----|-----|--------------|--------------|--------------|----------|------------|------------|-------|
| Rv0042c | 10  | 12  | -0,263034406 | -0,753173846 | -1,230621959 | 0,218464 | 0,28197093 | 0,06888992 | FALSE |
| Rv0044c | 7   | 2   | 1,807354922  | 1,317215482  | 1,257822137  | 0,208456 | 0,27274955 | 0,06661452 | FALSE |
| Rv0046c | 438 | 326 | 0,426058905  | -0,064080535 | -0,615208725 | 0,538417 | 0,61531107 | 0,15035498 | FALSE |
| Rv0050  | 104 | 70  | 0,571156701  | 0,081017261  | 0,369473146  | 0,711775 | 0,77444461 | 0,18924023 | FALSE |
| Rv0051  | 20  | 22  | -0,137503524 | -0,627642964 | -1,419106929 | 0,155868 | 0,21068326 | 0,05148173 | FALSE |
| Rv0052  | 6   | 4   | 0,584962501  | 0,094823061  | 0,10360907   | 0,91748  | 0,9353238  | 0,22834339 | FALSE |
| Rv0053  | 15  | 14  | 0,099535674  | -0,390603766 | -0,734052619 | 0,462917 | 0,54057703 | 0,13205378 | FALSE |
| Rv0054  | 24  | 23  | 0,061400545  | -0,428738895 | -1,025931205 | 0,304924 | 0,37693203 | 0,09210562 | FALSE |
| Rv0055  | 65  | 38  | 0,77444403   | 0,28430086   | 0,989478842  | 0,322429 | 0,395131   | 0,0965375  | FALSE |
| Rv0056  | 66  | 28  | 1,237039197  | 0,746899757  | 2,417622282  | 0,015622 | 0,02730753 | 0,00667004 | FALSE |
| Rv0057  | 30  | 15  | 1            | 0,50986056   | 1,159294982  | 0,246336 | 0,31405222 | 0,07674056 | FALSE |
| Rv0059  | 9   | 5   | 0,847996907  | 0,357857467  | 0,457556932  | 0,647271 | 0,71694581 | 0,1750659  | FALSE |
| Rv0060  | 142 | 79  | 0,845966371  | 0,355826931  | 1,808009766  | 0,070605 | 0,10535439 | 0,02574398 | FALSE |
| Rv0061c | 105 | 113 | -0,105933445 | -0,596072885 | -3,071503067 | 0,00213  | 0,00443811 | 0,00108448 | FALSE |
| Rv0062  | 5   | 4   | 0,321928095  | -0,168211345 | -0,175607701 | 0,860602 | 0,88718358 | 0,2165029  | FALSE |
| Rv0063  | 8   | 16  | -1           | -1,49013944  | -2,474364667 | 0,013347 | 0,02364316 | 0,00577604 | FALSE |
| Rv0064A | 28  | 20  | 0,485426827  | -0,004712613 | -0,011317472 | 0,99097  | 0,99351437 | 0,24277125 | FALSE |
| Rv0065  | 39  | 11  | 1,8259706    | 1,33583116   | 3,001269837  | 0,002689 | 0,00550542 | 0,00134528 | FALSE |
| Rv0066c | 111 | 49  | 1,179706022  | 0,689566582  | 2,923630455  | 0,00346  | 0,00693905 | 0,0016956  | FALSE |
| Rv0068  | 24  | 8   | 1,584962501  | 1,094823061  | 2,011892903  | 0,044231 | 0,06908918 | 0,01688236 | FALSE |
| Rv0069c | 22  | 5   | 2,137503524  | 1,647364084  | 2,633732374  | 0,008445 | 0,01556324 | 0,0037976  | FALSE |
| Rv0071  | 2   | 7   | -1,807354922 | -2,297494362 | -2,193900169 | 0,028243 | 0,04620331 | 0,01129006 | FALSE |
| Rv0074  | 38  | 12  | 1,662965013  | 1,172825573  | 2,675556456  | 0,007461 | 0,01401317 | 0,00342256 | FALSE |
| Rv0078B | 224 | 195 | 0,200024608  | -0,290114832 | -2,070984596 | 0,03836  | 0,06106674 | 0,01492203 | FALSE |
| Rv0081  | 39  | 35  | 0,156119202  | -0,334020238 | -1,00231324  | 0,316192 | 0,38815814 | 0,09484879 | FALSE |
| Rv0082  | 5   | 8   | -0,678071905 | -1,168211345 | -1,4503344   | 0,146965 | 0,20136823 | 0,04918829 | FALSE |
| Rv0083  | 15  | 9   | 0,736965594  | 0,246826154  | 0,415345089  | 0,677889 | 0,7419164  | 0,1811902  | FALSE |
| Rv0084  | 17  | 25  | -0,556393349 | -1,046532789 | -2,345790229 | 0,018987 | 0,03241242 | 0,00791844 | FALSE |
| Rv0085  | 1   | 1   | 0            | -0,49013944  | -0,241962819 | 0,808809 | 0,84800619 | 0,20685444 | FALSE |
| Rv0086  | 11  | 4   | 1,459431619  | 0,969292179  | 1,232394544  | 0,217802 | 0,28246954 | 0,06881664 | FALSE |
| Rv0088  | 90  | 102 | -0,180572246 | -0,670711686 | -3,241338814 | 0,00119  | 0,00257812 | 0,00062998 | FALSE |
| Rv0089  | 14  | 6   | 1,222392421  | 0,732252981  | 1,094369965  | 0,273793 | 0,34539192 | 0,08427609 | FALSE |
| Rv0090  | 7   | 9   | -0,362570079 | -0,852709519 | -1,18595664  | 0,235639 | 0,30144863 | 0,07364873 | FALSE |
| Rv0091  | 17  | 4   | 2,087462841  | 1,597323401  | 2,264398215  | 0,02355  | 0,03928292 | 0,00958673 | FALSE |
| Rv0093c | 17  | 15  | 0,180572246  | -0,309567194 | -0,610698257 | 0,541399 | 0,6177252  | 0,15087876 | FALSE |
| Rv0094c | 6   | 1   | 2,584962501  | 2,094823061  | 1,61850815   | 0,105553 | 0,14972211 | 0,03655894 | FALSE |
| Rv0096  | 15  | 7   | 1,099535674  | 0,609396234  | 0,963010104  | 0,335542 | 0,40946665 | 0,09996325 | FALSE |

|         |     |      |              |              |              |          |            |            |       |
|---------|-----|------|--------------|--------------|--------------|----------|------------|------------|-------|
| Rv0098  | 10  | 20   | -1           | -1,49013944  | -2,76643309  | 0,005667 | 0,01080082 | 0,00263925 | FALSE |
| Rv0104  | 16  | 20   | -0,321928095 | -0,812067535 | -1,6955763   | 0,089966 | 0,12970936 | 0,03168942 | FALSE |
| Rv0105c | 2   | 0 NA |              | NA           | NA           | NA       | NA         | NA         | FALSE |
| Rv0107c | 78  | 34   | 1,197939378  | 0,707799938  | 2,507603853  | 0,012155 | 0,02180358 | 0,00532784 | FALSE |
| Rv0109  | 5   | 2    | 1,321928095  | 0,831788655  | 0,730202124  | 0,465267 | 0,54186288 | 0,13217096 | FALSE |
| Rv0111  | 34  | 10   | 1,765534746  | 1,275395306  | 2,703662777  | 0,006858 | 0,01294992 | 0,00316286 | FALSE |
| Rv0112  | 31  | 9    | 1,784271309  | 1,294131869  | 2,611058884  | 0,009026 | 0,01649389 | 0,0040285  | FALSE |
| Rv0113  | 17  | 3    | 2,502500341  | 2,0123609    | 2,654792404  | 0,007936 | 0,01474613 | 0,00359903 | FALSE |
| Rv0114  | 17  | 3    | 2,502500341  | 2,0123609    | 2,654792404  | 0,007936 | 0,01474613 | 0,00359903 | FALSE |
| Rv0115  | 11  | 9    | 0,289506617  | -0,200632823 | -0,312423996 | 0,754718 | 0,80755584 | 0,19727933 | FALSE |
| Rv0117  | 22  | 11   | 1            | 0,50986056   | 0,992754242  | 0,32083  | 0,39335639 | 0,09611901 | FALSE |
| Rv0119  | 5   | 4    | 0,321928095  | -0,168211345 | -0,175607701 | 0,860602 | 0,88718358 | 0,2165029  | FALSE |
| Rv0121c | 14  | 11   | 0,347923303  | -0,142216137 | -0,24732267  | 0,804659 | 0,84729446 | 0,20685444 | FALSE |
| Rv0122  | 36  | 19   | 0,921997488  | 0,431858048  | 1,090302479  | 0,27558  | 0,34680619 | 0,08471689 | FALSE |
| Rv0123  | 35  | 14   | 1,321928095  | 0,831788655  | 1,931976758  | 0,053362 | 0,0821688  | 0,02007844 | FALSE |
| Rv0124  | 7   | 19   | -1,440572591 | -1,930712031 | -3,23679228  | 0,001209 | 0,00260581 | 0,00063657 | FALSE |
| Rv0128  | 58  | 56   | 0,050626073  | -0,439513367 | -1,638075652 | 0,101406 | 0,1446275  | 0,03525992 | FALSE |
| Rv0129c | 62  | 31   | 1            | 0,50986056   | 1,666636327  | 0,095587 | 0,13682779 | 0,0334347  | FALSE |
| Rv0130  | 18  | 2    | 3,169925001  | 2,679785561  | 3,240464224  | 0,001193 | 0,00258246 | 0,00063051 | FALSE |
| Rv0131c | 19  | 12   | 0,662965013  | 0,172825573  | 0,331533923  | 0,740241 | 0,79478745 | 0,19421112 | FALSE |
| Rv0132c | 24  | 4    | 2,584962501  | 2,094823061  | 3,237044548  | 0,001208 | 0,00260782 | 0,00063657 | FALSE |
| Rv0133  | 55  | 49   | 0,166649869  | -0,323489571 | -1,150681733 | 0,249863 | 0,31823737 | 0,07776323 | FALSE |
| Rv0137c | 70  | 33   | 1,084888898  | 0,594749458  | 2,035589989  | 0,041792 | 0,06576505 | 0,01606477 | FALSE |
| Rv0140  | 651 | 412  | 0,660013206  | 0,169873766  | 1,909596389  | 0,056185 | 0,08593937 | 0,0209998  | FALSE |
| Rv0145  | 287 | 227  | 0,338358439  | -0,151781001 | -1,197442014 | 0,231134 | 0,29660845 | 0,07247807 | FALSE |
| Rv0147  | 266 | 159  | 0,74239948   | 0,25226004   | 1,786293037  | 0,074052 | 0,11007704 | 0,02689799 | FALSE |
| Rv0148  | 211 | 132  | 0,676705069  | 0,186565629  | 1,190036515  | 0,234032 | 0,29963774 | 0,0732183  | FALSE |
| Rv0150c | 1   | 2    | -1           | -1,49013944  | -0,874809733 | 0,381677 | 0,45754425 | 0,11164947 | FALSE |
| Rv0151c | 16  | 5    | 1,678071905  | 1,187932465  | 1,753869718  | 0,079453 | 0,11664034 | 0,02845898 | FALSE |
| Rv0152c | 10  | 5    | 1            | 0,50986056   | 0,66930803   | 0,503299 | 0,57899031 | 0,14141729 | FALSE |
| Rv0153c | 4   | 7    | -0,807354922 | -1,297494362 | -1,473418725 | 0,140638 | 0,19351375 | 0,0472696  | FALSE |
| Rv0154c | 30  | 20   | 0,584962501  | 0,094823061  | 0,231682315  | 0,816785 | 0,85133979 | 0,20799309 | FALSE |
| Rv0156  | 7   | 0    | 3,807354922  | 3,317215482  | 2,239856154  | 0,0251   | 0,04146215 | 0,01011869 | FALSE |
| Rv0157  | 42  | 13   | 1,691877705  | 1,201738265  | 2,867798083  | 0,004133 | 0,00816021 | 0,001994   | FALSE |
| Rv0157A | 3   | 5    | -0,736965594 | -1,227105034 | -1,192161297 | 0,233198 | 0,29881484 | 0,07298129 | FALSE |
| Rv0158  | 44  | 21   | 1,067114196  | 0,576974756  | 1,570431329  | 0,116315 | 0,16332589 | 0,03990967 | FALSE |
| Rv0159c | 21  | 18   | 0,222392421  | -0,267747019 | -0,582822205 | 0,560013 | 0,63626731 | 0,15543054 | FALSE |

|         |     |     |              |              |              |          |            |            |       |
|---------|-----|-----|--------------|--------------|--------------|----------|------------|------------|-------|
| Rv0161  | 10  | 10  | 0            | -0,49013944  | -0,765161793 | 0,444175 | 0,52001325 | 0,12703664 | FALSE |
| Rv0162c | 13  | 12  | 0,115477217  | -0,374662223 | -0,653666104 | 0,513327 | 0,58905134 | 0,14389597 | FALSE |
| Rv0163  | 5   | 2   | 1,321928095  | 0,831788655  | 0,730202124  | 0,465267 | 0,54186288 | 0,13217096 | FALSE |
| Rv0167  | 54  | 20  | 1,432959407  | 0,942819967  | 2,668272179  | 0,007624 | 0,01426578 | 0,00348578 | FALSE |
| Rv0168  | 11  | 24  | -1,125530882 | -1,615670322 | -3,215071071 | 0,001304 | 0,00279429 | 0,00068261 | FALSE |
| Rv0169  | 15  | 16  | -0,093109404 | -0,583248844 | -1,133295478 | 0,25709  | 0,32712193 | 0,07993422 | FALSE |
| Rv0176  | 35  | 17  | 1,041820176  | 0,551680736  | 1,345110953  | 0,178589 | 0,23781471 | 0,05810156 | FALSE |
| Rv0177  | 55  | 65  | -0,2410081   | -0,73114754  | -2,791151054 | 0,005252 | 0,01012062 | 0,00247242 | FALSE |
| Rv0178  | 60  | 33  | 0,862496476  | 0,372357036  | 1,226245087  | 0,220106 | 0,28366856 | 0,06931613 | FALSE |
| Rv0179c | 46  | 54  | -0,231325546 | -0,721464986 | -2,514532946 | 0,011919 | 0,02139943 | 0,00522908 | FALSE |
| Rv0180c | 57  | 40  | 0,510961919  | 0,020822479  | 0,071034486  | 0,94337  | 0,95560598 | 0,23342365 | FALSE |
| Rv0182c | 45  | 25  | 0,847996907  | 0,357857467  | 1,023161007  | 0,306232 | 0,3781894  | 0,09241287 | FALSE |
| Rv0183  | 4   | 5   | -0,321928095 | -0,812067535 | -0,847774643 | 0,396563 | 0,47241624 | 0,11533221 | FALSE |
| Rv0184  | 9   | 8   | 0,169925001  | -0,320214439 | -0,460475873 | 0,645175 | 0,71563901 | 0,17479625 | FALSE |
| Rv0187  | 34  | 12  | 1,502500341  | 1,0123609    | 2,246152765  | 0,024694 | 0,0409039  | 0,009993   | FALSE |
| Rv0188  | 235 | 126 | 0,899237023  | 0,409097583  | 2,649742946  | 0,008055 | 0,01493635 | 0,00364979 | FALSE |
| Rv0189c | 42  | 15  | 1,485426827  | 0,995287387  | 2,461642897  | 0,01383  | 0,02438792 | 0,0059553  | FALSE |
| Rv0191  | 107 | 48  | 1,156504486  | 0,666365046  | 2,785055749  | 0,005352 | 0,01029253 | 0,00251442 | FALSE |
| Rv0192  | 54  | 22  | 1,295455884  | 0,805316443  | 2,334086367  | 0,019591 | 0,0331831  | 0,00810673 | FALSE |
| Rv0192A | NA  | NA  | NA           | NA           | NA           | NA       | NA         | NA         | FALSE |
| Rv0193c | 9   | 4   | 1,169925001  | 0,679785561  | 0,82201383   | 0,411069 | 0,48532866 | 0,11853923 | FALSE |
| Rv0196  | 9   | 7   | 0,362570079  | -0,127569361 | -0,1774247   | 0,859175 | 0,88805654 | 0,2165029  | FALSE |
| Rv0199  | 15  | 9   | 0,736965594  | 0,246826154  | 0,415345089  | 0,677889 | 0,7419164  | 0,1811902  | FALSE |
| Rv0200  | 18  | 2   | 3,169925001  | 2,679785561  | 3,240464224  | 0,001193 | 0,00258246 | 0,00063051 | FALSE |
| Rv0201c | 77  | 52  | 0,566346823  | 0,076207383  | 0,299282737  | 0,764724 | 0,8132485  | 0,19872219 | FALSE |
| Rv0202c | 474 | 377 | 0,330322536  | -0,159816904 | -1,622927887 | 0,104605 | 0,14859288 | 0,03630957 | FALSE |
| Rv0203  | 0   | 1   | NA           | NA           | NA           | NA       | NA         | NA         | FALSE |
| Rv0204c | 22  | 4   | 2,459431619  | 1,969292179  | 2,977584745  | 0,002905 | 0,00590433 | 0,00144238 | FALSE |
| Rv0205  | 21  | 5   | 2,070389328  | 1,580249888  | 2,49722024   | 0,012517 | 0,0224063  | 0,00547386 | FALSE |
| Rv0209  | 16  | 16  | 0            | -0,49013944  | -0,967868514 | 0,33311  | 0,40694344 | 0,09942354 | FALSE |
| Rv0210  | 42  | 15  | 1,485426827  | 0,995287387  | 2,461642897  | 0,01383  | 0,02438792 | 0,0059553  | FALSE |
| Rv0213c | 25  | 10  | 1,321928095  | 0,831788655  | 1,632806114  | 0,10251  | 0,14577593 | 0,03562123 | FALSE |
| Rv0216  | 8   | 3   | 1,415037499  | 0,924898059  | 1,01059623   | 0,31221  | 0,38484184 | 0,09391985 | FALSE |
| Rv0219  | 7   | 0   | 3,807354922  | 3,317215482  | 2,239856154  | 0,0251   | 0,04146215 | 0,01011869 | FALSE |
| Rv0220  | 72  | 69  | 0,061400545  | -0,428738895 | -1,77706414  | 0,075558 | 0,11188956 | 0,02734089 | FALSE |
| Rv0221  | 51  | 47  | 0,11783649   | -0,37230295  | -1,286077691 | 0,198416 | 0,26193857 | 0,06394851 | FALSE |
| Rv0222  | 24  | 13  | 0,884522783  | 0,394383343  | 0,818266536  | 0,413205 | 0,48726123 | 0,11904725 | FALSE |



|         |     |     |              |              |              |          |            |            |       |
|---------|-----|-----|--------------|--------------|--------------|----------|------------|------------|-------|
| Rv0224c | 10  | 0   | 4,321928095  | 3,831788655  | 2,828613894  | 0,004675 | 0,00909158 | 0,00221937 | FALSE |
| Rv0225  | 54  | 46  | 0,231325546  | -0,258813894 | -0,902048021 | 0,367031 | 0,44263664 | 0,10816094 | FALSE |
| Rv0226c | 9   | 2   | 2,169925001  | 1,679785561  | 1,708058052  | 0,087626 | 0,12673254 | 0,03093349 | FALSE |
| Rv0228  | 6   | 7   | -0,222392421 | -0,712531861 | -0,895464602 | 0,370539 | 0,44617759 | 0,108959   | FALSE |
| Rv0231  | 18  | 5   | 1,847996907  | 1,357857467  | 2,064658238  | 0,038955 | 0,06181253 | 0,015092   | FALSE |
| Rv0234c | 13  | 8   | 0,700439718  | 0,210300278  | 0,331536929  | 0,740239 | 0,79522231 | 0,19421112 | FALSE |
| Rv0236A | 8   | 0   | 4            | 3,50986056   | 2,450385202  | 0,01427  | 0,02506779 | 0,00612271 | FALSE |
| Rv0237  | 15  | 3   | 2,321928095  | 1,831788655  | 2,342126898  | 0,019174 | 0,03259697 | 0,00795239 | FALSE |
| Rv0242c | 84  | 67  | 0,326228232  | -0,163911208 | -0,700913353 | 0,483357 | 0,55843475 | 0,13645691 | FALSE |
| Rv0245  | 12  | 19  | -0,662965013 | -1,153104453 | -2,212017798 | 0,026965 | 0,04423441 | 0,01080668 | FALSE |
| Rv0254c | 21  | 6   | 1,807354922  | 1,317215482  | 2,178631209  | 0,029359 | 0,04788939 | 0,01169718 | FALSE |
| Rv0255c | 23  | 11  | 1,064130337  | 0,573990897  | 1,130112835  | 0,258429 | 0,32850391 | 0,08021969 | FALSE |
| Rv0256c | 31  | 10  | 1,632268215  | 1,142128775  | 2,365881815  | 0,017987 | 0,03098366 | 0,00756437 | FALSE |
| Rv0257  | 19  | 8   | 1,247927513  | 0,757788073  | 1,313540566  | 0,189001 | 0,25044057 | 0,06117591 | FALSE |
| Rv0259c | 11  | 6   | 0,874469118  | 0,384329678  | 0,540782419  | 0,588658 | 0,66446243 | 0,16234195 | FALSE |
| Rv0261c | 20  | 3   | 2,736965594  | 2,246826154  | 3,087022158  | 0,002022 | 0,00422749 | 0,00103218 | FALSE |
| Rv0262c | 31  | 11  | 1,494764692  | 1,004625252  | 2,131231749  | 0,03307  | 0,05331898 | 0,01302881 | FALSE |
| Rv0264c | 12  | 5   | 1,263034406  | 0,772894966  | 1,061917443  | 0,288273 | 0,36091911 | 0,08810802 | FALSE |
| Rv0265c | 33  | 8   | 2,044394119  | 1,554254679  | 3,092858232  | 0,001982 | 0,00415302 | 0,00101427 | FALSE |
| Rv0267  | 10  | 1   | 3,321928095  | 2,831788655  | 2,485941687  | 0,012921 | 0,02302358 | 0,00561698 | FALSE |
| Rv0270  | 212 | 203 | 0,062584537  | -0,427554903 | -3,040782426 | 0,00236  | 0,00489347 | 0,00119575 | FALSE |
| Rv0271c | 143 | 107 | 0,41840435   | -0,07173509  | -0,393916226 | 0,693643 | 0,75682467 | 0,18493469 | FALSE |
| Rv0272c | 172 | 124 | 0,472068444  | -0,018070996 | -0,10782598  | 0,914134 | 0,93300895 | 0,22798638 | FALSE |
| Rv0274  | 109 | 109 | 0            | -0,49013944  | -2,526490028 | 0,011521 | 0,02073225 | 0,00506605 | FALSE |
| Rv0277c | 107 | 103 | 0,054966459  | -0,435172981 | -2,201404194 | 0,027707 | 0,0454039  | 0,01109472 | FALSE |
| Rv0278c | 6   | 5   | 0,263034406  | -0,227105034 | -0,262384616 | 0,793025 | 0,83979996 | 0,20496008 | FALSE |
| Rv0279c | 14  | 8   | 0,807354922  | 0,317215482  | 0,509439725  | 0,610444 | 0,68519229 | 0,16733468 | FALSE |
| Rv0292  | 24  | 37  | -0,624490865 | -1,114630305 | -3,00384781  | 0,002666 | 0,00546185 | 0,00133464 | FALSE |
| Rv0294  | 12  | 19  | -0,662965013 | -1,153104453 | -2,212017798 | 0,026965 | 0,04423441 | 0,01080668 | FALSE |
| Rv0295c | 11  | 12  | -0,125530882 | -0,615670322 | -1,030210794 | 0,302911 | 0,37479965 | 0,09158456 | FALSE |
| Rv0299  | 22  | 10  | 1,137503524  | 0,647364084  | 1,230808223  | 0,218395 | 0,28206744 | 0,06888992 | FALSE |
| Rv0301  | 94  | 50  | 0,910732662  | 0,420593222  | 1,719295638  | 0,085561 | 0,12415978 | 0,03033919 | FALSE |
| Rv0306  | 11  | 1   | 3,459431619  | 2,969292179  | 2,669508357  | 0,007596 | 0,01423725 | 0,00347479 | FALSE |
| Rv0307c | 13  | 4   | 1,700439718  | 1,210300278  | 1,604449886  | 0,108615 | 0,1535353  | 0,03751049 | FALSE |
| Rv0310c | 2   | 4   | -1           | -1,49013944  | -1,237169867 | 0,216024 | 0,28100394 | 0,06859646 | FALSE |
| Rv0311  | 63  | 53  | 0,249359469  | -0,240779971 | -0,903613548 | 0,3662   | 0,4419757  | 0,10798275 | FALSE |
| Rv0314c | 48  | 20  | 1,263034406  | 0,772894966  | 2,123893496  | 0,033679 | 0,05423369 | 0,01325233 | FALSE |

|         |     |    |              |              |              |          |            |            |       |
|---------|-----|----|--------------|--------------|--------------|----------|------------|------------|-------|
| Rv0315  | 44  | 14 | 1,652076697  | 1,161937257  | 2,85771638   | 0,004267 | 0,00840489 | 0,00205242 | FALSE |
| Rv0316  | 8   | 5  | 0,678071905  | 0,187932465  | 0,233318158  | 0,815514 | 0,85081047 | 0,20778966 | FALSE |
| Rv0317c | 64  | 41 | 0,642447995  | 0,152308555  | 0,538170818  | 0,590459 | 0,66620713 | 0,16279174 | FALSE |
| Rv0318c | 5   | 1  | 2,321928095  | 1,831788655  | 1,352220414  | 0,176305 | 0,23614142 | 0,0576334  | FALSE |
| Rv0320  | 7   | 0  | 3,807354922  | 3,317215482  | 2,239856154  | 0,0251   | 0,04146215 | 0,01011869 | FALSE |
| Rv0322  | 9   | 0  | 4,169925001  | 3,679785561  | 2,645788974  | 0,00815  | 0,01509414 | 0,00368747 | FALSE |
| Rv0326  | 14  | 6  | 1,222392421  | 0,732252981  | 1,094369965  | 0,273793 | 0,34539192 | 0,08427609 | FALSE |
| Rv0329c | 7   | 0  | 3,807354922  | 3,317215482  | 2,239856154  | 0,0251   | 0,04146215 | 0,01011869 | FALSE |
| Rv0335c | 4   | 3  | 0,415037499  | -0,075101941 | -0,069004391 | 0,944986 | 0,95612665 | 0,23342365 | FALSE |
| Rv0336  | 119 | 66 | 0,850423644  | 0,360284204  | 1,674526881  | 0,094027 | 0,13489192 | 0,03296166 | FALSE |
| Rv0337c | 20  | 12 | 0,736965594  | 0,246826154  | 0,479601403  | 0,631511 | 0,70317932 | 0,17182612 | FALSE |
| Rv0343  | 58  | 46 | 0,334419039  | -0,155720401 | -0,552518823 | 0,580593 | 0,65716389 | 0,16058197 | FALSE |
| Rv0344c | 12  | 1  | 3,584962501  | 3,094823061  | 2,843553417  | 0,004461 | 0,00875897 | 0,00213923 | FALSE |
| Rv0345  | 26  | 11 | 1,2410081    | 0,750868659  | 1,524378014  | 0,127414 | 0,17760231 | 0,04339046 | FALSE |
| Rv0346c | 92  | 45 | 1,03170886   | 0,54156942   | 2,144696647  | 0,031977 | 0,05183504 | 0,01266621 | FALSE |
| Rv0354c | 4   | 1  | 2            | 1,50986056   | 1,054098848  | 0,291838 | 0,3631117  | 0,08848889 | FALSE |
| Rv0356c | 6   | 16 | -1,415037499 | -1,905176939 | -2,94399214  | 0,00324  | 0,00652192 | 0,00159367 | FALSE |
| Rv0357c | 14  | 14 | 0            | -0,49013944  | -0,905355944 | 0,365277 | 0,44113378 | 0,10777704 | FALSE |
| Rv0358  | 8   | 4  | 1            | 0,50986056   | 0,598646295  | 0,549409 | 0,62576674 | 0,15284302 | FALSE |
| Rv0359  | 16  | 4  | 2            | 1,50986056   | 2,108212717  | 0,035013 | 0,05619572 | 0,01372612 | FALSE |
| Rv0360c | 1   | 3  | -1,584962501 | -2,075101941 | -1,348183825 | 0,177599 | 0,23702158 | 0,05781885 | FALSE |
| Rv0361  | 55  | 56 | -0,025995209 | -0,516134649 | -1,898269131 | 0,057661 | 0,08802377 | 0,02150914 | FALSE |
| Rv0362  | 18  | 7  | 1,362570079  | 0,872430639  | 1,442971666  | 0,149028 | 0,20369482 | 0,04977406 | FALSE |
| Rv0364  | 43  | 48 | -0,158697746 | -0,648837186 | -2,159061708 | 0,030845 | 0,05014621 | 0,01225353 | FALSE |
| Rv0365c | 35  | 17 | 1,041820176  | 0,551680736  | 1,345110953  | 0,178589 | 0,23781471 | 0,05810156 | FALSE |
| Rv0368c | 4   | 2  | 1            | 0,50986056   | 0,423305433  | 0,672072 | 0,73990495 | 0,18064746 | FALSE |
| Rv0369c | 23  | 11 | 1,064130337  | 0,573990897  | 1,130112835  | 0,258429 | 0,32850391 | 0,08021969 | FALSE |
| Rv0370c | 19  | 15 | 0,341036918  | -0,149102522 | -0,302435927 | 0,76232  | 0,81390532 | 0,19872219 | FALSE |
| Rv0371c | 5   | 2  | 1,321928095  | 0,831788655  | 0,730202124  | 0,465267 | 0,54186288 | 0,13217096 | FALSE |
| Rv0372c | 27  | 7  | 1,94753258   | 1,45739314   | 2,667643133  | 0,007639 | 0,01427541 | 0,00348578 | FALSE |
| Rv0373c | 131 | 80 | 0,711494907  | 0,221355467  | 1,105762462  | 0,268829 | 0,34006433 | 0,08309678 | FALSE |
| Rv0375c | 31  | 9  | 1,784271309  | 1,294131869  | 2,611058884  | 0,009026 | 0,01649389 | 0,0040285  | FALSE |
| Rv0376c | 50  | 55 | -0,137503524 | -0,627642964 | -2,243888914 | 0,02484  | 0,04111846 | 0,01004754 | FALSE |
| Rv0378  | 1   | 0  | NA           | NA           | NA           | NA       | NA         | NA         | FALSE |
| Rv0379  | 15  | 5  | 1,584962501  | 1,094823061  | 1,590531181  | 0,111715 | 0,15717801 | 0,03837283 | FALSE |
| Rv0380c | 28  | 25 | 0,163498732  | -0,326640708 | -0,829443736 | 0,406853 | 0,48115154 | 0,11757229 | FALSE |
| Rv0381c | 89  | 47 | 0,921144579  | 0,431005139  | 1,711260952  | 0,087033 | 0,12610897 | 0,03081549 | FALSE |

|         |     |     |              |              |              |          |            |            |       |
|---------|-----|-----|--------------|--------------|--------------|----------|------------|------------|-------|
| Rv0387c | 8   | 2   | 2            | 1,50986056   | 1,490724428  | 0,136034 | 0,18800645 | 0,04583507 | FALSE |
| Rv0388c | 5   | 1   | 2,321928095  | 1,831788655  | 1,352220414  | 0,176305 | 0,23614142 | 0,0576334  | FALSE |
| Rv0389  | 49  | 27  | 0,859822342  | 0,369682902  | 1,100693884  | 0,27103  | 0,34268149 | 0,08372274 | FALSE |
| Rv0391  | 21  | 14  | 0,584962501  | 0,094823061  | 0,19383764   | 0,846303 | 0,87788903 | 0,21448901 | FALSE |
| Rv0393  | 4   | 1   | 2            | 1,50986056   | 1,054098848  | 0,291838 | 0,3631117  | 0,08848889 | FALSE |
| Rv0394c | 21  | 4   | 2,392317423  | 1,902177983  | 2,842851455  | 0,004471 | 0,00876506 | 0,00214072 | FALSE |
| Rv0395  | 6   | 0   | 3,584962501  | 3,094823061  | 2,010691768  | 0,044358 | 0,06917655 | 0,01688348 | FALSE |
| Rv0396  | 12  | 0   | 4,584962501  | 4,094823061  | 3,163753838  | 0,001557 | 0,00330363 | 0,00080682 | FALSE |
| Rv0397  | 2   | 0   | NA           | NA           | NA           | NA       | NA         | NA         | FALSE |
| Rv0397A | 53  | 68  | -0,359542387 | -0,849681827 | -3,250213997 | 0,001153 | 0,00250176 | 0,00061132 | FALSE |
| Rv0399c | 13  | 9   | 0,530514717  | 0,040375277  | 0,065553521  | 0,947733 | 0,95754166 | 0,23392057 | FALSE |
| Rv0400c | 75  | 36  | 1,058893689  | 0,568754249  | 2,024048259  | 0,042965 | 0,06730006 | 0,01644518 | FALSE |
| Rv0401  | 8   | 3   | 1,415037499  | 0,924898059  | 1,01059623   | 0,31221  | 0,38484184 | 0,09391985 | FALSE |
| Rv0402c | 31  | 37  | -0,255257055 | -0,745396495 | -2,14152987  | 0,032231 | 0,05214972 | 0,01274046 | FALSE |
| Rv0403c | 12  | 3   | 2            | 1,50986056   | 1,825761434  | 0,067886 | 0,10178369 | 0,02485715 | FALSE |
| Rv0406c | 8   | 17  | -1,087462841 | -1,577602281 | -2,65960252  | 0,007823 | 0,01457884 | 0,00356158 | FALSE |
| Rv0407  | 23  | 32  | -0,476438044 | -0,966577484 | -2,485413129 | 0,01294  | 0,02300531 | 0,00562021 | FALSE |
| Rv0408  | 16  | 11  | 0,540568381  | 0,050428941  | 0,090676204  | 0,92775  | 0,94271748 | 0,23035872 | FALSE |
| Rv0411c | 39  | 15  | 1,378511623  | 0,888372183  | 2,156874424  | 0,031015 | 0,05040172 | 0,01231597 | FALSE |
| Rv0412c | 165 | 156 | 0,080919995  | -0,409219445 | -2,55929072  | 0,010489 | 0,01897081 | 0,00463563 | FALSE |
| Rv0413  | 20  | 5   | 2            | 1,50986056   | 2,357059072  | 0,01842  | 0,0315904  | 0,00771592 | FALSE |
| Rv0414c | 0   | 2   | NA           | NA           | NA           | NA       | NA         | NA         | FALSE |
| Rv0415  | 110 | 49  | 1,166649869  | 0,676510429  | 2,861791713  | 0,004213 | 0,00830386 | 0,0020291  | FALSE |
| Rv0416  | 22  | 10  | 1,137503524  | 0,647364084  | 1,230808223  | 0,218395 | 0,28206744 | 0,06888992 | FALSE |
| Rv0417  | 18  | 9   | 1            | 0,50986056   | 0,897976983  | 0,369198 | 0,44504321 | 0,10873222 | FALSE |
| Rv0418  | 9   | 17  | -0,91753784  | -1,40767728  | -2,444054054 | 0,014523 | 0,02547195 | 0,00622283 | FALSE |
| Rv0419  | 100 | 71  | 0,49410907   | 0,00396963   | 0,017990224  | 0,985647 | 0,98944735 | 0,24177744 | FALSE |
| Rv0421c | 36  | 10  | 1,847996907  | 1,357857467  | 2,919900577  | 0,003501 | 0,00701904 | 0,00171514 | FALSE |
| Rv0424c | 16  | 5   | 1,678071905  | 1,187932465  | 1,753869718  | 0,079453 | 0,11664034 | 0,02845898 | FALSE |
| Rv0427c | 23  | 11  | 1,064130337  | 0,573990897  | 1,130112835  | 0,258429 | 0,32850391 | 0,08021969 | FALSE |
| Rv0428c | 2   | 2   | 0            | -0,49013944  | -0,342187506 | 0,73221  | 0,79149598 | 0,19316621 | FALSE |
| Rv0429c | 5   | 3   | 0,736965594  | 0,246826154  | 0,239797393  | 0,810487 | 0,84737698 | 0,20689551 | FALSE |
| Rv0430  | 29  | 7   | 2,050626073  | 1,560486633  | 2,9078358    | 0,003639 | 0,00728065 | 0,00177725 | FALSE |
| Rv0431  | 25  | 16  | 0,64385619   | 0,15371675   | 0,339371192  | 0,73433  | 0,79236228 | 0,19318673 | FALSE |
| Rv0432  | 33  | 9   | 1,874469118  | 1,384329678  | 2,837043524  | 0,004553 | 0,00889484 | 0,00217351 | FALSE |
| Rv0433  | 27  | 9   | 1,584962501  | 1,094823061  | 2,133939061  | 0,032848 | 0,05300436 | 0,01294659 | FALSE |
| Rv0434  | 20  | 3   | 2,736965594  | 2,246826154  | 3,087022158  | 0,002022 | 0,00422749 | 0,00103218 | FALSE |

|         |     |     |              |              |              |          |            |            |       |
|---------|-----|-----|--------------|--------------|--------------|----------|------------|------------|-------|
| Rv0435c | 27  | 18  | 0,584962501  | 0,094823061  | 0,219792503  | 0,826033 | 0,85994613 | 0,21013304 | FALSE |
| Rv0436c | 21  | 15  | 0,485426827  | -0,004712613 | -0,00980115  | 0,99218  | 0,99421675 | 0,24288055 | FALSE |
| Rv0437c | 10  | 8   | 0,321928095  | -0,168211345 | -0,248348112 | 0,803865 | 0,84760176 | 0,20685444 | FALSE |
| Rv0438c | 11  | 13  | -0,2410081   | -0,73114754  | -1,248169793 | 0,211969 | 0,27697457 | 0,06766909 | FALSE |
| Rv0439c | 10  | 7   | 0,514573173  | 0,024433733  | 0,03488969   | 0,972168 | 0,97780164 | 0,23883947 | FALSE |
| Rv0441c | 4   | 1   | 2            | 1,50986056   | 1,054098848  | 0,291838 | 0,3631117  | 0,08848889 | FALSE |
| Rv0444c | 6   | 5   | 0,263034406  | -0,227105034 | -0,262384616 | 0,793025 | 0,83979996 | 0,20496008 | FALSE |
| Rv0446c | 13  | 8   | 0,700439718  | 0,210300278  | 0,331536929  | 0,740239 | 0,79522231 | 0,19421112 | FALSE |
| Rv0447c | 15  | 9   | 0,736965594  | 0,246826154  | 0,415345089  | 0,677889 | 0,7419164  | 0,1811902  | FALSE |
| Rv0448c | 6   | 5   | 0,263034406  | -0,227105034 | -0,262384616 | 0,793025 | 0,83979996 | 0,20496008 | FALSE |
| Rv0450c | 93  | 65  | 0,516790998  | 0,026651558  | 0,116021973  | 0,907635 | 0,92758837 | 0,22666183 | FALSE |
| Rv0451c | 55  | 19  | 1,5334322    | 1,04329276   | 2,928400059  | 0,003407 | 0,00683699 | 0,00167066 | FALSE |
| Rv0453  | 14  | 28  | -1           | -1,49013944  | -3,273309764 | 0,001063 | 0,00232476 | 0,00056791 | FALSE |
| Rv0454  | 1   | 1   | 0            | -0,49013944  | -0,241962819 | 0,808809 | 0,84800619 | 0,20685444 | FALSE |
| Rv0456A | 4   | 0   | NA           | NA           | NA           | NA       | NA         | NA         | FALSE |
| Rv0456B | 13  | 2   | 2,700439718  | 2,210300278  | 2,463914956  | 0,013743 | 0,02428322 | 0,00593107 | FALSE |
| Rv0456c | 6   | 7   | -0,222392421 | -0,712531861 | -0,895464602 | 0,370539 | 0,44617759 | 0,108959   | FALSE |
| Rv0457c | 23  | 9   | 1,353636955  | 0,863497515  | 1,61692385   | 0,105895 | 0,15001592 | 0,03665065 | FALSE |
| Rv0458  | 208 | 162 | 0,360589715  | -0,129549725 | -0,866670949 | 0,386122 | 0,46138546 | 0,11274233 | FALSE |
| Rv0459  | 156 | 74  | 1,075948853  | 0,585809413  | 2,997984005  | 0,002718 | 0,00555348 | 0,00135703 | FALSE |
| Rv0461  | 21  | 18  | 0,222392421  | -0,267747019 | -0,582822205 | 0,560013 | 0,63626731 | 0,15543054 | FALSE |
| Rv0462  | 67  | 37  | 0,856635825  | 0,366496385  | 1,2767121    | 0,201704 | 0,26515865 | 0,06478222 | FALSE |
| Rv0463  | 10  | 12  | -0,263034406 | -0,753173846 | -1,230621959 | 0,218464 | 0,28197093 | 0,06888992 | FALSE |
| Rv0464c | 30  | 10  | 1,584962501  | 1,094823061  | 2,2493739    | 0,024489 | 0,04062381 | 0,00992246 | FALSE |
| Rv0466  | 32  | 21  | 0,607682577  | 0,117543137  | 0,295448258  | 0,767651 | 0,81602804 | 0,19937425 | FALSE |
| Rv0470A | 27  | 35  | -0,374395515 | -0,864534955 | -2,366381887 | 0,017963 | 0,03105141 | 0,00756437 | FALSE |
| Rv0471c | 26  | 29  | -0,157541277 | -0,647680717 | -1,675507723 | 0,093835 | 0,13466532 | 0,03290629 | FALSE |
| Rv0472c | 94  | 45  | 1,062735755  | 0,572596315  | 2,279794248  | 0,02262  | 0,03792644 | 0,00926756 | FALSE |
| Rv0473  | 53  | 39  | 0,442518236  | -0,047621204 | -0,158521222 | 0,874046 | 0,89867036 | 0,21959554 | FALSE |
| Rv0475  | 430 | 237 | 0,859449601  | 0,369310161  | 3,258656791  | 0,001119 | 0,00243934 | 0,00059607 | FALSE |
| Rv0476  | 180 | 109 | 0,723668772  | 0,233529332  | 1,364636254  | 0,172367 | 0,23146311 | 0,05655941 | FALSE |
| Rv0478  | 55  | 30  | 0,874469118  | 0,384329678  | 1,209272916  | 0,226558 | 0,29140614 | 0,07120685 | FALSE |
| Rv0479c | 43  | 33  | 0,381870635  | -0,108268805 | -0,328055133 | 0,74287  | 0,7965149  | 0,19463323 | FALSE |
| Rv0480c | 3   | 3   | 0            | -0,49013944  | -0,419092891 | 0,675148 | 0,74088911 | 0,18081208 | FALSE |
| Rv0482  | 22  | 5   | 2,137503524  | 1,647364084  | 2,633732374  | 0,008445 | 0,01556324 | 0,0037976  | FALSE |
| Rv0483  | 77  | 68  | 0,179323699  | -0,310815741 | -1,305325143 | 0,191782 | 0,25378154 | 0,06201261 | FALSE |
| Rv0488  | 18  | 3   | 2,584962501  | 2,094823061  | 2,803354658  | 0,005057 | 0,0097865  | 0,00239021 | FALSE |

|         |     |      |              |              |              |          |            |            |       |
|---------|-----|------|--------------|--------------|--------------|----------|------------|------------|-------|
| Rv0492A | 10  | 5    | 1            | 0,50986056   | 0,66930803   | 0,503299 | 0,57899031 | 0,14141729 | FALSE |
| Rv0494  | 8   | 2    | 2            | 1,50986056   | 1,490724428  | 0,136034 | 0,18800645 | 0,04583507 | FALSE |
| Rv0498  | 9   | 4    | 1,169925001  | 0,679785561  | 0,82201383   | 0,411069 | 0,48532866 | 0,11853923 | FALSE |
| Rv0500  | 16  | 7    | 1,192645078  | 0,702505638  | 1,128205588  | 0,259233 | 0,32904446 | 0,08036482 | FALSE |
| Rv0500B | 53  | 35   | 0,598637438  | 0,108497998  | 0,351526753  | 0,725193 | 0,78619641 | 0,19211185 | FALSE |
| Rv0504c | 43  | 13   | 1,725825037  | 1,235685597  | 2,966207978  | 0,003015 | 0,00611131 | 0,00149295 | FALSE |
| Rv0505c | 40  | 26   | 0,621488377  | 0,131348937  | 0,368239182  | 0,712695 | 0,77501353 | 0,18937924 | FALSE |
| Rv0506  | 11  | 8    | 0,459431619  | -0,030707821 | -0,046430459 | 0,962967 | 0,97092351 | 0,23718979 | FALSE |
| Rv0508  | 22  | 6    | 1,874469118  | 1,384329678  | 2,316420535  | 0,020535 | 0,03469194 | 0,00847169 | FALSE |
| Rv0511  | 146 | 129  | 0,178597303  | -0,311542137 | -1,801987157 | 0,071547 | 0,10655709 | 0,02603787 | FALSE |
| Rv0513  | 13  | 3    | 2,115477217  | 1,625337777  | 2,005125088  | 0,04495  | 0,06987599 | 0,01706783 | FALSE |
| Rv0514  | 3   | 6    | -1           | -1,49013944  | -1,515219994 | 0,129717 | 0,18039306 | 0,04403309 | FALSE |
| Rv0515  | 118 | 85   | 0,473252113  | -0,016887327 | -0,083438457 | 0,933503 | 0,94806993 | 0,23166662 | FALSE |
| Rv0518  | 7   | 15   | -1,099535674 | -1,589675114 | -2,512114634 | 0,012001 | 0,02153674 | 0,00526263 | FALSE |
| Rv0519c | 4   | 5    | -0,321928095 | -0,812067535 | -0,847774643 | 0,396563 | 0,47241624 | 0,11533221 | FALSE |
| Rv0520  | 13  | 1    | 3,700439718  | 3,210300278  | 3,009274622  | 0,002619 | 0,00537933 | 0,00131309 | FALSE |
| Rv0521  | 0   | 1 NA | NA           | NA           | NA           | NA       | NA         | NA         | FALSE |
| Rv0522  | 39  | 12   | 1,700439718  | 1,210300278  | 2,779036316  | 0,005452 | 0,01045689 | 0,00255182 | FALSE |
| Rv0523c | 0   | 1 NA | NA           | NA           | NA           | NA       | NA         | NA         | FALSE |
| Rv0524  | 8   | 3    | 1,415037499  | 0,924898059  | 1,01059623   | 0,31221  | 0,38484184 | 0,09391985 | FALSE |
| Rv0525  | 4   | 3    | 0,415037499  | -0,075101941 | -0,069004391 | 0,944986 | 0,95612665 | 0,23342365 | FALSE |
| Rv0526  | 2   | 3    | -0,584962501 | -1,075101941 | -0,830648319 | 0,406172 | 0,48063726 | 0,11741104 | FALSE |
| Rv0527  | 6   | 3    | 1            | 0,50986056   | 0,518442029  | 0,60415  | 0,67939679 | 0,16589528 | FALSE |
| Rv0528  | 12  | 3    | 2            | 1,50986056   | 1,825761434  | 0,067886 | 0,10178369 | 0,02485715 | FALSE |
| Rv0529  | 6   | 3    | 1            | 0,50986056   | 0,518442029  | 0,60415  | 0,67939679 | 0,16589528 | FALSE |
| Rv0531  | 12  | 3    | 2            | 1,50986056   | 1,825761434  | 0,067886 | 0,10178369 | 0,02485715 | FALSE |
| Rv0532  | 33  | 15   | 1,137503524  | 0,647364084  | 1,507439335  | 0,131698 | 0,18282297 | 0,0446739  | FALSE |
| Rv0533c | 36  | 35   | 0,040641984  | -0,449497456 | -1,322107137 | 0,186132 | 0,24705891 | 0,06037034 | FALSE |
| Rv0534c | 2   | 0 NA | NA           | NA           | NA           | NA       | NA         | NA         | FALSE |
| Rv0535  | 18  | 14   | 0,362570079  | -0,127569361 | -0,250918781 | 0,801877 | 0,84630522 | 0,20674392 | FALSE |
| Rv0536  | 17  | 5    | 1,765534746  | 1,275395306  | 1,911757353  | 0,055907 | 0,08559816 | 0,02090413 | FALSE |
| Rv0537c | 61  | 37   | 0,721283972  | 0,231144532  | 0,786537592  | 0,431553 | 0,50744141 | 0,12399638 | FALSE |
| Rv0539  | 23  | 5    | 2,201633861  | 1,711494421  | 2,766839373  | 0,00566  | 0,01079791 | 0,00263725 | FALSE |
| Rv0540  | 4   | 1    | 2            | 1,50986056   | 1,054098848  | 0,291838 | 0,3631117  | 0,08848889 | FALSE |
| Rv0541c | 29  | 11   | 1,398549376  | 0,908409936  | 1,895253148  | 0,058059 | 0,08857976 | 0,02164077 | FALSE |
| Rv0542c | 23  | 34   | -0,563900885 | -1,054040325 | -2,751704572 | 0,005929 | 0,01126578 | 0,00275286 | FALSE |
| Rv0544c | 1   | 2    | -1           | -1,49013944  | -0,874809733 | 0,381677 | 0,45754425 | 0,11164947 | FALSE |

|         |     |     |              |              |              |          |            |            |       |
|---------|-----|-----|--------------|--------------|--------------|----------|------------|------------|-------|
| Rv0546c | 15  | 8   | 0,906890596  | 0,416751156  | 0,680935917  | 0,495912 | 0,5716713  | 0,13967072 | FALSE |
| Rv0549c | 26  | 11  | 1,2410081    | 0,750868659  | 1,524378014  | 0,127414 | 0,17760231 | 0,04339046 | FALSE |
| Rv0554  | 12  | 4   | 1,584962501  | 1,094823061  | 1,42261141   | 0,154849 | 0,20995996 | 0,05126938 | FALSE |
| Rv0556  | 18  | 13  | 0,469485283  | -0,020654157 | -0,039879324 | 0,968189 | 0,97518167 | 0,23823009 | FALSE |
| Rv0565c | 18  | 4   | 2,169925001  | 1,679785561  | 2,415571032  | 0,015711 | 0,02738216 | 0,00668354 | FALSE |
| Rv0566c | 11  | 4   | 1,459431619  | 0,969292179  | 1,232394544  | 0,217802 | 0,28246954 | 0,06881664 | FALSE |
| Rv0567  | 66  | 65  | 0,022026306  | -0,468113134 | -1,870369445 | 0,061433 | 0,09323515 | 0,02278257 | FALSE |
| Rv0571c | 103 | 108 | -0,068386975 | -0,558526415 | -2,831990753 | 0,004626 | 0,00901408 | 0,00220264 | FALSE |
| Rv0572c | 18  | 12  | 0,584962501  | 0,094823061  | 0,179458261  | 0,857578 | 0,88769825 | 0,2165029  | FALSE |
| Rv0573c | 10  | 7   | 0,514573173  | 0,024433733  | 0,03488969   | 0,972168 | 0,97780164 | 0,23883947 | FALSE |
| Rv0574c | 58  | 19  | 1,610053482  | 1,119914042  | 3,185485833  | 0,001445 | 0,00308117 | 0,0007527  | FALSE |
| Rv0576  | 92  | 61  | 0,592824618  | 0,102685178  | 0,438787537  | 0,660815 | 0,72998147 | 0,17837539 | FALSE |
| Rv0578c | 167 | 81  | 1,04385429   | 0,55371485   | 2,948322596  | 0,003195 | 0,00646456 | 0,00157947 | FALSE |
| Rv0579  | 70  | 44  | 0,669851398  | 0,179711958  | 0,66095478   | 0,508641 | 0,58453335 | 0,14283426 | FALSE |
| Rv0580c | 61  | 59  | 0,048094288  | -0,442045152 | -1,690330015 | 0,090965 | 0,13107664 | 0,03202937 | FALSE |
| Rv0581  | 41  | 39  | 0,072149786  | -0,417989654 | -1,304898526 | 0,191927 | 0,25380173 | 0,06201799 | FALSE |
| Rv0583c | 5   | 4   | 0,321928095  | -0,168211345 | -0,175607701 | 0,860602 | 0,88718358 | 0,2165029  | FALSE |
| Rv0584  | 68  | 35  | 0,958179824  | 0,468040384  | 1,613917     | 0,106545 | 0,15085566 | 0,03686249 | FALSE |
| Rv0588  | 550 | 357 | 0,623507544  | 0,133368104  | 1,38664987   | 0,165549 | 0,22284285 | 0,054453   | FALSE |
| Rv0591  | 35  | 34  | 0,041820176  | -0,448319264 | -1,299931301 | 0,193625 | 0,25587267 | 0,06252403 | FALSE |
| Rv0592  | 45  | 28  | 0,684498174  | 0,194358734  | 0,571667462  | 0,567547 | 0,64370379 | 0,15729291 | FALSE |
| Rv0593  | 46  | 22  | 1,064130337  | 0,573990897  | 1,598251088  | 0,109987 | 0,15527826 | 0,03794318 | FALSE |
| Rv0594  | 59  | 20  | 1,560714954  | 1,070575514  | 3,097661749  | 0,001951 | 0,00409508 | 0,00100066 | FALSE |
| Rv0596c | 13  | 7   | 0,893084796  | 0,402945356  | 0,614383992  | 0,538962 | 0,61557329 | 0,15037508 | FALSE |
| Rv0597c | 3   | 6   | -1           | -1,49013944  | -1,515219994 | 0,129717 | 0,18039306 | 0,04403309 | FALSE |
| Rv0600c | 0   | 1   | NA           | NA           | NA           | NA       | NA         | NA         | FALSE |
| Rv0601c | NA  | NA  | NA           | NA           | NA           | NA       | NA         | NA         | FALSE |
| Rv0602c | 11  | 3   | 1,874469118  | 1,384329678  | 1,637945495  | 0,101433 | 0,14445518 | 0,03525992 | FALSE |
| Rv0603  | 3   | 1   | 1,584962501  | 1,094823061  | 0,711301316  | 0,476898 | 0,55277082 | 0,13487273 | FALSE |
| Rv0604  | 9   | 7   | 0,362570079  | -0,127569361 | -0,1774247   | 0,859175 | 0,88805654 | 0,2165029  | FALSE |
| Rv0606  | 9   | 7   | 0,362570079  | -0,127569361 | -0,1774247   | 0,859175 | 0,88805654 | 0,2165029  | FALSE |
| Rv0607  | 7   | 9   | -0,362570079 | -0,852709519 | -1,18595664  | 0,235639 | 0,30144863 | 0,07364873 | FALSE |
| Rv0609A | 70  | 32  | 1,129283017  | 0,639143577  | 2,170767504  | 0,029949 | 0,04874943 | 0,01191222 | FALSE |
| Rv0610c | 66  | 53  | 0,316473665  | -0,173665775 | -0,65936845  | 0,509659 | 0,58535858 | 0,14303591 | FALSE |
| Rv0614  | 2   | 1   | 1            | 0,50986056   | 0,29932164   | 0,764695 | 0,81465901 | 0,19872219 | FALSE |
| Rv0615  | 85  | 64  | 0,409390936  | -0,080748504 | -0,342373954 | 0,732069 | 0,79255097 | 0,19316621 | FALSE |
| Rv0616A | 15  | 3   | 2,321928095  | 1,831788655  | 2,342126898  | 0,019174 | 0,03259697 | 0,00795239 | FALSE |

|         |    |     |     |              |              |              |          |            |            |       |
|---------|----|-----|-----|--------------|--------------|--------------|----------|------------|------------|-------|
| Rv0616c | NA | NA  | NA  | NA           | NA           | NA           | NA       | NA         | NA         | FALSE |
| Rv0617  |    | 65  | 26  | 1,321928095  | 0,831788655  | 2,632899848  | 0,008466 | 0,01557205 | 0,00380512 | FALSE |
| Rv0618  |    | 13  | 5   | 1,378511623  | 0,888372183  | 1,245248184  | 0,213041 | 0,27795633 | 0,0678523  | FALSE |
| Rv0619  |    | 16  | 18  | -0,169925001 | -0,660064441 | -1,342368277 | 0,179477 | 0,23875189 | 0,05833053 | FALSE |
| Rv0620  |    | 2   | 4   | -1           | -1,49013944  | -1,237169867 | 0,216024 | 0,28100394 | 0,06859646 | FALSE |
| Rv0621  |    | 35  | 38  | -0,118644496 | -0,608783937 | -1,814986387 | 0,069526 | 0,10386344 | 0,02537966 | FALSE |
| Rv0622  |    | 31  | 13  | 1,253756592  | 0,763617152  | 1,689043203  | 0,091211 | 0,13133464 | 0,03208058 | FALSE |
| Rv0623  |    | 31  | 22  | 0,494764692  | 0,004625252  | 0,011668725  | 0,99069  | 0,99361606 | 0,24276492 | FALSE |
| Rv0624  |    | 74  | 27  | 1,454565863  | 0,964426423  | 3,183240808  | 0,001456 | 0,00310262 | 0,00075814 | FALSE |
| Rv0626  |    | 43  | 45  | -0,065588342 | -0,555727782 | -1,819631751 | 0,068815 | 0,102959   | 0,02515865 | FALSE |
| Rv0627  |    | 48  | 16  | 1,584962501  | 1,094823061  | 2,845293048  | 0,004437 | 0,00872662 | 0,00213187 | FALSE |
| Rv0629c |    | 19  | 21  | -0,144389909 | -0,634529349 | -1,400018289 | 0,161508 | 0,21777905 | 0,05321563 | FALSE |
| Rv0630c |    | 10  | 8   | 0,321928095  | -0,168211345 | -0,248348112 | 0,803865 | 0,84760176 | 0,20685444 | FALSE |
| Rv0632c |    | 77  | 38  | 1,018859027  | 0,528719587  | 1,919775068  | 0,054886 | 0,08441555 | 0,02062745 | FALSE |
| Rv0633c |    | 29  | 23  | 0,334419039  | -0,155720401 | -0,390677824 | 0,696035 | 0,75837562 | 0,18531367 | FALSE |
| Rv0634A |    | 33  | 33  | 0            | -0,49013944  | -1,39002339  | 0,164522 | 0,22157528 | 0,05413393 | FALSE |
| Rv0635  |    | 95  | 84  | 0,177538186  | -0,312601254 | -1,458699998 | 0,144648 | 0,19868071 | 0,04854883 | FALSE |
| Rv0637  |    | 48  | 16  | 1,584962501  | 1,094823061  | 2,845293048  | 0,004437 | 0,00872662 | 0,00213187 | FALSE |
| Rv0638  |    | 244 | 171 | 0,512884823  | 0,022745383  | 0,160517937  | 0,872473 | 0,89728929 | 0,21925807 | FALSE |
| Rv0639  |    | 301 | 212 | 0,505699222  | 0,015559782  | 0,122120306  | 0,902804 | 0,92410186 | 0,22580988 | FALSE |
| Rv0640  |    | 211 | 183 | 0,20539935   | -0,28474009  | -1,970887502 | 0,048737 | 0,07546272 | 0,01843977 | FALSE |
| Rv0646c |    | 14  | 21  | -0,584962501 | -1,075101941 | -2,197727235 | 0,027969 | 0,04581258 | 0,01119458 | FALSE |
| Rv0647c |    | 24  | 16  | 0,584962501  | 0,094823061  | 0,207221756  | 0,835837 | 0,8689942  | 0,21228747 | FALSE |
| Rv0648  |    | 19  | 13  | 0,547487795  | 0,057348355  | 0,112235896  | 0,910636 | 0,93016872 | 0,22723291 | FALSE |
| Rv0649  |    | 0   | 1   | NA           | NA           | NA           | NA       | NA         | NA         | FALSE |
| Rv0650  | NA | NA  | NA  | NA           | NA           | NA           | NA       | NA         | NA         | FALSE |
| Rv0652  |    | 12  | 21  | -0,807354922 | -1,297494362 | -2,552068166 | 0,010709 | 0,01934177 | 0,00472628 | FALSE |
| Rv0657c |    | 12  | 4   | 1,584962501  | 1,094823061  | 1,42261141   | 0,154849 | 0,20995996 | 0,05126938 | FALSE |
| Rv0659c |    | 158 | 138 | 0,195256291  | -0,294883149 | -1,76924767  | 0,076853 | 0,11363469 | 0,02776732 | FALSE |
| Rv0660c |    | 45  | 23  | 0,96829114   | 0,4781517    | 1,338892943  | 0,180606 | 0,23996753 | 0,05863752 | FALSE |
| Rv0662c |    | 0   | 1   | NA           | NA           | NA           | NA       | NA         | NA         | FALSE |
| Rv0663  |    | 99  | 85  | 0,219965684  | -0,270173756 | -1,277563434 | 0,201403 | 0,26498662 | 0,06475108 | FALSE |
| Rv0664  |    | 7   | 4   | 0,807354922  | 0,317215482  | 0,360226021  | 0,718678 | 0,78010787 | 0,19054463 | FALSE |
| Rv0665  |    | 18  | 14  | 0,362570079  | -0,127569361 | -0,250918781 | 0,801877 | 0,84630522 | 0,20674392 | FALSE |
| Rv0666  |    | 7   | 3   | 1,222392421  | 0,732252981  | 0,773832213  | 0,43903  | 0,5153802  | 0,1258039  | FALSE |
| Rv0674  |    | 33  | 8   | 2,044394119  | 1,554254679  | 3,092858232  | 0,001982 | 0,00415302 | 0,00101427 | FALSE |
| Rv0675  |    | 25  | 7   | 1,836501268  | 1,346361828  | 2,417444951  | 0,01563  | 0,02730251 | 0,00667004 | FALSE |

|         |     |     |              |              |              |          |            |            |       |
|---------|-----|-----|--------------|--------------|--------------|----------|------------|------------|-------|
| Rv0679c | 10  | 3   | 1,736965594  | 1,246826154  | 1,440514091  | 0,149722 | 0,20428527 | 0,04986607 | FALSE |
| Rv0680c | 9   | 2   | 2,169925001  | 1,679785561  | 1,708058052  | 0,087626 | 0,12673254 | 0,03093349 | FALSE |
| Rv0681  | 34  | 9   | 1,91753784   | 1,4273984    | 2,947223371  | 0,003206 | 0,0064792  | 0,00157947 | FALSE |
| Rv0682  | 250 | 140 | 0,836501268  | 0,346361828  | 2,339225049  | 0,019324 | 0,0327657  | 0,0080065  | FALSE |
| Rv0683  | 223 | 174 | 0,357956404  | -0,132183036 | -0,916050318 | 0,359641 | 0,43493223 | 0,10627832 | FALSE |
| Rv0686  | 41  | 17  | 1,270089163  | 0,779949723  | 1,978412682  | 0,047882 | 0,07416893 | 0,01812363 | FALSE |
| Rv0687  | 159 | 104 | 0,612443237  | 0,122303797  | 0,684766259  | 0,493491 | 0,56963761 | 0,1391398  | FALSE |
| Rv0688  | 109 | 69  | 0,659659868  | 0,169520428  | 0,779406701  | 0,43574  | 0,51221114 | 0,12516189 | FALSE |
| Rv0689c | NA  | NA  | NA           | NA           | NA           | NA       | NA         | NA         | FALSE |
| Rv0690c | 113 | 55  | 1,038819249  | 0,548679809  | 2,405184471  | 0,016164 | 0,02812906 | 0,00687351 | FALSE |
| Rv0691A | 69  | 36  | 0,938599455  | 0,448460015  | 1,563024548  | 0,118047 | 0,16569836 | 0,0404894  | FALSE |
| Rv0691c | 64  | 26  | 1,299560282  | 0,809420842  | 2,552185402  | 0,010705 | 0,01934421 | 0,00472628 | FALSE |
| Rv0692  | 106 | 61  | 0,797183117  | 0,307043677  | 1,359342908  | 0,174038 | 0,23346555 | 0,05704872 | FALSE |
| Rv0693  | 109 | 49  | 1,153474481  | 0,663335041  | 2,799656476  | 0,005116 | 0,00988462 | 0,00241537 | FALSE |
| Rv0694  | 37  | 44  | -0,249978253 | -0,740117693 | -2,320938671 | 0,02029  | 0,03431488 | 0,00838505 | FALSE |
| Rv0696  | 12  | 22  | -0,874469118 | -1,364608558 | -2,715475699 | 0,006618 | 0,01252716 | 0,00306109 | FALSE |
| Rv0697  | 13  | 15  | -0,206450877 | -0,696590318 | -1,285055122 | 0,198773 | 0,26192295 | 0,06394851 | FALSE |
| Rv0698  | 15  | 7   | 1,099535674  | 0,609396234  | 0,963010104  | 0,335542 | 0,40946665 | 0,09996325 | FALSE |
| Rv0699  | NA  | NA  | NA           | NA           | NA           | NA       | NA         | NA         | FALSE |
| Rv0711  | 188 | 119 | 0,659771088  | 0,169631648  | 1,024327199  | 0,305681 | 0,37768813 | 0,09227578 | FALSE |
| Rv0714  | 92  | 84  | 0,131244533  | -0,358894907 | -1,661337557 | 0,096646 | 0,13824225 | 0,03378033 | FALSE |
| Rv0717  | 71  | 30  | 1,242856524  | 0,752717084  | 2,524520753  | 0,011586 | 0,02083917 | 0,00509101 | FALSE |
| Rv0719  | 140 | 78  | 0,843880798  | 0,353741358  | 1,785352046  | 0,074204 | 0,11026162 | 0,02694309 | FALSE |
| Rv0720  | 42  | 29  | 0,534336428  | 0,044196988  | 0,128899419  | 0,897437 | 0,91957292 | 0,22470321 | FALSE |
| Rv0723  | 72  | 35  | 1,040641984  | 0,550502544  | 1,925590013  | 0,054156 | 0,08335734 | 0,02036264 | FALSE |
| Rv0724A | 1   | 0   | NA           | NA           | NA           | NA       | NA         | NA         | FALSE |
| Rv0726c | 81  | 43  | 0,913585248  | 0,423445808  | 1,605998419  | 0,108274 | 0,1531369  | 0,03741993 | FALSE |
| Rv0727c | 0   | 1   | NA           | NA           | NA           | NA       | NA         | NA         | FALSE |
| Rv0729  | 14  | 5   | 1,485426827  | 0,995287387  | 1,421201948  | 0,155258 | 0,21011357 | 0,05129808 | FALSE |
| Rv0731c | 4   | 1   | 2            | 1,50986056   | 1,054098848  | 0,291838 | 0,3631117  | 0,08848889 | FALSE |
| Rv0733  | 23  | 12  | 0,938599455  | 0,448460015  | 0,902377036  | 0,366857 | 0,44256258 | 0,10814284 | FALSE |
| Rv0734  | 6   | 14  | -1,222392421 | -1,712531861 | -2,559420695 | 0,010485 | 0,0189725  | 0,00463563 | FALSE |
| Rv0735  | 15  | 29  | -0,9510904   | -1,44122984  | -3,249337216 | 0,001157 | 0,0025081  | 0,00061287 | FALSE |
| Rv0736  | 11  | 0   | 4,459431619  | 3,969292179  | 3,000774903  | 0,002693 | 0,0055086  | 0,00134535 | FALSE |
| Rv0737  | 7   | 2   | 1,807354922  | 1,317215482  | 1,257822137  | 0,208456 | 0,27274955 | 0,06661452 | FALSE |
| Rv0738  | 14  | 15  | -0,099535674 | -0,589675114 | -1,108162795 | 0,267792 | 0,33891618 | 0,0828028  | FALSE |
| Rv0739  | 16  | 7   | 1,192645078  | 0,702505638  | 1,128205588  | 0,259233 | 0,32904446 | 0,08036482 | FALSE |



|         |     |     |              |              |              |          |            |            |       |
|---------|-----|-----|--------------|--------------|--------------|----------|------------|------------|-------|
| Rv0742  | 7   | 8   | -0,192645078 | -0,682784518 | -0,922068105 | 0,356493 | 0,43259956 | 0,10567548 | FALSE |
| Rv0745  | 1   | 0   | NA           | NA           | NA           | NA       | NA         | NA         | FALSE |
| Rv0746  | 1   | 3   | -1,584962501 | -2,075101941 | -1,348183825 | 0,177599 | 0,23702158 | 0,05781885 | FALSE |
| Rv0748  | 14  | 2   | 2,807354922  | 2,317215482  | 2,631401555  | 0,008503 | 0,01561513 | 0,00381296 | FALSE |
| Rv0749  | 21  | 25  | -0,251538767 | -0,741678207 | -1,752651745 | 0,079662 | 0,11668392 | 0,02851242 | FALSE |
| Rv0749A | 9   | 4   | 1,169925001  | 0,679785561  | 0,82201383   | 0,411069 | 0,48532866 | 0,11853923 | FALSE |
| Rv0750  | 42  | 21  | 1            | 0,50986056   | 1,371710144  | 0,170154 | 0,22880515 | 0,05590992 | FALSE |
| Rv0756c | 41  | 14  | 1,550197083  | 1,060057643  | 2,561523115  | 0,010421 | 0,0188668  | 0,00461022 | FALSE |
| Rv0759c | 156 | 94  | 0,730813367  | 0,240673927  | 1,307624611  | 0,191001 | 0,25283308 | 0,06178129 | FALSE |
| Rv0760c | 9   | 15  | -0,736965594 | -1,227105034 | -2,064902932 | 0,038932 | 0,06185117 | 0,015092   | FALSE |
| Rv0761c | 95  | 59  | 0,687212559  | 0,197073119  | 0,841857095  | 0,399868 | 0,47468744 | 0,11597512 | FALSE |
| Rv0765c | 163 | 106 | 0,6208077    | 0,13066826   | 0,73967296   | 0,459498 | 0,53690649 | 0,13119635 | FALSE |
| Rv0771  | 4   | 12  | -1,584962501 | -2,075101941 | -2,696384287 | 0,00701  | 0,0132108  | 0,00322658 | FALSE |
| Rv0772  | 52  | 54  | -0,054447784 | -0,544587224 | -1,957142839 | 0,050331 | 0,07786898 | 0,01902776 | FALSE |
| Rv0773c | 30  | 30  | 0            | -0,49013944  | -1,325330579 | 0,185062 | 0,24580452 | 0,06006382 | FALSE |
| Rv0776c | 14  | 9   | 0,637429921  | 0,147290481  | 0,243613624  | 0,80753  | 0,84905895 | 0,20685444 | FALSE |
| Rv0779c | 6   | 2   | 1,584962501  | 1,094823061  | 1,005934037  | 0,314447 | 0,38650196 | 0,09441437 | FALSE |
| Rv0780  | 13  | 23  | -0,823122238 | -1,313261678 | -2,695916613 | 0,00702  | 0,01321024 | 0,003228   | FALSE |
| Rv0781  | 58  | 44  | 0,398549376  | -0,091590064 | -0,321383111 | 0,74792  | 0,80170956 | 0,19590258 | FALSE |
| Rv0784  | 13  | 12  | 0,115477217  | -0,374662223 | -0,653666104 | 0,513327 | 0,58905134 | 0,14389597 | FALSE |
| Rv0785  | 33  | 33  | 0            | -0,49013944  | -1,39002339  | 0,164522 | 0,22157528 | 0,05413393 | FALSE |
| Rv0786c | 14  | 4   | 1,807354922  | 1,317215482  | 1,778837029  | 0,075266 | 0,11164886 | 0,02726654 | FALSE |
| Rv0787  | 6   | 12  | -1           | -1,49013944  | -2,142855462 | 0,032125 | 0,05205269 | 0,01271939 | FALSE |
| Rv0787A | 49  | 52  | -0,085729874 | -0,575869314 | -2,019892682 | 0,043395 | 0,06790447 | 0,01658954 | FALSE |
| Rv0789c | 125 | 70  | 0,836501268  | 0,346361828  | 1,65389811   | 0,098148 | 0,1401861  | 0,03425532 | FALSE |
| Rv0794c | 150 | 118 | 0,346175641  | -0,143963799 | -0,819867566 | 0,412292 | 0,48640445 | 0,11885587 | FALSE |
| Rv0795  | 32  | 39  | -0,285402219 | -0,775541659 | -2,275649992 | 0,022867 | 0,03831603 | 0,00936075 | FALSE |
| Rv0797  | 22  | 17  | 0,371968777  | -0,118170663 | -0,256546453 | 0,797529 | 0,84274128 | 0,20590107 | FALSE |
| Rv0798c | 9   | 8   | 0,169925001  | -0,320214439 | -0,460475873 | 0,645175 | 0,71563901 | 0,17479625 | FALSE |
| Rv0799c | 4   | 8   | -1           | -1,49013944  | -1,749628282 | 0,080182 | 0,11720478 | 0,02862363 | FALSE |
| Rv0800  | 24  | 12  | 1            | 0,50986056   | 1,03689973   | 0,299783 | 0,37104628 | 0,0906674  | FALSE |
| Rv0801  | 19  | 6   | 1,662965013  | 1,172825573  | 1,891880126  | 0,058507 | 0,0891415  | 0,02177377 | FALSE |
| Rv0803  | 23  | 33  | -0,520832163 | -1,010971603 | -2,619642805 | 0,008802 | 0,01611843 | 0,00393771 | FALSE |
| Rv0804  | 0   | 3   | NA           | NA           | NA           | NA       | NA         | NA         | FALSE |
| Rv0806c | 118 | 126 | -0,094636874 | -0,584776314 | -3,188190572 | 0,001432 | 0,00305666 | 0,00074691 | FALSE |
| Rv0807  | 18  | 28  | -0,637429921 | -1,127569361 | -2,637490763 | 0,008352 | 0,01543554 | 0,00377177 | FALSE |
| Rv0811c | 114 | 62  | 0,878693704  | 0,388554264  | 1,758926307  | 0,07859  | 0,11607188 | 0,02833413 | FALSE |

|         |     |      |              |              |              |          |            |            |       |
|---------|-----|------|--------------|--------------|--------------|----------|------------|------------|-------|
| Rv0813c | 95  | 59   | 0,687212559  | 0,197073119  | 0,841857095  | 0,399868 | 0,47468744 | 0,11597512 | FALSE |
| Rv0816c | 14  | 3    | 2,222392421  | 1,732252981  | 2,176985072  | 0,029482 | 0,04803921 | 0,01173622 | FALSE |
| Rv0817c | 5   | 2    | 1,321928095  | 0,831788655  | 0,730202124  | 0,465267 | 0,54186288 | 0,13217096 | FALSE |
| Rv0818  | 267 | 146  | 0,870871373  | 0,380731933  | 2,641591436  | 0,008252 | 0,01526437 | 0,00372994 | FALSE |
| Rv0819  | 19  | 14   | 0,440572591  | -0,049566849 | -0,098820853 | 0,921281 | 0,93785203 | 0,22911009 | FALSE |
| Rv0820  | 28  | 9    | 1,637429921  | 1,147290481  | 2,256629083  | 0,024031 | 0,0399498  | 0,00976197 | FALSE |
| Rv0821c | 88  | 59   | 0,576788569  | 0,086649129  | 0,363131151  | 0,716507 | 0,77872516 | 0,19025478 | FALSE |
| Rv0828c | 8   | 2    | 2            | 1,50986056   | 1,490724428  | 0,136034 | 0,18800645 | 0,04583507 | FALSE |
| Rv0831c | 60  | 29   | 1,0489096    | 0,55877016   | 1,781642237  | 0,074808 | 0,11107363 | 0,02714151 | FALSE |
| Rv0832  | 15  | 27   | -0,847996907 | -1,338136347 | -2,963486619 | 0,003042 | 0,00616081 | 0,00150543 | FALSE |
| Rv0833  | 22  | 21   | 0,067114196  | -0,423025244 | -0,968202796 | 0,332943 | 0,40693045 | 0,09942354 | FALSE |
| Rv0839  | 168 | 97   | 0,792404581  | 0,302265141  | 1,686174942  | 0,091762 | 0,1320306  | 0,03224289 | FALSE |
| Rv0841  | 0   | 4 NA | NA           | NA           | NA           | NA       | NA         | NA         | FALSE |
| Rv0842  | 64  | 34   | 0,912537159  | 0,422397719  | 1,42425848   | 0,154372 | 0,20967699 | 0,05123584 | FALSE |
| Rv0843  | 24  | 7    | 1,777607579  | 1,287468139  | 2,288226253  | 0,022124 | 0,03715939 | 0,00908012 | FALSE |
| Rv0844c | 7   | 5    | 0,485426827  | -0,004712613 | -0,005658617 | 0,995485 | 0,99612282 | 0,24331511 | FALSE |
| Rv0845  | 20  | 6    | 1,736965594  | 1,246826154  | 2,037207815  | 0,041629 | 0,06558891 | 0,01601735 | FALSE |
| Rv0851c | 19  | 6    | 1,662965013  | 1,172825573  | 1,891880126  | 0,058507 | 0,0891415  | 0,02177377 | FALSE |
| Rv0852  | 16  | 18   | -0,169925001 | -0,660064441 | -1,342368277 | 0,179477 | 0,23875189 | 0,05833053 | FALSE |
| Rv0853c | 34  | 21   | 0,695145418  | 0,205005978  | 0,523158552  | 0,600864 | 0,67657832 | 0,16532601 | FALSE |
| Rv0854  | 46  | 23   | 1            | 0,50986056   | 1,435549194  | 0,151131 | 0,20570416 | 0,05026506 | FALSE |
| Rv0855  | 30  | 7    | 2,099535674  | 1,609396234  | 3,024501099  | 0,00249  | 0,00515103 | 0,00125802 | FALSE |
| Rv0856  | 38  | 12   | 1,662965013  | 1,172825573  | 2,675556456  | 0,007461 | 0,01401317 | 0,00342256 | FALSE |
| Rv0858c | 7   | 1    | 2,807354922  | 2,317215482  | 1,860676038  | 0,06279  | 0,09498149 | 0,02317788 | FALSE |
| Rv0862c | 22  | 23   | -0,064130337 | -0,554269777 | -1,297773487 | 0,194365 | 0,25667773 | 0,06272076 | FALSE |
| Rv0864  | 110 | 69   | 0,672835257  | 0,182695817  | 0,841903762  | 0,399842 | 0,47487297 | 0,11597512 | FALSE |
| Rv0865  | 30  | 8    | 1,906890596  | 1,416751156  | 2,75285188   | 0,005908 | 0,01123458 | 0,00274457 | FALSE |
| Rv0866  | 35  | 12   | 1,544320516  | 1,054181076  | 2,355952752  | 0,018475 | 0,03162907 | 0,00772537 | FALSE |
| Rv0867c | 18  | 14   | 0,362570079  | -0,127569361 | -0,250918781 | 0,801877 | 0,84630522 | 0,20674392 | FALSE |
| Rv0868c | 4   | 5    | -0,321928095 | -0,812067535 | -0,847774643 | 0,396563 | 0,47241624 | 0,11533221 | FALSE |
| Rv0870c | 41  | 43   | -0,06871275  | -0,55885219  | -1,787763882 | 0,073814 | 0,10976546 | 0,02682185 | FALSE |
| Rv0871  | 54  | 25   | 1,111031312  | 0,620891872  | 1,858004815  | 0,063168 | 0,09527707 | 0,02328153 | FALSE |
| Rv0874c | 59  | 35   | 0,753360032  | 0,263220592  | 0,875995311  | 0,381033 | 0,45768448 | 0,11164947 | FALSE |
| Rv0875c | 4   | 4    | 0            | -0,49013944  | -0,483927361 | 0,628437 | 0,70115661 | 0,17118513 | FALSE |
| Rv0877  | 289 | 185  | 0,643544222  | 0,153404782  | 1,151871515  | 0,249374 | 0,31771778 | 0,07763626 | FALSE |
| Rv0878c | 24  | 9    | 1,415037499  | 0,924898059  | 1,750424383  | 0,080045 | 0,11715748 | 0,02861741 | FALSE |
| Rv0879c | 2   | 1    | 1            | 0,50986056   | 0,29932164   | 0,764695 | 0,81465901 | 0,19872219 | FALSE |

|         |     |     |              |              |              |          |            |            |       |
|---------|-----|-----|--------------|--------------|--------------|----------|------------|------------|-------|
| Rv0880  | 14  | 5   | 1,485426827  | 0,995287387  | 1,421201948  | 0,155258 | 0,21011357 | 0,05129808 | FALSE |
| Rv0881  | 22  | 7   | 1,652076697  | 1,161937257  | 2,020680852  | 0,043313 | 0,06781738 | 0,01657159 | FALSE |
| Rv0882  | 2   | 2   | 0            | -0,49013944  | -0,342187506 | 0,73221  | 0,79149598 | 0,19316621 | FALSE |
| Rv0883c | 21  | 18  | 0,222392421  | -0,267747019 | -0,582822205 | 0,560013 | 0,63626731 | 0,15543054 | FALSE |
| Rv0887c | 8   | 2   | 2            | 1,50986056   | 1,490724428  | 0,136034 | 0,18800645 | 0,04583507 | FALSE |
| Rv0889c | 38  | 49  | -0,366782331 | -0,856921771 | -2,778988946 | 0,005453 | 0,01044559 | 0,00255182 | FALSE |
| Rv0890c | 14  | 7   | 1            | 0,50986056   | 0,7919386    | 0,428396 | 0,50410976 | 0,12312662 | FALSE |
| Rv0891c | 33  | 42  | -0,347923303 | -0,838062743 | -2,524439756 | 0,011588 | 0,02083437 | 0,00509101 | FALSE |
| Rv0892  | 21  | 14  | 0,584962501  | 0,094823061  | 0,19383764   | 0,846303 | 0,87788903 | 0,21448901 | FALSE |
| Rv0893c | NA  | NA  | NA           | NA           | NA           | NA       | NA         | NA         | FALSE |
| Rv0894  | 10  | 2   | 2,321928095  | 1,831788655  | 1,912333526  | 0,055833 | 0,08570343 | 0,02090413 | FALSE |
| Rv0895  | 9   | 8   | 0,169925001  | -0,320214439 | -0,460475873 | 0,645175 | 0,71563901 | 0,17479625 | FALSE |
| Rv0899  | 37  | 9   | 2,039528364  | 1,549388924  | 3,267453271  | 0,001085 | 0,00236809 | 0,0005785  | FALSE |
| Rv0901  | 7   | 10  | -0,514573173 | -1,004712613 | -1,434660522 | 0,151384 | 0,20597699 | 0,05033172 | FALSE |
| Rv0902c | 47  | 23  | 1,031026896  | 0,540887456  | 1,531118339  | 0,12574  | 0,17564489 | 0,04288732 | FALSE |
| Rv0904c | 8   | 19  | -1,247927513 | -1,738066953 | -3,012743973 | 0,002589 | 0,00533365 | 0,00130297 | FALSE |
| Rv0905  | 24  | 31  | -0,36923381  | -0,85937325  | -2,215733893 | 0,02671  | 0,04387947 | 0,01072221 | FALSE |
| Rv0906  | 15  | 14  | 0,099535674  | -0,390603766 | -0,734052619 | 0,462917 | 0,54057703 | 0,13205378 | FALSE |
| Rv0908  | 36  | 18  | 1            | 0,50986056   | 1,269950423  | 0,204102 | 0,26763581 | 0,06539843 | FALSE |
| Rv0909  | 22  | 5   | 2,137503524  | 1,647364084  | 2,633732374  | 0,008445 | 0,01556324 | 0,0037976  | FALSE |
| Rv0911  | 18  | 12  | 0,584962501  | 0,094823061  | 0,179458261  | 0,857578 | 0,88769825 | 0,2165029  | FALSE |
| Rv0912  | 4   | 12  | -1,584962501 | -2,075101941 | -2,696384287 | 0,00701  | 0,0132108  | 0,00322658 | FALSE |
| Rv0915c | 11  | 16  | -0,540568381 | -1,030707821 | -1,853314183 | 0,063837 | 0,09613761 | 0,02348042 | FALSE |
| Rv0916c | 5   | 4   | 0,321928095  | -0,168211345 | -0,175607701 | 0,860602 | 0,88718358 | 0,2165029  | FALSE |
| Rv0920c | 64  | 58  | 0,142019005  | -0,348120435 | -1,341502237 | 0,179757 | 0,23900334 | 0,05840191 | FALSE |
| Rv0923c | 16  | 3   | 2,415037499  | 1,924898059  | 2,501209593  | 0,012377 | 0,02217071 | 0,00541755 | FALSE |
| Rv0924c | 25  | 9   | 1,473931188  | 0,983791748  | 1,880983603  | 0,059974 | 0,09121677 | 0,02228503 | FALSE |
| Rv0927c | 7   | 0   | 3,807354922  | 3,317215482  | 2,239856154  | 0,0251   | 0,04146215 | 0,01011869 | FALSE |
| Rv0928  | 41  | 38  | 0,109624491  | -0,380514949 | -1,180218485 | 0,237913 | 0,30410853 | 0,07431076 | FALSE |
| Rv0929  | 7   | 6   | 0,222392421  | -0,267747019 | -0,336487378 | 0,736503 | 0,79208087 | 0,19349646 | FALSE |
| Rv0930  | 24  | 9   | 1,415037499  | 0,924898059  | 1,750424383  | 0,080045 | 0,11715748 | 0,02861741 | FALSE |
| Rv0932c | 347 | 269 | 0,36732949   | -0,12280995  | -1,060083516 | 0,289107 | 0,36149897 | 0,08833446 | FALSE |
| Rv0933  | 26  | 30  | -0,206450877 | -0,696590318 | -1,817372519 | 0,06916  | 0,10339593 | 0,02525575 | FALSE |
| Rv0934  | 23  | 5   | 2,201633861  | 1,711494421  | 2,766839373  | 0,00566  | 0,01079791 | 0,00263725 | FALSE |
| Rv0936  | 30  | 7   | 2,099535674  | 1,609396234  | 3,024501099  | 0,00249  | 0,00515103 | 0,00125802 | FALSE |
| Rv0937c | 33  | 22  | 0,584962501  | 0,094823061  | 0,242991168  | 0,808012 | 0,84888022 | 0,20685444 | FALSE |
| Rv0938  | 58  | 45  | 0,366127899  | -0,124011541 | -0,437599734 | 0,661676 | 0,73072585 | 0,17855728 | FALSE |

| Rv0942  | NA  | NA  | NA           | NA           | NA           | NA           | NA         | NA         | NA         | NA    | FALSE |
|---------|-----|-----|--------------|--------------|--------------|--------------|------------|------------|------------|-------|-------|
| Rv0943c |     | 4   | 4            | 0            | -0,49013944  | -0,483927361 | 0,628437   | 0,70115661 | 0,17118513 | FALSE |       |
| Rv0944  |     | 7   | 1            | 2,807354922  | 2,317215482  | 1,860676038  | 0,06279    | 0,09498149 | 0,02317788 | FALSE |       |
| Rv0945  |     | 13  | 10           | 0,378511623  | -0,111627817 | -0,186076967 | 0,852384   | 0,88361059 | 0,21586868 | FALSE |       |
| Rv0948c |     | 21  | 11           | 0,932885804  | 0,442746364  | 0,852107338  | 0,394155   | 0,47019197 | 0,1148767  | FALSE |       |
| Rv0950c |     | 51  | 16           | 1,672425342  | 1,182285902  | 3,119523429  | 0,001811   | 0,00381947 | 0,00093331 | FALSE |       |
| Rv0951  |     | 41  | 29           | 0,499571009  | 0,009431569  | 0,027341711  | 0,978187   | 0,98246424 | 0,24007108 | FALSE |       |
| Rv0952  |     | 15  | 19           | -0,341036918 | -0,831176358 | -1,685937893 | 0,091808   | 0,13195043 | 0,03224289 | FALSE |       |
| Rv0956  |     | 14  | 4            | 1,807354922  | 1,317215482  | 1,778837029  | 0,075266   | 0,11164886 | 0,02726654 | FALSE |       |
| Rv0957  |     | 19  | 16           | 0,247927513  | -0,242211927 | -0,49928829  | 0,617576   | 0,69230242 | 0,169144   | FALSE |       |
| Rv0959  |     | 36  | 47           | -0,38466385  | -0,87480329  | -2,769875065 | 0,005608   | 0,01071874 | 0,00261919 | FALSE |       |
| Rv0961  |     | 49  | 32           | 0,614709844  | 0,124570404  | 0,386990478  | 0,698763   | 0,76113543 | 0,18598805 | FALSE |       |
| Rv0962c |     | 4   | 1            | 2            | 1,50986056   | 1,054098848  | 0,291838   | 0,3631117  | 0,08848889 | FALSE |       |
| Rv0963c |     | 19  | 9            | 1,078002512  | 0,587863072  | 1,049446782  | 0,293973   | 0,36443262 | 0,08902305 | FALSE |       |
| Rv0964c |     | 7   | 2            | 1,807354922  | 1,317215482  | 1,257822137  | 0,208456   | 0,27274955 | 0,06661452 | FALSE |       |
| Rv0965c |     | 19  | 3            | 2,662965013  | 2,172825573  | 2,947310832  | 0,003206   | 0,0064824  | 0,00157947 | FALSE |       |
| Rv0966c |     | 22  | 5            | 2,137503524  | 1,647364084  | 2,633732374  | 0,008445   | 0,01556324 | 0,0037976  | FALSE |       |
| Rv0972c |     | 72  | 57           | 0,337034987  | -0,153104453 | -0,604994141 | 0,545183   | 0,62140665 | 0,15184447 | FALSE |       |
| Rv0973c |     | 21  | 21           | 0            | -0,49013944  | -1,108839266 | 0,2675     | 0,33876623 | 0,08276616 | FALSE |       |
| Rv0974c |     | 11  | 2            | 2,459431619  | 1,969292179  | 2,105458637  | 0,035251   | 0,05649774 | 0,01379707 | FALSE |       |
| Rv0975c |     | 26  | 6            | 2,115477217  | 1,625337777  | 2,835696123  | 0,004573   | 0,00892353 | 0,00217943 | FALSE |       |
| Rv0976c |     | 11  | 3            | 1,874469118  | 1,384329678  | 1,637945495  | 0,101433   | 0,14445518 | 0,03525992 | FALSE |       |
| Rv0977  |     | 21  | 3            | 2,807354922  | 2,317215482  | 3,222805685  | 0,001269   | 0,00272966 | 0,00066664 | FALSE |       |
| Rv0978c |     | 24  | 4            | 2,584962501  | 2,094823061  | 3,237044548  | 0,001208   | 0,00260782 | 0,00063657 | FALSE |       |
| Rv0979A |     | 19  | 10           | 0,925999419  | 0,435859979  | 0,798860542  | 0,424371   | 0,49974965 | 0,12211685 | FALSE |       |
| Rv0982  | 434 | 320 | 0,439623138  | -0,050516302 | -0,481628553 | 0,63007      | 0,70217543 | 0,17158081 | FALSE      |       |       |
| Rv0987  | 99  | 61  | 0,698619283  | 0,208479842  | 0,907347981  | 0,364223     | 0,440065   | 0,10753254 | FALSE      |       |       |
| Rv0988  | 52  | 18  | 1,530514717  | 1,040375277  | 2,840882245  | 0,004499     | 0,0088061  | 0,00215075 | FALSE      |       |       |
| Rv0992c | 18  | 4   | 2,169925001  | 1,679785561  | 2,415571032  | 0,015711     | 0,02738216 | 0,00668354 | FALSE      |       |       |
| Rv0993  | 47  | 32  | 0,554588852  | 0,064449412  | 0,198143297  | 0,842933     | 0,87543967 | 0,21391898 | FALSE      |       |       |
| Rv0997  | 54  | 62  | -0,199308808 | -0,689448248 | -2,589144839 | 0,009621     | 0,01752416 | 0,00428214 | FALSE      |       |       |
| Rv0998  | 83  | 34  | 1,28757659   | 0,79743715   | 2,869403232  | 0,004112     | 0,00812302 | 0,00198491 | FALSE      |       |       |
| Rv0999  | 11  | 4   | 1,459431619  | 0,969292179  | 1,232394544  | 0,217802     | 0,28246954 | 0,06881664 | FALSE      |       |       |
| Rv1000c | 9   | 2   | 2,169925001  | 1,679785561  | 1,708058052  | 0,087626     | 0,12673254 | 0,03093349 | FALSE      |       |       |
| Rv1001  | 106 | 88  | 0,268488836  | -0,221650604 | -1,075460185 | 0,282169     | 0,35418482 | 0,0865472  | FALSE      |       |       |
| Rv1002c | 34  | 14  | 1,280107919  | 0,789968479  | 1,821592467  | 0,068517     | 0,10259136 | 0,02506882 | FALSE      |       |       |
| Rv1003  | 18  | 6   | 1,584962501  | 1,094823061  | 1,742343196  | 0,081448     | 0,11881062 | 0,02902125 | FALSE      |       |       |



|         |     |     |              |              |              |          |            |            |       |
|---------|-----|-----|--------------|--------------|--------------|----------|------------|------------|-------|
| Rv1054  | 6   | 10  | -0,736965594 | -1,227105034 | -1,685978429 | 0,0918   | 0,13201209 | 0,03224289 | FALSE |
| Rv1055  | 10  | 5   | 1            | 0,50986056   | 0,66930803   | 0,503299 | 0,57899031 | 0,14141729 | FALSE |
| Rv1056  | 37  | 12  | 1,624490865  | 1,134351425  | 2,570589323  | 0,010153 | 0,01844847 | 0,004508   | FALSE |
| Rv1058  | 19  | 19  | 0            | -0,49013944  | -1,054714018 | 0,291556 | 0,36397913 | 0,08848889 | FALSE |
| Rv1059  | 56  | 64  | -0,192645078 | -0,682784518 | -2,608164686 | 0,009103 | 0,01661069 | 0,00405892 | FALSE |
| Rv1064c | 3   | 4   | -0,415037499 | -0,905176939 | -0,831685343 | 0,405587 | 0,48052657 | 0,11734837 | FALSE |
| Rv1067c | 3   | 4   | -0,415037499 | -0,905176939 | -0,831685343 | 0,405587 | 0,48052657 | 0,11734837 | FALSE |
| Rv1068c | 6   | 2   | 1,584962501  | 1,094823061  | 1,005934037  | 0,314447 | 0,38650196 | 0,09441437 | FALSE |
| Rv1069c | 33  | 20  | 0,722466024  | 0,232326584  | 0,581335186  | 0,561015 | 0,63694197 | 0,15557396 | FALSE |
| Rv1070c | 41  | 21  | 0,965234582  | 0,475095142  | 1,270500906  | 0,203906 | 0,26755845 | 0,06537953 | FALSE |
| Rv1077  | 91  | 41  | 1,150242636  | 0,660103196  | 2,546995159  | 0,010865 | 0,01961616 | 0,00479333 | FALSE |
| Rv1079  | 13  | 19  | -0,547487795 | -1,037627235 | -2,030729954 | 0,042282 | 0,06639033 | 0,01622288 | FALSE |
| Rv1081c | 10  | 3   | 1,736965594  | 1,246826154  | 1,440514091  | 0,149722 | 0,20428527 | 0,04986607 | FALSE |
| Rv1083  | 12  | 5   | 1,263034406  | 0,772894966  | 1,061917443  | 0,288273 | 0,36091911 | 0,08810802 | FALSE |
| Rv1085c | 15  | 3   | 2,321928095  | 1,831788655  | 2,342126898  | 0,019174 | 0,03259697 | 0,00795239 | FALSE |
| Rv1086  | 89  | 46  | 0,952171475  | 0,462032035  | 1,824611959  | 0,06806  | 0,10194583 | 0,02491108 | FALSE |
| Rv1087A | 10  | 0   | 4,321928095  | 3,831788655  | 2,828613894  | 0,004675 | 0,00909158 | 0,00221937 | FALSE |
| Rv1088  | 1   | 1   | 0            | -0,49013944  | -0,241962819 | 0,808809 | 0,84800619 | 0,20685444 | FALSE |
| Rv1089  | 2   | 0   | NA           | NA           | NA           | NA       | NA         | NA         | FALSE |
| Rv1089A | NA  | NA  | NA           | NA           | NA           | NA       | NA         | NA         | FALSE |
| Rv1090  | 8   | 2   | 2            | 1,50986056   | 1,490724428  | 0,136034 | 0,18800645 | 0,04583507 | FALSE |
| Rv1091  | 32  | 10  | 1,678071905  | 1,187932465  | 2,480372686  | 0,013125 | 0,02330131 | 0,00569252 | FALSE |
| Rv1092c | 13  | 25  | -0,943416472 | -1,433555912 | -3,00485308  | 0,002657 | 0,00544669 | 0,00133093 | FALSE |
| Rv1095  | 276 | 222 | 0,31410859   | -0,17603085  | -1,367604313 | 0,171436 | 0,23029152 | 0,05627313 | FALSE |
| Rv1097c | 16  | 5   | 1,678071905  | 1,187932465  | 1,753869718  | 0,079453 | 0,11664034 | 0,02845898 | FALSE |
| Rv1098c | 24  | 20  | 0,263034406  | -0,227105034 | -0,524779472 | 0,599737 | 0,67608864 | 0,16520635 | FALSE |
| Rv1099c | 9   | 8   | 0,169925001  | -0,320214439 | -0,460475873 | 0,645175 | 0,71563901 | 0,17479625 | FALSE |
| Rv1100  | 30  | 20  | 0,584962501  | 0,094823061  | 0,231682315  | 0,816785 | 0,85133979 | 0,20799309 | FALSE |
| Rv1101c | 57  | 56  | 0,025535092  | -0,464604348 | -1,724076761 | 0,084694 | 0,12303944 | 0,03006543 | FALSE |
| Rv1103c | 50  | 38  | 0,395928676  | -0,094210764 | -0,307071757 | 0,758789 | 0,81068949 | 0,19809688 | FALSE |
| Rv1104  | 14  | 7   | 1            | 0,50986056   | 0,7919386    | 0,428396 | 0,50410976 | 0,12312662 | FALSE |
| Rv1105  | 0   | 1   | NA           | NA           | NA           | NA       | NA         | NA         | FALSE |
| Rv1107c | 9   | 4   | 1,169925001  | 0,679785561  | 0,82201383   | 0,411069 | 0,48532866 | 0,11853923 | FALSE |
| Rv1111c | 33  | 35  | -0,084888898 | -0,575028338 | -1,654934233 | 0,097938 | 0,1399368  | 0,0341944  | FALSE |
| Rv1112  | 17  | 23  | -0,436099115 | -0,926238555 | -2,033319898 | 0,04202  | 0,06604505 | 0,01613526 | FALSE |
| Rv1115  | 14  | 14  | 0            | -0,49013944  | -0,905355944 | 0,365277 | 0,44113378 | 0,10777704 | FALSE |
| Rv1116  | 12  | 0   | 4,584962501  | 4,094823061  | 3,163753838  | 0,001557 | 0,00330363 | 0,00080682 | FALSE |

|         |     |      |              |              |              |          |            |            |       |
|---------|-----|------|--------------|--------------|--------------|----------|------------|------------|-------|
| Rv1116A | 2   | 1    | 1            | 0,50986056   | 0,29932164   | 0,764695 | 0,81465901 | 0,19872219 | FALSE |
| Rv1117  | 219 | 111  | 0,980371193  | 0,490231753  | 3,022401124  | 0,002508 | 0,00517868 | 0,00126544 | FALSE |
| Rv1118c | 5   | 4    | 0,321928095  | -0,168211345 | -0,175607701 | 0,860602 | 0,88718358 | 0,2165029  | FALSE |
| Rv1119c | 3   | 0 NA | NA           | NA           | NA           | NA       | NA         | NA         | FALSE |
| Rv1120c | 1   | 1    | 0            | -0,49013944  | -0,241962819 | 0,808809 | 0,84800619 | 0,20685444 | FALSE |
| Rv1121  | 37  | 52   | -0,490986353 | -0,981125793 | -3,207946013 | 0,001337 | 0,00285896 | 0,0006986  | FALSE |
| Rv1124  | 7   | 19   | -1,440572591 | -1,930712031 | -3,23679228  | 0,001209 | 0,00260581 | 0,00063657 | FALSE |
| Rv1125  | 3   | 4    | -0,415037499 | -0,905176939 | -0,831685343 | 0,405587 | 0,48052657 | 0,11734837 | FALSE |
| Rv1131  | 196 | 172  | 0,188445089  | -0,301694351 | -2,018535942 | 0,043535 | 0,06808411 | 0,01663676 | FALSE |
| Rv1132  | 67  | 66   | 0,021695071  | -0,468444369 | -1,885929583 | 0,059304 | 0,09025092 | 0,02205336 | FALSE |
| Rv1134  | 4   | 0 NA | NA           | NA           | NA           | NA       | NA         | NA         | FALSE |
| Rv1135A | 1   | 1    | 0            | -0,49013944  | -0,241962819 | 0,808809 | 0,84800619 | 0,20685444 | FALSE |
| Rv1136  | 5   | 2    | 1,321928095  | 0,831788655  | 0,730202124  | 0,465267 | 0,54186288 | 0,13217096 | FALSE |
| Rv1137c | 0   | 1 NA | NA           | NA           | NA           | NA       | NA         | NA         | FALSE |
| Rv1138c | 4   | 11   | -1,459431619 | -1,949571059 | -2,478757995 | 0,013184 | 0,0233911  | 0,00571576 | FALSE |
| Rv1139c | 32  | 47   | -0,554588852 | -1,044728292 | -3,211913086 | 0,001319 | 0,00282132 | 0,00068941 | FALSE |
| Rv1142c | 10  | 3    | 1,736965594  | 1,246826154  | 1,440514091  | 0,149722 | 0,20428527 | 0,04986607 | FALSE |
| Rv1143  | 16  | 5    | 1,678071905  | 1,187932465  | 1,753869718  | 0,079453 | 0,11664034 | 0,02845898 | FALSE |
| Rv1144  | 15  | 9    | 0,736965594  | 0,246826154  | 0,415345089  | 0,677889 | 0,7419164  | 0,1811902  | FALSE |
| Rv1145  | 8   | 9    | -0,169925001 | -0,660064441 | -0,949188147 | 0,342525 | 0,41688011 | 0,10181958 | FALSE |
| Rv1148c | 62  | 24   | 1,36923381   | 0,87909437   | 2,695470571  | 0,007029 | 0,01322156 | 0,00323077 | FALSE |
| Rv1152  | 74  | 31   | 1,255257055  | 0,765117615  | 2,614145312  | 0,008945 | 0,01636861 | 0,00399977 | FALSE |
| Rv1153c | 17  | 25   | -0,556393349 | -1,046532789 | -2,345790229 | 0,018987 | 0,03241242 | 0,00791844 | FALSE |
| Rv1157c | 5   | 2    | 1,321928095  | 0,831788655  | 0,730202124  | 0,465267 | 0,54186288 | 0,13217096 | FALSE |
| Rv1158c | 4   | 1    | 2            | 1,50986056   | 1,054098848  | 0,291838 | 0,3631117  | 0,08848889 | FALSE |
| Rv1159A | 31  | 10   | 1,632268215  | 1,142128775  | 2,365881815  | 0,017987 | 0,03098366 | 0,00756437 | FALSE |
| Rv1160  | 4   | 3    | 0,415037499  | -0,075101941 | -0,069004391 | 0,944986 | 0,95612665 | 0,23342365 | FALSE |
| Rv1163  | 23  | 17   | 0,436099115  | -0,054040325 | -0,118631715 | 0,905567 | 0,92571719 | 0,2262046  | FALSE |
| Rv1164  | 72  | 68   | 0,08246216   | -0,40767728  | -1,683609695 | 0,092257 | 0,13254749 | 0,03238878 | FALSE |
| Rv1166  | 122 | 67   | 0,864648147  | 0,374508707  | 1,758108515  | 0,078729 | 0,11623324 | 0,02833413 | FALSE |
| Rv1170  | 35  | 13   | 1,428843299  | 0,938703859  | 2,14028162   | 0,032332 | 0,05228013 | 0,01277497 | FALSE |
| Rv1172c | 133 | 136  | -0,032180406 | -0,522319846 | -2,990763034 | 0,002783 | 0,00567461 | 0,00138663 | FALSE |
| Rv1176c | 3   | 2    | 0,584962501  | 0,094823061  | 0,073262463  | 0,941597 | 0,95430504 | 0,2331297  | FALSE |
| Rv1177  | 188 | 119  | 0,659771088  | 0,169631648  | 1,024327199  | 0,305681 | 0,37768813 | 0,09227578 | FALSE |
| Rv1182  | 4   | 10   | -1,321928095 | -1,812067535 | -2,249681867 | 0,024469 | 0,0406345  | 0,00992246 | FALSE |
| Rv1188  | 10  | 6    | 0,736965594  | 0,246826154  | 0,339126285  | 0,734515 | 0,79124952 | 0,19318673 | FALSE |
| Rv1189  | 11  | 17   | -0,628031223 | -1,118170663 | -2,041286749 | 0,041222 | 0,06513179 | 0,01591213 | FALSE |

|         |     |     |              |              |              |          |            |            |       |
|---------|-----|-----|--------------|--------------|--------------|----------|------------|------------|-------|
| Rv1190  | 7   | 4   | 0,807354922  | 0,317215482  | 0,360226021  | 0,718678 | 0,78010787 | 0,19054463 | FALSE |
| Rv1191  | 6   | 4   | 0,584962501  | 0,094823061  | 0,10360907   | 0,91748  | 0,9353238  | 0,22834339 | FALSE |
| Rv1192  | 66  | 25  | 1,40053793   | 0,91039849   | 2,864520488  | 0,004176 | 0,00823681 | 0,00201271 | FALSE |
| Rv1193  | 34  | 30  | 0,180572246  | -0,309567194 | -0,863674136 | 0,387767 | 0,46320888 | 0,11318789 | FALSE |
| Rv1196  | 54  | 68  | -0,332575339 | -0,822714779 | -3,16180214  | 0,001568 | 0,00332224 | 0,00081181 | FALSE |
| Rv1197  | 51  | 34  | 0,584962501  | 0,094823061  | 0,302082932  | 0,762589 | 0,81385882 | 0,19872219 | FALSE |
| Rv1201c | 46  | 33  | 0,479167837  | -0,010971603 | -0,033809333 | 0,973029 | 0,9779125  | 0,23892809 | FALSE |
| Rv1202  | 44  | 43  | 0,033166864  | -0,456972576 | -1,487891707 | 0,136779 | 0,18853645 | 0,04607002 | FALSE |
| Rv1203c | 31  | 13  | 1,253756592  | 0,763617152  | 1,689043203  | 0,091211 | 0,13133464 | 0,03208058 | FALSE |
| Rv1204c | 28  | 18  | 0,637429921  | 0,147290481  | 0,344526284  | 0,730451 | 0,79101756 | 0,19316621 | FALSE |
| Rv1205  | 29  | 34  | -0,229481846 | -0,719621286 | -1,990755357 | 0,046508 | 0,07215452 | 0,01762439 | FALSE |
| Rv1207  | 39  | 42  | -0,106915204 | -0,597054644 | -1,8751754   | 0,060769 | 0,09233516 | 0,02256266 | FALSE |
| Rv1208  | 34  | 10  | 1,765534746  | 1,275395306  | 2,703662777  | 0,006858 | 0,01294992 | 0,00316286 | FALSE |
| Rv1209  | 13  | 13  | 0            | -0,49013944  | -0,872421781 | 0,382978 | 0,45832986 | 0,11199567 | FALSE |
| Rv1211  | 95  | 56  | 0,762500686  | 0,272361246  | 1,148389752  | 0,250808 | 0,3192321  | 0,07800629 | FALSE |
| Rv1212c | 15  | 5   | 1,584962501  | 1,094823061  | 1,590531181  | 0,111715 | 0,15717801 | 0,03837283 | FALSE |
| Rv1213  | 23  | 31  | -0,430634354 | -0,920773794 | -2,348916469 | 0,018828 | 0,03217674 | 0,00786258 | FALSE |
| Rv1214c | 4   | 1   | 2            | 1,50986056   | 1,054098848  | 0,291838 | 0,3631117  | 0,08848889 | FALSE |
| Rv1216c | 32  | 13  | 1,299560282  | 0,809420842  | 1,804623893  | 0,071134 | 0,10606206 | 0,02590701 | FALSE |
| Rv1218c | 5   | 7   | -0,485426827 | -0,975566267 | -1,171400233 | 0,241438 | 0,30826063 | 0,07531304 | FALSE |
| Rv1219c | 17  | 23  | -0,436099115 | -0,926238555 | -2,033319898 | 0,04202  | 0,06604505 | 0,01613526 | FALSE |
| Rv1220c | 11  | 4   | 1,459431619  | 0,969292179  | 1,232394544  | 0,217802 | 0,28246954 | 0,06881664 | FALSE |
| Rv1224  | 297 | 192 | 0,62935662   | 0,13921718   | 1,062328682  | 0,288086 | 0,36114856 | 0,08810802 | FALSE |
| Rv1227c | 14  | 18  | -0,362570079 | -0,852709519 | -1,677211773 | 0,093501 | 0,13423592 | 0,03280136 | FALSE |
| Rv1230c | 33  | 17  | 0,956931278  | 0,466791838  | 1,121513881  | 0,262069 | 0,33226629 | 0,08119128 | FALSE |
| Rv1231c | 13  | 26  | -1           | -1,49013944  | -3,154234916 | 0,001609 | 0,00340591 | 0,00083226 | FALSE |
| Rv1235  | 51  | 27  | 0,91753784   | 0,4273984    | 1,285328045  | 0,198678 | 0,26210686 | 0,06394851 | FALSE |
| Rv1236  | 40  | 16  | 1,321928095  | 0,831788655  | 2,065377787  | 0,038887 | 0,06181754 | 0,015092   | FALSE |
| Rv1237  | 24  | 5   | 2,263034406  | 1,772894966  | 2,896759478  | 0,00377  | 0,00751    | 0,00183465 | FALSE |
| Rv1240  | 30  | 23  | 0,38332864   | -0,1068108   | -0,270252337 | 0,786966 | 0,8348554  | 0,20400197 | FALSE |
| Rv1243c | 8   | 3   | 1,415037499  | 0,924898059  | 1,01059623   | 0,31221  | 0,38484184 | 0,09391985 | FALSE |
| Rv1244  | 22  | 32  | -0,540568381 | -1,030707821 | -2,621023345 | 0,008767 | 0,01606461 | 0,00392548 | FALSE |
| Rv1245c | 47  | 21  | 1,162271429  | 0,672131989  | 1,859852595  | 0,062906 | 0,09495533 | 0,02320005 | FALSE |
| Rv1246c | 7   | 6   | 0,222392421  | -0,267747019 | -0,336487378 | 0,736503 | 0,79208087 | 0,19349646 | FALSE |
| Rv1247c | 18  | 24  | -0,415037499 | -0,905176939 | -2,03724662  | 0,041625 | 0,06566226 | 0,01601735 | FALSE |
| Rv1251c | 46  | 19  | 1,275634443  | 0,785495003  | 2,108458222  | 0,034991 | 0,05620786 | 0,01372612 | FALSE |
| Rv1254  | 14  | 20  | -0,514573173 | -1,004712613 | -2,028936526 | 0,042465 | 0,0665696  | 0,01626016 | FALSE |



|         |      |      |              |              |              |          |            |            |       |
|---------|------|------|--------------|--------------|--------------|----------|------------|------------|-------|
| Rv1257c | 28   | 16   | 0,807354922  | 0,317215482  | 0,720465623  | 0,471238 | 0,54742995 | 0,13374793 | FALSE |
| Rv1258c | 31   | 9    | 1,784271309  | 1,294131869  | 2,611058884  | 0,009026 | 0,01649389 | 0,0040285  | FALSE |
| Rv1260  | 110  | 61   | 0,850622376  | 0,360482936  | 1,610779371  | 0,107228 | 0,15171182 | 0,0370717  | FALSE |
| Rv1261c | 20   | 28   | -0,485426827 | -0,975566267 | -2,342849844 | 0,019137 | 0,03261196 | 0,00795239 | FALSE |
| Rv1262c | 9    | 7    | 0,362570079  | -0,127569361 | -0,1774247   | 0,859175 | 0,88805654 | 0,2165029  | FALSE |
| Rv1265  | 337  | 283  | 0,251946538  | -0,238192902 | -2,067143809 | 0,038721 | 0,06159021 | 0,01504994 | FALSE |
| Rv1266c | 38   | 16   | 1,247927513  | 0,757788073  | 1,857654081  | 0,063218 | 0,0953154  | 0,02329089 | FALSE |
| Rv1267c | 13   | 14   | -0,106915204 | -0,597054644 | -1,082598333 | 0,278987 | 0,35086739 | 0,08573657 | FALSE |
| Rv1268c | 2    | 0    | NA           | NA           | NA           | NA       | NA         | NA         | FALSE |
| Rv1269c | 4    | 2    | 1            | 0,50986056   | 0,423305433  | 0,672072 | 0,73990495 | 0,18064746 | FALSE |
| Rv1270c | 23   | 4    | 2,523561956  | 2,033422516  | 3,10890893   | 0,001878 | 0,00394979 | 0,0009649  | FALSE |
| Rv1271c | 2    | 1    | 1            | 0,50986056   | 0,29932164   | 0,764695 | 0,81465901 | 0,19872219 | FALSE |
| Rv1272c | 19   | 29   | -0,610053482 | -1,100192922 | -2,631463321 | 0,008502 | 0,01563067 | 0,00381296 | FALSE |
| Rv1273c | 3    | 3    | 0            | -0,49013944  | -0,419092891 | 0,675148 | 0,74088911 | 0,18081208 | FALSE |
| Rv1276c | 4    | 4    | 0            | -0,49013944  | -0,483927361 | 0,628437 | 0,70115661 | 0,17118513 | FALSE |
| Rv1277  | 28   | 36   | -0,362570079 | -0,852709519 | -2,371980352 | 0,017693 | 0,03063236 | 0,00748354 | FALSE |
| Rv1278  | 26   | 30   | -0,206450877 | -0,696590318 | -1,817372519 | 0,06916  | 0,10339593 | 0,02525575 | FALSE |
| Rv1279  | 24   | 13   | 0,884522783  | 0,394383343  | 0,818266536  | 0,413205 | 0,48726123 | 0,11904725 | FALSE |
| Rv1280c | 11   | 22   | -1           | -1,49013944  | -2,901464375 | 0,003714 | 0,00741138 | 0,00181102 | FALSE |
| Rv1283c | 50   | 19   | 1,395928676  | 0,905789236  | 2,482575252  | 0,013044 | 0,02317355 | 0,0056626  | FALSE |
| Rv1285  | 1861 | 1225 | 0,603296306  | 0,113156866  | 2,174503262  | 0,029667 | 0,04831153 | 0,01180521 | FALSE |
| Rv1287  | 142  | 126  | 0,172467196  | -0,317672244 | -1,814017431 | 0,069675 | 0,10404629 | 0,02542434 | FALSE |
| Rv1289  | 74   | 49   | 0,594743522  | 0,104604081  | 0,400742226  | 0,68861  | 0,75196357 | 0,18374685 | FALSE |
| Rv1290A | 1    | 3    | -1,584962501 | -2,075101941 | -1,348183825 | 0,177599 | 0,23702158 | 0,05781885 | FALSE |
| Rv1291c | NA   | NA   | NA           | NA           | NA           | NA       | NA         | NA         | FALSE |
| Rv1312  | 47   | 48   | -0,030373649 | -0,520513089 | -1,771003397 | 0,07656  | 0,11328811 | 0,02768264 | FALSE |
| Rv1313c | 25   | 23   | 0,120294234  | -0,369845206 | -0,894082904 | 0,371278 | 0,44665397 | 0,1091426  | FALSE |
| Rv1314c | 23   | 10   | 1,201633861  | 0,711494421  | 1,367854011  | 0,171358 | 0,23030532 | 0,05626682 | FALSE |
| Rv1315  | 95   | 51   | 0,897430266  | 0,407290826  | 1,677615548  | 0,093422 | 0,13417197 | 0,03278573 | FALSE |
| Rv1318c | 29   | 34   | -0,229481846 | -0,719621286 | -1,990755357 | 0,046508 | 0,07215452 | 0,01762439 | FALSE |
| Rv1322  | 3    | 2    | 0,584962501  | 0,094823061  | 0,073262463  | 0,941597 | 0,95430504 | 0,2331297  | FALSE |
| Rv1323  | 324  | 262  | 0,306427001  | -0,183712439 | -1,548563132 | 0,121487 | 0,17009891 | 0,0415647  | FALSE |
| Rv1325c | 5    | 11   | -1,137503524 | -1,627642964 | -2,188175297 | 0,028657 | 0,04680257 | 0,01143171 | FALSE |
| Rv1327c | 154  | 98   | 0,652076697  | 0,161937257  | 0,886186868  | 0,375517 | 0,4513368  | 0,11028688 | FALSE |
| Rv1329c | 13   | 15   | -0,206450877 | -0,696590318 | -1,285055122 | 0,198773 | 0,26192295 | 0,06394851 | FALSE |
| Rv1331  | 412  | 243  | 0,761688024  | 0,271548584  | 2,385421465  | 0,01706  | 0,02960782 | 0,00723485 | FALSE |
| Rv1335  | 52   | 46   | 0,176877762  | -0,313261678 | -1,081561593 | 0,279447 | 0,35133355 | 0,08585048 | FALSE |

|         |     |     |              |              |              |          |            |            |       |
|---------|-----|-----|--------------|--------------|--------------|----------|------------|------------|-------|
| Rv1338  | 11  | 24  | -1,125530882 | -1,615670322 | -3,215071071 | 0,001304 | 0,00279429 | 0,00068261 | FALSE |
| Rv1341  | 12  | 8   | 0,584962501  | 0,094823061  | 0,146526204  | 0,883506 | 0,90672561 | 0,22144749 | FALSE |
| Rv1342c | 19  | 23  | -0,275634443 | -0,765773883 | -1,728463287 | 0,083905 | 0,12198429 | 0,0298076  | FALSE |
| Rv1345  | 43  | 40  | 0,10433666   | -0,38580278  | -1,226584078 | 0,219979 | 0,28359783 | 0,06929885 | FALSE |
| Rv1347c | 35  | 27  | 0,374395515  | -0,115743925 | -0,316811167 | 0,751387 | 0,80432177 | 0,19654089 | FALSE |
| Rv1348  | 53  | 56  | -0,079434467 | -0,569573908 | -2,075499468 | 0,03794  | 0,06042282 | 0,01476468 | FALSE |
| Rv1352  | 42  | 19  | 1,144389909  | 0,654250469  | 1,716673896  | 0,086039 | 0,12473785 | 0,03047479 | FALSE |
| Rv1354c | 6   | 10  | -0,736965594 | -1,227105034 | -1,685978429 | 0,0918   | 0,13201209 | 0,03224289 | FALSE |
| Rv1356c | 16  | 21  | -0,392317423 | -0,882456863 | -1,865160573 | 0,062159 | 0,09422768 | 0,0230251  | FALSE |
| Rv1359  | 8   | 1   | 3            | 2,50986056   | 2,083780734  | 0,03718  | 0,05934533 | 0,01449251 | FALSE |
| Rv1361c | 28  | 36  | -0,362570079 | -0,852709519 | -2,371980352 | 0,017693 | 0,03063236 | 0,00748354 | FALSE |
| Rv1362c | 18  | 4   | 2,169925001  | 1,679785561  | 2,415571032  | 0,015711 | 0,02738216 | 0,00668354 | FALSE |
| Rv1363c | 63  | 54  | 0,222392421  | -0,267747019 | -1,009524288 | 0,312723 | 0,38486742 | 0,09404468 | FALSE |
| Rv1365c | 18  | 19  | -0,078002512 | -0,568141952 | -1,206150196 | 0,22776  | 0,29285518 | 0,07156093 | FALSE |
| Rv1366  | 16  | 8   | 1            | 0,50986056   | 0,846619397  | 0,397207 | 0,47239059 | 0,11537879 | FALSE |
| Rv1366A | 24  | 16  | 0,584962501  | 0,094823061  | 0,207221756  | 0,835837 | 0,8689942  | 0,21228747 | FALSE |
| Rv1367c | 5   | 11  | -1,137503524 | -1,627642964 | -2,188175297 | 0,028657 | 0,04680257 | 0,01143171 | FALSE |
| Rv1368  | 11  | 16  | -0,540568381 | -1,030707821 | -1,853314183 | 0,063837 | 0,09613761 | 0,02348042 | FALSE |
| Rv1369c | 8   | 18  | -1,169925001 | -1,660064441 | -2,838900868 | 0,004527 | 0,00885209 | 0,00216306 | FALSE |
| Rv1370c | 11  | 14  | -0,347923303 | -0,838062743 | -1,457443015 | 0,144994 | 0,19905153 | 0,0486309  | FALSE |
| Rv1371  | 4   | 6   | -0,584962501 | -1,075101941 | -1,174717535 | 0,240108 | 0,30676288 | 0,0749471  | FALSE |
| Rv1372  | 51  | 38  | 0,424497829  | -0,065641612 | -0,215015046 | 0,829756 | 0,86336146 | 0,2109676  | FALSE |
| Rv1374c | 39  | 13  | 1,584962501  | 1,094823061  | 2,564696669  | 0,010327 | 0,01875599 | 0,0045799  | FALSE |
| Rv1376  | 35  | 11  | 1,669851398  | 1,179711958  | 2,579762659  | 0,009887 | 0,0179907  | 0,00439614 | FALSE |
| Rv1380  | 3   | 3   | 0            | -0,49013944  | -0,419092891 | 0,675148 | 0,74088911 | 0,18081208 | FALSE |
| Rv1381  | 13  | 5   | 1,378511623  | 0,888372183  | 1,245248184  | 0,213041 | 0,27795633 | 0,0678523  | FALSE |
| Rv1382  | 4   | 5   | -0,321928095 | -0,812067535 | -0,847774643 | 0,396563 | 0,47241624 | 0,11533221 | FALSE |
| Rv1383  | 12  | 23  | -0,938599455 | -1,428738895 | -2,874863143 | 0,004042 | 0,00800818 | 0,00195685 | FALSE |
| Rv1385  | 2   | 5   | -1,321928095 | -1,812067535 | -1,59075933  | 0,111664 | 0,15738926 | 0,03837283 | FALSE |
| Rv1388  | 128 | 100 | 0,35614381   | -0,13399563  | -0,703687684 | 0,481627 | 0,55660094 | 0,13600881 | FALSE |
| Rv1391  | 403 | 312 | 0,36923381   | -0,12090563  | -1,124405215 | 0,260841 | 0,33081674 | 0,08083707 | FALSE |
| Rv1393c | 91  | 82  | 0,150242636  | -0,339896804 | -1,559674297 | 0,118837 | 0,16674739 | 0,04074573 | FALSE |
| Rv1394c | 104 | 45  | 1,208586622  | 0,718447182  | 2,933729453  | 0,003349 | 0,00673454 | 0,00164562 | FALSE |
| Rv1396c | 96  | 65  | 0,562594688  | 0,072455248  | 0,317932704  | 0,750536 | 0,80363121 | 0,19637215 | FALSE |
| Rv1399c | 18  | 3   | 2,584962501  | 2,094823061  | 2,803354658  | 0,005057 | 0,0097865  | 0,00239021 | FALSE |
| Rv1400c | 10  | 11  | -0,137503524 | -0,627642964 | -1,003447635 | 0,315645 | 0,38766896 | 0,09471436 | FALSE |
| Rv1402  | 18  | 31  | -0,784271309 | -1,274410749 | -3,057796836 | 0,00223  | 0,00463508 | 0,00113231 | FALSE |

|         |     |     |              |              |              |          |            |            |       |
|---------|-----|-----|--------------|--------------|--------------|----------|------------|------------|-------|
| Rv1404  | 71  | 33  | 1,105353     | 0,61521356   | 2,113111457  | 0,034591 | 0,05563375 | 0,01359444 | FALSE |
| Rv1406  | 9   | 1   | 3,169925001  | 2,679785561  | 2,291346064  | 0,021943 | 0,036919   | 0,0090175  | FALSE |
| Rv1408  | 25  | 20  | 0,321928095  | -0,168211345 | -0,392679099 | 0,694557 | 0,75729252 | 0,18502318 | FALSE |
| Rv1410c | 215 | 162 | 0,408342847  | -0,081796593 | -0,551757598 | 0,581114 | 0,65756357 | 0,16067964 | FALSE |
| Rv1411c | 68  | 33  | 1,043068722  | 0,552929282  | 1,87878984   | 0,060273 | 0,09161807 | 0,02238743 | FALSE |
| Rv1412  | 67  | 36  | 0,896164189  | 0,406024749  | 1,404755142  | 0,160094 | 0,2160966  | 0,05280451 | FALSE |
| Rv1413  | 3   | 10  | -1,736965594 | -2,227105034 | -2,57307418  | 0,01008  | 0,0183336  | 0,00447993 | FALSE |
| Rv1414  | 3   | 1   | 1,584962501  | 1,094823061  | 0,711301316  | 0,476898 | 0,55277082 | 0,13487273 | FALSE |
| Rv1416  | 15  | 13  | 0,206450877  | -0,283688563 | -0,523342675 | 0,600736 | 0,67672677 | 0,16532601 | FALSE |
| Rv1417  | 39  | 41  | -0,072149786 | -0,562289226 | -1,755379288 | 0,079194 | 0,11647998 | 0,02845898 | FALSE |
| Rv1418  | 32  | 8   | 2            | 1,50986056   | 2,981491342  | 0,002868 | 0,00583711 | 0,00142633 | FALSE |
| Rv1419  | 96  | 73  | 0,395137942  | -0,095001498 | -0,429141607 | 0,66782  | 0,7364693  | 0,17996073 | FALSE |
| Rv1422  | 13  | 15  | -0,206450877 | -0,696590318 | -1,285055122 | 0,198773 | 0,26192295 | 0,06394851 | FALSE |
| Rv1423  | 23  | 27  | -0,231325546 | -0,721464986 | -1,777990678 | 0,075405 | 0,11174878 | 0,02730649 | FALSE |
| Rv1424c | 6   | 4   | 0,584962501  | 0,094823061  | 0,10360907   | 0,91748  | 0,9353238  | 0,22834339 | FALSE |
| Rv1425  | 99  | 68  | 0,541893779  | 0,051754339  | 0,231448078  | 0,816967 | 0,85118864 | 0,20799309 | FALSE |
| Rv1426c | 3   | 8   | -1,415037499 | -1,905176939 | -2,081704695 | 0,037369 | 0,05958665 | 0,01455734 | FALSE |
| Rv1428c | 6   | 0   | 3,584962501  | 3,094823061  | 2,010691768  | 0,044358 | 0,06917655 | 0,01688348 | FALSE |
| Rv1430  | 18  | 32  | -0,830074999 | -1,320214439 | -3,19294138  | 0,001408 | 0,00300846 | 0,00073514 | FALSE |
| Rv1431  | 18  | 4   | 2,169925001  | 1,679785561  | 2,415571032  | 0,015711 | 0,02738216 | 0,00668354 | FALSE |
| Rv1432  | 8   | 15  | -0,906890596 | -1,397030036 | -2,282628173 | 0,022452 | 0,03766967 | 0,00920283 | FALSE |
| Rv1434  | 1   | 1   | 0            | -0,49013944  | -0,241962819 | 0,808809 | 0,84800619 | 0,20685444 | FALSE |
| Rv1435c | 17  | 21  | -0,304854582 | -0,794994022 | -1,705961123 | 0,088015 | 0,12708442 | 0,03104811 | FALSE |
| Rv1436  | 41  | 15  | 1,450661409  | 0,960521969  | 2,361387935  | 0,018207 | 0,03132029 | 0,00764997 | FALSE |
| Rv1437  | 54  | 26  | 1,054447784  | 0,564308344  | 1,705320616  | 0,088135 | 0,12718617 | 0,03107871 | FALSE |
| Rv1438  | 26  | 8   | 1,700439718  | 1,210300278  | 2,269054219  | 0,023265 | 0,03889957 | 0,00950331 | FALSE |
| Rv1440  | 21  | 21  | 0            | -0,49013944  | -1,108839266 | 0,2675   | 0,33876623 | 0,08276616 | FALSE |
| Rv1441c | 6   | 7   | -0,222392421 | -0,712531861 | -0,895464602 | 0,370539 | 0,44617759 | 0,108959   | FALSE |
| Rv1442  | 60  | 52  | 0,206450877  | -0,283688563 | -1,046737425 | 0,295221 | 0,36563172 | 0,08934432 | FALSE |
| Rv1444c | 30  | 11  | 1,447458977  | 0,957319537  | 2,014295787  | 0,043978 | 0,0687494  | 0,01679933 | FALSE |
| Rv1446c | 51  | 20  | 1,350497247  | 0,860357807  | 2,400347321  | 0,01638  | 0,02849088 | 0,00696192 | FALSE |
| Rv1447c | 27  | 11  | 1,295455884  | 0,805316443  | 1,65041452   | 0,098858 | 0,14112272 | 0,03447789 | FALSE |
| Rv1449c | 103 | 73  | 0,496675968  | 0,006536528  | 0,030051099  | 0,976026 | 0,9805461  | 0,23960237 | FALSE |
| Rv1450c | 20  | 6   | 1,736965594  | 1,246826154  | 2,037207815  | 0,041629 | 0,06558891 | 0,01601735 | FALSE |
| Rv1452c | 4   | 4   | 0            | -0,49013944  | -0,483927361 | 0,628437 | 0,70115661 | 0,17118513 | FALSE |
| Rv1453  | 7   | 1   | 2,807354922  | 2,317215482  | 1,860676038  | 0,06279  | 0,09498149 | 0,02317788 | FALSE |
| Rv1454c | 18  | 5   | 1,847996907  | 1,357857467  | 2,064658238  | 0,038955 | 0,06181253 | 0,015092   | FALSE |

|         |     |     |              |              |              |          |            |            |       |
|---------|-----|-----|--------------|--------------|--------------|----------|------------|------------|-------|
| Rv1456c | 9   | 3   | 1,584962501  | 1,094823061  | 1,232015087  | 0,217943 | 0,28199774 | 0,06881664 | FALSE |
| Rv1457c | 13  | 3   | 2,115477217  | 1,625337777  | 2,005125088  | 0,04495  | 0,06987599 | 0,01706783 | FALSE |
| Rv1458c | 5   | 8   | -0,678071905 | -1,168211345 | -1,4503344   | 0,146965 | 0,20136823 | 0,04918829 | FALSE |
| Rv1459c | 17  | 9   | 0,91753784   | 0,4273984    | 0,742062692  | 0,458049 | 0,53537346 | 0,13082174 | FALSE |
| Rv1461  | 975 | 629 | 0,632342202  | 0,142202762  | 1,966321639  | 0,049261 | 0,07624496 | 0,01863092 | FALSE |
| Rv1462  | 330 | 199 | 0,729697594  | 0,239558154  | 1,893709591  | 0,058264 | 0,08884    | 0,02170859 | FALSE |
| Rv1463  | 50  | 45  | 0,152003093  | -0,338136347 | -1,149715584 | 0,250261 | 0,31864015 | 0,07786165 | FALSE |
| Rv1464  | 116 | 124 | -0,096215315 | -0,586354755 | -3,170448474 | 0,001522 | 0,00323547 | 0,00079061 | FALSE |
| Rv1467c | 64  | 47  | 0,445411148  | -0,044728292 | -0,163534175 | 0,870098 | 0,89508224 | 0,21871876 | FALSE |
| Rv1470  | 16  | 13  | 0,299560282  | -0,190579158 | -0,357295169 | 0,720871 | 0,78183604 | 0,19101984 | FALSE |
| Rv1471  | 61  | 23  | 1,407175382  | 0,917035941  | 2,770757782  | 0,005593 | 0,01069758 | 0,00261338 | FALSE |
| Rv1472  | 387 | 330 | 0,229867542  | -0,260271898 | -2,429944486 | 0,015101 | 0,02642022 | 0,00645594 | FALSE |
| Rv1473A | 46  | 24  | 0,938599455  | 0,448460015  | 1,27617902   | 0,201892 | 0,26527228 | 0,06482089 | FALSE |
| Rv1477  | 52  | 18  | 1,530514717  | 1,040375277  | 2,840882245  | 0,004499 | 0,0088061  | 0,00215075 | FALSE |
| Rv1478  | 27  | 23  | 0,231325546  | -0,258813894 | -0,637825396 | 0,523587 | 0,59959196 | 0,14651392 | FALSE |
| Rv1479  | 192 | 143 | 0,425091164  | -0,065048276 | -0,413436721 | 0,679287 | 0,74282119 | 0,18151285 | FALSE |
| Rv1480  | 32  | 9   | 1,830074999  | 1,339935559  | 2,725017246  | 0,00643  | 0,01218264 | 0,0029769  | FALSE |
| Rv1481  | 22  | 9   | 1,289506617  | 0,799367177  | 1,480295214  | 0,138794 | 0,19124645 | 0,04673223 | FALSE |
| Rv1482c | 6   | 0   | 3,584962501  | 3,094823061  | 2,010691768  | 0,044358 | 0,06917655 | 0,01688348 | FALSE |
| Rv1483  | 57  | 43  | 0,406625259  | -0,083514181 | -0,290101553 | 0,771739 | 0,82003783 | 0,2003812  | FALSE |
| Rv1486c | 55  | 68  | -0,306103128 | -0,796242568 | -3,074137595 | 0,002111 | 0,00440145 | 0,00107552 | FALSE |
| Rv1489  | 78  | 32  | 1,285402219  | 0,795262779  | 2,775083384  | 0,005519 | 0,01056409 | 0,0025814  | FALSE |
| Rv1489A | 55  | 37  | 0,571906348  | 0,081766908  | 0,271125529  | 0,786294 | 0,83436956 | 0,20388325 | FALSE |
| Rv1491c | 29  | 7   | 2,050626073  | 1,560486633  | 2,9078358    | 0,003639 | 0,00728065 | 0,00177725 | FALSE |
| Rv1493  | 97  | 50  | 0,956056652  | 0,465917212  | 1,919590433  | 0,05491  | 0,08441819 | 0,02062809 | FALSE |
| Rv1494  | 12  | 1   | 3,584962501  | 3,094823061  | 2,843553417  | 0,004461 | 0,00875897 | 0,00213923 | FALSE |
| Rv1497  | 85  | 48  | 0,824428435  | 0,334288995  | 1,319011353  | 0,187165 | 0,24826106 | 0,06065768 | FALSE |
| Rv1498A | 12  | 4   | 1,584962501  | 1,094823061  | 1,42261141   | 0,154849 | 0,20995996 | 0,05126938 | FALSE |
| Rv1498c | 18  | 18  | 0            | -0,49013944  | -1,026582023 | 0,304617 | 0,37667215 | 0,09204212 | FALSE |
| Rv1499  | NA  | NA  | NA           | NA           | NA           | NA       | NA         | NA         | FALSE |
| Rv1500  | 43  | 28  | 0,618909833  | 0,128770393  | 0,374471703  | 0,708053 | 0,7708248  | 0,1883557  | FALSE |
| Rv1501  | 48  | 23  | 1,061400545  | 0,571261105  | 1,625633082  | 0,104028 | 0,14782689 | 0,0361224  | FALSE |
| Rv1503c | 33  | 12  | 1,459431619  | 0,969292179  | 2,134603595  | 0,032793 | 0,0529604  | 0,01294119 | FALSE |
| Rv1504c | 10  | 3   | 1,736965594  | 1,246826154  | 1,440514091  | 0,149722 | 0,20428527 | 0,04986607 | FALSE |
| Rv1505c | 14  | 6   | 1,222392421  | 0,732252981  | 1,094369965  | 0,273793 | 0,34539192 | 0,08427609 | FALSE |
| Rv1507A | 10  | 1   | 3,321928095  | 2,831788655  | 2,485941687  | 0,012921 | 0,02302358 | 0,00561698 | FALSE |
| Rv1508A | 6   | 5   | 0,263034406  | -0,227105034 | -0,262384616 | 0,793025 | 0,83979996 | 0,20496008 | FALSE |

|         |      |     |              |              |              |          |            |            |       |
|---------|------|-----|--------------|--------------|--------------|----------|------------|------------|-------|
| Rv1508c | 23   | 11  | 1,064130337  | 0,573990897  | 1,130112835  | 0,258429 | 0,32850391 | 0,08021969 | FALSE |
| Rv1509  | 24   | 16  | 0,584962501  | 0,094823061  | 0,207221756  | 0,835837 | 0,8689942  | 0,21228747 | FALSE |
| Rv1511  | 26   | 14  | 0,893084796  | 0,402945356  | 0,868880017  | 0,384913 | 0,46008091 | 0,11242355 | FALSE |
| Rv1512  | 17   | 10  | 0,765534746  | 0,275395306  | 0,49091235   | 0,623488 | 0,69752825 | 0,17042084 | FALSE |
| Rv1513  | 3    | 6   | -1           | -1,49013944  | -1,515219994 | 0,129717 | 0,18039306 | 0,04403309 | FALSE |
| Rv1514c | 5    | 0   | 3,321928095  | 2,831788655  | 1,757822924  | 0,078778 | 0,11610745 | 0,02833413 | FALSE |
| Rv1516c | 14   | 5   | 1,485426827  | 0,995287387  | 1,421201948  | 0,155258 | 0,21011357 | 0,05129808 | FALSE |
| Rv1518  | 13   | 2   | 2,700439718  | 2,210300278  | 2,463914956  | 0,013743 | 0,02428322 | 0,00593107 | FALSE |
| Rv1519  | 2    | 4   | -1           | -1,49013944  | -1,237169867 | 0,216024 | 0,28100394 | 0,06859646 | FALSE |
| Rv1520  | 93   | 46  | 1,015596855  | 0,525457415  | 2,098021443  | 0,035903 | 0,05738936 | 0,01402344 | FALSE |
| Rv1521  | 33   | 43  | -0,381870635 | -0,872010075 | -2,642195802 | 0,008237 | 0,01524438 | 0,00372506 | FALSE |
| Rv1523  | 15   | 22  | -0,552541023 | -1,042680463 | -2,19390369  | 0,028242 | 0,04622226 | 0,01129006 | FALSE |
| Rv1525  | 30   | 7   | 2,099535674  | 1,609396234  | 3,024501099  | 0,00249  | 0,00515103 | 0,00125802 | FALSE |
| Rv1530  | 24   | 29  | -0,273018494 | -0,763157934 | -1,935124041 | 0,052975 | 0,08163681 | 0,01994845 | FALSE |
| Rv1536  | 1071 | 777 | 0,462971976  | -0,027167464 | -0,40550961  | 0,685103 | 0,74897174 | 0,18301577 | FALSE |
| Rv1537  | 32   | 20  | 0,678071905  | 0,187932465  | 0,46664683   | 0,640753 | 0,711239   | 0,17379555 | FALSE |
| Rv1539  | 215  | 169 | 0,347313413  | -0,142826027 | -0,973678189 | 0,330216 | 0,40372412 | 0,09865243 | FALSE |
| Rv1540  | 66   | 42  | 0,652076697  | 0,161937257  | 0,580097117  | 0,561849 | 0,63742616 | 0,15575894 | FALSE |
| Rv1545  | 14   | 4   | 1,807354922  | 1,317215482  | 1,778837029  | 0,075266 | 0,11164886 | 0,02726654 | FALSE |
| Rv1546  | 31   | 22  | 0,494764692  | 0,004625252  | 0,011668725  | 0,99069  | 0,99361606 | 0,24276492 | FALSE |
| Rv1548c | 38   | 13  | 1,547487795  | 1,057348355  | 2,460876181  | 0,01386  | 0,02441254 | 0,00596535 | FALSE |
| Rv1549  | 6    | 0   | 3,584962501  | 3,094823061  | 2,010691768  | 0,044358 | 0,06917655 | 0,01688348 | FALSE |
| Rv1550  | 27   | 5   | 2,432959407  | 1,942819967  | 3,269267531  | 0,001078 | 0,00235493 | 0,00057544 | FALSE |
| Rv1554  | 4    | 0   | NA           | NA           | NA           | NA       | NA         | NA         | FALSE |
| Rv1555  | 0    | 1   | NA           | NA           | NA           | NA       | NA         | NA         | FALSE |
| Rv1556  | 29   | 11  | 1,398549376  | 0,908409936  | 1,895253148  | 0,058059 | 0,08857976 | 0,02164077 | FALSE |
| Rv1560  | 5    | 14  | -1,485426827 | -1,975566267 | -2,82097278  | 0,004788 | 0,00929017 | 0,00226954 | FALSE |
| Rv1565c | 37   | 19  | 0,961525852  | 0,471386412  | 1,198279236  | 0,230808 | 0,29628748 | 0,07239964 | FALSE |
| Rv1566c | 11   | 1   | 3,459431619  | 2,969292179  | 2,669508357  | 0,007596 | 0,01423725 | 0,00347479 | FALSE |
| Rv1567c | 9    | 5   | 0,847996907  | 0,357857467  | 0,457556932  | 0,647271 | 0,71694581 | 0,1750659  | FALSE |
| Rv1568  | 19   | 31  | -0,706268797 | -1,196408237 | -2,909706628 | 0,003618 | 0,00724836 | 0,00177118 | FALSE |
| Rv1569  | 17   | 8   | 1,087462841  | 0,597323401  | 1,006998305  | 0,313936 | 0,3862377  | 0,09436113 | FALSE |
| Rv1570  | 10   | 17  | -0,765534746 | -1,255674186 | -2,238331413 | 0,025199 | 0,04154691 | 0,0101501  | FALSE |
| Rv1571  | 1    | 3   | -1,584962501 | -2,075101941 | -1,348183825 | 0,177599 | 0,23702158 | 0,05781885 | FALSE |
| Rv1572c | 0    | 3   | NA           | NA           | NA           | NA       | NA         | NA         | FALSE |
| Rv1574  | 2    | 6   | -1,584962501 | -2,075101941 | -1,906623771 | 0,056569 | 0,08645918 | 0,02111856 | FALSE |
| Rv1575  | 2    | 4   | -1           | -1,49013944  | -1,237169867 | 0,216024 | 0,28100394 | 0,06859646 | FALSE |

|         |     |     |              |              |              |          |            |            |       |
|---------|-----|-----|--------------|--------------|--------------|----------|------------|------------|-------|
| Rv1579c | 5   | 0   | 3,321928095  | 2,831788655  | 1,757822924  | 0,078778 | 0,11610745 | 0,02833413 | FALSE |
| Rv1581c | 2   | 1   | 1            | 0,50986056   | 0,29932164   | 0,764695 | 0,81465901 | 0,19872219 | FALSE |
| Rv1583c | 14  | 5   | 1,485426827  | 0,995287387  | 1,421201948  | 0,155258 | 0,21011357 | 0,05129808 | FALSE |
| Rv1584c | 77  | 37  | 1,057333175  | 0,567193735  | 2,045787567  | 0,040777 | 0,06446772 | 0,01575308 | FALSE |
| Rv1587c | 8   | 2   | 2            | 1,50986056   | 1,490724428  | 0,136034 | 0,18800645 | 0,04583507 | FALSE |
| Rv1588c | 28  | 12  | 1,222392421  | 0,732252981  | 1,547689692  | 0,121697 | 0,17027119 | 0,04159189 | FALSE |
| Rv1599  | 52  | 50  | 0,056583528  | -0,433555912 | -1,528421775 | 0,126408 | 0,17635679 | 0,04309385 | FALSE |
| Rv1603  | 41  | 48  | -0,227410496 | -0,717549936 | -2,359444423 | 0,018302 | 0,03143636 | 0,00767998 | FALSE |
| Rv1605  | 11  | 5   | 1,137503524  | 0,647364084  | 0,870305176  | 0,384134 | 0,45957166 | 0,11225105 | FALSE |
| Rv1608c | 8   | 10  | -0,321928095 | -0,812067535 | -1,198940765 | 0,230551 | 0,29620055 | 0,07234269 | FALSE |
| Rv1609  | 43  | 22  | 0,966833136  | 0,476693696  | 1,305138269  | 0,191846 | 0,25377972 | 0,06201261 | FALSE |
| Rv1610  | 29  | 31  | -0,096215315 | -0,586354755 | -1,585054892 | 0,112954 | 0,15866361 | 0,03877041 | FALSE |
| Rv1611  | 30  | 31  | -0,047305715 | -0,537445155 | -1,46520734  | 0,142864 | 0,19636935 | 0,04798404 | FALSE |
| Rv1612  | 19  | 28  | -0,559427409 | -1,049566849 | -2,488446894 | 0,01283  | 0,02293526 | 0,00560309 | FALSE |
| Rv1613  | 7   | 16  | -1,192645078 | -1,682784518 | -2,7025077   | 0,006882 | 0,01298244 | 0,00317234 | FALSE |
| Rv1614  | 42  | 52  | -0,308122295 | -0,798261735 | -2,694083436 | 0,007058 | 0,01327032 | 0,00324268 | FALSE |
| Rv1615  | 85  | 76  | 0,161463423  | -0,328676017 | -1,454775801 | 0,145731 | 0,19988791 | 0,04884382 | FALSE |
| Rv1616  | 29  | 7   | 2,050626073  | 1,560486633  | 2,9078358    | 0,003639 | 0,00728065 | 0,00177725 | FALSE |
| Rv1617  | 124 | 83  | 0,579156879  | 0,089017439  | 0,442670758  | 0,658004 | 0,72728707 | 0,17771699 | FALSE |
| Rv1619  | 57  | 24  | 1,247927513  | 0,757788073  | 2,275185621  | 0,022895 | 0,03833799 | 0,00936812 | FALSE |
| Rv1621c | 37  | 10  | 1,887525271  | 1,397385831  | 3,025555718  | 0,002482 | 0,00513855 | 0,00125563 | FALSE |
| Rv1624c | 8   | 3   | 1,415037499  | 0,924898059  | 1,01059623   | 0,31221  | 0,38484184 | 0,09391985 | FALSE |
| Rv1625c | 39  | 47  | -0,269186633 | -0,759326073 | -2,452841459 | 0,014173 | 0,02493093 | 0,00609202 | FALSE |
| Rv1632c | 13  | 6   | 1,115477217  | 0,625337777  | 0,917426625  | 0,358919 | 0,434733   | 0,10616378 | FALSE |
| Rv1633  | 105 | 98  | 0,099535674  | -0,390603766 | -1,942321241 | 0,052098 | 0,08034896 | 0,01963375 | FALSE |
| Rv1634  | 42  | 28  | 0,584962501  | 0,094823061  | 0,274133401  | 0,783982 | 0,83236817 | 0,2033942  | FALSE |
| Rv1635c | 39  | 25  | 0,641546029  | 0,151406589  | 0,417676944  | 0,676183 | 0,74067206 | 0,1809877  | FALSE |
| Rv1637c | 8   | 8   | 0            | -0,49013944  | -0,684379888 | 0,493735 | 0,56958239 | 0,1391398  | FALSE |
| Rv1638  | 162 | 130 | 0,31748219   | -0,17265725  | -1,026958123 | 0,30444  | 0,37657235 | 0,09201773 | FALSE |
| Rv1638A | 8   | 2   | 2            | 1,50986056   | 1,490724428  | 0,136034 | 0,18800645 | 0,04583507 | FALSE |
| Rv1641  | 202 | 125 | 0,692427198  | 0,202287758  | 1,259056965  | 0,20801  | 0,27239373 | 0,06656106 | FALSE |
| Rv1642  | 24  | 9   | 1,415037499  | 0,924898059  | 1,750424383  | 0,080045 | 0,11715748 | 0,02861741 | FALSE |
| Rv1643  | 47  | 50  | -0,089267338 | -0,579406778 | -1,991608667 | 0,046414 | 0,07208062 | 0,01760983 | FALSE |
| Rv1644  | 48  | 29  | 0,726981506  | 0,236842066  | 0,714194267  | 0,475107 | 0,55167799 | 0,13480585 | FALSE |
| Rv1646  | 87  | 67  | 0,376854305  | -0,113285135 | -0,488696564 | 0,625057 | 0,69898218 | 0,17080052 | FALSE |
| Rv1647  | 71  | 63  | 0,172467196  | -0,317672244 | -1,282602135 | 0,199632 | 0,26274385 | 0,06420305 | FALSE |
| Rv1648  | 31  | 13  | 1,253756592  | 0,763617152  | 1,689043203  | 0,091211 | 0,13133464 | 0,03208058 | FALSE |

|         |     |     |              |              |              |          |            |            |       |
|---------|-----|-----|--------------|--------------|--------------|----------|------------|------------|-------|
| Rv1650  | 23  | 20  | 0,201633861  | -0,288505579 | -0,659603883 | 0,509508 | 0,58535716 | 0,14303556 | FALSE |
| Rv1653  | 10  | 21  | -1,070389328 | -1,560528768 | -2,932665602 | 0,003361 | 0,00675244 | 0,00164957 | FALSE |
| Rv1655  | 16  | 2   | 3            | 2,50986056   | 2,946920872  | 0,00321  | 0,00647214 | 0,00157947 | FALSE |
| Rv1656  | 20  | 17  | 0,234465254  | -0,255674186 | -0,541994139 | 0,587823 | 0,66457644 | 0,16234195 | FALSE |
| Rv1657  | 1   | 6   | -2,584962501 | -3,075101941 | -2,375894006 | 0,017506 | 0,03034303 | 0,00741121 | FALSE |
| Rv1658  | 26  | 17  | 0,612976877  | 0,122837437  | 0,278051745  | 0,780973 | 0,82939846 | 0,20266853 | FALSE |
| Rv1660  | 46  | 13  | 1,823122238  | 1,332982798  | 3,254175128  | 0,001137 | 0,00247332 | 0,00060387 | FALSE |
| Rv1661  | 154 | 91  | 0,7589919    | 0,26885246   | 1,444255639  | 0,148667 | 0,20327204 | 0,04967075 | FALSE |
| Rv1666c | 17  | 4   | 2,087462841  | 1,597323401  | 2,264398215  | 0,02355  | 0,03928292 | 0,00958673 | FALSE |
| Rv1667c | 13  | 6   | 1,115477217  | 0,625337777  | 0,917426625  | 0,358919 | 0,434733   | 0,10616378 | FALSE |
| Rv1668c | 23  | 14  | 0,716207034  | 0,226067594  | 0,472759215  | 0,636385 | 0,70739634 | 0,17280738 | FALSE |
| Rv1671  | 3   | 5   | -0,736965594 | -1,227105034 | -1,192161297 | 0,233198 | 0,29881484 | 0,07298129 | FALSE |
| Rv1673c | 40  | 11  | 1,862496476  | 1,372357036  | 3,102912788  | 0,001916 | 0,00402528 | 0,0009836  | FALSE |
| Rv1675c | 20  | 3   | 2,736965594  | 2,246826154  | 3,087022158  | 0,002022 | 0,00422749 | 0,00103218 | FALSE |
| Rv1676  | 3   | 9   | -1,584962501 | -2,075101941 | -2,335132488 | 0,019537 | 0,03311199 | 0,00809112 | FALSE |
| Rv1680  | 5   | 7   | -0,485426827 | -0,975566267 | -1,171400233 | 0,241438 | 0,30826063 | 0,07531304 | FALSE |
| Rv1681  | 3   | 7   | -1,222392421 | -1,712531861 | -1,809773881 | 0,070331 | 0,10498548 | 0,02565384 | FALSE |
| Rv1682  | 26  | 18  | 0,530514717  | 0,040375277  | 0,092707869  | 0,926136 | 0,94156722 | 0,23007765 | FALSE |
| Rv1685c | 0   | 2   | NA           | NA           | NA           | NA       | NA         | NA         | FALSE |
| Rv1686c | 1   | 7   | -2,807354922 | -3,297494362 | -2,647819675 | 0,008101 | 0,01501446 | 0,00366887 | FALSE |
| Rv1687c | 7   | 5   | 0,485426827  | -0,004712613 | -0,005658617 | 0,995485 | 0,99612282 | 0,24331511 | FALSE |
| Rv1688  | 6   | 5   | 0,263034406  | -0,227105034 | -0,262384616 | 0,793025 | 0,83979996 | 0,20496008 | FALSE |
| Rv1689  | 34  | 46  | -0,436099115 | -0,926238555 | -2,875616102 | 0,004032 | 0,00799315 | 0,00195318 | FALSE |
| Rv1693  | 20  | 28  | -0,485426827 | -0,975566267 | -2,342849844 | 0,019137 | 0,03261196 | 0,00795239 | FALSE |
| Rv1694  | 29  | 26  | 0,157541277  | -0,332598163 | -0,86040973  | 0,389563 | 0,46521235 | 0,11367745 | FALSE |
| Rv1695  | 65  | 25  | 1,378511623  | 0,888372183  | 2,784566229  | 0,00536  | 0,01030047 | 0,00251694 | FALSE |
| Rv1698  | 17  | 5   | 1,765534746  | 1,275395306  | 1,911757353  | 0,055907 | 0,08559816 | 0,02090413 | FALSE |
| Rv1700  | 37  | 23  | 0,68589141   | 0,19575197   | 0,521953776  | 0,601703 | 0,67732728 | 0,16550902 | FALSE |
| Rv1702c | 0   | 2   | NA           | NA           | NA           | NA       | NA         | NA         | FALSE |
| Rv1703c | 55  | 27  | 1,026472211  | 0,536332771  | 1,643668722  | 0,100245 | 0,14302351 | 0,03494866 | FALSE |
| Rv1704c | 46  | 33  | 0,479167837  | -0,010971603 | -0,033809333 | 0,973029 | 0,9779125  | 0,23892809 | FALSE |
| Rv1706A | NA  | NA  | NA           | NA           | NA           | NA       | NA         | NA         | FALSE |
| Rv1707  | 236 | 134 | 0,816553859  | 0,326414419  | 2,149283645  | 0,031612 | 0,05126435 | 0,01252675 | FALSE |
| Rv1708  | 60  | 26  | 1,206450877  | 0,716311437  | 2,22244936   | 0,026253 | 0,04318356 | 0,01055217 | FALSE |
| Rv1709  | 13  | 5   | 1,378511623  | 0,888372183  | 1,245248184  | 0,213041 | 0,27795633 | 0,0678523  | FALSE |
| Rv1710  | 27  | 29  | -0,103093493 | -0,593232933 | -1,549203942 | 0,121333 | 0,16994412 | 0,04152687 | FALSE |
| Rv1711  | 47  | 33  | 0,510194732  | 0,020055292  | 0,062134202  | 0,950456 | 0,95979584 | 0,23453192 | FALSE |

|         |     |    |              |              |              |          |            |            |       |
|---------|-----|----|--------------|--------------|--------------|----------|------------|------------|-------|
| Rv1712  | 42  | 38 | 0,144389909  | -0,345749531 | -1,078869445 | 0,280646 | 0,35249996 | 0,0861355  | FALSE |
| Rv1713  | 37  | 18 | 1,039528364  | 0,549388924  | 1,377812864  | 0,168261 | 0,2263381  | 0,05530708 | FALSE |
| Rv1715  | 33  | 8  | 2,044394119  | 1,554254679  | 3,092858232  | 0,001982 | 0,00415302 | 0,00101427 | FALSE |
| Rv1716  | 61  | 70 | -0,198545679 | -0,688685119 | -2,748462646 | 0,005988 | 0,01137226 | 0,00277888 | FALSE |
| Rv1717  | 5   | 1  | 2,321928095  | 1,831788655  | 1,352220414  | 0,176305 | 0,23614142 | 0,0576334  | FALSE |
| Rv1720c | 5   | 8  | -0,678071905 | -1,168211345 | -1,4503344   | 0,146965 | 0,20136823 | 0,04918829 | FALSE |
| Rv1721c | 17  | 4  | 2,087462841  | 1,597323401  | 2,264398215  | 0,02355  | 0,03928292 | 0,00958673 | FALSE |
| Rv1723  | 10  | 2  | 2,321928095  | 1,831788655  | 1,912333526  | 0,055833 | 0,08570343 | 0,02090413 | FALSE |
| Rv1725c | 32  | 39 | -0,285402219 | -0,775541659 | -2,275649992 | 0,022867 | 0,03831603 | 0,00936075 | FALSE |
| Rv1727  | 0   | 1  | NA           | NA           | NA           | NA       | NA         | NA         | FALSE |
| Rv1728c | 18  | 15 | 0,263034406  | -0,227105034 | -0,454469398 | 0,649491 | 0,71848793 | 0,17556687 | FALSE |
| Rv1729c | 5   | 4  | 0,321928095  | -0,168211345 | -0,175607701 | 0,860602 | 0,88718358 | 0,2165029  | FALSE |
| Rv1730c | 15  | 17 | -0,180572246 | -0,670711686 | -1,323145556 | 0,185787 | 0,24668417 | 0,06027877 | FALSE |
| Rv1731  | 46  | 13 | 1,823122238  | 1,332982798  | 3,254175128  | 0,001137 | 0,00247332 | 0,00060387 | FALSE |
| Rv1732c | 4   | 8  | -1           | -1,49013944  | -1,749628282 | 0,080182 | 0,11720478 | 0,02862363 | FALSE |
| Rv1734c | 0   | 2  | NA           | NA           | NA           | NA       | NA         | NA         | FALSE |
| Rv1735c | 0   | 1  | NA           | NA           | NA           | NA       | NA         | NA         | FALSE |
| Rv1739c | 9   | 20 | -1,152003093 | -1,642142533 | -2,969370326 | 0,002984 | 0,00605505 | 0,0014792  | FALSE |
| Rv1740  | 34  | 9  | 1,91753784   | 1,4273984    | 2,947223371  | 0,003206 | 0,0064792  | 0,00157947 | FALSE |
| Rv1742  | 26  | 10 | 1,378511623  | 0,888372183  | 1,761063731  | 0,078228 | 0,11560221 | 0,02824276 | FALSE |
| Rv1743  | 118 | 56 | 1,075288127  | 0,585148687  | 2,604678582  | 0,009196 | 0,01676497 | 0,00409662 | FALSE |
| Rv1744c | 0   | 4  | NA           | NA           | NA           | NA       | NA         | NA         | FALSE |
| Rv1745c | 1   | 3  | -1,584962501 | -2,075101941 | -1,348183825 | 0,177599 | 0,23702158 | 0,05781885 | FALSE |
| Rv1746  | 17  | 10 | 0,765534746  | 0,275395306  | 0,49091235   | 0,623488 | 0,69752825 | 0,17042084 | FALSE |
| Rv1747  | 55  | 28 | 0,974004791  | 0,483865351  | 1,496419684  | 0,134544 | 0,18657514 | 0,04559076 | FALSE |
| Rv1748  | 38  | 32 | 0,247927513  | -0,242211927 | -0,706114892 | 0,480117 | 0,55526601 | 0,13566252 | FALSE |
| Rv1751  | 79  | 35 | 1,174497731  | 0,684358291  | 2,449982068  | 0,014286 | 0,02507332 | 0,00612682 | FALSE |
| Rv1752  | 5   | 5  | 0            | -0,49013944  | -0,54104788  | 0,588475 | 0,66483241 | 0,16234195 | FALSE |
| Rv1756c | 10  | 14 | -0,485426827 | -0,975566267 | -1,656621734 | 0,097596 | 0,13949937 | 0,03408752 | FALSE |
| Rv1757c | 13  | 15 | -0,206450877 | -0,696590318 | -1,285055122 | 0,198773 | 0,26192295 | 0,06394851 | FALSE |
| Rv1758  | 11  | 0  | 4,459431619  | 3,969292179  | 3,000774903  | 0,002693 | 0,0055086  | 0,00134535 | FALSE |
| Rv1759c | 21  | 4  | 2,392317423  | 1,902177983  | 2,842851455  | 0,004471 | 0,00876506 | 0,00214072 | FALSE |
| Rv1761c | 4   | 1  | 2            | 1,50986056   | 1,054098848  | 0,291838 | 0,3631117  | 0,08848889 | FALSE |
| Rv1762c | 12  | 4  | 1,584962501  | 1,094823061  | 1,42261141   | 0,154849 | 0,20995996 | 0,05126938 | FALSE |
| Rv1765A | 6   | 0  | 3,584962501  | 3,094823061  | 2,010691768  | 0,044358 | 0,06917655 | 0,01688348 | FALSE |
| Rv1765c | 137 | 82 | 0,740480078  | 0,250340638  | 1,272471596  | 0,203206 | 0,26686326 | 0,06519869 | FALSE |
| Rv1766  | 97  | 62 | 0,645716532  | 0,155577092  | 0,676402137  | 0,498785 | 0,57455954 | 0,1403971  | FALSE |



|         |      |     |              |              |              |          |            |            |       |
|---------|------|-----|--------------|--------------|--------------|----------|------------|------------|-------|
| Rv1768  | 101  | 63  | 0,680931559  | 0,190792119  | 0,841289606  | 0,400186 | 0,47484813 | 0,11603201 | FALSE |
| Rv1769  | 78   | 39  | 1            | 0,50986056   | 1,86938234   | 0,06157  | 0,09337066 | 0,02281568 | FALSE |
| Rv1771  | 38   | 43  | -0,178337241 | -0,668476681 | -2,098208257 | 0,035887 | 0,05738647 | 0,01402273 | FALSE |
| Rv1772  | 61   | 48  | 0,345774837  | -0,144364603 | -0,524275866 | 0,600087 | 0,67628816 | 0,1652551  | FALSE |
| Rv1778c | 4    | 12  | -1,584962501 | -2,075101941 | -2,696384287 | 0,00701  | 0,0132108  | 0,00322658 | FALSE |
| Rv1781c | 29   | 17  | 0,770518154  | 0,280378714  | 0,65222387   | 0,514257 | 0,58977171 | 0,14411428 | FALSE |
| Rv1783  | 971  | 773 | 0,329002881  | -0,161136559 | -2,343794288 | 0,019089 | 0,03256503 | 0,00795239 | FALSE |
| Rv1786  | 5    | 1   | 2,321928095  | 1,831788655  | 1,352220414  | 0,176305 | 0,23614142 | 0,0576334  | FALSE |
| Rv1787  | 17   | 19  | -0,160464672 | -0,650604112 | -1,361617649 | 0,173319 | 0,23258043 | 0,05683244 | FALSE |
| Rv1788  | 0    | 1   | NA           | NA           | NA           | NA       | NA         | NA         | FALSE |
| Rv1791  | 135  | 138 | -0,03170886  | -0,5218483   | -3,010206976 | 0,002611 | 0,00537132 | 0,00131252 | FALSE |
| Rv1801  | 479  | 271 | 0,821732804  | 0,331593364  | 3,108467909  | 0,001881 | 0,0039525  | 0,00096582 | FALSE |
| Rv1802  | 190  | 93  | 1,030696797  | 0,540557357  | 3,077144941  | 0,00209  | 0,00435962 | 0,0010653  | FALSE |
| Rv1803c | 77   | 41  | 0,909234536  | 0,419095096  | 1,550917412  | 0,120921 | 0,16948972 | 0,04141584 | FALSE |
| Rv1805c | 8    | 5   | 0,678071905  | 0,187932465  | 0,233318158  | 0,815514 | 0,85081047 | 0,20778966 | FALSE |
| Rv1807  | 1050 | 686 | 0,614108846  | 0,123969406  | 1,784676385  | 0,074314 | 0,11038246 | 0,02697262 | FALSE |
| Rv1809  | 774  | 475 | 0,704406053  | 0,214266613  | 2,606480869  | 0,009148 | 0,01668479 | 0,00407703 | FALSE |
| Rv1810  | 126  | 88  | 0,517848305  | 0,027708865  | 0,140383097  | 0,888357 | 0,91098616 | 0,22260498 | FALSE |
| Rv1812c | 31   | 37  | -0,255257055 | -0,745396495 | -2,14152987  | 0,032231 | 0,05214972 | 0,01274046 | FALSE |
| Rv1815  | 23   | 19  | 0,275634443  | -0,214504997 | -0,484169049 | 0,628266 | 0,70186764 | 0,17118513 | FALSE |
| Rv1819c | 11   | 3   | 1,874469118  | 1,384329678  | 1,637945495  | 0,101433 | 0,14445518 | 0,03525992 | FALSE |
| Rv1820  | 75   | 47  | 0,674229839  | 0,184090399  | 0,70029336   | 0,483744 | 0,55871659 | 0,13652578 | FALSE |
| Rv1821  | 204  | 161 | 0,341508464  | -0,148630976 | -0,987973493 | 0,323166 | 0,39584749 | 0,09672773 | FALSE |
| Rv1822  | 33   | 11  | 1,584962501  | 1,094823061  | 2,359168102  | 0,018316 | 0,03143904 | 0,00768232 | FALSE |
| Rv1823  | 34   | 23  | 0,563900885  | 0,073761445  | 0,192563511  | 0,847301 | 0,87857401 | 0,21468487 | FALSE |
| Rv1824  | 8    | 6   | 0,415037499  | -0,075101941 | -0,097587347 | 0,92226  | 0,93835987 | 0,22929391 | FALSE |
| Rv1825  | 18   | 26  | -0,530514717 | -1,020654157 | -2,343579539 | 0,0191   | 0,03256956 | 0,00795239 | FALSE |
| Rv1828  | 199  | 176 | 0,177193002  | -0,312946438 | -2,113909809 | 0,034523 | 0,05554685 | 0,01357321 | FALSE |
| Rv1830  | 103  | 55  | 0,905140814  | 0,415001374  | 1,777529434  | 0,075481 | 0,11181866 | 0,02732357 | FALSE |
| Rv1831  | 118  | 79  | 0,578862301  | 0,088722861  | 0,430418649  | 0,666891 | 0,73586038 | 0,17981171 | FALSE |
| Rv1833c | 9    | 11  | -0,289506617 | -0,779646057 | -1,21405926  | 0,224725 | 0,28933449 | 0,07065404 | FALSE |
| Rv1834  | 16   | 10  | 0,678071905  | 0,187932465  | 0,329964181  | 0,741427 | 0,79551382 | 0,19430853 | FALSE |
| Rv1836c | 36   | 19  | 0,921997488  | 0,431858048  | 1,090302479  | 0,27558  | 0,34680619 | 0,08471689 | FALSE |
| Rv1839c | 25   | 37  | -0,565597176 | -1,055736616 | -2,874320364 | 0,004049 | 0,00801788 | 0,00195922 | FALSE |
| Rv1840c | 7    | 1   | 2,807354922  | 2,317215482  | 1,860676038  | 0,06279  | 0,09498149 | 0,02317788 | FALSE |
| Rv1841c | 12   | 8   | 0,584962501  | 0,094823061  | 0,146526204  | 0,883506 | 0,90672561 | 0,22144749 | FALSE |
| Rv1844c | 90   | 50  | 0,847996907  | 0,357857467  | 1,447025813  | 0,14789  | 0,20227995 | 0,04942833 | FALSE |

|         |     |      |              |              |              |          |            |            |       |
|---------|-----|------|--------------|--------------|--------------|----------|------------|------------|-------|
| Rv1846c | 86  | 99   | -0,203091865 | -0,693231305 | -3,287665604 | 0,00101  | 0,00221375 | 0,00054094 | FALSE |
| Rv1851  | 4   | 2    | 1            | 0,50986056   | 0,423305433  | 0,672072 | 0,73990495 | 0,18064746 | FALSE |
| Rv1852  | 13  | 17   | -0,387023123 | -0,877162563 | -1,669607135 | 0,094997 | 0,13608355 | 0,03325284 | FALSE |
| Rv1853  | 7   | 14   | -1           | -1,49013944  | -2,314552321 | 0,020637 | 0,0348268  | 0,00851014 | FALSE |
| Rv1854c | 215 | 195  | 0,140862536  | -0,349276904 | -2,467869709 | 0,013592 | 0,02406014 | 0,00587924 | FALSE |
| Rv1856c | 16  | 22   | -0,459431619 | -0,949571059 | -2,030491988 | 0,042307 | 0,06640157 | 0,01622562 | FALSE |
| Rv1858  | 9   | 5    | 0,847996907  | 0,357857467  | 0,457556932  | 0,647271 | 0,71694581 | 0,1750659  | FALSE |
| Rv1859  | 63  | 32   | 0,977279923  | 0,487140483  | 1,611493212  | 0,107072 | 0,15154665 | 0,03703134 | FALSE |
| Rv1860  | 11  | 7    | 0,652076697  | 0,161937257  | 0,236811317  | 0,812803 | 0,84877561 | 0,20737573 | FALSE |
| Rv1861  | 20  | 26   | -0,378511623 | -0,868651063 | -2,047794729 | 0,04058  | 0,064182   | 0,01568326 | FALSE |
| Rv1862  | 78  | 44   | 0,8259706    | 0,33583116   | 1,269014232  | 0,204436 | 0,26798339 | 0,06548336 | FALSE |
| Rv1863c | 30  | 16   | 0,906890596  | 0,416751156  | 0,963001337  | 0,335547 | 0,4090885  | 0,09996325 | FALSE |
| Rv1864c | 26  | 6    | 2,115477217  | 1,625337777  | 2,835696123  | 0,004573 | 0,00892353 | 0,00217943 | FALSE |
| Rv1865c | 16  | 17   | -0,087462841 | -0,577602281 | -1,157998776 | 0,246865 | 0,31462337 | 0,07688012 | FALSE |
| Rv1866  | 24  | 5    | 2,263034406  | 1,772894966  | 2,896759478  | 0,00377  | 0,00751    | 0,00183465 | FALSE |
| Rv1867  | 7   | 3    | 1,222392421  | 0,732252981  | 0,773832213  | 0,43903  | 0,5153802  | 0,1258039  | FALSE |
| Rv1868  | 73  | 31   | 1,235628248  | 0,745488808  | 2,538430456  | 0,011135 | 0,02006578 | 0,00490319 | FALSE |
| Rv1869c | 198 | 108  | 0,874469118  | 0,384329678  | 2,294721871  | 0,021749 | 0,03663939 | 0,00895306 | FALSE |
| Rv1873  | 6   | 1    | 2,584962501  | 2,094823061  | 1,61850815   | 0,105553 | 0,14972211 | 0,03655894 | FALSE |
| Rv1875  | 328 | 231  | 0,505802963  | 0,015663523  | 0,128330942  | 0,897887 | 0,91979251 | 0,22475686 | FALSE |
| Rv1880c | 75  | 68   | 0,141355849  | -0,348783591 | -1,455170527 | 0,145622 | 0,1998082  | 0,04882434 | FALSE |
| Rv1881c | 10  | 1    | 3,321928095  | 2,831788655  | 2,485941687  | 0,012921 | 0,02302358 | 0,00561698 | FALSE |
| Rv1884c | 12  | 8    | 0,584962501  | 0,094823061  | 0,146526204  | 0,883506 | 0,90672561 | 0,22144749 | FALSE |
| Rv1885c | 10  | 8    | 0,321928095  | -0,168211345 | -0,248348112 | 0,803865 | 0,84760176 | 0,20685444 | FALSE |
| Rv1886c | 62  | 25   | 1,310340121  | 0,820200681  | 2,540690849  | 0,011063 | 0,01995495 | 0,00487611 | FALSE |
| Rv1888A | 3   | 0 NA | NA           | NA           | NA           | NA       | NA         | NA         | FALSE |
| Rv1888c | 48  | 27   | 0,830074999  | 0,339935559  | 1,006919801  | 0,313973 | 0,38616246 | 0,09436113 | FALSE |
| Rv1889c | 1   | 0 NA | NA           | NA           | NA           | NA       | NA         | NA         | FALSE |
| Rv1890c | 37  | 28   | 0,402098444  | -0,088040996 | -0,246586875 | 0,805228 | 0,84732288 | 0,20685444 | FALSE |
| Rv1892  | 22  | 5    | 2,137503524  | 1,647364084  | 2,633732374  | 0,008445 | 0,01556324 | 0,0037976  | FALSE |
| Rv1896c | 30  | 32   | -0,093109404 | -0,583248844 | -1,602751321 | 0,10899  | 0,15398128 | 0,03762626 | FALSE |
| Rv1897c | 12  | 6    | 1            | 0,50986056   | 0,733191443  | 0,463442 | 0,54086663 | 0,13216403 | FALSE |
| Rv1899c | 190 | 106  | 0,841935154  | 0,351795714  | 2,069221964  | 0,038525 | 0,06130446 | 0,01498012 | FALSE |
| Rv1901  | 51  | 62   | -0,281770968 | -0,771910408 | -2,857688149 | 0,004267 | 0,00839928 | 0,00205242 | FALSE |
| Rv1903  | 4   | 0 NA | NA           | NA           | NA           | NA       | NA         | NA         | FALSE |
| Rv1905c | 105 | 106  | -0,013674937 | -0,503814377 | -2,554919557 | 0,010621 | 0,01920181 | 0,00469208 | FALSE |
| Rv1907c | 65  | 52   | 0,321928095  | -0,168211345 | -0,633202925 | 0,526601 | 0,60286644 | 0,14731406 | FALSE |

|         |     |      |             |              |              |          |            |            |       |
|---------|-----|------|-------------|--------------|--------------|----------|------------|------------|-------|
| Rv1910c | 79  | 39   | 1,018378529 | 0,528239089  | 1,942945222  | 0,052023 | 0,0802643  | 0,01961307 | FALSE |
| Rv1913  | 10  | 3    | 1,736965594 | 1,246826154  | 1,440514091  | 0,149722 | 0,20428527 | 0,04986607 | FALSE |
| Rv1914c | 38  | 32   | 0,247927513 | -0,242211927 | -0,706114892 | 0,480117 | 0,55526601 | 0,13566252 | FALSE |
| Rv1916  | 84  | 51   | 0,719892081 | 0,229752641  | 0,917666977  | 0,358793 | 0,43498529 | 0,10616378 | FALSE |
| Rv1917c | 45  | 42   | 0,099535674 | -0,390603766 | -1,271460194 | 0,203565 | 0,26720042 | 0,06529204 | FALSE |
| Rv1918c | 38  | 27   | 0,493040011 | 0,002900571  | 0,008104297  | 0,993534 | 0,99506268 | 0,24314959 | FALSE |
| Rv1921c | 16  | 13   | 0,299560282 | -0,190579158 | -0,357295169 | 0,720871 | 0,78183604 | 0,19101984 | FALSE |
| Rv1922  | 51  | 21   | 1,280107919 | 0,789968479  | 2,231014933  | 0,02568  | 0,04229479 | 0,01033499 | FALSE |
| Rv1923  | 48  | 21   | 1,192645078 | 0,702505638  | 1,954158517  | 0,050682 | 0,0783822  | 0,01915317 | FALSE |
| Rv1924c | 13  | 6    | 1,115477217 | 0,625337777  | 0,917426625  | 0,358919 | 0,434733   | 0,10616378 | FALSE |
| Rv1925  | 441 | 353  | 0,321110472 | -0,169028968 | -1,658236634 | 0,09727  | 0,13908394 | 0,033986   | FALSE |
| Rv1926c | 95  | 67   | 0,503766418 | 0,013626978  | 0,060092292  | 0,952082 | 0,9610652  | 0,23481174 | FALSE |
| Rv1929c | 124 | 118  | 0,071553261 | -0,418586179 | -2,273011683 | 0,023025 | 0,03852377 | 0,00941352 | FALSE |
| Rv1930c | 1   | 1    | 0           | -0,49013944  | -0,241962819 | 0,808809 | 0,84800619 | 0,20685444 | FALSE |
| Rv1932  | 3   | 6    | -1          | -1,49013944  | -1,515219994 | 0,129717 | 0,18039306 | 0,04403309 | FALSE |
| Rv1940  | 29  | 19   | 0,610053482 | 0,119914042  | 0,286812791  | 0,774256 | 0,82248868 | 0,20098008 | FALSE |
| Rv1941  | 25  | 6    | 2,058893689 | 1,568754249  | 2,710269732  | 0,006723 | 0,01271935 | 0,00310805 | FALSE |
| Rv1942c | 27  | 12   | 1,169925001 | 0,679785561  | 1,423790007  | 0,154507 | 0,20975174 | 0,0512452  | FALSE |
| Rv1943c | 15  | 8    | 0,906890596 | 0,416751156  | 0,680935917  | 0,495912 | 0,5716713  | 0,13967072 | FALSE |
| Rv1944c | 5   | 4    | 0,321928095 | -0,168211345 | -0,175607701 | 0,860602 | 0,88718358 | 0,2165029  | FALSE |
| Rv1945  | 61  | 61   | 0           | -0,49013944  | -1,889924685 | 0,058768 | 0,08946946 | 0,0218624  | FALSE |
| Rv1946c | 5   | 0    | 3,321928095 | 2,831788655  | 1,757822924  | 0,078778 | 0,11610745 | 0,02833413 | FALSE |
| Rv1947  | 6   | 2    | 1,584962501 | 1,094823061  | 1,005934037  | 0,314447 | 0,38650196 | 0,09441437 | FALSE |
| Rv1948c | 4   | 2    | 1           | 0,50986056   | 0,423305433  | 0,672072 | 0,73990495 | 0,18064746 | FALSE |
| Rv1954c | 9   | 3    | 1,584962501 | 1,094823061  | 1,232015087  | 0,217943 | 0,28199774 | 0,06881664 | FALSE |
| Rv1963c | 106 | 49   | 1,11321061  | 0,62307117   | 2,611432367  | 0,009016 | 0,01649132 | 0,0040285  | FALSE |
| Rv1967  | 11  | 7    | 0,652076697 | 0,161937257  | 0,236811317  | 0,812803 | 0,84877561 | 0,20737573 | FALSE |
| Rv1969  | 3   | 1    | 1,584962501 | 1,094823061  | 0,711301316  | 0,476898 | 0,55277082 | 0,13487273 | FALSE |
| Rv1970  | 20  | 4    | 2,321928095 | 1,831788655  | 2,704462371  | 0,006842 | 0,0129313  | 0,00315984 | FALSE |
| Rv1972  | 5   | 1    | 2,321928095 | 1,831788655  | 1,352220414  | 0,176305 | 0,23614142 | 0,0576334  | FALSE |
| Rv1973  | 2   | 0 NA | NA          | NA           | NA           | NA       | NA         | NA         | FALSE |
| Rv1974  | 2   | 2    | 0           | -0,49013944  | -0,342187506 | 0,73221  | 0,79149598 | 0,19316621 | FALSE |
| Rv1975  | 1   | 0 NA | NA          | NA           | NA           | NA       | NA         | NA         | FALSE |
| Rv1977  | 69  | 30   | 1,201633861 | 0,711494421  | 2,369277986  | 0,017823 | 0,03082296 | 0,00753178 | FALSE |
| Rv1978  | 30  | 17   | 0,819427754 | 0,329288314  | 0,77251866   | 0,439807 | 0,51559517 | 0,1259888  | FALSE |
| Rv1980c | 162 | 154  | 0,073063462 | -0,417075978 | -2,588117872 | 0,00965  | 0,0175683  | 0,00429292 | FALSE |
| Rv1981c | 165 | 87   | 0,923378718 | 0,433239278  | 2,341363748  | 0,019213 | 0,03259273 | 0,00796423 | FALSE |



|         |     |     |              |              |              |          |            |            |       |
|---------|-----|-----|--------------|--------------|--------------|----------|------------|------------|-------|
| Rv2061c | 2   | 10  | -2,321928095 | -2,812067535 | -2,93571587  | 0,003328 | 0,00669501 | 0,00163597 | FALSE |
| Rv2063  | 0   | 5   | -3,321928095 | -3,812067535 | -2,366327617 | 0,017966 | 0,03101478 | 0,00756437 | FALSE |
| Rv2063A | 0   | 3   | NA           | NA           | NA           | NA       | NA         | NA         | FALSE |
| Rv2064  | 1   | 5   | -2,321928095 | -2,812067535 | -2,075859087 | 0,037907 | 0,06039444 | 0,01475775 | FALSE |
| Rv2065  | 6   | 5   | 0,263034406  | -0,227105034 | -0,262384616 | 0,793025 | 0,83979996 | 0,20496008 | FALSE |
| Rv2066  | 16  | 23  | -0,523561956 | -1,013701396 | -2,191847637 | 0,028391 | 0,04642586 | 0,01134444 | FALSE |
| Rv2067c | 15  | 15  | 0            | -0,49013944  | -0,937133546 | 0,34869  | 0,42352533 | 0,10349098 | FALSE |
| Rv2069  | 8   | 10  | -0,321928095 | -0,812067535 | -1,198940765 | 0,230551 | 0,29620055 | 0,07234269 | FALSE |
| Rv2070c | 14  | 8   | 0,807354922  | 0,317215482  | 0,509439725  | 0,610444 | 0,68519229 | 0,16733468 | FALSE |
| Rv2071c | 4   | 4   | 0            | -0,49013944  | -0,483927361 | 0,628437 | 0,70115661 | 0,17118513 | FALSE |
| Rv2072c | 19  | 27  | -0,506959989 | -0,997099429 | -2,342652968 | 0,019147 | 0,03260783 | 0,00795239 | FALSE |
| Rv2073c | 15  | 4   | 1,906890596  | 1,416751156  | 1,946542327  | 0,05159  | 0,07965896 | 0,01945745 | FALSE |
| Rv2074  | 9   | 3   | 1,584962501  | 1,094823061  | 1,232015087  | 0,217943 | 0,28199774 | 0,06881664 | FALSE |
| Rv2075c | 75  | 38  | 0,980891177  | 0,490751737  | 1,770227417  | 0,076689 | 0,1134362  | 0,02771882 | FALSE |
| Rv2077A | 1   | 0   | NA           | NA           | NA           | NA       | NA         | NA         | FALSE |
| Rv2081c | 27  | 25  | 0,111031312  | -0,379108128 | -0,953961629 | 0,340103 | 0,41438455 | 0,10125737 | FALSE |
| Rv2082  | 107 | 74  | 0,532013621  | 0,041874181  | 0,195017938  | 0,845379 | 0,87728    | 0,21436867 | FALSE |
| Rv2083  | 16  | 6   | 1,415037499  | 0,924898059  | 1,429207209  | 0,152945 | 0,2078834  | 0,05079757 | FALSE |
| Rv2085  | 20  | 6   | 1,736965594  | 1,246826154  | 2,037207815  | 0,041629 | 0,06558891 | 0,01601735 | FALSE |
| Rv2086  | 2   | 6   | -1,584962501 | -2,075101941 | -1,906623771 | 0,056569 | 0,08645918 | 0,02111856 | FALSE |
| Rv2088  | 26  | 34  | -0,387023123 | -0,877162563 | -2,361222739 | 0,018215 | 0,03131356 | 0,00764997 | FALSE |
| Rv2089c | 49  | 25  | 0,970853654  | 0,480714214  | 1,404001287  | 0,160318 | 0,21632468 | 0,05286024 | FALSE |
| Rv2090  | 2   | 4   | -1           | -1,49013944  | -1,237169867 | 0,216024 | 0,28100394 | 0,06859646 | FALSE |
| Rv2095c | 21  | 12  | 0,807354922  | 0,317215482  | 0,623937612  | 0,532669 | 0,60936596 | 0,14888045 | FALSE |
| Rv2096c | 16  | 8   | 1            | 0,50986056   | 0,846619397  | 0,397207 | 0,47239059 | 0,11537879 | FALSE |
| Rv2097c | 83  | 95  | -0,194816177 | -0,684955617 | -3,186670235 | 0,001439 | 0,0030711  | 0,00075044 | FALSE |
| Rv2100  | 1   | 2   | -1           | -1,49013944  | -0,874809733 | 0,381677 | 0,45754425 | 0,11164947 | FALSE |
| Rv2102  | 2   | 5   | -1,321928095 | -1,812067535 | -1,59075933  | 0,111664 | 0,15738926 | 0,03837283 | FALSE |
| Rv2104c | 106 | 73  | 0,538095896  | 0,047956456  | 0,222063969  | 0,824264 | 0,85833367 | 0,20973902 | FALSE |
| Rv2105  | 26  | 28  | -0,106915204 | -0,597054644 | -1,531049773 | 0,125757 | 0,17554296 | 0,04288732 | FALSE |
| Rv2107  | 8   | 1   | 3            | 2,50986056   | 2,083780734  | 0,03718  | 0,05934533 | 0,01449251 | FALSE |
| Rv2109c | 70  | 49  | 0,514573173  | 0,024433733  | 0,092314947  | 0,926448 | 0,94163944 | 0,23009529 | FALSE |
| Rv2112c | 82  | 35  | 1,228268988  | 0,738129548  | 2,667221993  | 0,007648 | 0,01427623 | 0,00348819 | FALSE |
| Rv2113  | 9   | 21  | -1,222392421 | -1,712531861 | -3,134654428 | 0,001721 | 0,00363474 | 0,00088793 | FALSE |
| Rv2114  | 50  | 32  | 0,64385619   | 0,15371675   | 0,479954742  | 0,63126  | 0,7032003  | 0,17180674 | FALSE |
| Rv2115c | 673 | 496 | 0,440266384  | -0,049873056 | -0,592197813 | 0,553718 | 0,62966491 | 0,15386243 | FALSE |
| Rv2116  | 8   | 5   | 0,678071905  | 0,187932465  | 0,233318158  | 0,815514 | 0,85081047 | 0,20778966 | FALSE |

|         |     |     |              |              |              |          |            |            |       |
|---------|-----|-----|--------------|--------------|--------------|----------|------------|------------|-------|
| Rv2117  | 2   | 0   | NA           | NA           | NA           | NA       | NA         | NA         | FALSE |
| Rv2118c | 13  | 8   | 0,700439718  | 0,210300278  | 0,331536929  | 0,740239 | 0,79522231 | 0,19421112 | FALSE |
| Rv2119  | 3   | 3   | 0            | -0,49013944  | -0,419092891 | 0,675148 | 0,74088911 | 0,18081208 | FALSE |
| Rv2120c | 4   | 10  | -1,321928095 | -1,812067535 | -2,249681867 | 0,024469 | 0,0406345  | 0,00992246 | FALSE |
| Rv2121c | 41  | 27  | 0,602664502  | 0,112525062  | 0,320428986  | 0,748643 | 0,80226441 | 0,19603816 | FALSE |
| Rv2122c | 12  | 4   | 1,584962501  | 1,094823061  | 1,42261141   | 0,154849 | 0,20995996 | 0,05126938 | FALSE |
| Rv2123  | 10  | 7   | 0,514573173  | 0,024433733  | 0,03488969   | 0,972168 | 0,97780164 | 0,23883947 | FALSE |
| Rv2125  | 18  | 16  | 0,169925001  | -0,320214439 | -0,651217786 | 0,514906 | 0,59025615 | 0,14421149 | FALSE |
| Rv2126c | 4   | 1   | 2            | 1,50986056   | 1,054098848  | 0,291838 | 0,3631117  | 0,08848889 | FALSE |
| Rv2127  | 107 | 54  | 0,986579484  | 0,496440044  | 2,136873747  | 0,032608 | 0,05268319 | 0,01287346 | FALSE |
| Rv2129c | 15  | 3   | 2,321928095  | 1,831788655  | 2,342126898  | 0,019174 | 0,03259697 | 0,00795239 | FALSE |
| Rv2132  | 8   | 7   | 0,192645078  | -0,297494362 | -0,401752025 | 0,687867 | 0,751467   | 0,18359983 | FALSE |
| Rv2135c | 9   | 10  | -0,152003093 | -0,642142533 | -0,976394728 | 0,328869 | 0,40226563 | 0,09828065 | FALSE |
| Rv2139  | 18  | 5   | 1,847996907  | 1,357857467  | 2,064658238  | 0,038955 | 0,06181253 | 0,015092   | FALSE |
| Rv2140c | 14  | 11  | 0,347923303  | -0,142216137 | -0,24732267  | 0,804659 | 0,84729446 | 0,20685444 | FALSE |
| Rv2141c | 42  | 54  | -0,362570079 | -0,852709519 | -2,905125539 | 0,003671 | 0,00733273 | 0,0017918  | FALSE |
| Rv2142A | 26  | 30  | -0,206450877 | -0,696590318 | -1,817372519 | 0,06916  | 0,10339593 | 0,02525575 | FALSE |
| Rv2143  | 45  | 52  | -0,208586622 | -0,698726062 | -2,39918824  | 0,016431 | 0,02856851 | 0,00698089 | FALSE |
| Rv2144c | 144 | 107 | 0,428458015  | -0,061681425 | -0,339299687 | 0,734384 | 0,79198272 | 0,19318673 | FALSE |
| Rv2147c | 14  | 5   | 1,485426827  | 0,995287387  | 1,421201948  | 0,155258 | 0,21011357 | 0,05129808 | FALSE |
| Rv2148c | 29  | 14  | 1,050626073  | 0,560486633  | 1,242040131  | 0,214222 | 0,27912444 | 0,06820575 | FALSE |
| Rv2149c | 50  | 15  | 1,736965594  | 1,246826154  | 3,221171235  | 0,001277 | 0,00274226 | 0,00067009 | FALSE |
| Rv2150c | 66  | 29  | 1,186413124  | 0,696273684  | 2,273612754  | 0,022989 | 0,0384797  | 0,00940275 | FALSE |
| Rv2151c | 18  | 20  | -0,152003093 | -0,642142533 | -1,380846223 | 0,167326 | 0,22515817 | 0,05501876 | FALSE |
| Rv2153c | 5   | 5   | 0            | -0,49013944  | -0,54104788  | 0,588475 | 0,66483241 | 0,16234195 | FALSE |
| Rv2154c | 36  | 25  | 0,526068812  | 0,035929372  | 0,097152547  | 0,922605 | 0,93846666 | 0,22932001 | FALSE |
| Rv2156c | 52  | 36  | 0,530514717  | 0,040375277  | 0,131112095  | 0,895687 | 0,91802003 | 0,22432375 | FALSE |
| Rv2157c | 46  | 13  | 1,823122238  | 1,332982798  | 3,254175128  | 0,001137 | 0,00247332 | 0,00060387 | FALSE |
| Rv2159c | 122 | 108 | 0,175849835  | -0,314289605 | -1,662507402 | 0,096411 | 0,13795723 | 0,03371068 | FALSE |
| Rv2160A | 208 | 142 | 0,550692599  | 0,060553159  | 0,391960082  | 0,695088 | 0,75755442 | 0,18511301 | FALSE |
| Rv2160c | NA  | NA  | NA           | NA           | NA           | NA       | NA         | NA         | FALSE |
| Rv2161c | 323 | 268 | 0,269301164  | -0,220838276 | -1,870634465 | 0,061396 | 0,09321557 | 0,02277779 | FALSE |
| Rv2162c | 168 | 92  | 0,868755467  | 0,378616027  | 2,084327047  | 0,03713  | 0,05932665 | 0,01449251 | FALSE |
| Rv2164c | 21  | 3   | 2,807354922  | 2,317215482  | 3,222805685  | 0,001269 | 0,00272966 | 0,00066664 | FALSE |
| Rv2166c | 93  | 57  | 0,706268797  | 0,216129357  | 0,910477531  | 0,362571 | 0,43827231 | 0,10707792 | FALSE |
| Rv2167c | 12  | 17  | -0,502500341 | -0,992639781 | -1,851974713 | 0,064029 | 0,09629695 | 0,02352621 | FALSE |
| Rv2168c | 9   | 17  | -0,91753784  | -1,40767728  | -2,444054054 | 0,014523 | 0,02547195 | 0,00622283 | FALSE |

|         |     |     |              |              |              |          |            |            |       |
|---------|-----|-----|--------------|--------------|--------------|----------|------------|------------|-------|
| Rv2169c | 460 | 274 | 0,747457968  | 0,257318528  | 2,394472167  | 0,016644 | 0,02892569 | 0,00706817 | FALSE |
| Rv2170  | 13  | 1   | 3,700439718  | 3,210300278  | 3,009274622  | 0,002619 | 0,00537933 | 0,00131309 | FALSE |
| Rv2171  | 7   | 0   | 3,807354922  | 3,317215482  | 2,239856154  | 0,0251   | 0,04146215 | 0,01011869 | FALSE |
| Rv2178c | 145 | 66  | 1,135514971  | 0,645375531  | 3,151515191  | 0,001624 | 0,00343593 | 0,00083959 | FALSE |
| Rv2179c | 9   | 3   | 1,584962501  | 1,094823061  | 1,232015087  | 0,217943 | 0,28199774 | 0,06881664 | FALSE |
| Rv2180c | 25  | 15  | 0,736965594  | 0,246826154  | 0,536213136  | 0,591811 | 0,66744345 | 0,1630703  | FALSE |
| Rv2181  | 94  | 81  | 0,214738849  | -0,275400591 | -1,270110658 | 0,204045 | 0,26765085 | 0,06539843 | FALSE |
| Rv2183c | 20  | 15  | 0,415037499  | -0,075101941 | -0,154301048 | 0,877372 | 0,9017342  | 0,22031521 | FALSE |
| Rv2184c | 171 | 109 | 0,64966819   | 0,15952875   | 0,920329839  | 0,3574   | 0,43343126 | 0,10591155 | FALSE |
| Rv2186c | 19  | 7   | 1,440572591  | 0,950433151  | 1,593378317  | 0,111075 | 0,15670131 | 0,03829091 | FALSE |
| Rv2187  | 74  | 88  | -0,249978253 | -0,740117693 | -3,282460238 | 0,001029 | 0,0022525  | 0,00055041 | FALSE |
| Rv2189c | 14  | 4   | 1,807354922  | 1,317215482  | 1,778837029  | 0,075266 | 0,11164886 | 0,02726654 | FALSE |
| Rv2190c | 45  | 19  | 1,243925583  | 0,753786143  | 2,012255982  | 0,044193 | 0,06905703 | 0,0168745  | FALSE |
| Rv2191  | 3   | 3   | 0            | -0,49013944  | -0,419092891 | 0,675148 | 0,74088911 | 0,18081208 | FALSE |
| Rv2192c | 19  | 4   | 2,247927513  | 1,757788073  | 2,562140115  | 0,010403 | 0,01885079 | 0,00460631 | FALSE |
| Rv2194  | 37  | 13  | 1,509013647  | 1,018874207  | 2,355573267  | 0,018494 | 0,03161981 | 0,00772649 | FALSE |
| Rv2199c | 24  | 4   | 2,584962501  | 2,094823061  | 3,237044548  | 0,001208 | 0,00260782 | 0,00063657 | FALSE |
| Rv2200c | 126 | 98  | 0,362570079  | -0,127569361 | -0,663943797 | 0,506726 | 0,58250401 | 0,14233838 | FALSE |
| Rv2201  | 24  | 11  | 1,125530882  | 0,635391442  | 1,264384581  | 0,206092 | 0,27006354 | 0,06599166 | FALSE |
| Rv2205c | 31  | 15  | 1,047305715  | 0,557166275  | 1,27728452   | 0,201502 | 0,26502681 | 0,0647609  | FALSE |
| Rv2207  | 15  | 7   | 1,099535674  | 0,609396234  | 0,963010104  | 0,335542 | 0,40946665 | 0,09996325 | FALSE |
| Rv2208  | 9   | 21  | -1,222392421 | -1,712531861 | -3,134654428 | 0,001721 | 0,00363474 | 0,00088793 | FALSE |
| Rv2209  | 291 | 182 | 0,677080703  | 0,186941263  | 1,400372106  | 0,161402 | 0,2177114  | 0,0531991  | FALSE |
| Rv2211c | 26  | 16  | 0,700439718  | 0,210300278  | 0,468869699  | 0,639163 | 0,70987788 | 0,17346295 | FALSE |
| Rv2213  | 31  | 12  | 1,36923381   | 0,87909437   | 1,905941863  | 0,056658 | 0,0865266  | 0,0211433  | FALSE |
| Rv2214c | 62  | 26  | 1,253756592  | 0,763617152  | 2,388724753  | 0,016907 | 0,02935602 | 0,00717332 | FALSE |
| Rv2215  | 164 | 142 | 0,207804885  | -0,282334555 | -1,722083741 | 0,085054 | 0,12347109 | 0,03017091 | FALSE |
| Rv2217  | 39  | 37  | 0,075948853  | -0,414190587 | -1,260273683 | 0,207571 | 0,27190989 | 0,06644283 | FALSE |
| Rv2219A | 56  | 68  | -0,280107919 | -0,770247359 | -2,98720308  | 0,002815 | 0,00573812 | 0,00140214 | FALSE |
| Rv2222c | 157 | 78  | 1,00921853   | 0,51907909   | 2,695986075  | 0,007018 | 0,01321385 | 0,003228   | FALSE |
| Rv2223c | 37  | 9   | 2,039528364  | 1,549388924  | 3,267453271  | 0,001085 | 0,00236809 | 0,0005785  | FALSE |
| Rv2224c | 252 | 129 | 0,966052668  | 0,475913228  | 3,15534471   | 0,001603 | 0,00339482 | 0,00082955 | FALSE |
| Rv2225  | 57  | 38  | 0,584962501  | 0,094823061  | 0,319360393  | 0,749453 | 0,80291218 | 0,19619645 | FALSE |
| Rv2226  | 72  | 49  | 0,555215157  | 0,065075717  | 0,247605456  | 0,80444  | 0,84763545 | 0,20685444 | FALSE |
| Rv2227  | 9   | 2   | 2,169925001  | 1,679785561  | 1,708058052  | 0,087626 | 0,12673254 | 0,03093349 | FALSE |
| Rv2228c | 34  | 10  | 1,765534746  | 1,275395306  | 2,703662777  | 0,006858 | 0,01294992 | 0,00316286 | FALSE |
| Rv2229c | 25  | 16  | 0,64385619   | 0,15371675   | 0,339371192  | 0,73433  | 0,79236228 | 0,19318673 | FALSE |

|         |     |     |              |              |              |          |            |            |       |
|---------|-----|-----|--------------|--------------|--------------|----------|------------|------------|-------|
| Rv2231A | 6   | 1   | 2,584962501  | 2,094823061  | 1,61850815   | 0,105553 | 0,14972211 | 0,03655894 | FALSE |
| Rv2231B | 3   | 0   | NA           | NA           | NA           | NA       | NA         | NA         | FALSE |
| Rv2231c | 9   | 2   | 2,169925001  | 1,679785561  | 1,708058052  | 0,087626 | 0,12673254 | 0,03093349 | FALSE |
| Rv2232  | 15  | 11  | 0,447458977  | -0,042680463 | -0,075515343 | 0,939805 | 0,953602   | 0,23292763 | FALSE |
| Rv2234  | 18  | 4   | 2,169925001  | 1,679785561  | 2,415571032  | 0,015711 | 0,02738216 | 0,00668354 | FALSE |
| Rv2236c | 9   | 3   | 1,584962501  | 1,094823061  | 1,232015087  | 0,217943 | 0,28199774 | 0,06881664 | FALSE |
| Rv2237  | 18  | 6   | 1,584962501  | 1,094823061  | 1,742343196  | 0,081448 | 0,11881062 | 0,02902125 | FALSE |
| Rv2237A | 106 | 85  | 0,318529518  | -0,171609922 | -0,825469474 | 0,409105 | 0,48352162 | 0,11815143 | FALSE |
| Rv2238c | 25  | 11  | 1,184424571  | 0,694285131  | 1,395751358  | 0,162789 | 0,2193556  | 0,05360087 | FALSE |
| Rv2240c | 1   | 3   | -1,584962501 | -2,075101941 | -1,348183825 | 0,177599 | 0,23702158 | 0,05781885 | FALSE |
| Rv2241  | 149 | 114 | 0,386278506  | -0,103860934 | -0,585424233 | 0,558262 | 0,63464776 | 0,15508002 | FALSE |
| Rv2242  | 78  | 60  | 0,378511623  | -0,111627817 | -0,455824481 | 0,648516 | 0,71761285 | 0,17535304 | FALSE |
| Rv2243  | 100 | 49  | 1,029146346  | 0,539006906  | 2,226424238  | 0,025986 | 0,0427621  | 0,01044918 | FALSE |
| Rv2245  | 346 | 206 | 0,7481277    | 0,25798826   | 2,081622484  | 0,037377 | 0,05957431 | 0,01455734 | FALSE |
| Rv2246  | 144 | 120 | 0,263034406  | -0,227105034 | -1,285609189 | 0,198579 | 0,26206587 | 0,06394851 | FALSE |
| Rv2248  | 44  | 46  | -0,064130337 | -0,554269777 | -1,835377896 | 0,06645  | 0,09984076 | 0,02439669 | FALSE |
| Rv2249c | 23  | 10  | 1,201633861  | 0,711494421  | 1,367854011  | 0,171358 | 0,23030532 | 0,05626682 | FALSE |
| Rv2250A | 11  | 2   | 2,459431619  | 1,969292179  | 2,105458637  | 0,035251 | 0,05649774 | 0,01379707 | FALSE |
| Rv2250c | 18  | 29  | -0,688055994 | -1,178195434 | -2,780194711 | 0,005433 | 0,0104299  | 0,00254861 | FALSE |
| Rv2251  | 14  | 12  | 0,222392421  | -0,267747019 | -0,475868675 | 0,634168 | 0,70573548 | 0,1724016  | FALSE |
| Rv2252  | 20  | 10  | 1            | 0,50986056   | 0,946552441  | 0,343867 | 0,41792723 | 0,10212305 | FALSE |
| Rv2254c | 74  | 51  | 0,537028024  | 0,046888584  | 0,181437787  | 0,856024 | 0,88644221 | 0,2165029  | FALSE |
| Rv2255c | 21  | 20  | 0,070389328  | -0,419750112 | -0,938084978 | 0,348201 | 0,42306282 | 0,10337796 | FALSE |
| Rv2257c | 11  | 4   | 1,459431619  | 0,969292179  | 1,232394544  | 0,217802 | 0,28246954 | 0,06881664 | FALSE |
| Rv2259  | 14  | 17  | -0,280107919 | -0,770247359 | -1,493519448 | 0,135301 | 0,18749164 | 0,04581472 | FALSE |
| Rv2261c | 4   | 2   | 1            | 0,50986056   | 0,423305433  | 0,672072 | 0,73990495 | 0,18064746 | FALSE |
| Rv2262c | 14  | 27  | -0,94753258  | -1,43767202  | -3,129473413 | 0,001751 | 0,00369445 | 0,00090276 | FALSE |
| Rv2265  | 10  | 3   | 1,736965594  | 1,246826154  | 1,440514091  | 0,149722 | 0,20428527 | 0,04986607 | FALSE |
| Rv2266  | 157 | 138 | 0,186096292  | -0,304043148 | -1,821311784 | 0,068559 | 0,10261585 | 0,0250748  | FALSE |
| Rv2267c | 2   | 2   | 0            | -0,49013944  | -0,342187506 | 0,73221  | 0,79149598 | 0,19316621 | FALSE |
| Rv2268c | 3   | 1   | 1,584962501  | 1,094823061  | 0,711301316  | 0,476898 | 0,55277082 | 0,13487273 | FALSE |
| Rv2269c | NA  | NA  | NA           | NA           | NA           | NA       | NA         | NA         | FALSE |
| Rv2270  | 17  | 4   | 2,087462841  | 1,597323401  | 2,264398215  | 0,02355  | 0,03928292 | 0,00958673 | FALSE |
| Rv2271  | 0   | 1   | NA           | NA           | NA           | NA       | NA         | NA         | FALSE |
| Rv2272  | 23  | 7   | 1,716207034  | 1,226067594  | 2,15603544   | 0,031081 | 0,05046607 | 0,01232656 | FALSE |
| Rv2274A | 3   | 0   | NA           | NA           | NA           | NA       | NA         | NA         | FALSE |
| Rv2274c | 7   | 8   | -0,192645078 | -0,682784518 | -0,922068105 | 0,356493 | 0,43259956 | 0,10567548 | FALSE |



|         |     |     |    |              |              |              |          |            |            |       |
|---------|-----|-----|----|--------------|--------------|--------------|----------|------------|------------|-------|
| Rv2275  |     | 14  | 6  | 1,222392421  | 0,732252981  | 1,094369965  | 0,273793 | 0,34539192 | 0,08427609 | FALSE |
| Rv2276  |     | 5   | 1  | 2,321928095  | 1,831788655  | 1,352220414  | 0,176305 | 0,23614142 | 0,0576334  | FALSE |
| Rv2277c | NA  | NA  | NA | NA           | NA           | NA           | NA       | NA         | NA         | FALSE |
| Rv2278  |     | 41  | 40 | 0,03562391   | -0,45451553  | -1,42793699  | 0,15331  | 0,20830742 | 0,05090118 | FALSE |
| Rv2280  |     | 86  | 33 | 1,381870635  | 0,891731195  | 3,213238795  | 0,001312 | 0,00280987 | 0,00068661 | FALSE |
| Rv2281  |     | 40  | 49 | -0,292781749 | -0,782921189 | -2,571777348 | 0,010118 | 0,01839385 | 0,00449465 | FALSE |
| Rv2282c |     | 16  | 25 | -0,64385619  | -1,13399563  | -2,503601263 | 0,012294 | 0,02203659 | 0,00538354 | FALSE |
| Rv2283  |     | 1   | 0  | NA           | NA           | NA           | NA       | NA         | NA         | FALSE |
| Rv2284  |     | 38  | 49 | -0,366782331 | -0,856921771 | -2,778988946 | 0,005453 | 0,01044559 | 0,00255182 | FALSE |
| Rv2287  |     | 11  | 21 | -0,932885804 | -1,423025244 | -2,738746948 | 0,006167 | 0,01170244 | 0,00285817 | FALSE |
| Rv2288  |     | 27  | 9  | 1,584962501  | 1,094823061  | 2,133939061  | 0,032848 | 0,05300436 | 0,01294659 | FALSE |
| Rv2290  |     | 27  | 31 | -0,199308808 | -0,689448248 | -1,830738971 | 0,06714  | 0,10079962 | 0,024631   | FALSE |
| Rv2291  | 148 | 153 |    | -0,047934477 | -0,538073917 | -3,259014661 | 0,001118 | 0,00243762 | 0,00059565 | FALSE |
| Rv2292c |     | 1   | 1  | 0            | -0,49013944  | -0,241962819 | 0,808809 | 0,84800619 | 0,20685444 | FALSE |
| Rv2294  |     | 12  | 5  | 1,263034406  | 0,772894966  | 1,061917443  | 0,288273 | 0,36091911 | 0,08810802 | FALSE |
| Rv2300c |     | 7   | 3  | 1,222392421  | 0,732252981  | 0,773832213  | 0,43903  | 0,5153802  | 0,1258039  | FALSE |
| Rv2302  |     | 49  | 27 | 0,859822342  | 0,369682902  | 1,100693884  | 0,27103  | 0,34268149 | 0,08372274 | FALSE |
| Rv2303c |     | 24  | 14 | 0,777607579  | 0,287468139  | 0,607592576  | 0,543458 | 0,61962114 | 0,15140817 | FALSE |
| Rv2304c |     | 29  | 34 | -0,229481846 | -0,719621286 | -1,990755357 | 0,046508 | 0,07215452 | 0,01762439 | FALSE |
| Rv2306A |     | 8   | 3  | 1,415037499  | 0,924898059  | 1,01059623   | 0,31221  | 0,38484184 | 0,09391985 | FALSE |
| Rv2306B |     | 3   | 1  | 1,584962501  | 1,094823061  | 0,711301316  | 0,476898 | 0,55277082 | 0,13487273 | FALSE |
| Rv2307c |     | 31  | 10 | 1,632268215  | 1,142128775  | 2,365881815  | 0,017987 | 0,03098366 | 0,00756437 | FALSE |
| Rv2308  |     | 16  | 20 | -0,321928095 | -0,812067535 | -1,6955763   | 0,089966 | 0,12970936 | 0,03168942 | FALSE |
| Rv2309A |     | 2   | 0  | NA           | NA           | NA           | NA       | NA         | NA         | FALSE |
| Rv2309c |     | 17  | 3  | 2,502500341  | 2,0123609    | 2,654792404  | 0,007936 | 0,01474613 | 0,00359903 | FALSE |
| Rv2310  | NA  | NA  | NA | NA           | NA           | NA           | NA       | NA         | NA         | FALSE |
| Rv2311  | NA  | NA  | NA | NA           | NA           | NA           | NA       | NA         | NA         | FALSE |
| Rv2312  |     | 12  | 5  | 1,263034406  | 0,772894966  | 1,061917443  | 0,288273 | 0,36091911 | 0,08810802 | FALSE |
| Rv2313c |     | 37  | 25 | 0,565597176  | 0,075457736  | 0,20543922   | 0,837229 | 0,86974705 | 0,21252795 | FALSE |
| Rv2315c |     | 24  | 17 | 0,497499659  | 0,007360219  | 0,01633032   | 0,986971 | 0,99039477 | 0,24197786 | FALSE |
| Rv2316  |     | 10  | 1  | 3,321928095  | 2,831788655  | 2,485941687  | 0,012921 | 0,02302358 | 0,00561698 | FALSE |
| Rv2317  |     | 8   | 2  | 2            | 1,50986056   | 1,490724428  | 0,136034 | 0,18800645 | 0,04583507 | FALSE |
| Rv2319c |     | 12  | 1  | 3,584962501  | 3,094823061  | 2,843553417  | 0,004461 | 0,00875897 | 0,00213923 | FALSE |
| Rv2320c |     | 11  | 3  | 1,874469118  | 1,384329678  | 1,637945495  | 0,101433 | 0,14445518 | 0,03525992 | FALSE |
| Rv2321c |     | 8   | 19 | -1,247927513 | -1,738066953 | -3,012743973 | 0,002589 | 0,00533365 | 0,00130297 | FALSE |
| Rv2323c |     | 9   | 11 | -0,289506617 | -0,779646057 | -1,21405926  | 0,224725 | 0,28933449 | 0,07065404 | FALSE |
| Rv2324  |     | 10  | 2  | 2,321928095  | 1,831788655  | 1,912333526  | 0,055833 | 0,08570343 | 0,02090413 | FALSE |

|         |     |      |              |              |              |          |            |            |       |
|---------|-----|------|--------------|--------------|--------------|----------|------------|------------|-------|
| Rv2325c | 16  | 15   | 0,093109404  | -0,397030036 | -0,771458612 | 0,440435 | 0,5160988  | 0,12609294 | FALSE |
| Rv2326c | 161 | 134  | 0,264827688  | -0,225311752 | -1,348250981 | 0,177578 | 0,23747973 | 0,05781885 | FALSE |
| Rv2327  | 29  | 7    | 2,050626073  | 1,560486633  | 2,9078358    | 0,003639 | 0,00728065 | 0,00177725 | FALSE |
| Rv2328  | 25  | 17   | 0,556393349  | 0,066253908  | 0,148507312  | 0,881942 | 0,90595426 | 0,22134629 | FALSE |
| Rv2335  | 29  | 8    | 1,857980995  | 1,367841555  | 2,635385267  | 0,008404 | 0,01552061 | 0,00379166 | FALSE |
| Rv2337c | 48  | 22   | 1,125530882  | 0,635391442  | 1,788144326  | 0,073753 | 0,10971596 | 0,02680976 | FALSE |
| Rv2339  | 83  | 91   | -0,132755209 | -0,622894649 | -2,866934458 | 0,004145 | 0,00817838 | 0,00199844 | FALSE |
| Rv2340c | 53  | 33   | 0,683526335  | 0,193386895  | 0,617411239  | 0,536964 | 0,61382977 | 0,14999302 | FALSE |
| Rv2341  | 7   | 0    | 3,807354922  | 3,317215482  | 2,239856154  | 0,0251   | 0,04146215 | 0,01011869 | FALSE |
| Rv2342  | 17  | 4    | 2,087462841  | 1,597323401  | 2,264398215  | 0,02355  | 0,03928292 | 0,00958673 | FALSE |
| Rv2343c | 39  | 48   | -0,299560282 | -0,789699722 | -2,564420438 | 0,010335 | 0,0187622  | 0,0045799  | FALSE |
| Rv2345  | 85  | 50   | 0,765534746  | 0,275395306  | 1,097781376  | 0,2723   | 0,34412018 | 0,08408785 | FALSE |
| Rv2346c | 47  | 53   | -0,173331603 | -0,663471043 | -2,314033354 | 0,020666 | 0,03485975 | 0,00851819 | FALSE |
| Rv2347c | 34  | 13   | 1,387023123  | 0,896883683  | 2,030163436  | 0,04234  | 0,06642725 | 0,0162319  | FALSE |
| Rv2349c | 10  | 5    | 1            | 0,50986056   | 0,66930803   | 0,503299 | 0,57899031 | 0,14141729 | FALSE |
| Rv2350c | 7   | 5    | 0,485426827  | -0,004712613 | -0,005658617 | 0,995485 | 0,99612282 | 0,24331511 | FALSE |
| Rv2351c | 28  | 14   | 1            | 0,50986056   | 1,119983475  | 0,262721 | 0,33298434 | 0,08136674 | FALSE |
| Rv2357c | 65  | 31   | 1,068171503  | 0,578032063  | 1,911931424  | 0,055885 | 0,08564792 | 0,02090413 | FALSE |
| Rv2358  | 103 | 42   | 1,294183104  | 0,804043664  | 3,219316343  | 0,001285 | 0,00275855 | 0,00067407 | FALSE |
| Rv2359  | 21  | 10   | 1,070389328  | 0,580249888  | 1,090450187  | 0,275515 | 0,34694796 | 0,08471689 | FALSE |
| Rv2365c | 0   | 1 NA | NA           | NA           | NA           | NA       | NA         | NA         | FALSE |
| Rv2369c | 70  | 56   | 0,321928095  | -0,168211345 | -0,65710922  | 0,511111 | 0,58685306 | 0,14340109 | FALSE |
| Rv2370c | 39  | 21   | 0,893084796  | 0,402945356  | 1,0641684    | 0,287252 | 0,36021859 | 0,08802159 | FALSE |
| Rv2371  | 5   | 2    | 1,321928095  | 0,831788655  | 0,730202124  | 0,465267 | 0,54186288 | 0,13217096 | FALSE |
| Rv2375  | 4   | 2    | 1            | 0,50986056   | 0,423305433  | 0,672072 | 0,73990495 | 0,18064746 | FALSE |
| Rv2377c | NA  | NA   | NA           | NA           | NA           | NA       | NA         | NA         | FALSE |
| Rv2378c | 9   | 0    | 4,169925001  | 3,679785561  | 2,645788974  | 0,00815  | 0,01509414 | 0,00368747 | FALSE |
| Rv2379c | 29  | 8    | 1,857980995  | 1,367841555  | 2,635385267  | 0,008404 | 0,01552061 | 0,00379166 | FALSE |
| Rv2381c | 5   | 11   | -1,137503524 | -1,627642964 | -2,188175297 | 0,028657 | 0,04680257 | 0,01143171 | FALSE |
| Rv2382c | 20  | 11   | 0,862496476  | 0,372357036  | 0,70794799   | 0,478978 | 0,55419477 | 0,13542084 | FALSE |
| Rv2384  | 9   | 7    | 0,362570079  | -0,127569361 | -0,1774247   | 0,859175 | 0,88805654 | 0,2165029  | FALSE |
| Rv2386c | 85  | 35   | 1,280107919  | 0,789968479  | 2,880302523  | 0,003973 | 0,00789131 | 0,00192829 | FALSE |
| Rv2387  | 34  | 18   | 0,91753784   | 0,4273984    | 1,049450538  | 0,293971 | 0,36466201 | 0,08902305 | FALSE |
| Rv2388c | 64  | 22   | 1,540568381  | 1,050428941  | 3,176619252  | 0,00149  | 0,00316914 | 0,0007744  | FALSE |
| Rv2393  | 22  | 35   | -0,669851398 | -1,159990838 | -3,016615931 | 0,002556 | 0,00527574 | 0,00128916 | FALSE |
| Rv2394  | 56  | 42   | 0,415037499  | -0,075101941 | -0,258204597 | 0,796249 | 0,84173048 | 0,20568193 | FALSE |
| Rv2397c | 37  | 36   | 0,039528364  | -0,450611076 | -1,343925548 | 0,178972 | 0,23820296 | 0,05820633 | FALSE |

|         |     |     |              |              |              |          |            |            |       |
|---------|-----|-----|--------------|--------------|--------------|----------|------------|------------|-------|
| Rv2401  | 0   | 5   | -3,321928095 | -3,812067535 | -2,366327617 | 0,017966 | 0,03101478 | 0,00756437 | FALSE |
| Rv2401A | 4   | 0   | NA           | NA           | NA           | NA       | NA         | NA         | FALSE |
| Rv2402  | 72  | 31  | 1,215728691  | 0,725589251  | 2,462165392  | 0,01381  | 0,02437994 | 0,0059553  | FALSE |
| Rv2404c | 91  | 55  | 0,726434927  | 0,236295487  | 0,981231324  | 0,326479 | 0,39965494 | 0,0976581  | FALSE |
| Rv2407  | 9   | 3   | 1,584962501  | 1,094823061  | 1,232015087  | 0,217943 | 0,28199774 | 0,06881664 | FALSE |
| Rv2408  | 1   | 1   | 0            | -0,49013944  | -0,241962819 | 0,808809 | 0,84800619 | 0,20685444 | FALSE |
| Rv2412  | 17  | 20  | -0,234465254 | -0,724604694 | -1,536062371 | 0,124523 | 0,17403817 | 0,04252728 | FALSE |
| Rv2414c | 36  | 49  | -0,444784843 | -0,934924283 | -2,991239692 | 0,002778 | 0,00566872 | 0,00138519 | FALSE |
| Rv2415c | 14  | 6   | 1,222392421  | 0,732252981  | 1,094369965  | 0,273793 | 0,34539192 | 0,08427609 | FALSE |
| Rv2417c | 15  | 13  | 0,206450877  | -0,283688563 | -0,523342675 | 0,600736 | 0,67672677 | 0,16532601 | FALSE |
| Rv2418c | 21  | 27  | -0,362570079 | -0,852709519 | -2,054175879 | 0,039959 | 0,06332736 | 0,01547442 | FALSE |
| Rv2419c | 19  | 14  | 0,440572591  | -0,049566849 | -0,098820853 | 0,921281 | 0,93785203 | 0,22911009 | FALSE |
| Rv2422  | NA  | NA  | NA           | NA           | NA           | NA       | NA         | NA         | FALSE |
| Rv2423  | 6   | 5   | 0,263034406  | -0,227105034 | -0,262384616 | 0,793025 | 0,83979996 | 0,20496008 | FALSE |
| Rv2424c | 18  | 9   | 1            | 0,50986056   | 0,897976983  | 0,369198 | 0,44504321 | 0,10873222 | FALSE |
| Rv2425c | 49  | 52  | -0,085729874 | -0,575869314 | -2,019892682 | 0,043395 | 0,06790447 | 0,01658954 | FALSE |
| Rv2426c | 25  | 16  | 0,64385619   | 0,15371675   | 0,339371192  | 0,73433  | 0,79236228 | 0,19318673 | FALSE |
| Rv2427c | 83  | 64  | 0,375039431  | -0,115100009 | -0,485127543 | 0,627586 | 0,70140894 | 0,17118513 | FALSE |
| Rv2432c | 9   | 20  | -1,152003093 | -1,642142533 | -2,969370326 | 0,002984 | 0,00605505 | 0,0014792  | FALSE |
| Rv2433c | 0   | 7   | -3,807354922 | -4,297494362 | -2,901761807 | 0,003711 | 0,00740813 | 0,00181022 | FALSE |
| Rv2435c | 23  | 25  | -0,120294234 | -0,610433674 | -1,475693892 | 0,140026 | 0,19280743 | 0,04711366 | FALSE |
| Rv2436  | 13  | 12  | 0,115477217  | -0,374662223 | -0,653666104 | 0,513327 | 0,58905134 | 0,14389597 | FALSE |
| Rv2438A | 1   | 0   | NA           | NA           | NA           | NA       | NA         | NA         | FALSE |
| Rv2439c | 20  | 34  | -0,765534746 | -1,255674186 | -3,165527654 | 0,001548 | 0,00328712 | 0,00080323 | FALSE |
| Rv2442c | 276 | 178 | 0,632791026  | 0,142651586  | 1,048700999  | 0,294316 | 0,36462659 | 0,08909871 | FALSE |
| Rv2446c | 4   | 4   | 0            | -0,49013944  | -0,483927361 | 0,628437 | 0,70115661 | 0,17118513 | FALSE |
| Rv2450c | 13  | 9   | 0,530514717  | 0,040375277  | 0,065553521  | 0,947733 | 0,95754166 | 0,23392057 | FALSE |
| Rv2451  | 2   | 4   | -1           | -1,49013944  | -1,237169867 | 0,216024 | 0,28100394 | 0,06859646 | FALSE |
| Rv2454c | 218 | 113 | 0,948005362  | 0,457865922  | 2,832249328  | 0,004622 | 0,00901129 | 0,00220196 | FALSE |
| Rv2455c | 725 | 466 | 0,63765104   | 0,1475116    | 1,756853672  | 0,078943 | 0,11615352 | 0,02838282 | FALSE |
| Rv2456c | 120 | 74  | 0,69743723   | 0,20729779   | 0,993516275  | 0,320458 | 0,39302454 | 0,09603792 | FALSE |
| Rv2458  | 4   | 3   | 0,415037499  | -0,075101941 | -0,069004391 | 0,944986 | 0,95612665 | 0,23342365 | FALSE |
| Rv2460c | 581 | 377 | 0,62397364   | 0,1338342    | 1,430100123  | 0,152688 | 0,20760716 | 0,05073006 | FALSE |
| Rv2462c | 355 | 198 | 0,842318594  | 0,352179154  | 2,831732805  | 0,00463  | 0,00901685 | 0,00220332 | FALSE |
| Rv2465c | 153 | 71  | 1,107640723  | 0,617501283  | 3,112486925  | 0,001855 | 0,00390644 | 0,0009543  | FALSE |
| Rv2467  | 48  | 37  | 0,375509135  | -0,114630305 | -0,36737567  | 0,713339 | 0,7754978  | 0,18949758 | FALSE |
| Rv2468c | 15  | 7   | 1,099535674  | 0,609396234  | 0,963010104  | 0,335542 | 0,40946665 | 0,09996325 | FALSE |

|         |      |     |              |              |              |          |            |            |       |
|---------|------|-----|--------------|--------------|--------------|----------|------------|------------|-------|
| Rv2469c | 12   | 9   | 0,415037499  | -0,075101941 | -0,119520094 | 0,904863 | 0,92536108 | 0,22608797 | FALSE |
| Rv2474c | 9    | 12  | -0,415037499 | -0,905176939 | -1,440533122 | 0,149717 | 0,20456383 | 0,04986607 | FALSE |
| Rv2475c | 38   | 25  | 0,604071324  | 0,113931884  | 0,312263011  | 0,754841 | 0,8073549  | 0,19727933 | FALSE |
| Rv2476c | 263  | 147 | 0,839246644  | 0,349107204  | 2,417168783  | 0,015642 | 0,02730491 | 0,00667212 | FALSE |
| Rv2478c | 58   | 19  | 1,610053482  | 1,119914042  | 3,185485833  | 0,001445 | 0,00308117 | 0,0007527  | FALSE |
| Rv2479c | 10   | 21  | -1,070389328 | -1,560528768 | -2,932665602 | 0,003361 | 0,00675244 | 0,00164957 | FALSE |
| Rv2480c | 17   | 16  | 0,087462841  | -0,402676599 | -0,807301189 | 0,419493 | 0,49415387 | 0,12074949 | FALSE |
| Rv2481c | 4    | 4   | 0            | -0,49013944  | -0,483927361 | 0,628437 | 0,70115661 | 0,17118513 | FALSE |
| Rv2482c | 58   | 21  | 1,465663572  | 0,975524132  | 2,845091953  | 0,00444  | 0,00872554 | 0,00213214 | FALSE |
| Rv2483c | 90   | 74  | 0,282399731  | -0,207739709 | -0,926528189 | 0,354172 | 0,43004973 | 0,10508525 | FALSE |
| Rv2485c | 15   | 5   | 1,584962501  | 1,094823061  | 1,590531181  | 0,111715 | 0,15717801 | 0,03837283 | FALSE |
| Rv2486  | 33   | 20  | 0,722466024  | 0,232326584  | 0,581335186  | 0,561015 | 0,63694197 | 0,15557396 | FALSE |
| Rv2488c | 93   | 67  | 0,473069621  | -0,017069819 | -0,074875122 | 0,940314 | 0,95349947 | 0,23299336 | FALSE |
| Rv2489c | 4    | 0   | NA           | NA           | NA           | NA       | NA         | NA         | FALSE |
| Rv2490c | 24   | 10  | 1,263034406  | 0,772894966  | 1,501791864  | 0,133151 | 0,18477404 | 0,04515065 | FALSE |
| Rv2491  | 5    | 0   | 3,321928095  | 2,831788655  | 1,757822924  | 0,078778 | 0,11610745 | 0,02833413 | FALSE |
| Rv2492  | 21   | 16  | 0,392317423  | -0,097822017 | -0,206756588 | 0,8362   | 0,86890922 | 0,21232322 | FALSE |
| Rv2493  | 4    | 0   | NA           | NA           | NA           | NA       | NA         | NA         | FALSE |
| Rv2494  | 7    | 3   | 1,222392421  | 0,732252981  | 0,773832213  | 0,43903  | 0,5153802  | 0,1258039  | FALSE |
| Rv2497c | 1117 | 744 | 0,586254659  | 0,096115219  | 1,434160656  | 0,151526 | 0,20609916 | 0,05036158 | FALSE |
| Rv2498c | 72   | 64  | 0,169925001  | -0,320214439 | -1,302514323 | 0,192741 | 0,25479084 | 0,06225968 | FALSE |
| Rv2499c | 74   | 80  | -0,112474729 | -0,602614169 | -2,609683972 | 0,009063 | 0,01654484 | 0,00404283 | FALSE |
| Rv2506  | 18   | 10  | 0,847996907  | 0,357857467  | 0,647088374  | 0,517575 | 0,5930544  | 0,14491643 | FALSE |
| Rv2509  | 14   | 5   | 1,485426827  | 0,995287387  | 1,421201948  | 0,155258 | 0,21011357 | 0,05129808 | FALSE |
| Rv2513  | 63   | 43  | 0,551015169  | 0,060875729  | 0,216821197  | 0,828348 | 0,86212626 | 0,21066577 | FALSE |
| Rv2520c | 11   | 21  | -0,932885804 | -1,423025244 | -2,738746948 | 0,006167 | 0,01170244 | 0,00285817 | FALSE |
| Rv2521  | 44   | 55  | -0,321928095 | -0,812067535 | -2,811899731 | 0,004925 | 0,00954445 | 0,00233224 | FALSE |
| Rv2526  | 16   | 5   | 1,678071905  | 1,187932465  | 1,753869718  | 0,079453 | 0,11664034 | 0,02845898 | FALSE |
| Rv2528c | 17   | 3   | 2,502500341  | 2,0123609    | 2,654792404  | 0,007936 | 0,01474613 | 0,00359903 | FALSE |
| Rv2529  | 7    | 3   | 1,222392421  | 0,732252981  | 0,773832213  | 0,43903  | 0,5153802  | 0,1258039  | FALSE |
| Rv2530c | 6    | 6   | 0            | -0,49013944  | -0,592688961 | 0,553389 | 0,62956601 | 0,15381586 | FALSE |
| Rv2531c | 151  | 124 | 0,284208429  | -0,205931011 | -1,189379527 | 0,23429  | 0,29987015 | 0,07327509 | FALSE |
| Rv2532c | 10   | 6   | 0,736965594  | 0,246826154  | 0,339126285  | 0,734515 | 0,79124952 | 0,19318673 | FALSE |
| Rv2535c | 33   | 19  | 0,796466606  | 0,306327166  | 0,75673493   | 0,449209 | 0,52535487 | 0,12837364 | FALSE |
| Rv2537c | 16   | 4   | 2            | 1,50986056   | 2,108212717  | 0,035013 | 0,05619572 | 0,01372612 | FALSE |
| Rv2538c | 40   | 13  | 1,621488377  | 1,131348937  | 2,667089798  | 0,007651 | 0,01427503 | 0,00348819 | FALSE |
| Rv2539c | 10   | 6   | 0,736965594  | 0,246826154  | 0,339126285  | 0,734515 | 0,79124952 | 0,19318673 | FALSE |

|         |     |     |              |              |              |          |            |            |       |
|---------|-----|-----|--------------|--------------|--------------|----------|------------|------------|-------|
| Rv2540c | 66  | 40  | 0,722466024  | 0,232326584  | 0,822157187  | 0,410987 | 0,48559938 | 0,11853923 | FALSE |
| Rv2541  | 6   | 5   | 0,263034406  | -0,227105034 | -0,262384616 | 0,793025 | 0,83979996 | 0,20496008 | FALSE |
| Rv2543  | 10  | 0   | 4,321928095  | 3,831788655  | 2,828613894  | 0,004675 | 0,00909158 | 0,00221937 | FALSE |
| Rv2544  | 8   | 1   | 3            | 2,50986056   | 2,083780734  | 0,03718  | 0,05934533 | 0,01449251 | FALSE |
| Rv2545  | 3   | 0   | NA           | NA           | NA           | NA       | NA         | NA         | FALSE |
| Rv2546  | 2   | 0   | NA           | NA           | NA           | NA       | NA         | NA         | FALSE |
| Rv2547  | 8   | 1   | 3            | 2,50986056   | 2,083780734  | 0,03718  | 0,05934533 | 0,01449251 | FALSE |
| Rv2548  | 37  | 45  | -0,282399731 | -0,772539171 | -2,436259703 | 0,01484  | 0,02597503 | 0,00634716 | FALSE |
| Rv2548A | 163 | 95  | 0,778872546  | 0,288733106  | 1,590255984  | 0,111777 | 0,15706716 | 0,03838031 | FALSE |
| Rv2551c | 21  | 9   | 1,222392421  | 0,732252981  | 1,340331296  | 0,180138 | 0,23942735 | 0,05850552 | FALSE |
| Rv2552c | 70  | 33  | 1,084888898  | 0,594749458  | 2,035589989  | 0,041792 | 0,06576505 | 0,01606477 | FALSE |
| Rv2553c | 200 | 124 | 0,689659879  | 0,199520439  | 1,236260553  | 0,216362 | 0,28106871 | 0,06868084 | FALSE |
| Rv2554c | 60  | 46  | 0,38332864   | -0,1068108   | -0,382206443 | 0,702308 | 0,76478352 | 0,18687948 | FALSE |
| Rv2557  | 153 | 132 | 0,212993723  | -0,277145717 | -1,631271627 | 0,102833 | 0,14618236 | 0,03572054 | FALSE |
| Rv2558  | 568 | 473 | 0,264050746  | -0,226088694 | -2,542594821 | 0,011003 | 0,01985572 | 0,00485187 | FALSE |
| Rv2561  | 30  | 43  | -0,519374159 | -1,009513599 | -2,986803101 | 0,002819 | 0,00574264 | 0,00140325 | FALSE |
| Rv2562  | 9   | 2   | 2,169925001  | 1,679785561  | 1,708058052  | 0,087626 | 0,12673254 | 0,03093349 | FALSE |
| Rv2563  | 10  | 9   | 0,152003093  | -0,338136347 | -0,51414527  | 0,60715  | 0,68208355 | 0,16667124 | FALSE |
| Rv2564  | 8   | 11  | -0,459431619 | -0,949571059 | -1,435758659 | 0,151071 | 0,20573055 | 0,05026274 | FALSE |
| Rv2566  | 43  | 26  | 0,725825037  | 0,235685597  | 0,672804994  | 0,501071 | 0,57693754 | 0,1409574  | FALSE |
| Rv2567  | 35  | 19  | 0,881355504  | 0,391216063  | 0,980762514  | 0,32671  | 0,39981261 | 0,09769663 | FALSE |
| Rv2569c | 18  | 3   | 2,584962501  | 2,094823061  | 2,803354658  | 0,005057 | 0,0097865  | 0,00239021 | FALSE |
| Rv2571c | 5   | 3   | 0,736965594  | 0,246826154  | 0,239797393  | 0,810487 | 0,84737698 | 0,20689551 | FALSE |
| Rv2572c | 28  | 12  | 1,222392421  | 0,732252981  | 1,547689692  | 0,121697 | 0,17027119 | 0,04159189 | FALSE |
| Rv2573  | 2   | 0   | NA           | NA           | NA           | NA       | NA         | NA         | FALSE |
| Rv2576c | 93  | 55  | 0,757799098  | 0,267659658  | 1,117531267  | 0,263767 | 0,33420216 | 0,08166432 | FALSE |
| Rv2577  | 11  | 8   | 0,459431619  | -0,030707821 | -0,046430459 | 0,962967 | 0,97092351 | 0,23718979 | FALSE |
| Rv2578c | 3   | 1   | 1,584962501  | 1,094823061  | 0,711301316  | 0,476898 | 0,55277082 | 0,13487273 | FALSE |
| Rv2579  | 24  | 17  | 0,497499659  | 0,007360219  | 0,01633032   | 0,986971 | 0,99039477 | 0,24197786 | FALSE |
| Rv2581c | 34  | 34  | 0            | -0,49013944  | -1,410928846 | 0,158266 | 0,21377625 | 0,05223752 | FALSE |
| Rv2582  | 7   | 13  | -0,893084796 | -1,383224236 | -2,109047331 | 0,03494  | 0,05614923 | 0,0137204  | FALSE |
| Rv2585c | 62  | 71  | -0,195550809 | -0,685690249 | -2,757421587 | 0,005826 | 0,01109225 | 0,00271046 | FALSE |
| Rv2587c | 107 | 81  | 0,401616984  | -0,088522457 | -0,421693728 | 0,673249 | 0,73994813 | 0,1808108  | FALSE |
| Rv2588c | 18  | 24  | -0,415037499 | -0,905176939 | -2,03724662  | 0,041625 | 0,06566226 | 0,01601735 | FALSE |
| Rv2589  | 43  | 13  | 1,725825037  | 1,235685597  | 2,966207978  | 0,003015 | 0,00611131 | 0,00149295 | FALSE |
| Rv2590  | 320 | 190 | 0,752072487  | 0,261933047  | 2,031055817  | 0,042249 | 0,0663651  | 0,01621671 | FALSE |
| Rv2592c | 9   | 5   | 0,847996907  | 0,357857467  | 0,457556932  | 0,647271 | 0,71694581 | 0,1750659  | FALSE |

|         |     |     |    |              |              |              |          |            |            |       |
|---------|-----|-----|----|--------------|--------------|--------------|----------|------------|------------|-------|
| Rv2593c | NA  | NA  | NA | NA           | NA           | NA           | NA       | NA         | NA         | FALSE |
| Rv2595  |     | 9   | 5  | 0,847996907  | 0,357857467  | 0,457556932  | 0,647271 | 0,71694581 | 0,1750659  | FALSE |
| Rv2597  |     | 15  | 4  | 1,906890596  | 1,416751156  | 1,946542327  | 0,05159  | 0,07965896 | 0,01945745 | FALSE |
| Rv2598  |     | 0   | 1  | NA           | NA           | NA           | NA       | NA         | NA         | FALSE |
| Rv2599  |     | 12  | 2  | 2,584962501  | 2,094823061  | 2,288922835  | 0,022084 | 0,03710731 | 0,00906739 | FALSE |
| Rv2600  |     | 5   | 0  | 3,321928095  | 2,831788655  | 1,757822924  | 0,078778 | 0,11610745 | 0,02833413 | FALSE |
| Rv2602  |     | 59  | 38 | 0,634715536  | 0,144576096  | 0,491143368  | 0,623325 | 0,69764526 | 0,17042084 | FALSE |
| Rv2603c |     | 67  | 37 | 0,856635825  | 0,366496385  | 1,2767121    | 0,201704 | 0,26515865 | 0,06478222 | FALSE |
| Rv2604c |     | 11  | 17 | -0,628031223 | -1,118170663 | -2,041286749 | 0,041222 | 0,06513179 | 0,01591213 | FALSE |
| Rv2605c |     | 78  | 63 | 0,308122295  | -0,182017145 | -0,752377343 | 0,451824 | 0,5282555  | 0,12908243 | FALSE |
| Rv2606c | 100 | 101 |    | -0,014355293 | -0,504494733 | -2,496992764 | 0,012525 | 0,02240528 | 0,00547486 | FALSE |
| Rv2608  |     | 14  | 20 | -0,514573173 | -1,004712613 | -2,028936526 | 0,042465 | 0,0665696  | 0,01626016 | FALSE |
| Rv2610c |     | 18  | 13 | 0,469485283  | -0,020654157 | -0,039879324 | 0,968189 | 0,97518167 | 0,23823009 | FALSE |
| Rv2611c |     | 12  | 9  | 0,415037499  | -0,075101941 | -0,119520094 | 0,904863 | 0,92536108 | 0,22608797 | FALSE |
| Rv2612c |     | 19  | 28 | -0,559427409 | -1,049566849 | -2,488446894 | 0,01283  | 0,02293526 | 0,00560309 | FALSE |
| Rv2614A | NA  | NA  | NA | NA           | NA           | NA           | NA       | NA         | NA         | FALSE |
| Rv2616  |     | 10  | 1  | 3,321928095  | 2,831788655  | 2,485941687  | 0,012921 | 0,02302358 | 0,00561698 | FALSE |
| Rv2618  |     | 14  | 2  | 2,807354922  | 2,317215482  | 2,631401555  | 0,008503 | 0,01561513 | 0,00381296 | FALSE |
| Rv2630  |     | 95  | 67 | 0,503766418  | 0,013626978  | 0,060092292  | 0,952082 | 0,9610652  | 0,23481174 | FALSE |
| Rv2633c | 104 | 112 |    | -0,106915204 | -0,597054644 | -3,062393937 | 0,002196 | 0,00456813 | 0,00111625 | FALSE |
| Rv2634c |     | 46  | 27 | 0,768674454  | 0,278535014  | 0,81631324   | 0,414321 | 0,48828234 | 0,11929674 | FALSE |
| Rv2635  | NA  | NA  | NA | NA           | NA           | NA           | NA       | NA         | NA         | FALSE |
| Rv2636  |     | 28  | 11 | 1,347923303  | 0,857783863  | 1,773997775  | 0,076064 | 0,11259592 | 0,02751349 | FALSE |
| Rv2637  |     | 21  | 6  | 1,807354922  | 1,317215482  | 2,178631209  | 0,029359 | 0,04788939 | 0,01169718 | FALSE |
| Rv2644c |     | 1   | 2  | -1           | -1,49013944  | -0,874809733 | 0,381677 | 0,45754425 | 0,11164947 | FALSE |
| Rv2646  |     | 9   | 16 | -0,830074999 | -1,320214439 | -2,257718328 | 0,023963 | 0,03987064 | 0,00973848 | FALSE |
| Rv2647  |     | 9   | 7  | 0,362570079  | -0,127569361 | -0,1774247   | 0,859175 | 0,88805654 | 0,2165029  | FALSE |
| Rv2648  |     | 28  | 32 | -0,192645078 | -0,682784518 | -1,844185376 | 0,065156 | 0,09793483 | 0,02393097 | FALSE |
| Rv2652c |     | 19  | 16 | 0,247927513  | -0,242211927 | -0,49928829  | 0,617576 | 0,69230242 | 0,169144   | FALSE |
| Rv2653c |     | 25  | 8  | 1,64385619   | 1,15371675   | 2,141866799  | 0,032204 | 0,05214904 | 0,01274029 | FALSE |
| Rv2654c |     | 0   | 3  | NA           | NA           | NA           | NA       | NA         | NA         | FALSE |
| Rv2655c | 116 | 67  |    | 0,791891805  | 0,301752365  | 1,39880707   | 0,161871 | 0,21819318 | 0,05331682 | FALSE |
| Rv2664  | 153 | 71  |    | 1,107640723  | 0,617501283  | 3,112486925  | 0,001855 | 0,00390644 | 0,0009543  | FALSE |
| Rv2665  |     | 77  | 63 | 0,289506617  | -0,200632823 | -0,826654803 | 0,408433 | 0,48287311 | 0,11799296 | FALSE |
| Rv2666  |     | 50  | 39 | 0,358453971  | -0,131685469 | -0,432013931 | 0,665731 | 0,73478821 | 0,17954994 | FALSE |
| Rv2667  |     | 85  | 34 | 1,321928095  | 0,831788655  | 3,010881395  | 0,002605 | 0,00536223 | 0,00131029 | FALSE |
| Rv2668  |     | 47  | 17 | 1,46712601   | 0,97698657   | 2,564297067  | 0,010339 | 0,01875144 | 0,0045799  | FALSE |

|         |     |      |              |              |              |          |            |            |       |
|---------|-----|------|--------------|--------------|--------------|----------|------------|------------|-------|
| Rv2673  | 87  | 36   | 1,273018494  | 0,782879054  | 2,891395126  | 0,003835 | 0,00763357 | 0,00186531 | FALSE |
| Rv2674  | 97  | 53   | 0,871992388  | 0,381852948  | 1,596333022  | 0,110414 | 0,15582525 | 0,03807684 | FALSE |
| Rv2675c | 55  | 24   | 1,196397213  | 0,706257773  | 2,101618728  | 0,035587 | 0,05694162 | 0,01391118 | FALSE |
| Rv2676c | 93  | 66   | 0,494764692  | 0,004625252  | 0,020212078  | 0,983874 | 0,98792202 | 0,24140472 | FALSE |
| Rv2677c | 20  | 18   | 0,152003093  | -0,338136347 | -0,727119405 | 0,467153 | 0,54292611 | 0,13266728 | FALSE |
| Rv2679  | 15  | 20   | -0,415037499 | -0,905176939 | -1,859735564 | 0,062923 | 0,09494363 | 0,02320005 | FALSE |
| Rv2680  | 9   | 16   | -0,830074999 | -1,320214439 | -2,257718328 | 0,023963 | 0,03987064 | 0,00973848 | FALSE |
| Rv2682c | 183 | 182  | 0,007905198  | -0,482234242 | -3,216705278 | 0,001297 | 0,00278071 | 0,00067948 | FALSE |
| Rv2683  | 18  | 6    | 1,584962501  | 1,094823061  | 1,742343196  | 0,081448 | 0,11881062 | 0,02902125 | FALSE |
| Rv2684  | 41  | 13   | 1,657112286  | 1,166972846  | 2,76810735   | 0,005638 | 0,01077178 | 0,00263215 | FALSE |
| Rv2685  | 30  | 24   | 0,321928095  | -0,168211345 | -0,430160685 | 0,667079 | 0,73585948 | 0,17981171 | FALSE |
| Rv2686c | 46  | 13   | 1,823122238  | 1,332982798  | 3,254175128  | 0,001137 | 0,00247332 | 0,00060387 | FALSE |
| Rv2688c | 160 | 150  | 0,093109404  | -0,397030036 | -2,439970363 | 0,014688 | 0,02574437 | 0,00629079 | FALSE |
| Rv2690c | 119 | 55   | 1,11345805   | 0,62331861   | 2,767946559  | 0,005641 | 0,01077182 | 0,00263216 | FALSE |
| Rv2695  | 14  | 9    | 0,637429921  | 0,147290481  | 0,243613624  | 0,80753  | 0,84905895 | 0,20685444 | FALSE |
| Rv2700  | 3   | 1    | 1,584962501  | 1,094823061  | 0,711301316  | 0,476898 | 0,55277082 | 0,13487273 | FALSE |
| Rv2701c | 16  | 8    | 1            | 0,50986056   | 0,846619397  | 0,397207 | 0,47239059 | 0,11537879 | FALSE |
| Rv2702  | 38  | 12   | 1,662965013  | 1,172825573  | 2,675556456  | 0,007461 | 0,01401317 | 0,00342256 | FALSE |
| Rv2704  | 89  | 63   | 0,498453507  | 0,008314067  | 0,035519208  | 0,971666 | 0,97792646 | 0,23883947 | FALSE |
| Rv2706c | NA  | NA   | NA           | NA           | NA           | NA       | NA         | NA         | FALSE |
| Rv2708c | 42  | 23   | 0,868755467  | 0,378616027  | 1,042048117  | 0,297389 | 0,36820085 | 0,08997211 | FALSE |
| Rv2709  | 75  | 27   | 1,473931188  | 0,983791748  | 3,258075242  | 0,001122 | 0,00244298 | 0,00059696 | FALSE |
| Rv2715  | 68  | 26   | 1,387023123  | 0,896883683  | 2,871156349  | 0,00409  | 0,00808423 | 0,00197493 | FALSE |
| Rv2716  | 32  | 13   | 1,299560282  | 0,809420842  | 1,804623893  | 0,071134 | 0,10606206 | 0,02590701 | FALSE |
| Rv2719c | 9   | 6    | 0,584962501  | 0,094823061  | 0,126895046  | 0,899023 | 0,92071509 | 0,2249823  | FALSE |
| Rv2720  | 44  | 27   | 0,704544116  | 0,214404676  | 0,621419116  | 0,534324 | 0,61099116 | 0,14929939 | FALSE |
| Rv2725c | 55  | 24   | 1,196397213  | 0,706257773  | 2,101618728  | 0,035587 | 0,05694162 | 0,01391118 | FALSE |
| Rv2726c | 60  | 32   | 0,906890596  | 0,416751156  | 1,361924986  | 0,173222 | 0,23253015 | 0,05682015 | FALSE |
| Rv2727c | 16  | 15   | 0,093109404  | -0,397030036 | -0,771458612 | 0,440435 | 0,5160988  | 0,12609294 | FALSE |
| Rv2729c | 64  | 31   | 1,04580369   | 0,55566425   | 1,830835454  | 0,067125 | 0,10081675 | 0,024631   | FALSE |
| Rv2730  | 28  | 6    | 2,222392421  | 1,732252981  | 3,078745508  | 0,002079 | 0,00433974 | 0,00106016 | FALSE |
| Rv2735c | 29  | 7    | 2,050626073  | 1,560486633  | 2,9078358    | 0,003639 | 0,00728065 | 0,00177725 | FALSE |
| Rv2736c | 8   | 10   | -0,321928095 | -0,812067535 | -1,198940765 | 0,230551 | 0,29620055 | 0,07234269 | FALSE |
| Rv2737A | NA  | NA   | NA           | NA           | NA           | NA       | NA         | NA         | FALSE |
| Rv2737c | 68  | 26   | 1,387023123  | 0,896883683  | 2,871156349  | 0,00409  | 0,00808423 | 0,00197493 | FALSE |
| Rv2738c | 0   | 3 NA | NA           | NA           | NA           | NA       | NA         | NA         | FALSE |
| Rv2739c | 7   | 11   | -0,652076697 | -1,142216137 | -1,670336483 | 0,094853 | 0,13592669 | 0,03321451 | FALSE |

|         |     |     |              |              |              |          |            |            |       |
|---------|-----|-----|--------------|--------------|--------------|----------|------------|------------|-------|
| Rv2740  | 8   | 20  | -1,321928095 | -1,812067535 | -3,181554503 | 0,001465 | 0,00311904 | 0,00076216 | FALSE |
| Rv2747  | 26  | 13  | 1            | 0,50986056   | 1,079241269  | 0,28048  | 0,35240513 | 0,08611232 | FALSE |
| Rv2751  | 26  | 34  | -0,387023123 | -0,877162563 | -2,361222739 | 0,018215 | 0,03131356 | 0,00764997 | FALSE |
| Rv2752c | 24  | 36  | -0,584962501 | -1,075101941 | -2,877542255 | 0,004008 | 0,00795057 | 0,00194228 | FALSE |
| Rv2754c | 0   | 1   | NA           | NA           | NA           | NA       | NA         | NA         | FALSE |
| Rv2755c | 2   | 2   | 0            | -0,49013944  | -0,342187506 | 0,73221  | 0,79149598 | 0,19316621 | FALSE |
| Rv2756c | 80  | 44  | 0,862496476  | 0,372357036  | 1,415970805  | 0,156784 | 0,21184835 | 0,05176643 | FALSE |
| Rv2757c | 9   | 1   | 3,169925001  | 2,679785561  | 2,291346064  | 0,021943 | 0,036919   | 0,0090175  | FALSE |
| Rv2758c | 8   | 9   | -0,169925001 | -0,660064441 | -0,949188147 | 0,342525 | 0,41688011 | 0,10181958 | FALSE |
| Rv2759c | 11  | 6   | 0,874469118  | 0,384329678  | 0,540782419  | 0,588658 | 0,66446243 | 0,16234195 | FALSE |
| Rv2761c | 14  | 8   | 0,807354922  | 0,317215482  | 0,509439725  | 0,610444 | 0,68519229 | 0,16733468 | FALSE |
| Rv2762c | 2   | 3   | -0,584962501 | -1,075101941 | -0,830648319 | 0,406172 | 0,48063726 | 0,11741104 | FALSE |
| Rv2763c | 60  | 39  | 0,621488377  | 0,131348937  | 0,451007686  | 0,651984 | 0,72104151 | 0,17619085 | FALSE |
| Rv2765  | 10  | 16  | -0,678071905 | -1,168211345 | -2,051097983 | 0,040257 | 0,06369739 | 0,01556484 | FALSE |
| Rv2766c | 6   | 4   | 0,584962501  | 0,094823061  | 0,10360907   | 0,91748  | 0,9353238  | 0,22834339 | FALSE |
| Rv2767c | 15  | 2   | 2,906890596  | 2,416751156  | 2,792180836  | 0,005235 | 0,01009843 | 0,002467   | FALSE |
| Rv2769c | 17  | 4   | 2,087462841  | 1,597323401  | 2,264398215  | 0,02355  | 0,03928292 | 0,00958673 | FALSE |
| Rv2770c | 36  | 17  | 1,08246216   | 0,59232272   | 1,454412084  | 0,145832 | 0,19995587 | 0,04886043 | FALSE |
| Rv2771c | 17  | 5   | 1,765534746  | 1,275395306  | 1,911757353  | 0,055907 | 0,08559816 | 0,02090413 | FALSE |
| Rv2772c | 33  | 24  | 0,459431619  | -0,030707821 | -0,080421706 | 0,935902 | 0,95025917 | 0,23220158 | FALSE |
| Rv2775  | 12  | 8   | 0,584962501  | 0,094823061  | 0,146526204  | 0,883506 | 0,90672561 | 0,22144749 | FALSE |
| Rv2776c | 65  | 74  | -0,187085553 | -0,677224993 | -2,784411925 | 0,005362 | 0,0103003  | 0,00251694 | FALSE |
| Rv2777c | 197 | 178 | 0,146318388  | -0,343821052 | -2,323159802 | 0,020171 | 0,03412741 | 0,00833924 | FALSE |
| Rv2779c | 24  | 4   | 2,584962501  | 2,094823061  | 3,237044548  | 0,001208 | 0,00260782 | 0,00063657 | FALSE |
| Rv2782c | 65  | 38  | 0,77444403   | 0,28430086   | 0,989478842  | 0,322429 | 0,395131   | 0,0965375  | FALSE |
| Rv2786c | 77  | 40  | 0,944858446  | 0,454719006  | 1,672391215  | 0,094447 | 0,13544485 | 0,03309677 | FALSE |
| Rv2787  | 26  | 38  | -0,547487795 | -1,037627235 | -2,871939443 | 0,00408  | 0,0080724  | 0,00197204 | FALSE |
| Rv2792c | 52  | 56  | -0,106915204 | -0,597054644 | -2,165300736 | 0,030365 | 0,04940584 | 0,01207261 | FALSE |
| Rv2796c | 4   | 2   | 1            | 0,50986056   | 0,423305433  | 0,672072 | 0,73990495 | 0,18064746 | FALSE |
| Rv2797c | 23  | 7   | 1,716207034  | 1,226067594  | 2,15603544   | 0,031081 | 0,05046607 | 0,01232656 | FALSE |
| Rv2798c | 19  | 33  | -0,796466606 | -1,286606046 | -3,17836563  | 0,001481 | 0,00315183 | 0,00077017 | FALSE |
| Rv2799  | 18  | 16  | 0,169925001  | -0,320214439 | -0,651217786 | 0,514906 | 0,59025615 | 0,14421149 | FALSE |
| Rv2801c | 3   | 1   | 1,584962501  | 1,094823061  | 0,711301316  | 0,476898 | 0,55277082 | 0,13487273 | FALSE |
| Rv2802c | 14  | 9   | 0,637429921  | 0,147290481  | 0,243613624  | 0,80753  | 0,84905895 | 0,20685444 | FALSE |
| Rv2803  | 4   | 0   | NA           | NA           | NA           | NA       | NA         | NA         | FALSE |
| Rv2804c | NA  | NA  | NA           | NA           | NA           | NA       | NA         | NA         | FALSE |
| Rv2805  | 7   | 2   | 1,807354922  | 1,317215482  | 1,257822137  | 0,208456 | 0,27274955 | 0,06661452 | FALSE |





|         |     |     |              |              |              |          |            |            |       |
|---------|-----|-----|--------------|--------------|--------------|----------|------------|------------|-------|
| Rv2870c | 48  | 15  | 1,678071905  | 1,187932465  | 3,037855994  | 0,002383 | 0,00493862 | 0,00120678 | FALSE |
| Rv2871  | 4   | 5   | -0,321928095 | -0,812067535 | -0,847774643 | 0,396563 | 0,47241624 | 0,11533221 | FALSE |
| Rv2873  | 34  | 17  | 1            | 0,50986056   | 1,234167899  | 0,21714  | 0,28198638 | 0,06881664 | FALSE |
| Rv2879c | 492 | 385 | 0,35379987   | -0,13633957  | -1,404854724 | 0,160064 | 0,21613133 | 0,05280451 | FALSE |
| Rv2880c | 19  | 13  | 0,547487795  | 0,057348355  | 0,112235896  | 0,910636 | 0,93016872 | 0,22723291 | FALSE |
| Rv2881c | 17  | 18  | -0,08246216  | -0,5726016   | -1,182280167 | 0,237095 | 0,30316117 | 0,07407927 | FALSE |
| Rv2882c | 43  | 42  | 0,033947332  | -0,456192108 | -1,468174209 | 0,142057 | 0,19532825 | 0,04772964 | FALSE |
| Rv2884  | 49  | 63  | -0,362570079 | -0,852709519 | -3,137923799 | 0,001701 | 0,00359736 | 0,00087904 | FALSE |
| Rv2886c | 42  | 15  | 1,485426827  | 0,995287387  | 2,461642897  | 0,01383  | 0,02438792 | 0,0059553  | FALSE |
| Rv2891  | 3   | 3   | 0            | -0,49013944  | -0,419092891 | 0,675148 | 0,74088911 | 0,18081208 | FALSE |
| Rv2892c | 41  | 48  | -0,227410496 | -0,717549936 | -2,359444423 | 0,018302 | 0,03143636 | 0,00767998 | FALSE |
| Rv2893  | 5   | 0   | 3,321928095  | 2,831788655  | 1,757822924  | 0,078778 | 0,11610745 | 0,02833413 | FALSE |
| Rv2894c | 16  | 9   | 0,830074999  | 0,339935559  | 0,58132885   | 0,561019 | 0,63666916 | 0,15557396 | FALSE |
| Rv2896c | 20  | 32  | -0,678071905 | -1,168211345 | -2,900734157 | 0,003723 | 0,00742488 | 0,00181431 | FALSE |
| Rv2898c | 16  | 12  | 0,415037499  | -0,075101941 | -0,138010485 | 0,890232 | 0,91266907 | 0,22301621 | FALSE |
| Rv2899c | 31  | 10  | 1,632268215  | 1,142128775  | 2,365881815  | 0,017987 | 0,03098366 | 0,00756437 | FALSE |
| Rv2901c | 63  | 53  | 0,249359469  | -0,240779971 | -0,903613548 | 0,3662   | 0,4419757  | 0,10798275 | FALSE |
| Rv2902c | 105 | 50  | 1,070389328  | 0,580249888  | 2,438488604  | 0,014749 | 0,02583277 | 0,00631098 | FALSE |
| Rv2905  | 42  | 15  | 1,485426827  | 0,995287387  | 2,461642897  | 0,01383  | 0,02438792 | 0,0059553  | FALSE |
| Rv2911  | 4   | 1   | 2            | 1,50986056   | 1,054098848  | 0,291838 | 0,3631117  | 0,08848889 | FALSE |
| Rv2915c | 57  | 28  | 1,025535092  | 0,535395652  | 1,670637149  | 0,094793 | 0,13589138 | 0,03320588 | FALSE |
| Rv2918c | 133 | 106 | 0,327361981  | -0,162777459 | -0,875736301 | 0,381173 | 0,45771284 | 0,11164947 | FALSE |
| Rv2921c | 52  | 18  | 1,530514717  | 1,040375277  | 2,840882245  | 0,004499 | 0,0088061  | 0,00215075 | FALSE |
| Rv2922A | 2   | 0   | NA           | NA           | NA           | NA       | NA         | NA         | FALSE |
| Rv2924c | 19  | 13  | 0,547487795  | 0,057348355  | 0,112235896  | 0,910636 | 0,93016872 | 0,22723291 | FALSE |
| Rv2925c | 306 | 218 | 0,489203518  | -0,000935922 | -0,007427555 | 0,994074 | 0,99534818 | 0,24321935 | FALSE |
| Rv2926c | 273 | 210 | 0,378511623  | -0,111627817 | -0,852942789 | 0,393691 | 0,46985436 | 0,11481176 | FALSE |
| Rv2928  | 19  | 6   | 1,662965013  | 1,172825573  | 1,891880126  | 0,058507 | 0,0891415  | 0,02177377 | FALSE |
| Rv2929  | 11  | 14  | -0,347923303 | -0,838062743 | -1,457443015 | 0,144994 | 0,19905153 | 0,0486309  | FALSE |
| Rv2932  | 50  | 43  | 0,217591435  | -0,272548005 | -0,91623105  | 0,359546 | 0,43495231 | 0,10627832 | FALSE |
| Rv2936  | 82  | 76  | 0,109624491  | -0,380514949 | -1,669159233 | 0,095086 | 0,13616067 | 0,03327168 | FALSE |
| Rv2937  | 25  | 9   | 1,473931188  | 0,983791748  | 1,880983603  | 0,059974 | 0,09121677 | 0,02228503 | FALSE |
| Rv2938  | 19  | 26  | -0,452512205 | -0,942651645 | -2,193930664 | 0,02824  | 0,04623847 | 0,01129006 | FALSE |
| Rv2939  | 34  | 25  | 0,443606651  | -0,046532789 | -0,124038731 | 0,901285 | 0,92278878 | 0,22548902 | FALSE |
| Rv2942  | 136 | 131 | 0,05403984   | -0,4360996   | -2,487628682 | 0,01286  | 0,02297232 | 0,00561342 | FALSE |
| Rv2943  | 25  | 33  | -0,40053793  | -0,89067737  | -2,356552867 | 0,018445 | 0,03160573 | 0,00772305 | FALSE |
| Rv2943A | 5   | 14  | -1,485426827 | -1,975566267 | -2,82097278  | 0,004788 | 0,00929017 | 0,00226954 | FALSE |

|         |     |      |              |              |              |          |            |            |       |
|---------|-----|------|--------------|--------------|--------------|----------|------------|------------|-------|
| Rv2944  | 5   | 6    | -0,263034406 | -0,753173846 | -0,870175473 | 0,384205 | 0,4594453  | 0,11225105 | FALSE |
| Rv2945c | 7   | 7    | 0            | -0,49013944  | -0,640178006 | 0,522057 | 0,5980147  | 0,14612851 | FALSE |
| Rv2948c | 78  | 91   | -0,222392421 | -0,712531861 | -3,228941745 | 0,001242 | 0,00267471 | 0,00065358 | FALSE |
| Rv2949c | 129 | 87   | 0,56828376   | 0,07814432   | 0,397107203  | 0,691288 | 0,75446653 | 0,18435846 | FALSE |
| Rv2950c | 336 | 246  | 0,449802917  | -0,040336523 | -0,337748819 | 0,735552 | 0,7914942  | 0,19340639 | FALSE |
| Rv2951c | 31  | 39   | -0,331205908 | -0,821345349 | -2,390995609 | 0,016803 | 0,02918806 | 0,00713228 | FALSE |
| Rv2952  | 19  | 20   | -0,074000581 | -0,564140021 | -1,229621171 | 0,218839 | 0,2823146  | 0,06898528 | FALSE |
| Rv2953  | 14  | 8    | 0,807354922  | 0,317215482  | 0,509439725  | 0,610444 | 0,68519229 | 0,16733468 | FALSE |
| Rv2954c | 37  | 11   | 1,750021747  | 1,259882307  | 2,79362078   | 0,005212 | 0,01006103 | 0,00245847 | FALSE |
| Rv2955c | 12  | 5    | 1,263034406  | 0,772894966  | 1,061917443  | 0,288273 | 0,36091911 | 0,08810802 | FALSE |
| Rv2956  | 14  | 6    | 1,222392421  | 0,732252981  | 1,094369965  | 0,273793 | 0,34539192 | 0,08427609 | FALSE |
| Rv2957  | 1   | 4    | -2           | -2,49013944  | -1,73847386  | 0,082127 | 0,11955538 | 0,02919775 | FALSE |
| Rv2959c | 96  | 95   | 0,015106892  | -0,475032548 | -2,291921831 | 0,02191  | 0,03689485 | 0,00901548 | FALSE |
| Rv2960c | 5   | 2    | 1,321928095  | 0,831788655  | 0,730202124  | 0,465267 | 0,54186288 | 0,13217096 | FALSE |
| Rv2961  | 2   | 1    | 1            | 0,50986056   | 0,29932164   | 0,764695 | 0,81465901 | 0,19872219 | FALSE |
| Rv2965c | 12  | 13   | -0,115477217 | -0,605616657 | -1,056607944 | 0,290691 | 0,36313071 | 0,08848889 | FALSE |
| Rv2966c | 1   | 2    | -1           | -1,49013944  | -0,874809733 | 0,381677 | 0,45754425 | 0,11164947 | FALSE |
| Rv2968c | 17  | 15   | 0,180572246  | -0,309567194 | -0,610698257 | 0,541399 | 0,6177252  | 0,15087876 | FALSE |
| Rv2969c | 43  | 44   | -0,033166864 | -0,523306304 | -1,703872728 | 0,088405 | 0,127529   | 0,03116248 | FALSE |
| Rv2970A | 23  | 4    | 2,523561956  | 2,033422516  | 3,10890893   | 0,001878 | 0,00394979 | 0,0009649  | FALSE |
| Rv2970c | 75  | 60   | 0,321928095  | -0,168211345 | -0,680176275 | 0,496393 | 0,57197229 | 0,13976489 | FALSE |
| Rv2971  | 36  | 19   | 0,921997488  | 0,431858048  | 1,090302479  | 0,27558  | 0,34680619 | 0,08471689 | FALSE |
| Rv2972c | 19  | 5    | 1,925999419  | 1,435859979  | 2,212974896  | 0,026899 | 0,04416316 | 0,01078927 | FALSE |
| Rv2973c | 22  | 17   | 0,371968777  | -0,118170663 | -0,256546453 | 0,797529 | 0,84274128 | 0,20590107 | FALSE |
| Rv2974c | 3   | 4    | -0,415037499 | -0,905176939 | -0,831685343 | 0,405587 | 0,48052657 | 0,11734837 | FALSE |
| Rv2975c | 15  | 3    | 2,321928095  | 1,831788655  | 2,342126898  | 0,019174 | 0,03259697 | 0,00795239 | FALSE |
| Rv2976c | 25  | 7    | 1,836501268  | 1,346361828  | 2,417444951  | 0,01563  | 0,02730251 | 0,00667004 | FALSE |
| Rv2977c | 28  | 12   | 1,222392421  | 0,732252981  | 1,547689692  | 0,121697 | 0,17027119 | 0,04159189 | FALSE |
| Rv2978c | 17  | 17   | 0            | -0,49013944  | -0,997657214 | 0,318446 | 0,39074001 | 0,09546469 | FALSE |
| Rv2979c | 18  | 5    | 1,847996907  | 1,357857467  | 2,064658238  | 0,038955 | 0,06181253 | 0,015092   | FALSE |
| Rv2980  | 0   | 4 NA | NA           | NA           | NA           | NA       | NA         | NA         | FALSE |
| Rv2981c | 23  | 5    | 2,201633861  | 1,711494421  | 2,766839373  | 0,00566  | 0,01079791 | 0,00263725 | FALSE |
| Rv2982c | 20  | 16   | 0,321928095  | -0,168211345 | -0,351220998 | 0,725423 | 0,78622678 | 0,19211927 | FALSE |
| Rv2983  | 4   | 1    | 2            | 1,50986056   | 1,054098848  | 0,291838 | 0,3631117  | 0,08848889 | FALSE |
| Rv2984  | 100 | 60   | 0,736965594  | 0,246826154  | 1,072500266  | 0,283495 | 0,35573571 | 0,08692617 | FALSE |
| Rv2985  | 26  | 33   | -0,343954401 | -0,834093841 | -2,22859069  | 0,025841 | 0,04254203 | 0,0103954  | FALSE |
| Rv2991  | 22  | 6    | 1,874469118  | 1,384329678  | 2,316420535  | 0,020535 | 0,03469194 | 0,00847169 | FALSE |

|         |     |      |              |              |              |          |            |            |       |
|---------|-----|------|--------------|--------------|--------------|----------|------------|------------|-------|
| Rv2992c | 25  | 20   | 0,321928095  | -0,168211345 | -0,392679099 | 0,694557 | 0,75729252 | 0,18502318 | FALSE |
| Rv2993c | 13  | 2    | 2,700439718  | 2,210300278  | 2,463914956  | 0,013743 | 0,02428322 | 0,00593107 | FALSE |
| Rv2994  | 20  | 9    | 1,152003093  | 0,661863653  | 1,196801284  | 0,231384 | 0,29673386 | 0,07250871 | FALSE |
| Rv2997  | 6   | 3    | 1            | 0,50986056   | 0,518442029  | 0,60415  | 0,67939679 | 0,16589528 | FALSE |
| Rv2998A | 0   | 1 NA | NA           | NA           | NA           | NA       | NA         | NA         | FALSE |
| Rv2999  | 3   | 3    | 0            | -0,49013944  | -0,419092891 | 0,675148 | 0,74088911 | 0,18081208 | FALSE |
| Rv3002c | 57  | 64   | -0,167109986 | -0,657249426 | -2,521758785 | 0,011677 | 0,02097451 | 0,00512525 | FALSE |
| Rv3004  | 8   | 9    | -0,169925001 | -0,660064441 | -0,949188147 | 0,342525 | 0,41688011 | 0,10181958 | FALSE |
| Rv3006  | 89  | 42   | 1,083416008  | 0,593276568  | 2,290219044  | 0,022009 | 0,03699684 | 0,0090404  | FALSE |
| Rv3012c | 1   | 0 NA | NA           | NA           | NA           | NA       | NA         | NA         | FALSE |
| Rv3013  | 1   | 3    | -1,584962501 | -2,075101941 | -1,348183825 | 0,177599 | 0,23702158 | 0,05781885 | FALSE |
| Rv3014c | 48  | 18   | 1,415037499  | 0,924898059  | 2,475517108  | 0,013304 | 0,0235884  | 0,00576266 | FALSE |
| Rv3016  | 44  | 13   | 1,7589919    | 1,26885246   | 3,063380451  | 0,002189 | 0,00455795 | 0,00111376 | FALSE |
| Rv3018A | 20  | 5    | 2            | 1,50986056   | 2,357059072  | 0,01842  | 0,0315904  | 0,00771592 | FALSE |
| Rv3018c | 114 | 77   | 0,566103473  | 0,075964033  | 0,363022633  | 0,716588 | 0,77859656 | 0,19025478 | FALSE |
| Rv3019c | 8   | 3    | 1,415037499  | 0,924898059  | 1,01059623   | 0,31221  | 0,38484184 | 0,09391985 | FALSE |
| Rv3024c | 32  | 42   | -0,392317423 | -0,882456863 | -2,637792798 | 0,008345 | 0,0154291  | 0,0037702  | FALSE |
| Rv3025c | 43  | 46   | -0,097297201 | -0,587436641 | -1,934055847 | 0,053106 | 0,08180669 | 0,01998996 | FALSE |
| Rv3030  | 13  | 1    | 3,700439718  | 3,210300278  | 3,009274622  | 0,002619 | 0,00537933 | 0,00131309 | FALSE |
| Rv3031  | 2   | 2    | 0            | -0,49013944  | -0,342187506 | 0,73221  | 0,79149598 | 0,19316621 | FALSE |
| Rv3032A | 2   | 0 NA | NA           | NA           | NA           | NA       | NA         | NA         | FALSE |
| Rv3033  | 1   | 6    | -2,584962501 | -3,075101941 | -2,375894006 | 0,017506 | 0,03034303 | 0,00741121 | FALSE |
| Rv3035  | 17  | 13   | 0,387023123  | -0,103116317 | -0,196273468 | 0,844396 | 0,87649306 | 0,21417638 | FALSE |
| Rv3039c | 7   | 3    | 1,222392421  | 0,732252981  | 0,773832213  | 0,43903  | 0,5153802  | 0,1258039  | FALSE |
| Rv3042c | 37  | 49   | -0,405256478 | -0,895395919 | -2,884463118 | 0,003921 | 0,00779175 | 0,00190396 | FALSE |
| Rv3047c | 82  | 39   | 1,072149786  | 0,582010346  | 2,160767079  | 0,030713 | 0,04995234 | 0,01220616 | FALSE |
| Rv3048c | 497 | 289  | 0,782176359  | 0,292036919  | 2,807859185  | 0,004987 | 0,00966023 | 0,00236054 | FALSE |
| Rv3056  | 21  | 3    | 2,807354922  | 2,317215482  | 3,222805685  | 0,001269 | 0,00272966 | 0,00066664 | FALSE |
| Rv3057c | 62  | 55   | 0,172836597  | -0,317302843 | -1,197074404 | 0,231278 | 0,29669476 | 0,07249916 | FALSE |
| Rv3064c | 18  | 2    | 3,169925001  | 2,679785561  | 3,240464224  | 0,001193 | 0,00258246 | 0,00063051 | FALSE |
| Rv3065  | 11  | 8    | 0,459431619  | -0,030707821 | -0,046430459 | 0,962967 | 0,97092351 | 0,23718979 | FALSE |
| Rv3066  | 12  | 3    | 2            | 1,50986056   | 1,825761434  | 0,067886 | 0,10178369 | 0,02485715 | FALSE |
| Rv3067  | 16  | 5    | 1,678071905  | 1,187932465  | 1,753869718  | 0,079453 | 0,11664034 | 0,02845898 | FALSE |
| Rv3069  | 15  | 5    | 1,584962501  | 1,094823061  | 1,590531181  | 0,111715 | 0,15717801 | 0,03837283 | FALSE |
| Rv3070  | 29  | 24   | 0,273018494  | -0,217120946 | -0,550549163 | 0,581943 | 0,65831011 | 0,16086206 | FALSE |
| Rv3071  | 10  | 1    | 3,321928095  | 2,831788655  | 2,485941687  | 0,012921 | 0,02302358 | 0,00561698 | FALSE |
| Rv3073c | 55  | 65   | -0,2410081   | -0,73114754  | -2,791151054 | 0,005252 | 0,01012062 | 0,00247242 | FALSE |

|         |     |     |              |              |              |          |            |            |       |
|---------|-----|-----|--------------|--------------|--------------|----------|------------|------------|-------|
| Rv3075c | 72  | 28  | 1,362570079  | 0,872430639  | 2,886058746  | 0,003901 | 0,0077563  | 0,0018953  | FALSE |
| Rv3076  | 46  | 57  | -0,309328058 | -0,799467498 | -2,824319745 | 0,004738 | 0,00920055 | 0,00224821 | FALSE |
| Rv3081  | 166 | 82  | 1,017487427  | 0,527347987  | 2,812330931  | 0,004918 | 0,0095364  | 0,00233028 | FALSE |
| Rv3083  | 25  | 5   | 2,321928095  | 1,831788655  | 3,023688881  | 0,002497 | 0,00515942 | 0,00126073 | FALSE |
| Rv3084  | 1   | 2   | -1           | -1,49013944  | -0,874809733 | 0,381677 | 0,45754425 | 0,11164947 | FALSE |
| Rv3085  | 2   | 5   | -1,321928095 | -1,812067535 | -1,59075933  | 0,111664 | 0,15738926 | 0,03837283 | FALSE |
| Rv3087  | 30  | 8   | 1,906890596  | 1,416751156  | 2,75285188   | 0,005908 | 0,01123458 | 0,00274457 | FALSE |
| Rv3088  | 14  | 7   | 1            | 0,50986056   | 0,7919386    | 0,428396 | 0,50410976 | 0,12312662 | FALSE |
| Rv3090  | 8   | 2   | 2            | 1,50986056   | 1,490724428  | 0,136034 | 0,18800645 | 0,04583507 | FALSE |
| Rv3091  | 47  | 17  | 1,46712601   | 0,97698657   | 2,564297067  | 0,010339 | 0,01875144 | 0,0045799  | FALSE |
| Rv3092c | 137 | 96  | 0,513069582  | 0,022930142  | 0,121238992  | 0,903502 | 0,92457398 | 0,22591092 | FALSE |
| Rv3093c | 66  | 57  | 0,211504105  | -0,278635335 | -1,077335549 | 0,28133  | 0,35324603 | 0,0863178  | FALSE |
| Rv3096  | 9   | 7   | 0,362570079  | -0,127569361 | -0,1774247   | 0,859175 | 0,88805654 | 0,2165029  | FALSE |
| Rv3098c | 174 | 171 | 0,025090981  | -0,465048459 | -3,015796231 | 0,002563 | 0,00528723 | 0,00129197 | FALSE |
| Rv3100c | 22  | 8   | 1,459431619  | 0,969292179  | 1,742882808  | 0,081354 | 0,11876176 | 0,02902015 | FALSE |
| Rv3101c | 46  | 37  | 0,31410859   | -0,17603085  | -0,558185332 | 0,576718 | 0,65296699 | 0,15955643 | FALSE |
| Rv3102c | 34  | 15  | 1,180572246  | 0,690432806  | 1,619772712  | 0,105281 | 0,14949918 | 0,03653103 | FALSE |
| Rv3103c | 6   | 1   | 2,584962501  | 2,094823061  | 1,61850815   | 0,105553 | 0,14972211 | 0,03655894 | FALSE |
| Rv3106  | 29  | 16  | 0,857980995  | 0,367841555  | 0,842810355  | 0,399335 | 0,47448693 | 0,11592611 | FALSE |
| Rv3107c | 25  | 21  | 0,251538767  | -0,238600673 | -0,563834669 | 0,572867 | 0,64954828 | 0,15859348 | FALSE |
| Rv3108  | NA  | NA  | NA           | NA           | NA           | NA       | NA         | NA         | FALSE |
| Rv3109  | 12  | 0   | 4,584962501  | 4,094823061  | 3,163753838  | 0,001557 | 0,00330363 | 0,00080682 | FALSE |
| Rv3110  | 3   | 0   | NA           | NA           | NA           | NA       | NA         | NA         | FALSE |
| Rv3111  | 4   | 0   | NA           | NA           | NA           | NA       | NA         | NA         | FALSE |
| Rv3112  | 2   | 1   | 1            | 0,50986056   | 0,29932164   | 0,764695 | 0,81465901 | 0,19872219 | FALSE |
| Rv3113  | 1   | 1   | 0            | -0,49013944  | -0,241962819 | 0,808809 | 0,84800619 | 0,20685444 | FALSE |
| Rv3114  | 3   | 2   | 0,584962501  | 0,094823061  | 0,073262463  | 0,941597 | 0,95430504 | 0,2331297  | FALSE |
| Rv3121  | 46  | 41  | 0,166009951  | -0,324129489 | -1,054520028 | 0,291645 | 0,36397358 | 0,08848889 | FALSE |
| Rv3125c | 23  | 33  | -0,520832163 | -1,010971603 | -2,619642805 | 0,008802 | 0,01611843 | 0,00393771 | FALSE |
| Rv3126c | 14  | 26  | -0,893084796 | -1,383224236 | -2,982677128 | 0,002857 | 0,00581758 | 0,00142156 | FALSE |
| Rv3129  | 9   | 1   | 3,169925001  | 2,679785561  | 2,291346064  | 0,021943 | 0,036919   | 0,0090175  | FALSE |
| Rv3136A | 6   | 3   | 1            | 0,50986056   | 0,518442029  | 0,60415  | 0,67939679 | 0,16589528 | FALSE |
| Rv3141  | 55  | 26  | 1,080919995  | 0,590780555  | 1,793528052  | 0,072889 | 0,10847169 | 0,02650571 | FALSE |
| Rv3142c | 47  | 17  | 1,46712601   | 0,97698657   | 2,564297067  | 0,010339 | 0,01875144 | 0,0045799  | FALSE |
| Rv3143  | 11  | 1   | 3,459431619  | 2,969292179  | 2,669508357  | 0,007596 | 0,01423725 | 0,00347479 | FALSE |
| Rv3144c | 35  | 12  | 1,544320516  | 1,054181076  | 2,355952752  | 0,018475 | 0,03162907 | 0,00772537 | FALSE |
| Rv3145  | 38  | 30  | 0,341036918  | -0,149102522 | -0,427717564 | 0,668857 | 0,73740419 | 0,18018917 | FALSE |

|         |     |      |              |              |              |          |            |            |       |
|---------|-----|------|--------------|--------------|--------------|----------|------------|------------|-------|
| Rv3146  | 40  | 34   | 0,234465254  | -0,255674186 | -0,766512247 | 0,443372 | 0,51930593 | 0,12689555 | FALSE |
| Rv3147  | 17  | 15   | 0,180572246  | -0,309567194 | -0,610698257 | 0,541399 | 0,6177252  | 0,15087876 | FALSE |
| Rv3148  | 23  | 18   | 0,353636955  | -0,136502485 | -0,303969218 | 0,761151 | 0,81299125 | 0,19865933 | FALSE |
| Rv3149  | 4   | 7    | -0,807354922 | -1,297494362 | -1,473418725 | 0,140638 | 0,19351375 | 0,0472696  | FALSE |
| Rv3151  | 28  | 26   | 0,106915204  | -0,383224236 | -0,982716382 | 0,325747 | 0,39888436 | 0,09746981 | FALSE |
| Rv3152  | 13  | 5    | 1,378511623  | 0,888372183  | 1,245248184  | 0,213041 | 0,27795633 | 0,0678523  | FALSE |
| Rv3153  | 22  | 5    | 2,137503524  | 1,647364084  | 2,633732374  | 0,008445 | 0,01556324 | 0,0037976  | FALSE |
| Rv3154  | 20  | 14   | 0,514573173  | 0,024433733  | 0,049341963  | 0,960647 | 0,96908439 | 0,23680163 | FALSE |
| Rv3156  | 35  | 39   | -0,156119202 | -0,646258642 | -1,93926451  | 0,052469 | 0,08088906 | 0,01976573 | FALSE |
| Rv3157  | 22  | 18   | 0,289506617  | -0,200632823 | -0,441839472 | 0,658605 | 0,72774589 | 0,17782911 | FALSE |
| Rv3162c | 22  | 4    | 2,459431619  | 1,969292179  | 2,977584745  | 0,002905 | 0,00590433 | 0,00144238 | FALSE |
| Rv3163c | 21  | 15   | 0,485426827  | -0,004712613 | -0,00980115  | 0,99218  | 0,99421675 | 0,24288055 | FALSE |
| Rv3164c | 31  | 20   | 0,632268215  | 0,142128775  | 0,350123489  | 0,726246 | 0,78690087 | 0,19228399 | FALSE |
| Rv3165c | 16  | 25   | -0,64385619  | -1,13399563  | -2,503601263 | 0,012294 | 0,02203659 | 0,00538354 | FALSE |
| Rv3170  | 27  | 11   | 1,295455884  | 0,805316443  | 1,65041452   | 0,098858 | 0,14112272 | 0,03447789 | FALSE |
| Rv3178  | 1   | 0 NA | NA           | NA           | NA           | NA       | NA         | NA         | FALSE |
| Rv3179  | 59  | 21   | 1,490325627  | 1,000186187  | 2,929512135  | 0,003395 | 0,00681607 | 0,00166555 | FALSE |
| Rv3180c | 27  | 7    | 1,94753258   | 1,45739314   | 2,667643133  | 0,007639 | 0,01427541 | 0,00348578 | FALSE |
| Rv3182  | 22  | 12   | 0,874469118  | 0,384329678  | 0,76478921   | 0,444397 | 0,51996122 | 0,12703664 | FALSE |
| Rv3183  | 9   | 16   | -0,830074999 | -1,320214439 | -2,257718328 | 0,023963 | 0,03987064 | 0,00973848 | FALSE |
| Rv3184  | 38  | 41   | -0,109624491 | -0,599763931 | -1,860248803 | 0,06285  | 0,09490741 | 0,0231912  | FALSE |
| Rv3186  | 31  | 34   | -0,133266531 | -0,623405971 | -1,753582984 | 0,079502 | 0,11649353 | 0,0284659  | FALSE |
| Rv3190A | 10  | 13   | -0,378511623 | -0,868651063 | -1,447989933 | 0,14762  | 0,20201702 | 0,04935543 | FALSE |
| Rv3191c | 5   | 2    | 1,321928095  | 0,831788655  | 0,730202124  | 0,465267 | 0,54186288 | 0,13217096 | FALSE |
| Rv3192  | 1   | 6    | -2,584962501 | -3,075101941 | -2,375894006 | 0,017506 | 0,03034303 | 0,00741121 | FALSE |
| Rv3193c | 139 | 83   | 0,743901641  | 0,253762201  | 1,298476295  | 0,194124 | 0,25644557 | 0,06266403 | FALSE |
| Rv3194c | 42  | 27   | 0,637429921  | 0,147290481  | 0,421962424  | 0,673052 | 0,74004499 | 0,18080902 | FALSE |
| Rv3195  | 48  | 35   | 0,455679484  | -0,034459956 | -0,108915992 | 0,913269 | 0,93237018 | 0,22783029 | FALSE |
| Rv3196  | 3   | 3    | 0            | -0,49013944  | -0,419092891 | 0,675148 | 0,74088911 | 0,18081208 | FALSE |
| Rv3196A | 2   | 3    | -0,584962501 | -1,075101941 | -0,830648319 | 0,406172 | 0,48063726 | 0,11741104 | FALSE |
| Rv3197  | 208 | 145  | 0,520530628  | 0,030391188  | 0,197753219  | 0,843238 | 0,87552379 | 0,21393953 | FALSE |
| Rv3197A | 7   | 6    | 0,222392421  | -0,267747019 | -0,336487378 | 0,736503 | 0,79208087 | 0,19349646 | FALSE |
| Rv3198A | 13  | 6    | 1,115477217  | 0,625337777  | 0,917426625  | 0,358919 | 0,434733   | 0,10616378 | FALSE |
| Rv3199c | 17  | 11   | 0,628031223  | 0,137891783  | 0,251729613  | 0,80125  | 0,846101   | 0,20674392 | FALSE |
| Rv3202c | 112 | 58   | 0,949373927  | 0,459234487  | 2,035476239  | 0,041803 | 0,0657433  | 0,01606477 | FALSE |
| Rv3204  | 51  | 36   | 0,502500341  | 0,0123609    | 0,039945591  | 0,968137 | 0,97563175 | 0,23823009 | FALSE |
| Rv3209  | 27  | 21   | 0,362570079  | -0,127569361 | -0,307314387 | 0,758604 | 0,810714   | 0,19809688 | FALSE |

|         |     |     |              |              |              |          |            |            |       |
|---------|-----|-----|--------------|--------------|--------------|----------|------------|------------|-------|
| Rv3210c | 26  | 6   | 2,115477217  | 1,625337777  | 2,835696123  | 0,004573 | 0,00892353 | 0,00217943 | FALSE |
| Rv3213c | 70  | 54  | 0,374395515  | -0,115743925 | -0,448055007 | 0,654113 | 0,72319174 | 0,17671628 | FALSE |
| Rv3214  | 19  | 8   | 1,247927513  | 0,757788073  | 1,313540566  | 0,189001 | 0,25044057 | 0,06117591 | FALSE |
| Rv3215  | 10  | 13  | -0,378511623 | -0,868651063 | -1,447989933 | 0,14762  | 0,20201702 | 0,04935543 | FALSE |
| Rv3217c | 33  | 16  | 1,044394119  | 0,554254679  | 1,311620417  | 0,189648 | 0,25112797 | 0,06136464 | FALSE |
| Rv3218  | 1   | 1   | 0            | -0,49013944  | -0,241962819 | 0,808809 | 0,84800619 | 0,20685444 | FALSE |
| Rv3224  | 14  | 20  | -0,514573173 | -1,004712613 | -2,028936526 | 0,042465 | 0,0665696  | 0,01626016 | FALSE |
| Rv3224A | 8   | 2   | 2            | 1,50986056   | 1,490724428  | 0,136034 | 0,18800645 | 0,04583507 | FALSE |
| Rv3224B | 1   | 4   | -2           | -2,49013944  | -1,73847386  | 0,082127 | 0,11955538 | 0,02919775 | FALSE |
| Rv3225c | 80  | 48  | 0,736965594  | 0,246826154  | 0,959255751  | 0,33743  | 0,41125588 | 0,10049286 | FALSE |
| Rv3226c | 46  | 16  | 1,523561956  | 1,033422516  | 2,657295386  | 0,007877 | 0,01466151 | 0,00358263 | FALSE |
| Rv3229c | 932 | 561 | 0,732329184  | 0,242189744  | 3,217748808  | 0,001292 | 0,00277214 | 0,00067739 | FALSE |
| Rv3232c | 51  | 49  | 0,057715498  | -0,432423942 | -1,509404174 | 0,131196 | 0,18219009 | 0,04451925 | FALSE |
| Rv3235  | 3   | 0   | NA           | NA           | NA           | NA       | NA         | NA         | FALSE |
| Rv3237c | 38  | 11  | 1,788495895  | 1,298356455  | 2,898191142  | 0,003753 | 0,00748153 | 0,00182816 | FALSE |
| Rv3238c | 26  | 26  | 0            | -0,49013944  | -1,233809762 | 0,217274 | 0,28206589 | 0,06881664 | FALSE |
| Rv3241c | 148 | 137 | 0,111421283  | -0,378718157 | -2,231329023 | 0,025659 | 0,04227837 | 0,01033098 | FALSE |
| Rv3242c | 13  | 7   | 0,893084796  | 0,402945356  | 0,614383992  | 0,538962 | 0,61557329 | 0,15037508 | FALSE |
| Rv3243c | 71  | 53  | 0,421826665  | -0,068312775 | -0,264146943 | 0,791667 | 0,83961391 | 0,20496008 | FALSE |
| Rv3244c | 69  | 66  | 0,064130337  | -0,426009103 | -1,727748041 | 0,084033 | 0,12212521 | 0,02984203 | FALSE |
| Rv3246c | 174 | 85  | 1,03355256   | 0,54341312   | 2,958784665  | 0,003089 | 0,00625235 | 0,0015278  | FALSE |
| Rv3253c | 14  | 3   | 2,222392421  | 1,732252981  | 2,176985072  | 0,029482 | 0,04803921 | 0,01173622 | FALSE |
| Rv3254  | 112 | 75  | 0,578536232  | 0,088396792  | 0,417813111  | 0,676084 | 0,74077079 | 0,1809877  | FALSE |
| Rv3255c | 40  | 16  | 1,321928095  | 0,831788655  | 2,065377787  | 0,038887 | 0,06181754 | 0,015092   | FALSE |
| Rv3256c | 26  | 10  | 1,378511623  | 0,888372183  | 1,761063731  | 0,078228 | 0,11560221 | 0,02824276 | FALSE |
| Rv3259  | 5   | 0   | 3,321928095  | 2,831788655  | 1,757822924  | 0,078778 | 0,11610745 | 0,02833413 | FALSE |
| Rv3261  | 26  | 40  | -0,621488377 | -1,111627817 | -3,116469216 | 0,00183  | 0,00385718 | 0,00094252 | FALSE |
| Rv3262  | 11  | 16  | -0,540568381 | -1,030707821 | -1,853314183 | 0,063837 | 0,09613761 | 0,02348042 | FALSE |
| Rv3263  | 11  | 2   | 2,459431619  | 1,969292179  | 2,105458637  | 0,035251 | 0,05649774 | 0,01379707 | FALSE |
| Rv3265c | 56  | 27  | 1,05246742   | 0,56232798   | 1,731115975  | 0,083431 | 0,12134018 | 0,02965021 | FALSE |
| Rv3269  | 57  | 29  | 0,974909019  | 0,484769579  | 1,525994644  | 0,127011 | 0,17713526 | 0,04328407 | FALSE |
| Rv3270  | 144 | 72  | 1            | 0,50986056   | 2,540131223  | 0,011081 | 0,01997768 | 0,00488167 | FALSE |
| Rv3271c | 47  | 23  | 1,031026896  | 0,540887456  | 1,531118339  | 0,12574  | 0,17564489 | 0,04288732 | FALSE |
| Rv3275c | 14  | 12  | 0,222392421  | -0,267747019 | -0,475868675 | 0,634168 | 0,70573548 | 0,1724016  | FALSE |
| Rv3276c | 29  | 6   | 2,273018494  | 1,782879054  | 3,196645425  | 0,00139  | 0,00297173 | 0,00072616 | FALSE |
| Rv3277  | 20  | 5   | 2            | 1,50986056   | 2,357059072  | 0,01842  | 0,0315904  | 0,00771592 | FALSE |
| Rv3278c | 6   | 7   | -0,222392421 | -0,712531861 | -0,895464602 | 0,370539 | 0,44617759 | 0,108959   | FALSE |

|         |     |    |              |              |              |          |            |            |       |
|---------|-----|----|--------------|--------------|--------------|----------|------------|------------|-------|
| Rv3279c | 54  | 22 | 1,295455884  | 0,805316443  | 2,334086367  | 0,019591 | 0,0331831  | 0,00810673 | FALSE |
| Rv3280  | 49  | 37 | 0,405256478  | -0,084882962 | -0,273445262 | 0,784511 | 0,83270327 | 0,20347608 | FALSE |
| Rv3281  | 4   | 9  | -1,169925001 | -1,660064441 | -2,007391752 | 0,044708 | 0,06956948 | 0,01699634 | FALSE |
| Rv3282  | 31  | 24 | 0,36923381   | -0,12090563  | -0,311732653 | 0,755244 | 0,80734374 | 0,19727933 | FALSE |
| Rv3284  | 45  | 15 | 1,584962501  | 1,094823061  | 2,754937481  | 0,00587  | 0,01117137 | 0,00272979 | FALSE |
| Rv3285  | 115 | 58 | 0,987509056  | 0,497369616  | 2,219122622  | 0,026478 | 0,04351771 | 0,01063382 | FALSE |
| Rv3286c | 93  | 48 | 0,95419631   | 0,46405687   | 1,872686939  | 0,061112 | 0,09282027 | 0,02268119 | FALSE |
| Rv3287c | 150 | 82 | 0,871266686  | 0,381127246  | 1,981672791  | 0,047516 | 0,07363075 | 0,01799212 | FALSE |
| Rv3291c | 12  | 13 | -0,115477217 | -0,605616657 | -1,056607944 | 0,290691 | 0,36313071 | 0,08848889 | FALSE |
| Rv3292  | 10  | 2  | 2,321928095  | 1,831788655  | 1,912333526  | 0,055833 | 0,08570343 | 0,02090413 | FALSE |
| Rv3293  | 15  | 4  | 1,906890596  | 1,416751156  | 1,946542327  | 0,05159  | 0,07965896 | 0,01945745 | FALSE |
| Rv3294c | 3   | 1  | 1,584962501  | 1,094823061  | 0,711301316  | 0,476898 | 0,55277082 | 0,13487273 | FALSE |
| Rv3297  | 3   | 3  | 0            | -0,49013944  | -0,419092891 | 0,675148 | 0,74088911 | 0,18081208 | FALSE |
| Rv3298c | 30  | 40 | -0,415037499 | -0,905176939 | -2,630117356 | 0,008536 | 0,01565584 | 0,0038256  | FALSE |
| Rv3299c | 92  | 36 | 1,353636955  | 0,863497515  | 3,234013468  | 0,001221 | 0,00262912 | 0,00064244 | FALSE |
| Rv3302c | 67  | 70 | -0,063193826 | -0,553333267 | -2,260704409 | 0,023778 | 0,03959548 | 0,00967539 | FALSE |
| Rv3303c | 23  | 14 | 0,716207034  | 0,226067594  | 0,472759215  | 0,636385 | 0,70739634 | 0,17280738 | FALSE |
| Rv3304  | 7   | 3  | 1,222392421  | 0,732252981  | 0,773832213  | 0,43903  | 0,5153802  | 0,1258039  | FALSE |
| Rv3305c | 14  | 15 | -0,099535674 | -0,589675114 | -1,108162795 | 0,267792 | 0,33891618 | 0,0828028  | FALSE |
| Rv3306c | 10  | 8  | 0,321928095  | -0,168211345 | -0,248348112 | 0,803865 | 0,84760176 | 0,20685444 | FALSE |
| Rv3307  | 25  | 8  | 1,64385619   | 1,15371675   | 2,141866799  | 0,032204 | 0,05214904 | 0,01274029 | FALSE |
| Rv3308  | 8   | 5  | 0,678071905  | 0,187932465  | 0,233318158  | 0,815514 | 0,85081047 | 0,20778966 | FALSE |
| Rv3310  | 5   | 3  | 0,736965594  | 0,246826154  | 0,239797393  | 0,810487 | 0,84737698 | 0,20689551 | FALSE |
| Rv3311  | 26  | 25 | 0,056583528  | -0,433555912 | -1,080724679 | 0,27982  | 0,3516883  | 0,08593716 | FALSE |
| Rv3313c | 8   | 7  | 0,192645078  | -0,297494362 | -0,401752025 | 0,687867 | 0,751467   | 0,18359983 | FALSE |
| Rv3315c | 8   | 2  | 2            | 1,50986056   | 1,490724428  | 0,136034 | 0,18800645 | 0,04583507 | FALSE |
| Rv3317  | 10  | 1  | 3,321928095  | 2,831788655  | 2,485941687  | 0,012921 | 0,02302358 | 0,00561698 | FALSE |
| Rv3319  | 12  | 17 | -0,502500341 | -0,992639781 | -1,851974713 | 0,064029 | 0,09629695 | 0,02352621 | FALSE |
| Rv3320c | 13  | 1  | 3,700439718  | 3,210300278  | 3,009274622  | 0,002619 | 0,00537933 | 0,00131309 | FALSE |
| Rv3321c | 8   | 0  | 4            | 3,50986056   | 2,450385202  | 0,01427  | 0,02506779 | 0,00612271 | FALSE |
| Rv3322c | 12  | 5  | 1,263034406  | 0,772894966  | 1,061917443  | 0,288273 | 0,36091911 | 0,08810802 | FALSE |
| Rv3324c | 14  | 6  | 1,222392421  | 0,732252981  | 1,094369965  | 0,273793 | 0,34539192 | 0,08427609 | FALSE |
| Rv3325  | 27  | 33 | -0,289506617 | -0,779646057 | -2,102862015 | 0,035478 | 0,05680235 | 0,01388    | FALSE |
| Rv3327  | 26  | 28 | -0,106915204 | -0,597054644 | -1,531049773 | 0,125757 | 0,17554296 | 0,04288732 | FALSE |
| Rv3328c | 26  | 38 | -0,547487795 | -1,037627235 | -2,871939443 | 0,00408  | 0,0080724  | 0,00197204 | FALSE |
| Rv3329  | 2   | 1  | 1            | 0,50986056   | 0,29932164   | 0,764695 | 0,81465901 | 0,19872219 | FALSE |
| Rv3330  | 13  | 1  | 3,700439718  | 3,210300278  | 3,009274622  | 0,002619 | 0,00537933 | 0,00131309 | FALSE |



|         |     |      |              |              |              |          |            |            |       |
|---------|-----|------|--------------|--------------|--------------|----------|------------|------------|-------|
| Rv3331  | 49  | 38   | 0,366782331  | -0,123357109 | -0,400045903 | 0,689123 | 0,75231316 | 0,18383227 | FALSE |
| Rv3332  | 2   | 2    | 0            | -0,49013944  | -0,342187506 | 0,73221  | 0,79149598 | 0,19316621 | FALSE |
| Rv3335c | 29  | 16   | 0,857980995  | 0,367841555  | 0,842810355  | 0,399335 | 0,47448693 | 0,11592611 | FALSE |
| Rv3336c | 17  | 3    | 2,502500341  | 2,0123609    | 2,654792404  | 0,007936 | 0,01474613 | 0,00359903 | FALSE |
| Rv3337  | 101 | 76   | 0,410283969  | -0,079855471 | -0,369030339 | 0,712105 | 0,77458787 | 0,18927523 | FALSE |
| Rv3344c | 1   | 1    | 0            | -0,49013944  | -0,241962819 | 0,808809 | 0,84800619 | 0,20685444 | FALSE |
| Rv3345c | 12  | 5    | 1,263034406  | 0,772894966  | 1,061917443  | 0,288273 | 0,36091911 | 0,08810802 | FALSE |
| Rv3346c | 1   | 4    | -2           | -2,49013944  | -1,73847386  | 0,082127 | 0,11955538 | 0,02919775 | FALSE |
| Rv3348  | 40  | 14   | 1,514573173  | 1,024433733  | 2,460206437  | 0,013886 | 0,02444712 | 0,0059738  | FALSE |
| Rv3349c | 5   | 1    | 2,321928095  | 1,831788655  | 1,352220414  | 0,176305 | 0,23614142 | 0,0576334  | FALSE |
| Rv3350c | 347 | 187  | 0,891897393  | 0,401757953  | 3,166409875  | 0,001543 | 0,00327895 | 0,00080123 | FALSE |
| Rv3351c | 21  | 6    | 1,807354922  | 1,317215482  | 2,178631209  | 0,029359 | 0,04788939 | 0,01169718 | FALSE |
| Rv3353c | 5   | 3    | 0,736965594  | 0,246826154  | 0,239797393  | 0,810487 | 0,84737698 | 0,20689551 | FALSE |
| Rv3355c | 22  | 5    | 2,137503524  | 1,647364084  | 2,633732374  | 0,008445 | 0,01556324 | 0,0037976  | FALSE |
| Rv3356c | 15  | 11   | 0,447458977  | -0,042680463 | -0,075515343 | 0,939805 | 0,953602   | 0,23292763 | FALSE |
| Rv3358  | 5   | 1    | 2,321928095  | 1,831788655  | 1,352220414  | 0,176305 | 0,23614142 | 0,0576334  | FALSE |
| Rv3359  | 11  | 1    | 3,459431619  | 2,969292179  | 2,669508357  | 0,007596 | 0,01423725 | 0,00347479 | FALSE |
| Rv3361c | 0   | 2 NA | NA           | NA           | NA           | NA       | NA         | NA         | FALSE |
| Rv3362c | 17  | 5    | 1,765534746  | 1,275395306  | 1,911757353  | 0,055907 | 0,08559816 | 0,02090413 | FALSE |
| Rv3363c | 13  | 5    | 1,378511623  | 0,888372183  | 1,245248184  | 0,213041 | 0,27795633 | 0,0678523  | FALSE |
| Rv3364c | 16  | 10   | 0,678071905  | 0,187932465  | 0,329964181  | 0,741427 | 0,79551382 | 0,19430853 | FALSE |
| Rv3366  | NA  | NA   | NA           | NA           | NA           | NA       | NA         | NA         | FALSE |
| Rv3367  | 39  | 12   | 1,700439718  | 1,210300278  | 2,779036316  | 0,005452 | 0,01045689 | 0,00255182 | FALSE |
| Rv3368c | 2   | 2    | 0            | -0,49013944  | -0,342187506 | 0,73221  | 0,79149598 | 0,19316621 | FALSE |
| Rv3369  | 27  | 40   | -0,567040593 | -1,057180033 | -2,991922284 | 0,002772 | 0,00565902 | 0,00138282 | FALSE |
| Rv3375  | 16  | 5    | 1,678071905  | 1,187932465  | 1,753869718  | 0,079453 | 0,11664034 | 0,02845898 | FALSE |
| Rv3377c | 27  | 16   | 0,754887502  | 0,264748062  | 0,595858192  | 0,55127  | 0,62742909 | 0,15331609 | FALSE |
| Rv3378c | 14  | 6    | 1,222392421  | 0,732252981  | 1,094369965  | 0,273793 | 0,34539192 | 0,08427609 | FALSE |
| Rv3379c | 80  | 31   | 1,367731785  | 0,877592344  | 3,05745377   | 0,002232 | 0,00463669 | 0,001133   | FALSE |
| Rv3380c | 11  | 21   | -0,932885804 | -1,423025244 | -2,738746948 | 0,006167 | 0,01170244 | 0,00285817 | FALSE |
| Rv3381c | 9   | 14   | -0,637429921 | -1,127569361 | -1,864962744 | 0,062187 | 0,09423313 | 0,02302644 | FALSE |
| Rv3382c | 77  | 84   | -0,125530882 | -0,615670322 | -2,725904715 | 0,006413 | 0,01215583 | 0,00297035 | FALSE |
| Rv3383c | 253 | 215  | 0,234800725  | -0,255338715 | -1,92555175  | 0,05416  | 0,08333185 | 0,02036264 | FALSE |
| Rv3386  | 14  | 9    | 0,637429921  | 0,147290481  | 0,243613624  | 0,80753  | 0,84905895 | 0,20685444 | FALSE |
| Rv3387  | 8   | 8    | 0            | -0,49013944  | -0,684379888 | 0,493735 | 0,56958239 | 0,1391398  | FALSE |
| Rv3388  | 4   | 7    | -0,807354922 | -1,297494362 | -1,473418725 | 0,140638 | 0,19351375 | 0,0472696  | FALSE |
| Rv3390  | 9   | 11   | -0,289506617 | -0,779646057 | -1,21405926  | 0,224725 | 0,28933449 | 0,07065404 | FALSE |

|         |     |     |              |              |              |          |            |            |       |
|---------|-----|-----|--------------|--------------|--------------|----------|------------|------------|-------|
| Rv3391  | 48  | 18  | 1,415037499  | 0,924898059  | 2,475517108  | 0,013304 | 0,0235884  | 0,00576266 | FALSE |
| Rv3393  | 9   | 19  | -1,078002512 | -1,568141952 | -2,799430009 | 0,005119 | 0,00988666 | 0,00241587 | FALSE |
| Rv3394c | 6   | 4   | 0,584962501  | 0,094823061  | 0,10360907   | 0,91748  | 0,9353238  | 0,22834339 | FALSE |
| Rv3395A | 2   | 0   | NA           | NA           | NA           | NA       | NA         | NA         | FALSE |
| Rv3397c | 16  | 16  | 0            | -0,49013944  | -0,967868514 | 0,33311  | 0,40694344 | 0,09942354 | FALSE |
| Rv3398c | 1   | 3   | -1,584962501 | -2,075101941 | -1,348183825 | 0,177599 | 0,23702158 | 0,05781885 | FALSE |
| Rv3400  | 28  | 16  | 0,807354922  | 0,317215482  | 0,720465623  | 0,471238 | 0,54742995 | 0,13374793 | FALSE |
| Rv3401  | 19  | 15  | 0,341036918  | -0,149102522 | -0,302435927 | 0,76232  | 0,81390532 | 0,19872219 | FALSE |
| Rv3409c | 53  | 28  | 0,920565533  | 0,430426092  | 1,318880363  | 0,187209 | 0,24823483 | 0,06065768 | FALSE |
| Rv3412  | 179 | 114 | 0,650925763  | 0,160786323  | 0,948835064  | 0,342705 | 0,41677393 | 0,10184123 | FALSE |
| Rv3413c | 24  | 33  | -0,459431619 | -0,949571059 | -2,486862352 | 0,012888 | 0,02301133 | 0,00561698 | FALSE |
| Rv3415c | 16  | 7   | 1,192645078  | 0,702505638  | 1,128205588  | 0,259233 | 0,32904446 | 0,08036482 | FALSE |
| Rv3416  | 37  | 39  | -0,075948853 | -0,566088293 | -1,722458697 | 0,084986 | 0,12341842 | 0,03015804 | FALSE |
| Rv3419c | 35  | 47  | -0,425305835 | -0,915445275 | -2,878215114 | 0,003999 | 0,00793968 | 0,00194011 | FALSE |
| Rv3420c | 25  | 17  | 0,556393349  | 0,066253908  | 0,148507312  | 0,881942 | 0,90595426 | 0,22134629 | FALSE |
| Rv3421c | 8   | 5   | 0,678071905  | 0,187932465  | 0,233318158  | 0,815514 | 0,85081047 | 0,20778966 | FALSE |
| Rv3422c | 4   | 3   | 0,415037499  | -0,075101941 | -0,069004391 | 0,944986 | 0,95612665 | 0,23342365 | FALSE |
| Rv3424c | 23  | 11  | 1,064130337  | 0,573990897  | 1,130112835  | 0,258429 | 0,32850391 | 0,08021969 | FALSE |
| Rv3429  | 139 | 95  | 0,549085464  | 0,058946024  | 0,311980076  | 0,755056 | 0,80736374 | 0,19727933 | FALSE |
| Rv3430c | 44  | 16  | 1,459431619  | 0,969292179  | 2,464847336  | 0,013707 | 0,02424755 | 0,00592369 | FALSE |
| Rv3431c | 5   | 5   | 0            | -0,49013944  | -0,54104788  | 0,588475 | 0,66483241 | 0,16234195 | FALSE |
| Rv3433c | 4   | 5   | -0,321928095 | -0,812067535 | -0,847774643 | 0,396563 | 0,47241624 | 0,11533221 | FALSE |
| Rv3435c | 21  | 15  | 0,485426827  | -0,004712613 | -0,00980115  | 0,99218  | 0,99421675 | 0,24288055 | FALSE |
| Rv3436c | 95  | 91  | 0,062060968  | -0,428078472 | -2,037938443 | 0,041556 | 0,06559278 | 0,01601735 | FALSE |
| Rv3441c | 37  | 24  | 0,624490865  | 0,134351425  | 0,362067343  | 0,717302 | 0,77915526 | 0,1903913  | FALSE |
| Rv3442c | 33  | 34  | -0,043068722 | -0,533208162 | -1,523493996 | 0,127635 | 0,17781495 | 0,04345016 | FALSE |
| Rv3443c | 15  | 14  | 0,099535674  | -0,390603766 | -0,734052619 | 0,462917 | 0,54057703 | 0,13205378 | FALSE |
| Rv3444c | 5   | 2   | 1,321928095  | 0,831788655  | 0,730202124  | 0,465267 | 0,54186288 | 0,13217096 | FALSE |
| Rv3446c | 4   | 9   | -1,169925001 | -1,660064441 | -2,007391752 | 0,044708 | 0,06956948 | 0,01699634 | FALSE |
| Rv3447c | 28  | 35  | -0,321928095 | -0,812067535 | -2,243072347 | 0,024892 | 0,04118807 | 0,01006455 | FALSE |
| Rv3448  | 7   | 8   | -0,192645078 | -0,682784518 | -0,922068105 | 0,356493 | 0,43259956 | 0,10567548 | FALSE |
| Rv3449  | 3   | 6   | -1           | -1,49013944  | -1,515219994 | 0,129717 | 0,18039306 | 0,04403309 | FALSE |
| Rv3451  | 50  | 21  | 1,251538767  | 0,761399327  | 2,139710382  | 0,032378 | 0,05233311 | 0,01278791 | FALSE |
| Rv3452  | 7   | 4   | 0,807354922  | 0,317215482  | 0,360226021  | 0,718678 | 0,78010787 | 0,19054463 | FALSE |
| Rv3453  | 4   | 3   | 0,415037499  | -0,075101941 | -0,069004391 | 0,944986 | 0,95612665 | 0,23342365 | FALSE |
| Rv3455c | 80  | 34  | 1,234465254  | 0,744325814  | 2,653754073  | 0,00796  | 0,01476699 | 0,0036084  | FALSE |
| Rv3460c | 650 | 530 | 0,294447358  | -0,195692082 | -2,342081129 | 0,019177 | 0,03254429 | 0,00795239 | FALSE |

|         |     |     |              |              |              |          |            |            |       |
|---------|-----|-----|--------------|--------------|--------------|----------|------------|------------|-------|
| Rv3462c | 578 | 450 | 0,361144491  | -0,128994949 | -1,438962368 | 0,150161 | 0,20459854 | 0,04999489 | FALSE |
| Rv3466  | 53  | 31  | 0,773724144  | 0,283584704  | 0,891336245  | 0,372749 | 0,44828583 | 0,10954135 | FALSE |
| Rv3467  | 19  | 9   | 1,078002512  | 0,587863072  | 1,049446782  | 0,293973 | 0,36443262 | 0,08902305 | FALSE |
| Rv3469c | 20  | 7   | 1,514573173  | 1,024433733  | 1,739604211  | 0,081929 | 0,11937722 | 0,02917055 | FALSE |
| Rv3470c | 23  | 14  | 0,716207034  | 0,226067594  | 0,472759215  | 0,636385 | 0,70739634 | 0,17280738 | FALSE |
| Rv3471c | 14  | 2   | 2,807354922  | 2,317215482  | 2,631401555  | 0,008503 | 0,01561513 | 0,00381296 | FALSE |
| Rv3473c | 0   | 5   | -3,321928095 | -3,812067535 | -2,366327617 | 0,017966 | 0,03101478 | 0,00756437 | FALSE |
| Rv3474  | 24  | 36  | -0,584962501 | -1,075101941 | -2,877542255 | 0,004008 | 0,00795057 | 0,00194228 | FALSE |
| Rv3481c | 31  | 14  | 1,146841388  | 0,656701948  | 1,479721384  | 0,138948 | 0,19138993 | 0,04676729 | FALSE |
| Rv3482c | 13  | 9   | 0,530514717  | 0,040375277  | 0,065553521  | 0,947733 | 0,95754166 | 0,23392057 | FALSE |
| Rv3484  | 59  | 63  | -0,094636874 | -0,584776314 | -2,254227932 | 0,024182 | 0,040183   | 0,00981896 | FALSE |
| Rv3486  | 9   | 3   | 1,584962501  | 1,094823061  | 1,232015087  | 0,217943 | 0,28199774 | 0,06881664 | FALSE |
| Rv3488  | 2   | 0   | NA           | NA           | NA           | NA       | NA         | NA         | FALSE |
| Rv3489  | 42  | 27  | 0,637429921  | 0,147290481  | 0,421962424  | 0,673052 | 0,74004499 | 0,18080902 | FALSE |
| Rv3490  | 174 | 151 | 0,204538757  | -0,285600684 | -1,795365478 | 0,072595 | 0,10807678 | 0,02640921 | FALSE |
| Rv3492c | 2   | 9   | -2,169925001 | -2,660064441 | -2,704836017 | 0,006834 | 0,01292302 | 0,00315782 | FALSE |
| Rv3493c | 5   | 5   | 0            | -0,49013944  | -0,54104788  | 0,588475 | 0,66483241 | 0,16234195 | FALSE |
| Rv3494c | 14  | 9   | 0,637429921  | 0,147290481  | 0,243613624  | 0,80753  | 0,84905895 | 0,20685444 | FALSE |
| Rv3495c | 20  | 13  | 0,621488377  | 0,131348937  | 0,260379437  | 0,794571 | 0,84018417 | 0,20530409 | FALSE |
| Rv3496c | 13  | 15  | -0,206450877 | -0,696590318 | -1,285055122 | 0,198773 | 0,26192295 | 0,06394851 | FALSE |
| Rv3497c | 9   | 3   | 1,584962501  | 1,094823061  | 1,232015087  | 0,217943 | 0,28199774 | 0,06881664 | FALSE |
| Rv3498c | 10  | 6   | 0,736965594  | 0,246826154  | 0,339126285  | 0,734515 | 0,79124952 | 0,19318673 | FALSE |
| Rv3499c | 28  | 21  | 0,415037499  | -0,075101941 | -0,182572964 | 0,855133 | 0,88587207 | 0,21643949 | FALSE |
| Rv3500c | 26  | 19  | 0,452512205  | -0,037627235 | -0,087573756 | 0,930215 | 0,94497695 | 0,23091083 | FALSE |
| Rv3506  | 52  | 58  | -0,157541277 | -0,647680717 | -2,369603018 | 0,017807 | 0,03080952 | 0,00752849 | FALSE |
| Rv3508  | 13  | 22  | -0,7589919   | -1,249131341 | -2,535927327 | 0,011215 | 0,02020045 | 0,0049361  | FALSE |
| Rv3509c | 36  | 14  | 1,362570079  | 0,872430639  | 2,040697302  | 0,041281 | 0,0651848  | 0,0159283  | FALSE |
| Rv3510c | 4   | 1   | 2            | 1,50986056   | 1,054098848  | 0,291838 | 0,3631117  | 0,08848889 | FALSE |
| Rv3511  | 1   | 0   | NA           | NA           | NA           | NA       | NA         | NA         | FALSE |
| Rv3512  | 5   | 2   | 1,321928095  | 0,831788655  | 0,730202124  | 0,465267 | 0,54186288 | 0,13217096 | FALSE |
| Rv3514  | 23  | 19  | 0,275634443  | -0,214504997 | -0,484169049 | 0,628266 | 0,70186764 | 0,17118513 | FALSE |
| Rv3522  | 11  | 3   | 1,874469118  | 1,384329678  | 1,637945495  | 0,101433 | 0,14445518 | 0,03525992 | FALSE |
| Rv3523  | 222 | 159 | 0,481532911  | -0,008606529 | -0,058249331 | 0,95355  | 0,96217386 | 0,235113   | FALSE |
| Rv3524  | 199 | 165 | 0,270302406  | -0,219837034 | -1,461191206 | 0,143963 | 0,19780979 | 0,04833602 | FALSE |
| Rv3525c | 16  | 2   | 3            | 2,50986056   | 2,946920872  | 0,00321  | 0,00647214 | 0,00157947 | FALSE |
| Rv3527  | 107 | 48  | 1,156504486  | 0,666365046  | 2,785055749  | 0,005352 | 0,01029253 | 0,00251442 | FALSE |
| Rv3528c | 45  | 16  | 1,491853096  | 1,001713656  | 2,561645485  | 0,010418 | 0,0188689  | 0,00461022 | FALSE |

|         |    |    |              |              |              |          |            |            |       |
|---------|----|----|--------------|--------------|--------------|----------|------------|------------|-------|
| Rv3532  | 27 | 9  | 1,584962501  | 1,094823061  | 2,133939061  | 0,032848 | 0,05300436 | 0,01294659 | FALSE |
| Rv3539  | 69 | 27 | 1,353636955  | 0,863497515  | 2,800689964  | 0,005099 | 0,0098579  | 0,00240884 | FALSE |
| Rv3540c | 10 | 17 | -0,765534746 | -1,255674186 | -2,238331413 | 0,025199 | 0,04154691 | 0,0101501  | FALSE |
| Rv3541c | 11 | 3  | 1,874469118  | 1,384329678  | 1,637945495  | 0,101433 | 0,14445518 | 0,03525992 | FALSE |
| Rv3548c | 43 | 26 | 0,725825037  | 0,235685597  | 0,672804994  | 0,501071 | 0,57693754 | 0,1409574  | FALSE |
| Rv3549c | 45 | 32 | 0,491853096  | 0,001713656  | 0,005211496  | 0,995842 | 0,99584185 | 0,24333998 | FALSE |
| Rv3550  | 10 | 0  | 4,321928095  | 3,831788655  | 2,828613894  | 0,004675 | 0,00909158 | 0,00221937 | FALSE |
| Rv3551  | 6  | 6  | 0            | -0,49013944  | -0,592688961 | 0,553389 | 0,62956601 | 0,15381586 | FALSE |
| Rv3552  | 1  | 3  | -1,584962501 | -2,075101941 | -1,348183825 | 0,177599 | 0,23702158 | 0,05781885 | FALSE |
| Rv3553  | 2  | 1  | 1            | 0,50986056   | 0,29932164   | 0,764695 | 0,81465901 | 0,19872219 | FALSE |
| Rv3554  | 10 | 6  | 0,736965594  | 0,246826154  | 0,339126285  | 0,734515 | 0,79124952 | 0,19318673 | FALSE |
| Rv3555c | 14 | 7  | 1            | 0,50986056   | 0,7919386    | 0,428396 | 0,50410976 | 0,12312662 | FALSE |
| Rv3557c | 32 | 10 | 1,678071905  | 1,187932465  | 2,480372686  | 0,013125 | 0,02330131 | 0,00569252 | FALSE |
| Rv3558  | 38 | 15 | 1,341036918  | 0,850897478  | 2,052516854  | 0,040119 | 0,06354349 | 0,01552409 | FALSE |
| Rv3559c | 16 | 4  | 2            | 1,50986056   | 2,108212717  | 0,035013 | 0,05619572 | 0,01372612 | FALSE |
| Rv3561  | 1  | 1  | 0            | -0,49013944  | -0,241962819 | 0,808809 | 0,84800619 | 0,20685444 | FALSE |
| Rv3563  | 8  | 4  | 1            | 0,50986056   | 0,598646295  | 0,549409 | 0,62576674 | 0,15284302 | FALSE |
| Rv3564  | 1  | 3  | -1,584962501 | -2,075101941 | -1,348183825 | 0,177599 | 0,23702158 | 0,05781885 | FALSE |
| Rv3565  | 6  | 4  | 0,584962501  | 0,094823061  | 0,10360907   | 0,91748  | 0,9353238  | 0,22834339 | FALSE |
| Rv3566c | 13 | 4  | 1,700439718  | 1,210300278  | 1,604449886  | 0,108615 | 0,1535353  | 0,03751049 | FALSE |
| Rv3577  | 15 | 2  | 2,906890596  | 2,416751156  | 2,792180836  | 0,005235 | 0,01009843 | 0,002467   | FALSE |
| Rv3578  | 1  | 3  | -1,584962501 | -2,075101941 | -1,348183825 | 0,177599 | 0,23702158 | 0,05781885 | FALSE |
| Rv3579c | 93 | 44 | 1,079727192  | 0,589587752  | 2,328058132  | 0,019909 | 0,03369948 | 0,00823467 | FALSE |
| Rv3584  | 6  | 4  | 0,584962501  | 0,094823061  | 0,10360907   | 0,91748  | 0,9353238  | 0,22834339 | FALSE |
| Rv3586  | 3  | 3  | 0            | -0,49013944  | -0,419092891 | 0,675148 | 0,74088911 | 0,18081208 | FALSE |
| Rv3587c | 19 | 17 | 0,160464672  | -0,329674768 | -0,68996026  | 0,490219 | 0,56602776 | 0,13831231 | FALSE |
| Rv3588c | 12 | 12 | 0            | -0,49013944  | -0,838194739 | 0,401921 | 0,47676271 | 0,11649985 | FALSE |
| Rv3589  | 14 | 2  | 2,807354922  | 2,317215482  | 2,631401555  | 0,008503 | 0,01561513 | 0,00381296 | FALSE |
| Rv3590c | 9  | 7  | 0,362570079  | -0,127569361 | -0,1774247   | 0,859175 | 0,88805654 | 0,2165029  | FALSE |
| Rv3591c | 2  | 1  | 1            | 0,50986056   | 0,29932164   | 0,764695 | 0,81465901 | 0,19872219 | FALSE |
| Rv3594  | 12 | 8  | 0,584962501  | 0,094823061  | 0,146526204  | 0,883506 | 0,90672561 | 0,22144749 | FALSE |
| Rv3595c | 87 | 37 | 1,23349013   | 0,74335069   | 2,764278041  | 0,005705 | 0,01086712 | 0,00265545 | FALSE |
| Rv3598c | 95 | 45 | 1,078002512  | 0,587863072  | 2,346780119  | 0,018936 | 0,03234766 | 0,00790435 | FALSE |
| Rv3599c | 4  | 1  | 2            | 1,50986056   | 1,054098848  | 0,291838 | 0,3631117  | 0,08848889 | FALSE |
| Rv3604c | 57 | 34 | 0,745427173  | 0,255287733  | 0,836218099  | 0,403032 | 0,47793526 | 0,11678637 | FALSE |
| Rv3605c | 28 | 7  | 2            | 1,50986056   | 2,788923152  | 0,005288 | 0,01018045 | 0,00248704 | FALSE |
| Rv3606c | 9  | 10 | -0,152003093 | -0,642142533 | -0,976394728 | 0,328869 | 0,40226563 | 0,09828065 | FALSE |

|         |     |     |              |              |              |          |            |            |       |
|---------|-----|-----|--------------|--------------|--------------|----------|------------|------------|-------|
| Rv3607c | 15  | 5   | 1,584962501  | 1,094823061  | 1,590531181  | 0,111715 | 0,15717801 | 0,03837283 | FALSE |
| Rv3611  | 7   | 4   | 0,807354922  | 0,317215482  | 0,360226021  | 0,718678 | 0,78010787 | 0,19054463 | FALSE |
| Rv3617  | 51  | 42  | 0,280107919  | -0,210031521 | -0,705410114 | 0,480555 | 0,55552619 | 0,13574619 | FALSE |
| Rv3618  | 16  | 2   | 3            | 2,50986056   | 2,946920872  | 0,00321  | 0,00647214 | 0,00157947 | FALSE |
| Rv3619c | 23  | 7   | 1,716207034  | 1,226067594  | 2,15603544   | 0,031081 | 0,05046607 | 0,01232656 | FALSE |
| Rv3621c | 11  | 2   | 2,459431619  | 1,969292179  | 2,105458637  | 0,035251 | 0,05649774 | 0,01379707 | FALSE |
| Rv3622c | 6   | 0   | 3,584962501  | 3,094823061  | 2,010691768  | 0,044358 | 0,06917655 | 0,01688348 | FALSE |
| Rv3624c | 16  | 5   | 1,678071905  | 1,187932465  | 1,753869718  | 0,079453 | 0,11664034 | 0,02845898 | FALSE |
| Rv3625c | 9   | 11  | -0,289506617 | -0,779646057 | -1,21405926  | 0,224725 | 0,28933449 | 0,07065404 | FALSE |
| Rv3626c | 35  | 18  | 0,959358016  | 0,469218575  | 1,160517644  | 0,245838 | 0,31351987 | 0,07661048 | FALSE |
| Rv3627c | 44  | 35  | 0,330148602  | -0,159990838 | -0,494793519 | 0,620746 | 0,69515706 | 0,16984153 | FALSE |
| Rv3628  | 5   | 4   | 0,321928095  | -0,168211345 | -0,175607701 | 0,860602 | 0,88718358 | 0,2165029  | FALSE |
| Rv3630  | 31  | 25  | 0,310340121  | -0,179799319 | -0,468334655 | 0,639545 | 0,71010075 | 0,17351741 | FALSE |
| Rv3631  | 51  | 45  | 0,180572246  | -0,309567194 | -1,057800529 | 0,290146 | 0,36268299 | 0,08848889 | FALSE |
| Rv3632  | 18  | 8   | 1,169925001  | 0,679785561  | 1,162511389  | 0,245028 | 0,31258855 | 0,0763829  | FALSE |
| Rv3633  | 182 | 131 | 0,474371639  | -0,015767801 | -0,09674197  | 0,922931 | 0,93855384 | 0,22934131 | FALSE |
| Rv3634c | 10  | 2   | 2,321928095  | 1,831788655  | 1,912333526  | 0,055833 | 0,08570343 | 0,02090413 | FALSE |
| Rv3636  | 137 | 82  | 0,740480078  | 0,250340638  | 1,272471596  | 0,203206 | 0,26686326 | 0,06519869 | FALSE |
| Rv3637  | 7   | 17  | -1,280107919 | -1,770247359 | -2,886388531 | 0,003897 | 0,00775213 | 0,00189428 | FALSE |
| Rv3638  | 4   | 1   | 2            | 1,50986056   | 1,054098848  | 0,291838 | 0,3631117  | 0,08848889 | FALSE |
| Rv3639c | 9   | 2   | 2,169925001  | 1,679785561  | 1,708058052  | 0,087626 | 0,12673254 | 0,03093349 | FALSE |
| Rv3640c | 20  | 3   | 2,736965594  | 2,246826154  | 3,087022158  | 0,002022 | 0,00422749 | 0,00103218 | FALSE |
| Rv3643  | 1   | 0   | NA           | NA           | NA           | NA       | NA         | NA         | FALSE |
| Rv3644c | 104 | 85  | 0,291048782  | -0,199090658 | -0,953105358 | 0,340537 | 0,41478346 | 0,10135485 | FALSE |
| Rv3647c | 19  | 9   | 1,078002512  | 0,587863072  | 1,049446782  | 0,293973 | 0,36443262 | 0,08902305 | FALSE |
| Rv3648c | 125 | 64  | 0,965784285  | 0,475644845  | 2,220904538  | 0,026357 | 0,04333716 | 0,0105897  | FALSE |
| Rv3649  | 17  | 24  | -0,497499659 | -0,9876391   | -2,191301831 | 0,02843  | 0,0464709  | 0,01135545 | FALSE |
| Rv3650  | 7   | 1   | 2,807354922  | 2,317215482  | 1,860676038  | 0,06279  | 0,09498149 | 0,02317788 | FALSE |
| Rv3652  | 5   | 3   | 0,736965594  | 0,246826154  | 0,239797393  | 0,810487 | 0,84737698 | 0,20689551 | FALSE |
| Rv3653  | 4   | 0   | NA           | NA           | NA           | NA       | NA         | NA         | FALSE |
| Rv3654c | 0   | 5   | -3,321928095 | -3,812067535 | -2,366327617 | 0,017966 | 0,03101478 | 0,00756437 | FALSE |
| Rv3655c | 2   | 5   | -1,321928095 | -1,812067535 | -1,59075933  | 0,111664 | 0,15738926 | 0,03837283 | FALSE |
| Rv3656c | 9   | 11  | -0,289506617 | -0,779646057 | -1,21405926  | 0,224725 | 0,28933449 | 0,07065404 | FALSE |
| Rv3657c | 2   | 2   | 0            | -0,49013944  | -0,342187506 | 0,73221  | 0,79149598 | 0,19316621 | FALSE |
| Rv3658c | 10  | 11  | -0,137503524 | -0,627642964 | -1,003447635 | 0,315645 | 0,38766896 | 0,09471436 | FALSE |
| Rv3659c | 7   | 1   | 2,807354922  | 2,317215482  | 1,860676038  | 0,06279  | 0,09498149 | 0,02317788 | FALSE |
| Rv3660c | 32  | 29  | 0,142019005  | -0,348120435 | -0,948551011 | 0,342849 | 0,41681987 | 0,10185246 | FALSE |

|         |     |     |              |              |              |          |            |            |       |
|---------|-----|-----|--------------|--------------|--------------|----------|------------|------------|-------|
| Rv3661  | 31  | 10  | 1,632268215  | 1,142128775  | 2,365881815  | 0,017987 | 0,03098366 | 0,00756437 | FALSE |
| Rv3662c | 13  | 11  | 0,2410081    | -0,249131341 | -0,425301594 | 0,670617 | 0,73913597 | 0,18061234 | FALSE |
| Rv3663c | 44  | 28  | 0,652076697  | 0,161937257  | 0,47363744   | 0,635758 | 0,70710249 | 0,17278477 | FALSE |
| Rv3664c | 6   | 5   | 0,263034406  | -0,227105034 | -0,262384616 | 0,793025 | 0,83979996 | 0,20496008 | FALSE |
| Rv3665c | 15  | 11  | 0,447458977  | -0,042680463 | -0,075515343 | 0,939805 | 0,953602   | 0,23292763 | FALSE |
| Rv3666c | 47  | 50  | -0,089267338 | -0,579406778 | -1,991608667 | 0,046414 | 0,07208062 | 0,01760983 | FALSE |
| Rv3667  | 56  | 44  | 0,347923303  | -0,142216137 | -0,494667209 | 0,620835 | 0,69505759 | 0,16984153 | FALSE |
| Rv3669  | 15  | 11  | 0,447458977  | -0,042680463 | -0,075515343 | 0,939805 | 0,953602   | 0,23292763 | FALSE |
| Rv3676  | 84  | 38  | 1,144389909  | 0,654250469  | 2,427824955  | 0,01519  | 0,02656322 | 0,00649088 | FALSE |
| Rv3678A | 15  | 7   | 1,099535674  | 0,609396234  | 0,963010104  | 0,335542 | 0,40946665 | 0,09996325 | FALSE |
| Rv3678c | 44  | 47  | -0,095157233 | -0,585296673 | -1,948568204 | 0,051347 | 0,0793785  | 0,01939662 | FALSE |
| Rv3681c | 103 | 101 | 0,028289044  | -0,461850396 | -2,302883909 | 0,021285 | 0,03587371 | 0,00876596 | FALSE |
| Rv3688c | 30  | 10  | 1,584962501  | 1,094823061  | 2,2493739    | 0,024489 | 0,04062381 | 0,00992246 | FALSE |
| Rv3689  | 46  | 27  | 0,768674454  | 0,278535014  | 0,81631324   | 0,414321 | 0,48828234 | 0,11929674 | FALSE |
| Rv3690  | 17  | 2   | 3,087462841  | 2,597323401  | 3,096187362  | 0,00196  | 0,00411108 | 0,00100457 | FALSE |
| Rv3691  | 17  | 15  | 0,180572246  | -0,309567194 | -0,610698257 | 0,541399 | 0,6177252  | 0,15087876 | FALSE |
| Rv3692  | 19  | 5   | 1,925999419  | 1,435859979  | 2,212974896  | 0,026899 | 0,04416316 | 0,01078927 | FALSE |
| Rv3693  | 6   | 3   | 1            | 0,50986056   | 0,518442029  | 0,60415  | 0,67939679 | 0,16589528 | FALSE |
| Rv3696c | 50  | 32  | 0,64385619   | 0,15371675   | 0,479954742  | 0,63126  | 0,7032003  | 0,17180674 | FALSE |
| Rv3697c | 35  | 12  | 1,544320516  | 1,054181076  | 2,355952752  | 0,018475 | 0,03162907 | 0,00772537 | FALSE |
| Rv3698  | 24  | 26  | -0,115477217 | -0,605616657 | -1,494291448 | 0,135099 | 0,18727845 | 0,04576262 | FALSE |
| Rv3700c | 14  | 19  | -0,440572591 | -0,930712031 | -1,855549811 | 0,063518 | 0,09573015 | 0,02339224 | FALSE |
| Rv3701c | 83  | 45  | 0,883186335  | 0,393046895  | 1,516970063  | 0,129274 | 0,18003421 | 0,04399245 | FALSE |
| Rv3702c | 3   | 5   | -0,736965594 | -1,227105034 | -1,192161297 | 0,233198 | 0,29881484 | 0,07298129 | FALSE |
| Rv3705c | 37  | 15  | 1,30256277   | 0,81242333   | 1,946687547  | 0,051572 | 0,07969508 | 0,01945745 | FALSE |
| Rv3706c | 4   | 5   | -0,321928095 | -0,812067535 | -0,847774643 | 0,396563 | 0,47241624 | 0,11533221 | FALSE |
| Rv3707c | 32  | 7   | 2,192645078  | 1,702505638  | 3,251522404  | 0,001148 | 0,00249235 | 0,00060885 | FALSE |
| Rv3712  | 2   | 8   | -2           | -2,49013944  | -2,45857915  | 0,013949 | 0,02454713 | 0,00599824 | FALSE |
| Rv3713  | 6   | 3   | 1            | 0,50986056   | 0,518442029  | 0,60415  | 0,67939679 | 0,16589528 | FALSE |
| Rv3714c | 4   | 3   | 0,415037499  | -0,075101941 | -0,069004391 | 0,944986 | 0,95612665 | 0,23342365 | FALSE |
| Rv3715c | 18  | 13  | 0,469485283  | -0,020654157 | -0,039879324 | 0,968189 | 0,97518167 | 0,23823009 | FALSE |
| Rv3716c | 32  | 7   | 2,192645078  | 1,702505638  | 3,251522404  | 0,001148 | 0,00249235 | 0,00060885 | FALSE |
| Rv3718c | 14  | 6   | 1,222392421  | 0,732252981  | 1,094369965  | 0,273793 | 0,34539192 | 0,08427609 | FALSE |
| Rv3719  | 133 | 69  | 0,946757979  | 0,456618539  | 2,206513562  | 0,027348 | 0,04483383 | 0,01095542 | FALSE |
| Rv3721c | 93  | 61  | 0,608421474  | 0,118282034  | 0,506803136  | 0,612293 | 0,68667547 | 0,1677933  | FALSE |
| Rv3724A | 25  | 15  | 0,736965594  | 0,246826154  | 0,536213136  | 0,591811 | 0,66744345 | 0,1630703  | FALSE |
| Rv3726  | 49  | 51  | -0,057715498 | -0,547854938 | -1,912323647 | 0,055835 | 0,08560443 | 0,02090413 | FALSE |

|         |     |    |              |              |              |          |            |            |       |
|---------|-----|----|--------------|--------------|--------------|----------|------------|------------|-------|
| Rv3727  | 28  | 6  | 2,222392421  | 1,732252981  | 3,078745508  | 0,002079 | 0,00433974 | 0,00106016 | FALSE |
| Rv3729  | 19  | 14 | 0,440572591  | -0,049566849 | -0,098820853 | 0,921281 | 0,93785203 | 0,22911009 | FALSE |
| Rv3730c | 28  | 7  | 2            | 1,50986056   | 2,788923152  | 0,005288 | 0,01018045 | 0,00248704 | FALSE |
| Rv3732  | 33  | 10 | 1,722466024  | 1,232326584  | 2,592938044  | 0,009516 | 0,01734015 | 0,00423717 | FALSE |
| Rv3734c | 132 | 98 | 0,429684275  | -0,060455165 | -0,31832485  | 0,750239 | 0,80353305 | 0,19634816 | FALSE |
| Rv3738c | 8   | 9  | -0,169925001 | -0,660064441 | -0,949188147 | 0,342525 | 0,41688011 | 0,10181958 | FALSE |
| Rv3739c | 5   | 4  | 0,321928095  | -0,168211345 | -0,175607701 | 0,860602 | 0,88718358 | 0,2165029  | FALSE |
| Rv3741c | 15  | 3  | 2,321928095  | 1,831788655  | 2,342126898  | 0,019174 | 0,03259697 | 0,00795239 | FALSE |
| Rv3742c | 18  | 2  | 3,169925001  | 2,679785561  | 3,240464224  | 0,001193 | 0,00258246 | 0,00063051 | FALSE |
| Rv3744  | 11  | 10 | 0,137503524  | -0,352635916 | -0,563778607 | 0,572905 | 0,64921454 | 0,15859348 | FALSE |
| Rv3745c | 5   | 3  | 0,736965594  | 0,246826154  | 0,239797393  | 0,810487 | 0,84737698 | 0,20689551 | FALSE |
| Rv3747  | 10  | 7  | 0,514573173  | 0,024433733  | 0,03488969   | 0,972168 | 0,97780164 | 0,23883947 | FALSE |
| Rv3748  | 13  | 3  | 2,115477217  | 1,625337777  | 2,005125088  | 0,04495  | 0,06987599 | 0,01706783 | FALSE |
| Rv3752c | 13  | 5  | 1,378511623  | 0,888372183  | 1,245248184  | 0,213041 | 0,27795633 | 0,0678523  | FALSE |
| Rv3753c | 56  | 19 | 1,559427409  | 1,069287969  | 3,014917126  | 0,00257  | 0,00529978 | 0,00129503 | FALSE |
| Rv3754  | 6   | 7  | -0,222392421 | -0,712531861 | -0,895464602 | 0,370539 | 0,44617759 | 0,108959   | FALSE |
| Rv3755c | 44  | 14 | 1,652076697  | 1,161937257  | 2,85771638   | 0,004267 | 0,00840489 | 0,00205242 | FALSE |
| Rv3756c | 14  | 12 | 0,222392421  | -0,267747019 | -0,475868675 | 0,634168 | 0,70573548 | 0,1724016  | FALSE |
| Rv3758c | 14  | 23 | -0,716207034 | -1,206346474 | -2,522747301 | 0,011644 | 0,02092527 | 0,00511322 | FALSE |
| Rv3759c | 38  | 10 | 1,925999419  | 1,435859979  | 3,129655336  | 0,00175  | 0,00369416 | 0,00090269 | FALSE |
| Rv3760  | 16  | 2  | 3            | 2,50986056   | 2,946920872  | 0,00321  | 0,00647214 | 0,00157947 | FALSE |
| Rv3761c | 38  | 36 | 0,078002512  | -0,412136928 | -1,237401386 | 0,215938 | 0,28126694 | 0,06859646 | FALSE |
| Rv3766  | 32  | 38 | -0,247927513 | -0,738066953 | -2,151669716 | 0,031423 | 0,05097976 | 0,01245721 | FALSE |
| Rv3770B | 23  | 6  | 1,938599455  | 1,448460015  | 2,45081658   | 0,014253 | 0,02506032 | 0,00612271 | FALSE |
| Rv3770c | 15  | 3  | 2,321928095  | 1,831788655  | 2,342126898  | 0,019174 | 0,03259697 | 0,00795239 | FALSE |
| Rv3771c | 10  | 6  | 0,736965594  | 0,246826154  | 0,339126285  | 0,734515 | 0,79124952 | 0,19318673 | FALSE |
| Rv3772  | 3   | 4  | -0,415037499 | -0,905176939 | -0,831685343 | 0,405587 | 0,48052657 | 0,11734837 | FALSE |
| Rv3773c | 22  | 6  | 1,874469118  | 1,384329678  | 2,316420535  | 0,020535 | 0,03469194 | 0,00847169 | FALSE |
| Rv3775  | 18  | 4  | 2,169925001  | 1,679785561  | 2,415571032  | 0,015711 | 0,02738216 | 0,00668354 | FALSE |
| Rv3777  | 28  | 10 | 1,485426827  | 0,995287387  | 2,009903039  | 0,044441 | 0,06919612 | 0,01690849 | FALSE |
| Rv3778c | 86  | 95 | -0,143590854 | -0,633730294 | -2,974644499 | 0,002933 | 0,00595656 | 0,00145552 | FALSE |
| Rv3782  | 108 | 73 | 0,565062943  | 0,074923503  | 0,348561162  | 0,727419 | 0,78795295 | 0,19254107 | FALSE |
| Rv3784  | 81  | 77 | 0,073063462  | -0,417075978 | -1,829904031 | 0,067264 | 0,10094814 | 0,02466729 | FALSE |
| Rv3786c | 17  | 3  | 2,502500341  | 2,0123609    | 2,654792404  | 0,007936 | 0,01474613 | 0,00359903 | FALSE |
| Rv3787c | 10  | 6  | 0,736965594  | 0,246826154  | 0,339126285  | 0,734515 | 0,79124952 | 0,19318673 | FALSE |
| Rv3788  | 27  | 19 | 0,506959989  | 0,016820549  | 0,039519337  | 0,968476 | 0,9749678  | 0,23823928 | FALSE |
| Rv3789  | 16  | 2  | 3            | 2,50986056   | 2,946920872  | 0,00321  | 0,00647214 | 0,00157947 | FALSE |





|         |     |     |              |              |              |          |            |            |       |
|---------|-----|-----|--------------|--------------|--------------|----------|------------|------------|-------|
| Rv3850  | 18  | 22  | -0,289506617 | -0,779646057 | -1,716959358 | 0,085987 | 0,12473167 | 0,03047479 | FALSE |
| Rv3851  | 3   | 1   | 1,584962501  | 1,094823061  | 0,711301316  | 0,476898 | 0,55277082 | 0,13487273 | FALSE |
| Rv3853  | 5   | 4   | 0,321928095  | -0,168211345 | -0,175607701 | 0,860602 | 0,88718358 | 0,2165029  | FALSE |
| Rv3856c | 38  | 15  | 1,341036918  | 0,850897478  | 2,052516854  | 0,040119 | 0,06354349 | 0,01552409 | FALSE |
| Rv3857c | 8   | 3   | 1,415037499  | 0,924898059  | 1,01059623   | 0,31221  | 0,38484184 | 0,09391985 | FALSE |
| Rv3859c | 908 | 700 | 0,375337375  | -0,114802065 | -1,60171662  | 0,109218 | 0,15424861 | 0,03769158 | FALSE |
| Rv3860  | 27  | 12  | 1,169925001  | 0,679785561  | 1,423790007  | 0,154507 | 0,20975174 | 0,0512452  | FALSE |
| Rv3861  | 2   | 0   | NA           | NA           | NA           | NA       | NA         | NA         | FALSE |
| Rv3869  | 421 | 370 | 0,186294963  | -0,303844477 | -2,981291268 | 0,00287  | 0,00583789 | 0,00142652 | FALSE |
| Rv3870  | 659 | 464 | 0,50615366   | 0,01601422   | 0,186024638  | 0,852425 | 0,88341862 | 0,21586868 | FALSE |
| Rv3879c | 383 | 298 | 0,362032061  | -0,128107379 | -1,162868673 | 0,244883 | 0,31250565 | 0,07636265 | FALSE |
| Rv3882c | 44  | 41  | 0,101879614  | -0,388259826 | -1,249199964 | 0,211592 | 0,27662087 | 0,06759398 | FALSE |
| Rv3883c | 47  | 46  | 0,031026896  | -0,459112544 | -1,545558796 | 0,122211 | 0,17086809 | 0,04175265 | FALSE |
| Rv3884c | 36  | 24  | 0,584962501  | 0,094823061  | 0,253796736  | 0,799653 | 0,84464252 | 0,20639351 | FALSE |
| Rv3885c | 16  | 10  | 0,678071905  | 0,187932465  | 0,329964181  | 0,741427 | 0,79551382 | 0,19430853 | FALSE |
| Rv3886c | 9   | 5   | 0,847996907  | 0,357857467  | 0,457556932  | 0,647271 | 0,71694581 | 0,1750659  | FALSE |
| Rv3887c | 55  | 17  | 1,693896872  | 1,203757432  | 3,286140464  | 0,001016 | 0,00222452 | 0,00054358 | FALSE |
| Rv3890c | 103 | 114 | -0,146389487 | -0,636528927 | -3,271432947 | 0,00107  | 0,00233828 | 0,00057137 | FALSE |
| Rv3891c | 15  | 9   | 0,736965594  | 0,246826154  | 0,415345089  | 0,677889 | 0,7419164  | 0,1811902  | FALSE |
| Rv3893c | 7   | 1   | 2,807354922  | 2,317215482  | 1,860676038  | 0,06279  | 0,09498149 | 0,02317788 | FALSE |
| Rv3896c | 51  | 24  | 1,087462841  | 0,597323401  | 1,744220538  | 0,081121 | 0,11846526 | 0,0289477  | FALSE |
| Rv3897c | 8   | 4   | 1            | 0,50986056   | 0,598646295  | 0,549409 | 0,62576674 | 0,15284302 | FALSE |
| Rv3901c | 12  | 10  | 0,263034406  | -0,227105034 | -0,371070296 | 0,710585 | 0,77336541 | 0,18897652 | FALSE |
| Rv3902c | 61  | 53  | 0,202816883  | -0,287322557 | -1,069618592 | 0,284791 | 0,35724669 | 0,08729539 | FALSE |
| Rv3903c | 106 | 70  | 0,598637438  | 0,108497998  | 0,497159332  | 0,619077 | 0,69368565 | 0,16950629 | FALSE |
| Rv3904c | 13  | 5   | 1,378511623  | 0,888372183  | 1,245248184  | 0,213041 | 0,27795633 | 0,0678523  | FALSE |
| Rv3906c | 18  | 21  | -0,222392421 | -0,712531861 | -1,551014059 | 0,120898 | 0,1695181  | 0,04141584 | FALSE |
| Rv3908  | 11  | 10  | 0,137503524  | -0,352635916 | -0,563778607 | 0,572905 | 0,64921454 | 0,15859348 | FALSE |
| Rv3910  | 131 | 132 | -0,010971118 | -0,501110558 | -2,837207867 | 0,004551 | 0,00889472 | 0,00217348 | FALSE |
| Rv3911  | 5   | 3   | 0,736965594  | 0,246826154  | 0,239797393  | 0,810487 | 0,84737698 | 0,20689551 | FALSE |
| Rv3912  | 4   | 1   | 2            | 1,50986056   | 1,054098848  | 0,291838 | 0,3631117  | 0,08848889 | FALSE |
| Rv3917c | 124 | 55  | 1,172836597  | 0,682697157  | 3,062987683  | 0,002191 | 0,0045615  | 0,00111463 | FALSE |
| Rv3919c | 105 | 50  | 1,070389328  | 0,580249888  | 2,438488604  | 0,014749 | 0,02583277 | 0,00631098 | FALSE |
| Rv3920c | 141 | 120 | 0,232660757  | -0,257478683 | -1,449896265 | 0,147087 | 0,20139428 | 0,04921191 | FALSE |
| Rv3922c | 65  | 30  | 1,115477217  | 0,625337777  | 2,051514363  | 0,040217 | 0,06365907 | 0,01555548 | FALSE |

**(1) Benjamini Y & Hochberg Y.** "Controlling the false discovery rate: a practical and powerful approach to multiple testing". J. R. Stat. Soc. Ser. B 1995;57:289-300

**(2) Storey JD & Tibshirani R.** "Statistical significance for genomewide studies" Proc Natl Acad Sci U S A. 2003; 100(16):9440-5.

**Table S1E. Significant over expressed genes in the fatty acid during exponential phase (FE versus DE)**

| Gene    | Gene name | Functional Category                        | FDR Fisher Exact Test | Function                                                                                                                                                                        |
|---------|-----------|--------------------------------------------|-----------------------|---------------------------------------------------------------------------------------------------------------------------------------------------------------------------------|
| Rv0079  |           | conserved hypotheticals                    | 1,08988E-12           | Unknown, probalby transduction regulation protein<br>PROBABLE TRANSCRIPTIONAL REGULATORY PROTEIN (POSSIBLY TETR-                                                                |
| Rv0144  |           | regulatory proteins                        | 0,001591085           | FAMILY)                                                                                                                                                                         |
| Rv0145  |           | lipid metabolism                           | 5,22816E-05           | POSSIBLE METHYLTRANSFERASE                                                                                                                                                      |
| Rv0190  |           | conserved hypotheticals                    | 7,37511E-10           | Unknown                                                                                                                                                                         |
| Rv0211  | pckA      | intermediary metabolism<br>and respiration | 0,020878301           | RATE-LIMITING GLUCONEOGENIC ENZYME [CATALYTIC ACTIVITY: GTP +<br>OXALOACETATE = GDP + PHOSPHOENOLPYRUVATE + CO2].                                                               |
| Rv0250c |           | conserved hypotheticals                    | 7,54408E-05           | Unknown                                                                                                                                                                         |
| Rv0291  | mycP3     | intermediary metabolism<br>and respiration | 0,000574297           | THOUGHT TO HAVE PROTEOLYTIC ACTIVITY.<br>INVOLVED IN GLYOXYLATE BYPASS (AT THE FIRST STEP), AN<br>ALTERNATIVE TO THE TRICARBOXYLIC ACID CYCLE; [CATALYTIC                       |
| Rv0467  | icl1      | intermediary metabolism<br>and respiration | 1,57666E-08           | ACTIVITY: ISOCITRATE = SUCCINATE + GLYOXYLATE]<br>POSSIBLY INVOLVED IN TRANSCRIPTIONAL MECHANISM; POSSIBLE                                                                      |
| Rv0485  |           | regulatory proteins                        | 0,004191599           | TRANSCRIPTIONAL REGULATORY PROTEIN                                                                                                                                              |
| Rv0508  |           | conserved hypotheticals                    | 8,01608E-07           | Unknown                                                                                                                                                                         |
| Rv0509  | hemA      | intermediary metabolism<br>and respiration | 6,15535E-12           | INVOLVED IN PORPHYRIN BIOSYNTHESIS BY THE C5 PATHWAY (AT THE<br>FIRST STEP) [CATALYTIC ACTIVITY: GLUTAMYL-TRNA(GLU) + NADPH =<br>GLUTAMATE-1-SEMIALDEHYDE + NADP+ + TRNA(GLU)]. |
| Rv0512  | hemB      | intermediary metabolism<br>and respiration | 0,020473912           | INVOLVED IN PORPHYRIN AND HEME BIOSYNTHESIS; [CATALYTIC<br>ACTIVITY: 2 5-AMINOLEVULINATE = PORPHOBILINOGEN + 2 H2O].                                                            |
| Rv0516c |           | information pathways                       | 0,020987415           | POSSIBLE ANTI-ANTI-SIGMA FACTOR                                                                                                                                                 |
| Rv0629c | recD      | information pathways                       | 0,028599179           | INVOLVED IN HOMOLOGOUS RECOMBINATION.                                                                                                                                           |
| Rv0682  | rpsL      | information pathways                       | 1,08988E-12           | PROTEIN S12 IS INVOLVED IN THE TRANSLATION INITIATION STEP<br>PROTEIN S7 BINDS SPECIFICALLY TO PART OF THE 3' END OF 16S                                                        |
| Rv0683  | rpsG      | information pathways                       | 0,028789283           | RIBOSOMAL RNA                                                                                                                                                                   |
| Rv0692  |           | conserved hypotheticals                    | 1,08988E-12           | Unknown                                                                                                                                                                         |

|         |       |                                         |             |                                                                                                                                                                                                           |
|---------|-------|-----------------------------------------|-------------|-----------------------------------------------------------------------------------------------------------------------------------------------------------------------------------------------------------|
| Rv0693  | pqqE  | intermediary metabolism and respiration | 1,08988E-12 | REQUIRED FOR COENZYME PYRROLO-QUINOLINE-QUINONE (PQQ) BIOSYNTHESIS.                                                                                                                                       |
| Rv0694  | lldD1 | intermediary metabolism and respiration | 0,028789283 | INTO PYRUVATE [CATALYTIC ACTIVITY: (S)-LACTATE + 2 FERRICYTOCHROME C = PYRUVATE + 2 FERROCYTOCHROME C].                                                                                                   |
| Rv0696  |       | intermediary metabolism and respiration | 3,20971E-06 | Unknown, PROBABLY INVOLVED IN CELLULAR METABOLISM; PROBABLE                                                                                                                                               |
| Rv0697  |       | intermediary metabolism and respiration | 0,001144501 | MEMBRANE SUGAR TRANSFERASE<br>Unknown, PROBABLY INVOLVED IN CELLULAR METABOLISM.PROBABLE                                                                                                                  |
| Rv0716  | rplE  | information pathways                    | 0,018883796 | DEHYDROGENASE<br>THIS IS ONE OF 3 PROTEINS THAT MEDIATE THE ATTACHMENT OF THE 5S RNA INTO THE LARGE RIBOSOMAL SUBUNIT.                                                                                    |
| Rv0808  | purF  | intermediary metabolism and respiration | 0,000246399 | INVOLVED IN DE NOVO PURINE BIOSYNTHESIS (AT THE FIRST STEP) [CATALYTIC ACTIVITY: 5-PHOSPHO-BETA-D-RIBOSYLAMINE + DIPHOSPHATE + L-GLUTAMATE = L-GLUTAMINE + 5-PHOSPHO-ALPHA-D-RIBOSE 1-DIPHOSPHATE + H2O]. |
| Rv0809  | purM  | intermediary metabolism and respiration | 0,009207914 | INVOLVED IN DE NOVO PURINE BIOSYNTHESIS (AT THE FIFTH STEP) [CATALYTIC ACTIVITY: ATP + 5'-PHOSPHORIBOSYLFORMYLGLYCINAMIDINE = ADP + PHOSPHATE + 5'-PHOSPHORIBOSYL-5-AMINOIMIDAZOLE].                      |
| Rv0866  | moaE2 | intermediary metabolism and respiration | 1,03905E-05 | POSSIBLY A MOLYBDENUM BIOSYNTHESIS COFACTOR. CONVERSION OF MOLYBDOPTERIN PRECURSOR Z INTO MOLYBDOPTERIN REQUIRES                                                                                          |
| Rv0870c |       | cell wall and cell processes            | 0,001141502 | TRANSFER OF TWO SULFUR ATOMS TO PRECURSOR Z<br>Unknown, POSSIBLE CONSERVED INTEGRAL MEMBRANE PROTEIN                                                                                                      |
| Rv0981  | mprA  | regulatory proteins                     | 0,00887793  | REGULATOR PART OF A TWO COMPONENT REGULATORY SYSTEM (MPRAB SYSTEM); MYCOBACTERIAL PERSISTENCE REGULATOR MRPA (TWO COMPONENT RESPONSE TRANSCRIPTIONAL REGULATORY PROTEIN)                                  |
| Rv0995  | rimJ  | information pathways                    | 0,002860412 | ACETYLATES THE N-TERMINAL ALANINE OF RIBOSOMAL PROTEIN S5 [CATALYTIC ACTIVITY: ACETYL-CoA + RIBOSOMAL-PROTEIN L-ALANINE = CoA + RIBOSOMAL-PROTEIN N-ACETYL-L-ALANINE].                                    |
| Rv1057  |       | conserved hypotheticals                 | 0,002210585 | Unknown                                                                                                                                                                                                   |
| Rv1066  |       | conserved hypotheticals                 | 1,28318E-07 | Unknown                                                                                                                                                                                                   |
| Rv1110  | lytB2 | cell wall and cell processes            | 9,75566E-10 | UNKNOWN. IN OTHER ORGANISMS, LYTB PRODUCT IS INVOLVED IN PENICILLIN TOLERANCE AND CONTROL OF THE STRINGENT RESPONSE.                                                                                      |

|         |        |                                         |             |                                                                                                                                                                                                                                                                                                                                                |
|---------|--------|-----------------------------------------|-------------|------------------------------------------------------------------------------------------------------------------------------------------------------------------------------------------------------------------------------------------------------------------------------------------------------------------------------------------------|
| Rv1174c | TB8.4  | cell wall and cell processes            | 7,34397E-06 | Unknown, (SECRETED PROTEIN)                                                                                                                                                                                                                                                                                                                    |
| Rv1180  | pkc3   | lipid metabolism                        | 0,000588572 | PROBABLE POLYKETIDE BETA-KETOACYL SYNTHASE PKC3                                                                                                                                                                                                                                                                                                |
| Rv1184c |        | cell wall and cell processes            | 3,69208E-07 | Unknown, POSSIBLE EXPORTED PROTEIN; Lipase, esterase or quitinase INVOLVED IN BIOSYNTHESIS OF DIAMINOPIMELATE AND LYSINE; [CATALYTIC ACTIVITY: TETRAHYDRODIPICOLINATE + SUCCINYL-CoA +                                                                                                                                                         |
| Rv1201c | dapD   | intermediary metabolism and respiration | 1,65011E-05 | H <sub>2</sub> O = N-SUCCINYL-2-AMINO-6-KETOPIMELATE + COENZYME A] PRODUCES ATP FROM ADP IN THE PRESENCE OF A PROTON GRADIENT ACROSS THE MEMBRANE. THE GAMMA CHAIN IS BELIEVED TO BE IMPORTANT IN REGULATING ATPase ACTIVITY AND THE FLOW OF                                                                                                   |
| Rv1309  | atpG   | intermediary metabolism and respiration | 0,009167849 | PROTONS THROUGH THE CF(0) COMPLEX. PRODUCES ATP FROM ADP IN THE PRESENCE OF A PROTON GRADIENT ACROSS THE MEMBRANE; [CATALYTIC ACTIVITY: ATP + H(2)O +                                                                                                                                                                                          |
| Rv1310  | atpD   | intermediary metabolism and respiration | 3,85328E-06 | H(+)(IN) = ADP + PHOSPHATE + H(+)(OUT)] PRODUCES ATP FROM ADP IN THE PRESENCE OF A PROTON GRADIENT ACROSS THE MEMBRANE [CATALYTIC ACTIVITY: ATP + H(2)O +                                                                                                                                                                                      |
| Rv1311  | atpC   | intermediary metabolism and respiration | 1,08988E-12 | H(+)(IN) = ADP + PHOSPHATE + H(+)(OUT)] INVOLVED IN THE ACTIVATED METHYL CYCLE; [CATALYTIC ACTIVITY : ATP + L-METHIONINE + H(2)O = PHOSPHATE + DIPHOSPHATE + S-                                                                                                                                                                                |
| Rv1392  | metK   | intermediary metabolism and respiration | 0,016122276 | ADENOSYL-L-METHIONINE]                                                                                                                                                                                                                                                                                                                         |
| Rv1397c | vapC10 | virulence, detoxification, adaptation   | 0,032143395 | Unknown, POSSIBLE TOXIN VAPC10                                                                                                                                                                                                                                                                                                                 |
| Rv1398c | vapB10 | virulence, detoxification, adaptation   | 1,08988E-12 | Unknown, POSSIBLE ANTITOXIN VAPB10                                                                                                                                                                                                                                                                                                             |
| Rv1436  | gap    | intermediary metabolism and respiration | 0,028210956 | INVOLVED IN SECOND PHASE OF GLYCOLYSIS (FIRST STEP) [CATALYTIC ACTIVITY: D-GLYCERALDEHYDE 3-PHOSPHATE + PHOSPHATE + NAD(+) = 3-PHOSPHO-D-GLYCEROYL PHOSPHATE + NADH.] TRANSALDOLASE IS IMPORTANT FOR THE BALANCE OF METABOLITES IN THE PENTOSE-PHOSPHATE PATHWAY [CATALYTIC ACTIVITY: SEDOHEPTULOSE 7-PHOSPHATE + D-GLYCERALDEHYDE 3-PHOSPHATE |
| Rv1448c | tal    | intermediary metabolism and respiration | 0,003114912 | = D-ERYTHROSE 4-PHOSPHATE + D-FRUCTOSE 6-PHOSPHATE]                                                                                                                                                                                                                                                                                            |
| Rv1462  |        | conserved hypotheticals                 | 0,034289899 | Unknown                                                                                                                                                                                                                                                                                                                                        |

|         |       |                              |                                                                        |
|---------|-------|------------------------------|------------------------------------------------------------------------|
| Rv1489  |       | conserved hypotheticals      | 0,02538925 Unknown                                                     |
| Rv1610  |       | cell wall and cell processes | 0,023157422 Unknown, POSSIBLE CONSERVED INTEGRAL MEMBRANE PROTEIN      |
| Rv1628c |       | conserved hypotheticals      | 0,001273772 Unknown                                                    |
| Rv1638A |       | conserved hypotheticals      | 0,000396176 Unknown                                                    |
|         |       |                              | NUDIX HYDROLASES CATALYZE THE HYDROLYSIS OF A VARIETY OF               |
| Rv1700  |       | information pathways         | 0,001797326 NUCLEOSIDE DIPHOSPHATE DERIVATIVES                         |
| Rv1733c |       | cell wall and cell processes | 2,6153E-08 Unknown, PROBABLE CONSERVED TRANSMEMBRANE PROTEIN           |
| Rv1772  |       | conserved hypotheticals      | 0,000115402 Unknown                                                    |
| Rv1813c |       | conserved hypotheticals      | 1,08988E-12 Unknown                                                    |
| Rv1870c |       | conserved hypotheticals      | 0,004833326 Unknown                                                    |
| Rv1904  |       | conserved hypotheticals      | 2,14472E-05 Unknown                                                    |
|         |       | virulence, detoxification,   | MULTIFUNCTIONAL ENZYME, EXHIBITING BOTH A CATALASE, A BROAD-           |
| Rv1908c | katG  | adaptation                   | 0,004337147 SPECTRUM PEROXIDASE, AND A PEROXYNITRITASE ACTIVITIES      |
| Rv1927  |       | conserved hypotheticals      | 0,002897917 Unknown                                                    |
|         |       | virulence, detoxification,   |                                                                        |
| Rv1932  | tpx   | adaptation                   | 0,0116419 HAS ANTIOXIDANT ACTIVITY. COULD REMOVE PEROXIDES OR H(2)O(2) |
| Rv1947  |       | conserved hypotheticals      | 2,4711E-09 Unknown                                                     |
| Rv1996  |       | virulence, detoxification,   |                                                                        |
|         |       | adaptation                   | 1,08988E-12 Unknown, UNIVERSAL STRESS PROTEIN FAMILY PROTEIN           |
| Rv2052c |       | conserved hypotheticals      | 0,019506044 Unknown                                                    |
| Rv2092c | helY  | information pathways         | 0,00059448 DNA HELICASE ACTIVITY.                                      |
| Rv2159c |       | conserved hypotheticals      | 0,001273258 Unknown                                                    |
| Rv2160A |       | regulatory proteins          | 1,08988E-12 transcriptional regulator                                  |
|         |       | intermediary metabolism      | Unknown, CONSERVED PROTEIN; shows some similarity to protein           |
| Rv2161c |       | and respiration              | 3,02844E-06 involved in lincomycin production                          |
| Rv2204c |       | conserved hypotheticals      | 2,53008E-13 Unknown                                                    |
|         |       | intermediary metabolism      | INVOLVED IN GLUTAMINE BIOSYNTHESIS [CATALYTIC ACTIVITY: ATP +          |
| Rv2220  | glnA1 | and respiration              | 0,000504747 L-GLUTAMATE + NH(3) = ADP + GLUTAMINE + ORTHOPHOSPHATE].   |
| Rv2258c |       | regulatory proteins          | 0,00887793 POSSIBLY INVOLVED IN TRANSCRIPTIONAL REGULATION             |
| Rv2342  |       | conserved hypotheticals      | 1,18582E-05 Unknown                                                    |
| Rv2382c | mbtC  | lipid metabolism             | 0,03222415 POLYKETIDE SYNTHETASE MBTC (POLYKETIDE SYNTHASE)            |
|         |       |                              | CATALYZES THE REDUCTION OF SULFITE TO SULFIDE, IN THE                  |
|         |       | intermediary metabolism      | BIOSYNTHESIS OF SULFUR-CONTAINING AMINO ACIDS AND CO-                  |
| Rv2391  | sirA  | and respiration              | 2,64378E-06 FACTORS; FERREDOXIN-DEPENDENT SULFITE REDUCTASE SIRA       |

|         |       |                                         |             |                                                                                                                                                                                                                                                                                                                                          |
|---------|-------|-----------------------------------------|-------------|------------------------------------------------------------------------------------------------------------------------------------------------------------------------------------------------------------------------------------------------------------------------------------------------------------------------------------------|
| Rv2392  | cysH  | intermediary metabolism and respiration | 8,89738E-06 | REDUCES ACTIVATED SULFATE INTO SULFITE [CATALYTIC ACTIVITY: 5-PHOSPHOADENOSINE 3-PHOSPHOSULFATE + REDUCED THIOREDOXIN = PHOSPHOADENOSINE PHOSPHATE + OXIDIZED THIOREDOXIN + SULFITE].                                                                                                                                                    |
| Rv2393  | che1  | intermediary metabolism and respiration | 5,98196E-11 | POSSIBLY INVOLVED IN INSERTING FE <sup>2+</sup> INTO SIROHYDROCHLORIN TO PRODUCE SIROHEME, REQUIRED FOR SIRA (Rv2391) FUNCTION PLAYS A KEY ROLE IN THE GAMMA-GLUTAMYL CYCLE, A PATHWAY FOR THE SYNTHESIS AND DEGRADATION OF GLUTATHIONE [CATALYTIC ACTIVITY: 5-L-GLUTAMYL)-PEPTIDE + AN AMINO ACID = PEPTIDE + 5-L-GLUTAMYL-AMINO ACID]. |
| Rv2394  | ggtB  | intermediary metabolism and respiration | 0,028599179 | INVOLVED IN PROLINE BIOSYNTHESIS PATHWAY; [CATALYTIC ACTIVITY: ATP + L-GLUTAMATE = ADP + L-GLUTAMATE 5- PHOSPHATE].                                                                                                                                                                                                                      |
| Rv2439c | proB  | intermediary metabolism and respiration | 0,001265082 | ESSENTIAL GTP-BINDING PROTEIN.                                                                                                                                                                                                                                                                                                           |
| Rv2440c | obg   | intermediary metabolism and respiration | 0,034950697 | Unknown                                                                                                                                                                                                                                                                                                                                  |
| Rv2542  |       | conserved hypotheticals                 | 0,001544712 | Unknown, THOUGHT TO BE INVOLVED IN THE PERSISTENCE IN THE                                                                                                                                                                                                                                                                                |
| Rv2557  |       | conserved hypotheticals                 | 9,52705E-13 | HOST                                                                                                                                                                                                                                                                                                                                     |
| Rv2558  |       | conserved hypotheticals                 | 0,001741085 | Unknown, THOUGHT TO BE INVOLVED IN THE PERSISTENCE IN THE                                                                                                                                                                                                                                                                                |
| Rv2590  | fadD9 | lipid metabolism                        | 5,68146E-07 | HOST<br>FUNCTION UNKNOWN, BUT INVOLVED IN LIPID DEGRADATION; PROBABLE FATTY-ACID-CoA LIGASE FADD9 (FATTY-ACID-CoA SYNTHETASE) (FATTY-ACID-CoA SYNTHASE)                                                                                                                                                                                  |
| Rv2781c |       | intermediary metabolism and respiration | 1,94249E-10 | Unknown, PROBABLY INVOLVED IN CELLULAR METABOLISM. POSSIBLE ALANINE RICH OXIDOREDUCTASE                                                                                                                                                                                                                                                  |
| Rv2792c |       | insertion seqs and phages               | 0,045951102 | PREVENTS THE COINTEGRATION OF FOREIGN DNA BEFORE INTEGRATION INTO THE CHROMOSOME.                                                                                                                                                                                                                                                        |
| Rv2793c | truB  | information pathways                    | 0,014028953 | FORMATION OF PSEUDOURIDINE AT POSITION 55 IN THE PSI GC LOOP OF TRANSFER RNAs [CATALYTIC ACTIVITY: URACIL + D-RIBOSE 5-PHOSPHATE = PSEUDOURIDINE 5'-PHOSPHATE + H <sub>2</sub> O].                                                                                                                                                       |
| Rv2794c | pptT  | lipid metabolism                        | 0,041089059 | BIOSYNTHESIS OF FATTY ACIDS AND LIPIDS                                                                                                                                                                                                                                                                                                   |

|         |       |                                         |             |                                                                                                                                                                    |
|---------|-------|-----------------------------------------|-------------|--------------------------------------------------------------------------------------------------------------------------------------------------------------------|
| Rv2902c | rnhB  | information pathways                    | 0,00193951  | DEGRADES THE RIBONUCLEOTIDE MOIETY ON RNA-DNA HYBRID MOLECULES [CATALYTIC ACTIVITY: ENDONUCLEOLYTIC CLEAVAGE TO 5'-PHOSPHOMONOESTER].                              |
| Rv2922A | acyP  | intermediary metabolism and respiration | 9,04757E-06 | INVOLVED IN CELLULAR METABOLISM [CATALYTIC ACTIVITY: AN ACYLPHOSPHATE + H(2)O = A FATTY ACID ANION + ORTHOPHOSPHATE].                                              |
| Rv3131  |       | conserved hypotheticals                 | 1,08988E-12 | Unknown                                                                                                                                                            |
| Rv3134c |       | virulence, detoxification, adaptation   | 5,98851E-06 | FUNCTION UNKNOWN. COULD PLAY A ROLE IN THE ADAPTATION TO HYPOXIA, part of dosR regulon                                                                             |
| Rv3145  | nuoA  | intermediary metabolism and respiration | 0,007665023 | INVOLVED IN AEROBIC ANAEROBIC RESPIRATION [CATALYTIC ACTIVITY: NADH + UBIQUINONE = NAD(+) + UBIQUINOL]. PROBABLE NADH DEHYDROGENASE I                              |
| Rv3229c | desA3 | lipid metabolism                        | 1,08988E-12 | THOUGHT TO BE INVOLVED IN LIPID METABOLISM [CATALYTIC ACTIVITY: LINOLEOYL-CoA + AH(2) + O(2) = GAMMA-LINOLENOYL-CoA + A + 2 H(2)O]                                 |
| Rv3230c |       | intermediary metabolism and respiration | 0,005698678 | Unknown; PROBABLY INVOLVED IN CELLULAR METABOLISM; HYPOTHETICAL OXIDOREDUCTASE                                                                                     |
| Rv3241c |       | information pathways                    | 0,000500956 | Unknown, MAY BE INVOLVED IN TRANSDUCTION MECHANISM                                                                                                                 |
| Rv3261  | fbiA  | intermediary metabolism and respiration | 0,015453196 | REQUIRED FOR COENZYME F420 PRODUCTION: INVOLVED IN THE CONVERSION OF FO INTO F420.                                                                                 |
| Rv3271c |       | cell wall and cell processes            | 0,020987415 | Unknown, PROBABLE CONSERVED INTEGRAL MEMBRANE PROTEIN                                                                                                              |
| Rv3288c | usfY  | conserved hypotheticals                 | 1,09818E-10 | Unknown; May not be contranscribed with the usfX and sigF proteins.                                                                                                |
| Rv3289c |       | cell wall and cell processes            | 1,08988E-12 | Unknown, POSSIBLE TRANSMEMBRANE PROTEIN                                                                                                                            |
| Rv3290c | lat   | intermediary metabolism and respiration | 1,08988E-12 | POSSIBLY INVOLVED IN L-ALPHA-AMINOADIPIC ACID (L-AAA) BIOSYNTHESIS; [CATALYTIC ACTIVITY: L-LYSINE + 2-OXOGLUTARATE = 2-AMINOADIPATE 6-SEMIALDEHYDE + L-GLUTAMATE]. |
| Rv3307  | deoD  | intermediary metabolism and respiration | 4,98361E-05 | INVOLVED IN PURINE NUCLEOSIDE SALVAGE; [CATALYTIC ACTIVITY: PURINE NUCLEOSIDE + ORTHOPHOSPHATE = PURINE + ALPHA-D-RIBOSE 1-PHOSPHATE].                             |
| Rv3312A |       | cell wall and cell processes            | 0,001144501 | Unknown, SECRETED PROTEIN ANTIGEN                                                                                                                                  |
| Rv3364c |       | conserved hypotheticals                 | 0,028599179 | Unknown                                                                                                                                                            |
| Rv3402c |       | conserved hypotheticals                 | 0,04819286  | FUNCTION UNKNOWN; THOUGHT TO BE INVOLVED IN CELL PROCESS                                                                                                           |



|         |       |                              |             |                                                                                                                                         |
|---------|-------|------------------------------|-------------|-----------------------------------------------------------------------------------------------------------------------------------------|
| Rv3416  | whiB3 | regulatory proteins          | 0,002932085 | INVOLVED IN TRANSCRIPTIONAL MECHANISM (GROWTH PHASE-DEPENDENT).                                                                         |
| Rv3487c | lipF  | intermediary metabolism      | 0,000396176 | FUNCTION UNKNOWN; LIPOLYTIC ENZYME INVOLVED IN CELLULAR                                                                                 |
| Rv3566A |       | and respiration              | 0,006747902 | METABOLISM                                                                                                                              |
| Rv3588c | canB  | conserved hypotheticals      | 2,42089E-05 | CATALYZES REVERSIBLE DEHYDRATION OF CO2 TO FORM BICARBONATE                                                                             |
| Rv3612c |       | intermediary metabolism      | 0,028599179 | Unknown                                                                                                                                 |
| Rv3613c | espD  | and respiration              | 1,05817E-07 | Unknown                                                                                                                                 |
| Rv3614c |       | conserved hypotheticals      | 1,08988E-12 | Unknown, ESX-1 SECRETION-ASSOCIATED PROTEIN ESPD                                                                                        |
| Rv3673c | pks2  | cell wall and cell processes | 0,028210956 | Unknown, POSSIBLY ACTS ON THIOREDOXIN.POSSIBLE MEMBRANE-ANCHORED THIOREDOXIN-LIKE PROTEIN (THIOL-DISULFIDE INTERCHANGE RELATED PROTEIN) |
| Rv3686c |       | intermediary metabolism      | 1,60004E-08 | Unknown                                                                                                                                 |
| Rv3733c |       | and respiration              | 0,002504642 | Unknown                                                                                                                                 |
| Rv3825c |       | conserved hypotheticals      | 0,000134584 | PROBABLE POLYKETIDE SYNTHASE PKS2                                                                                                       |
| Rv3837c | pcnA  | lipid metabolism             | 3,06494E-07 | METABOLISM [CATALYTIC ACTIVITY: 3-PHOSPHOGLYCERATE = 2-PHOSPHOGLYCERATE].                                                               |
| Rv3906c |       | intermediary metabolism      | 2,7215E-12  | Unknown                                                                                                                                 |
| Rv3907c | rnpA  | and respiration              | 0,001273772 | INVOLVED IN TRANSCRIPTION MECHANISM [CATALYTIC ACTIVITY: N ATP + (NUCLEOTIDE)(M) = N DIPHOSPHATE + (NUCLEOTIDE)(M+N)].                  |
| Rv3922c |       | conserved hypotheticals      | 5,51564E-05 | Unknown, POSSIBLE HEMOLYSIN                                                                                                             |
| Rv3923c |       | information pathways         | 6,07044E-06 | RNaseP CATALYZES THE REMOVAL OF THE 5'-LEADER SEQUENCE FROM PRE-tRNA TO PRODUCE THE MATURE 5'TERMINUS                                   |

Genes under the control of the DosR Regulon

**Table S1F. Significant over expressed genes in the fatty acid during stationary phase (FS versus DS)**

| Gene   | Gene name | Functional category                     | FDR Fisher Exact Test | Function                                                                                                                                                                                        |
|--------|-----------|-----------------------------------------|-----------------------|-------------------------------------------------------------------------------------------------------------------------------------------------------------------------------------------------|
| Rv0079 |           | conserved hypotheticals                 | 3,371E-07             | Unknown, probable transduction regulatory protein<br>Belongs to pyridoxine 5'-phosphate (PNP) oxidase-like (PNPOx-like)                                                                         |
| Rv0080 |           | conserved hypotheticals                 | 1,19E-09              | superfamily; EC:1.4.3.5)                                                                                                                                                                        |
| Rv0081 |           | regulatory proteins                     | 0,0139256             | PROBABLE TRANSCRIPTIONAL REGULATORY PROTEIN                                                                                                                                                     |
| Rv0103 | ctpB      | cell wall and cell processes            | 0,0275168             | PROBABLE CATION-TRANSPORTER P-TYPE ATPase B CTPB                                                                                                                                                |
| Rv0211 | pckA      | intermediary metabolism and respiration | 4,027E-14             | RATE-LIMITING GLUCONEOGENIC ENZYME [CATALYTIC ACTIVITY: GTP + OXALOACETATE = GDP + PHOSPHOENOLPYRUVATE + CO2].                                                                                  |
| Rv0243 | fadA2     | Lipid metabolism                        | 9,87E-05              | Lipid degradation; PROBABLE ACETYL-CoA ACYLTRANSFERASE FADA2 (3-KETOACYL-CoA THIOLASE) (BETA-KETOTHIOLASE)                                                                                      |
| Rv0280 | PPE3      | PE/PPE                                  | 0,0006429             | Unknown                                                                                                                                                                                         |
| Rv0285 | PE5       | PE/PPE                                  | 0,0017017             | Unknown                                                                                                                                                                                         |
| Rv0286 | PPE4      | PE/PPE                                  | 0,0136625             | Unknown                                                                                                                                                                                         |
| Rv0287 | esxG      | cell wall and cell processes            | 4,948E-12             | Unknown, ESAT-6 LIKE PROTEIN ESXG                                                                                                                                                               |
| Rv0288 | esxH      | cell wall and cell processes            | 1,549E-06             | (CFP-7)                                                                                                                                                                                         |
| Rv0289 | espG3     | cell wall and cell processes            | 9,038E-13             | Unknown, ESX-3 SECRETION-ASSOCIATED PROTEIN ESPG3                                                                                                                                               |
| Rv0290 | eccD3     | cell wall and cell processes            | 0,0414317             | Transmembrane protein                                                                                                                                                                           |
| Rv0341 | iniB      | cell wall and cell processes            | 3,57E-13              | Unknown, Isoniazide induced                                                                                                                                                                     |
| Rv0467 | icl1      | intermediary metabolism and respiration | 3,877E-09             | INVOLVED IN GLYOXYLATE BYPASS, CATALYTIC ACTIVITY: ISOCITRATE = SUCCINATE + GLYOXYLATE]. INVOLVED IN THE PERSISTENCE IN THE HOST.                                                               |
| Rv0510 | hemC      | intermediary metabolism and respiration | 3,428E-06             | INVOLVED IN PORPHYRIN BIOSYNTHESIS, [CATALYTIC ACTIVITY: 4 PORPHOBILINOGEN + H2O = HYDROXYMETHYLBILANE + 4 NH3].                                                                                |
| Rv0569 |           | conserved hypotheticals                 | 9,038E-13             | Unknown, Also similar to T36824 SCI35.11 hypothetical protein from Streptomyces coelicolor (64 aa); and N-terminus of T36956 probable DNA-binding protein from Streptomyces coelicolor (323 aa) |

|         |       |                                         |           |                                                                                                                                         |
|---------|-------|-----------------------------------------|-----------|-----------------------------------------------------------------------------------------------------------------------------------------|
| Rv0570  | nrdZ  | information pathways                    | 0,0042419 | INVOLVED IN THE DNA REPLICATION PATHWAY, (RIBONUCLEOTIDE REDUCTASE)                                                                     |
| Rv0628c |       | conserved hypotheticals                 | 1,099E-06 | Unknown                                                                                                                                 |
| Rv0652  | rplL  | information pathways                    | 0,0414317 | RIBOSOMAL PROTEIN L7/L12 RPL (SA1). APPEARS TO BE ESSENTIAL FOR ACCURATE TRANSLATION.                                                   |
| Rv0701  | rplC  | information pathways                    | 1,163E-10 | This protein binds directly to 23S ribosomal RNA and may participate in the formation of the peptidyltransferase center of the ribosome |
| Rv0702  | rplD  | information pathways                    | 0,0005062 | THIS PROTEIN BINDS DIRECTLY AND SPECIFICALLY TO 23S RRNA                                                                                |
| Rv0704  | rplD  | information pathways                    | 0,0013988 | THIS PROTEIN IS A PRIMARY 23S RRNA-BINDING PROTEIN. IT HAS PEPTIDYLTRANSFERASE ACTIVITY                                                 |
| Rv0710  | rpsQ  | information pathways                    | 2,356E-06 | PROTEIN S17, ribosomal protein                                                                                                          |
| Rv0939  |       | intermediary metabolism and respiration | 0,0275168 | FUNCTION UNKNOWN; PROBABLY INVOLVED IN CELLULAR METABOLISM, POSSIBLY IN A DEGRADATION PATHWAY.                                          |
| Rv0960  | vapC9 | virulence, detoxification, adaptation   | 9,038E-13 | PIN Domain                                                                                                                              |
| Rv1065  |       | conserved hypotheticals                 | 9,038E-13 | Unknown                                                                                                                                 |
| Rv1066  |       | conserved hypotheticals                 | 9,038E-13 | Unknown                                                                                                                                 |
| Rv1078  | para  | conserved hypotheticals                 | 0,0015892 | Unknown, PROBABLE PROLINE-RICH ANTIGEN HOMOLOG PARA                                                                                     |
| Rv1133c | metA  | intermediary metabolism and respiration | 0,0122387 | METHIONINE SYNTHASE                                                                                                                     |
| Rv1184c |       | cell wall and cell processes            | 0,0239865 | Putative lipase, esterase or cutinase                                                                                                   |
| Rv1194c |       | conserved hypotheticals                 | 1,009E-05 | Unknown                                                                                                                                 |
| Rv1284  | canA  | intermediary metabolism and respiration | 0,0015892 | CATALYZES REVERSIBLE DEHYDRATION OF CO2 TO FORM BICARBONATE                                                                             |
| Rv1317c | alkA  | information pathways                    | 0,0001083 | PROBABLE BIFUNCTIONAL REGULATORY PROTEIN AND DNA REPAIR ENZYME ALKA                                                                     |
| Rv1324  |       | intermediary metabolism and respiration | 0,0004271 | Thiorredoxin                                                                                                                            |

|         |        |                                         |           |                                                                                                                                        |
|---------|--------|-----------------------------------------|-----------|----------------------------------------------------------------------------------------------------------------------------------------|
| Rv1465  |        | intermediary metabolism and respiration | 0,0020951 | Unknown, POSSIBLE NITROGEN FIXATION RELATED PROTEIN                                                                                    |
| Rv1466  |        | conserved hypotheticals                 | 3,754E-05 | Unknown                                                                                                                                |
| Rv1535  |        | conserved hypotheticals                 | 9,038E-13 | Unknown                                                                                                                                |
| Rv1560  | vapB11 | virulence, detoxification, adaptation   | 0,0056757 | Unknown, POSSIBLE ANTITOXIN VAPB11                                                                                                     |
| Rv1572  |        | insertion seqs and phages               | 0,0241859 | Unknown                                                                                                                                |
| Rv1652  | argC   | intermediary metabolism and respiration | 8,327E-05 | INVOLVED IN ARGININE BIOSYNTHESIS, N-ACETYL-L-GLUTAMATE 5-SEMIALDEHYDE + NADP(+) + PHOSPHATE = N-ACETYL-5-GLUTAMYL PHOSPHATE + NADPH]. |
| Rv1690  | lprJ   | cell wall and cell processes            | 0,0056757 | Unknown, Prokaryotic membrane lipoprotein lipid attachment site                                                                        |
| Rv1733c |        | cell wall and cell processes            | 0,0122387 | Unknown, PROBABLE CONSERVED TRANSMEMBRANE PROTEIN                                                                                      |
| Rv1738  |        | conserved hypotheticals                 | 9,038E-13 | Unknown                                                                                                                                |
| Rv1779  |        | cell wall and cell processes            | 0,0095015 | Unknown, POSSIBLE INTEGRAL MEMBRANE PROTEIN                                                                                            |
| Rv1789  | PPE26  | PE/PPE                                  | 0,0321683 | Unknown                                                                                                                                |
| Rv1847  |        | conserved hypotheticals                 | 0,0015892 | Unknown                                                                                                                                |
| Rv1848  | ureA   | intermediary metabolism and respiration | 9,038E-13 | INVOLVED IN THE CONVERSION OF UREA TO NH3 [CATALYTIC ACTIVITY: UREA + H2O = CO2 + 2 NH3]                                               |
| Rv1887  |        | conserved hypotheticals                 | 0,0080521 | Unknown                                                                                                                                |
| Rv1989  |        | conserved hypotheticals                 | 9,038E-13 | Unknown                                                                                                                                |
| Rv1996  |        | virulence, detoxification, adaptation   | 6,268E-06 | Unknown, UNIVERSAL STRESS PROTEIN FAMILY PROTEIN                                                                                       |
| Rv2005  |        | virulence, detoxification, adaptation   | 3,155E-13 | Unknown, Universal stress protein family                                                                                               |
| Rv2007  | fdxA   | intermediary metabolism and respiration | 9,038E-13 | Ferredoxin FdxA                                                                                                                        |
| Rv2030c |        | conserved hypotheticals                 | 3,875E-10 | Unknown                                                                                                                                |

|         |        |                                                                            |           |                                                                                                                                    |
|---------|--------|----------------------------------------------------------------------------|-----------|------------------------------------------------------------------------------------------------------------------------------------|
| Rv2031c | hspX   | virulence, detoxification, adaptation                                      | 9,038E-13 | STRESS PROTEIN INDUCED BY ANOXIA. HAS A PROPOSED ROLE IN MAINTENANCE OF LONG-TERM VIABILITY DURING LATENT, ASYMPTOMATIC INFECTIONS |
| Rv2091c |        | cell wall and cell processes                                               | 5,67E-13  | contains potential transmembrane region                                                                                            |
| Rv2376c | cfp2   | cell wall and cell processes                                               | 0,0017017 | FUNCTION NOT KNOWN (PUTATIVE SECRETED PROTEIN); CFP2                                                                               |
| Rv2396  | 41     | PE/PPE                                                                     | 0,0032543 | Unknown                                                                                                                            |
| Rv2430c | PPE41  | PE/PPE                                                                     | 1,733E-10 | Unknown                                                                                                                            |
| Rv2431c | PE25   | PE/PPE                                                                     | 4,56E-09  | Unknown                                                                                                                            |
| Rv2477c |        | cell wall and cell processes<br>intermediary metabolism and<br>respiration | 9,144E-13 | THOUGHT TO BE INVOLVED IN ACTIVE TRANSPORT OF MACROLIDE ACROSS THE MEMBRANE (EXPORT):                                              |
| Rv2584c | apt    |                                                                            | 8,014E-05 | INVOLVED IN PURINE SALVAGE                                                                                                         |
| Rv2586c | secF   | cell wall and cell processes                                               | 0,0188785 | INVOLVED IN PROTEIN EXPORT                                                                                                         |
| Rv2623  | TB31.7 | virulence, detoxification, adaptation                                      | 9,038E-13 | Unknown, UNIVERSAL STRESS PROTEIN FAMILY PROTEIN TB31.7                                                                            |
| Rv2625c |        | cell wall and cell processes                                               | 1,444E-06 | Unknown, PROBABLE CONSERVED TRANSMEMBRANE ALANINE AND LEUCINE RICH PROTEIN                                                         |
| Rv2626c | hrp1   | conserved hypotheticals                                                    | 9,038E-13 | Unknown                                                                                                                            |
| Rv2627c |        | conserved hypotheticals                                                    | 2,957E-06 | Unknown                                                                                                                            |
| Rv2628  |        | conserved hypotheticals                                                    | 1,177E-05 | Unknown                                                                                                                            |
| Rv2629  |        | conserved hypotheticals                                                    | 4,16E-08  | Unknown                                                                                                                            |
| Rv2661c |        | conserved hypotheticals                                                    | 0,0059828 | Unknown                                                                                                                            |
| Rv2696c |        | conserved hypotheticals                                                    | 9,038E-13 | Unknown                                                                                                                            |
| Rv2697c | dut    | intermediary metabolism and<br>respiration                                 | 9,038E-13 | INVOLVED IN BIOSYNTHESIS OF THYMIDYLATE, [CATALYTIC ACTIVITY: DUTP + H(2)O = DUMP + PYROPHOSPHATE]                                 |
| Rv2718c | nrdR   | regulatory proteins                                                        | 0,0009962 | PROBABLE TRANSCRIPTIONAL REGULATORY PROTEIN NRDR                                                                                   |

|         |        |                                         |           |                                                                                                                                                    |
|---------|--------|-----------------------------------------|-----------|----------------------------------------------------------------------------------------------------------------------------------------------------|
| Rv2760c | vapB42 | virulence, detoxification, adaptation   | 0,0066982 | Possible antitoxin                                                                                                                                 |
| Rv2777c |        | conserved hypotheticals                 | 0,0006216 | Unknown                                                                                                                                            |
| Rv2794c | pptT   | lipid metabolism                        | 8,327E-05 | BIOSYNTHESIS OF FATTY ACIDS AND LIPIDS<br>THOUGHT TO BE INVOLVED IN TRANSPORT OF UNDETERMINED SUBSTRATE                                            |
| Rv2846c | efpA   | cell wall and cell processes            | 0,0023339 | (POSSIBLY DRUG) ACROSS THE MEMBRANE (EXPORT)                                                                                                       |
| Rv2916c | ffh    | cell wall and cell processes            | 0,0009962 | NECESSARY FOR EFFICIENT EXPORT OF EXTRA-CYTOPLASMIC PROTEINS                                                                                       |
| Rv2931  | ppsA   | Lipid metabolism                        | 0,0414317 | DIM Biosintesis                                                                                                                                    |
| Rv2995c | leuB   | intermediary metabolism and respiration | 6,543E-05 | INVOLVED IN LEUCINE BIOSYNTHESIS, [CATALYTIC ACTIVITY: 3-CARBOXY-2-HYDROXY-4-METHYLPENTANOATE + NAD(+) = 3-CARBOXY-4-METHYL-2-OXOPENTANOATE + NADH |
| Rv2996c | serA1  | intermediary metabolism and respiration | 0,0188785 | L-SERINE BIOSYNTHESIS [CATALYTIC ACTIVITY: 3-PHOSPHOGLYCERATE + NAD(+) = 3-PHOSPHOHYDROXYPYRUVATE + NADH].                                         |
| Rv3001c | ilvC   | intermediary metabolism and respiration | 5,682E-12 | INVOLVED IN VALINE AND ISOLEUCINE BIOSYNTHESIS, (R)-2,3-DIHYDROXY-3-METHYLBUTANOATE + NADP(+) = (S)-2-HYDROXY-2-METHYL-3-OXOBUTANOATE + NADPH].    |
| Rv3002c | ilvN   | intermediary metabolism and respiration | 0,0139256 | INVOLVED IN VALINE AND ISOLEUCINE BIOSYNTHESIS, [CATALYTIC ACTIVITY: 2-ACETOLACTATE + CO(2) = 2-PYRUVATE].                                         |
| Rv3127  |        | conserved hypotheticals                 | 0,0032543 | Unknown                                                                                                                                            |
| Rv3130c | tgs1   | lipid metabolism                        | 2,073E-13 | Triacylglycerol synthase                                                                                                                           |
| Rv3131  |        | conserved hypotheticals                 | 9,038E-13 | unknown                                                                                                                                            |
| Rv3133c | devR   | regulatory proteins                     | 6,543E-05 | REGULATOR PART OF THE TWO COMPONENT REGULATORY SYSTEM<br>DEV/DEV/DOST                                                                              |
| Rv3134c |        | virulence, detoxification, adaptation   | 3,194E-10 | UNIVERSAL STRESS PROTEIN FAMILY PROTEIN                                                                                                            |
| Rv3207c |        | conserved hypotheticals                 | 5,206E-06 | Unknown                                                                                                                                            |
| Rv3208A | TB9.4  | conserved hypotheticals                 | 0,0188785 | Unknown                                                                                                                                            |

|         |        |                                         |           |                                                                                                                                                             |
|---------|--------|-----------------------------------------|-----------|-------------------------------------------------------------------------------------------------------------------------------------------------------------|
| Rv3236c |        | cell wall and cell processes            | 0,0003346 | PROBABLE CONSERVED INTEGRAL MEMBRANE TRANSPORT PROTEIN, possibly cation (Na/H) transporter                                                                  |
| Rv3341  | metA   | intermediary metabolism and respiration | 0,0001015 | CATALYZES ACYLATION OF L-HOMOSERINE. INVOLVED IN BIOSYNTHESIS OF METHIONINE, [CATALYTIC ACTIVITY: ACETYL-CoA + L-HOMOSERINE = CoA + O-ACETYL-L-HOMOSERINE]. |
| Rv3342  |        | intermediary metabolism and respiration | 0,0003731 | CAUSES METHYLATION                                                                                                                                          |
| Rv3371  |        | lipid metabolism                        | 0,0414317 | MAY BE INVOLVED IN SYNTHESIS OF TRIACYLGLYCEROL                                                                                                             |
| Rv3385c | VapB46 | virulence, detoxification, adaptation   | 3,34E-05  | Possible antitoxin                                                                                                                                          |
| Rv3416  | whiB3  | regulatory proteins                     | 0,0091346 | TRANSCRIPTIONAL REGULATORY PROTEIN WHIB-LIKE WHIB3. CONTAINS [4FE-4S] CLUSTER.                                                                              |
| Rv3477  | PE31   | PE/PPE                                  | 9,038E-13 | Unknown                                                                                                                                                     |
| Rv3478  | PPE60  | PE/PPE                                  | 9,038E-13 | Unknown                                                                                                                                                     |
| Rv3612c |        | conserved hypotheticals                 | 0,0139256 | Unknown                                                                                                                                                     |
| Rv3614c | espD   | cell wall and cell processes            | 9,038E-13 | ESX-1 SECRETION-ASSOCIATED PROTEIN ESPD                                                                                                                     |
| Rv3615c | espC   | cell wall and cell processes            | 9,038E-13 | ESX-1 SECRETION-ASSOCIATED PROTEIN ESPC                                                                                                                     |
| Rv3616c | espA   | cell wall and cell processes            | 9,038E-13 | ESX-1 SECRETION-ASSOCIATED PROTEIN A, ESPA                                                                                                                  |
| Rv3686c |        | conserved hypotheticals                 | 3,255E-07 | Unknown                                                                                                                                                     |
| Rv3704c | gshA   | intermediary metabolism and respiration | 0,0188785 | INVOLVED IN GLUTATHIONE BIOSYNTHESIS                                                                                                                        |

Genes under the control of the DosR regulon
