# Supplementary material for: Global Adaptation to a Lipid Environment Triggers the Dormancy-Related Phenotype of Mycobacterium tuberculosis
Source: PubMed Central journal article supplement — mBio. 2014 May 20;5(3):e01125-14. doi: 10.1128/mBio.01125-14 (PMC4030484; doi:10.1128/mbio.01125-14), 2014-05-20
Supplement: mbo002141827st2.pdf [file mbo002141827st2.pdf]

**Table S2A. RPKMs of the tRNAs**

| INTERGENIC REGION | Tag number | t-RNA          | RPKM   |         |        |                |
|-------------------|------------|----------------|--------|---------|--------|----------------|
|                   |            |                | DE     | DS      | FE     | FS             |
| Rv0007-Rv0008c    | MTB000001  | tRNA-Ile (GAT) | 179,43 | 192,46  | 70,50  | 721,12         |
| Rv0007-Rv0008c    | MTB000002  | tRNA-Ala (TGC) | 49,28  | 64,27   | 30,67  | 97,02          |
| Rv0020c-Rv0021c   | MTB000003  | tRNA-Leu (CAG) | 237,30 | 49,75   | 88,21  | 1043,60        |
| Rv0317c-Rv0318c   | MTB000004  | tRNA-Gly (CCC) | 433,73 | 221,74  | 153,49 | 756,96         |
| Rv0566c-Rv0567    | MTB000005  | tRNA-Tyr (GTA) | 5,48   | 5,54    | 0,00   | 63,34          |
| Rv0634A-Rv0634B   | MTB000006  | tRNA-Thr (GGT) | 77,85  | 38,80   | 77,97  | 819,20         |
| Rv0634A-Rv0634B   | MTB000007  | tRNA-Met (CAT) | 146,17 | 122,92  | 85,57  | 434,40         |
| Rv0637-Rv0638     | MTB000008  | tRNA-Trp (CCA) | 330,80 | 150,94  | 133,32 | 87,15          |
| Rv0755A-Rv0756c   | MTB000009  | tRNA-Thr (TGT) | 56,34  | 135,52  | 59,18  | 489,38         |
| Rv0831c-Rv0832    | MTB000010  | tRNA-Lys (TTT) | 13,98  | 3,98    | 2,99   | 213,96         |
| Rv0831c-Rv0832    | MTB000011  | tRNA-Glu (TTC) | 131,21 | 110,00  | 120,19 | 516,35         |
| Rv0831c-Rv0832    | MTB000012  | tRNA-Asp (GTC) | 252,24 | 174,10  | 260,93 | 1101,40        |
| Rv0831c-Rv0832    | MTB000013  | tRNA-Phe (GAA) | 43,06  | 56,50   | 30,38  | 148,52         |
| Rv0919-Rv0920c    | MTB000014  | tRNA-Arg (CCT) | 40,78  | 80,14   | 26,15  | 235,43         |
| Rv0996-Rv0997     | MTB000015  | tRNA-Ala (CGC) | 31,41  | 8,78    | 15,55  | 229,38         |
| Rv1018c-Rv1019    | MTB000016  | tRNA-Gln (TTG) | 15,12  | 3,83    | 10,10  | 12,03          |
| Rv1055-Rv1056     | MTB000017  | tRNA-Leu (TAA) | 5,48   | 8,31    | 7,81   | 311,09         |
| Rv1291c-Rv1292    | MTB000018  | tRNA-Arg (CCG) | 1,61   | 3,66    | 17,89  | 210,20         |
| Rv1347c-Rv1348    | MTB000022  | tRNA-Leu (TAG) | 50,97  | 75,12   | 18,68  | 95,09          |
| Rv1625c-Rv1626    | MTB000023  | tRNA-Leu (CAA) | 31,84  | 2,54    | 30,09  | 229,10         |
| Rv1719-Rv1720c    | MTB000024  | tRNA-Pro (GGG) | 15,06  | 25,70   | 14,48  | 249,62         |
| Rv2141c-Rv2142c   | MTB000025  | tRNA-Leu (GAG) | 105,84 | 43,79   | 64,63  | 377,23         |
| Rv2237A-Rv2238c   | MTB000027  | tRNA-Val (TAC) | 86,45  | 38,35   | 108,77 | 437,66         |
| Rv2308-Rv2309c    | MTB000028  | tRNA-Met (CAT) | 29,98  | 18,19   | 6,15   | 9,79           |
| Rv2340c-Rv2341    | MTB000029  | tRNA-Asn (GTT) | 7,94   | 24,10   | 116,81 | <b>1958,04</b> |
| Rv2462c-Rv2463    | MTB000030  | tRNA-Pro (TGG) | 23,35  | 51,46   | 45,64  | 68,64          |
| Rv2462c-Rv2463    | MTB000031  | tRNA-Gly (TCC) | 49,92  | 24,53   | 37,27  | 113,33         |
| Rv2485c-Rv2486    | MTB000032  | tRNA-Arg (TCT) | 211,73 | 295,03  | 301,70 | <b>1726,52</b> |
| Rv2511-Rv2512c    | MTB000033  | tRNA-His (GTG) | 642,08 | 1445,13 | 734,60 | <b>8337,06</b> |
| Rv2518c-Rv2519    | MTB000034  | tRNA-Lys (CTT) | 54,49  | 318,08  | 23,75  | 104,10         |

|                |           |                 |        |        |        |                |
|----------------|-----------|-----------------|--------|--------|--------|----------------|
| Rv2644c-Rv2645 | MTB000035 | tRNA-Val (CAC)  | 15,99  | 9,49   | 117,66 | 432,58         |
| Rv2644c-Rv2645 | MTB000036 | tRNA-Gly (GCC)  | 175,41 | 81,01  | 115,10 | 346,03         |
| Rv2644c-Rv2645 | MTB000037 | tRNA-Cys (GCA)  | 19,81  | 22,09  | 14,94  | 28,53          |
| Rv2644c-Rv2645 | MTB000038 | tRNA-Val (GAC)  | 125,83 | 53,55  | 340,06 | <b>6557,80</b> |
| Rv2991-Rv2992c | MTB000039 | tRNA-Glu (CTC)  | 16,18  | 57,44  | 30,99  | 48,87          |
| Rv2991-Rv2992c | MTB000040 | tRNA-Gln (CTG)  | 28,56  | 89,59  | 36,10  | 91,08          |
| Rv3067-Rv3068c | MTB000041 | tRNA-Ala (GGC)  | 54,89  | 29,74  | 10,73  | 336,02         |
| Rv3191c-Rv3192 | MTB000043 | tRNA-fMet (CAT) | 82,07  | 128,03 | 113,86 | 701,46         |
| Rv3643-Rv3644c | MTB000044 | tRNA-Thr (CGT)  | 18,20  | 101,99 | 82,55  | 809,71         |
| Rv3684-Rv3685c | MTB000045 | tRNA-Pro (CGG)  | 9,29   | 1,17   | 5,30   | 71,09          |
| Rv3722c-Rv3723 | MTB000046 | tRNA-Ser (GGA)  | 126,19 | 50,58  | 20,73  | 13,49          |
| Rv3751-Rv3752c | MTB000047 | tRNA-Ser (CGA)  | 43,02  | 7,14   | 28,73  | 56,23          |
| Rv3771c-Rv3772 | MTB000048 | tRNA-Arg (ACG)  | 8,05   | 9,77   | 17,89  | 945,92         |
| Rv3771c-Rv3772 | MTB000049 | tRNA-Ser (GCT)  | 67,77  | 14,02  | 100,07 | 133,79         |

In **bold** are the four most expressed tRNAs in the stationary phase of growth in fatty acid medium

**Table S2B. RPKM of the intergenic regions (IGR) without tRNAs**

| Location (bp) | Between genes   | RPKM  |       |       |       | Annotations (REF)        |
|---------------|-----------------|-------|-------|-------|-------|--------------------------|
|               |                 | DE    | DS    | FE    | FS    |                          |
| 1626-1898c    | Rv0001-Rv0002   | 10,75 | 18,69 | 6,90  | 2,74  |                          |
| 2010-2075c    | Rv0001-Rv0002   | 0,00  | 14,06 | 0,00  | 1,89  |                          |
| 7178-7419     | Rv0005-Rv0006   | 43,98 | 7,67  | 19,45 | 5,16  |                          |
| 9846-9939     | Rv0006-Rv0007   | 53,36 | 5,92  | 25,59 | 10,62 |                          |
| 11031-11094c  | Rv0007-Rv0008c  | 5,73  | 18,85 | 8,17  | 0,00  |                          |
| 11196-11333   | Rv0007-Rv0008c  | 62,05 | 59,84 | 45,47 | 13,57 |                          |
| 12264-12365c  | Rv0008c-Rv0009  | 10,79 | 16,37 | 4,10  | 4,89  |                          |
| 12407-12496c  | Rv0008c-Rv0009  | 21,75 | 8,25  | 1,16  | 1,39  |                          |
| 13040-13126c  | Rv0009-Rv0010c  | 2,81  | 17,07 | 7,21  | 2,87  |                          |
| 13500-13757c  | Rv0010c-Rv0011c | 17,07 | 55,39 | 6,89  | 8,22  |                          |
| 23699-23945c  | Rv0019c-Rv0020c | 63,89 | 15,40 | 24,98 | 3,54  | miotto:candidate_1A* (8) |
| 25511-25612   | Rv0020c-Rv0021c | 4,80  | 13,65 | 1,03  | 0,00  |                          |
| 29676-29726   | Rv0025-Rv0026   | 19,19 | 1,82  | 12,30 | 2,45  |                          |
| 31770-31926   | Rv0028-Rv0029   | 3,12  | 21,28 | 7,33  | 4,77  |                          |
| 31802-31925c  | Rv0028-Rv0029   | 10,85 | 20,20 | 12,65 | 3,02  |                          |
| 33873-34107c  | Rv0031-Rv0032   | 1,04  | 15,79 | 0,00  | 0,00  |                          |
| 41864-41990c  | Rv0038-Rv0039c  | 22,16 | 5,11  | 33,77 | 3,93  |                          |
| 42332-42399c  | Rv0039c-Rv0040c | 5,40  | 1,36  | 18,46 | 1,84  |                          |
| 47197-47297   | Rv0042c-Rv0043c | 0,00  | 17,46 | 0,00  | 0,00  |                          |
| 49946-50075c  | Rv0045c-Rv0046c | 36,70 | 47,11 | 13,68 | 0,96  |                          |
| 52706-52936   | Rv0048c-Rv0049  | 26,48 | 28,12 | 8,60  | 4,32  |                          |
| 53506-53586   | Rv0049-Rv0050   | 18,12 | 1,15  | 2,58  | 0,00  |                          |
| 58431-58710   | Rv0053-Rv0054   | 35,39 | 10,60 | 4,48  | 3,12  |                          |
| 65412-65517c  | Rv0061c-Rv0062  | 16,16 | 21,01 | 7,89  | 3,53  |                          |
| 66778-66855   | Rv0062-Rv0063   | 18,82 | 0,00  | 10,73 | 0,00  |                          |
| 68480-68694   | Rv0063-Rv0064   | 67,71 | 78,98 | 14,59 | 22,64 |                          |
| 71517-71619   | Rv0064-Rv0064A  | 3,56  | 18,92 | 1,02  | 2,42  |                          |
| 74510-74570   | Rv0066c-Rv0067c | 0,00  | 16,73 | 0,00  | 0,00  |                          |
| 79075-79314c  | Rv0070c-Rv0071  | 70,34 | 6,57  | 3,92  | 2,08  |                          |

|                |                 |        |        |        |       |                                                                                     |
|----------------|-----------------|--------|--------|--------|-------|-------------------------------------------------------------------------------------|
| 80503-80610c   | Rv0071-Rv0072   | 2,27   | 18,04  | 1,94   | 4,62  |                                                                                     |
| 82654-82755    | Rv0073-Rv0074   | 3,60   | 10,92  | 6,15   | 3,67  |                                                                                     |
| 97558-97661    | Rv0088-Rv0089   | 9,41   | 14,28  | 3,02   | 0,00  |                                                                                     |
| 97683-97783    | Rv0088-Rv0089   | 13,32  | 11,94  | 3,11   | 1,24  |                                                                                     |
| 98420-98517    | Rv0089-Rv0090   | 0,00   | 11,36  | 0,00   | 0,00  |                                                                                     |
| 119705-119814  | Rv0102-Rv0103c  | 10,01  | 18,56  | 10,46  | 5,67  |                                                                                     |
| 130472-130618c | Rv0107c-Rv0108c | 26,63  | 8,21   | 40,55  | 5,09  |                                                                                     |
| 133845-133941  | Rv0110-Rv0111   | 17,66  | 2,87   | 5,39   | 2,57  |                                                                                     |
| 137254-137306  | Rv0112-Rv0113   | 4,62   | 17,51  | 3,95   | 2,35  |                                                                                     |
| 139668-139755  | Rv0115-Rv0116c  | 15,29  | 0,00   | 15,45  | 9,93  |                                                                                     |
| 139726-139902c | Rv0115-Rv0116c  | 4,15   | 14,68  | 1,77   | 3,53  |                                                                                     |
| 139837-139937  | Rv0115-Rv0116c  | 1,21   | 13,78  | 3,11   | 3,71  |                                                                                     |
| 140009-140060  | Rv0115-Rv0116c  | 2,35   | 14,28  | 10,06  | 7,20  |                                                                                     |
| 149189-149289  | Rv0123-Rv0124   | 9,69   | 12,86  | 1,04   | 0,00  |                                                                                     |
| 152059-152425  | Rv0125-Rv0126   | 14,33  | 39,44  | 3,42   | 1,36  |                                                                                     |
| 156428-156538  | Rv0128-Rv0129c  | 23,14  | 7,52   | 0,00   | 1,12  |                                                                                     |
| 171133-171234  | Rv0144-Rv0145   | 9,59   | 10,01  | 16,41  | 2,45  |                                                                                     |
| 177002-177223  | Rv0150c-Rv0151c | 9,37   | 30,93  | 1,88   | 7,31  |                                                                                     |
| 177348-177445c | Rv0150c-Rv0151c | 2,50   | 12,31  | 1,07   | 1,27  |                                                                                     |
| 181064-181241c | Rv0152c-Rv0153c | 32,30  | 2,09   | 9,40   | 3,51  |                                                                                     |
| 196556-196973  | Rv0166-Rv0167   | 202,23 | 15,32  | 102,84 | 5,37  | miotto:candidate_19A (8)                                                            |
| 219908-219973  | Rv0188-Rv0189c  | 109,36 | 209,48 | 23,77  | 15,13 | miotto:candidate_24A (8)                                                            |
| 221729-221783  | Rv0189c-Rv0190  | 4,45   | 16,87  | 0,00   | 2,27  |                                                                                     |
| 222101-222371  | Rv0190-Rv0191   | 5,42   | 37,66  | 14,67  | 3,22  |                                                                                     |
| 230624-231055  | Rv0194-Rv0195   | 0,00   | 33,72  | 0,00   | 0,29  |                                                                                     |
| 255935-256149  | Rv0213c-Rv0214  | 1,71   | 18,13  | 0,49   | 1,74  |                                                                                     |
| 267726-267815c | Rv0223c-Rv0224c | 24,47  | 39,18  | 11,62  | 4,16  |                                                                                     |
| 287059-287110c | Rv0236A-Rv0237  | 28,23  | 10,71  | 10,06  | 4,80  |                                                                                     |
| 292001-292155c | Rv0242c-Rv0243  | 61,56  | 16,76  | 27,67  | 1,61  |                                                                                     |
|                |                 |        |        |        |       | MTB000051,mpr13,ncRNA:RVnc000<br>8,arnvig:MTS0194 (7);<br>miotto:candidate_29A (8); |
| 293566-293647  | Rv0243-Rv0244c  | 62,66  | 6,79   | 15,31  | 6,09  | Dichiara2:Mcr14                                                                     |
| 295966-296031  | Rv0244c-Rv0245  | 12,97  | 15,47  | 7,92   | 1,89  |                                                                                     |

|                |                 |        |         |        |       |                           |
|----------------|-----------------|--------|---------|--------|-------|---------------------------|
| 296666-296847  | Rv0245-Rv0246   | 9,41   | 12,24   | 26,43  | 4,11  |                           |
| 301577-301800c | Rv0249c-Rv0250c | 51,88  | 560,48  | 22,41  | 6,13  |                           |
| 321126-321329c | Rv0266c-Rv0267  | 12,59  | 22,74   | 9,74   | 3,06  |                           |
| 333129-333184c | Rv0277c-Rv0278c | 24,03  | 67,94   | 22,41  | 20,06 |                           |
|                |                 |        |         |        |       | misc_feature:Rv0277A*;    |
| 333196-333408  | Rv0277c-Rv0278c | 21,25  | 8,71    | 0,98   | 7,03  | miotto:candidate_42A (8)  |
| 340717-341275  | Rv0280-Rv0281   | 66,09  | 25,07   | 21,33  | 24,78 |                           |
| 341872-341952c | Rv0281-Rv0282   | 54,37  | 10,31   | 29,70  | 6,16  |                           |
| 341991-342251  | Rv0281-Rv0282   | 629,02 | 92,08   | 172,31 | 99,94 | miotto:candidate_43A (8)  |
| 352948-353160  | Rv0289-Rv0290   | 66,05  | 3,92    | 22,59  | 4,69  | miotto:candidate_44A (8)  |
| 377832-377883  | Rv0308-Rv0309   | 82,34  | 12,49   | 22,12  | 0,00  |                           |
| 380358-380451  | Rv0311-Rv0312   | 6,51   | 14,81   | 1,11   | 1,33  |                           |
| 382330-382592  | Rv0312-Rv0313   | 216,76 | 178,88  | 75,16  | 64,54 |                           |
| 385068-385260c | Rv0316-Rv0317c  | 27,89  | 5,77    | 9,75   | 3,88  |                           |
| 387782-387874c | Rv0319-Rv0320   | 0,00   | 16,96   | 0,00   | 1,34  |                           |
| 397183-397692  | Rv0331-Rv0332   | 4,56   | 44,76   | 0,62   | 0,49  |                           |
| 398605-398695  | Rv0333-Rv0334   | 30,92  | 52,00   | 6,90   | 4,11  |                           |
| 409213-409314c | Rv0340-Rv0341   | 0,00   | 20,92   | 0,00   | 1,22  |                           |
| 414236-414335c | Rv0343-Rv0344c  | 23,24  | 0,93    | 3,14   | 0,00  |                           |
| 417251-417352  | Rv0346c-Rv0347  | 45,58  | 5,46    | 11,28  | 3,67  |                           |
| 419675-419766c | Rv0349-Rv0350   | 13,30  | 13,11   | 11,37  | 1,36  | miotto:candidate_49A* (8) |
| 419713-419842  | Rv0349-Rv0350   | 63,99  | 2177,02 | 3,22   | 65,28 | miotto:candidate_49A (8)  |
| 424081-424170  | Rv0353-Rv0354c  | 6,80   | 177,33  | 13,95  | 18,03 |                           |
| 447034-447173c | Rv0369c-Rv0370c | 1,75   | 25,85   | 0,00   | 1,78  |                           |
| 455341-455504c | Rv0377-Rv0378   | 2,98   | 18,11   | 0,00   | 2,28  |                           |
| 455857-455960c | Rv0378-Rv0379   | 11,76  | 27,66   | 1,01   | 1,20  |                           |
| 458308-458534c | Rv0382c-Rv0383c | 37,19  | 36,38   | 13,36  | 16,49 |                           |
| 474039-474192c | Rv0393-Rv0394c  | 44,49  | 6,63    | 12,22  | 3,24  |                           |
| 483827-483952  | Rv0403c-Rv0404  | 23,30  | 0,74    | 2,49   | 0,00  |                           |
| 494998-495098c | Rv0409-Rv0410c  | 2,42   | 9,19    | 1,04   | 0,00  |                           |
| 501049-501221  | Rv0414c-Rv0415  | 100,41 | 25,75   | 21,76  | 19,48 |                           |
| 505025-505107c | Rv0418-Rv0419   | 0,00   | 11,18   | 2,52   | 0,00  |                           |
| 510197-510260c | Rv0423c-Rv0424c | 22,94  | 4,35    | 1,63   | 1,95  |                           |
| 521458-521521  | Rv0433-Rv0434   | 3,82   | 2,90    | 17,98  | 0,00  |                           |

|                |                 |         |        |       |        |                           |
|----------------|-----------------|---------|--------|-------|--------|---------------------------|
| 522266-522341c | Rv0434-Rv0435c  | 4,83    | 12,21  | 2,75  | 1,64   |                           |
| 528426-528553  | Rv0439c-Rv0440  | 54,48   | 324,77 | 11,44 | 156,01 |                           |
| 530647-530818  | Rv0441c-Rv0442c | 10,67   | 38,84  | 4,86  | 3,63   |                           |
| 532290-532381  | Rv0442c-Rv0443  | 0,00    | 12,10  | 0,00  | 0,00   |                           |
| 532945-533051  | Rv0443-Rv0444c  | 8,00    | 9,54   | 13,68 | 1,17   |                           |
| 533715-533898c | Rv0444c-Rv0445c | 39,89   | 2,02   | 7,96  | 0,00   |                           |
| 541854-542068c | Rv0451c-Rv0452  | 6,83    | 52,22  | 0,49  | 1,16   |                           |
| 551667-551762c | Rv0459-Rv0460   | 2,55    | 11,60  | 5,45  | 1,30   |                           |
| 551947-552091  | Rv0460-Rv0461   | 26,15   | 8,96   | 5,77  | 2,58   |                           |
| 556411-556465  | Rv0465c-Rv0466  | 33,36   | 15,18  | 5,70  | 0,00   |                           |
| 560729-560803  | Rv0469-Rv0470c  | 40,78   | 4,95   | 22,31 | 0,00   |                           |
| 560769-560879c | Rv0469-Rv0470c  | 36,37   | 15,05  | 13,19 | 2,25   |                           |
| 561639-561788c | Rv0470c-Rv0470A | 30,99   | 19,80  | 12,55 | 4,99   |                           |
| 565500-565583  | Rv0474-Rv0475   | 16,02   | 43,08  | 1,25  | 0,00   |                           |
| 565634-565692  | Rv0474-Rv0475   | 22,81   | 75,49  | 1,77  | 2,12   |                           |
| 573876-573952  | Rv0484c-Rv0485  | 176,35  | 49,41  | 24,45 | 19,45  |                           |
| 595230-595440c | Rv0504c-Rv0505c | 60,88   | 11,43  | 17,35 | 7,10   |                           |
| 596662-596823  | Rv0505c-Rv0506  | 1078,36 | 36,66  | 43,26 | 3,08   | miotto:candidate_72A (8)  |
| 602706-602896  | Rv0510-Rv0511   | 70,45   | 21,86  | 62,42 | 9,15   |                           |
| 610149-610202  | Rv0517-Rv0518   | 6,80    | 17,18  | 0,00  | 0,00   |                           |
| 610941-611070c | Rv0518-Rv0519c  | 22,58   | 39,97  | 7,24  | 1,92   | miotto:candidate_74A* (8) |
| 612960-613045  | Rv0521-Rv0522   | 22,76   | 2,16   | 6,08  | 4,35   |                           |
| 614707-614789c | Rv0523c-Rv0524  | 20,63   | 0,00   | 6,30  | 0,00   |                           |
| 622259-622313  | Rv0530A-Rv0531  | 20,02   | 8,44   | 5,70  | 0,00   | miotto:candidate_75A (8)  |
| 622655-622746  | Rv0531-Rv0532   | 18,62   | 16,14  | 6,82  | 2,71   |                           |
| 629935-630089  | Rv0537c-Rv0538  | 25,26   | 16,76  | 6,75  | 4,03   |                           |
| 631477-631930c | Rv0538-Rv0539   | 42,57   | 73,58  | 13,13 | 7,42   |                           |
| 634311-634509c | Rv0541c-Rv0542c | 7,99    | 1,87   | 21,55 | 3,76   |                           |
| 654579-655096  | Rv0563-Rv0564c  | 20,31   | 127,19 | 9,69  | 1,93   |                           |
| 658191-658372  | Rv0566c-Rv0567  | 43,02   | 31,61  | 6,90  | 10,97  |                           |
| 664900-664988c | Rv0571c-Rv0572c | 20,62   | 0,00   | 1,18  | 1,40   |                           |
| 665433-665802c | Rv0572c-Rv0573c | 42,98   | 3,01   | 7,63  | 5,06   | miotto:candidate_79A* (8) |
| 668357-668550c | Rv0574c-Rv0575c | 16,40   | 10,52  | 11,86 | 5,15   |                           |
| 676068-676168  | Rv0578c-Rv0579  | 6,06    | 10,11  | 2,07  | 1,24   |                           |

|                |                 |        |        |       |       |                               |
|----------------|-----------------|--------|--------|-------|-------|-------------------------------|
| 678293-678378c | Rv0582-Rv0583c  | 9,96   | 1,08   | 18,24 | 0,00  |                               |
| 694774-694874  | Rv0594-Rv0595c  | 2,42   | 14,70  | 0,00  | 2,47  |                               |
| 696831-697197c | Rv0597c-Rv0598c | 32,00  | 0,25   | 8,55  | 0,68  |                               |
|                |                 |        |        |       |       | MTB000052,B55, arnvig:MTS0479 |
| 704302-704599  | Rv0609A-Rv0610c | 2,87   | 35,50  | 0,70  | 4,19  | (7)                           |
| 716284-716387c | Rv0622-Rv0623   | 0,00   | 22,31  | 0,00  | 6,00  |                               |
| 734052-734414  | Rv0638-Rv0639   | 120,31 | 84,87  | 34,57 | 19,60 | miotto:candidate_89A (8)      |
| 734843-735106  | Rv0639-Rv0640   | 102,41 | 78,38  | 20,60 | 15,60 |                               |
| 748081-748191  | Rv0650-Rv0651   | 56,21  | 7,52   | 12,25 | 12,37 | miotto:candidate_95A (8)      |
| 753386-753485  | Rv0656c-Rv0657c | 1,22   | 11,13  | 0,00  | 1,25  |                               |
| 754478-754558c | Rv0658c-Rv0659c | 15,10  | 6,87   | 15,49 | 0,00  |                               |
| 754601-754713c | Rv0658c-Rv0659c | 81,20  | 13,14  | 19,44 | 1,10  |                               |
| 759480-760051  | Rv0666-Rv0667   | 53,25  | 250,63 | 27,06 | 43,86 | miotto:candidate_96A (8)      |
| 767393-767496  | Rv0668-Rv0669c  | 4,71   | 11,60  | 18,10 | 4,80  |                               |
| 779469-779525  | Rv0678-Rv0679c  | 25,75  | 198,61 | 12,84 | 2,19  |                               |
| 780452-780563  | Rv0680c-Rv0681  | 0,00   | 14,08  | 0,00  | 1,11  |                               |
| 780633-780728  | Rv0680c-Rv0681  | 25,49  | 3,87   | 8,72  | 1,30  |                               |
| 781392-781518  | Rv0681-Rv0682   | 106,92 | 64,30  | 50,24 | 48,15 | miotto:candidate_99A (8)      |
| 782271-782565  | Rv0683-Rv0684   | 41,47  | 53,16  | 21,27 | 5,92  | miotto:candidate_101A (8)     |
| 784176-785068  | Rv0684-Rv0685   | 125,76 | 21,92  | 53,52 | 23,06 | miotto:candidate_102A (8)     |
| 786907-787178  | Rv0686-Rv0687   | 31,48  | 8,87   | 5,38  | 16,06 |                               |
| 789629-789777  | Rv0689c-Rv0690c | 13,14  | 14,32  | 2,81  | 12,56 |                               |
| 794471-794624  | Rv0694-Rv0695   | 21,45  | 15,67  | 13,58 | 4,05  |                               |
| 811044-811145  | Rv0713-Rv0714   | 4,80   | 14,56  | 1,03  | 0,00  |                               |
| 811263-811318  | Rv0713-Rv0714   | 21,85  | 18,23  | 9,34  | 2,23  |                               |
| 819676-819792  | Rv0726c-Rv0727c | 10,46  | 16,65  | 8,05  | 4,27  |                               |
| 827456-827546  | Rv0734-Rv0735   | 12,10  | 5,10   | 20,69 | 2,74  |                               |
| 828050-828151  | Rv0735-Rv0736   | 0,00   | 10,92  | 0,00  | 1,22  |                               |
| 831669-831793  | Rv0739-Rv0740   | 4,89   | 24,50  | 5,02  | 2,00  |                               |
| 833710-833975c | Rv0742-Rv0743c  | 4,60   | 14,65  | 0,39  | 1,88  |                               |
| 838389-838511  | Rv0746-Rv0747   | 70,62  | 47,53  | 44,22 | 30,44 |                               |
| 840848-840952  | Rv0747-Rv0748   | 0,00   | 14,14  | 0,00  | 2,38  |                               |
| 841932-842120c | Rv0749A-Rv0750  | 7,77   | 17,67  | 0,55  | 9,25  |                               |
| 846014-846266  | Rv0753c-Rv0754  | 2,90   | 127,63 | 0,83  | 5,92  |                               |

|                |                 |        |        |       |                                  |
|----------------|-----------------|--------|--------|-------|----------------------------------|
| 847865-848045c | Rv0754-Rv0755c  | 0,68   | 19,48  | 0,58  | 3,45                             |
| 851527-851628c | Rv0756c-Rv0757  | 0,00   | 12,74  | 0,00  | 2,45 miotto:candidate_112A* (8)  |
| 854193-854282c | Rv0759c-Rv0760c | 19,03  | 4,12   | 4,65  | 2,77                             |
| 888648-888749  | Rv0794c-Rv0795  | 2,40   | 20,92  | 1,03  | 1,22                             |
| 888682-888781c | Rv0794c-Rv0795  | 2,45   | 13,92  | 0,00  | 0,00                             |
| 888757-888861  | Rv0794c-Rv0795  | 0,00   | 16,79  | 0,00  | 5,94                             |
| 888887-888971  | Rv0794c-Rv0795  | 2,88   | 17,47  | 0,00  | 1,47                             |
| 901433-901631  | Rv0806c-Rv0807  | 0,00   | 17,72  | 0,00  | 1,88                             |
| 902066-902121c | Rv0807-Rv0808   | 0,00   | 16,57  | 0,00  | 0,00                             |
| 907966-908236c | Rv0813c-Rv0814c | 27,54  | 27,05  | 21,23 | 29,94                            |
| 909371-909507c | Rv0815c-Rv0816c | 18,75  | 11,51  | 4,58  | 3,64 miotto:candidate_119A* (8)  |
| 909435-909725  | Rv0815c-Rv0816c | 5,47   | 27,42  | 3,95  | 3,43 miotto:candidate_119A (8)   |
| 909511-909643c | Rv0815c-Rv0816c | 8,28   | 19,54  | 0,00  | 0,00 miotto:candidate_119A* (8)  |
| 913457-913643c | Rv0820-Rv0821c  | 30,09  | 5,95   | 12,86 | 0,67                             |
| 916281-916525c | Rv0822c-Rv0823c | 27,46  | 11,74  | 8,54  | 1,02                             |
| 917601-917798c | Rv0823c-Rv0824c | 279,27 | 146,22 | 64,44 | 20,80                            |
| 924288-924431  | Rv0831c-Rv0832  | 51,82  | 69,59  | 37,77 | 18,20                            |
| 924784-924916c | Rv0831c-Rv0832  | 0,92   | 18,84  | 0,00  | 0,94                             |
| 924895-924993  | Rv0831c-Rv0832  | 27,19  | 7,50   | 8,45  | 2,52                             |
| 927563-927982c | Rv0833-Rv0834c  | 34,66  | 28,06  | 12,45 | 13,08                            |
| 930544-930616  | Rv0834c-Rv0835  | 46,92  | 3,81   | 2,87  | 1,71                             |
| 930653-930717c | Rv0834c-Rv0835  | 0,00   | 18,56  | 0,00  | 0,00                             |
| 930831-930979  | Rv0834c-Rv0835  | 0,82   | 14,32  | 0,70  | 0,00                             |
| 931734-931835  | Rv0835-Rv0836c  | 1,20   | 11,83  | 0,00  | 0,00                             |
| 932021-932169c | Rv0835-Rv0836c  | 4,11   | 26,16  | 0,00  | 0,00                             |
| 932199-932288  | Rv0835-Rv0836c  | 19,03  | 4,12   | 4,65  | 0,00                             |
| 934068-934185  | Rv0837c-Rv0838  | 3,11   | 34,60  | 0,89  | 4,23                             |
| 934383-934491c | Rv0837c-Rv0838  | 2,24   | 23,84  | 0,00  | 4,58                             |
| 937259-937419c | Rv0840c-Rv0841  | 20,52  | 110,66 | 6,50  | 24,03                            |
| 937812-938240c | Rv0841-Rv0842   | 25,95  | 205,05 | 33,64 | 21,53 miotto:candidate_124A* (8) |
| 937825-937961  | Rv0841-Rv0842   | 24,11  | 16,93  | 0,00  | 2,73                             |
| 937965-938164  | Rv0841-Rv0842   | 13,46  | 14,38  | 0,00  | 13,73 miotto:candidate_124A (8)  |
| 944115-944303c | Rv0846c-Rv0847  | 13,59  | 36,33  | 3,87  | 5,28                             |
| 944208-944258  | Rv0846c-Rv0847  | 0,00   | 5,46   | 0,00  | 0,00                             |



|                  |                 |       |        |       |       |
|------------------|-----------------|-------|--------|-------|-------|
| 951558-951698    | Rv0854-Rv0855   | 45,98 | 26,98  | 7,42  | 0,89  |
| 965562-965799c   | Rv0867c-Rv0868c | 45,23 | 6,24   | 4,39  | 1,05  |
| 968287-968445c   | Rv0871-Rv0872c  | 6,16  | 14,59  | 1,97  | 3,92  |
| 972449-972538    | Rv0873-Rv0874c  | 2,72  | 17,53  | 4,65  | 1,39  |
| 978298-978392c   | Rv0878c-Rv0879c | 14,17 | 4,88   | 2,20  | 0,00  |
| 981349-981448c   | Rv0883c-Rv0884c | 7,34  | 13,92  | 3,14  | 1,25  |
| 986852-987008c   | Rv0887c-Rv0888  | 0,78  | 15,96  | 0,67  | 7,15  |
| 987062-987162c   | Rv0887c-Rv0888  | 29,07 | 13,78  | 1,04  | 2,47  |
| 1016151-1016226  | Rv0911-Rv0912   | 6,44  | 14,65  | 1,38  | 1,64  |
| 1021626-1021685c | Rv0916c-Rv0917  | 22,43 | 9,28   | 0,00  | 2,08  |
| 1021636-1021759  | Rv0916c-Rv0917  | 0,00  | 18,71  | 0,00  | 1,01  |
| 1021994-1022113  | Rv0916c-Rv0917  | 3,06  | 15,47  | 0,00  | 0,00  |
| 1024070-1024225  | Rv0917-Rv0918   | 0,78  | 19,63  | 1,34  | 4,00  |
| 1025150-1025320c | Rv0919-Rv0920c  | 31,48 | 25,50  | 12,84 | 15,33 |
| 1043171-1043415  | Rv0934-Rv0935   | 28,46 | 7,95   | 25,19 | 1,53  |
| 1050467-1050632c | Rv0939-Rv0940c  | 4,42  | 13,97  | 0,00  | 0,00  |
| 1051375-1051572c | Rv0940c-Rv0941c | 5,56  | 33,74  | 2,11  | 0,63  |
| 1052232-1052466c | Rv0941c-Rv0942  | 51,02 | 32,77  | 6,23  | 22,31 |
| 1061678-1061779  | Rv0950c-Rv0951  | 2,40  | 16,37  | 3,08  | 0,00  |
| 1065863-1066233  | Rv0954-Rv0955   | 52,10 | 15,26  | 20,58 | 9,76  |
| 1096526-1096622  | Rv0980c-Rv0981  | 0,00  | 18,18  | 0,00  | 0,00  |
| 1096609-1096748c | Rv0980c-Rv0981  | 2,62  | 18,56  | 0,00  | 0,89  |
| 1101462-1101665  | Rv0985c-Rv0986  | 1,80  | 24,11  | 3,08  | 3,06  |
| 1101666-1101864c | Rv0985c-Rv0986  | 1,84  | 14,92  | 1,58  | 0,00  |
| 1101686-1101786  | Rv0985c-Rv0986  | 2,42  | 12,86  | 0,00  | 0,00  |
| 1106174-1106454  | Rv0988-Rv0989c  | 20,90 | 13,21  | 5,21  | 0,89  |
| 1106251-1106352c | Rv0988-Rv0989c  | 0,00  | 18,19  | 0,00  | 0,00  |
| 1108114-1108176c | Rv0990c-Rv0991c | 23,30 | 303,41 | 0,00  | 23,77 |
| 1110087-1110322  | Rv0993-Rv0994   | 58,06 | 18,09  | 21,27 | 2,64  |
| 1113585-1113689  | Rv0996-Rv0997   | 17,48 | 17,67  | 3,98  | 2,38  |
| 1113861-1114199  | Rv0996-Rv0997   | 41,50 | 10,13  | 26,22 | 2,95  |
| 1114202-1114291  | Rv0996-Rv0997   | 36,70 | 14,43  | 17,43 | 1,39  |
| 1123591-1123823  | Rv1005c-Rv1006  | 33,60 | 39,43  | 31,42 | 18,75 |
| 1123634-1123702c | Rv1005c-Rv1006  | 1,77  | 14,79  | 0,00  | 0,00  |

miotto:candidate\_129A\* (8)

miotto:candidate\_137A (8)

|                  |                 |        |        |       |       |                           |
|------------------|-----------------|--------|--------|-------|-------|---------------------------|
| 1127893-1128192  | Rv1008-Rv1009   | 28,54  | 10,52  | 11,16 | 2,08  | miotto:candidate_140A (8) |
| 1134750-1134806  | Rv1015c-Rv1016c | 21,46  | 48,84  | 12,84 | 8,76  |                           |
| 1135422-1135522c | Rv1016c-Rv1017c | 48,45  | 4,59   | 12,43 | 2,47  |                           |
| 1138249-1138362  | Rv1018c-Rv1019  | 140,58 | 21,98  | 14,68 | 10,95 |                           |
| 1143678-1143760  | Rv1021-Rv1022   | 39,80  | 12,30  | 20,16 | 0,00  |                           |
| 1148068-1148171c | Rv1026-Rv1027c  | 1,18   | 21,41  | 5,03  | 4,80  |                           |
| 1160413-1160468  | Rv1036c-Rv1037c | 21,85  | 1,66   | 0,00  | 4,46  |                           |
| 1162440-1162610  | Rv1039c-Rv1040c | 10,02  | 28,76  | 2,45  | 3,65  |                           |
| 1163607-1163909  | Rv1040c-Rv1041c | 6,46   | 20,21  | 3,11  | 1,24  |                           |
| 1163959-1164051c | Rv1040c-Rv1041c | 0,00   | 12,97  | 0,00  | 0,00  |                           |
| 1164004-1164180  | Rv1040c-Rv1041c | 8,99   | 15,73  | 0,59  | 0,71  |                           |
| 1165566-1165623c | Rv1042c-Rv1043c | 25,31  | 22,40  | 30,66 | 8,61  |                           |
| 1166766-1166912c | Rv1043c-Rv1044  | 9,99   | 17,67  | 1,42  | 0,85  |                           |
| 1166993-1167079c | Rv1043c-Rv1044  | 0,00   | 20,26  | 0,00  | 0,00  |                           |
| 1172109-1172253  | Rv1048c-Rv1049  | 0,00   | 37,12  | 0,00  | 0,00  |                           |
| 1175103-1175156c | Rv1051c-Rv1052  | 22,65  | 0,00   | 1,94  | 0,00  |                           |
| 1175180-1175262  | Rv1051c-Rv1052  | 39,80  | 10,06  | 5,04  | 3,01  |                           |
| 1175670-1175763  | Rv1051c-Rv1052  | 57,26  | 30,60  | 4,45  | 19,92 |                           |
| 1176281-1176391  | Rv1053c-Rv1054  | 15,43  | 22,57  | 5,65  | 6,75  | arnvig:MTS0824 (7)        |
| 1176579-1176672  | Rv1053c-Rv1054  | 27,33  | 7,90   | 23,37 | 5,31  | arnvig:MTS0824 (7)        |
| 1176773-1176841  | Rv1053c-Rv1054  | 3,55   | 16,14  | 10,61 | 7,24  |                           |
| 1177349-1177421  | Rv1055-Rv1056   | 62,01  | 8,90   | 21,49 | 10,26 |                           |
| 1177547-1177625  | Rv1055-Rv1056   | 3,10   | 12,92  | 2,65  | 0,00  |                           |
| 1188359-1188472  | Rv1066-Rv1067c  | 1,07   | 0,00   | 3,67  | 25,18 |                           |
| 1200557-1200657  | Rv1075c-Rv1076  | 29,07  | 5,51   | 12,43 | 0,00  | miotto:candidate_149A (8) |
| 1203141-1203260c | Rv1077-Rv1078   | 17,33  | 27,84  | 2,61  | 5,20  |                           |
| 1203948-1204161  | Rv1078-Rv1079   | 68,60  | 2,17   | 32,75 | 0,58  |                           |
| 1205717-1205921c | Rv1080c-Rv1081c | 53,11  | 284,26 | 30,61 | 24,96 |                           |
| 1211409-1211600  | Rv1086-Rv1087   | 23,58  | 20,30  | 2,18  | 6,50  |                           |
| 1214375-1214476  | Rv1087A-Rv1088  | 0,00   | 11,83  | 0,00  | 0,00  |                           |
|                  |                 |        |        |       |       | MTB000074,ncRNA:RVnc0034, |
| 1220399-1220469c | Rv1092c-Rv1093  | 32,74  | 3,92   | 22,10 | 14,06 | arnvig:MTS0858 (7)        |
| 1222844-1223097  | Rv1094-Rv1095   | 35,16  | 18,27  | 39,12 | 9,83  |                           |
| 1230551-1230641c | Rv1101c-Rv1102c | 13,44  | 10,20  | 9,19  | 2,74  |                           |

|                  |                 |        |        |        |       |                                                                           |
|------------------|-----------------|--------|--------|--------|-------|---------------------------------------------------------------------------|
| 1232042-1232101c | Rv1104-Rv1105   | 0,00   | 17,01  | 1,74   | 0,00  |                                                                           |
| 1232124-1232230c | Rv1104-Rv1105   | 4,57   | 13,88  | 5,86   | 3,50  |                                                                           |
| 1237027-1237388  | Rv1110-Rv1111c  | 11,49  | 29,48  | 50,56  | 6,90  |                                                                           |
| 1242827-1242877  | Rv1118c-Rv1119c | 4,80   | 14,56  | 0,00   | 2,45  |                                                                           |
| 1261282-1261692c | Rv1133c-Rv1134  | 192,58 | 12,42  | 105,10 | 35,83 | miotto:candidate_155A* (8)                                                |
| 1264083-1264184  | Rv1135c-Rv1135A | 1,20   | 17,28  | 0,00   | 0,00  |                                                                           |
| 1264131-1264290c | Rv1135c-Rv1135A | 13,00  | 20,30  | 1,96   | 0,00  |                                                                           |
| 1266873-1267107c | Rv1139c-Rv1140  | 16,66  | 22,11  | 4,01   | 4,78  |                                                                           |
| 1267276-1267375  | Rv1139c-Rv1140  | 35,48  | 8,35   | 3,14   | 3,74  |                                                                           |
| 1271812-1272168c | Rv1144-Rv1145   | 58,94  | 217,29 | 61,52  | 38,81 | arnvig:MTS0900<br>arnvig:MTS0903 (7);                                     |
| 1275452-1275819c | Rv1147-Rv1148c  | 5,32   | 21,68  | 2,27   | 6,44  | miotto:candidate_157A* (8)                                                |
| 1275823-1275956c | Rv1147-Rv1148c  | 24,65  | 55,40  | 16,39  | 11,18 | arnvig:MTS0903                                                            |
| 1276227-1276310c | Rv1147-Rv1148c  | 5,83   | 14,36  | 0,00   | 4,46  | miotto:candidate_158A* (8)                                                |
| 1281837-1281921  | Rv1155-Rv1156   | 48,93  | 17,47  | 14,77  | 2,94  |                                                                           |
| 1282030-1282226  | Rv1155-Rv1156   | 78,87  | 8,48   | 10,09  | 5,07  | miotto:candidate_159*A (8)                                                |
| 1282638-1283155  | Rv1156-Rv1157c  | 197,44 | 33,50  | 34,93  | 4,82  | miotto:candidate_160A (8)                                                 |
| 1287124-1287249  | Rv1160-Rv1161   | 77,67  | 25,04  | 56,44  | 12,88 | miotto:candidate_161A (8)                                                 |
| 1290973-1291120  | Rv1161-Rv1162   | 34,72  | 81,51  | 21,91  | 29,52 |                                                                           |
| 1292720-1292843  | Rv1162-Rv1163   | 18,74  | 7,48   | 26,15  | 6,04  |                                                                           |
| 1297979-1298190c | Rv1166-Rv1167c  | 2,31   | 21,88  | 0,99   | 0,00  |                                                                           |
| 1301226-1301320  | Rv1170-Rv1171   | 50,22  | 14,65  | 12,11  | 2,63  | miotto:candidate_164A (8)                                                 |
| 1305906-1306173c | Rv1174c-Rv1175c | 49,30  | 120,14 | 56,98  | 26,08 |                                                                           |
| 1327518-1327679  | Rv1185c-Rv1186c | 15,86  | 13,17  | 4,52   | 4,62  |                                                                           |
| 1327608-1327706c | Rv1185c-Rv1186c | 0,00   | 13,12  | 1,06   | 1,26  |                                                                           |
| 1334813-1334906  | Rv1191-Rv1192   | 9,11   | 9,87   | 2,23   | 0,00  |                                                                           |
| 1338748-1338828c | Rv1194c-Rv1195  | 0,00   | 11,46  | 0,00   | 3,08  |                                                                           |
| 1338900-1339089  | Rv1194c-Rv1195  | 102,38 | 0,98   | 63,30  | 3,28  | miotto:candidate_174A (8)                                                 |
| 1340371-1340729  | Rv1196-Rv1197   | 419,14 | 10,60  | 102,26 | 4,52  | MTB000075,ncrMT1234,ncRNA:RVn<br>c0041<br>mobile_element:mobile_element13 |
| 1342591-1342864  | Rv1199c-Rv1200  | 16,97  | 33,53  | 3,44   | 10,02 | *; miotto:candidate_175A (8)                                              |
| 1353022-1353256  | Rv1208-Rv1209   | 56,22  | 6,71   | 28,93  | 6,90  |                                                                           |
| 1363390-1363453  | Rv1219c-Rv1220c | 21,03  | 1,45   | 1,63   | 0,00  |                                                                           |

| MTB000062,mpr6,ncRNA:RVnc0033                                                                  |                 |         |         |        |          |
|------------------------------------------------------------------------------------------------|-----------------|---------|---------|--------|----------|
| 1364871-1365569                                                                                | Rv1221-Rv1222   | 62,13   | 448,69  | 19,15  | 30,53 a  |
| 1368585-1368913                                                                                | Rv1225c-Rv1226c | 4,46    | 20,87   | 0,00   | 3,79     |
| 1370708-1371064                                                                                | Rv1227c-Rv1228  | 14,39   | 48,09   | 0,29   | 18,18    |
| 1371460-1371597                                                                                | Rv1228-Rv1229c  | 4,43    | 18,15   | 0,00   | 3,62     |
| 1371629-1371733c                                                                               | Rv1228-Rv1229c  | 92,04   | 55,67   | 26,89  | 7,13     |
| 1374142-1374430c                                                                               | Rv1230c-Rv1231c | 152,81  | 13,49   | 24,97  | 2,59     |
| 1376124-1376227                                                                                | Rv1232c-Rv1233c | 0,00    | 16,06   | 0,00   | 0,00     |
| 1376805-1376901                                                                                | Rv1233c-Rv1234  | 1,26    | 13,39   | 0,00   | 2,57     |
| 1377459-1377554                                                                                | Rv1234-Rv1235   | 39,50   | 10,63   | 6,54   | 3,90     |
| 1389205-1389323c                                                                               | Rv1247c-Rv1248c | 2,06    | 17,15   | 0,88   | 1,05     |
| 1409338-1409463                                                                                | Rv1260-Rv1261c  | 12,62   | 20,62   | 3,32   | 1,98     |
| 1410359-1410426                                                                                | Rv1262c-Rv1263  | 0,00    | 20,47   | 0,00   | 3,67     |
| MTB000063,ncRNA:RVnc0013,arnvi<br>g:MTS0997 (7); Dichiar2:Mcr11;<br>miotto:candidate_185A* (8) |                 |         |         |        |          |
| 1412981-1413227c                                                                               | Rv1264-Rv1265   | 1836,51 | 1207,04 | 803,26 | 25523,10 |
| 1424047-1424312                                                                                | Rv1273c-Rv1274  | 467,26  | 66,63   | 93,97  | 18,30    |
| 1437164-1437243c                                                                               | Rv1283c-Rv1284  | 0,00    | 16,24   | 0,00   | 0,00     |
| 1437266-1437366c                                                                               | Rv1283c-Rv1284  | 0,00    | 11,94   | 0,00   | 1,24     |
| 1440716-1440877                                                                                | Rv1286-Rv1287   | 12,84   | 104,25  | 2,58   | 21,57    |
| 1451879-1451930                                                                                | Rv1295-Rv1296   | 14,12   | 1,78    | 30,17  | 2,40     |
| 1453065-1453152                                                                                | Rv1296-Rv1297   | 6,95    | 59,05   | 14,26  | 2,84     |
| 1453157-1453221                                                                                | Rv1296-Rv1297   | 24,47   | 231,26  | 11,26  | 9,60     |
| 1458143-1458417                                                                                | Rv1301-Rv1302   | 14,68   | 17,88   | 12,93  | 1,36     |
| 1459572-1459815                                                                                | Rv1302-Rv1303   | 26,57   | 29,66   | 13,72  | 2,56     |
| 1460931-1461156                                                                                | Rv1304-Rv1305   | 392,45  | 35,31   | 106,44 | 6,63     |
| 1461233-1461354                                                                                | Rv1305-Rv1306   | 77,21   | 16,73   | 18,00  | 0,00     |
| 1465715-1465941                                                                                | Rv1309-Rv1310   | 27,48   | 7,77    | 33,63  | 3,30     |
| mobile_element:mobile_element14                                                                |                 |         |         |        |          |
| 1469510-1469576                                                                                | Rv1313c-Rv1314c | 1,83    | 13,85   | 10,93  | 139,71 * |
| 1480830-1480924                                                                                | Rv1318c-Rv1319c | 2,58    | 15,63   | 1,10   | 9,20     |
| 1485174-1485386c                                                                               | Rv1322-Rv1322A  | 44,80   | 27,01   | 33,88  | 5,27     |
| 1485793-1485926                                                                                | Rv1322A-Rv1323  | 132,38  | 118,41  | 29,66  | 17,70    |
| 1486991-1487135                                                                                | Rv1323-Rv1324   | 51,47   | 22,40   | 30,29  | 3,44     |

|                  |                 |        |       |       |       |                                                            |
|------------------|-----------------|--------|-------|-------|-------|------------------------------------------------------------|
| 1489934-1490040c | Rv1325c-Rv1326c | 16,01  | 12,14 | 10,75 | 9,33  |                                                            |
| 1518665-1518798  | Rv1351-Rv1352   | 101,34 | 29,78 | 47,61 | 12,11 |                                                            |
| 1526332-1526395  | Rv1357c-Rv1358  | 19,11  | 1,45  | 4,90  | 1,95  |                                                            |
| 1535603-1535667  | Rv1363c-Rv1364c | 11,29  | 2,86  | 4,83  | 26,88 | MTB000065,ncRNA:RVnc0015*;<br>Dichiara:Mcr15*              |
| 1539401-1539485  | Rv1366A-Rv1367c | 105,06 | 22,92 | 52,91 | 22,03 |                                                            |
| 1540818-1540914  | Rv1367c-Rv1368  | 27,75  | 7,65  | 14,02 | 1,29  |                                                            |
| 1547507-1547846  | Rv1374c-Rv1375  | 64,41  | 84,06 | 4,31  | 6,97  | MTB000076,arnvig:MTS1082 (7);<br>miotto:candidate_204A (8) |
| 1561326-1561387c | Rv1385-Rv1386   | 21,70  | 14,97 | 15,18 | 2,01  |                                                            |
| 1561401-1561505  | Rv1385-Rv1386   | 24,47  | 23,86 | 5,98  | 0,00  | miotto:candidate_205A (8)                                  |
| 1563304-1563604  | Rv1387-Rv1388   | 36,17  | 50,25 | 8,69  | 3,73  |                                                            |
| 1563628-1563749  | Rv1387-Rv1388   | 1,00   | 19,78 | 0,00  | 2,05  |                                                            |
| 1564285-1564382  | Rv1388-Rv1389   | 530,53 | 12,31 | 73,64 | 21,65 |                                                            |
| 1566498-1567079  | Rv1391-Rv1392   | 59,91  | 99,01 | 42,41 | 11,58 |                                                            |
| 1570992-1571093c | Rv1394c-Rv1395  | 0,00   | 10,01 | 0,00  | 2,45  |                                                            |
| 1589261-1589378  | Rv1412-Rv1413   | 14,51  | 14,15 | 3,55  | 1,06  |                                                            |
| 1607935-1608035c | Rv1430-Rv1431   | 49,66  | 5,51  | 2,07  | 1,24  |                                                            |
| 1611332-1611393  | Rv1432-Rv1433   | 0,00   | 16,46 | 1,69  | 2,01  |                                                            |
| 1616880-1616984c | Rv1438-Rv1439c  | 0,00   | 22,98 | 0,00  | 1,19  |                                                            |
| 1619658-1619757c | Rv1441c-Rv1442  | 0,00   | 14,85 | 0,00  | 1,25  |                                                            |
| 1622135-1622197  | Rv1442-Rv1443c  | 1,94   | 17,67 | 6,64  | 1,98  |                                                            |
| 1653601-1653720  | Rv1466-Rv1467c  | 15,29  | 28,61 | 11,33 | 17,68 |                                                            |
| 1655441-1655612c | Rv1467c-Rv1468c | 2,13   | 11,87 | 0,61  | 2,90  |                                                            |
| 1659730-1659782  | Rv1471-Rv1472   | 4,62   | 12,26 | 1,97  | 7,06  |                                                            |
| 1666924-1667003  | Rv1476-Rv1477   | 12,23  | 6,96  | 17,00 | 0,00  |                                                            |
| 1669138-1669240  | Rv1478-Rv1479   | 22,57  | 9,01  | 7,11  | 2,42  |                                                            |
| 1678495-1678595c | Rv1488-Rv1489   | 1,21   | 22,05 | 2,07  | 2,47  |                                                            |
| 1678831-1679036  | Rv1489-Rv1489A  | 31,47  | 50,00 | 36,05 | 6,06  |                                                            |
| 1680684-1680845  | Rv1490-Rv1491c  | 70,98  | 33,22 | 18,08 | 17,72 |                                                            |
| 1680867-1680975c | Rv1490-Rv1491c  | 0,00   | 22,13 | 0,00  | 1,15  |                                                            |
| 1689956-1690057c | Rv1498c-Rv1498A | 1,20   | 13,65 | 0,00  | 0,00  |                                                            |
| 1690771-1690877c | Rv1499-Rv1500   | 10,29  | 18,21 | 2,93  | 1,17  |                                                            |
| 1692553-1692963  | Rv1501-Rv1502   | 25,30  | 16,48 | 12,72 | 3,95  |                                                            |

|                  |                 |       |        |       |        |                                                       |
|------------------|-----------------|-------|--------|-------|--------|-------------------------------------------------------|
| 1693899-1693977c | Rv1502-Rv1503c  | 4,65  | 12,92  | 0,00  | 1,58   |                                                       |
| 1702613-1702761c | Rv1510-Rv1511   | 15,60 | 11,21  | 13,34 | 2,51   | arnvig:MTS1180 (7)                                    |
| 1714089-1714177  | Rv1521-Rv1522c  | 15,12 | 8,34   | 12,93 | 2,80   |                                                       |
| 1728726-1728925c | Rv1527c-Rv1528c | 4,28  | 30,16  | 2,61  | 3,12   |                                                       |
| 1735426-1735637  | Rv1534-Rv1535   | 19,62 | 38,52  | 13,32 | 27,67  |                                                       |
| 1735662-1735983  | Rv1534-Rv1535   | 59,65 | 171,17 | 38,00 | 121,32 | miotto:candidate_224A (8)                             |
| 1757528-1757623  | Rv1551-Rv1552   | 7,65  | 10,63  | 8,72  | 0,00   |                                                       |
| 1775156-1775255  | Rv1567c-Rv1568  | 11,01 | 10,21  | 5,23  | 2,50   |                                                       |
| 1782540-1782647c | Rv1577c-Rv1578c | 3,40  | 14,61  | 5,81  | 11,56  |                                                       |
| 1789792-1790094  | Rv1588c-Rv1589  | 1,61  | 28,48  | 0,00  | 0,82   |                                                       |
| 1790144-1790371  | Rv1588c-Rv1589  | 20,93 | 40,70  | 8,26  | 3,28   |                                                       |
| 1792231-1792441  | Rv1591-Rv1592c  | 5,22  | 22,43  | 3,47  | 0,59   |                                                       |
| 1793621-1794131c | Rv1592c-Rv1593c | 19,15 | 71,00  | 1,84  | 3,66   | miotto:candidate_229A* (8)                            |
| 1793895-1793998  | Rv1592c-Rv1593c | 2,35  | 21,41  | 0,00  | 0,00   |                                                       |
| 1798239-1798317  | Rv1596-Rv1597   | 17,03 | 27,02  | 9,27  | 0,00   |                                                       |
| 1798970-1799172c | Rv1597-Rv1598c  | 23,50 | 26,97  | 15,46 | 4,92   |                                                       |
| 1803258-1803319  | Rv1602-Rv1603   | 19,73 | 0,00   | 3,37  | 2,01   |                                                       |
| 1806060-1806221  | Rv1606-Rv1607   | 2,27  | 21,19  | 1,94  | 3,85   |                                                       |
| 1810006-1810332  | Rv1610-Rv1611   | 63,23 | 12,20  | 59,81 | 4,58   |                                                       |
| 1815125-1815238  | Rv1614-Rv1615   | 2,15  | 18,72  | 0,92  | 0,00   |                                                       |
| 1816016-1816161  | Rv1616-Rv1617   | 21,79 | 6,99   | 12,89 | 5,98   |                                                       |
| 1834585-1835429  | Rv1630-Rv1631   | 54,15 | 13,40  | 35,28 | 8,71   |                                                       |
| 1836249-1836299  | Rv1631-Rv1632c  | 16,79 | 3,64   | 4,10  | 4,89   |                                                       |
| 1836782-1836891c | Rv1632c-Rv1633  | 5,56  | 21,09  | 1,90  | 6,81   |                                                       |
| 1836894-1836990  | Rv1632c-Rv1633  | 6,31  | 18,18  | 2,16  | 5,15   |                                                       |
| 1842388-1842489  | Rv1635c-Rv1636  | 19,19 | 16,37  | 5,13  | 0,00   | miotto:candidate_236A (8)                             |
| 1851989-1852420  | Rv1640c-Rv1641  | 86,94 | 18,26  | 25,66 | 59,80  | miotto:candidate_237A (8)                             |
| 1855666-1855846  | Rv1645c-Rv1646  | 87,19 | 25,12  | 37,56 | 15,17  | miotto:candidate_240A (8)                             |
| 1862232-1862285c | Rv1650-Rv1651c  | 0,00  | 13,75  | 0,00  | 0,00   |                                                       |
|                  |                 |       |        |       |        | MTB000054,G2,ncRNA:RVnc0010*,<br>arnvig:MTS1310* (7); |
| 1914863-1915135  | Rv1689-Rv1690   | 24,20 | 5,78   | 7,28  | 0,00   | miotto:candidate_243A (8)                             |
| 1923669-1923721  | Rv1698-Rv1699   | 30,01 | 17,51  | 3,95  | 0,00   |                                                       |
| 1934127-1934262  | Rv1706c-Rv1706A | 38,68 | 138,50 | 0,77  | 12,85  |                                                       |

|                  |                 |        |        |       |        |                                 |
|------------------|-----------------|--------|--------|-------|--------|---------------------------------|
| 1934799-1934944  | Rv1706A-Rv1707  | 37,71  | 54,66  | 22,92 | 3,42   |                                 |
| 1946370-1946475  | Rv1719-Rv1720c  | 27,70  | 21,01  | 0,00  | 2,35   |                                 |
| 1946938-1946993c | Rv1719-Rv1720c  | 2,18   | 19,88  | 3,74  | 0,00   |                                 |
| 1953213-1953306  | Rv1726-Rv1727   | 0,00   | 9,87   | 0,00  | 0,00   |                                 |
| 1957449-1957535  | Rv1730c-Rv1731  | 8,44   | 16,00  | 0,00  | 0,00   |                                 |
|                  |                 |        |        |       |        | MTB000077,arnvig:MTS1338 (7);   |
| 1960916-1961280  | Rv1734c-Rv1735c | 8,71   | 324,39 | 17,77 | 68,39  | miotto:candidate_245A (8)       |
| 1965327-1965428c | Rv1737c-Rv1738  | 59,97  | 10,01  | 95,36 | 9,79   |                                 |
| 1965475-1965573c | Rv1737c-Rv1738  | 6,18   | 14,06  | 2,11  | 0,00   |                                 |
| 1976201-1976356  | Rv1747-Rv1748   | 11,76  | 7,14   | 8,72  | 2,40   |                                 |
| 1992606-1992706c | Rv1759c-Rv1760  | 0,00   | 11,02  | 0,00  | 3,71   |                                 |
|                  |                 |        |        |       |        | mobile_element:mobile_element18 |
| 1998943-1999243  | Rv1765c-Rv1765A | 36,99  | 18,80  | 7,30  | 3,32   | *                               |
| 2000513-2000625  | Rv1767-Rv1768   | 30,31  | 112,50 | 5,55  | 6,63   |                                 |
| 2006496-2006704  | Rv1771-Rv1772   | 5,85   | 8,88   | 22,02 | 6,57   |                                 |
| 2011984-2012047  | Rv1777-Rv1778c  | 13,38  | 14,50  | 1,63  | 1,95   |                                 |
| 2012491-2012681c | Rv1778c-Rv1779c | 29,46  | 24,78  | 9,86  | 9,15   |                                 |
| 2014528-2014628c | Rv1779c-Rv1780  | 3,63   | 16,54  | 0,00  | 2,47   |                                 |
| 2030222-2030275  | Rv1791-Rv1793   | 172,18 | 12,03  | 7,75  | 18,49  | miotto:candidate_255A (8)       |
| 2030286-2030397  | Rv1791-Rv1793   | 208,63 | 142,50 | 42,96 | 57,95  | miotto:candidate_256A (8)       |
| 2031789-2032311  | Rv1794-Rv1795   | 22,69  | 31,23  | 13,00 | 12,17  |                                 |
| 2039096-2039219  | Rv1798-Rv1799   | 69,06  | 15,71  | 16,87 | 7,05   |                                 |
| 2039400-2039497  | Rv1799-Rv1800   | 19,97  | 10,42  | 14,94 | 11,46  |                                 |
| 2041437-2041559  | Rv1800-Rv1801   | 0,99   | 15,84  | 0,85  | 0,00   |                                 |
| 2043255-2043365  | Rv1801-Rv1802   | 18,74  | 33,44  | 0,00  | 31,48  |                                 |
| 2046929-2047017c | Rv1803c-Rv1804c | 17,87  | 4,17   | 1,18  | 1,40   |                                 |
| 2047414-2047726  | Rv1804c-Rv1805c | 179,79 | 160,68 | 32,08 | 183,43 |                                 |
| 2047995-2048101  | Rv1805c-Rv1806  | 22,87  | 805,64 | 0,00  | 64,15  |                                 |
| 2049665-2050053  | Rv1807-Rv1808   | 15,72  | 449,88 | 0,81  | 57,43  |                                 |
| 2051101-2051244  | Rv1808-Rv1809   | 30,58  | 148,85 | 3,63  | 50,27  |                                 |
| 2052697-2052904  | Rv1809-Rv1810   | 28,82  | 118,67 | 11,06 | 25,80  | miotto:candidate_260A (8)       |
| 2053150-2053534  | Rv1810-Rv1811   | 11,76  | 34,95  | 5,98  | 10,37  |                                 |
| 2055298-2055530c | Rv1812c-Rv1813c | 28,35  | 7,96   | 21,10 | 3,21   | miotto:candidate_262A* (8)      |
| 2055366-2055634  | Rv1812c-Rv1813c | 2,73   | 41,39  | 0,78  | 4,64   | miotto:candidate_262A (8)       |

|                  |                 |        |        |        |        |                           |
|------------------|-----------------|--------|--------|--------|--------|---------------------------|
| 2055619-2055720c | Rv1812c-Rv1813c | 15,59  | 16,37  | 29,74  | 0,00   |                           |
| 2055929-2056299  | Rv1813c-Rv1814  | 18,47  | 48,02  | 2,26   | 16,82  | miotto:candidate_263A (8) |
| 2056157-2056331c | Rv1813c-Rv1814  | 23,77  | 16,44  | 130,29 | 4,99   |                           |
| 2057445-2057539  | Rv1814-Rv1815   | 2,58   | 10,74  | 3,30   | 0,00   |                           |
| 2059150-2059275c | Rv1816-Rv1817   | 0,00   | 23,57  | 0,00   | 1,98   |                           |
| 2062616-2062775c | Rv1818c-Rv1819c | 75,69  | 6,38   | 22,23  | 3,90   |                           |
| 2070597-2070689  | Rv1823-Rv1824   | 22,36  | 13,97  | 6,75   | 1,34   |                           |
| 2072318-2072810  | Rv1826-Rv1827   | 403,98 | 156,22 | 101,62 | 36,20  | miotto:candidate_265A (8) |
| 2073833-2074031  | Rv1828-Rv1829   | 37,50  | 6,06   | 40,47  | 10,03  |                           |
| 2074703-2074790c | Rv1829-Rv1830   | 1,39   | 18,98  | 1,19   | 0,00   |                           |
| 2078385-2079061  | Rv1832-Rv1833c  | 16,26  | 24,81  | 11,90  | 6,45   |                           |
| 2084549-2084892c | Rv1836c-Rv1837c | 49,43  | 6,74   | 65,67  | 2,18   |                           |
| 2089565-2089619c | Rv1840c-Rv1841c | 8,90   | 16,87  | 3,80   | 2,27   |                           |
| 2092117-2092261c | Rv1842c-Rv1843c | 22,78  | 30,72  | 76,46  | 6,03   |                           |
| 2096649-2096798c | Rv1846c-Rv1847  | 2,45   | 30,31  | 0,70   | 2,50   |                           |
| 2096766-2096828  | Rv1846c-Rv1847  | 15,53  | 1,47   | 9,96   | 51,51  | miotto:candidate_268A (8) |
| 2104793-2104885c | Rv1856c-Rv1857  | 64,46  | 5,99   | 11,25  | 10,74  |                           |
| 2104920-2105021  | Rv1856c-Rv1857  | 95,95  | 19,10  | 39,99  | 12,24  |                           |
| 2108991-2109083c | Rv1860-Rv1861   | 22,36  | 2,99   | 2,25   | 1,34   |                           |
| 2109436-2109580  | Rv1861-Rv1862   | 31,22  | 15,36  | 10,82  | 3,44   |                           |
| 2120728-2120797c | Rv1869c-Rv1870c | 6,99   | 22,54  | 16,44  | 5,35   |                           |
| 2121742-2122033c | Rv1871c-Rv1872c | 445,77 | 231,34 | 595,30 | 108,14 |                           |
| 2131785-2131955c | Rv1880c-Rv1881c | 61,53  | 14,65  | 31,19  | 4,38   |                           |
| 2132280-2132402c | Rv1881c-Rv1882c | 45,75  | 9,81   | 20,41  | 2,03   |                           |
| 2133158-2133264c | Rv1882c-Rv1883c | 78,89  | 26,88  | 21,50  | 2,33   |                           |
| 2134834-2134929c | Rv1885c-Rv1886c | 76,46  | 7,73   | 16,34  | 5,20   |                           |
| 2136149-2136294  | Rv1886c-Rv1887  | 43,57  | 8,90   | 26,51  | 5,98   | miotto:candidate_273A (8) |
| 2137393-2137489  | Rv1887-Rv1888c  | 10,09  | 17,22  | 18,33  | 10,29  |                           |
| 2138272-2138472  | Rv1888c-Rv1888A | 8,52   | 17,54  | 0,52   | 7,45   |                           |
| 2140706-2140765  | Rv1893-Rv1894c  | 10,19  | 13,92  | 0,00   | 0,00   |                           |
| 2141942-2142107  | Rv1894c-Rv1895  | 0,00   | 22,36  | 0,00   | 4,51   |                           |
| 2142257-2142331c | Rv1894c-Rv1895  | 24,47  | 8,66   | 6,97   | 1,66   |                           |
| 2152290-2152518c | Rv1905c-Rv1906c | 137,29 | 53,89  | 47,96  | 15,81  |                           |
| 2153134-2153186c | Rv1906c-Rv1907c | 2,31   | 17,51  | 3,95   | 2,35   |                           |



|                  |                 |        |       |       |                                  |
|------------------|-----------------|--------|-------|-------|----------------------------------|
| 2157312-2157390  | Rv1910c-Rv1911c | 1,55   | 11,75 | 0,00  | 0,00                             |
| 2162731-2162848  | Rv1916-Rv1917c  | 48,73  | 11,01 | 30,14 | 12,69                            |
| 2162861-2162963  | Rv1916-Rv1917c  | 3,56   | 18,92 | 6,09  | 1,21                             |
| 2171003-2171098c | Rv1918c-Rv1919c | 99,40  | 10,63 | 54,47 | 6,50                             |
| 2179533-2179583  | Rv1926c-Rv1927  | 0,00   | 18,19 | 47,17 | 0,00                             |
| 2204716-2204846c | Rv1961-Rv1962c  | 12,14  | 9,92  | 2,40  | 0,95                             |
| 2205516-2205609  | Rv1962A-Rv1963c | 2,60   | 14,81 | 0,00  | 0,00                             |
| 2206545-2207452c | Rv1963c-Rv1964  | 6,74   | 34,44 | 0,81  | 0,96                             |
| 2207130-2207229  | Rv1963c-Rv1964  | 0,00   | 10,21 | 0,00  | 0,00                             |
| 2207629-2207729  | Rv1963c-Rv1964  | 1,21   | 23,89 | 1,04  | 1,24                             |
| 2219179-2219516c | Rv1976c-Rv1977  | 36,19  | 18,67 | 15,16 | 7,02                             |
| 2219571-2219718  | Rv1976c-Rv1977  | 20,66  | 28,21 | 12,01 | 0,84                             |
| 2220801-2220961  | Rv1977-Rv1978   | 5,32   | 19,02 | 7,15  | 1,55                             |
| 2223240-2223438c | Rv1979c-Rv1980c | 59,02  | 46,63 | 43,10 | 19,44                            |
| 2224035-2224263  | Rv1980c-Rv1981c | 1,60   | 32,01 | 0,00  | 3,27 miotto:candidate_282A (8)   |
| 2225272-2225372c | Rv1981c-Rv1982c | 3,63   | 12,86 | 0,00  | 1,24 miotto:candidate_283A* (8)  |
| 2228665-2228722c | Rv1984c-Rv1985c | 0,00   | 16,00 | 0,00  | 0,00                             |
| 2228802-2228908c | Rv1984c-Rv1985c | 0,00   | 32,09 | 0,98  | 1,17                             |
| 2228907-2229018  | Rv1984c-Rv1985c | 40,41  | 37,28 | 9,34  | 6,69                             |
| 2230462-2231140  | Rv1986-Rv1987   | 7,75   | 43,73 | 0,62  | 4,96                             |
| 2231469-2231663  | Rv1987-Rv1988   | 23,84  | 17,13 | 35,94 | 9,60                             |
| 2232311-2232404  | Rv1988-Rv1989c  | 22,12  | 10,86 | 3,34  | 1,33                             |
| 2232543-2232665c | Rv1988-Rv1989c  | 8,95   | 57,33 | 3,40  | 32,47                            |
| 2232676-2232754c | Rv1988-Rv1989c  | 1,55   | 4,70  | 0,00  | 36,34 miotto:candidate_286A* (8) |
| 2234174-2234344  | Rv1990A-Rv1991c | 1,43   | 17,91 | 0,00  | 1,46                             |
| 2234916-2235017c | Rv1991A-Rv1992c | 17,99  | 16,37 | 2,05  | 0,00                             |
| 2238007-2238075  | Rv1994c-Rv1995  | 1,77   | 14,79 | 0,00  | 0,00                             |
| 2239993-2240177  | Rv1996-Rv1997   | 18,52  | 18,06 | 13,57 | 20,24                            |
| 2247582-2247706  | Rv2001-Rv2002   | 37,19  | 5,20  | 3,35  | 1,00                             |
| 2251804-2251978c | Rv2005c-Rv2006  | 93,67  | 12,73 | 28,69 | 24,96                            |
| 2255955-2256084c | Rv2006-Rv2007c  | 185,38 | 5,00  | 20,11 | 22,08                            |
| 2258745-2258875  | Rv2010-Rv2011c  | 0,93   | 29,04 | 3,19  | 4,76                             |
| 2259655-2260339  | Rv2012-Rv2013   | 0,36   | 50,53 | 0,00  | 0,55                             |
| 2265109-2265349  | Rv2017-Rv2018   | 9,64   | 22,72 | 4,77  | 4,66                             |

|                  |                 |        |       |        |                                                         |
|------------------|-----------------|--------|-------|--------|---------------------------------------------------------|
| 2266727-2266802c | Rv2020c-Rv2021c | 6,44   | 18,31 | 0,00   | 4,93                                                    |
| 2270320-2270421c | Rv2024c-Rv2025c | 1,20   | 13,65 | 0,00   | 0,00                                                    |
| 2271677-2271826c | Rv2025c-Rv2026c | 13,86  | 29,69 | 0,70   | 0,00                                                    |
| 2280058-2280263  | Rv2032-Rv2033c  | 43,35  | 16,22 | 17,77  | 31,51                                                   |
| 2281145-2281208c | Rv2033c-Rv2034  | 0,00   | 8,70  | 0,00   | 1,95                                                    |
| 2307078-2307131c | Rv2048c-Rv2049c | 6,80   | 0,00  | 19,37  | 0,00                                                    |
| 2313918-2314055  | Rv2054-Rv2055c  | 10,64  | 9,41  | 5,31   | 0,90                                                    |
| 2338490-2338600c | Rv2081c-Rv2082  | 12,12  | 15,88 | 6,60   | 1,12 miotto:candidate_300A* (8)                         |
| 2358222-2358319  | Rv2097c-Rv2100  | 0,00   | 10,42 | 0,00   | 0,00                                                    |
| 2360191-2360280  | Rv2100-Rv2101   | 35,34  | 12,37 | 10,46  | 4,16                                                    |
| 2366958-2367082  | Rv2106-Rv2107   | 18,59  | 20,79 | 19,24  | 3,00                                                    |
| 2367140-2367234  | Rv2106-Rv2107   | 6,44   | 7,81  | 2,20   | 0,00                                                    |
| 2368491-2368581  | Rv2108-Rv2109c  | 18,82  | 13,26 | 4,60   | 2,74 arnvig:MTS1635 (7);<br>miotto:candidate_305A (8)   |
| 2368517-2368617c | Rv2108-Rv2109c  | 0,00   | 17,46 | 0,00   | 0,00 arnvig:MTS1635* (7);<br>miotto:candidate_305A* (8) |
| 2368627-2368743c | Rv2108-Rv2109c  | 2,09   | 30,93 | 2,68   | 4,27 arnvig:MTS1635* (7)                                |
| 2368934-2369023c | Rv2108-Rv2109c  | 13,59  | 6,19  | 16,27  | 1,39                                                    |
| 2370714-2371047c | Rv2111c-Rv2112c | 117,57 | 33,06 | 54,17  | 17,19                                                   |
| 2376432-2376533  | Rv2115c-Rv2116  | 22,79  | 22,74 | 8,20   | 1,22                                                    |
| 2388514-2388625  | Rv2126c-Rv2127  | 129,98 | 8,28  | 27,08  | 5,57                                                    |
| 2393706-2393913c | Rv2132-Rv2133c  | 8,23   | 21,41 | 4,02   | 4,80                                                    |
| 2401777-2401856c | Rv2141c-Rv2142c | 3,06   | 19,72 | 0,00   | 0,00                                                    |
| 2404030-2404089c | Rv2143-Rv2144c  | 2,04   | 17,01 | 8,72   | 0,00                                                    |
| 2409607-2409694  | Rv2150c-Rv2151c | 23,63  | 63,27 | 0,00   | 0,00                                                    |
| 2420531-2420726c | Rv2158c-Rv2159c | 149,17 | 46,40 | 133,40 | 52,22                                                   |
| 2424720-2425007c | Rv2162c-Rv2163c | 232,35 | 69,92 | 41,76  | 8,67                                                    |
| 2429986-2430086c | Rv2166c-Rv2167c | 1,21   | 17,46 | 0,00   | 2,47                                                    |
| 2431511-2431599c | Rv2168c-Rv2169c | 1,37   | 13,55 | 5,88   | 16,83                                                   |
| 2431872-2432077c | Rv2169c-Rv2170  | 44,54  | 53,60 | 12,19  | 15,75 miotto:candidate_316A* (8)                        |
| 2434813-2434877  | Rv2172c-Rv2173  | 0,00   | 17,13 | 1,61   | 0,00                                                    |
| 2440006-2440146c | Rv2177c-Rv2178c | 11,28  | 21,06 | 3,71   | 4,43                                                    |
| 2445258-2445492c | Rv2182c-Rv2183c | 57,26  | 27,25 | 8,90   | 9,56 miotto:candidate_318A* (8)                         |
| 2446896-2447174c | Rv2184c-Rv2185c | 171,01 | 50,89 | 45,73  | 17,00                                                   |

|                               |                 |         |        |         |          |                            |
|-------------------------------|-----------------|---------|--------|---------|----------|----------------------------|
| 2447450-2447572c              | Rv2185c-Rv2186c | 92,50   | 18,11  | 17,86   | 13,19    | miotto:candidate_319A* (8) |
| 2451970-2452091c              | Rv2189c-Rv2190c | 38,10   | 2,28   | 19,72   | 3,07     |                            |
| 2453190-2453444c              | Rv2190c-Rv2191  | 20,15   | 6,55   | 5,33    | 0,98     |                            |
| 2462945-2463296c              | Rv2198c-Rv2199c | 109,82  | 77,24  | 22,28   | 7,45     |                            |
| 2467890-2468325c              | Rv2202c-Rv2203  | 30,58   | 47,67  | 8,88    | 6,01     | miotto:candidate_322A* (8) |
| 2468886-2468966               | Rv2203-Rv2204c  | 15,10   | 8,02   | 5,16    | 3,08     |                            |
| 2473230-2473351c              | Rv2208-Rv2209   | 5,01    | 31,18  | 3,43    | 5,12     | miotto:candidate_324A* (8) |
| 2478158-2478511c              | Rv2212-Rv2213   | 6,22    | 57,67  | 2,66    | 12,69    |                            |
| 2487511-2487580               | Rv2219A-Rv2220  | 1,75    | 13,26  | 2,99    | 0,00     |                            |
| 2489113-2489246               | Rv2220-Rv2221c  | 64,82   | 6,23   | 44,49   | 3,73     |                            |
| 2489257-2489333               | Rv2220-Rv2221c  | 3,18    | 7,23   | 14,94   | 1,62     |                            |
| 2497370-2497441c              | Rv2224c-Rv2225  | 3,40    | 11,60  | 1,45    | 3,47     |                            |
| MTB000026,rnpB,misc_RNA:Rvns0 |                 |         |        |         |          |                            |
| 2500379-2500822c              | Rv-2226-Rv2227  | 3229,20 | 958,84 | 1292,29 | 11090,00 | 1                          |
| 2509339-2509531c              | Rv2236c-Rv2237  | 1,90    | 19,23  | 0,54    | 0,65     |                            |
| 2510295-2510405c              | Rv2237-Rv2237A  | 430,93  | 93,63  | 129,09  | 25,86    |                            |
| 2522304-2522401               | Rv2247-Rv2248   | 16,23   | 19,88  | 1,07    | 0,00     |                            |
| 2529169-2529316c              | Rv2255c-Rv2256c | 84,31   | 84,64  | 12,72   | 23,61    |                            |
| 2535536-2535634c              | Rv2262c-Rv2263  | 1,24    | 12,18  | 0,00    | 0,00     |                            |
| 2538251-2538564c              | Rv2264c-Rv2265  | 7,01    | 20,98  | 1,00    | 0,40     |                            |
| 2562458-2562515               | Rv2289-Rv2290   | 8,44    | 1,60   | 16,23   | 0,00     |                            |
| 2563006-2563249               | Rv2290-Rv2291   | 29,08   | 18,25  | 24,86   | 19,44    |                            |
| 2567239-2567675               | Rv2295-Rv2296   | 6,44    | 28,67  | 4,31    | 1,71     |                            |
| 2567462-2567540c              | Rv2295-Rv2296   | 6,19    | 15,27  | 1,32    | 1,58     |                            |
| 2573712-2573889               | Rv2301-Rv2302   | 68,73   | 29,71  | 13,51   | 11,22    |                            |
| 2578677-2578941c              | Rv2307c-Rv2307A | 8,77    | 42,37  | 4,34    | 2,35     |                            |
| 2579065-2579244c              | Rv2307c-Rv2307A | 37,38   | 47,94  | 18,01   | 7,63     |                            |
| 2579338-2579539c              | Rv2307A-Rv2307B | 3,63    | 22,97  | 0,52    | 1,24     |                            |
| 2580184-2580284               | Rv2307D-Rv2308  | 4,84    | 11,94  | 1,04    | 0,00     | miotto:candidate_333A (8)  |
| 2580189-2580265c              | Rv2307D-Rv2308  | 19,07   | 44,59  | 4,07    | 0,00     |                            |
| 2581666-2581764c              | Rv2308-Rv2309c  | 3,71    | 15,93  | 1,06    | 1,26     |                            |
| 2582895-2583037c              | Rv2309c-Rv2309A | 8,55    | 27,90  | 2,93    | 0,87     |                            |
| 2584826-2585003c              | Rv2312-Rv2313c  | 37,11   | 14,08  | 18,80   | 4,21     |                            |
| 2585820-2586010c              | Rv2313c-Rv2314c | 57,64   | 10,20  | 15,33   | 5,23     |                            |

|                  |                 |        |       |       |       |                            |
|------------------|-----------------|--------|-------|-------|-------|----------------------------|
| 2596283-2596379  | Rv2323c-Rv2324  | 13,87  | 13,39 | 1,08  | 3,86  |                            |
| 2600478-2600657c | Rv2327-Rv2328   | 0,68   | 21,65 | 1,16  | 2,77  |                            |
| 2600542-2600593  | Rv2327-Rv2328   | 4,71   | 10,71 | 2,01  | 2,40  |                            |
| 2608536-2608637  | Rv2333c-Rv2334  | 28,78  | 0,91  | 4,10  | 0,00  |                            |
| 2612947-2613058c | Rv2337c-Rv2338c | 3,28   | 16,57 | 0,93  | 0,00  |                            |
| 2614512-2614579  | Rv2338c-Rv2339  | 52,17  | 5,46  | 7,69  | 5,51  |                            |
| 2617549-2617676c | Rv2339-Rv2340c  | 1,91   | 19,57 | 8,17  | 0,00  |                            |
| 2619262-2619359c | Rv2340c-Rv2341  | 2,50   | 15,15 | 0,00  | 1,27  |                            |
| 2620133-2620233  | Rv2341-Rv2342   | 0,00   | 16,54 | 1,04  | 2,47  |                            |
| 2628647-2628754c | Rv2349c-Rv2350c | 47,57  | 6,01  | 8,72  | 2,31  |                            |
| 2632686-2632753  | Rv2351c-Rv2352c | 1,80   | 15,01 | 3,08  | 3,67  |                            |
| 2634011-2634257c | Rv2352c-Rv2353c | 8,92   | 26,67 | 5,08  | 1,01  |                            |
| 2634440-2634546c | Rv2352c-Rv2353c | 1,14   | 26,88 | 0,00  | 0,00  |                            |
| 2637015-2637104c | Rv2355-Rv2356c  | 10,87  | 76,30 | 3,49  | 20,80 | arnvig:MTS1827 (7)         |
| 2637199-2637320c | Rv2355-Rv2356c  | 27,07  | 57,80 | 18,00 | 20,46 | arnvig:MTS1827 (7)         |
| 2637531-2637612  | Rv2355-Rv2356c  | 14,92  | 13,58 | 3,83  | 6,09  |                            |
| 2637541-2637603c | Rv2355-Rv2356c  | 25,24  | 2,95  | 4,98  | 0,00  |                            |
| 2646641-2646736c | Rv2364c-Rv2365c | 21,66  | 10,63 | 5,45  | 0,00  |                            |
| 2655014-2655263c | Rv2374c-Rv2375  | 83,68  | 33,78 | 33,89 | 3,00  | miotto:candidate_349A* (8) |
| 2680190-2680768c | Rv2386c-Rv2387  | 1,69   | 46,64 | 0,36  | 1,08  |                            |
| 2683184-2683237  | Rv2388c-Rv2389c | 0,00   | 17,18 | 0,00  | 0,00  |                            |
| 2684471-2684545  | Rv2390c-Rv2391  | 13,05  | 3,71  | 22,31 | 0,00  |                            |
| 2709939-2710040c | Rv2411c-Rv2412  | 0,00   | 17,28 | 2,05  | 0,00  |                            |
| 2726775-2726826c | Rv2428-Rv2429   | 0,00   | 17,84 | 0,00  | 9,60  |                            |
| 2728196-2728358c | Rv2431c-Rv2432c | 28,52  | 27,89 | 0,64  | 47,47 |                            |
| 2728388-2728474c | Rv2431c-Rv2432c | 4,22   | 11,73 | 3,61  | 27,26 | miotto:candidate_358A* (8) |
| 2739586-2739863c | Rv2440c-Rv2441c | 162,38 | 59,41 | 96,31 | 30,98 |                            |
| 2744800-2745272c | Rv2444c-Rv2445c | 33,62  | 96,91 | 15,26 | 13,46 |                            |
| 2752650-2752768c | Rv2451-Rv2452c  | 53,46  | 44,45 | 5,27  | 2,10  |                            |
| 2760787-2760888  | Rv2458-Rv2459   | 13,19  | 13,65 | 13,33 | 1,22  | miotto:candidate_367A (8)  |
| 2782259-2782339c | Rv2476c-Rv2477c | 13,59  | 11,46 | 12,91 | 3,08  |                            |
| 2786328-2786479  | Rv2480c-Rv2481c | 22,54  | 5,49  | 0,69  | 1,64  |                            |
| 2786518-2786618  | Rv2480c-Rv2481c | 0,00   | 12,86 | 1,04  | 1,24  |                            |
| 2792464-2792580c | Rv2484c-Rv2485c | 20,91  | 18,24 | 11,62 | 8,53  |                            |

|                  |                 |        |        |       |       |                                 |
|------------------|-----------------|--------|--------|-------|-------|---------------------------------|
| 2794251-2794352  | Rv2485c-Rv2486  | 10,79  | 16,37  | 1,03  | 2,45  |                                 |
| 2811996-2812378c | Rv2497c-Rv2498c | 46,63  | 135,67 | 18,57 | 41,06 |                                 |
| 2821552-2821655  | Rv2505c-Rv2506  | 0,00   | 19,63  | 0,00  | 0,00  |                                 |
| 2822356-2822457  | Rv2506-Rv2507   | 1,20   | 10,92  | 0,00  | 0,00  |                                 |
| 2828016-2828125  | Rv2511-Rv2512c  | 1,11   | 9,28   | 1,90  | 0,00  |                                 |
| 2828245-2828366  | Rv2511-Rv2512c  | 34,09  | 12,17  | 7,72  | 3,07  |                                 |
|                  |                 |        |        |       |       | mobile_element:mobile_element28 |
| 2828388-2828618  | Rv2511-Rv2512c  | 225,08 | 19,68  | 45,28 | 3,78  | *                               |
|                  |                 |        |        |       |       | mobile_element:mobile_element28 |
| 2829809-2829955  | Rv2512c-Rv2513  | 7,49   | 20,20  | 4,98  | 12,74 | *                               |
| 2830085-2830179c | Rv2512c-Rv2513  | 0,00   | 11,72  | 0,00  | 0,00  |                                 |
| 2830510-2830846  | Rv2513-Rv2514c  | 15,97  | 44,88  | 4,34  | 10,74 |                                 |
| 2830610-2830922c | Rv2513-Rv2514c  | 0,78   | 38,84  | 0,33  | 0,80  |                                 |
| 2835420-2835476  | Rv2518c-Rv2519  | 19,32  | 73,26  | 3,67  | 15,33 |                                 |
| 2835568-2835819  | Rv2518c-Rv2519  | 88,84  | 500,04 | 32,37 | 39,62 |                                 |
| 2837592-2837648  | Rv2520c-Rv2521  | 2,15   | 16,28  | 0,00  | 0,00  | miotto:candidate_382A (8)       |
| 2849288-2849452c | Rv2524c-Rv2525c | 43,00  | 25,87  | 8,87  | 3,03  |                                 |
| 2849603-2849704c | Rv2524c-Rv2525c | 6,00   | 12,74  | 0,00  | 0,00  |                                 |
| 2866032-2866764c | Rv2542-Rv2543   | 16,36  | 42,15  | 26,68 | 8,68  |                                 |
| 2870560-2870661c | Rv2550c-Rv2551c | 2,40   | 12,74  | 1,03  | 0,00  |                                 |
| 2870685-2870741c | Rv2550c-Rv2551c | 6,44   | 24,42  | 9,17  | 0,00  |                                 |
| 2876354-2876709c | Rv2555c-Rv2556c | 131,27 | 64,38  | 22,62 | 11,92 | miotto:candidate_385A* (8)      |
| 2881679-2881777  | Rv2561-Rv2562   | 0,00   | 12,18  | 0,00  | 0,00  |                                 |
| 2900123-2900321c | Rv2575-Rv2576c  | 46,11  | 17,25  | 8,41  | 2,51  |                                 |
| 2910765-2911166c | Rv2584c-Rv2585c | 87,95  | 31,16  | 71,81 | 28,25 |                                 |
| 2916161-2916259c | Rv2588c-Rv2589  | 24,71  | 10,31  | 39,09 | 5,04  |                                 |
| 2917781-2917882c | Rv2589-Rv2590   | 0,00   | 10,01  | 0,00  | 0,00  |                                 |
| 2921286-2921620  | Rv2590-Rv2591   | 48,20  | 36,84  | 43,40 | 7,08  |                                 |
| 2926094-2926187  | Rv2596-Rv2597   | 16,92  | 2,96   | 20,03 | 1,33  |                                 |
| 2927827-2928016  | Rv2599-Rv2600   | 45,07  | 2,93   | 17,06 | 1,31  |                                 |
| 2929994-2930047c | Rv2601-Rv2601A  | 0,00   | 24,06  | 1,94  | 0,00  |                                 |
| 2934945-2935042  | Rv2607-Rv2608   | 9,99   | 11,36  | 4,27  | 2,55  |                                 |
| 2943227-2943360c | Rv2614c-Rv2614A | 11,87  | 15,23  | 2,34  | 0,00  |                                 |
| 2945034-2945412c | Rv2615c-Rv2616  | 0,97   | 44,80  | 0,28  | 0,33  |                                 |

|                  |                 |       |        |       |       |                            |
|------------------|-----------------|-------|--------|-------|-------|----------------------------|
| 2945061-2945160  | Rv2615c-Rv2616  | 0,00  | 10,21  | 0,00  | 1,25  |                            |
| 2951210-2951430c | Rv2624c-Rv2625c | 39,86 | 17,21  | 0,47  | 15,25 |                            |
| 2955371-2955880  | Rv2628-Rv2629   | 33,34 | 22,38  | 17,43 | 32,30 | miotto:candidate_402A (8)  |
| 2957368-2957591  | Rv2630-Rv2631   | 19,66 | 34,38  | 3,74  | 13,37 |                            |
| 2959221-2959291c | Rv2632c-Rv2633c | 53,41 | 60,12  | 19,15 | 14,06 |                            |
| 2964215-2964311c | Rv2637-Rv2638   | 1,26  | 12,44  | 0,00  | 2,57  |                            |
| 2965282-2965516c | Rv2639c-Rv2640c | 42,69 | 76,21  | 28,93 | 4,78  |                            |
| 2965380-2965440  | Rv2639c-Rv2640c | 0,00  | 16,73  | 0,00  | 0,00  |                            |
| 2969170-2969351  | Rv2644c-Rv2645  | 1,34  | 12,75  | 0,00  | 0,00  |                            |
| 2969193-2969323c | Rv2644c-Rv2645  | 0,93  | 14,17  | 0,80  | 2,86  |                            |
| 2973570-2973660c | Rv2649-Rv2650c  | 20,17 | 43,85  | 3,45  | 2,74  |                            |
| 2973675-2973792c | Rv2649-Rv2650c  | 42,51 | 22,80  | 11,52 | 42,31 |                            |
| 2975702-2975895c | Rv2651c-Rv2652c | 2,52  | 11,96  | 2,70  | 21,23 |                            |
| 2980879-2980963c | Rv2659c-Rv2660c | 0,00  | 12,01  | 0,00  | 1,47  | miotto:candidate_407A* (8) |
| 2982439-2982551  | Rv2664-Rv2665   | 3,25  | 24,63  | 0,93  | 4,42  |                            |
| 2982486-2982587c | Rv2664-Rv2665   | 0,00  | 20,01  | 0,00  | 2,45  |                            |
| 2982575-2982746  | Rv2664-Rv2665   | 9,96  | 37,22  | 6,08  | 7,26  | miotto:candidate_408A (8)  |
| 3005561-3005762c | Rv2688c-Rv2689c | 93,27 | 82,69  | 16,05 | 19,15 |                            |
| 3009195-3009298  | Rv2690c-Rv2691  | 2,35  | 25,87  | 3,02  | 0,00  |                            |
| 3011324-3011434c | Rv2693c-Rv2694c | 26,45 | 201,47 | 3,77  | 6,75  |                            |
| 3012688-3012747c | Rv2695-Rv2696c  | 24,47 | 7,73   | 0,00  | 20,80 |                            |
| 3028008-3028186  | Rv2714-Rv2715   | 10,25 | 22,29  | 11,69 | 2,79  |                            |
| 3029111-3029212c | Rv2715-Rv2716   | 3,60  | 10,92  | 0,00  | 1,22  |                            |
| 3036036-3036197c | Rv2723-Rv2724c  | 10,57 | 27,49  | 3,23  | 10,02 |                            |
| 3042973-3043073  | Rv2730-Rv2731   | 20,59 | 40,42  | 4,14  | 2,47  |                            |
| 3053719-3053790  | Rv2740-Rv2741   | 3,40  | 16,75  | 5,81  | 1,73  |                            |
| 3073536-3073715c | Rv2763c-Rv2764c | 21,07 | 11,34  | 12,78 | 6,24  |                            |
| 3080409-3080509c | Rv2770c-Rv2771c | 21,80 | 22,05  | 10,36 | 2,47  |                            |
| 3081016-3081117c | Rv2771c-Rv2772c | 10,79 | 11,83  | 6,15  | 1,22  |                            |
| 3082720-3082805c | Rv2774c-Rv2775  | 4,27  | 10,79  | 0,00  | 1,45  |                            |
| 3084286-3084356c | Rv2776c-Rv2777c | 3,45  | 32,67  | 17,68 | 12,31 |                            |
| 3085636-3085693c | Rv2777c-Rv2778c | 6,33  | 20,80  | 1,80  | 0,00  |                            |
| 3087846-3088052  | Rv2780-Rv2781c  | 37,82 | 320,51 | 22,74 | 26,53 |                            |
| 3088972-3089040c | Rv2781c-Rv2782c | 1,77  | 0,00   | 16,67 | 0,00  |                            |

|                  |                 |        |        |        |                                                                     |
|------------------|-----------------|--------|--------|--------|---------------------------------------------------------------------|
| 3092604-3092720c | Rv2783c-Rv2784c | 10,46  | 16,65  | 3,58   | 1,07                                                                |
| 3094991-3095087c | Rv2786c-Rv2787  | 6,31   | 13,39  | 3,23   | 5,15                                                                |
| 3102010-3102416c | Rv2792c-Rv2793c | 50,80  | 20,06  | 44,97  | 25,76 miotto:candidate_419A* (8)<br>mobile_element:mobile_element31 |
| 3102092-3102272c | Rv2792c-Rv2793c | 83,81  | 41,01  | 74,54  | 44,13 *; miotto:candidate_419A* (8)                                 |
| 3115247-3115417  | Rv2808-Rv2809   | 5,01   | 21,16  | 4,28   | 1,46                                                                |
| 3126202-3126268c | Rv2818c-Rv2819c | 10,96  | 13,85  | 10,93  | 1,86                                                                |
| 3132831-3132925  | Rv2824c-Rv2825c | 3,86   | 20,51  | 0,00   | 2,63                                                                |
| 3162121-3162302c | Rv2852c-Rv2853  | 0,00   | 19,88  | 0,57   | 0,69                                                                |
| 3168247-3168298c | Rv2856-Rv2857c  | 0,00   | 0,00   | 22,12  | 2,40                                                                |
| 3168507-3168608c | Rv2856-Rv2857c  | 25,19  | 23,65  | 12,30  | 7,34                                                                |
| 3178098-3178207c | Rv2866-Rv2867c  | 2,22   | 38,80  | 0,95   | 3,40                                                                |
| 3178126-3178307  | Rv2866-Rv2867c  | 2,02   | 22,43  | 0,00   | 0,69                                                                |
| 3178250-3178333c | Rv2866-Rv2867c  | 1,46   | 11,05  | 6,23   | 1,49                                                                |
| 3179286-3179352c | Rv2867c-Rv2868c | 40,17  | 99,72  | 26,54  | 11,18                                                               |
| 3200047-3200127c | Rv2890c-Rv2891  | 4,53   | 4,58   | 0,00   | 21,57                                                               |
| 3201984-3202081c | Rv2892c-Rv2893  | 2,50   | 16,10  | 0,00   | 0,00                                                                |
| 3202108-3202198c | Rv2892c-Rv2893  | 0,00   | 11,22  | 1,15   | 0,00                                                                |
| 3202236-3202314c | Rv2892c-Rv2893  | 1,55   | 12,92  | 0,00   | 3,16                                                                |
| 3208349-3208500c | Rv2898c-Rv2899c | 283,30 | 39,07  | 31,65  | 11,50                                                               |
| 3211703-3211881c | Rv2900c-Rv2901c | 114,82 | 21,25  | 64,86  | 20,22                                                               |
| 3212057-3212231c | Rv2901c-Rv2902c | 110,45 | 22,80  | 54,39  | 6,42                                                                |
| 3217732-3217846c | Rv2909c-Rv2910c | 0,00   | 24,21  | 0,00   | 0,00                                                                |
| 3232470-3232579c | Rv2920c-Rv2921c | 1,11   | 21,93  | 0,95   | 2,27                                                                |
| 3234047-3234308c | Rv2921c-Rv2922c | 61,63  | 11,33  | 11,58  | 3,81                                                                |
| 3239777-3239876c | Rv2924c-Rv2925c | 53,83  | 115,06 | 14,64  | 14,98<br>arnvig:MTS2255 (7);                                        |
| 3243368-3243838  | Rv2929-Rv2930   | 38,44  | 103,63 | 22,87  | 21,73 miotto:candidate_432A (8)                                     |
| 3274839-3274973c | Rv2938-Rv2939   | 0,00   | 16,50  | 0,00   | 0,00                                                                |
| 3274869-3274970  | Rv2938-Rv2939   | 9,59   | 15,47  | 5,13   | 3,67                                                                |
| 3276232-3276458c | Rv2939-Rv2940c  | 47,43  | 132,44 | 24,88  | 24,74                                                               |
| 3282604-3282837c | Rv2940c-Rv2941  | 232,12 | 252,20 | 106,82 | 70,94 miotto:candidate_435A* (8)                                    |
| 3287900-3288017  | Rv2942-Rv2943   | 27,99  | 16,51  | 7,09   | 1,06                                                                |
| 3287979-3288079c | Rv2942-Rv2943   | 1,21   | 11,02  | 0,00   | 1,24                                                                |

|                  |                   |        |        |        |                                  |
|------------------|-------------------|--------|--------|--------|----------------------------------|
| 3291190-3291473c | Rv2945c-Rv2946c   | 72,80  | 3,59   | 13,99  | 2,64                             |
| 3302457-3302538c | Rv2950c-Rv2951c   | 10,44  | 12,45  | 14,03  | 12,18                            |
| 3303060-3303115c | Rv2950c-Rv2951c   | 21,85  | 6,63   | 24,28  | 4,46                             |
| 3304399-3304463c | Rv2951c-Rv2952    | 1,88   | 14,28  | 1,61   | 1,92                             |
| 3306528-3306749c | Rv2953-Rv2954c    | 45,19  | 5,43   | 31,09  | 3,94                             |
| 3307505-3307605c | Rv2954c-Rv2955c   | 13,32  | 11,94  | 32,10  | 0,00                             |
| 3310323-3310418c | Rv2957-Rv2958c    | 1,27   | 15,47  | 3,27   | 1,30                             |
| 3311948-3312126c | Rv2958c-Rv2959c   | 34,17  | 23,33  | 12,27  | 2,09                             |
| 3312762-3312925c | Rv2959c-Rv2960c   | 142,48 | 38,47  | 10,84  | 9,13 miotto:candidate_444A* (8)  |
| 3313556-3313834c | Rv2961-Rv2962c    | 2,19   | 12,97  | 5,25   | 2,24                             |
| 3325628-3325804c | Rv2970c-Rv2970A   | 51,84  | 19,92  | 14,18  | 8,46 miotto:candidate_445A* (8)  |
| 3325775-3325870  | Rv2970c-Rv2970A   | 5,10   | 9,67   | 1,09   | 1,30                             |
| 3331795-3331935  | Rv2975c-Rv2976c   | 84,16  | 48,04  | 39,31  | 29,21 arnvig:MTS2292 (7)         |
| 3331988-3332095  | Rv2975c-Rv2976c   | 0,00   | 13,75  | 6,78   | 1,16                             |
| 3332717-3332825c | Rv2976c-Rv2977c   | 17,96  | 1,70   | 6,72   | 0,00                             |
| 3335810-3335892c | Rv2979c-Rv2980    | 20,63  | 6,71   | 5,04   | 1,50                             |
| 3339788-3339844  | Rv2983-Rv2984     | 6,44   | 14,65  | 3,67   | 6,57                             |
| 3343683-3344263c | Rv2986c-Rv2987c   | 72,43  | 43,76  | 5,94   | 3,01                             |
| 3347701-3347849c | Rv2990c-Rv2991    | 64,86  | 120,19 | 36,50  | 64,50                            |
| 3356690-3356795c | Rv2997-Rv2998     | 58,86  | 8,75   | 11,84  | 2,35 miotto:candidate_449A* (8)  |
| 3359288-3359438c | Rv3000-Rv3001c    | 12,96  | 7,37   | 6,23   | 18,18                            |
| 3359484-3359537  | Rv3000-Rv3001c    | 6,80   | 18,90  | 5,81   | 6,93                             |
| 3363028-3363154c | Rv3003c-Rv3004    | 852,49 | 299,56 | 190,24 | 92,38 miotto:candidate_451A* (8) |
| 3375621-3375712c | Rv3015c-Rv3016    | 10,64  | 8,07   | 4,55   | 35,27                            |
| 3376363-3376430  | Rv3016-Rv3017c    | 1,80   | 16,37  | 6,15   | 3,67                             |
| 3376775-3377021c | Rv3017c-Rv3018c   | 14,86  | 19,91  | 1,69   | 19,20                            |
| 3378382-3378467c | Rv3018A-Rv3019c   | 22,76  | 70,13  | 7,30   | 5,81                             |
| 3378505-3378713c | Rv3018A-Rv3019c   | 42,14  | 76,81  | 6,51   | 4,18                             |
| 3380298-3380351  | Rv3020c-Rv3022A,n | 0,00   | 17,18  | 0,00   | 0,00 misc_feature:Rv3021c* (8)   |
| 3380973-3381153c | Rv3022A-Rv3023c   | 0,00   | 22,56  | 0,58   | 0,69                             |
| 3388864-3388956c | Rv3029c-Rv3030    | 36,83  | 11,97  | 3,37   | 2,68 miotto:candidate_455A* (8)  |
| 3394980-3395078c | Rv3034c-Rv3035    | 12,36  | 12,18  | 1,06   | 1,26                             |
| 3403115-3403277c | Rv3042c-Rv3043c   | 30,02  | 2,85   | 16,68  | 1,53                             |
| 3410863-3411327c | Rv3049c-Rv3050c   | 10,26  | 37,72  | 2,25   | 8,86                             |



|                  |                 |         |         |         |          |                                              |
|------------------|-----------------|---------|---------|---------|----------|----------------------------------------------|
| 3414927-3415191c | Rv3053c-Rv3054c | 137,11  | 268,92  | 106,17  | 45,21    | miotto:candidate_463A* (8)                   |
| 3415323-3415374c | Rv3053c-Rv3054c | 30,58   | 296,22  | 0,00    | 0,00     |                                              |
| 3418576-3418777c | Rv3057c-Rv3058c | 35,73   | 25,26   | 17,09   | 4,33     |                                              |
| 3421224-3421387  | Rv3059-Rv3060c  | 13,43   | 11,32   | 7,65    | 0,00     | arnvig:MTS2362 (7)                           |
| 3421406-3421584  | Rv3059-Rv3060c  | 19,14   | 26,44   | 8,18    | 2,09     | arnvig:MTS2362 (7)                           |
| 3421637-3421828c | Rv3059-Rv3060c  | 3,19    | 16,43   | 1,09    | 0,65     |                                              |
| 3429748-3429849  | Rv3063-Rv3064c  | 0,00    | 11,83   | 0,00    | 0,00     |                                              |
| 3431231-3431431c | Rv3066-Rv3067   | 6,09    | 36,93   | 1,56    | 3,73     |                                              |
| 3431328-3431399  | Rv3066-Rv3067   | 23,79   | 9,02    | 2,91    | 1,73     |                                              |
| 3435548-3435646c | Rv3071-Rv3072c  | 2,47    | 14,06   | 2,11    | 10,09    |                                              |
| 3445944-3446042c | Rv3080c-Rv3081  | 39,54   | 21,56   | 30,64   | 1,26     |                                              |
| 3447219-3447381c | Rv3081-Rv3082c  | 3,75    | 107,59  | 2,57    | 50,54    |                                              |
| 3452836-3452963  | Rv3086-Rv3087   | 14,34   | 20,30   | 6,54    | 1,95     |                                              |
| 3458035-3458127c | Rv3089-Rv3090   | 5,26    | 11,97   | 1,12    | 1,34     |                                              |
| 3466924-3467323c | Rv3097c-Rv3098c | 10,70   | 31,09   | 1,05    | 7,49     |                                              |
|                  |                 |         |         |         |          | MTB000042,ssr,10SaRNA,misc_RNA<br>:RVnc0046; |
| 3467872-3468503c | Rv3098A-Rv3099c | 9332,88 | 4244,31 | 2899,20 | 17806,90 | miotto:candidate_466A* (8)                   |
| 3476990-3477071c | Rv3107c-Rv3108  | 19,39   | 3,39    | 5,10    | 3,04     |                                              |
| 3486207-3486450  | Rv3120-Rv3121   | 30,58   | 23,20   | 9,43    | 1,02     |                                              |
| 3487692-3487792  | Rv3121-Rv3122   | 1,21    | 10,11   | 2,07    | 0,00     |                                              |
| 3487908-3488010  | Rv3121-Rv3122   | 13,06   | 23,42   | 8,12    | 1,21     |                                              |
| 3489140-3489288  | Rv3123-Rv3124   | 0,82    | 23,04   | 0,00    | 0,00     |                                              |
| 3490404-3490490  | Rv3124-Rv3125c  | 1,41    | 13,87   | 1,20    | 2,87     |                                              |
|                  |                 |         |         |         |          | misc_feature:Rv3128c*;                       |
| 3493057-3493370  | Rv3127-Rv3129   | 337,01  | 46,10   | 124,57  | 58,43    | miotto:candidate_469A (8)                    |
| 3493454-3493557  | Rv3127-Rv3129   | 36,47   | 2,68    | 8,05    | 9,60     | misc_feature:Rv3128c* (8)                    |
| 3494546-3494704c | Rv3127-Rv3129   | 2,31    | 0,58    | 0,66    | 19,62    |                                              |
| 3499846-3500008c | Rv3133c-Rv3134c | 103,57  | 9,68    | 80,21   | 39,82    | miotto:candidate_478A* (8)                   |
| 3501217-3501278  | Rv3134c-Rv3135  | 17,76   | 5,99    | 1,69    | 6,04     | miotto:candidate_481A (8)                    |
| 3503208-3503384  | Rv3136A-Rv3137  | 39,40   | 1,57    | 1,77    | 1,41     | miotto:candidate_484A (8)                    |
| 3509609-3509675c | Rv3142c-Rv3143  | 3,65    | 15,23   | 0,00    | 0,00     |                                              |
| 3511287-3511385c | Rv3144c-Rv3145  | 22,24   | 11,25   | 17,96   | 0,00     |                                              |
| 3511618-3511737  | Rv3144c-Rv3145  | 33,64   | 27,06   | 31,38   | 2,08     |                                              |

|                  |                 |        |        |       |                                                        |
|------------------|-----------------|--------|--------|-------|--------------------------------------------------------|
| 3519101-3519280  | Rv3151-Rv3152   | 10,87  | 2,06   | 26,73 | 0,69                                                   |
| 3529192-3529243c | Rv3159c-Rv3160c | 14,12  | 19,63  | 10,06 | 2,40                                                   |
| 3538370-3538470  | Rv3169-Rv3170   | 3,63   | 11,02  | 9,32  | 4,94                                                   |
| 3540678-3540928c | Rv3171c-Rv3172c | 84,81  | 32,90  | 53,75 | 8,95                                                   |
| 3541243-3541562c | Rv3172c-Rv3173c | 13,00  | 22,62  | 6,54  | 4,29                                                   |
| 3547192-3547268c | Rv3178-Rv3179   | 1,59   | 13,26  | 0,00  | 1,62                                                   |
| 3549022-3549133c | Rv3179-Rv3180c  | 7,65   | 21,54  | 1,87  | 2,23                                                   |
| 3555294-3555408  | Rv3189-Rv3190c  | 0,00   | 11,30  | 1,82  | 2,17                                                   |
| 3556982-3557160  | Rv3190A-Rv3191c | 86,80  | 4,67   | 19,87 | 1,39 arnvig:MTS2458* (7);<br>miotto:candidate_488A (8) |
| 3557066-3557289c | Rv3190A-Rv3191c | 55,71  | 0,41   | 9,81  | 1,67 arnvig:MTS2458 (7);<br>miotto:candidate_488A* (8) |
| 3558908-3558997c | Rv3191c-Rv3192  | 0,00   | 11,34  | 2,32  | 1,39                                                   |
| 3559054-3559155c | Rv3191c-Rv3192  | 3,60   | 10,92  | 2,05  | 3,67                                                   |
| 3559159-3559265c | Rv3191c-Rv3192  | 8,00   | 11,27  | 0,00  | 1,17                                                   |
| 3568804-3568906c | Rv3197A-Rv3198c | 23,75  | 4,50   | 0,00  | 0,00                                                   |
| 3568916-3569154c | Rv3197A-Rv3198c | 41,46  | 11,65  | 16,19 | 4,18                                                   |
| 3580265-3580422  | Rv3202c-Rv3203  | 24,78  | 19,38  | 2,65  | 1,58                                                   |
| 3580482-3580640c | Rv3202c-Rv3203  | 5,39   | 15,17  | 0,00  | 2,35                                                   |
| 3581563-3581685  | Rv3204-Rv3205c  | 20,89  | 37,72  | 9,35  | 8,12                                                   |
| 3584719-3584838c | Rv3207c-Rv3208  | 28,54  | 9,28   | 13,07 | 17,68                                                  |
| 3586097-3586286  | Rv3208A-Rv3209  | 159,04 | 2,93   | 17,62 | 0,66                                                   |
| 3587657-3587711  | Rv3210c-Rv3211  | 17,79  | 64,11  | 17,11 | 4,54                                                   |
| 3593406-3593523c | Rv3215-Rv3217c  | 14,51  | 17,30  | 2,66  | 1,06 misc_feature:Rv3216* (8)                          |
| 3594324-3594444c | Rv3217c-Rv3218  | 14,15  | 5,37   | 1,73  | 31,98                                                  |
| 3597808-3598171  | Rv3221c-Rv3221A | 206,36 | 169,01 | 47,41 | 18,86 miotto:candidate_498A                            |
| 3597899-3597958c | Rv3221c-Rv3221A | 12,23  | 49,49  | 1,74  | 20,80 miotto:candidate_498A* (8)                       |
| 3599519-3599749c | Rv3223c-Rv3224  | 98,50  | 124,93 | 3,62  | 254,48                                                 |
| 3611164-3611252  | Rv3234c-Rv3235  | 4,12   | 14,60  | 2,35  | 1,40 miotto:candidate_500A (8)                         |
| 3611173-3611227c | Rv3234c-Rv3235  | 4,45   | 18,56  | 5,70  | 0,00 miotto:candidate_500A* (8)                        |
| 3617621-3617736c | Rv3239c-Rv3240c | 20,04  | 27,20  | 6,31  | 2,15                                                   |
| 3621106-3621553c | Rv3241c-Rv3242c | 22,39  | 48,26  | 39,45 | 4,74 miotto:candidate_502A* (8)                        |
| 3621292-3621463  | Rv3241c-Rv3242c | 4,98   | 17,80  | 1,22  | 5,08 miotto:candidate_503A (8)                         |
| 3629669-3629795c | Rv3248c-Rv3249c | 12,52  | 196,54 | 14,82 | 0,98                                                   |

|                  |                 |        |        |        |        |                                 |
|------------------|-----------------|--------|--------|--------|--------|---------------------------------|
| 3640177-3640370c | Rv3260c-Rv3261  | 39,73  | 136,32 | 18,87  | 116,45 | miotto:candidate_505A* (8)      |
| 3646834-3646938c | Rv3265c-Rv3266c | 32,62  | 24,74  | 12,95  | 2,38   |                                 |
| 3649320-3649457c | Rv3267-Rv3268   | 11,52  | 18,15  | 3,79   | 3,62   |                                 |
| 3666319-3666376  | Rv3284-Rv3285   | 67,50  | 35,20  | 3,61   | 12,91  |                                 |
| 3669962-3670063  | Rv3288c-Rv3289c | 23,99  | 37,30  | 1,03   | 3,67   |                                 |
| 3670371-3670483c | Rv3289c-Rv3290c | 41,14  | 246,35 | 325,80 | 33,14  |                                 |
| 3686823-3686988c | Rv3300c-Rv3301c | 47,17  | 10,62  | 24,57  | 1,50   |                                 |
| 3687456-3687757c | Rv3301c-Rv3302c | 36,46  | 9,83   | 25,97  | 3,72   |                                 |
| 3690961-3691049  | Rv3303c-Rv3304  | 30,24  | 0,00   | 1,18   | 4,21   |                                 |
| 3725970-3726100  | Rv3339c-Rv3340  | 39,22  | 43,21  | 15,17  | 9,53   |                                 |
| 3753419-3753647  | Rv3347c-Rv3348  | 8,55   | 18,23  | 8,68   | 4,36   |                                 |
| 3768158-3768215  | Rv3351c-Rv3352c | 2,11   | 16,00  | 0,00   | 0,00   |                                 |
| 3778521-3778613  | Rv3366-Rv3367   | 82,87  | 49,89  | 33,74  | 6,71   |                                 |
| 3786225-3786325c | Rv3371-Rv3372   | 19,38  | 2,76   | 7,25   | 11,12  |                                 |
| 3798324-3798782c | Rv3383c-Rv3384c | 25,32  | 44,07  | 17,32  | 3,26   |                                 |
| 3798637-3798738  | Rv3383c-Rv3384c | 7,20   | 13,65  | 0,00   | 3,67   |                                 |
| 3798909-3799058  | Rv3383c-Rv3384c | 1,63   | 14,23  | 0,70   | 2,50   |                                 |
| 3804803-3804908c | Rv3389c-Rv3390  | 27,70  | 17,51  | 7,89   | 1,18   |                                 |
| 3820373-3820514  | Rv3401-Rv3402c  | 37,05  | 1,96   | 7,37   | 1,76   |                                 |
| 3821878-3821973  | Rv3402c-Rv3403c | 0,00   | 10,63  | 0,00   | 3,90   |                                 |
| 3828628-3828833c | Rv3409c-Rv3410c | 62,36  | 16,22  | 45,69  | 3,03   |                                 |
| 3837322-3837523c | Rv3418c-Rv3419c | 21,80  | 70,28  | 17,09  | 38,93  |                                 |
|                  |                 |        |        |        |        | mobile_element:mobile_element_4 |
| 3844643-3844744  | Rv3427c-Rv3428c | 8,40   | 19,10  | 0,00   | 1,22   | 9*                              |
| 3845956-3846064c | Rv3428c-Rv3429  | 2,24   | 20,43  | 0,00   | 0,00   |                                 |
| 3846899-3846997c | Rv3428c-Rv3429  | 4,94   | 16,87  | 2,11   | 3,78   |                                 |
| 3849056-3849278c | Rv3430c-Rv3431c | 215,05 | 27,46  | 12,66  | 3,36   |                                 |
| 3850132-3850387c | Rv3431c-Rv3432c | 21,50  | 2,17   | 16,75  | 1,46   |                                 |
| 3854695-3854920c | Rv3435c-Rv3436c | 171,59 | 11,09  | 24,99  | 3,31   |                                 |
| 3861286-3861592c | Rv3441c-Rv3442c | 27,50  | 6,05   | 10,56  | 4,88   |                                 |
| 3877396-3877472c | Rv3456c-Rv3457c | 28,60  | 25,31  | 50,26  | 9,73   | miotto:candidate_520A* (8)      |
| 3879228-3879308c | Rv3458c-Rv3459c | 123,85 | 33,22  | 54,23  | 20,03  |                                 |
| 3883420-3883520  | Rv3465-Rv3466   | 12,11  | 11,94  | 8,28   | 6,18   |                                 |
| 3892252-3892356c | Rv3475-Rv3476c  | 19,81  | 0,88   | 18,93  | 3,57   |                                 |

|                  |                 |        |       |        |        |                            |
|------------------|-----------------|--------|-------|--------|--------|----------------------------|
| 3893958-3894144  | Rv3476c-Rv3477  | 826,91 | 72,45 | 422,27 | 182,21 | miotto:candidate_526A (8)  |
| 3895490-3895872  | Rv3478-Rv3479   | 63,24  | 18,41 | 77,83  | 6,52   |                            |
| 3902708-3902953c | Rv3483c-Rv3484  | 25,36  | 17,73 | 4,25   | 1,52   | miotto:candidate_528A* (8) |
| 3905707-3905803c | Rv3485c-Rv3486  | 11,35  | 2,87  | 25,88  | 1,29   | miotto:candidate_529A* (8) |
| 3906970-3907080c | Rv3487c-Rv3488  | 23,14  | 8,36  | 47,11  | 4,50   |                            |
| 3907093-3907222c | Rv3487c-Rv3488  | 34,82  | 24,27 | 47,47  | 10,56  |                            |
| 3907312-3907519c | Rv3487c-Rv3488  | 59,99  | 25,87 | 114,14 | 10,20  |                            |
| 3924801-3924899  | Rv3505-Rv3506   | 1,24   | 11,25 | 1,06   | 0,00   |                            |
| 3930847-3930952  | Rv3507-Rv3508   | 24,24  | 13,13 | 10,85  | 2,35   |                            |
| 3930955-3931049  | Rv3507-Rv3508   | 12,88  | 6,84  | 14,31  | 0,00   |                            |
| 3936840-3936911c | Rv3508-Rv3509c  | 20,39  | 11,60 | 8,72   | 1,73   |                            |
| 3950284-3950368c | Rv3514-Rv3515c  | 0,00   | 15,28 | 0,00   | 0,00   |                            |
| 3950443-3950571c | Rv3514-Rv3515c  | 2,85   | 23,74 | 0,81   | 1,94   |                            |
| 3950593-3950943c | Rv3514-Rv3515c  | 3,49   | 36,22 | 3,87   | 2,13   |                            |
| 3952502-3952583  | Rv3515c-Rv3516  | 10,44  | 18,11 | 1,28   | 0,00   |                            |
| 3955459-3955625c | Rv3518c-Rv3519  | 32,96  | 83,90 | 22,55  | 23,17  |                            |
| 3956181-3956362c | Rv3519-Rv3520c  | 7,39   | 12,24 | 6,32   | 4,11   |                            |
| 3956259-3956360  | Rv3519-Rv3520c  | 7,20   | 20,01 | 8,20   | 3,67   |                            |
| 3957394-3957517c | Rv3520c-Rv3521  | 14,80  | 17,96 | 33,74  | 2,01   | miotto:candidate_533A* (8) |
| 3961750-3961836  | Rv3524-Rv3525c  | 1,41   | 17,07 | 0,00   | 0,00   |                            |
| 3964010-3964109  | Rv3527-Rv3528c  | 1,22   | 12,06 | 0,00   | 2,50   |                            |
| 3964224-3964518  | Rv3527-Rv3528c  | 0,41   | 34,29 | 0,00   | 1,69   |                            |
| 3964340-3964440c | Rv3527-Rv3528c  | 7,27   | 17,46 | 4,14   | 1,24   |                            |
| 3965402-3965507  | Rv3528c-Rv3529c | 36,93  | 6,13  | 0,99   | 10,60  |                            |
| 3965752-3965942c | Rv3528c-Rv3529c | 0,64   | 16,03 | 0,55   | 1,96   |                            |
| 3970575-3970729c | Rv3532-Rv3533c  | 8,68   | 37,72 | 0,00   | 0,00   |                            |
| 3972328-3972645c | Rv3533c-Rv3534c | 7,31   | 47,56 | 1,64   | 2,75   |                            |
| 3977808-3978125  | Rv3538-Rv3539   | 5,39   | 37,64 | 3,62   | 0,78   |                            |
| 3986719-3986863  | Rv3546-Rv3547   | 1,69   | 21,12 | 0,00   | 0,00   |                            |
| 3995663-3995763  | Rv3555c-Rv3556c | 4,84   | 18,37 | 0,00   | 6,18   |                            |
| 3997748-3997832  | Rv3557c-Rv3558  | 1,44   | 12,01 | 0,00   | 0,00   |                            |
| 4012299-4012356  | Rv3570c-Rv3571  | 21,09  | 6,40  | 19,84  | 6,46   |                            |
| 4013376-4013632  | Rv3571-Rv3572   | 6,19   | 22,02 | 7,33   | 0,49   |                            |
| 4016288-4016607  | Rv3573c-Rv3574  | 24,08  | 46,40 | 4,90   | 2,34   | miotto:candidate_539A (8)  |

|                  |                 |         |          |          |                                                                                                                                               |
|------------------|-----------------|---------|----------|----------|-----------------------------------------------------------------------------------------------------------------------------------------------|
| 4029794-4029908c | Rv3587c-Rv3588c | 19,15   | 13,72    | 33,65    | 1,09                                                                                                                                          |
| 4037998-4038207c | Rv3595c-Rv3596c | 13,98   | 31,81    | 16,93    | 4,75                                                                                                                                          |
| 4041203-4041635c | Rv3597c-Rv3598c | 224,61  | 80,58    | 65,22    | 4,61 miotto:candidate_543A* (8)                                                                                                               |
| 4054567-4054941c | Rv3614c-Rv3615c | 87,43   | 41,82    | 127,18   | 39,94                                                                                                                                         |
| 4056305-4056583  | Rv3616c-Rv3617  | 1,32    | 28,93    | 0,75     | 8,95 miotto:candidate_552A (8)                                                                                                                |
| 4056316-4056483c | Rv3616c-Rv3617  | 161,66  | 24,85    | 31,75    | 26,00 miotto:candidate_552A* (8)                                                                                                              |
| 4056578-4056685c | Rv3616c-Rv3617  | 24,92   | 24,92    | 21,31    | 8,09                                                                                                                                          |
| 4057060-4057154  | Rv3616c-Rv3617  | 0,00    | 11,72    | 0,00     | 7,88                                                                                                                                          |
| 4082647-4082841c | Rv3644c-Rv3645  | 10,67   | 101,83   | 6,44     | 15,36                                                                                                                                         |
| 4087144-4087414c | Rv3646c-Rv3647c | 109,70  | 24,31    | 33,19    | 5,07                                                                                                                                          |
| 4088597-4088686c | Rv3648c-Rv3649  | 2313,49 | 181,46   | 1012,19  | 55,47 miotto:candidate_560A* (8)                                                                                                              |
| 4091168-4091252  | Rv3649-Rv3650   | 14,39   | 2,18     | 8,61     | 2,94                                                                                                                                          |
| 4093501-4093608c | Rv3651-Rv3652   | 1,13    | 30,93    | 0,00     | 2,31                                                                                                                                          |
| 4093538-4093601  | Rv3651-Rv3652   | 21,03   | 8,70     | 0,00     | 0,00                                                                                                                                          |
| 4094552-4094651c | Rv3653-Rv3654c  | 13,46   | 20,41    | 3,14     | 2,50                                                                                                                                          |
| 4099159-4099353c | Rv3660c-Rv3661  | 6,27    | 16,18    | 6,97     | 0,00                                                                                                                                          |
| 4099332-4099478c | Rv3660c-Rv3661  | 785,61  | 283,42   | 562,08   | 34,81 MTB000058,B11,mpr19,ncRNA:RVn<br>c0004,arnvig:MTS2822<br>MTB000078,ncRNA:RVnc0036a,<br>arnvig:MTS2823 (7);<br>miotto:candidate_561A (8) |
| 4100641-4101158  | Rv3661-Rv3662c  | 9539,53 | 23811,10 | 17415,70 | 92495,90                                                                                                                                      |
| 4101211-4101314  | Rv3661-Rv3662c  | 5,88    | 13,38    | 4,02     | 2,40                                                                                                                                          |
| 4107304-4107427  | Rv3666c-Rv3667  | 7,89    | 14,97    | 1,69     | 1,01                                                                                                                                          |
| 4107412-4107512c | Rv3666c-Rv3667  | 1,21    | 11,02    | 1,04     | 0,00                                                                                                                                          |
| 4110671-4110914  | Rv3668c-Rv3669  | 22,06   | 3,80     | 9,86     | 7,67                                                                                                                                          |
| 4114275-4114617c | Rv3672c-Rv3673c | 75,26   | 23,54    | 72,57    | 14,92                                                                                                                                         |
| 4115918-4116030c | Rv3674c-Rv3675  | 6,50    | 32,85    | 0,00     | 2,21                                                                                                                                          |
| 4121485-4121700c | Rv3681c-Rv3682  | 177,84  | 108,26   | 14,04    | 23,11                                                                                                                                         |
| 4121714-4121832  | Rv3681c-Rv3682  | 0,00    | 17,93    | 0,00     | 0,00                                                                                                                                          |
| 4124335-4124430c | Rv3682-Rv3683   | 15,29   | 11,60    | 2,18     | 16,90                                                                                                                                         |
| 4125388-4125441  | Rv3683-Rv3684   | 6,80    | 8,59     | 11,62    | 11,56                                                                                                                                         |
| 4126447-4126528  | Rv3684-Rv3685c  | 7,46    | 6,79     | 17,86    | 3,04                                                                                                                                          |
| 4126659-4126713  | Rv3684-Rv3685c  | 13,35   | 18,56    | 5,70     | 2,27                                                                                                                                          |
| 4126738-4126839  | Rv3684-Rv3685c  | 2,40    | 23,65    | 5,13     | 2,45                                                                                                                                          |

|                  |                 |       |       |       |       |
|------------------|-----------------|-------|-------|-------|-------|
| 4126937-4127114  | Rv3684-Rv3685c  | 8,25  | 19,29 | 0,59  | 3,51  |
| 4127188-4127272c | Rv3684-Rv3685c  | 20,15 | 12,01 | 11,07 | 5,87  |
| 4129230-4129298c | Rv3686c-Rv3687c | 3,55  | 14,79 | 4,55  | 0,00  |
| 4135983-4136159c | Rv3693-Rv3694c  | 33,87 | 19,40 | 14,77 | 9,87  |
| 4148145-4148242c | Rv3704c-Rv3705c | 19,97 | 21,78 | 22,41 | 25,47 |
| 4153620-4153675  | Rv3709c-Rv3710  | 48,06 | 9,94  | 9,34  | 4,46  |

MTB000059,C8,ncRNA:RVnc0006,D

|                  |                 |        |         |        |         |                            |
|------------------|-----------------|--------|---------|--------|---------|----------------------------|
| 4168126-4168325c | Rv3722c-Rv3723  | 922,41 | 1607,61 | 595,11 | 2047,48 | ichiara2:Mcr6              |
| 4168433-4168566  | Rv3722c-Rv3723  | 171,63 | 77,56   | 31,22  | 5,59    |                            |
| 4169333-4169406c | Rv3723-Rv3724A  | 0,00   | 15,05   | 0,00   | 1,69    |                            |
| 4169406-4169504  | Rv3723-Rv3724A  | 80,32  | 18,75   | 17,96  | 6,30    |                            |
| 4171053-4171727  | Rv3725-Rv3726   | 56,73  | 7,29    | 28,82  | 4,62    | miotto:candidate_571A (8)  |
| 4171183-4171265c | Rv3725-Rv3726   | 17,69  | 4,47    | 3,78   | 6,01    | miotto:candidate_571A* (8) |
| 4172685-4172762  | Rv3726-Rv3727   | 0,00   | 14,28   | 0,00   | 0,00    |                            |
| 4172774-4172873c | Rv3726-Rv3727   | 0,00   | 16,70   | 0,00   | 1,25    |                            |
| 4174754-4174861c | Rv3727-Rv3728   | 12,46  | 30,07   | 0,97   | 1,16    |                            |
| 4178118-4178306c | Rv3728-Rv3729   | 4,53   | 14,24   | 0,00   | 1,32    |                            |
| 4185909-4186034  | Rv3734c-Rv3735  | 54,37  | 4,42    | 13,28  | 1,98    |                            |
| 4185973-4186071c | Rv3734c-Rv3735  | 0,00   | 12,18   | 0,00   | 0,00    |                            |
| 4190534-4190667c | Rv3739c-Rv3740c | 21,00  | 15,93   | 7,02   | 1,86    |                            |
| 4190780-4190837c | Rv3739c-Rv3740c | 6,33   | 19,20   | 1,80   | 0,00    |                            |
| 4193118-4193453  | Rv3742c-Rv3743c | 6,92   | 25,13   | 0,00   | 1,86    |                            |
| 4195835-4195915  | Rv3744-Rv3745c  | 4,53   | 20,62   | 1,29   | 1,54    |                            |
| 4196426-4196597c | Rv3746c-Rv3747  | 9,25   | 42,08   | 4,26   | 4,35    |                            |
| 4197092-4197169  | Rv3747-Rv3748   | 15,68  | 5,95    | 5,36   | 0,00    |                            |
| 4198132-4198257c | Rv3749c-Rv3750c | 42,72  | 108,26  | 27,39  | 14,86   |                            |
| 4198553-4198646c | Rv3750c-Rv3751  | 18,22  | 29,61   | 14,46  | 1,33    |                            |
| 4198673-4198745  | Rv3750c-Rv3751  | 1,68   | 15,25   | 1,43   | 3,42    |                            |
| 4200355-4200428  | Rv3753c-Rv3754  | 24,80  | 0,00    | 11,31  | 0,00    |                            |
| 4205487-4205577  | Rv3759c-Rv3760  | 22,85  | 4,08    | 0,00   | 0,00    |                            |
| 4208847-4208943c | Rv3762c-Rv3763  | 0,00   | 16,26   | 0,00   | 1,29    |                            |
| 4209416-4209735  | Rv3763-Rv3764c  | 57,34  | 5,51    | 26,47  | 3,90    |                            |
| 4210970-4211099c | Rv3764c-Rv3765c | 13,17  | 17,13   | 12,87  | 8,64    |                            |
| 4214936-4215170  | Rv3769-Rv3770c  | 6,25   | 3,95    | 22,25  | 2,66    |                            |

|                  |                 |        |       |       |                                  |
|------------------|-----------------|--------|-------|-------|----------------------------------|
| 4216231-4216317c | Rv3770B-Rv3771c | 25,31  | 7,47  | 15,63 | 4,30                             |
| 4216743-4216864c | Rv3771c-Rv3772  | 40,11  | 11,41 | 12,86 | 4,09                             |
| 4224856-4224955c | Rv3778c-Rv3779  | 53,83  | 12,99 | 12,55 | 3,74                             |
| 4234576-4234677  | Rv3787c-Rv3788  | 1,20   | 13,65 | 3,08  | 0,00                             |
| 4234724-4234809  | Rv3787c-Rv3788  | 19,92  | 10,79 | 9,73  | 7,26                             |
| 4249808-4249909c | Rv3795-Rv3796   | 1,20   | 20,92 | 0,00  | 0,00                             |
| 4252925-4252988c | Rv3797-Rv3798   | 1,91   | 10,15 | 4,90  | 58,50                            |
| 4254279-4254379c | Rv3798-Rv3799c  | 23,01  | 14,70 | 35,21 | 2,47 STS:STS1*                   |
| 4262952-4263452c | Rv3801c-Rv3802c | 50,79  | 82,60 | 19,62 | 17,44 miotto:candidate_577A* (8) |
| 4264470-4264566c | Rv3802c-Rv3803c | 30,27  | 0,96  | 8,63  | 1,29                             |
| 4266802-4266925c | Rv3804c-Rv3805c | 16,77  | 1,50  | 13,50 | 0,00                             |
| 4268795-4268914c | Rv3805c-Rv3806c | 34,66  | 4,64  | 20,92 | 6,24                             |
| 4273474-4273602c | Rv3809c-Rv3810  | 4,74   | 23,02 | 0,00  | 0,97                             |
| 4274617-4274724c | Rv3810-Rv3811   | 37,38  | 10,31 | 0,00  | 0,00                             |
| 4278208-4278301c | Rv3812-Rv3813c  | 13,01  | 0,99  | 17,80 | 9,29                             |
| 4285823-4285884  | Rv3820c-Rv3821  | 11,84  | 16,46 | 0,00  | 0,00                             |
| 4287886-4288251  | Rv3822-Rv3823c  | 211,25 | 16,73 | 42,01 | 11,25                            |
| 4291564-4291686c | Rv3823c-Rv3824c | 27,85  | 3,77  | 15,31 | 7,10 miotto:candidate_585A* (8)  |
| 4310836-4310944c | Rv3836-Rv3837c  | 4,49   | 22,13 | 12,47 | 2,29                             |
| 4310849-4310901  | Rv3836-Rv3837c  | 25,39  | 3,50  | 1,97  | 0,00                             |
| 4314010-4314130c | Rv3840-Rv3841   | 14,15  | 10,74 | 1,73  | 0,00                             |
| 4316619-4316784c | Rv3843c-Rv3844  | 4,42   | 16,21 | 11,97 | 7,52                             |
| 4316881-4316979c | Rv3843c-Rv3844  | 7,41   | 7,50  | 21,13 | 3,78                             |
| 4317148-4317210  | Rv3843c-Rv3844  | 13,59  | 14,73 | 0,00  | 1,98 MTB000080,arnvig:MTS2975    |
| 4317348-4317449  | Rv3843c-Rv3844  | 0,00   | 11,83 | 0,00  | 0,00 MTB000080,arnvig:MTS2975    |
| 4318418-4318609  | Rv3843c-Rv3844  | 11,47  | 13,53 | 5,45  | 5,20                             |
| 4319739-4319836c | Rv3845-Rv3846   | 4,99   | 14,20 | 3,20  | 10,19                            |
| 4319968-4320150c | Rv3845-Rv3846   | 49,47  | 10,65 | 12,57 | 7,50 arnvig:MTS2977 (7)          |
| 4320265-4320421c | Rv3845-Rv3846   | 52,99  | 18,91 | 23,32 | 6,36 arnvig:MTS2977 (7)          |
| 4320461-4320535c | Rv3845-Rv3846   | 21,20  | 1,24  | 2,79  | 3,33 arnvig:MTS2977 (7)          |
| 4321389-4321595  | Rv3846-Rv3847   | 176,12 | 43,03 | 59,12 | 19,90                            |
| 4322076-4322275  | Rv3847-Rv3848   | 122,34 | 16,24 | 26,67 | 1,87                             |
| 4323375-4323476c | Rv3848-Rv3849   | 0,00   | 18,19 | 0,00  | 0,00                             |
| 4323848-4323992  | Rv3849-Rv3850   | 27,84  | 7,68  | 17,31 | 0,86                             |

|                  |                 |        |        |       |                                  |
|------------------|-----------------|--------|--------|-------|----------------------------------|
| 4323944-4324033c | Rv3849-Rv3850   | 1,36   | 13,40  | 0,00  | 0,00                             |
| 4324942-4325043c | Rv3851-Rv3852   | 1,20   | 16,37  | 0,00  | 1,22                             |
| 4328075-4328423  | Rv3855-Rv3856c  | 66,95  | 75,24  | 25,47 | 35,76                            |
| 4329694-4329796  | Rv3857c-Rv3858c | 0,00   | 14,41  | 0,00  | 0,00                             |
| 4329800-4330044c | Rv3857c-Rv3858c | 41,94  | 25,75  | 7,68  | 2,55                             |
| 4335958-4336398c | Rv3859c-Rv3860  | 10,26  | 42,08  | 11,15 | 11,32 miotto:candidate_592A* (8) |
| 4336486-4336605c | Rv3859c-Rv3860  | 2,04   | 23,97  | 0,00  | 6,24                             |
| 4336608-4336703  | Rv3859c-Rv3860  | 7,65   | 15,47  | 7,63  | 3,90                             |
| 4338723-4338805  | Rv3862c-Rv3863  | 25,06  | 6,71   | 1,26  | 3,01                             |
| 4341373-4341616  | Rv3864-Rv3865   | 264,73 | 146,41 | 52,29 | 14,32 miotto:candidate_593A (8)  |
| 4341453-4341554c | Rv3864-Rv3865   | 0,00   | 13,65  | 0,00  | 2,45 miotto:candidate_593A* (8)  |
| 4350520-4350831  | Rv3871-Rv3872   | 126,26 | 786,64 | 23,13 | 35,60                            |
| 4351014-4351128  | Rv3872-Rv3873   | 34,04  | 188,81 | 27,28 | 14,11                            |
| 4359616-4359966c | Rv3879c-Rv3880c | 39,73  | 57,63  | 8,94  | 9,96                             |
| 4360022-4360102c | Rv3879c-Rv3880c | 25,68  | 25,20  | 3,87  | 7,70                             |
| 4360117-4360221c | Rv3879c-Rv3880c | 8,16   | 17,67  | 2,99  | 4,75                             |
| 4364742-4364869  | Rv3883c-Rv3884c | 0,96   | 18,12  | 0,00  | 0,98 miotto:candidate_596A (8)   |
| 4373678-4373769c | Rv3889c-Rv3890c | 35,90  | 25,22  | 32,97 | 18,99                            |
| 4382910-4383031c | Rv3896c-Rv3897c | 23,06  | 19,01  | 5,14  | 3,07                             |
| 4386883-4386983c | Rv3901c-Rv3902c | 12,11  | 15,62  | 7,25  | 7,41                             |
| 4387127-4387228c | Rv3901c-Rv3902c | 35,98  | 6,37   | 4,10  | 0,00                             |
| 4387333-4387387c | Rv3901c-Rv3902c | 6,67   | 20,25  | 0,00  | 2,27                             |
| 4405188-4405249c | Rv3916c-Rv3917c | 21,70  | 107,76 | 3,37  | 8,05                             |
| 4405318-4405466c | Rv3916c-Rv3917c | 56,65  | 229,80 | 17,55 | 28,48                            |
| 4408195-4408265c | Rv3919c-Rv3920c | 22,40  | 0,00   | 19,15 | 5,27                             |
| 4411148-4411248c | Rv3924c-        | 0,00   | 15,62  | 0,00  | 1,24                             |
| 4411225-4411532  | Rv3924c-        | 46,07  | 88,57  | 24,45 | 6,48 miotto:candidate_601A (8)   |

(c) complementary strand

(\*) Antisense

DiChiara JM *et al.* 2010. Nucleic Acids Research. **38**(12):4067.



**Table S2C. Intergenic regions with higher RPKMs in the different carbon sources and culture conditions applied.**

| <b>Genome region</b> | <b>Flanking genes</b> | <b>Annotation</b> | <b>Growth Phase</b> | <b>RPKMs</b> |
|----------------------|-----------------------|-------------------|---------------------|--------------|
| 4100641-4101198      | Rv3661-Rv3662c1, 2    | MTS2823           | FS                  | 92495.9      |
|                      |                       |                   | FE                  | 17415.7      |
|                      |                       |                   | DS                  | 23811.1      |
|                      |                       |                   | DE                  | 9539.5       |
| 1412981-1413227c     | Rv1264-Rv12651        | MTS0977           | FS                  | 25523.1      |
|                      |                       |                   | FE                  | 803.3        |
|                      |                       |                   | DS                  | 1207.04      |
|                      |                       |                   | DE                  | 1836.5       |
| 3467872-3468503c     | Rv3098A-Rv3099c       | ssr               | FS                  | 17806.9      |
|                      |                       |                   | FE                  | 2899.2       |
|                      |                       |                   | DS                  | 4244.31      |
|                      |                       |                   | DE                  | 9332.9       |
| 2500379-2500822c     | Rv2226-Rv2227         | rnpB              | FS                  | 11090        |
|                      |                       |                   | FE                  | 1292.3       |
|                      |                       |                   | DS                  | 958.8        |
|                      |                       |                   | DE                  | 3229.2       |
| 4168126-4168325c     | Rv3722c-Rv3723        |                   | FS                  | 2047.5       |
|                      |                       |                   | FE                  | 595.1        |
|                      |                       |                   | DS                  | 1607.61      |
|                      |                       |                   | DE                  | 922.4        |
| 3893958-3894144      | Rv3476c-Rv3477        |                   | FS                  | 182.2        |
|                      |                       |                   | FE                  | 422.3        |

|                  |                 |         |    |         |
|------------------|-----------------|---------|----|---------|
|                  |                 |         | DE | 826.9   |
| 4088597-4088686c | Rv3648c-Rv3649  |         | FE | 1012.2  |
|                  |                 |         | DE | 2313.49 |
| 4099332-4099478c | Rv3660c-Rv3661  | MTS2822 | FE | 562.1   |
|                  |                 |         | DE | 785.6   |
| 3599519-3599749c | Rv3223c-Rv3224  |         | FS | 254.5   |
| 2047414-2047726  | Rv1804c-Rv1805c |         | FS | 183.4   |
| 528426-528553    | Rv0439c-Rv0440  |         | FS | 156.01  |
| 1469510-1469576  | Rv1313c-Rv1314c |         | FS | 139.7   |
| 2121742-2122033c | Rv1871c-Rv1872c |         | FE | 595.3   |
| 3670371-3670483c | Rv3289c-Rv3290c |         | FE | 325.8   |
| 419713-419842    | Rv0349-Rv0350   |         | DS | 2177.02 |
| 2047995-2048101  | Rv1805c-Rv1806  |         | DS | 805.6   |
| 4350520-4350831  | Rv3871-Rv3872   |         | DS | 786.6   |
| 301577-301800c   | Rv0249c-Rv0250c |         | DS | 560.5   |
| 2835568-2835819  | Rv2518c-Rv2519  |         | DS | 500.04  |
| 596662-596823    | Rv0505c-Rv0506  |         | DE | 1078.4  |
| 1564285-1564382  | Rv1388-Rv1389   |         | DE | 530.5   |

Growth phase: DE, Dextrose exponential; DS, Dextrose stationary; FE, LC-FA exponential; FS, LC-FA stationary.
