# Supplementary material for: Global Adaptation to a Lipid Environment Triggers the Dormancy-Related Phenotype of Mycobacterium tuberculosis
Source: PubMed Central journal article supplement — mBio. 2014 May 20;5(3):e01125-14. doi: 10.1128/mBio.01125-14 (PMC4030484; doi:10.1128/mbio.01125-14), 2014-05-20
Supplement: mbo002141827st3.pdf [file mbo002141827st3.pdf]

**Table S3. Functional categories with significant increase or decrease expression in the fatty acid model.**

| Functional category                     | Genes in functional category | Number of genes with significant expression |              |              |                           |              |              |
|-----------------------------------------|------------------------------|---------------------------------------------|--------------|--------------|---------------------------|--------------|--------------|
|                                         |                              | Increase expression LC-FA                   |              |              | Decrease expression LC-FA |              |              |
|                                         | FC (%FC)                     | Total FC                                    | (%Total)     | (%Total/%FC) | Total FC                  | (%Total)     | (%Total/%FC) |
| virulence, detoxification, adaptation   | 238 (5.91)                   | 7                                           | (6.03)       | 1.02         | 9                         | (8.65)       | <b>1.46</b>  |
| Lipid metabolism                        | 272 (6.77)                   | 7                                           | (6.03)       | 0.89         | 5                         | (4.81)       | 0.71         |
| information pathways                    | 242 (6.03)                   | 13                                          | (11.21)      | <b>1.86</b>  | 7                         | (6.73)       | 1.12         |
| cell wall and cell processes            | 773 (19.22)                  | 10                                          | (8.62)       | 0.45         | 21                        | (20.19)      | 1.05         |
| insertion seqs and phages               | 147 (3.66)                   | 1                                           | (0.86)       | 0.23         | 1                         | (0.96)       | 0.26         |
| PE/PPE                                  | 168 (4.18)                   | 0                                           | (0.00)       | 0.00         | 9                         | (8.65)       | <b>2.07</b>  |
| intermediary metabolism and respiration | 936 (23.31)                  | 38                                          | (32.76)      | <b>1.41</b>  | 20                        | (19.23)      | 0.82         |
| regulatory proteins                     | 198 (4.93)                   | 6                                           | (5.17)       | 1.05         | 4                         | (3.85)       | 0.78         |
| unknown +conserved hypotheticals        | 1048 (25.95)                 | 33                                          | (28.44)      | 1.09         | 28                        | (26.92)      | 1.04         |
| <b>TOTAL genes</b>                      | <b>4022 (100)</b>            | <b>116</b>                                  | <b>(100)</b> | <b>1.00</b>  | <b>104</b>                | <b>(100)</b> | <b>1.00</b>  |
|                                         |                              |                                             |              |              |                           |              |              |
|                                         | FC (%FC)                     | Total FC                                    | (%Total)     | (%Total/%FC) | Total FC                  | (%Total)     | (%Total/%FC) |
| virulence, detoxification, adaptation   | 238 (5.91)                   | 12                                          | (10.81)      | <b>1.83</b>  | 15                        | (9.38)       | <b>1.59</b>  |
| Lipid metabolism                        | 272 (6.77)                   | 7                                           | (6.31)       | 0.93         | 7                         | (4.38)       | 0.65         |
| information pathways                    | 242 (6.03)                   | 9                                           | (8.11)       | 1.34         | 15                        | (9.38)       | <b>1.55</b>  |
| cell wall and cell processes            | 773 (19.22)                  | 25                                          | (22.52)      | 1.17         | 18                        | (11.11)      | 0.58         |
| insertion seqs and phages               | 147 (3.66)                   | 1                                           | (0.90)       | 0.25         | 7                         | (4.38)       | 1.18         |
| PE/PPE                                  | 168 (4.18)                   | 6                                           | (5.40)       | 1.29         | 7                         | (4.38)       | 1.05         |
| intermediary metabolism and respiration | 936 (23.31)                  | 16                                          | (14.14)      | 0.61         | 36                        | (22.5)       | 0.97         |
| regulatory proteins                     | 198 (4.93)                   | 4                                           | (3.60)       | 0.73         | 17                        | (10.63)      | <b>2.16</b>  |
| unknown +conserved hypotheticals        | 1048 (25.95)                 | 30                                          | (27.02)      | 1.04         | 40                        | (25)         | 0.96         |
| <b>TOTAL genes</b>                      | <b>4022 (100)</b>            | <b>111</b>                                  | <b>(100)</b> | <b>1.00</b>  | <b>160</b>                | <b>(100)</b> | <b>1.00</b>  |

Genes were organized based on functional categories (FC) according to Tuberculist (<http://tuberculist.epfl.ch/>).

%FC, percentage of genes in each functional category related to the total number of genes; Total FC, number of genes in a functional category with significant increased or decreased expression in each phase of growth; %Total, percentage of genes in a functional category related to the total number of genes with significant increased or decreased expression in each phase of growth; %Total/%FC, ratio of percentage of genes with increased or decreased expression in each functional categories and phase of growth. Ratio values over-represented showed in **bold** and under-represented showed in *italics*.
