# Supplementary material for: Global Adaptation to a Lipid Environment Triggers the Dormancy-Related Phenotype of Mycobacterium tuberculosis
Source: PubMed Central journal article supplement — mBio. 2014 May 20;5(3):e01125-14. doi: 10.1128/mBio.01125-14 (PMC4030484; doi:10.1128/mbio.01125-14), 2014-05-20
Supplement: mbo002141827st4.pdf [file mbo002141827st4.pdf]

**Table S4. Genes related to reductive stress during growth of *Mycobacterium tuberculosis* in fatty acids**

**(A) Number of genes related to reductive stress with significant expression during growth in different carbon sources.**

| Relation to reductive stress                                                      | Number of genes with significant decreased expression (%) |                 | Number of genes with significant increased expression (%) |                 |
|-----------------------------------------------------------------------------------|-----------------------------------------------------------|-----------------|-----------------------------------------------------------|-----------------|
|                                                                                   | FE                                                        | FS              | FE                                                        | FS              |
| Known generators of reductive equivalents                                         | 1 (0.9)                                                   | 5 (3.13)        | 1 (0.86)                                                  | 3 (2.9)         |
| Known generators of reductive sinks<br>[reductive sinks lipid metabolism-related] | 4 (3.6)<br>[4]                                            | 1 (0.63)<br>[1] | 8 (6.9)<br>[6]                                            | 6 (5.77)<br>[4] |
| Other reductive stress-related genes                                              | 1 (0.9)                                                   | 5 (3.13)        | 5 (4.3)                                                   | 4 (3.8)         |
| Heme-related genes                                                                | 2 (1.8)                                                   | 1 (0.63)        | 7 (6.03)                                                  | 5 (4.8)         |
| Total reductive stress-related genes                                              | 8 (7.2)                                                   | 12 (7.5)        | 21 (18.1)                                                 | 18 (17.3)       |
| TOTAL genes compared                                                              | 111 (100)                                                 | 160 (100)       | 116 (100)                                                 | 104 (100)       |

Genes with significant increased or decreased expression during growth in fatty acids (FE, FS) (see Supplementary Table S2 E & F) were checked against 371 genes related with reductive stress ([www.tuberculist.epfl.ch](http://www.tuberculist.epfl.ch)).

The list of genes related with reductive stress included those within the functional category of “lipid metabolism” as well as genes participating in the Heme-group synthesis and stabilization.

Growth phase: FE, Dubos LC-FA exponential; FS, Dubos LC-FA stationary.

**(B) Genes related to the Heme-prosthetic group with significant increase expression during growth in long-chain fatty acids.**

| Gene tag | Gene name   | Growth phase | Functional category                     | Function                                | Relationships to the Heme-group | Fisher exact test |
|----------|-------------|--------------|-----------------------------------------|-----------------------------------------|---------------------------------|-------------------|
| Rv0508   |             | FE           | unknown                                 | putative thioredoxin                    | Fe-S cluster stabilization      | 8.02 E-07         |
| Rv0509   | <i>hemA</i> | FE           | intermediary metabolism and respiration | Heme biosynthesis                       |                                 | 6.16 E-12         |
| Rv0510   | <i>hemC</i> | FS           | intermediary metabolism and respiration | Heme biosynthesis                       |                                 | 3.43 E-06         |
| Rv0512   | <i>hemB</i> | FE           | intermediary metabolism and respiration | Heme biosynthesis                       |                                 | 0.021             |
| Rv1324   |             | FS           | intermediary metabolism and respiration | Thioredoxin                             | Fe-S cluster stabilization      | 4.27 E-4          |
| Rv1462   | <i>sufD</i> | FE           | unknown                                 | UNK, putative FeS cluster formation     | Fe-S cluster assembly           | 0.034             |
| Rv1465   |             | FS           | intermediary metabolism and respiration | Probable Nitrogen fixation / Suf system | Fe-S cluster assembly           | 0.002             |
| Rv1466   |             | FS           | unknown                                 | UNK, domain of unknown function         |                                 | 0.37 E-4          |
| Rv1932   | <i>tpx</i>  | FE           | virulence, detoxification, adaptation   | Thiol peroxidase                        | Fe-S cluster stabilization      | 0.012             |
| Rv2007c* | <i>fdxA</i> | FS           | intermediary metabolism and respiration | Ferredoxin                              | Fe-S cluster stabilization      | 1.09 E-12         |
| Rv2391   | <i>nirA</i> | FE           | intermediary metabolism and respiration | Ferredoxin-dependent nitrite reductase  | Fe-S cluster stabilization      | 2.64 E-06         |
| Rv3673c  |             | FE           | intermediary metabolism and respiration | Possible thioredoxin                    | Fe-S cluster stabilization      | 0.028             |

Asterisks in gene tags indicate those genes members of the DosR regulon.  
Growth phase: FE, Dubos LC-FA exponential; FS, Dubos LC-FA stationary.
