# Supplementary material for: Global Adaptation to a Lipid Environment Triggers the Dormancy-Related Phenotype of Mycobacterium tuberculosis
Source: PubMed Central journal article supplement — mBio. 2014 May 20;5(3):e01125-14. doi: 10.1128/mBio.01125-14 (PMC4030484; doi:10.1128/mbio.01125-14), 2014-05-20
Supplement: mbo002141827st5.pdf [file mbo002141827st5.pdf]

**Table S5. Primers used for the qRT-PCR**

| <b>Gene tag</b> | <b>primers sequence<br/>(5'-3')</b>                   | <b>Tm<br/>(°C)</b> | <b>size of the product<br/>(nt)</b> |
|-----------------|-------------------------------------------------------|--------------------|-------------------------------------|
| Rv0079          | F- ACCTGGTCGACATGGATGCC<br>R- TGAGCACGGCGTCGACTTCG    | 60°C               | 141                                 |
| Rv0211          | F- TGGCATTGTCTGGATCCGTCCG<br>R- CATGCAACCCCGGTACAGGTC | 61°C               | 149                                 |
| Rv0467          | F- CACACCTACCCCGACCAGAGC<br>R- CCAGCCAGTTCTCCACCGAAG  | 61°C               | 133                                 |
| Rv1066          | F- GCGTAGTGATCGAGCGCAACG<br>R- GCAACCCCAAGTCCAGCAGC   | 58°C               | 159                                 |
| Rv1184c         | F- GAGTACACGAACCAGGCTGGC<br>R- GTCTTGGTGGCTCCCTGGC    | 61°C               | 126                                 |
| Rv1733c         | F- CAACCGCGACCGTGATCGATC<br>R- GTTGACCTCACCGCTGCGTTC  | 61°C               | 134                                 |
| Rv1996          | F- AAGCGCACCAAATCGTCGAAC<br>R- ATCGCGACCTGCCTGGAGATG  | 60°C               | 139                                 |
| Rv2794c         | F- AATGGTGTGCTGGATGCGATC<br>R- TCTTGGTCAGCGGAAACCACG  | 58°C               | 139                                 |
| Rv3131          | F- CTGGCAGGCCAAGGTAACCG<br>R- CACCGGCCAGCAACTGTAGG    | 61°C               | 160                                 |
| Rv3134c         | F- GGGCAGTGGTTCGTTGGTATCG<br>R- CGGACAGTTGGGACGGATCG  | 58°C               | 129                                 |
| Rv3416          | F- TACCGGGACCCAACGCAGAC<br>R- ATTTCCCTTGGCGCGTTGTTCG  | 60°C               | 136                                 |
| Rv3612c         | F- CTGTGCTCACCTATGCGCGAC<br>R- ATCGCTCCGGTCGCATGTGTC  | 61°C               | 166                                 |
| Rv3614c         | F- CGGAGACGGACACCGAACAAG<br>R- CGACTCACTCATCCAGGCCAC  | 60°C               | 137                                 |
| Rv3686c         | F- GAGTGACCGCGGTGATCATGC<br>R- GCCAGGTGTCCGATCGTCAGC  | 62°C               | 150                                 |
